# Supplementary material for: How corporate ESG performance enables New-qualitive Productive forces development based on Listed companies in the manufacturing industry: Evidence from China
Source: Research Square preprint supplement (doi:10.21203/rs.3.rs-6158355/v1), 2025-07-24
Supplement: Supplementary file 1 [file 06e4d14ffc9e870fb9857465.xlsx]

## Sheet: Sheet1
股票代码	年份	NPRO	新质生产力	E分数	数字化转型程度	无形资产占比	研发人员数量占比	绿色技术水平	绿色专利占比	研究生以上人数占比	固定资产占比	董监高是否具有海外背景	资本积累率A	高管绿色认知	创新水平	行业代码	行业名称	所属省份	所属省份代码	所属城市	所属城市代码
2	2011	0.12188	12.188	3	0	0.0014702	0	0	0	3.3129	0.0054	1	0.242668	0.693147	2.63906	K70	房地产业	广东省	440000	深圳市	440300
2	2012	0.114189	11.4189	3	1.09861	0.0011268	0	0	0	3.414	0.0043	1	0.210897	0	0.693147	K70	房地产业	广东省	440000	深圳市	440300
2	2013	0.126494	12.6494	4	1.60944	0.0008975	0	0	0	3.7588	0.0044	1	0.283683	0	0	K70	房地产业	广东省	440000	深圳市	440300
2	2014	0.130791	13.0791	2	3.17805	0.0017261	0	0	0	3.6337	0.0045	1	0.099149	0	1.38629	K70	房地产业	广东省	440000	深圳市	440300
2	2015	0.122935	12.2934	3	1.60944	0.0017095	0	0	0	3.52	0.008	1	0.176162	0	1.09861	K70	房地产业	广东省	440000	深圳市	440300
2	2016	0.0977077	9.77077	2	1.09861	0.0015173	0	0	0	3.0113	0.0082	1	0.186098	0	0	K70	房地产业	广东省	440000	深圳市	440300
2	2017	0.105854	10.5854	2	1.38629	0.0012335	0	0	0	3.176	0.0061	1	0.154613	0	0.693147	K70	房地产业	广东省	440000	深圳市	440300
2	2018	0.125741	12.5741	3	2.07944	0.00324	0	0	0	3.0997	0.0075	1	0.262205	0.693147	0	K70	房地产业	广东省	440000	深圳市	440300
2	2019	0.109433	10.9433	2	1.60944	0.0030462	0	0	0	3.2	0.0072	1	0.148367	0.693147	0	K70	房地产业	广东省	440000	深圳市	440300
2	2020	0.109655	10.9655	2	2.19722	0.0032569	0	0	0	2.95	0.0067	1	0.292947	0	0	K70	房地产业	广东省	440000	深圳市	440300
2	2021	0.168928	16.8928	7	2.3979	0.0053879	0	0	0	3.48	0.0066	1	0.122707	0	0	K70	房地产业	广东省	440000	深圳市	440300
2	2022	0.162943	16.2943	7	2.19722	0.0065718	0	0	0	0	0.0093	1	0.031109	0	0	K70	房地产业	广东省	440000	深圳市	440300
4	2011	0.0854888	8.54888	1	0	0.0578346	0	0	0	3.73	0.1865	1	0.071145	0	0	C27	医药制造业	广东省	440000	深圳市	440300
4	2012	0.0957206	9.57206	1	0.693147	0.0550521	0	0	0	4.33	0.2412	1	0.069696	0	0	C27	医药制造业	广东省	440000	深圳市	440300
4	2013	0.0857899	8.57899	1	0	0.0505603	0	0	0	4.9383	0.1697	1	-0.023971	0	0	C27	医药制造业	广东省	440000	深圳市	440300
4	2014	0.0853099	8.53099	1	0	0.0626161	0	0	0	5.91	0.1118	1	0.089114	0	0	C27	医药制造业	广东省	440000	深圳市	440300
4	2015	0.0932337	9.32337	1	0	0.081097	0	0	0	4.33	0.0948	1	0.037561	1.09861	0	C27	医药制造业	广东省	440000	深圳市	440300
4	2016	0.0877917	8.77917	1	0	0.109017	0	0	0	4.47	0.1496	1	0.091269	0	0	C27	医药制造业	广东省	440000	深圳市	440300
4	2017	0.116691	11.6691	1	1.94591	0.0883302	13.77	0	0	4.65	0.1161	1	0.033065	0	0	C27	医药制造业	广东省	440000	深圳市	440300
4	2018	0.12617	12.617	1	2.89037	0	27.8	0	0	3.33	0.0028	1	-0.004158	0	0	C27	医药制造业	广东省	440000	深圳市	440300
4	2019	0.128041	12.8041	1	3.91202	0.0145727	10.76	0	0	5.18	0.0015	1	6.66096	0	0	C27	医药制造业	广东省	440000	深圳市	440300
4	2020	0.170228	17.0228	1	4.74493	0.0178724	55.68	0	0	5.68	0.0013	1	0.037289	0	0	I65	软件和信息技术服务业	广东省	440000	深圳市	440300
4	2021	0.178036	17.8036	1	4.64439	0.0336037	69.53	0	0	3.88	0.0022	1	-0.349103	0	0	I65	软件和信息技术服务业	广东省	440000	深圳市	440300
4	2023	0.0685312	6.85312	1	2.30259	0.0440715	49.33	0	0	4.39	0.0039	0	-0.450151	0	0	I65	软件和信息技术服务业	广东省	440000	深圳市	440300
5	2011	0.0008478	1.22037	1	0	0	0	0	0	0	0.0208	0	-0.022772	0	0	S90	综合	广东省	440000	深圳市	440300
5	2012	0.0031307	1.22037	1	0	0	0	0	0	2.09	0.0182	0	0.033583	0	0	K70	房地产业	广东省	440000	深圳市	440300
5	2013	0.0088652	1.22037	1	0	0	0	0	0	1.8617	0.0208	0	-0.084819	0.693147	0	K70	房地产业	广东省	440000	深圳市	440300
5	2014	0.0040301	1.22037	1	0	0	0	0	0	2.85	0.019	0	0.072841	0	0	K70	房地产业	广东省	440000	深圳市	440300
5	2015	0.0318735	3.18735	1	1.38629	0.0171641	0	0	0	8.04	0.017	0	0.811515	0.693147	0	K70	房地产业	广东省	440000	深圳市	440300
5	2016	0.0257968	2.57968	1	1.38629	0.0148019	0	0	0	8.09	0.0149	0	0.117158	0	0	N77	生态保护和环境治理业	广东省	440000	深圳市	440300
5	2017	0.0082412	1.22037	1	0	0.0114154	0	0	0	6.24	0.0113	0	0.036178	0	0	N77	生态保护和环境治理业	广东省	440000	深圳市	440300
5	2018	0.0152316	1.52316	1	0	0.0220824	8.19	0	0	6.71	0.009	0	0.124574	0	0	N77	生态保护和环境治理业	广东省	440000	深圳市	440300
5	2019	0.0159523	1.59523	1	0	0.0212907	9.56	0	0	6.47	0.0102	0	0.10319	0	0	N77	生态保护和环境治理业	广东省	440000	深圳市	440300
5	2020	0.260625	26.0625	1	0	0.0244543	10.33	0.693147	100	6.2	0.0115	0	-0.238977	0	0.693147	N77	生态保护和环境治理业	广东省	440000	深圳市	440300
6	2011	0.100897	10.0897	3	0.693147	0.0026006	0	0	0	0	0.0008	1	0.12923	0	0	K70	房地产业	广东省	440000	深圳市	440300
6	2012	0.0347107	3.47107	3	1.09861	0.0022569	0	0	0	0	0.0006	0	0.228469	0	0	K70	房地产业	广东省	440000	深圳市	440300
6	2013	0.0398066	3.98066	2	0.693147	0.0020598	0	0	0	18.2432	0.0005	0	0.179756	0	0	K70	房地产业	广东省	440000	深圳市	440300
6	2014	0.0244926	2.44925	2	0	0	0	0	0	11.55	0.0004	0	0.006582	0	0	K70	房地产业	广东省	440000	深圳市	440300
6	2015	0.0185083	1.85083	1	0	0	0	0	0	16.19	0.0003	0	0.066594	0	0	K70	房地产业	广东省	440000	深圳市	440300
6	2016	0.0248582	2.48582	1	0.693147	0	0	0	0	15.1351	0.0002	0	0.141209	0	0	K70	房地产业	广东省	440000	深圳市	440300
6	2017	0.111445	11.1445	2	1.09861	0	0	0	0	15.41	0.0002	1	0.112573	0	0	K70	房地产业	广东省	440000	深圳市	440300
6	2018	0.098548	9.85479	2	0	0	0	0	0	14.59	0.0005	1	0.11893	0	0	K70	房地产业	广东省	440000	深圳市	440300
6	2019	0.0993924	9.93924	2	0	0	0	0	0	15.32	0.0008	1	0.12278	0	0	K70	房地产业	广东省	440000	深圳市	440300
6	2020	0.0885424	8.85424	1	0	0	0	0	0	15.62	0.0029	1	0.093131	0	0	K70	房地产业	广东省	440000	深圳市	440300
6	2021	0.112197	11.2197	3	0	0	0	0	0	16.63	0.0018	1	0.044192	0	0	K70	房地产业	广东省	440000	深圳市	440300
6	2022	0.11149	11.149	3	0	0	0	0	0	16	0.0021	1	0.034833	0	0	K70	房地产业	广东省	440000	深圳市	440300
6	2023	0.0521588	5.21588	4	0	0	0	0	0	16	0.0016	0	-0.121345	0	0	K70	房地产业	广东省	440000	深圳市	440300
7	2012	0.0901252	9.01252	1	0	0.0005029	0	0	0	0	0.1079	1	0.015319	1.79176	0	H61	住宿业	广东省	440000	深圳市	440300
7	2013	0.107463	10.7463	3	0	0.0005123	0	0	0	0	0.1252	1	0.190202	1.09861	0	H61	住宿业	广东省	440000	深圳市	440300
7	2014	0.128178	12.8178	3	1.94591	0.0004315	0	0	0	0	0.1129	1	0.013364	1.09861	0	H61	住宿业	广东省	440000	深圳市	440300
7	2015	0.0567938	5.67938	2	2.77259	0.0005222	0	0	0	0	0.1499	0	0.04154	1.09861	0	H61	住宿业	广东省	440000	深圳市	440300
7	2016	0.145586	14.5586	3	2.56495	0.0004041	13.55	0	0	0	0.1342	1	0.172719	1.09861	0	H61	住宿业	广东省	440000	深圳市	440300
7	2017	0.132692	13.2692	3	2.19722	0.0007355	0	0	0	0	0.1577	1	-0.107048	1.09861	0	K70	房地产业	广东省	440000	深圳市	440300
7	2018	0.119296	11.9296	2	1.38629	0.0005333	0	0	0	7.14	0.122	1	-0.502527	1.09861	0	K70	房地产业	广东省	440000	深圳市	440300
7	2019	0.0408024	4.08024	2	0.693147	0.0004356	0	0	0	7.14	0.1126	0	0.095648	1.09861	0	K70	房地产业	广东省	440000	深圳市	440300
7	2020	0.0421205	4.21205	2	1.09861	0.0004642	0	0	0	3.95	0.1268	0	-0.681388	1.09861	0	K70	房地产业	广东省	440000	深圳市	440300
7	2022	0.0375626	3.75626	3	1.09861	0.0002517	0	0	0	2.63	0	0	-0.103187	0	0	K70	房地产业	广东省	440000	深圳市	440300
8	2013	0.0920529	9.20529	1	0	0.0021151	0	0	0	0.185	0.5368	1	0.04208	0	0	H61	住宿业	广东省	440000	深圳市	440300
8	2014	0.0887841	8.87841	1	0	0.001343	0	0	0	0.16	0.4555	1	0.061688	0	0	H61	住宿业	广东省	440000	深圳市	440300
8	2015	0.115893	11.5893	1	2.07944	0.0161856	15.25	0	0	5.12	0.1193	1	3.86013	0	0	C37	铁路、船舶、航空航天和其它运输设备制造业	北京市	110000	北京市	110000
8	2016	0.154332	15.4332	1	2.70805	0.0205662	38.52	0	0	13.0321	0.0223	1	1.12254	1.09861	0	C37	铁路、船舶、航空航天和其它运输设备制造业	北京市	110000	北京市	110000
8	2017	0.100019	10.0019	1	3.13549	0.0186982	56.97	0	0	11.58	0.023	0	0.164369	1.09861	0	C37	铁路、船舶、航空航天和其它运输设备制造业	北京市	110000	北京市	110000
8	2018	0.114689	11.4689	1	4.02535	0.0223504	56.63	0	0	11.44	0.0294	0	0.030304	1.09861	0.693147	C37	铁路、船舶、航空航天和其它运输设备制造业	北京市	110000	北京市	110000
8	2019	0.116923	11.6923	1	3.55535	0.0233226	55.27	0	0	10.65	0.0368	0	0.023178	1.09861	1.94591	C37	铁路、船舶、航空航天和其它运输设备制造业	北京市	110000	北京市	110000
8	2020	0.10523	10.523	1	2.30259	0.0260981	57.73	0	0	10.73	0.0351	0	-0.119832	1.09861	1.94591	C37	铁路、船舶、航空航天和其它运输设备制造业	北京市	110000	北京市	110000
8	2021	0.109285	10.9285	3	2.30259	0.0248528	28.21	0	0	9.69	0.0333	0	-0.199811	1.38629	2.19722	C37	铁路、船舶、航空航天和其它运输设备制造业	北京市	110000	北京市	110000
8	2022	0.0925043	9.25043	3	1.38629	0.0228172	27.2	0	0	8.96	0.0387	0	-0.160408	1.09861	1.79176	C37	铁路、船舶、航空航天和其它运输设备制造业	北京市	110000	北京市	110000
8	2023	0.114014	11.4014	5	1.38629	0.0189026	27.78	0	0	9.72	0.0482	0	-0.184316	1.38629	1.09861	C37	铁路、船舶、航空航天和其它运输设备制造业	北京市	110000	北京市	110000
9	2011	0.0897304	8.97304	2	0	0.0155809	0	0	0	3.21	0.0838	1	0.109429	0	0	S90	综合	广东省	440000	深圳市	440300
9	2012	0.0912451	9.12451	2	0	0.0308584	0	0	0	3.6	0.0889	1	0.139099	0	0	S90	综合	广东省	440000	深圳市	440300
9	2013	0.116387	11.6387	3	0.693147	0.034644	0	0	0	2.8405	0.1161	1	0.076572	0.693147	0	S90	综合	广东省	440000	深圳市	440300
9	2014	0.105674	10.5674	1	1.38629	0.0361866	0	0	0	3.62	0.1124	1	0.081421	1.09861	0	S90	综合	广东省	440000	深圳市	440300
9	2015	0.119212	11.9213	2	1.60944	0.0299802	4.27	0	0	3.68	0.1243	1	0.199383	0.693147	0	S90	综合	广东省	440000	深圳市	440300
9	2016	0.116789	11.6789	1	2.19722	0.0438411	5.72	0	0	3.73	0.1382	1	0.241266	0.693147	0	S90	综合	广东省	440000	深圳市	440300
9	2017	0.146304	14.6304	4	1.38629	0.039458	5.16	0	0	3.15	0.137	1	0.222646	1.38629	0	S90	综合	广东省	440000	深圳市	440300
9	2018	0.122363	12.2363	1	1.94591	0.0367502	6.01	0	0	2.93	0.1402	1	0.050739	1.79176	0	S90	综合	广东省	440000	深圳市	440300
9	2019	0.0766443	7.66443	3	1.79176	0.0363562	5.49	0	0	3.27	0.1544	0	0.024596	2.19722	0	S90	综合	广东省	440000	深圳市	440300
9	2020	0.058893	5.8893	2	1.38629	0.0339305	6.89	0	0	4.06	0.1444	0	0.239384	1.79176	0	S90	综合	广东省	440000	深圳市	440300
9	2021	0.0475314	4.75314	1	1.79176	0.0310868	8.7	0	0	4.08	0	0	0.182207	1.79176	0	S90	综合	广东省	440000	深圳市	440300
9	2022	0.0647278	6.47278	3	1.60944	0.0269759	9.06	0	0	4.13	0	0	0.203317	1.38629	0	S90	综合	广东省	440000	深圳市	440300
9	2023	0.0846412	8.46412	4	2.07944	0.0337315	9.65	0	0	4.84	0	0	0.115738	1.60944	0	S90	综合	广东省	440000	深圳市	440300
10	2013	0.0037424	1.22037	1	0	0.0076549	0	0	0	1.3423	0.0425	0	2.51508	0	0	C35	专用设备制造业	北京市	110000	北京市	110000
10	2014	0.0050061	1.22037	1	0	0.0063251	0	0	0	1.99	0.0598	0	-0.163858	0	0	C35	专用设备制造业	北京市	110000	北京市	110000
10	2015	0.0065851	1.22037	1	0	0.0023701	0	0	0	0	0.0111	0	2.93463	0.693147	0	E48	土木工程建筑业	北京市	110000	北京市	110000
10	2016	0.078995	7.8995	1	0	0.0024875	0	0	0	1.56	0.0144	1	0.018107	0.693147	0	E48	土木工程建筑业	广东省	440000	深圳市	440300
10	2017	0.0775023	7.75023	1	0	0.0037668	0	0	0	0	0.0202	1	-0.469145	0.693147	0	E48	土木工程建筑业	广东省	440000	深圳市	440300
10	2018	0.0832641	8.32641	1	0	0.003049	3.3	0	0	2.94	0.0217	1	-0.499142	0.693147	0	E48	土木工程建筑业	广东省	440000	深圳市	440300
10	2020	0.0851514	8.51514	1	0	0.0005266	0	0	0	2.16	0.0064	1	0.082979	1.38629	0	E48	土木工程建筑业	广东省	440000	深圳市	440300
10	2021	0.0966121	9.66121	2	0	0.0004758	0	0	0	2.41	0.004	1	0.051605	1.38629	0	E48	土木工程建筑业	广东省	440000	深圳市	440300
10	2022	0.0267355	2.67355	2	0	0.0005716	0	0	0	3.03	0.0038	0	0.0443	1.38629	0	E48	土木工程建筑业	广东省	440000	深圳市	440300
10	2023	0.0207998	2.07998	2	0	0.0006242	0	0	0	3.03	0.0033	0	-0.721919	0.693147	0	E48	土木工程建筑业	广东省	440000	深圳市	440300
11	2011	0.0023955	1.22037	1	0	0.0285863	0	0	0	0	0.0186	0	0.292622	0	0	K70	房地产业	广东省	440000	深圳市	440300
11	2012	0.002468	1.22037	1	0	0.0288804	0	0	0	0	0.02	0	0.316632	0	0	K70	房地产业	广东省	440000	深圳市	440300
11	2013	0.0023688	1.22037	1	0	0.0276112	0	0	0	0	0.0194	0	0.199216	0	0	K70	房地产业	广东省	440000	深圳市	440300
11	2014	0.0128582	1.28582	1	0	0.025698	0	0	0	1.2	0.0165	0	0.150507	1.09861	0	K70	房地产业	广东省	440000	深圳市	440300
11	2015	0.0436667	4.36667	3	1.60944	0.0211518	0	0	0	1.38	0.0196	0	0.012368	0	0	K70	房地产业	广东省	440000	深圳市	440300
11	2016	0.0215889	2.15889	2	0.693147	0.0128469	0	0	0	1.3669	0.0111	0	0.147816	0	0	K70	房地产业	广东省	440000	深圳市	440300
11	2017	0.011523	1.22037	2	0	0	0	0	0	0	0.0054	0	0.212027	0	0	K70	房地产业	广东省	440000	深圳市	440300
11	2018	0.0783907	7.83908	1	0.693147	0	0	0	0	0	0.0056	1	0.143246	0	0	K70	房地产业	广东省	440000	深圳市	440300
11	2019	0.0936167	9.36167	1	2.07944	6.5e-05	0	0	0	0	0.0087	1	-0.15843	0	0	K70	房地产业	广东省	440000	深圳市	440300
11	2020	0.0949398	9.49398	1	2.19722	3.95e-05	0	0	0	0	0.0095	1	0.157521	0	0	K70	房地产业	广东省	440000	深圳市	440300
11	2021	0.0348836	3.48836	3	1.09861	0.0001017	0.04	0	0	0	0.0074	0	0.198346	0	0	K70	房地产业	广东省	440000	深圳市	440300
11	2022	0.0306306	3.06306	3	0.693147	8.03e-05	0.4	0	0	0	0.0052	0	-0.036244	0	0	K70	房地产业	广东省	440000	深圳市	440300
11	2023	0.0538501	5.38501	4	1.79176	5.24e-05	0.43	0	0	0	0.0039	0	0.052152	0	0	K70	房地产业	广东省	440000	深圳市	440300
12	2011	0.195675	19.5675	4	0	0.0597769	0	0.693147	6.66667	0	0.6172	1	0.080885	1.09861	2.77259	C30	非金属矿物制品业	广东省	440000	深圳市	440300
12	2012	0.190099	19.0099	3	0	0.0648367	0	0.693147	14.2857	1.23	0.657	1	-0.005166	0	2.07944	C30	非金属矿物制品业	广东省	440000	深圳市	440300
12	2013	0.131141	13.1141	1	0	0.0618965	0	0	0	1.2957	0.5292	1	0.155846	2.07944	2.3979	C30	非金属矿物制品业	广东省	440000	深圳市	440300
12	2014	0.143109	14.3109	3	0	0.0619316	0	0	0	1.2	0.6445	1	0.013417	0.693147	1.94591	C30	非金属矿物制品业	广东省	440000	深圳市	440300
12	2015	0.152561	15.2561	2	0.693147	0.054048	1.54	0	0	1.24	0.6514	1	-0.116483	1.60944	2.56495	C30	非金属矿物制品业	广东省	440000	深圳市	440300
12	2016	0.152833	15.2833	2	1.38629	0.0602129	1.16	0	0	1.5371	0.6682	1	0.062793	0.693147	2.48491	C30	非金属矿物制品业	广东省	440000	深圳市	440300
12	2017	0.173507	17.3507	3	1.38629	0.0536075	1.11	0	0	1.59	0.5908	1	0.080012	2.19722	2.48491	C30	非金属矿物制品业	广东省	440000	深圳市	440300
12	2018	0.166072	16.6072	3	1.38629	0.0541864	1.35	0	0	1.58	0.5196	1	0.076291	2.07944	1.94591	C30	非金属矿物制品业	广东省	440000	深圳市	440300
12	2019	0.119778	11.9778	5	1.60944	0.0574041	1.76	0	0	1.59	0.5375	0	0.044069	2.56495	1.09861	C30	非金属矿物制品业	广东省	440000	深圳市	440300
12	2020	0.106008	10.6008	4	2.19722	0.0637322	1.61	0	0	1.59	0.5114	0	0.076023	1.60944	1.09861	C30	非金属矿物制品业	广东省	440000	深圳市	440300
12	2021	0.0733764	7.33764	1	2.56495	0.0585581	1.45	0	0	1.46	0.4296	0	0.117804	2.63906	0	C30	非金属矿物制品业	广东省	440000	深圳市	440300
12	2022	0.0691615	6.91615	1	2.19722	0.0555166	1.51	0	0	1.24	0.434	0	0.127481	2.63906	0	C30	非金属矿物制品业	广东省	440000	深圳市	440300
12	2023	0.077922	7.7922	1	2.30259	0.0820277	12.82	0	0	1.24	0.433	0	0.086802	2.3979	0	C30	非金属矿物制品业	广东省	440000	深圳市	440300
14	2011	0.0194415	1.94415	1	0	0	0	0	0	11.3	0.0159	0	0.079387	0.693147	0	K70	房地产业	广东省	440000	深圳市	440300
14	2012	0.0137386	1.37386	1	0	0	0	0	0	11.56	0.0133	0	0.048228	0	0	K70	房地产业	广东省	440000	深圳市	440300
14	2013	0.0095579	1.22037	1	0	9.9e-05	0	0	0	7.8341	0.0149	0	0.047626	0	0	K70	房地产业	广东省	440000	深圳市	440300
14	2014	0.0093638	1.22037	1	0	6.54e-05	0	0	0	7.83	0.0101	0	0.090149	0	0	K70	房地产业	广东省	440000	深圳市	440300
14	2015	0.0801976	8.01976	1	0	0.0003234	0	0	0	8.06	0.0095	1	0.068541	0	0	K70	房地产业	广东省	440000	深圳市	440300
14	2016	0.079496	7.9496	1	0	0.0002807	0	0	0	7.41	0.0106	1	0.02801	0	0	K70	房地产业	广东省	440000	深圳市	440300
14	2017	0.0842458	8.42458	1	0	0.0002289	0	0	0	11.54	0.0117	1	0.007001	0	0	K70	房地产业	广东省	440000	深圳市	440300
14	2018	0.0937039	9.37039	1	1.09861	9.98e-05	0	0	0	9.46	0.0081	1	0.187596	0	0	K70	房地产业	广东省	440000	深圳市	440300
14	2019	0.0888179	8.88179	1	0.693147	2.85e-05	0	0	0	9.09	0.0072	1	0.005965	0	0	K70	房地产业	广东省	440000	深圳市	440300
14	2020	0.0890103	8.90103	1	0.693147	0	0	0	0	9.15	0.0104	1	-0.002249	0	0	K70	房地产业	广东省	440000	深圳市	440300
14	2021	0.120661	12.0661	3	1.09861	0	0	0	0	13.28	0.0097	1	0.041757	0	0	K70	房地产业	广东省	440000	深圳市	440300
14	2022	0.117995	11.7995	3	1.09861	0	0	0	0	11.01	0.0076	1	0.227208	0	0	K70	房地产业	广东省	440000	深圳市	440300
14	2023	0.0548604	5.48604	4	0.693147	0	0	0	0	11.5	0.0083	0	0.402954	0	0	K70	房地产业	广东省	440000	深圳市	440300
16	2011	0.177323	17.7323	2	2.30259	0.0114976	0	0.693147	0.204082	1.04	0.1052	1	0.002957	0	6.19644	C39	计算机、通信和其他电子设备制造业	广东省	440000	深圳市	440300
16	2012	0.206524	20.6524	2	2.19722	0.0175259	0	1.60944	2.0202	0.93	0.114	1	0.002412	0.693147	5.29331	C39	计算机、通信和其他电子设备制造业	广东省	440000	深圳市	440300
16	2013	0.226673	22.6673	3	2.3979	0.0228406	0	1.94591	4.05405	0.8665	0.1212	1	0.00783	0	5.00395	C39	计算机、通信和其他电子设备制造业	广东省	440000	深圳市	440300
16	2014	0.189941	18.9941	3	1.94591	0.0207175	0	1.09861	1.73913	0.95	0.1063	1	0.003863	0	4.75359	C39	计算机、通信和其他电子设备制造业	广东省	440000	深圳市	440300
16	2015	0.187458	18.7458	2	3.3673	0.0247427	6.54	0.693147	0.689655	0.92	0.1238	1	-0.284356	0	4.98361	C39	计算机、通信和其他电子设备制造业	广东省	440000	深圳市	440300
16	2016	0.191205	19.1205	3	3.4012	0.0175169	0	0.693147	0.909091	0.9086	0.0913	1	0.079029	0	4.70953	C39	计算机、通信和其他电子设备制造业	广东省	440000	深圳市	440300
16	2017	0.181516	18.1516	4	3.43399	0.0087041	7.59	0	0	0.8753	0.0674	1	1.47045	0	4.21951	C39	计算机、通信和其他电子设备制造业	广东省	440000	深圳市	440300
16	2018	0.228726	22.8726	4	4.00733	0.022367	7.74	0.693147	0.775194	0.8648	0.0731	1	0.15286	1.60944	4.86754	C39	计算机、通信和其他电子设备制造业	广东省	440000	深圳市	440300
16	2019	0.219086	21.9086	4	3.61092	0.0284893	7.75	0.693147	1.69491	1.05	0.0601	1	0.050292	1.38629	4.09434	C39	计算机、通信和其他电子设备制造业	广东省	440000	深圳市	440300
16	2020	0.230751	23.0752	4	4.04305	0.0238428	8.74	0.693147	1.92308	1.79	0.0637	1	0.080006	2.07944	3.97029	C39	计算机、通信和其他电子设备制造业	广东省	440000	深圳市	440300
16	2021	0.222445	22.2445	2	3.61092	0.0244591	9.27	1.09861	4.7619	2.4	0.1006	1	-0.048498	2.07944	3.7612	C39	计算机、通信和其他电子设备制造业	广东省	440000	深圳市	440300
16	2022	0.224922	22.4922	2	3.63759	0.0293752	10.59	1.09861	5.12821	2.72	0.1082	1	-0.170531	2.07944	3.68888	C39	计算机、通信和其他电子设备制造业	广东省	440000	深圳市	440300
16	2023	0.16081	16.081	4	3.63759	0.0303529	10.48	0.693147	2.85714	2.59	0.1457	0	-0.302018	2.07944	3.58352	C39	计算机、通信和其他电子设备制造业	广东省	440000	深圳市	440300
17	2014	0.0837661	8.37661	1	0.693147	0.0877458	0	0	0	0	0.015	1	0.75302	0	0	C37	铁路、船舶、航空航天和其它运输设备制造业	广东省	440000	深圳市	440300
17	2015	0.0761422	7.61422	1	0	0.0820814	0	0	0	0	0.022	1	-0.007845	0	0	C37	铁路、船舶、航空航天和其它运输设备制造业	广东省	440000	深圳市	440300
17	2016	0.085888	8.5888	1	0	0.0556867	12.96	0	0	0	0.0689	1	0.290628	0	0	C37	铁路、船舶、航空航天和其它运输设备制造业	广东省	440000	深圳市	440300
17	2017	0.026315	2.6315	1	0.693147	0.0307096	13.73	0	0	0	0.0536	0	0.091377	0	0.693147	C37	铁路、船舶、航空航天和其它运输设备制造业	广东省	440000	深圳市	440300
17	2018	0.0232479	2.32479	1	0.693147	0.0205617	13.21	0	0	0	0	0	-0.099704	0	0.693147	C37	铁路、船舶、航空航天和其它运输设备制造业	广东省	440000	深圳市	440300
17	2019	0.0191268	1.91268	1	0	0.0120031	25.42	0	0	0	0	0	-0.326191	0	0	C37	铁路、船舶、航空航天和其它运输设备制造业	广东省	440000	深圳市	440300
17	2021	0.0439287	4.39287	2	0	0	31.67	0	0	1.64	0	0	-0.06394	0	1.09861	C37	铁路、船舶、航空航天和其它运输设备制造业	广东省	440000	深圳市	440300
17	2022	0.22829	22.829	2	0	0	22.22	1.60944	28.5714	1.59	0	1	11.7005	0	2.70805	C37	铁路、船舶、航空航天和其它运输设备制造业	广东省	440000	深圳市	440300
17	2023	0.0368854	3.68854	1	1.09861	0	15.94	0	0	1.45	0.0062	0	0.014937	0	1.60944	C37	铁路、船舶、航空航天和其它运输设备制造业	广东省	440000	深圳市	440300
19	2011	0.090396	9.0396	1	0	0.190714	0	0	0	2.91	0.142	1	1.3861	0	0	C15	酒、饮料和精制茶制造业	广东省	440000	深圳市	440300
19	2012	0.0183975	1.83975	1	0	0.162145	0	0	0	3.51	0.1308	0	0.130686	0	0	C15	酒、饮料和精制茶制造业	广东省	440000	深圳市	440300
19	2013	0.0509369	5.09369	1	1.60944	0.153924	0	0	0	3.2927	0.2306	0	0.00548	1.38629	0	C15	酒、饮料和精制茶制造业	广东省	440000	深圳市	440300
19	2014	0.0635144	6.35144	1	2.30259	0.170586	0	0	0	2.95	0.3442	0	-0.017838	1.38629	0	C15	酒、饮料和精制茶制造业	广东省	440000	深圳市	440300
19	2015	0.0725698	7.25698	1	2.30259	0.182051	4.15	0	0	3.2	0.338	0	-0.036734	1.09861	1.09861	C15	酒、饮料和精制茶制造业	广东省	440000	深圳市	440300
19	2016	0.0644374	6.44374	1	2.30259	0.166034	4.29	0	0	3.381	0.2826	0	0.096747	1.38629	0	C15	酒、饮料和精制茶制造业	广东省	440000	深圳市	440300
19	2017	0.0696741	6.96741	1	2.19722	0.175003	4.65	0	0	3.63	0.2931	0	-0.082483	1.38629	0.693147	C15	酒、饮料和精制茶制造业	广东省	440000	深圳市	440300
19	2018	0.0756204	7.56204	1	3.52636	0.0881128	6.11	0	0	8.67	0.1535	0	0.091818	1.38629	0	C15	酒、饮料和精制茶制造业	广东省	440000	深圳市	440300
19	2019	0.0750176	7.50176	1	3.46574	0.0869611	7.45	0	0	8.41	0.1395	0	0.065898	1.38629	0	F51	批发业	广东省	440000	深圳市	440300
19	2020	0.0810076	8.10076	1	3.82864	0.0819913	7.46	0	0	9.95	0.1536	0	0.03716	1.38629	0	F51	批发业	广东省	440000	深圳市	440300
19	2021	0.0856106	8.56106	1	3.55535	0.079457	8.84	0	0	11.58	0.2774	0	-0.020508	1.38629	0	F51	批发业	广东省	440000	深圳市	440300
19	2022	0.0849471	8.49471	1	3.21888	0.0798819	11	0	0	12.46	0.2878	0	0.028866	1.38629	0	F51	批发业	广东省	440000	深圳市	440300
19	2023	0.0849588	8.49588	1	2.63906	0.0738425	11.86	0	0	13.25	0.2936	0	0.009317	1.38629	0.693147	F51	批发业	广东省	440000	深圳市	440300
20	2011	0.0970472	9.70472	1	0	0.0777448	0	0	0	0.4	0.3106	1	0.038919	1.09861	0	C39	计算机、通信和其他电子设备制造业	广东省	440000	深圳市	440300
20	2012	0.096083	9.6083	1	0	0.0741413	0	0	0	0.19	0.2974	1	0.011706	1.09861	0	C39	计算机、通信和其他电子设备制造业	广东省	440000	深圳市	440300
20	2013	0.0945255	9.45255	1	0	0.0674931	0	0	0	0.191	0.2674	1	-0.023261	1.09861	0	C39	计算机、通信和其他电子设备制造业	广东省	440000	深圳市	440300
20	2014	0.0946846	9.46846	1	1.38629	0.0411671	0	0	0	0.28	0.1603	1	0.028091	0	0	C39	计算机、通信和其他电子设备制造业	广东省	440000	深圳市	440300
20	2015	0.0917737	9.17737	1	1.38629	0.0401496	0	0	0	0	0.0958	1	0.115819	0	0	C39	计算机、通信和其他电子设备制造业	广东省	440000	深圳市	440300
20	2016	0.0797143	7.97143	1	0	0.0709563	0	0	0	0	0.1289	1	0.018352	0	0	C39	计算机、通信和其他电子设备制造业	广东省	440000	深圳市	440300
20	2017	0.0863231	8.63232	1	0	0.0687677	0	0	0	0.6	0.1328	1	0.003048	0.693147	0	C39	计算机、通信和其他电子设备制造业	广东省	440000	深圳市	440300
20	2018	0.0867916	8.67915	1	0	0.0677627	0	0	0	0.3	0.3048	1	0.010275	0	0	C39	计算机、通信和其他电子设备制造业	广东省	440000	深圳市	440300
20	2019	0.0875106	8.75106	1	0	0.0699628	0	0	0	0.2	0.3228	1	0.016854	0	0	C39	计算机、通信和其他电子设备制造业	广东省	440000	深圳市	440300
20	2020	0.0936137	9.36137	1	0	0.0650239	9.07	0	0	0.53	0.3084	1	0.020705	0	0	C39	计算机、通信和其他电子设备制造业	广东省	440000	深圳市	440300
20	2021	0.1221	12.21	3	0.693147	0.0593569	8.57	0	0	0.53	0.2847	1	0.021418	0	0	C39	计算机、通信和其他电子设备制造业	广东省	440000	深圳市	440300
20	2022	0.12378	12.378	3	0	0.0615264	20.55	0	0	1.04	0.2808	1	0.029488	0	0	C39	计算机、通信和其他电子设备制造业	广东省	440000	深圳市	440300
20	2023	0.0531323	5.31323	2	1.09861	0.0626522	20.38	0	0	0.62	0.275	0	0.037735	0	0	C39	计算机、通信和其他电子设备制造业	广东省	440000	深圳市	440300
21	2011	0.296724	29.6724	4	1.94591	0.0051229	0	2.30259	31.0345	0.78	0.1432	1	-0.035216	0.693147	3.4012	C39	计算机、通信和其他电子设备制造业	广东省	440000	深圳市	440300
21	2012	0.23587	23.587	4	0	0.0050948	0	1.94591	20.6897	0.75	0.1235	1	-0.038048	0	3.4012	C39	计算机、通信和其他电子设备制造业	广东省	440000	深圳市	440300
21	2013	0.165415	16.5415	3	1.09861	0.0064769	0	0.693147	7.69231	0.7661	0.0892	1	0.193664	0	2.63906	C39	计算机、通信和其他电子设备制造业	广东省	440000	深圳市	440300
21	2014	0.168653	16.8653	3	1.09861	0.0102353	0	0.693147	5	0.64	0.0969	1	0.019728	0.693147	3.04452	C39	计算机、通信和其他电子设备制造业	广东省	440000	深圳市	440300
21	2015	0.237007	23.7007	3	0.693147	0.0102229	2.41	1.94591	16.6667	0.63	0.1475	1	0.02899	1.09861	3.61092	C39	计算机、通信和其他电子设备制造业	广东省	440000	深圳市	440300
21	2016	0.239331	23.9331	4	1.60944	0.0122749	1.46	1.60944	13.7931	0.473	0.2167	1	0.017605	0.693147	3.4012	C39	计算机、通信和其他电子设备制造业	广东省	440000	深圳市	440300
21	2017	0.188002	18.8002	3	2.48491	0.0138359	2.71	0.693147	5	0.73	0.1469	1	0.119198	0.693147	3.04452	C39	计算机、通信和其他电子设备制造业	广东省	440000	深圳市	440300
21	2018	0.252889	25.2889	2	3.17805	0.0368671	3.16	1.79176	20	0.97	0.1652	1	0.077234	0.693147	3.2581	C39	计算机、通信和其他电子设备制造业	广东省	440000	深圳市	440300
21	2019	0.20328	20.328	3	2.30259	0.0306447	2.08	1.09861	5.40541	0.73	0.1474	1	0.049086	0.693147	3.63759	C39	计算机、通信和其他电子设备制造业	广东省	440000	深圳市	440300
21	2020	0.238829	23.8829	4	2.07944	0.0278526	2.07	1.60944	10.8108	0.77	0.1549	1	0.12783	0.693147	3.63759	C39	计算机、通信和其他电子设备制造业	广东省	440000	深圳市	440300
21	2021	0.328024	32.8024	3	3.04452	0.0219974	2.01	2.56495	40	0.93	0.1575	1	0.432456	0.693147	3.43399	C39	计算机、通信和其他电子设备制造业	广东省	440000	深圳市	440300
21	2022	0.243872	24.3872	3	3.09104	0.0210383	3.39	1.79176	8.92857	1.53	0.1516	1	0.042574	0.693147	4.04305	C39	计算机、通信和其他电子设备制造业	广东省	440000	深圳市	440300
21	2023	0.176224	17.6224	3	2.89037	0.0152769	3.49	1.60944	11.1111	1.61	0.1772	0	0.068462	1.60944	3.61092	C39	计算机、通信和其他电子设备制造业	广东省	440000	深圳市	440300
23	2011	0.005773	1.22037	1	0	0.0080851	0	0	0	0.82	0.1105	0	0.087731	0	0	E47	房屋建筑业	广东省	440000	深圳市	440300
23	2012	0.0055392	1.22037	1	0	0.0072372	0	0	0	1.01	0.1002	0	0.180016	0	0	C30	非金属矿物制品业	广东省	440000	深圳市	440300
23	2013	0.0756685	7.56685	1	0	0.0079647	0	0	0	0.8921	0.0912	1	0.018802	0	0	C30	非金属矿物制品业	广东省	440000	深圳市	440300
23	2014	0.075502	7.5502	1	0	0.0065806	0	0	0	1.0805	0.0835	1	0.022928	0	0	C30	非金属矿物制品业	广东省	440000	深圳市	440300
23	2015	0.0163062	1.63062	1	1.09861	0.0054989	0	0	0	0.89	0.0756	0	0.05179	0	0	C30	非金属矿物制品业	广东省	440000	深圳市	440300
23	2016	0.0130704	1.30704	1	0	0.0049678	0	0	0	0.94	0.0595	0	0.020272	1.09861	0	C30	非金属矿物制品业	广东省	440000	深圳市	440300
23	2017	0.013425	1.3425	1	0	0.0025698	0	0	0	0.98	0.0708	0	0.050909	1.09861	0	C30	非金属矿物制品业	广东省	440000	深圳市	440300
23	2018	0.0172836	1.72836	1	0	0.0017794	0	0	0	0.92	0.0613	0	0.058817	1.60944	0	C30	非金属矿物制品业	广东省	440000	深圳市	440300
23	2019	0.0984799	9.84799	1	0.693147	0.0012835	0	0	0	0.83	0.0696	1	0.153741	1.94591	0	C30	非金属矿物制品业	广东省	440000	深圳市	440300
23	2020	0.109122	10.9122	2	1.09861	0.0010666	0	0	0	0.81	0.0632	1	0.036123	1.38629	0	C30	非金属矿物制品业	广东省	440000	深圳市	440300
23	2021	0.0971699	9.71699	2	0	0.0007216	0	0	0	0.78	0.0652	1	-0.077438	1.38629	0	C30	非金属矿物制品业	广东省	440000	深圳市	440300
23	2022	0.094645	9.4645	2	0	0.0078708	0	0	0	0.73	0.0547	1	-0.554206	1.09861	0	C30	非金属矿物制品业	广东省	440000	深圳市	440300
25	2011	0.0848202	8.48202	1	0	0.0002875	0	0	0	2.5	0.2884	1	0.007927	0	0	F51	批发业	广东省	440000	深圳市	440300
25	2012	0.012316	1.2316	1	0	0.0001653	0	0	0	2.42	0.242	0	-0.00159	0	0	F51	批发业	广东省	440000	深圳市	440300
25	2013	0.0821829	8.21829	1	0	4.74e-05	0	0	0	2.7682	0.2139	1	0.013199	0	0	F51	批发业	广东省	440000	深圳市	440300
25	2014	0.103944	10.3944	1	1.79176	0.0668766	0	0	0	2.66	0.1772	1	0.039724	0	0	F51	批发业	广东省	440000	深圳市	440300
25	2015	0.0396816	3.96816	1	2.70805	0.0453382	0	0	0	2.51	0.1169	0	3.34235	0	0	F51	批发业	广东省	440000	深圳市	440300
25	2016	0.0317787	3.17787	1	1.94591	0.0451969	0	0	0	3.24	0.1087	0	0.034086	0	0	F51	批发业	广东省	440000	深圳市	440300
25	2017	0.0386629	3.86629	1	2.48491	0.0373043	0	0	0	5.31	0.0857	0	0.098496	0	0	F51	批发业	广东省	440000	深圳市	440300
25	2018	0.106759	10.6759	1	2.19722	0.0307619	0	0	0	6.82	0.0679	1	0.101459	0	0	F51	批发业	广东省	440000	深圳市	440300
25	2019	0.110799	11.0799	1	1.94591	0.0307217	0	0	0	7.69	0.0651	1	0.218261	0.693147	0	F51	批发业	广东省	440000	深圳市	440300
25	2020	0.0987461	9.87461	1	1.09861	0.0302191	0	0	0	10.26	0.0697	1	0.033925	0	0	F51	批发业	广东省	440000	深圳市	440300
25	2021	0.10399	10.399	2	0.693147	0.0266661	0	0	0	9.4	0.0588	1	0.052392	0	0	F51	批发业	广东省	440000	深圳市	440300
25	2022	0.096577	9.6577	2	0	0.0223151	0.63	0	0	9.78	0.046	1	0.13659	0	0	F51	批发业	广东省	440000	深圳市	440300
25	2023	0.0472863	4.72863	2	0.693147	0.001629	3.97	0	0	21.19	0.0328	0	0.04519	0	0	F51	批发业	广东省	440000	深圳市	440300
26	2011	0.111241	11.1241	1	1.38629	0.0128	0	0	0	0.84	0.0562	1	0.082473	0	3.04452	F52	零售业	广东省	440000	深圳市	440300
26	2012	0.0963243	9.63243	1	0.693147	0.0110467	0	0	0	0.92	0.0955	1	0.014328	0	1.79176	F52	零售业	广东省	440000	深圳市	440300
26	2013	0.108166	10.8166	1	1.09861	0.0101634	0	0	0	0.95	0.0862	1	0.061925	0	2.89037	F52	零售业	广东省	440000	深圳市	440300
26	2014	0.113821	11.3821	1	1.60944	0.009706	0	0	0	0.97	0.0885	1	0.063465	0	2.89037	F52	零售业	广东省	440000	深圳市	440300
26	2015	0.100629	10.0629	1	1.79176	0.0085784	0.7	0	0	1.06	0.0852	1	0.407185	0	0.693147	F52	零售业	广东省	440000	深圳市	440300
26	2016	0.173239	17.3239	1	2.19722	0.0096761	0.81	0.693147	16.6667	1.0962	0.1526	1	0.031317	0	1.94591	F52	零售业	广东省	440000	深圳市	440300
26	2017	0.211325	21.1325	1	2.70805	0.0123536	0.84	0.693147	33.3333	1.1	0.1463	1	0.039169	0	1.38629	F52	零售业	广东省	440000	深圳市	440300
26	2018	0.110057	11.0057	1	2.19722	0.012097	0.91	0	0	1.49	0.1182	1	0.041397	0	1.09861	F52	零售业	广东省	440000	深圳市	440300
26	2019	0.114876	11.4876	1	2.07944	0.0102932	1.1	0	0	1.44	0.0968	1	0.032838	0	2.07944	F52	零售业	广东省	440000	深圳市	440300
26	2020	0.120321	12.0321	1	2.3979	0.0094208	1.18	0	0	1.49	0.0878	1	0.054782	0	2.3979	F52	零售业	广东省	440000	深圳市	440300
26	2021	0.128425	12.8425	2	1.94591	0.0082799	2.52	0	0	1.79	0.085	1	0.07617	0	2.48491	F52	零售业	广东省	440000	深圳市	440300
26	2022	0.131638	13.1638	2	2.48491	0.0080639	2.66	0	0	1.78	0.0886	1	0.040883	0	2.07944	F52	零售业	广东省	440000	深圳市	440300
26	2023	0.0640508	6.40508	2	2.3979	0.0075315	2.81	0	0	1.82	0.0846	0	0.062932	0	2.63906	F52	零售业	广东省	440000	深圳市	440300
27	2011	0.061274	6.12741	3	0	0.056306	0	0	0	0	0.4528	0	0.030812	2.07944	0	D44	电力、热力生产和供应业	广东省	440000	深圳市	440300
27	2012	0.135872	13.5872	3	0	0.0938521	0	0	0	6.38	0.4173	1	0.037107	1.60944	0	D44	电力、热力生产和供应业	广东省	440000	深圳市	440300
27	2013	0.130836	13.0836	2	0	0.0882055	0	0	0	6.4321	0.412	1	0.073543	2.3979	0	D44	电力、热力生产和供应业	广东省	440000	深圳市	440300
27	2014	0.141922	14.1922	3	0	0.0884652	0	0	0	6.74	0.3791	1	0.080423	2.48491	0	D44	电力、热力生产和供应业	广东省	440000	深圳市	440300
27	2015	0.149541	14.9541	3	0.693147	0.0645106	3.79	0	0	6.11	0.3154	1	0.221733	2.70805	0	D44	电力、热力生产和供应业	广东省	440000	深圳市	440300
27	2016	0.152746	15.2746	3	0.693147	0.0642507	3.68	0	0	5.83	0.3348	1	-0.001617	3.04452	0	D44	电力、热力生产和供应业	广东省	440000	深圳市	440300
27	2017	0.153497	15.3497	3	0.693147	0.0527984	3.51	0	0	5.49	0.394	1	-0.004232	2.99573	0	D44	电力、热力生产和供应业	广东省	440000	深圳市	440300
27	2018	0.0911246	9.11246	3	1.38629	0.0499295	3.87	0	0	5.52	0.4072	0	0.111681	2.99573	0	D44	电力、热力生产和供应业	广东省	440000	深圳市	440300
27	2019	0.0703294	7.03294	3	0	0.0521139	3.98	0	0	5.38	0.3719	0	0.221994	2.48491	0	D44	电力、热力生产和供应业	广东省	440000	深圳市	440300
27	2020	0.0869573	8.69573	3	1.38629	0.118643	3.87	0	0	5.62	0.3094	0	0.246205	2.48491	0	D44	电力、热力生产和供应业	广东省	440000	深圳市	440300
27	2021	0.0754144	7.54144	2	1.09861	0.124681	3.75	0	0	3.49	0.4376	0	0.184776	2.48491	0	D44	电力、热力生产和供应业	广东省	440000	深圳市	440300
27	2022	0.0774041	7.74041	2	1.60944	0.128643	3.56	0	0	3.92	0.4197	0	0.089691	2.07944	0	D44	电力、热力生产和供应业	广东省	440000	深圳市	440300
27	2023	0.107389	10.7389	5	1.38629	0.130676	4.37	0	0	4.58	0.3759	0	0.027739	1.94591	0	D44	电力、热力生产和供应业	广东省	440000	深圳市	440300
28	2011	0.0912936	9.12936	1	0.693147	0.0155991	0	0	0	2.86	0.0782	1	0.261042	0.693147	0	F51	批发业	广东省	440000	深圳市	440300
28	2012	0.0779348	7.79348	1	0	0.0166908	0	0	0	3.02	0.0743	1	0.289046	0	0	F51	批发业	广东省	440000	深圳市	440300
28	2013	0.0994571	9.94571	1	1.94591	0.0136158	0	0	0	3.6215	0.0693	1	0.259691	0	0	F51	批发业	广东省	440000	深圳市	440300
28	2014	0.121396	12.1396	3	1.94591	0.0112545	0	0	0	3.57	0.0581	1	1.09408	0	0	F51	批发业	广东省	440000	深圳市	440300
28	2015	0.1077	10.77	1	1.94591	0.0104189	2.02	0	0	4.13	0.0817	1	0.147439	0.693147	0	F51	批发业	广东省	440000	深圳市	440300
28	2016	0.134999	13.4999	3	1.60944	0.0150349	13.9	0	0	0.5898	0.0229	1	0.132407	1.38629	0	F51	批发业	广东省	440000	深圳市	440300
28	2017	0.144375	14.4375	5	2.3979	0.0145792	0	0	0	0.64	0.0247	1	0.113226	0	0	F51	批发业	广东省	440000	深圳市	440300
28	2018	0.107225	10.7225	1	2.30259	0.0110337	0	0	0	0.62	0.021	1	0.400733	1.09861	0	F51	批发业	广东省	440000	深圳市	440300
28	2019	0.107018	10.7018	1	2.07944	0.0095448	0	0	0	0.6	0.0183	1	0.104565	1.38629	0	F51	批发业	广东省	440000	深圳市	440300
28	2020	0.105017	10.5017	1	2.07944	0.0185466	0	0	0	0.43	0.0216	1	0.084413	1.09861	0	F51	批发业	广东省	440000	深圳市	440300
28	2021	0.116067	11.6067	1	2.70805	0.0156585	0	0	0	0.49	0.0203	1	0.067121	1.60944	0	F51	批发业	广东省	440000	深圳市	440300
28	2022	0.0411889	4.11889	1	2.48491	0.0151943	0.12	0	0	0.48	0.0199	0	0.07893	1.38629	0	F51	批发业	广东省	440000	深圳市	440300
28	2023	0.043628	4.3628	1	2.70805	0.0129404	0.32	0	0	0.53	0.0182	0	0.078846	1.38629	0	F51	批发业	广东省	440000	深圳市	440300
29	2011	0.0008809	1.22037	1	0	0.0019147	0	0	0	0	0.0188	0	0.077336	0	0	K70	房地产业	广东省	440000	深圳市	440300
29	2012	0.0066872	1.22037	1	0	0.00158	0	0	0	0	0.017	0	0.076272	0.693147	0	K70	房地产业	广东省	440000	深圳市	440300
29	2013	0.0006923	1.22037	1	0	0.0016022	0	0	0	0	0.0144	0	0.151212	0	0	K70	房地产业	广东省	440000	深圳市	440300
29	2014	0.0006038	1.22037	1	0	0.0014174	0	0	0	0	0.0124	0	0.171815	0	0	K70	房地产业	广东省	440000	深圳市	440300
29	2015	0.0023918	1.22037	1	0	0.0013528	0	0	0	1.57	0.0125	0	0.083785	0	0	K70	房地产业	广东省	440000	深圳市	440300
29	2016	0.0020892	1.22037	1	0	0.0013594	0	0	0	1.32	0.012	0	0.141832	0	0	K70	房地产业	广东省	440000	深圳市	440300
29	2017	0.0019009	1.22037	1	0	1.38e-05	0	0	0	1.31	0.0095	0	0.073155	0	0	K70	房地产业	广东省	440000	深圳市	440300
29	2018	0.0020109	1.22037	1	0	0	0	0	0	1.48	0.0073	0	0.185448	0	0	K70	房地产业	广东省	440000	深圳市	440300
29	2019	0.0020564	1.22037	1	0	0	0	0	0	1.56	0.0062	0	0.101304	0	0	K70	房地产业	广东省	440000	深圳市	440300
29	2020	0.0723422	7.23422	1	0	0	0	0	0	1.32	0.0057	1	0.037476	0	0	K70	房地产业	广东省	440000	深圳市	440300
29	2021	0.0944692	9.44692	3	0	0	0	0	0	1.01	0.0039	1	0.155928	0	0	K70	房地产业	广东省	440000	深圳市	440300
29	2022	0.102809	10.2809	3	0	0	0	0	0	8.33	0.0038	1	0.014007	0	0	K70	房地产业	广东省	440000	深圳市	440300
29	2023	0.0442232	4.42232	4	0	0	0	0	0	8.99	0.0031	0	-0.11907	0	0	K70	房地产业	广东省	440000	深圳市	440300
30	2013	0.0709244	7.09244	1	0	0.0422886	0	0.693147	10	1.7266	0.1943	0	0.131234	0	2.3979	C41	其他制造业	吉林省	220000	长春市	220100
30	2014	0.06448	6.448	1	0	0.0347448	0	0.693147	5.55556	1.77	0.1893	0	0.121074	0	2.94444	C36	汽车制造业	吉林省	220000	长春市	220100
30	2015	0.0412435	4.12435	1	0	0.0341987	12.8	0	0	1.88	0.219	0	0.113953	0	2.70805	C36	汽车制造业	吉林省	220000	长春市	220100
30	2016	0.0947237	9.47237	1	0.693147	0.0327163	12.9	0.693147	14.2857	2.1075	0.1909	0	0.088605	0	2.07944	C36	汽车制造业	吉林省	220000	长春市	220100
30	2017	0.0525501	5.25501	1	1.79176	0.0286178	13	0	0	2.18	0.1711	0	0.095147	0	1.79176	C36	汽车制造业	吉林省	220000	长春市	220100
30	2018	0.0487013	4.87013	1	1.79176	0.0389084	12.61	0	0	2.18	0.1907	0	0.127046	0	1.09861	C36	汽车制造业	吉林省	220000	长春市	220100
30	2019	0.0568123	5.68123	1	1.79176	0.0361397	13	0	0	2.66	0.1815	0	0.045702	0	2.19722	C36	汽车制造业	吉林省	220000	长春市	220100
30	2020	0.0679712	6.79712	1	3.04452	0.0469404	13	0	0	2.84	0.1704	0	0.110148	0	1.79176	C36	汽车制造业	吉林省	220000	长春市	220100
30	2021	0.0900314	9.00314	1	3.55535	0.0460887	12.7	0	0	3.21	0.2013	0	0.028687	0.693147	3.09104	C36	汽车制造业	吉林省	220000	长春市	220100
30	2022	0.0760065	7.60065	1	3.2581	0.0422928	12.8	0	0	3.42	0.1922	0	-0.004854	0.693147	1.60944	C36	汽车制造业	吉林省	220000	长春市	220100
30	2023	0.0907663	9.07663	2	3.33221	0.0353141	14.5	0	0	4.62	0.1713	0	0.039029	0.693147	1.79176	C36	汽车制造业	吉林省	220000	长春市	220100
31	2011	0.0397234	3.97234	3	0	0.0008555	0	0	0	9.64	0.0052	0	0.06558	0.693147	0	K70	房地产业	广东省	440000	深圳市	440300
31	2012	0.0926604	9.26604	2	0	0.0009086	0	0	0	8.97	0.0125	1	0.064245	0	0	K70	房地产业	广东省	440000	深圳市	440300
31	2013	0.0923812	9.23812	2	0	0.0014745	0	0	0	8.622	0.0146	1	0.162965	0	0	K70	房地产业	广东省	440000	深圳市	440300
31	2014	0.080202	8.0202	1	0	0.0013337	0	0	0	7.9	0.0127	1	0.188915	0	0	K70	房地产业	广东省	440000	深圳市	440300
31	2015	0.112424	11.2424	2	1.79176	0.0006245	0	0	0	9.27	0.0102	1	0.039462	0	0	K70	房地产业	广东省	440000	深圳市	440300
31	2016	0.100967	10.0967	2	0.693147	0.0009295	0	0	0	9.7054	0.0103	1	0.004655	0	0	K70	房地产业	广东省	440000	深圳市	440300
31	2017	0.125487	12.5487	3	1.60944	0.0007175	0	0	0	12.67	0.0075	1	0.040492	0	0	K70	房地产业	广东省	440000	深圳市	440300
31	2018	0.116963	11.6963	2	1.94591	0.0005849	0	0	0	11.92	0.006	1	0.171585	0	0	K70	房地产业	广东省	440000	深圳市	440300
31	2019	0.122468	12.2468	2	2.19722	0.0103328	0	0	0	13.27	0.0231	1	0.191437	0	0	K70	房地产业	广东省	440000	深圳市	440300
31	2020	0.134931	13.4931	3	2.07944	0.0090763	0	0	0	15.6	0.0203	1	0.074437	0	0	K70	房地产业	广东省	440000	深圳市	440300
31	2021	0.136547	13.6547	3	1.79176	0.0080986	0	0	0	14.74	0.0175	1	0.141193	0.693147	0	K70	房地产业	广东省	440000	深圳市	440300
31	2022	0.139201	13.9201	4	1.38629	0.0077058	0	0	0	16.29	0.0164	1	-0.088054	0	0	K70	房地产业	广东省	440000	深圳市	440300
31	2023	0.077994	7.7994	4	1.38629	0.0079779	0	0	0	16.29	0.0167	0	-0.029666	1.09861	0	K70	房地产业	广东省	440000	深圳市	440300
32	2011	0.0433952	4.33951	1	1.94591	0.198064	0	0	0	0	0.0787	0	0.017481	0	1.09861	C39	计算机、通信和其他电子设备制造业	广东省	440000	深圳市	440300
32	2012	0.0539627	5.39627	1	2.56495	0.178342	0	0	0	2.29	0.0611	0	0.205841	0.693147	0.693147	C39	计算机、通信和其他电子设备制造业	广东省	440000	深圳市	440300
32	2013	0.0533817	5.33817	1	2.94444	0.193851	0	0	0	2.2932	0.044	0	-0.031904	0.693147	0	C39	计算机、通信和其他电子设备制造业	广东省	440000	深圳市	440300
32	2014	0.0445433	4.45433	1	2.56495	0.105664	0	0	0	2.6316	0.0417	0	0.469999	0.693147	0	C39	计算机、通信和其他电子设备制造业	广东省	440000	深圳市	440300
32	2015	0.0510171	5.10171	1	2.19722	0.135396	5.95	0	0	3.54	0.0419	0	0.010997	1.09861	0	F51	批发业	广东省	440000	深圳市	440300
32	2016	0.147742	14.7742	4	2.19722	0.139252	9.18	0.693147	12.5	3.9041	0.0531	0	0.027264	0.693147	2.19722	F51	批发业	广东省	440000	深圳市	440300
32	2017	0.0918549	9.18549	4	2.94444	0.133312	9.04	0	0	3.65	0.0438	0	0.01235	0.693147	0	F51	批发业	广东省	440000	深圳市	440300
32	2018	0.105733	10.5733	4	3.4012	0.113738	9.85	0	0	7.88	0.0357	0	-0.093903	0.693147	0.693147	F51	批发业	广东省	440000	深圳市	440300
32	2019	0.0979943	9.79943	3	3.46574	0.101434	20.02	0	0	8.78	0.037	0	0.093752	0.693147	0	F51	批发业	广东省	440000	深圳市	440300
32	2020	0.101648	10.1648	3	3.71357	0.0870669	29.83	0	0	9.45	0.0317	0	0.090035	0	0	F51	批发业	广东省	440000	深圳市	440300
32	2021	0.198426	19.8426	3	4.43082	0.0241301	11	0	0	10.75	0.0958	1	0.31488	3.13549	0.693147	E49	建筑安装业	广东省	440000	深圳市	440300
32	2022	0.19144	19.144	3	4.41884	0.0203323	11.57	0	0	9.27	0.083	1	0.042009	2.56495	0.693147	E49	建筑安装业	广东省	440000	深圳市	440300
32	2023	0.128637	12.8637	3	4.92725	0.0194897	18.07	0	0	10.25	0.087	0	0.172343	2.70805	0	E49	建筑安装业	广东省	440000	深圳市	440300
34	2011	0.0092822	1.22037	1	0	0.0399518	0	0	0	0	0.1773	0	0.291385	0	0	S90	综合	广东省	440000	深圳市	440300
34	2012	0.0241857	2.41857	1	0	0.0451079	0	0	0	0.91	0.3727	0	0.047064	0.693147	0	S90	综合	广东省	440000	深圳市	440300
34	2013	0.0307751	3.07751	2	1.09861	0.0130251	0	0	0	0.92	0.145	0	0.187717	0	0	S90	综合	广东省	440000	深圳市	440300
34	2014	0.0525914	5.25914	4	1.09861	0.0102675	0	0	0	1.02	0.1272	0	0.56133	0	0	S90	综合	广东省	440000	深圳市	440300
34	2015	0.0416808	4.16808	4	0	0.010134	1.39	0	0	1.18	0.1245	0	0.128977	0	0	S90	综合	广东省	440000	深圳市	440300
34	2016	0.140743	14.0743	3	3.58352	0.0030883	0	0	0	6.5449	0.0126	1	13.1747	0	0	F51	批发业	广东省	440000	深圳市	440300
34	2017	0.130098	13.0098	1	3.93183	0.105685	4.66	0	0	6.08	0.0078	1	0.266785	0	0	F51	批发业	广东省	440000	深圳市	440300
34	2018	0.138301	13.8301	1	4.66344	0.0979823	5.32	0	0	6.29	0.0066	1	0.145528	0	0	F51	批发业	广东省	440000	深圳市	440300
34	2019	0.13809	13.809	1	4.59512	0.0832945	7.74	0	0	6	0.0052	1	0.137366	0	0	F51	批发业	广东省	440000	深圳市	440300
34	2020	0.143539	14.3539	1	4.86754	0.0766904	9.96	0	0	7.05	0.0065	1	0.074956	0	0	F51	批发业	广东省	440000	深圳市	440300
34	2021	0.164587	16.4587	3	4.72739	0.0587329	11.38	0	0	7.11	0.005	1	0.406911	0	0	F51	批发业	广东省	440000	深圳市	440300
34	2022	0.164459	16.4459	3	4.7362	0.005899	14.98	0	0	7.27	0.0048	1	0.235011	0	0	F51	批发业	广东省	440000	深圳市	440300
34	2023	0.0975903	9.75903	3	4.70953	0.013564	19.36	0	0	7.39	0.0114	0	0.12646	0	0	F51	批发业	广东省	440000	深圳市	440300
35	2014	0.0991866	9.91866	1	0	0.200229	0	0	0	3.05	0	1	0.827231	1.60944	0	N77	生态保护和环境治理业	江苏省	320000	南通市	320600
35	2015	0.154497	15.4497	3	0	0.4086	2.94	0	0	5.73	0.1627	1	0.140672	1.79176	1.09861	N77	生态保护和环境治理业	江苏省	320000	南通市	320600
35	2016	0.448431	36.9914	3	1.09861	0.291031	4.96	1.94591	100	6.04	0.1726	1	0.114617	2.3979	1.94591	N77	生态保护和环境治理业	江苏省	320000	南通市	320600
35	2017	0.417795	36.9914	3	2.83321	0.265939	1.71	0.693147	100	2.98	0.1322	1	0.478031	2.89037	0.693147	N77	生态保护和环境治理业	江苏省	320000	南通市	320600
35	2018	0.170947	17.0947	3	2.70805	0.321533	1.73	0	0	1.48	0.1504	1	0.080742	2.48491	0	N77	生态保护和环境治理业	江苏省	320000	南通市	320600
35	2019	0.156442	15.6441	3	1.94591	0.225867	0.5	0	0	0.65	0.1586	1	2.55242	2.56495	0	N77	生态保护和环境治理业	江苏省	320000	海安市	320685
35	2020	0.151645	15.1645	3	1.38629	0.221466	0.34	0	0	0.54	0.1612	1	0.067591	2.77259	0	N77	生态保护和环境治理业	江苏省	320000	海安市	320685
35	2021	0.189925	18.9926	4	2.70805	0.443333	1.81	0	0	1.46	0.0818	1	-0.107456	2.89037	0	N77	生态保护和环境治理业	江苏省	320000	海安市	320685
35	2022	0.126046	12.6046	1	2.19722	0.505004	1.61	0.693147	8.33333	0.94	0.0744	0	-0.06401	1.38629	2.56495	N77	生态保护和环境治理业	江苏省	320000	海安市	320685
35	2023	0.154176	15.4176	2	1.38629	0.495846	1.86	1.09861	15.3846	0.94	0.0957	0	0.038174	1.09861	2.63906	N77	生态保护和环境治理业	江苏省	320000	海安市	320685
36	2011	0.0120765	1.22037	1	0.693147	0.002401	0	0	0	2.7	0.0324	0	0.057024	0	0	K70	房地产业	广东省	440000	深圳市	440300
36	2012	0.011869	1.22037	1	0.693147	0.0017514	0	0	0	2.84	0.024	0	0.057466	0	0	K70	房地产业	广东省	440000	深圳市	440300
36	2013	0.082312	8.2312	1	0.693147	0.0015325	0	0	0	2.6923	0.0251	1	0.043366	0	0	K70	房地产业	广东省	440000	深圳市	440300
36	2014	0.0873518	8.73518	2	0	0.0014801	0	0	0	2.52	0.0638	1	-0.017007	0	0	K70	房地产业	广东省	440000	深圳市	440300
36	2015	0.0865466	8.65466	1	1.09861	0.0009567	0	0	0	1.91	0.0439	1	0.076065	0	0	K70	房地产业	广东省	440000	深圳市	440300
36	2016	0.0880986	8.80986	1	1.09861	0.0009556	0	0	0	1.36	0.099	1	0.500077	0	0	K70	房地产业	广东省	440000	深圳市	440300
36	2017	0.101638	10.1638	1	2.30259	0.0008933	0	0	0	1.48	0.1064	1	0.262864	0	0	K70	房地产业	广东省	440000	深圳市	440300
36	2018	0.0831322	8.31322	1	0.693147	0.0005608	0	0	0	1.68	0.0767	1	0.070304	0	0	K70	房地产业	广东省	440000	深圳市	440300
36	2019	0.0052853	1.22037	1	0	0.0003944	0	0	0	2.27	0.0672	0	0.037887	0	0	K70	房地产业	广东省	440000	深圳市	440300
36	2020	0.0231699	2.31699	1	1.60944	0.0003407	0	0	0	2.36	0.0734	0	0.031766	0	0	K70	房地产业	广东省	440000	深圳市	440300
36	2021	0.0333509	3.33509	3	0	0.0003152	0	0	0	1.47	0.0809	0	0.031967	0.693147	0	K70	房地产业	广东省	440000	深圳市	440300
36	2022	0.105565	10.5565	3	0.693147	0.0003084	0	0	0	1.42	0.0817	1	0.041242	0	0	K70	房地产业	广东省	440000	深圳市	440300
36	2023	0.0276607	2.76607	3	0	0.0003279	0	0	0	1.42	0.0876	0	-0.008755	0	0	K70	房地产业	广东省	440000	深圳市	440300
37	2011	0.0398654	3.98654	1	0	0.0117019	0	0	0	8.26	0.4084	0	-0.023104	1.60944	0	D44	电力、热力生产和供应业	广东省	440000	深圳市	440300
37	2012	0.0302939	3.02939	1	0	0.0112845	0	0	0	8.1	0.3685	0	-0.087403	0.693147	0	D44	电力、热力生产和供应业	广东省	440000	深圳市	440300
37	2013	0.0348335	3.48335	1	0	0.0108312	0	0	0	7.6433	0.3478	0	0.044676	1.38629	0	D44	电力、热力生产和供应业	广东省	440000	深圳市	440300
37	2014	0.0236551	2.36551	1	0	0.0111787	0	0	0	7.62	0.3638	0	-0.234269	0	0	D44	电力、热力生产和供应业	广东省	440000	深圳市	440300
37	2015	0.026049	2.6049	1	0	0.0117474	0	0	0	4.52	0.3641	0	-0.601704	0.693147	0	D44	电力、热力生产和供应业	广东省	440000	深圳市	440300
37	2017	0.0393161	3.93161	1	0	0.0168078	0	0	0	4.62	0.4926	0	0.000186	1.60944	0	D44	电力、热力生产和供应业	广东省	440000	深圳市	440300
37	2018	0.0427552	4.27553	1	0	0.0139054	0	0	0	4.23	0.425	0	0.006152	2.3979	0	D44	电力、热力生产和供应业	广东省	440000	深圳市	440300
37	2019	0.113743	11.3743	1	0	0.0135442	0	0	0	4.46	0.4292	1	0.012614	2.3979	0	D44	电力、热力生产和供应业	广东省	440000	深圳市	440300
37	2020	0.113269	11.3269	1	0	0.0069933	8.68	0	0	5.46	0.3065	1	0.012243	2.07944	0	D44	电力、热力生产和供应业	广东省	440000	深圳市	440300
37	2021	0.220379	22.0379	2	0	0.0073354	18.37	1.38629	15	5.36	0.2306	1	-0.243996	1.79176	3.04452	D44	电力、热力生产和供应业	广东省	440000	深圳市	440300
37	2022	0.279815	27.9815	2	1.09861	0.007597	18.59	1.60944	33.3333	5.24	0.2269	1	-0.117543	2.30259	2.56495	D44	电力、热力生产和供应业	广东省	440000	深圳市	440300
37	2023	0.137612	13.7612	2	0	0.0094105	30.63	0.693147	14.2857	8.8	0.2789	0	-0.00144	1.94591	2.07944	D44	电力、热力生产和供应业	广东省	440000	深圳市	440300
38	2021	0.128192	12.8192	2	3.29584	0.011705	6.34	0	0	0	0.0053	1	-0.230358	0	0.693147	L72	商务服务业	广东省	440000	深圳市	440300
39	2011	0.165441	16.5441	3	0	0.0492874	0	0.693147	1.96078	1.06	0.1691	1	0.125319	1.09861	3.95124	C33	金属制品业	广东省	440000	深圳市	440300
39	2012	0.203521	20.3521	2	0	0.0519706	0	1.60944	11.1111	1.31	0.1843	1	0.023295	1.60944	3.61092	C33	金属制品业	广东省	440000	深圳市	440300
39	2013	0.139462	13.9462	3	0	0.0509596	0	0	0	1.64	0.186	1	0.107562	1.60944	2.89037	C33	金属制品业	广东省	440000	深圳市	440300
39	2014	0.177014	17.7014	1	0.693147	0.0496243	0	0.693147	16.6667	1.7169	0.217	1	0.113732	1.79176	1.94591	C33	金属制品业	广东省	440000	深圳市	440300
39	2015	0.15843	15.843	4	1.60944	0.0466786	5.9	0	0	2	0.2046	1	0.301031	1.09861	1.38629	C33	金属制品业	广东省	440000	深圳市	440300
39	2016	0.152727	15.2728	4	1.60944	0.0373532	6.6	0	0	2.3	0.1768	1	0.095571	1.09861	0.693147	C33	金属制品业	广东省	440000	深圳市	440300
39	2017	0.151348	15.1348	3	2.30259	0.0360726	6.69	0	0	2.25	0.1757	1	0.104834	1.38629	0.693147	C33	金属制品业	广东省	440000	深圳市	440300
39	2018	0.172194	17.2194	4	2.77259	0.0293349	6.63	0	0	2.38	0.1459	1	0.211982	2.07944	0.693147	C33	金属制品业	广东省	440000	深圳市	440300
39	2019	0.167844	16.7844	4	2.89037	0.029967	6.84	0	0	2.55	0.2199	1	0.050283	1.60944	0	C33	金属制品业	广东省	440000	深圳市	440300
39	2020	0.18053	18.053	4	2.70805	0.0329124	8.79	0	0	2.94	0.2415	1	-0.021515	2.07944	1.09861	C33	金属制品业	广东省	440000	深圳市	440300
39	2021	0.184922	18.4922	5	2.83321	0.0294432	8.82	0	0	3.21	0.2268	1	0.058051	2.07944	0	C33	金属制品业	广东省	440000	深圳市	440300
39	2022	0.193766	19.3766	6	2.70805	0.0296877	9.68	0	0	3.27	0.2687	1	0.099614	1.09861	0.693147	C33	金属制品业	广东省	440000	深圳市	440300
39	2023	0.126371	12.6371	6	3.09104	0.0363121	11.25	0	0	3.91	0.2495	0	0.03151	1.38629	0	C33	金属制品业	广东省	440000	深圳市	440300
40	2011	0.0046356	1.22037	1	0	0.0151643	0	0	0	1.9	0.04	0	0.115646	0	0	K70	房地产业	广东省	440000	深圳市	440300
40	2012	0.0740846	7.40846	1	0	0.0049734	0	0	0	1.71	0.0314	1	0.18175	0	0	K70	房地产业	广东省	440000	深圳市	440300
40	2013	0.0792812	7.92812	1	0	0.0035484	0	0	0	1.6221	0.0183	1	0.075293	0.693147	0	K70	房地产业	广东省	440000	深圳市	440300
40	2014	0.0733363	7.33364	1	0	0.0031406	0	0	0	1.66	0.0166	1	0.012831	0	0	K70	房地产业	广东省	440000	深圳市	440300
40	2015	0.0888151	8.88151	1	0.693147	0.0025046	0	0	0	8.87	0.0099	1	0.044951	0	0	K70	房地产业	广东省	440000	深圳市	440300
40	2016	0.0816123	8.16123	1	0	0.0016907	4.96	0	0	5.82	0.0116	1	7.27106	0	0	K70	房地产业	广东省	440000	深圳市	440300
40	2017	0.110154	11.0154	1	1.09861	0.0022119	5.14	0	0	7.19	0.0947	1	0.054318	1.38629	0	E48	土木工程建筑业	广东省	440000	深圳市	440300
40	2018	0.144014	14.4014	2	2.19722	0.0040381	9.58	0	0	7.02	0.1638	1	0.260541	1.94591	0	D44	电力、热力生产和供应业	广东省	440000	深圳市	440300
40	2019	0.13545	13.545	2	1.38629	0.0049479	14.06	0	0	7.72	0.1879	1	-0.072103	1.38629	0	D44	电力、热力生产和供应业	广东省	440000	深圳市	440300
40	2020	0.157833	15.7833	3	1.94591	0.0057783	19.4	0	0	8.21	0.2015	1	-0.098023	1.38629	0	D44	电力、热力生产和供应业	广东省	440000	深圳市	440300
40	2021	0.179663	17.9662	4	2.30259	0.0039163	26.59	0	0	9.41	0.2064	1	-0.050282	1.38629	0	D44	电力、热力生产和供应业	广东省	440000	深圳市	440300
40	2022	0.179024	17.9024	5	2.07944	0.0038131	15.43	0	0	6.33	0.2122	1	-0.027655	1.60944	0	D44	电力、热力生产和供应业	广东省	440000	深圳市	440300
42	2011	0.0742674	7.42674	1	0	0.0009745	0	0	0	2.69	0.0135	1	0.060216	0	0	K70	房地产业	广东省	440000	深圳市	440300
42	2012	0.0743874	7.43874	1	0	0.0008602	0	0	0	2.94	0.0094	1	0.147706	0	0	K70	房地产业	广东省	440000	深圳市	440300
42	2013	0.0744528	7.44528	1	0	0.0008263	0	0	0	2.9566	0.0107	1	0.056813	0	0	K70	房地产业	广东省	440000	深圳市	440300
42	2014	0.0752801	7.52801	1	0	0.0003849	0	0	0	3.9	0.005	1	0.076245	0	0	K70	房地产业	广东省	440000	深圳市	440300
42	2015	0.0841601	8.41601	1	0.693147	0.0003276	0	0	0	3.18	0.0592	1	0.697797	0	0	K70	房地产业	广东省	440000	深圳市	440300
42	2016	0.0772506	7.72506	1	0	0.0002637	0	0	0	4.09	0.0498	1	0.043617	0	0	K70	房地产业	广东省	440000	深圳市	440300
42	2017	0.0963421	9.63421	2	0	0.0001501	0	0	0	3.37	0.0319	1	0.174483	1.09861	0	K70	房地产业	广东省	440000	深圳市	440300
42	2018	0.103992	10.3992	2	0.693147	9.33e-05	0	0	0	3.62	0.0272	1	0.113669	1.09861	0	K70	房地产业	广东省	440000	深圳市	440300
42	2019	0.0847042	8.47042	1	0	5.95e-05	0	0	0	3.3	0.0249	1	0.045196	1.09861	0	K70	房地产业	广东省	440000	深圳市	440300
42	2020	0.0108308	1.22037	1	0	3.55e-05	0	0	0	3.46	0.0243	0	0.02297	0.693147	0	K70	房地产业	广东省	440000	深圳市	440300
42	2021	0.0338344	3.38344	3	0	3.3e-05	0.77	0	0	3.34	0.0252	0	0.003855	0.693147	0	K70	房地产业	广东省	440000	深圳市	440300
42	2022	0.0331768	3.31768	3	0	5.74e-05	0.74	0	0	2.74	0.0264	0	-0.001501	0.693147	0	K70	房地产业	广东省	440000	深圳市	440300
42	2023	0.0329825	3.29825	3	0	5.5e-05	0.82	0	0	2.41	0.0298	0	-0.321324	0.693147	0	K70	房地产业	广东省	440000	深圳市	440300
45	2011	0.0162674	1.62674	1	0	0.0257538	0	0	0	3.34	0.2788	0	0.017578	0	0	S90	综合	广东省	440000	深圳市	440300
45	2012	0.0335014	3.35014	1	0	0.0245459	0	0	0	2.53	0.5047	0	-0.048638	1.09861	0	F51	批发业	广东省	440000	深圳市	440300
45	2013	0.0366739	3.66739	2	0	0.0153863	0	0	0	2.6441	0.308	0	0.763488	1.09861	0	F51	批发业	广东省	440000	深圳市	440300
45	2014	0.0265708	2.65708	1	0	0.0147979	0	0	0	2.12	0.2922	0	-0.044214	1.38629	0	F51	批发业	广东省	440000	深圳市	440300
45	2015	0.0366736	3.66736	2	0	0.0136819	7.66	0	0	2.35	0.2661	0	-0.009871	0.693147	0	C39	计算机、通信和其他电子设备制造业	广东省	440000	深圳市	440300
45	2016	0.0258726	2.58726	1	0	0.0096366	8.44	0	0	2.5478	0.1757	0	0.581977	1.09861	0	C39	计算机、通信和其他电子设备制造业	广东省	440000	深圳市	440300
45	2017	0.116632	11.6632	2	0	0.0092643	10.2	0	0	2.62	0.1564	1	0.024098	2.07944	0	C39	计算机、通信和其他电子设备制造业	广东省	440000	深圳市	440300
45	2018	0.117932	11.7932	2	0	0.0082007	10.18	0	0	2.84	0.2139	1	-0.018035	1.94591	0	C39	计算机、通信和其他电子设备制造业	广东省	440000	深圳市	440300
45	2019	0.114584	11.4584	2	0	0.0080589	10.89	0	0	2.47	0.1993	1	0.114218	1.60944	0	C39	计算机、通信和其他电子设备制造业	广东省	440000	深圳市	440300
45	2020	0.109839	10.9839	2	0	0.007254	12.34	0	0	2.63	0.159	1	0.011596	1.09861	0	C39	计算机、通信和其他电子设备制造业	广东省	440000	深圳市	440300
45	2021	0.119256	11.9255	2	0	0.0087276	10.61	0	0	2.51	0.4317	1	0.016545	1.09861	0	C39	计算机、通信和其他电子设备制造业	广东省	440000	深圳市	440300
45	2022	0.123585	12.3585	2	0	0.0078675	12	0	0	2.79	0.3988	1	0.019283	1.60944	0	C39	计算机、通信和其他电子设备制造业	广东省	440000	深圳市	440300
45	2023	0.0598262	5.98262	2	0.693147	0.0070028	12.57	0	0	2.97	0.3657	0	0.020063	1.60944	0	C39	计算机、通信和其他电子设备制造业	广东省	440000	深圳市	440300
46	2011	0.0859435	8.59435	2	0	0.0001257	0	0	0	3.4	0.0044	1	0.015204	0	0	K70	房地产业	北京市	110000	北京市	110000
46	2012	0.092251	9.22509	1	0.693147	0.0001834	0	0	0	3.99	0.0045	1	0.057892	1.09861	0	K70	房地产业	北京市	110000	北京市	110000
46	2013	0.110218	11.0218	3	1.09861	0.0001823	0	0	0	4.334	0.0033	1	0.076841	0	0	K70	房地产业	北京市	110000	北京市	110000
46	2014	0.123031	12.3031	3	1.60944	0.0004741	0	0	0	10.52	0.0078	1	-0.035753	0	0	K70	房地产业	北京市	110000	北京市	110000
46	2015	0.121323	12.1323	2	2.56495	0.0005551	2.07	0	0	8.52	0.0058	1	0.183535	0	0	K70	房地产业	北京市	110000	北京市	110000
46	2016	0.128397	12.8397	2	2.30259	0.0005124	0	0	0	13.39	0.0053	1	0.378366	0.693147	0	K70	房地产业	北京市	110000	北京市	110000
46	2017	0.141368	14.1368	3	1.94591	0.0005569	0	0	0	15.26	0.0055	1	0.104522	1.09861	0	K70	房地产业	北京市	110000	北京市	110000
46	2018	0.133137	13.3138	2	2.19722	0.0004946	0	0	0	15.57	0.0044	1	0.033973	1.09861	0	K70	房地产业	北京市	110000	北京市	110000
46	2019	0.117301	11.7301	2	1.09861	0.0008242	0	0	0	15.15	0.0055	1	0.164509	0.693147	0	K70	房地产业	北京市	110000	北京市	110000
48	2012	0.0356292	3.56292	1	1.60944	0.0720665	0	0	0	3.12	0.2645	0	0.055739	0	0	C13	农副食品加工业	广东省	440000	深圳市	440300
48	2013	0.0435519	4.35519	1	2.07944	0.0959843	0	0	0	3.5197	0.2896	0	-0.020593	0	0	C13	农副食品加工业	广东省	440000	深圳市	440300
48	2014	0.0440493	4.40493	1	2.63906	0.070283	0	0	0	3.54	0.1835	0	0.250069	0	0	C13	农副食品加工业	广东省	440000	深圳市	440300
48	2015	0.109962	10.9962	1	2.07944	0.0657979	2.04	0	0	4.02	0.1748	1	0.326914	0	0	C13	农副食品加工业	广东省	440000	深圳市	440300
48	2016	0.111755	11.1755	1	2.3979	0.059257	1.94	0	0	2.77	0.1799	1	0.029556	0	0	C13	农副食品加工业	广东省	440000	深圳市	440300
48	2017	0.11428	11.428	1	1.79176	0.0273482	2.11	0	0	2.62	0.1597	1	-0.142014	1.38629	0	C13	农副食品加工业	广东省	440000	深圳市	440300
48	2019	0.102041	10.2041	1	1.09861	0.0071127	6.92	0	0	4.42	0.0781	1	0.940404	0.693147	0	C13	农副食品加工业	广东省	440000	深圳市	440300
48	2020	0.108017	10.8017	1	1.09861	0.0031514	2.3	0	0	5.44	0.0543	1	0.169697	1.79176	0	C13	农副食品加工业	广东省	440000	深圳市	440300
48	2021	0.114343	11.4343	2	0.693147	0.0033473	1.26	0	0	3.1	0.2155	1	-0.07985	1.38629	0	C13	农副食品加工业	广东省	440000	深圳市	440300
48	2022	0.118155	11.8155	2	1.09861	0.00273	1.4	0	0	2.6	0.275	1	0.040353	1.09861	0	C13	农副食品加工业	广东省	440000	深圳市	440300
48	2023	0.146797	14.6797	4	0.693147	0.0038474	1.96	0	0	2.38	0.499	1	0.467486	0.693147	0.693147	C13	农副食品加工业	广东省	440000	深圳市	440300
49	2011	0.091083	9.1083	1	1.38629	0.0187583	0	0	0	0.56	0.0926	1	0.535892	0	0	C38	电气机械及器材制造业	广东省	440000	深圳市	440300
49	2012	0.091562	9.1562	1	1.60944	0.0137306	0	0	0	0.22	0.0604	1	0.086141	0	0	C38	电气机械及器材制造业	广东省	440000	深圳市	440300
49	2013	0.0260803	2.60803	1	2.19722	0.0070811	0	0	0	0.2661	0.0352	0	0.40534	0	0	C38	电气机械及器材制造业	广东省	440000	深圳市	440300
49	2014	0.0927799	9.27799	1	1.79176	0.0099742	0	0	0	0.6105	0.0347	1	0.407913	0	0	C38	电气机械及器材制造业	广东省	440000	深圳市	440300
49	2015	0.100592	10.0592	1	1.94591	0.0137453	7.12	0	0	0.67	0.0523	1	0.304111	0	0	C38	电气机械及器材制造业	广东省	440000	深圳市	440300
49	2016	0.112396	11.2396	1	2.3979	0.0120805	8.93	0	0	0.7479	0.0441	1	0.25238	0.693147	0	C38	电气机械及器材制造业	广东省	440000	深圳市	440300
49	2017	0.112678	11.2678	1	2.3979	0.0077605	7.14	0	0	0.88	0.0867	1	0.210062	0.693147	0	C38	电气机械及器材制造业	广东省	440000	深圳市	440300
49	2018	0.116352	11.6352	1	2.77259	0.0063615	7.37	0	0	0.75	0.0778	1	0.247586	0.693147	0	C38	电气机械及器材制造业	广东省	440000	深圳市	440300
49	2019	0.0564535	5.64536	1	3.17805	0.0203918	9.13	0	0	0.7	0.0981	0	0.263445	1.09861	0	C38	电气机械及器材制造业	广东省	440000	深圳市	440300
49	2020	0.0601231	6.01231	1	3.49651	0.0238879	8.85	0	0	0.73	0.1026	0	-0.013602	1.09861	0	C38	电气机械及器材制造业	广东省	440000	深圳市	440300
49	2021	0.0705776	7.05776	2	3.29584	0.0220393	8.85	0	0	0.68	0.0791	0	0.215074	1.38629	0	C38	电气机械及器材制造业	广东省	440000	深圳市	440300
49	2022	0.0839233	8.39233	2	3.66356	0.0254468	11.78	0	0	1.17	0.1557	0	0.231836	1.79176	0	C38	电气机械及器材制造业	广东省	440000	深圳市	440300
49	2023	0.0775597	7.75597	2	3.29584	0.0264231	12.97	0	0	1.69	0.2071	0	0.509711	1.09861	0	C38	电气机械及器材制造业	广东省	440000	深圳市	440300
50	2011	0.131078	13.1078	1	0	0.0260285	0	0	0	2.55	0.5681	1	0.171933	1.09861	3.43399	C39	计算机、通信和其他电子设备制造业	广东省	440000	深圳市	440300
50	2012	0.139961	13.9961	2	0.693147	0.026361	0	0	0	3.44	0.5655	1	0.047005	0	3.21888	C39	计算机、通信和其他电子设备制造业	广东省	440000	深圳市	440300
50	2013	0.130862	13.0862	2	0	0.0253514	0	0	0	3.4764	0.4998	1	0.075132	0	3.3673	C39	计算机、通信和其他电子设备制造业	广东省	440000	深圳市	440300
50	2014	0.137771	13.7771	2	1.38629	0.0378508	0	0	0	4.55	0.4981	1	0.972588	0	1.94591	C39	计算机、通信和其他电子设备制造业	广东省	440000	深圳市	440300
50	2015	0.16213	16.213	2	2.63906	0.0442802	14.32	0	0	5.64	0.3165	1	0.547501	0	2.77259	C39	计算机、通信和其他电子设备制造业	广东省	440000	深圳市	440300
50	2016	0.179627	17.9627	2	3.13549	0.048185	16.78	0	0	5.2246	0.2891	1	0.038543	1.60944	2.48491	C39	计算机、通信和其他电子设备制造业	广东省	440000	深圳市	440300
50	2017	0.177342	17.7342	3	3.13549	0.0343677	13.09	0	0	4.24	0.2233	1	0.052027	1.09861	2.19722	C39	计算机、通信和其他电子设备制造业	广东省	440000	深圳市	440300
50	2018	0.16638	16.638	2	3.2581	0.0351856	13.07	0	0	3.58	0.4872	1	0.06203	1.09861	0.693147	C39	计算机、通信和其他电子设备制造业	广东省	440000	深圳市	440300
50	2019	0.172151	17.2151	2	3.4012	0.031642	16.21	0	0	4.69	0.4316	1	0.027014	0.693147	1.60944	C39	计算机、通信和其他电子设备制造业	广东省	440000	深圳市	440300
50	2020	0.174979	17.4979	2	2.94444	0.0294473	19.03	0	0	5.63	0.363	1	0.256901	0	3.49651	C39	计算机、通信和其他电子设备制造业	广东省	440000	深圳市	440300
50	2021	0.210067	21.0067	4	3.29584	0.0211591	23.3	0	0	7.19	0.3021	1	0.038854	0.693147	3.61092	C39	计算机、通信和其他电子设备制造业	广东省	440000	深圳市	440300
50	2022	0.211742	21.1742	4	3.04452	0.0279489	24.88	0	0	7.36	0.2843	1	0.004642	1.38629	3.2581	C39	计算机、通信和其他电子设备制造业	广东省	440000	深圳市	440300
50	2023	0.149452	14.9452	4	2.99573	0.0292954	25.68	0	0	7.11	0.5615	0	-0.041912	1.09861	3.2581	C39	计算机、通信和其他电子设备制造业	广东省	440000	深圳市	440300
55	2011	0.102442	10.2441	1	0	0.051125	0	0	0	0	0.1464	1	0.052753	1.09861	1.94591	C33	金属制品业	广东省	440000	深圳市	440300
55	2012	0.120265	12.0265	2	0	0.0439816	0	0	0	0.73	0.1467	1	0.005437	1.94591	1.79176	C33	金属制品业	广东省	440000	深圳市	440300
55	2013	0.102481	10.2481	1	0	0.0352089	0	0	0	1.2013	0.1781	1	0.049858	1.60944	1.09861	C33	金属制品业	广东省	440000	深圳市	440300
55	2014	0.101273	10.1273	1	0	0.0270147	0	0	0	1.1	0.1337	1	0.069455	2.07944	0.693147	C33	金属制品业	广东省	440000	深圳市	440300
55	2015	0.113722	11.3722	1	1.09861	0.0212948	15.08	0	0	1.08	0.1036	1	0.025765	1.60944	0	C33	金属制品业	广东省	440000	深圳市	440300
55	2016	0.116401	11.6401	1	1.38629	0.0088741	19.54	0	0	1.1069	0.0747	1	0.725816	1.38629	0	C33	金属制品业	广东省	440000	深圳市	440300
55	2017	0.0582614	5.82614	2	1.60944	0.0077202	18.6	0	0	1.12	0.0614	0	0.406819	1.38629	0	C33	金属制品业	广东省	440000	深圳市	440300
55	2018	0.0358112	3.58112	1	0.693147	0.0075349	18.31	0	0	0.91	0.0427	0	0.603978	1.38629	0	C33	金属制品业	广东省	440000	深圳市	440300
55	2019	0.059267	5.9267	2	2.19722	0.0068885	21	0	0	0.75	0.042	0	0.006933	0.693147	0	C33	金属制品业	广东省	440000	深圳市	440300
55	2020	0.131834	13.1834	2	2.07944	0.0065049	25.17	0	0	1.03	0.0407	1	0.041327	0.693147	0	C33	金属制品业	广东省	440000	深圳市	440300
55	2021	0.134699	13.4699	2	1.38629	0.0061331	19.03	0	0	0.91	0.0541	1	0.023927	2.3979	0	C33	金属制品业	广东省	440000	深圳市	440300
55	2022	0.145694	14.5694	2	2.56495	0.0057025	20.19	0	0	1.0628	0.0507	1	0.040989	2.07944	0	C33	金属制品业	广东省	440000	深圳市	440300
55	2023	0.0724734	7.24733	2	2.30259	0.0104717	21.5	0	0	1.33	0.0464	0	0.036838	1.94591	0	C33	金属制品业	广东省	440000	深圳市	440300
56	2014	0.0796839	7.96839	1	0.693147	0.0001887	0	0	0	1.06	0.0077	1	-0.156502	0	0	K70	房地产业	广东省	440000	深圳市	440300
56	2015	0.0727987	7.27987	1	0	0.0001922	0	0	0	1.64	0.0072	1	0.765825	0	0	K70	房地产业	广东省	440000	深圳市	440300
56	2016	0.0808242	8.08242	1	0.693147	0.00016	0	0	0	2.1442	0.0051	1	0.101703	0	0	K70	房地产业	广东省	440000	深圳市	440300
56	2017	0.0823557	8.23557	1	0.693147	0.0002288	0	0	0	3.53	0.0038	1	0.042633	0	0	K70	房地产业	广东省	440000	深圳市	440300
56	2018	0.0937848	9.37848	1	1.79176	0.000232	0	0	0	3.05	0.0039	1	-0.00628	0	0	K70	房地产业	广东省	440000	深圳市	440300
56	2019	0.0951122	9.51122	1	1.94591	0.0002042	0	0	0	2.75	0.0037	1	-0.043348	0	0	L72	商务服务业	广东省	440000	深圳市	440300
56	2020	0.0964814	9.64814	1	2.19722	0.0019614	0	0	0	1.46	0.0038	1	-0.129487	0	0	L72	商务服务业	广东省	440000	深圳市	440300
56	2021	0.107832	10.7832	3	1.09861	0.0020056	0	0	0	2.15	0.0036	1	-0.29978	0	0	L72	商务服务业	广东省	440000	深圳市	440300
56	2022	0.119336	11.9336	3	2.07944	0.0031554	0	0	0	2.55	0.0111	1	-0.379738	0	0	L72	商务服务业	广东省	440000	深圳市	440300
56	2023	0.0381476	3.81476	3	1.09861	0.0034531	0	0	0	2.55	0.0129	0	-0.539511	0	0	L72	商务服务业	广东省	440000	深圳市	440300
58	2011	0.118313	11.8313	1	3.66356	0.0003355	0	0	0	5.85	0.0274	1	0.126769	0	0	L71	租赁业	广东省	440000	深圳市	440300
58	2012	0.11967	11.9671	1	3.43399	0.0002604	0	0	0	9.33	0.0248	1	0.037825	0	0	L72	商务服务业	广东省	440000	深圳市	440300
58	2013	0.110464	11.0464	1	3.58352	0.0004154	0	0	0	0	0.0196	1	0.046219	0	0	L72	商务服务业	广东省	440000	深圳市	440300
58	2014	0.117884	11.7883	1	3.61092	0.0002465	0	0	0	6.39	0.0156	1	0.041482	0	0	L72	商务服务业	广东省	440000	深圳市	440300
58	2015	0.118325	11.8325	1	3.93183	0.0004374	0	0	0	3.74	0.0144	1	0.123699	0	0	L72	商务服务业	广东省	440000	深圳市	440300
58	2016	0.120585	12.0585	1	4.12713	0.0004913	0	0	0	3.8199	0.0154	1	0.046517	0	0	L72	商务服务业	广东省	440000	深圳市	440300
58	2017	0.0238633	2.38633	1	1.94591	0.0045522	0	0	0	1.77	0.0089	0	-0.101829	0	0	L72	商务服务业	广东省	440000	深圳市	440300
58	2018	0.0222184	2.22184	1	1.79176	0.0045555	0	0	0	1.82	0.0083	0	-0.050786	0	0	L72	商务服务业	广东省	440000	深圳市	440300
58	2019	0.0105758	1.22037	1	0.693147	0.0036887	0.54	0	0	1.75	0.01	0	0.024793	0	0	L72	商务服务业	广东省	440000	深圳市	440300
58	2020	0.0166941	1.66941	1	1.09861	0.0042918	0.57	0	0	2.14	0.0405	0	-0.011631	0	0	L72	商务服务业	广东省	440000	深圳市	440300
58	2021	0.0959141	9.59141	3	0	0.0044503	0.25	0	0	0.41	0.0471	1	0.037003	0	0	L72	商务服务业	广东省	440000	深圳市	440300
58	2022	0.0960422	9.60422	3	0	0.0043853	0.28	0	0	0.45	0.0488	1	-0.047013	0	0	L72	商务服务业	广东省	440000	深圳市	440300
58	2023	0.0321325	3.21325	3	0	0.0038948	0.45	0	0	0.51	0.0643	0	0.021412	0.693147	0	L72	商务服务业	广东省	440000	深圳市	440300
59	2011	0.0791161	7.91161	4	0	0.0517311	0	0	0	0.94	0.5991	0	0.140406	2.07944	0	C25	石油加工、炼焦及核燃料加工业	辽宁省	210000	盘锦市	211100
59	2012	0.0755937	7.55937	4	0	0.0515014	0	0	0	1.13	0.5667	0	-0.020929	1.79176	0	C25	石油加工、炼焦及核燃料加工业	辽宁省	210000	盘锦市	211100
59	2013	0.0747076	7.47076	4	0	0.0585745	0	0	0	0.5639	0.5898	0	-0.021277	1.60944	0	C25	石油加工、炼焦及核燃料加工业	辽宁省	210000	盘锦市	211100
59	2014	0.0603064	6.03064	3	0	0.0471113	0	0	0	0.64	0.5097	0	0.311005	1.09861	0.693147	C25	石油加工、炼焦及核燃料加工业	辽宁省	210000	盘锦市	211100
59	2016	0.168847	16.8847	1	0.693147	0.0508073	3.29	1.09861	33.3333	0.7106	0.4573	0	0.202526	2.19722	1.94591	C25	石油加工、炼焦及核燃料加工业	辽宁省	210000	盘锦市	211100
59	2017	0.187784	18.7784	1	0.693147	0.0492086	2.5	0.693147	50	0.74	0.4516	0	0.142563	2.30259	1.09861	C25	石油加工、炼焦及核燃料加工业	辽宁省	210000	盘锦市	211100
59	2018	0.25387	25.387	2	0.693147	0.0427052	2.4	1.60944	25	0.77	0.4163	1	0.084385	2.56495	2.83321	C25	石油加工、炼焦及核燃料加工业	辽宁省	210000	盘锦市	211100
59	2019	0.212331	21.2331	3	0	0.0449905	2.94	1.09861	9.52381	0.84	0.4762	1	0.024601	2.3979	3.09104	C25	石油加工、炼焦及核燃料加工业	辽宁省	210000	盘锦市	211100
59	2020	0.240059	24.0059	3	0	0.0455533	1.95	1.38629	20	1.69	0.4577	1	-0.002417	2.30259	2.77259	C25	石油加工、炼焦及核燃料加工业	辽宁省	210000	盘锦市	211100
59	2021	0.142336	14.2335	2	0	0.0377675	0.66	0	0	1.06	0.3767	1	0.054717	2.77259	2.56495	C25	石油加工、炼焦及核燃料加工业	辽宁省	210000	盘锦市	211100
59	2022	0.206541	20.6541	3	0	0.0361748	1.78	1.09861	7.14286	1.06	0.3586	1	0.011307	2.77259	3.3673	C25	石油加工、炼焦及核燃料加工业	辽宁省	210000	盘锦市	211100
59	2023	0.173484	17.3484	4	0.693147	0.0356463	1.62	1.38629	13.0435	1.79	0.3254	0	-0.008478	2.70805	3.17805	C25	石油加工、炼焦及核燃料加工业	辽宁省	210000	盘锦市	211100
60	2011	0.142933	14.2934	4	0	0.230689	0	0	0	2.02	0.287	1	0.183864	1.38629	0	C32	有色金属冶炼及压延加工业	广东省	440000	深圳市	440300
60	2012	0.143819	14.3819	4	0	0.255401	0	0	0	1.82	0.2797	1	0.064716	1.38629	0	C32	有色金属冶炼及压延加工业	广东省	440000	深圳市	440300
60	2013	0.138126	13.8126	4	0	0.249678	0	0	0	2.3287	0.2785	1	-0.106559	0.693147	0	C32	有色金属冶炼及压延加工业	广东省	440000	深圳市	440300
60	2014	0.104653	10.4653	1	0	0.243917	0	0	0	1.59	0.317	1	0.067561	0.693147	0	C32	有色金属冶炼及压延加工业	广东省	440000	深圳市	440300
60	2015	0.130912	13.0912	3	0	0.21198	7.66	0	0	1.75	0.3116	1	0.208651	0.693147	0	C32	有色金属冶炼及压延加工业	广东省	440000	深圳市	440300
60	2016	0.126625	12.6625	2	0	0.196752	7.98	0	0	2.0158	0.2996	1	0.041314	1.60944	0	C32	有色金属冶炼及压延加工业	广东省	440000	深圳市	440300
60	2017	0.154341	15.4341	3	1.09861	0.16704	8.44	0	0	1.66	0.2873	1	0.266507	2.3979	0	C32	有色金属冶炼及压延加工业	广东省	440000	深圳市	440300
60	2018	0.135466	13.5466	2	0	0.154565	8.09	0	0	2.08	0.3064	1	0.029926	2.30259	0.693147	C32	有色金属冶炼及压延加工业	广东省	440000	深圳市	440300
60	2019	0.143657	14.3657	2	0.693147	0.158528	8.67	0	0	1.65	0.3561	1	0.06036	2.70805	0	C32	有色金属冶炼及压延加工业	广东省	440000	深圳市	440300
60	2020	0.151061	15.1061	3	0.693147	0.127252	8.73	0.693147	20	2	0.3057	0	0.130037	1.94591	1.79176	C32	有色金属冶炼及压延加工业	广东省	440000	深圳市	440300
60	2021	0.380655	36.9914	2	0.693147	0.161654	9.1	0.693147	100	2.22	0.2799	1	0.071818	2.07944	0.693147	C32	有色金属冶炼及压延加工业	广东省	440000	深圳市	440300
60	2022	0.284735	28.4735	3	0	0.15425	9.27	0.693147	50	2.33	0.3454	1	0.111255	2.63906	1.09861	C32	有色金属冶炼及压延加工业	广东省	440000	深圳市	440300
60	2023	0.0992316	9.92316	4	1.79176	0.124133	9.02	0	0	2.33	0.4045	0	0.11899	1.60944	0	C32	有色金属冶炼及压延加工业	广东省	440000	深圳市	440300
61	2011	0.0611883	6.11883	1	2.99573	0.165666	0	0	0	2.59	0.2851	0	0.090875	0	0.693147	F51	批发业	广东省	440000	深圳市	440300
61	2012	0.0647846	6.47846	2	2.07944	0.158087	0	0	0	2.81	0.2752	0	0.048367	0	1.09861	L72	商务服务业	广东省	440000	深圳市	440300
61	2013	0.0768897	7.68897	2	3.58352	0.167358	0	0	0	2.7275	0.2281	0	0.415055	0	0.693147	L72	商务服务业	广东省	440000	深圳市	440300
61	2014	0.0811009	8.11008	2	4.21951	0.209392	0	0	0	2.75	0.223	0	0.006951	0	0	L72	商务服务业	广东省	440000	深圳市	440300
61	2015	0.0812227	8.12227	2	3.68888	0.183334	0	0	0	2.65	0.1761	0	-0.011607	1.09861	0	L72	商务服务业	广东省	440000	深圳市	440300
61	2016	0.073709	7.3709	2	3.52636	0.121412	0	0	0	2.9	0.1123	0	0.02688	1.09861	0	L72	商务服务业	广东省	440000	深圳市	440300
61	2017	0.14553	14.5529	2	3.55535	0.11673	0	0	0	2.68	0.0867	1	0.025712	1.38629	0	L72	商务服务业	广东省	440000	深圳市	440300
61	2018	0.154151	15.4151	2	3.98898	0.107091	1.24	0	0	2.26	0.1013	1	0.0283	1.79176	0	L72	商务服务业	广东省	440000	深圳市	440300
61	2019	0.0787932	7.87932	2	3.52636	0.0898373	1.01	0	0	2.28	0.1033	0	0.042394	1.94591	0	L72	商务服务业	广东省	440000	深圳市	440300
61	2020	0.0738356	7.38356	2	3.55535	0.0830283	0.66	0	0	2.43	0.1022	0	0.03258	1.38629	0	L72	商务服务业	广东省	440000	深圳市	440300
61	2021	0.0903273	9.03273	3	3.55535	0.0754047	0.87	0	0	2.25	0.0973	0	0.053972	2.07944	0	L72	商务服务业	广东省	440000	深圳市	440300
61	2022	0.0846658	8.46658	3	3.2581	0.068659	0.86	0	0	2.43	0.1027	0	0.005414	1.79176	0	L72	商务服务业	广东省	440000	深圳市	440300
61	2023	0.073151	7.3151	3	3.04452	0.0612993	0.91	0	0	2.93	0.1019	0	0.056738	0.693147	0	L72	商务服务业	广东省	440000	深圳市	440300
62	2011	0.0475258	4.75258	1	3.71357	0.0312402	0	0	0	2.31	0.0664	0	-0.013054	0	0	L71	租赁业	广东省	440000	深圳市	440300
62	2012	0.0485093	4.85093	1	4.12713	0.0258712	0	0	0	0	0.0516	0	-0.095966	0	0	L72	商务服务业	广东省	440000	深圳市	440300
62	2013	0.0505835	5.05835	1	4.31749	0.0264418	0	0	0	0	0.0505	0	0.251986	0	0	L72	商务服务业	广东省	440000	深圳市	440300
62	2014	0.0495263	4.95263	1	3.93183	0.0490337	0	0	0	0	0.0979	0	0.187846	0	0	L72	商务服务业	广东省	440000	深圳市	440300
62	2015	0.11836	11.836	1	3.98898	0.0324001	0	0	0	0	0.0614	1	0.546148	0	0	L72	商务服务业	广东省	440000	深圳市	440300
62	2016	0.122037	12.2037	1	3.68888	0.0258427	7.13	0	0	2.378	0.0475	1	0.109582	0	0	L72	商务服务业	广东省	440000	深圳市	440300
62	2017	0.128392	12.8392	1	3.97029	0.0220795	12.72	0	0	2.29	0.0361	1	0.096189	0	0	F51	批发业	广东省	440000	深圳市	440300
62	2018	0.0601962	6.01962	1	4.02535	0.017758	15.43	0	0	2.62	0.0282	0	0.122686	0	0	F51	批发业	广东省	440000	深圳市	440300
62	2019	0.0630422	6.30422	1	4.3438	0.0149841	14.36	0	0	3.07	0.023	0	0.109995	0	0	F51	批发业	广东省	440000	深圳市	440300
62	2020	0.066907	6.6907	1	4.60517	0.0147267	15.2	0	0	3.51	0.021	0	0.068239	0	0	F51	批发业	广东省	440000	深圳市	440300
62	2021	0.0693808	6.93808	2	3.82864	0.010941	15.76	0	0	3.25	0.0151	0	0.114059	0	0	F51	批发业	广东省	440000	深圳市	440300
62	2022	0.137027	13.7027	2	3.66356	0.0103271	13.43	0	0	3.82	0.0135	1	0.151046	0	0	F51	批发业	广东省	440000	深圳市	440300
62	2023	0.0632963	6.32963	2	3.49651	0.0091361	11.96	0	0	3.71	0.0118	0	0.025219	0	0	F51	批发业	广东省	440000	深圳市	440300
63	2011	0.336713	33.6713	3	3.66356	0.0113407	0	3.58352	0.984806	27.45	0.0665	1	0.053152	0.693147	8.17611	C39	计算机、通信和其他电子设备制造业	广东省	440000	深圳市	440300
63	2012	0.33296	33.296	4	3.78419	0.010117	0	3.13549	0.730654	31.18	0.066	1	-0.138844	0	8.01036	C39	计算机、通信和其他电子设备制造业	广东省	440000	深圳市	440300
63	2013	0.344525	34.4525	3	3.63759	0.0123577	0	3.52636	1.84667	30.0927	0.0744	1	0.045716	1.79176	7.48885	C39	计算机、通信和其他电子设备制造业	广东省	440000	深圳市	440300
63	2014	0.36078	36.078	4	3.82864	0.0128485	0	3.66356	1.49724	27.82	0.0692	1	0.112878	1.79176	7.83953	C39	计算机、通信和其他电子设备制造业	广东省	440000	深圳市	440300
63	2015	0.387442	36.9914	4	4.30406	0.0349434	37.46	3.33221	0.964286	28.54	0.0636	1	0.648706	2.07944	7.93773	C39	计算机、通信和其他电子设备制造业	广东省	440000	深圳市	440300
63	2016	0.386917	36.9914	4	4.35671	0.0307404	36.93	3.43399	1.50905	28.02	0.0531	1	-0.05683	1.94591	7.59539	C39	计算机、通信和其他电子设备制造业	广东省	440000	深圳市	440300
63	2017	0.383967	36.9914	6	4.04305	0.0329365	38.71	2.56495	0.652884	31.1864	0.0604	1	0.109944	1.94591	7.51698	C39	计算机、通信和其他电子设备制造业	广东省	440000	深圳市	440300
63	2018	0.407774	36.9914	7	4.23411	0.066165	38.06	2.70805	0.853138	32.1725	0.0688	1	-0.273676	2.3979	7.40367	C39	计算机、通信和其他电子设备制造业	广东省	440000	深圳市	440300
63	2019	0.414335	36.9914	7	4.02535	0.054665	40.39	2.89037	1.08974	33.7	0.0665	1	0.151502	2.48491	7.35308	C39	计算机、通信和其他电子设备制造业	广东省	440000	深圳市	440300
63	2020	0.397583	36.9914	7	3.66356	0.0621853	43.07	2.63906	0.936599	35.5	0.0791	1	0.215212	1.38629	7.23634	C39	计算机、通信和其他电子设备制造业	广东省	440000	深圳市	440300
63	2021	0.420594	36.9914	6	3.82864	0.0479638	46	3.3673	1.70732	37.19	0.0678	1	0.15535	2.07944	7.40306	C39	计算机、通信和其他电子设备制造业	广东省	440000	深圳市	440300
63	2022	0.413202	36.9914	5	3.58352	0.0405732	48.52	3.4012	1.50493	39.2335	0.0714	1	0.117392	2.19722	7.56424	C39	计算机、通信和其他电子设备制造业	广东省	440000	深圳市	440300
63	2023	0.410004	36.9914	5	3.73767	0.0383037	49.09	3.2581	1.84094	40.89	0.0665	1	0.147594	2.07944	7.2145	C39	计算机、通信和其他电子设备制造业	广东省	440000	深圳市	440300
65	2011	0.0914483	9.14483	1	0	1.45e-05	0	0	0	18.07	0.0057	1	0.123055	0	0	E48	土木工程建筑业	北京市	110000	北京市	110000
65	2012	0.107861	10.7861	1	0	0.0001249	0	0	0	20.38	0.0075	1	0.207231	0.693147	1.09861	E48	土木工程建筑业	北京市	110000	北京市	110000
65	2013	0.116744	11.6744	2	0	0.000179	0	0	0	22.4913	0.0353	1	0.240377	0	1.09861	E48	土木工程建筑业	北京市	110000	北京市	110000
65	2014	0.128671	12.8671	2	0	0.0613388	0	0	0	24.0418	0.0281	1	0.225183	0	2.07944	E48	土木工程建筑业	北京市	110000	北京市	110000
65	2015	0.152643	15.2644	1	0	0.123266	34.58	0	0	27.95	0.0187	1	0.832145	0.693147	1.60944	E48	土木工程建筑业	北京市	110000	北京市	110000
65	2016	0.292811	29.2811	2	0.693147	0.108613	43.71	1.38629	42.8571	8.57	0.0315	1	0.185793	0.693147	2.07944	E48	土木工程建筑业	北京市	110000	北京市	110000
65	2017	0.210643	21.0643	2	0	0.123984	43.75	0.693147	16.6667	10.74	0.0397	1	0.126634	0.693147	1.94591	E48	土木工程建筑业	北京市	110000	北京市	110000
65	2018	0.155749	15.5749	3	0	0.152258	39.53	0	0	10.88	0.0367	1	0.117425	0	1.60944	E48	土木工程建筑业	北京市	110000	北京市	110000
65	2019	0.159218	15.9218	3	0	0.115792	33.99	0	0	14.04	0.0381	1	0.183395	0.693147	1.60944	E48	土木工程建筑业	北京市	110000	北京市	110000
65	2020	0.310654	31.0653	3	0.693147	0.0917536	29.9	1.60944	44.4445	13.46	0.0438	1	0.141775	0.693147	2.30259	E48	土木工程建筑业	北京市	110000	北京市	110000
65	2021	0.142318	14.2318	2	1.38629	0.0813277	10.44	0	0	14.5	0.0984	1	0.098698	0	1.79176	E48	土木工程建筑业	北京市	110000	北京市	110000
65	2022	0.216226	21.6226	2	1.09861	0.0727627	11.7	1.09861	10.5263	14.98	0.1257	1	0.250875	1.38629	2.99573	E48	土木工程建筑业	北京市	110000	北京市	110000
65	2023	0.226699	22.6699	5	0	0.0651684	17.11	1.60944	33.3333	15.07	0.1224	0	0.086113	0.693147	2.56495	E48	土木工程建筑业	北京市	110000	北京市	110000
66	2011	0.153806	15.3806	5	2.30259	0.0228759	0	1.09861	10	2.88	0.0988	0	-0.060273	0	3.04452	C39	计算机、通信和其他电子设备制造业	广东省	440000	深圳市	440300
66	2012	0.163281	16.3282	5	1.94591	0.0574775	0	1.09861	9.09091	3.62	0.1015	0	0.002257	1.38629	3.13549	C39	计算机、通信和其他电子设备制造业	广东省	440000	深圳市	440300
66	2013	0.152681	15.2681	5	3.04452	0.0441643	0	0.693147	3.57143	4.1274	0.0943	0	-0.152022	1.38629	3.3673	C39	计算机、通信和其他电子设备制造业	广东省	440000	深圳市	440300
66	2014	0.173976	17.3976	5	2.83321	0.0239215	0	1.09861	12.5	4.12	0.0882	0	-0.025204	1.09861	2.83321	C39	计算机、通信和其他电子设备制造业	广东省	440000	深圳市	440300
66	2015	0.181807	18.1807	5	2.94444	0.0234581	17.86	1.09861	8	4.45	0.0927	0	0.027638	1.09861	3.2581	C39	计算机、通信和其他电子设备制造业	广东省	440000	深圳市	440300
66	2016	0.186375	18.6375	4	2.89037	0.0025983	17.93	1.60944	14.8148	4.33	0.0138	0	0.09215	0	3.33221	C39	计算机、通信和其他电子设备制造业	广东省	440000	深圳市	440300
66	2017	0.270709	27.0709	5	2.94444	0.0264987	27.38	1.09861	8.33333	6.59	0.1223	1	-0.524919	1.94591	3.21888	C39	计算机、通信和其他电子设备制造业	广东省	440000	深圳市	440300
66	2018	0.270271	27.0271	6	3.55535	0.0295418	25.83	0.693147	7.69231	6.44	0.12	1	-0.120149	1.94591	2.63906	C39	计算机、通信和其他电子设备制造业	广东省	440000	深圳市	440300
66	2019	0.271858	27.1858	6	3.63759	0.0210769	31.24	0.693147	3.44828	7.15	0.1284	1	0.166112	1.94591	3.4012	C39	计算机、通信和其他电子设备制造业	广东省	440000	深圳市	440300
66	2020	0.208503	20.8503	7	3.17805	0.0187826	31.03	0.693147	5.55556	7.83	0.1053	0	0.08049	1.94591	2.94444	C39	计算机、通信和其他电子设备制造业	广东省	440000	深圳市	440300
66	2021	0.209512	20.9513	4	3.09104	0.0202109	31.34	1.09861	18.1818	7.89	0.1214	0	0.151522	1.79176	2.48491	C39	计算机、通信和其他电子设备制造业	广东省	440000	深圳市	440300
66	2022	0.185579	18.5578	4	2.77259	0.0225744	30.86	1.09861	11.1111	8.91	0.1258	0	0.37952	0.693147	2.94444	C39	计算机、通信和其他电子设备制造业	广东省	440000	深圳市	440300
66	2023	0.110544	11.0544	4	3.17805	0.0222418	0	0	0	8.91	0.1399	0	-0.065501	0.693147	2.70805	C39	计算机、通信和其他电子设备制造业	广东省	440000	深圳市	440300
68	2013	0.104525	10.4525	1	0	0.0670657	0	0	0	13.8889	0.3628	1	-0.159658	0	0	C39	计算机、通信和其他电子设备制造业	广东省	440000	深圳市	440300
68	2014	0.158281	15.8281	1	1.09861	0.101031	0	0	0	44.5313	0.4877	1	-0.405342	0	0	C39	计算机、通信和其他电子设备制造业	广东省	440000	深圳市	440300
68	2016	0.157126	15.7126	1	1.38629	0.0310347	23.79	0	0	32.78	0.144	1	0.209108	1.09861	0	C39	计算机、通信和其他电子设备制造业	广东省	440000	深圳市	440300
68	2017	0.123827	12.3827	1	0.693147	0.013763	7.57	0	0	24.14	0.0637	1	0.364209	1.09861	0	C39	计算机、通信和其他电子设备制造业	广东省	440000	深圳市	440300
68	2018	0.13551	13.551	1	1.38629	0.0103485	9.43	0	0	25.14	0.0485	1	-0.143006	1.38629	0	C39	计算机、通信和其他电子设备制造业	广东省	440000	深圳市	440300
68	2019	0.137262	13.7262	1	1.38629	0.0272489	7.04	0	0	21.3	0.0485	1	0.022519	2.19722	0	C39	计算机、通信和其他电子设备制造业	广东省	440000	深圳市	440300
68	2020	0.0554912	5.54912	1	1.38629	0.0268645	6.02	0	0	16.39	0.053	0	-0.187141	1.60944	0	M74	专业技术服务业	广东省	440000	深圳市	440300
68	2021	0.0553669	5.53669	1	1.60944	0.0238286	10.27	0	0	13.39	0.0493	0	-0.154548	1.38629	0	M74	专业技术服务业	广东省	440000	深圳市	440300
68	2022	0.12303	12.303	1	1.79176	0.0214929	7.28	0	0	13.37	0.046	1	-0.356103	1.09861	0	M74	专业技术服务业	广东省	440000	深圳市	440300
68	2023	0.0591307	5.91307	1	1.60944	0.0209404	11.49	0	0	19.32	0.0157	0	1.50098	1.09861	0	M74	专业技术服务业	广东省	440000	深圳市	440300
69	2011	0.105992	10.5992	3	0	0.0614594	0	0	0	1.79	0.1854	1	0.230046	0	0	L72	商务服务业	广东省	440000	深圳市	440300
69	2012	0.0941506	9.41506	2	0	0.0639597	0	0	0	1.61	0.1726	1	0.212199	0	0	N78	公共设施管理业	广东省	440000	深圳市	440300
69	2013	0.122674	12.2674	2	1.60944	0.0533919	0	0	0	1.7386	0.1635	1	0.260864	1.38629	0	N78	公共设施管理业	广东省	440000	深圳市	440300
69	2014	0.124225	12.4225	3	1.79176	0.0486881	0	0	0	2.0102	0.1646	1	0.166041	0	0	N78	公共设施管理业	广东省	440000	深圳市	440300
69	2015	0.111644	11.1645	3	0.693147	0.0389617	1.12	0	0	2.43	0.1303	1	0.307879	0	0	N78	公共设施管理业	广东省	440000	深圳市	440300
69	2016	0.0359537	3.59537	2	1.38629	0.0297807	1.3	0	0	2.61	0.0998	0	0.140836	0	0	N78	公共设施管理业	广东省	440000	深圳市	440300
69	2017	0.0260594	2.60594	1	1.60944	0.0285078	0.92	0	0	3.2	0.0646	0	0.360793	0	0	N78	公共设施管理业	广东省	440000	深圳市	440300
69	2018	0.0394839	3.94839	2	0.693147	0.0257773	0	0	0	3.0842	0.0495	0	0.178357	1.60944	0	K70	房地产业	广东省	440000	深圳市	440300
69	2019	0.0745564	7.45564	4	1.94591	0.023551	0	0	0	4.13	0.0419	0	0.230743	1.38629	0	K70	房地产业	广东省	440000	深圳市	440300
69	2020	0.145877	14.5877	4	2.19722	0.023057	0	0	0	4.59	0.0407	1	0.161929	1.09861	0	K70	房地产业	广东省	440000	深圳市	440300
69	2021	0.138766	13.8765	3	1.79176	0.0248385	0	0	0	4.55	0.0454	1	0.096515	2.07944	0	K70	房地产业	广东省	440000	深圳市	440300
69	2022	0.160573	16.0573	5	1.79176	0.0305246	0	0	0	6.62	0.0602	1	-0.166875	1.60944	0	K70	房地产业	广东省	440000	深圳市	440300
69	2023	0.0593915	5.93915	4	0	0.0302504	0	0	0	5.45	0.0602	0	-0.14506	1.79176	0	K70	房地产业	广东省	440000	深圳市	440300
70	2011	0.0375774	3.75774	1	0.693147	0.0687366	0	0	0	2	0.2817	0	0.054096	0	1.79176	C39	计算机、通信和其他电子设备制造业	广东省	440000	深圳市	440300
70	2012	0.0215187	2.15187	1	0	0.0533196	0	0	0	1.75	0.1682	0	0.064625	0	1.38629	C38	电气机械及器材制造业	广东省	440000	深圳市	440300
70	2013	0.0428755	4.28755	1	1.38629	0.0377257	0	0	0	2.2623	0.1882	0	0.192467	0	2.19722	C38	电气机械及器材制造业	广东省	440000	深圳市	440300
70	2014	0.100813	10.0813	1	2.63906	0.0298516	0	0.693147	11.1111	2.16	0.1836	0	0.082269	0	2.30259	C38	电气机械及器材制造业	广东省	440000	深圳市	440300
70	2015	0.138258	13.8258	1	2.19722	0.0351967	12.43	0	0	1.6	0.1341	1	0.117331	0.693147	2.77259	C38	电气机械及器材制造业	广东省	440000	深圳市	440300
70	2016	0.106523	10.6523	1	0.693147	0.0267371	12.56	0	0	1.29	0.1228	1	0.107866	0	1.60944	C38	电气机械及器材制造业	广东省	440000	深圳市	440300
70	2017	0.133508	13.3508	1	1.60944	0.0208738	14.77	0	0	1.32	0.0983	1	0.168835	1.09861	2.63906	C38	电气机械及器材制造业	广东省	440000	深圳市	440300
70	2018	0.130737	13.0737	1	1.38629	0.0193849	14.64	0	0	1.74	0.0965	1	0.20691	0.693147	3.04452	C38	电气机械及器材制造业	广东省	440000	深圳市	440300
70	2019	0.135111	13.5111	1	2.30259	0.0218712	15.45	0	0	2.68	0.0822	1	0.309644	0.693147	2.07944	C38	电气机械及器材制造业	广东省	440000	深圳市	440300
70	2020	0.152369	15.2369	1	2.70805	0.0143889	18.36	0	0	3.51	0.0559	1	0.031218	0.693147	3.66356	C38	电气机械及器材制造业	广东省	440000	深圳市	440300
70	2021	0.212764	21.2764	2	3.21888	0.0163524	19.22	1.09861	5.26316	3.07	0.0616	1	-0.152731	0.693147	3.66356	C38	电气机械及器材制造业	广东省	440000	深圳市	440300
70	2022	0.205232	20.5232	2	3.29584	0.0258996	19.03	0.693147	9.09091	2.68	0.1452	1	-0.061354	0.693147	2.48491	C38	电气机械及器材制造业	广东省	440000	深圳市	440300
70	2023	0.100403	10.0403	3	3.4012	0.0155465	18.37	0	0	2.68	0.1645	0	0.051657	0	2.3979	C38	电气机械及器材制造业	广东省	440000	深圳市	440300
78	2011	0.0781742	7.81742	1	0	0.036478	0	0	0	1.87	0.0853	1	0.075798	0	0	C27	医药制造业	广东省	440000	深圳市	440300
78	2012	0.0868798	8.68798	1	0	0.0343149	0	0	0	1.82	0.0736	1	0.088501	1.09861	0	F52	零售业	广东省	440000	深圳市	440300
78	2013	0.106512	10.6512	3	0	0.0321719	0	0	0	2.3968	0.073	1	0.786232	0.693147	0	F52	零售业	广东省	440000	深圳市	440300
78	2014	0.128594	12.8594	3	2.07944	0.0268639	0	0	0	2.27	0.0702	1	-0.055842	0.693147	0	F52	零售业	广东省	440000	深圳市	440300
78	2015	0.109933	10.9933	2	1.38629	0.0212397	3.1	0	0	1.91	0.0357	1	0.202227	0.693147	0	F52	零售业	广东省	440000	深圳市	440300
78	2016	0.0937836	9.37836	2	0	0.0188338	3.04	0	0	1.34	0.0292	1	1.74279	0.693147	0	F52	零售业	广东省	440000	深圳市	440300
78	2017	0.08681	8.681	1	1.09861	0.0110437	1.49	0	0	1.37	0.0242	1	0.100721	0	0	F52	零售业	广东省	440000	深圳市	440300
78	2018	0.103068	10.3068	1	2.07944	0.0062543	1.39	0	0	1.46	0.022	1	0.106391	0.693147	0	F52	零售业	广东省	440000	深圳市	440300
78	2019	0.0803085	8.03086	1	0	0.0069388	1.28	0	0	1.34	0.0241	1	0.09672	0.693147	0	F52	零售业	广东省	440000	深圳市	440300
78	2020	0.098206	9.8206	1	1.60944	0.0070047	1.3	0	0	1.54	0.027	1	-0.045971	0.693147	0	F52	零售业	广东省	440000	深圳市	440300
78	2021	0.112899	11.2899	1	2.19722	0.0113454	1.42	0	0	1.52	0.0316	1	-0.024238	1.60944	0	F52	零售业	广东省	440000	深圳市	440300
78	2022	0.0961923	9.61923	1	1.94591	0.0113066	1.24	0	0	1.39	0.0318	1	-0.163901	0	0	F52	零售业	广东省	440000	深圳市	440300
78	2023	0.0288133	2.88133	1	2.19722	0.0117988	1.83	0	0	1.39	0.0321	0	-0.309962	0	0	F52	零售业	广东省	440000	深圳市	440300
88	2011	0.0260222	2.60222	2	0	0.130994	0	0	0	5.15	0.0355	0	0.090088	0	0	G58	装卸搬运和运输代理业	广东省	440000	深圳市	440300
88	2012	0.0334488	3.34488	2	0.693147	0.140692	0	0	0	4.54	0.036	0	-0.020179	0	0	G54	道路运输业	广东省	440000	深圳市	440300
88	2013	0.0321293	3.21293	2	0.693147	0.128452	0	0	0	4.1431	0.0316	0	0.043051	0	0	G54	道路运输业	广东省	440000	深圳市	440300
88	2014	0.0319133	3.19133	2	0.693147	0.100719	0	0	0	5.59	0.0242	0	0.085051	0	0	G54	道路运输业	广东省	440000	深圳市	440300
88	2015	0.0291623	2.91623	2	0.693147	0.0237842	0	0	0	7.15	0.0202	0	0.095741	0	0	G54	道路运输业	广东省	440000	深圳市	440300
88	2016	0.0292497	2.92497	2	0.693147	0.0297321	0	0	0	6.3	0.0385	0	0.067084	0	0	G54	道路运输业	广东省	440000	深圳市	440300
88	2017	0.0458638	4.58638	3	0.693147	0.0249613	0	0	0	5.46	0.0556	0	0.092051	0.693147	0	G54	道路运输业	广东省	440000	深圳市	440300
88	2018	0.096073	9.60731	2	0	0.0208039	0	0	0	5.16	0.181	1	0.094502	0	0	G54	道路运输业	广东省	440000	深圳市	440300
88	2019	0.105578	10.5578	2	0.693147	0.023356	0	0	0	6.32	0.1933	1	0.056351	0	0	G54	道路运输业	广东省	440000	深圳市	440300
88	2020	0.115434	11.5434	2	0.693147	0.0182065	2.59	0	0	6.02	0.2623	1	0.203255	0.693147	0	G54	道路运输业	广东省	440000	深圳市	440300
88	2021	0.115786	11.5786	2	1.38629	0.0169875	1.42	0	0	5.91	0.2557	1	0.036828	0	0	G54	道路运输业	广东省	440000	深圳市	440300
88	2022	0.123859	12.3859	2	1.09861	0.0736997	0.9	0	0	5.83	0.233	1	0.063561	1.09861	0	G54	道路运输业	广东省	440000	深圳市	440300
88	2023	0.0651077	6.51077	3	1.09861	0.0652463	0.67	0	0	6.67	0.2393	0	-0.026692	1.09861	0	G54	道路运输业	广东省	440000	深圳市	440300
89	2011	0.119464	11.9464	4	0	0.0320313	0	0	0	1.99	0.2781	1	0.171868	0	0	G58	装卸搬运和运输代理业	广东省	440000	深圳市	440300
89	2012	0.113249	11.3248	2	0.693147	0.02756	0	0	0	2.37	0.2217	1	0.071161	0.693147	0.693147	G56	航空运输业	广东省	440000	深圳市	440300
89	2013	0.155819	15.582	2	1.94591	0.0237308	0	0	0	2.8391	0.7743	1	0.063087	2.07944	0	G56	航空运输业	广东省	440000	深圳市	440300
89	2014	0.143033	14.3033	2	1.79176	0.0195068	0	0	0	2.82	0.6485	1	0.025729	1.38629	0	G56	航空运输业	广东省	440000	深圳市	440300
89	2015	0.141178	14.1178	2	2.07944	0.0203289	0	0	0	3.18	0.6597	1	0.29436	0.693147	0	G56	航空运输业	广东省	440000	深圳市	440300
89	2016	0.167831	16.7831	4	2.07944	0.0190293	0	0	0	3.2912	0.613	1	0.045361	1.38629	0	G56	航空运输业	广东省	440000	深圳市	440300
89	2017	0.152233	15.2233	4	1.38629	0.0178537	0	0	0	3.16	0.5639	1	0.046642	0.693147	0	G56	航空运输业	广东省	440000	深圳市	440300
89	2018	0.168897	16.8897	5	2.3979	0.0186418	0	0	0	3.37	0.5633	1	0.038962	0	0	G56	航空运输业	广东省	440000	深圳市	440300
89	2019	0.0919124	9.19125	5	1.94591	0.0179064	0	0	0	3.37	0.5268	0	0.03618	0	0	G56	航空运输业	广东省	440000	深圳市	440300
89	2020	0.111738	11.1738	5	2.07944	0.0167852	0	0	0	3.89	0.4925	0	-0.011558	1.09861	1.38629	G56	航空运输业	广东省	440000	深圳市	440300
89	2021	0.118734	11.8734	2	2.07944	0.0107153	0	0.693147	10	4.03	0.526	0	-0.003076	0	2.3979	G56	航空运输业	广东省	440000	深圳市	440300
89	2022	0.0768913	7.68913	2	1.79176	0.011951	0	0	0	4.32	0.5274	0	-0.101434	0.693147	1.94591	G56	航空运输业	广东省	440000	深圳市	440300
89	2023	0.0697194	6.97194	3	1.38629	0.0118742	0	0	0	4.14	0.4789	0	0.036105	0	1.09861	G56	航空运输业	广东省	440000	深圳市	440300
90	2011	0.084385	8.4385	1	0	0.0198134	0	0	0	5.17	0.022	1	-0.343625	0.693147	0	E47	房屋建筑业	广东省	440000	深圳市	440300
90	2012	0.085543	8.5543	1	0.693147	0.0141912	0	0	0	0	0.0171	1	0.049343	0.693147	0	E48	土木工程建筑业	广东省	440000	深圳市	440300
90	2013	0.0822899	8.22899	1	0	0.011791	0	0	0	3.6364	0.0245	1	0.046489	0.693147	0	E48	土木工程建筑业	广东省	440000	深圳市	440300
90	2014	0.0814702	8.14702	1	0	0.0100767	0	0	0	3.25	0.0173	1	0.096601	0.693147	0	E48	土木工程建筑业	广东省	440000	深圳市	440300
90	2015	0.100947	10.0947	1	1.09861	0.0064269	3.1	0	0	3.09	0.0105	1	0.676667	1.38629	0	E48	土木工程建筑业	广东省	440000	深圳市	440300
90	2016	0.108657	10.8657	3	0	0.0062665	2.88	0	0	2.8066	0.0129	1	0.022185	1.09861	0	E48	土木工程建筑业	广东省	440000	深圳市	440300
90	2017	0.122268	12.2268	3	1.09861	0.0047379	3.1	0	0	2.06	0.0121	1	0.03995	1.38629	0	E48	土木工程建筑业	广东省	440000	深圳市	440300
90	2018	0.112718	11.2718	3	0.693147	0.0011916	2.58	0	0	3.31	0.0098	1	0.326174	0.693147	0	E48	土木工程建筑业	广东省	440000	深圳市	440300
90	2019	0.116436	11.6436	2	2.19722	0.0036933	2.49	0	0	2.01	0.0101	1	0.1056	0.693147	0	E48	土木工程建筑业	广东省	440000	深圳市	440300
90	2020	0.0971938	9.71938	1	1.38629	0.0119633	2.61	0	0	2.29	0.0099	1	0.142513	0.693147	0	E48	土木工程建筑业	广东省	440000	深圳市	440300
90	2021	0.114846	11.4846	2	1.09861	0.0184966	3.03	0	0	2.75	0.0084	1	0.162108	1.09861	0.693147	E48	土木工程建筑业	广东省	440000	深圳市	440300
90	2022	0.117518	11.7518	2	1.38629	0.0229337	2.98	0	0	2.7	0.0071	1	0.098367	0.693147	1.09861	E48	土木工程建筑业	广东省	440000	深圳市	440300
90	2023	0.0365851	3.65851	2	0.693147	0.0205199	4.8	0	0	3.06	0.0062	0	0.072194	1.09861	0	E48	土木工程建筑业	广东省	440000	深圳市	440300
96	2011	0.0766447	7.66447	1	0	0.0724897	0	0	0	0	0.0486	1	0.051028	0	0	F51	批发业	广东省	440000	深圳市	440300
96	2012	0.0784219	7.84219	1	0	0.0700858	0	0	0	1.89	0.0425	1	-0.004682	0	0	F51	批发业	广东省	440000	深圳市	440300
96	2013	0.0774137	7.74137	1	0	0.0657674	0	0	0	1.3477	0.0388	1	0.037652	0	0	F51	批发业	广东省	440000	深圳市	440300
96	2014	0.0774151	7.74151	1	0	0.0639271	0	0	0	1.3	0.0429	1	0.00923	0	0	F51	批发业	广东省	440000	深圳市	440300
96	2015	0.0772659	7.72659	1	0	0.0565112	0	0	0	1.82	0.0347	1	0.068377	0	0	F51	批发业	广东省	440000	深圳市	440300
96	2016	0.0763815	7.63815	1	0	0.0496444	0	0	0	1.54	0.0302	1	0.141271	0	0	F51	批发业	广东省	440000	深圳市	440300
96	2017	0.0757024	7.57024	1	0	0.045443	0	0	0	1.26	0.0272	1	0.0422	0	0	F51	批发业	广东省	440000	深圳市	440300
96	2018	0.0113872	1.22037	1	0	0.0421105	0	0	0	1.74	0.0275	0	0.040603	0.693147	0	F51	批发业	广东省	440000	深圳市	440300
96	2019	0.0261191	2.61191	1	1.38629	0.0363141	0	0	0	2	0.0187	0	0.094805	0.693147	0	F51	批发业	广东省	440000	深圳市	440300
96	2020	0.0311018	3.11018	1	2.3979	0.0185793	0	0	0	2.86	0.0157	0	0.045294	0	0	F51	批发业	广东省	440000	深圳市	440300
96	2021	0.0379746	3.79746	2	1.94591	0.0176836	0	0	0	3.39	0.015	0	0.01893	0	0	F51	批发业	广东省	440000	深圳市	440300
96	2022	0.0384852	3.84852	2	1.09861	0.0234395	0	0	0	3.44	0.0155	0	-0.107467	1.09861	0	F51	批发业	广东省	440000	深圳市	440300
96	2023	0.026796	2.67959	1	1.09861	0.0175703	0	0	0	3.44	0.0133	0	0.051925	1.09861	0	F51	批发业	广东省	440000	深圳市	440300
99	2011	0.0388861	3.88861	2	0	0.0052714	0	0	0	2.57	0.6192	0	0.07038	0	0	G56	航空运输业	广东省	440000	深圳市	440300
99	2012	0.0357163	3.57163	2	0	0.0042419	0	0	0	3.2258	0.521	0	0.149371	0	0	G56	航空运输业	广东省	440000	深圳市	440300
99	2013	0.0530799	5.30799	1	0	0.0041554	0	0	0	3.5792	0.6393	0	0.232709	2.77259	0	G56	航空运输业	广东省	440000	深圳市	440300
99	2014	0.0623463	6.23463	2	1.09861	0.0033726	0	0	0	3.07	0.5996	0	0.149421	1.38629	0	G56	航空运输业	广东省	440000	深圳市	440300
99	2015	0.0533302	5.33302	2	1.09861	0.0031439	0	0	0	3.25	0.6654	0	0.033404	0	0	G56	航空运输业	广东省	440000	深圳市	440300
99	2016	0.030135	3.0135	1	0	0.0201778	0	0	0	3.268	0.6416	0	0.022031	0	0	G56	航空运输业	广东省	440000	深圳市	440300
99	2017	0.0967615	9.67615	1	0	0.0169199	0	0	0	4.02	0.5239	1	0.065136	0	0	G56	航空运输业	广东省	440000	深圳市	440300
99	2018	0.096582	9.6582	1	0	0.0166006	0	0	0	5.1376	0.4874	1	0.045495	0	0	G56	航空运输业	广东省	440000	深圳市	440300
99	2019	0.102881	10.2881	1	0	0.0157099	0	0	0	5.22	0.3961	1	0.05877	0	1.38629	G56	航空运输业	广东省	440000	深圳市	440300
99	2020	0.13538	13.538	2	1.09861	0.0167613	12.84	0	0	6.37	0.4118	1	0.060394	0	1.09861	G56	航空运输业	广东省	440000	深圳市	440300
99	2021	0.164901	16.4901	3	1.79176	0.0137241	12.33	0	0	7.27	0.3228	1	0.377104	0.693147	2.19722	G56	航空运输业	广东省	440000	深圳市	440300
99	2022	0.152814	15.2814	3	1.38629	0.0134335	2.7	0	0	7.71	0.3386	1	0.034197	0.693147	1.94591	G56	航空运输业	广东省	440000	深圳市	440300
99	2023	0.129382	12.9382	3	0.693147	0.0132027	2.43	0.693147	14.2857	8.03	0.3984	0	0.021154	0.693147	2.07944	G56	航空运输业	广东省	440000	深圳市	440300
100	2011	0.190151	19.0151	3	1.79176	0.0183916	0	1.09861	2.94118	2.14	0	1	0.065812	0.693147	4.23411	C39	计算机、通信和其他电子设备制造业	广东省	440000	惠州市	441300
100	2012	0.191487	19.1486	5	2.19722	0.0225569	0	0	0	2.19	0.2675	1	0.049252	0.693147	4.45435	C39	计算机、通信和其他电子设备制造业	广东省	440000	惠州市	441300
100	2013	0.257459	25.7459	6	3.04452	0.0239915	0	1.60944	3.0303	2.1281	0	1	-0.013581	0.693147	4.89035	C39	计算机、通信和其他电子设备制造业	广东省	440000	惠州市	441300
100	2014	0.235974	23.5974	6	4.36945	0.0241549	0	0.693147	0.675676	2.68	0	1	0.345845	0	5.00395	C39	计算机、通信和其他电子设备制造业	广东省	440000	惠州市	441300
100	2015	0.262252	26.2252	6	4.41884	0.0267028	9.11	1.09861	1.6129	3.24	0	1	0.400921	0.693147	4.82831	C39	计算机、通信和其他电子设备制造业	广东省	440000	惠州市	441300
100	2016	0.262179	26.2179	5	3.95124	0.0323199	8.55	1.60944	2.51572	6.6414	0	1	0.215718	0	5.07517	C39	计算机、通信和其他电子设备制造业	广东省	440000	惠州市	441300
100	2017	0.257643	25.7643	5	4.3438	0.0397551	10.56	1.38629	1.52284	3.468	0	1	0.183535	0	5.28827	C39	计算机、通信和其他电子设备制造业	广东省	440000	惠州市	441300
100	2018	0.320391	32.0391	6	3.49651	0.030892	16.63	2.70805	8.28402	7.94	0	1	0.124277	0	5.1358	C39	计算机、通信和其他电子设备制造业	广东省	440000	惠州市	441300
100	2019	0.349223	34.9223	4	2.56495	0.0344844	17.4	4.02535	17.134	7.0494	0	1	0.049472	0	5.77455	C39	计算机、通信和其他电子设备制造业	广东省	440000	惠州市	441300
100	2020	0.349562	34.9562	3	1.94591	0.038983	16.83	4.36945	21.3115	5.76	0	1	0.409716	0	5.90536	C39	计算机、通信和其他电子设备制造业	广东省	440000	惠州市	441300
100	2021	0.384423	36.9914	4	0	0.0452904	16.14	4.69135	34.0694	5.215	0	1	0.32855	1.09861	5.76205	C39	计算机、通信和其他电子设备制造业	广东省	440000	惠州市	441300
100	2022	0.371328	36.9914	4	1.60944	0.0466225	17.16	4.11087	26.9058	6.0792	0	1	0.104268	1.38629	5.41165	C39	计算机、通信和其他电子设备制造业	广东省	440000	惠州市	441300
100	2023	0.195295	19.5295	5	2.99573	0.0481105	15.04	1.60944	3.33333	6.0792	0	0	0.099344	1.09861	4.79579	C39	计算机、通信和其他电子设备制造业	广东省	440000	惠州市	441300
151	2011	0.0870639	8.70639	1	0	0.0161815	0	0	0	11.11	0.0728	1	-0.022374	0	0	F52	零售业	北京市	110000	北京市	110000
151	2012	0.097337	9.7337	1	0	0.0112257	0	0	0	16.01	0.0491	1	0.053066	0.693147	0	F51	批发业	北京市	110000	北京市	110000
151	2013	0.0251764	2.51764	1	0	0.0073184	0	0	0	15.3846	0.0327	0	0.079193	0.693147	0	F51	批发业	北京市	110000	北京市	110000
151	2014	0.0485748	4.85748	3	0	0.0060761	0	0	0	16.88	0.0128	0	0.023808	0.693147	0	F51	批发业	北京市	110000	北京市	110000
151	2015	0.0465545	4.65545	3	0	0.0072433	0	0	0	20.1	0.0163	0	0.012614	0	0	F51	批发业	北京市	110000	北京市	110000
151	2016	0.125439	12.5439	2	0	0.010791	21.48	0.693147	16.6667	23.7037	0.016	0	-0.016954	0	1.94591	F51	批发业	北京市	110000	北京市	110000
151	2017	0.0706487	7.06487	2	0	0.0098787	27.7	0	0	22.9	0.0295	0	-0.00764	0	1.60944	F51	批发业	北京市	110000	北京市	110000
151	2018	0.1648	16.48	4	0	0.0098961	23.7	0	0	25.26	0.0278	1	0.01002	0	1.79176	F51	批发业	北京市	110000	北京市	110000
151	2019	0.16044	16.044	4	0	0.008634	31.92	0	0	27.56	0.0242	1	-0.052298	0	0	F51	批发业	北京市	110000	北京市	110000
151	2020	0.164371	16.4371	4	0	0.0109288	35.09	0	0	28.74	0.0284	1	-0.327515	0	0	F51	批发业	北京市	110000	北京市	110000
151	2021	0.100021	10.0021	1	0	0.0081717	10.49	0	0	11.26	0.0178	1	-0.069353	0	1.09861	F51	批发业	北京市	110000	北京市	110000
151	2022	0.163763	16.3763	1	0.693147	0.0063659	12.01	0.693147	8.33333	12.01	0.0136	1	-0.15463	0.693147	2.56495	F51	批发业	北京市	110000	北京市	110000
151	2023	0.0282932	2.82932	1	0	0.0101629	14.51	0	0	14.3	0.0221	0	-0.299814	0	0	F51	批发业	北京市	110000	北京市	110000
153	2011	0.0262735	2.62735	1	0	0.122562	0	0	0	0	0.365	0	0.015155	0	0.693147	C27	医药制造业	安徽省	340000	芜湖市	340200
153	2012	0.0368905	3.68905	1	0	0.111642	0	0	0	0	0.3601	0	0.014296	0	2.30259	C27	医药制造业	安徽省	340000	芜湖市	340200
153	2013	0.0250173	2.50173	1	0	0.0813744	0	0	0	0	0.3191	0	0.360363	0	1.09861	C27	医药制造业	安徽省	340000	芜湖市	340200
153	2014	0.0296061	2.96061	1	0	0.0716225	0	0	0	0	0.273	0	0.024166	0	2.07944	C27	医药制造业	安徽省	340000	芜湖市	340200
153	2015	0.0258159	2.58159	1	0	0.0691034	2.46	0	0	0	0.2601	0	0.032535	0	1.38629	C27	医药制造业	安徽省	340000	芜湖市	340200
153	2016	0.0979357	9.79357	1	0	0.0496043	2.53	0	0	0	0.3389	1	-0.038657	1.09861	0	C27	医药制造业	安徽省	340000	芜湖市	340200
153	2017	0.0983287	9.83287	1	0	0.0432769	2.89	0	0	0	0.2891	1	0.058713	1.38629	0	C27	医药制造业	安徽省	340000	芜湖市	340200
153	2018	0.100733	10.0733	1	0	0.0448711	3.32	0	0	0	0.2523	1	0.058446	1.79176	0	C27	医药制造业	安徽省	340000	芜湖市	340200
153	2019	0.0262983	2.62983	1	0	0.0382469	3.42	0	0	0	0.2015	0	0.027351	1.60944	0	C27	医药制造业	安徽省	340000	芜湖市	340200
153	2020	0.0349369	3.49369	1	0	0.0430318	3.51	0	0	0	0.1857	0	0.091068	2.07944	0.693147	C27	医药制造业	安徽省	340000	芜湖市	340200
153	2021	0.0410596	4.10596	1	0.693147	0.0425534	3.66	0	0	0	0.1847	0	0.075778	2.48491	0	C27	医药制造业	安徽省	340000	芜湖市	340200
153	2022	0.106405	10.6405	1	0	0.0380917	3.57	0	0	0	0.2185	1	-0.009357	2.63906	0	C27	医药制造业	安徽省	340000	芜湖市	340200
153	2023	0.0416664	4.16664	1	0	0.0463939	3.58	0	0	0	0.2147	0	0.093496	2.70805	0.693147	C27	医药制造业	安徽省	340000	芜湖市	340200
155	2011	0.0504022	5.04022	2	0	0.0201578	0	0	0	0.1	0.5125	0	-0.129539	2.07944	0	C26	化学原料及化学制品制造业	四川省	510000	成都市	510100
155	2013	0.30077	30.077	3	0	0.0164453	0	0.693147	100	0.1778	0.4482	0	-0.483031	1.79176	0.693147	C26	化学原料及化学制品制造业	四川省	510000	成都市	510100
155	2017	0.0519729	5.19729	1	1.38629	0.0054088	0	0	0	10.64	0.3827	0	-0.108305	1.09861	0	C26	化学原料及化学制品制造业	四川省	510000	成都市	510100
155	2018	0.0523897	5.23897	1	1.09861	0.0101703	0	0	0	15.09	0.4247	0	0.030498	0.693147	0	C26	化学原料及化学制品制造业	四川省	510000	成都市	510100
155	2019	0.0322473	3.22473	1	0	0.0103293	0	0	0	13.97	0.3991	0	0.114472	0	0	C26	化学原料及化学制品制造业	四川省	510000	成都市	510100
155	2020	0.071385	7.13851	1	1.60944	0.0094003	0	0	0	14.34	0.518	0	0.077712	1.94591	0	D44	电力、热力生产和供应业	四川省	510000	成都市	510100
155	2021	0.0929365	9.29365	2	1.94591	0.272773	0.68	0	0	2.35	0.3407	0	0.101806	3.33221	0	D44	电力、热力生产和供应业	四川省	510000	成都市	510100
155	2022	0.106666	10.6666	2	2.19722	0.24465	5.3	0	0	2.51	0.3292	0	0.193936	3.8712	0.693147	D44	电力、热力生产和供应业	四川省	510000	成都市	510100
155	2023	0.13659	13.659	5	2.07944	0.213678	9.1	0	0	2.51	0.3142	0	0.145255	3.17805	1.09861	D44	电力、热力生产和供应业	四川省	510000	成都市	510100
156	2012	0.132211	13.2211	2	2.30259	0.049456	0	0	0	0	0.42	1	0.216629	0.693147	0	R86	广播、电视、电影和影视录音制作业	浙江省	330000	杭州市	330100
156	2013	0.130005	13.0005	2	2.70805	0.0415401	0	0	0	0	0.4123	1	1.01272	0	0	R86	广播、电视、电影和影视录音制作业	浙江省	330000	杭州市	330100
156	2014	0.109787	10.9787	1	1.94591	0.0405557	0	0	0	0	0.3981	1	0.21696	0	0	R86	广播、电视、电影和影视录音制作业	浙江省	330000	杭州市	330100
156	2015	0.121464	12.1464	1	3.46574	0.0180699	6.58	0	0	0	0.1828	1	3.19474	0	0	R86	广播、电视、电影和影视录音制作业	浙江省	330000	杭州市	330100
156	2016	0.121218	12.1218	1	3.4012	0.0185661	7.69	0	0	0	0.1756	1	0.092433	0	0	R86	广播、电视、电影和影视录音制作业	浙江省	330000	杭州市	330100
156	2017	0.157488	15.7488	3	3.71357	0.0218338	8.3	0	0	0	0.1844	1	0.026014	1.09861	0	R86	广播、电视、电影和影视录音制作业	浙江省	330000	杭州市	330100
156	2018	0.187523	18.7523	6	4.17439	0.0234934	8.46	0	0	0	0.1927	1	0.02592	0	0	R86	广播、电视、电影和影视录音制作业	浙江省	330000	杭州市	330100
156	2019	0.174911	17.4911	4	4.17439	0.023858	9.18	0	0	0	0.1939	1	0.033518	1.09861	0	R86	广播、电视、电影和影视录音制作业	浙江省	330000	杭州市	330100
156	2020	0.205374	20.5374	6	4.62497	0.0215245	5.43	0	0	0	0.3429	1	-0.107277	1.09861	0	R86	广播、电视、电影和影视录音制作业	浙江省	330000	杭州市	330100
156	2021	0.151993	15.1993	2	3.82864	0.0215331	6.39	0	0	0	0.3351	1	0.044341	1.09861	0	R86	广播、电视、电影和影视录音制作业	浙江省	330000	杭州市	330100
156	2022	0.152198	15.2198	2	3.80666	0.0211813	7.2	0	0	0	0.332	1	0.030128	1.09861	0	R86	广播、电视、电影和影视录音制作业	浙江省	330000	杭州市	330100
156	2023	0.101324	10.1324	4	3.3673	0.019965	7.22	0	0	0	0.3207	0	0.017849	1.38629	0	R86	广播、电视、电影和影视录音制作业	浙江省	330000	杭州市	330100
157	2011	0.190929	19.0929	3	0	0.0364048	0	1.60944	2.31214	4.82	0.0573	1	0.297015	0	5.15906	C35	专用设备制造业	湖南省	430000	长沙市	430100
157	2012	0.223027	22.3027	1	0	0.0306956	0	3.09104	2.78146	5.86	0.0514	1	0.155865	0	6.62804	C35	专用设备制造业	湖南省	430000	长沙市	430100
157	2013	0.185493	18.5493	2	0	0.0327348	0	1.38629	0.35503	6.4711	0	1	0.020943	0.693147	6.74052	C35	专用设备制造业	湖南省	430000	长沙市	430100
157	2014	0.231211	23.1211	3	1.09861	0.0352714	0	2.30259	0.986842	6.45	0	1	-0.019111	0	6.81674	C35	专用设备制造业	湖南省	430000	长沙市	430100
157	2015	0.290277	29.0277	3	2.48491	0.0495069	21.85	3.17805	3.14637	5.57	0	1	-0.015487	0	6.59578	C35	专用设备制造业	湖南省	430000	长沙市	430100
157	2016	0.237911	23.7911	3	2.19722	0.0537681	20.92	1.79176	1.32979	5.3253	0	1	-0.069298	0	5.93224	C35	专用设备制造业	湖南省	430000	长沙市	430100
157	2017	0.232072	23.2072	3	2.3979	0.0493124	19.85	1.38629	1.60428	5.01	0	1	0.011439	1.09861	5.23644	C35	专用设备制造业	湖南省	430000	长沙市	430100
157	2018	0.206295	20.6295	1	2.89037	0.0429514	20.63	1.09861	2.10526	5.6147	0	1	0.014157	1.38629	4.56435	C35	专用设备制造业	湖南省	430000	长沙市	430100
157	2019	0.18433	18.433	2	2.94444	0.0439666	23.09	0	0	6.46	0	1	0.019725	1.38629	4.49981	C35	专用设备制造业	湖南省	430000	长沙市	430100
157	2020	0.243435	24.3435	2	3.29584	0.0391717	25.47	1.38629	1.54639	7.92	0	1	0.21131	1.79176	5.273	C35	专用设备制造业	湖南省	430000	长沙市	430100
157	2021	0.271292	27.1292	4	3.46574	0.0448449	27.82	1.38629	1.05263	9.1	0	1	0.217392	1.60944	5.65599	C35	专用设备制造业	湖南省	430000	长沙市	430100
157	2022	0.319769	31.9769	5	3.4012	0.0431034	29.71	2.3979	1.79533	10.16	0	1	-0.022676	1.60944	6.32436	C35	专用设备制造业	湖南省	430000	长沙市	430100
157	2023	0.262312	26.2312	5	3.7612	0.0388582	32.7	2.56495	3.38028	12.08	0	0	0.038474	1.60944	5.87493	C35	专用设备制造业	湖南省	430000	长沙市	430100
158	2011	0.0291363	2.91363	1	0	0.028494	0	0	0	0	0.2831	0	0.017283	0	2.30259	C17	纺织业	河北省	130000	石家庄市	130100
158	2012	0.0440001	4.40001	1	0.693147	0.0355683	0	0	0	0	0.2916	0	0.005302	0.693147	2.3979	C17	纺织业	河北省	130000	石家庄市	130100
158	2013	0.0353713	3.53713	1	0.693147	0.034429	0	0	0	0	0.26	0	0.006082	0	2.19722	C17	纺织业	河北省	130000	石家庄市	130100
158	2014	0.103994	10.3994	1	0.693147	0.0349716	0	0	0	0	0.2094	1	0.012841	0	2.19722	C17	纺织业	河北省	130000	石家庄市	130100
158	2015	0.140988	14.0988	1	3.82864	0.0244092	22.19	0	0	1.35	0.119	1	1.19611	0	0.693147	C17	纺织业	河北省	130000	石家庄市	130100
158	2016	0.158514	15.8514	1	3.66356	0.0200497	24.53	0	0	1.71	0.1062	1	0.057271	0.693147	2.3979	C17	纺织业	河北省	130000	石家庄市	130100
158	2017	0.167791	16.7791	1	4.35671	0.0191757	20.54	0	0	2.1	0.1258	1	0.046792	1.09861	2.3979	C17	纺织业	河北省	130000	石家庄市	130100
158	2018	0.134524	13.4524	3	4.8828	0.0234943	32.36	0	0	2.83	0.1575	0	0.013279	1.38629	1.79176	C17	纺织业	河北省	130000	石家庄市	130100
158	2019	0.2756	27.56	5	5.03695	0.0285578	37.57	0.693147	8.33333	3.17	0.1723	1	-0.028211	1.09861	2.56495	I65	软件和信息技术服务业	河北省	130000	石家庄市	130100
158	2020	0.221191	22.1191	5	5.03695	0.0457328	38.49	0	0	3.2	0.1677	1	0.019772	0	1.38629	I65	软件和信息技术服务业	河北省	130000	石家庄市	130100
158	2021	0.130977	13.0977	2	4.68213	0.0406573	47.69	0	0	3.35	0.1494	0	0.022218	1.09861	1.79176	I65	软件和信息技术服务业	河北省	130000	石家庄市	130100
158	2022	0.119783	11.9783	2	5.01063	0.0420268	46.29	0	0	3.5	0.1168	0	-0.037041	1.09861	0	I65	软件和信息技术服务业	河北省	130000	石家庄市	130100
158	2023	0.0984068	9.84068	2	4.85981	0.0421685	0	0	0	3.5	0.0924	0	-0.020846	1.09861	2.07944	I65	软件和信息技术服务业	河北省	130000	石家庄市	130100
159	2011	0.0082722	1.22037	1	0	0.0445842	0	0	0	1.69	0.096	0	0.173371	0	0	C25	石油加工、炼焦及核燃料加工业	新疆维吾尔自治区	650000	乌鲁木齐市	650100
159	2012	0.0080338	1.22037	1	0	0.0313335	0	0	0	2.09	0.0976	0	0.028091	0	0	F51	批发业	新疆维吾尔自治区	650000	乌鲁木齐市	650100
159	2013	0.0074664	1.22037	1	0	0.0345232	0	0	0	1.855	0.0854	0	-0.003884	0	0	F51	批发业	新疆维吾尔自治区	650000	乌鲁木齐市	650100
159	2014	0.0075929	1.22037	1	0	0.0345644	0	0	0	2.09	0.0817	0	0.051972	0	0	F51	批发业	新疆维吾尔自治区	650000	乌鲁木齐市	650100
159	2015	0.0067714	1.22037	1	0	0.0283025	0	0	0	1.79	0.0786	0	-0.000831	0	0	F51	批发业	新疆维吾尔自治区	650000	乌鲁木齐市	650100
159	2016	0.008475	1.22037	1	0	0.0216704	0	0	0	1.89	0.1286	0	0.010368	0	0	F51	批发业	新疆维吾尔自治区	650000	乌鲁木齐市	650100
159	2017	0.0278211	2.78211	1	0	0.0221776	0	0	0	2	0.1186	0	-0.049586	2.30259	0	F51	批发业	新疆维吾尔自治区	650000	乌鲁木齐市	650100
159	2018	0.0375467	3.75467	1	0	0.0237576	11.75	0	0	3.49	0.1266	0	0.022302	2.19722	0	F51	批发业	新疆维吾尔自治区	650000	乌鲁木齐市	650100
159	2019	0.0275571	2.75571	1	0	0.0223777	10.48	0	0	4.07	0.1188	0	0.020015	1.09861	0	F51	批发业	新疆维吾尔自治区	650000	乌鲁木齐市	650100
159	2020	0.0251049	2.51049	1	0	0.0246876	6.98	0	0	4.65	0.1008	0	0.004437	1.09861	0	F51	批发业	新疆维吾尔自治区	650000	乌鲁木齐市	650100
159	2021	0.0495064	4.95064	2	0.693147	0.0146489	14.26	0	0	2.01	0.0889	0	0.031828	1.60944	0	F51	批发业	新疆维吾尔自治区	650000	乌鲁木齐市	650100
159	2022	0.0411609	4.11609	2	0	0.0169793	23	0	0	2.06	0.101	0	0.15366	0.693147	0	F51	批发业	新疆维吾尔自治区	650000	乌鲁木齐市	650100
159	2023	0.0373744	3.73744	2	0	0.0140874	17.42	0	0	2.06	0.1119	0	-0.065623	0.693147	0	F51	批发业	新疆维吾尔自治区	650000	乌鲁木齐市	650100
301	2011	0.0424473	4.24473	2	1.38629	0.0625268	0	0	0	0	0.0797	0	0.005543	1.09861	0	S90	综合	江苏省	320000	苏州市	320500
301	2012	0.0316654	3.16654	1	1.09861	0.0874862	0	0	0	0	0.0736	0	0.052841	1.38629	0	D44	电力、热力生产和供应业	江苏省	320000	苏州市	320500
301	2013	0.0324899	3.24899	1	1.38629	0.0497111	0	0	0	0	0.0694	0	0.100097	1.38629	0	D44	电力、热力生产和供应业	江苏省	320000	苏州市	320500
301	2014	0.0386661	3.86661	1	1.09861	0.116739	0	0	0	0	0.0594	0	0.055272	2.07944	0	D44	电力、热力生产和供应业	江苏省	320000	苏州市	320500
301	2015	0.0507587	5.07587	1	2.3979	0.12355	0	0	0	0	0.0592	0	0.037071	1.79176	0	D44	电力、热力生产和供应业	江苏省	320000	苏州市	320500
301	2016	0.0613438	6.13438	2	2.89037	0.0736067	0	0	0	0	0.1273	0	0.068658	1.09861	0	D44	电力、热力生产和供应业	江苏省	320000	苏州市	320500
301	2017	0.046315	4.6315	1	2.19722	0.0415502	0	0	0	0	0.087	0	0.035542	1.94591	0	D44	电力、热力生产和供应业	江苏省	320000	苏州市	320500
301	2018	0.06223	6.223	1	2.07944	0.0357966	11.94	0	0	0	0.3847	0	0.963184	1.60944	0	C28	化学纤维制造业	江苏省	320000	苏州市	320500
301	2019	0.0607006	6.07006	1	2.07944	0.0408427	9.67	0	0	0	0.3811	0	-0.025221	1.60944	0	C28	化学纤维制造业	江苏省	320000	苏州市	320500
301	2020	0.0478665	4.78665	1	1.38629	0.0355625	9.44	0	0	0	0.2189	0	0.473715	1.79176	0	C28	化学纤维制造业	江苏省	320000	苏州市	320500
301	2021	0.0648143	6.48143	2	1.09861	0.0231409	9.23	0	0	9.25	0.2363	0	-0.0245	1.60944	0	C28	化学纤维制造业	江苏省	320000	苏州市	320500
301	2022	0.0543156	5.43156	2	1.38629	0.0251175	9.24	0	0	0.87	0.2399	0	0.212256	1.09861	0	C28	化学纤维制造业	江苏省	320000	苏州市	320500
301	2023	0.118636	11.8636	5	2.19722	0.025736	13.52	0	0	0.87	0.6489	0	-0.023467	1.38629	0	C28	化学纤维制造业	江苏省	320000	苏州市	320500
333	2013	0.215867	21.5867	1	2.70805	0.0343051	0	2.19722	1.01781	0.9479	0	1	0.17835	0	6.66823	C38	电气机械及器材制造业	广东省	440000	佛山市	440600
333	2014	0.255559	25.5559	3	3.78419	0.0285302	0	2.07944	2.07715	1.41	0.1623	1	0.170184	0.693147	5.82305	C38	电气机械及器材制造业	广东省	440000	佛山市	440600
333	2015	0.218977	21.8977	2	3.04452	0.02633	9.3	1.60944	2.8169	2.01	0.1454	1	0.225232	0	4.96284	C38	电气机械及器材制造业	广东省	440000	佛山市	440600
333	2016	0.270011	27.0011	2	2.77259	0.0402609	9.07	3.04452	5.71429	2.2579	0.1234	1	0.231032	0	5.86079	C38	电气机械及器材制造业	广东省	440000	佛山市	440600
333	2017	0.299678	29.9678	3	3.93183	0.0611311	10.33	3.09104	7.95455	2.85	0.0911	1	0.20222	0	5.57973	C38	电气机械及器材制造业	广东省	440000	佛山市	440600
333	2018	0.227519	22.7519	1	4.06044	0.0613826	10.74	1.60944	1.91388	3.27	0.0851	1	0.114915	0.693147	5.34711	C38	电气机械及器材制造业	广东省	440000	佛山市	440600
333	2019	0.248088	24.8088	2	3.93183	0.0512797	10.18	1.79176	2.38095	3.28	0.0717	1	0.162692	1.38629	5.35186	C38	电气机械及器材制造业	广东省	440000	佛山市	440600
333	2020	0.245064	24.5064	2	4.26268	0.0427945	10.77	1.60944	4.44444	3.72	0.0617	1	0.155736	1.38629	4.51086	C38	电气机械及器材制造业	广东省	440000	佛山市	440600
333	2021	0.258572	25.8572	3	4.65396	0.0442666	10.92	1.38629	4.22535	3.32	0.0589	1	0.085224	2.19722	4.27667	C38	电气机械及器材制造业	广东省	440000	佛山市	440600
333	2022	0.262208	26.2208	3	4.40672	0.0400159	12.5	1.38629	6.66667	3.93	0.0617	1	0.126822	2.48491	3.82864	C38	电气机械及器材制造业	广东省	440000	佛山市	440600
333	2023	0.140175	14.0175	4	4.17439	0.0379759	11.69	0	0	3.65	0.0637	0	0.147283	2.19722	3.49651	C38	电气机械及器材制造业	广东省	440000	佛山市	440600
338	2011	0.208349	20.8349	3	0.693147	0.0187749	0	1.79176	6.66667	3.11	0.1568	1	0.23674	0	4.33073	C36	汽车制造业	山东省	370000	潍坊市	370700
338	2012	0.202515	20.2515	1	0	0.0325731	0	2.30259	8.03571	5.15	0.1738	1	0.086375	0	4.72739	C36	汽车制造业	山东省	370000	潍坊市	370700
338	2013	0.213054	21.3054	1	0	0.0289529	0	2.77259	7.8534	0	0.1675	1	0.093253	0	5.25749	C36	汽车制造业	山东省	370000	潍坊市	370700
338	2014	0.254507	25.4507	1	1.09861	0.1056	0	3.3673	5.14706	0	0.1845	1	0.190143	0.693147	6.30079	C36	汽车制造业	山东省	370000	潍坊市	370700
338	2015	0.246145	24.6145	1	0	0.111953	7.11	3.2581	6.39386	0	0.206	1	-0.005136	0.693147	5.97126	C36	汽车制造业	山东省	370000	潍坊市	370700
338	2016	0.272608	27.2608	2	0.693147	0.154661	7.55	3.58352	7.2314	0	0.1573	1	0.062586	0	6.18415	C36	汽车制造业	山东省	370000	潍坊市	370700
338	2017	0.266952	26.6953	2	1.94591	0.125713	8.45	2.94444	6.74157	0	0.1427	1	0.27287	0.693147	5.59099	C36	汽车制造业	山东省	370000	潍坊市	370700
338	2018	0.309248	30.9248	2	1.60944	0.113503	9.1	3.63759	7.37052	0	0.1435	1	0.10477	3.09104	6.22059	C36	汽车制造业	山东省	370000	潍坊市	370700
338	2019	0.317725	31.7724	3	1.38629	0.0989546	9.36	3.8712	8.7037	0	0.1111	1	0.120711	2.07944	6.29342	C36	汽车制造业	山东省	370000	潍坊市	370700
338	2020	0.384717	36.9914	3	2.48491	0.0879989	6.72	5.17615	14.7157	0	0.1172	1	0.152757	2.19722	7.08757	C36	汽车制造业	山东省	370000	潍坊市	370700
338	2021	0.418215	36.9914	6	2.77259	0.0754687	12.62	5.1299	12.0258	0	0.1198	1	0.27587	2.07944	7.2428	C36	汽车制造业	山东省	370000	潍坊市	370700
338	2022	0.442546	36.9914	7	3.85015	0.0775012	15.93	5.11199	10.2167	0	0.129	1	-0.013308	2.30259	7.38771	C36	汽车制造业	山东省	370000	潍坊市	370700
338	2023	0.351626	35.1626	7	3.21888	0.0690246	16.81	4.75359	10.2313	0	0.1319	0	0.082365	2.19722	7.02554	C36	汽车制造业	山东省	370000	潍坊市	370700
400	2011	0.138601	13.8601	3	2.3979	0.0106564	0	0	0	7.13	0.1188	1	0.075676	0.693147	0	C38	电气机械及器材制造业	河南省	410000	许昌市	411000
400	2012	0.0380882	3.80882	1	2.07944	0.0065531	0	0	0	7.98	0.1505	0	0.074409	0	0	C38	电气机械及器材制造业	河南省	410000	许昌市	411000
400	2013	0.283783	28.3783	1	2.19722	0.0047556	0	0.693147	100	9.2668	0.121	0	0.197544	0	0.693147	C38	电气机械及器材制造业	河南省	410000	许昌市	411000
400	2014	0.282059	28.2059	3	2.07944	0.00713	0	1.79176	35.7143	11.42	0.0954	1	0.312695	0	2.70805	C38	电气机械及器材制造业	河南省	410000	许昌市	411000
400	2015	0.28097	28.097	3	1.38629	0.0083359	38.77	1.60944	25	12.2	0.0794	1	0.102255	0.693147	2.83321	C38	电气机械及器材制造业	河南省	410000	许昌市	411000
400	2016	0.316766	31.6766	3	2.3979	0.0155914	0.3954	2.56495	70.5882	13.14	0.0722	0	0.098797	0	2.89037	C38	电气机械及器材制造业	河南省	410000	许昌市	411000
400	2017	0.32461	32.461	3	2.30259	0.0256598	37.14	1.79176	35.7143	12.3278	0.0783	1	0.076049	1.38629	2.70805	C38	电气机械及器材制造业	河南省	410000	许昌市	411000
400	2018	0.399048	36.9914	3	2.48491	0.033759	40.76	1.79176	71.4286	13.3395	0.0841	1	0.028097	0.693147	2.07944	C38	电气机械及器材制造业	河南省	410000	许昌市	411000
400	2019	0.337397	33.7397	4	2.56495	0.0414161	40.55	1.38629	42.8571	13.47	0.0865	1	0.038766	0.693147	2.07944	C38	电气机械及器材制造业	河南省	410000	许昌市	411000
400	2020	0.292918	29.2918	3	3.3673	0.0477618	44.15	0.693147	33.3333	13.88	0.0951	1	0.027521	0.693147	1.38629	C38	电气机械及器材制造业	河南省	410000	许昌市	411000
400	2021	0.28118	28.118	2	2.83321	0.0453988	45.58	0.693147	33.3333	15.07	0.0861	1	0.104075	1.09861	1.38629	C38	电气机械及器材制造业	河南省	410000	许昌市	411000
400	2022	0.297389	29.7389	2	2.48491	0.040317	44.52	1.09861	33.3333	17.71	0.0857	1	0.073802	1.38629	1.94591	C38	电气机械及器材制造业	河南省	410000	许昌市	411000
400	2023	0.155864	15.5864	6	2.70805	0.0363618	44.27	0	0	20.42	0.0804	0	0.05369	1.09861	0	C38	电气机械及器材制造业	河南省	410000	许昌市	411000
401	2011	0.154697	15.4697	6	0	0.0481307	0	0	0	0	0.485	1	0.416371	0.693147	0	C30	非金属矿物制品业	河北省	130000	唐山市	130200
401	2012	0.164477	16.4477	6	0	0.0505928	0	0	0	0	0.5805	1	0.015792	1.38629	0	C30	非金属矿物制品业	河北省	130000	唐山市	130200
401	2013	0.173141	17.3141	6	0	0.0589046	0	0	0	0.2159	0.6071	1	0.039928	2.19722	0	C30	非金属矿物制品业	河北省	130000	唐山市	130200
401	2014	0.167519	16.7519	6	0	0.0645741	0	0	0	0.38	0.5784	1	-0.033287	1.60944	0	C30	非金属矿物制品业	河北省	130000	唐山市	130200
401	2015	0.172019	17.2019	6	0.693147	0.0697342	0.41	0	0	0.39	0.596	1	-0.156587	1.09861	0	C30	非金属矿物制品业	河北省	130000	唐山市	130200
401	2016	0.142578	14.2578	5	0	0.0695253	0.36	0	0	0.48	0.5623	1	-0.014574	0	0	C30	非金属矿物制品业	河北省	130000	唐山市	130200
401	2017	0.126449	12.6449	3	0	0.0686659	0.4	0	0	0.62	0.572	1	0.009469	0.693147	0	C30	非金属矿物制品业	河北省	130000	唐山市	130200
401	2018	0.173165	17.3165	6	0.693147	0.0648521	1.35	0	0	0.83	0.4519	1	0.214758	1.79176	0	C30	非金属矿物制品业	河北省	130000	唐山市	130200
401	2019	0.167695	16.7695	6	0	0.0857546	3.1	0	0	0.6	0.537	1	-0.015002	1.38629	0	C30	非金属矿物制品业	河北省	130000	唐山市	130200
401	2020	0.196019	19.6018	7	1.38629	0.0913419	2.85	0	0	0.7	0.5316	1	0.114828	1.60944	0	C30	非金属矿物制品业	河北省	130000	唐山市	130200
401	2021	0.170839	17.0839	2	1.09861	0.0978989	2.59	0.693147	33.3333	0.8	0.5362	0	0.050682	1.79176	1.38629	C30	非金属矿物制品业	河北省	130000	唐山市	130200
401	2022	0.0885163	8.85163	3	1.94591	0.102048	2.76	0	0	0.97	0.5234	0	-0.03481	1.79176	0	C30	非金属矿物制品业	河北省	130000	唐山市	130200
401	2023	0.0866261	8.66261	3	1.94591	0.113382	2.85	0	0	1.15	0.5398	0	-0.061534	1.38629	0	C30	非金属矿物制品业	河北省	130000	唐山市	130200
402	2011	0.0730745	7.30745	1	0	0.0116753	0	0	0	0	0.0457	1	0.072629	0	0	K70	房地产业	北京市	110000	北京市	110000
402	2012	0.0816285	8.16285	1	0	0.0115684	0	0	0	7.78	0.0377	1	0.137881	0	0	K70	房地产业	北京市	110000	北京市	110000
402	2013	0.0823314	8.23314	1	0	0.0107415	0	0	0	8.5576	0.0342	1	0.162034	0	0	K70	房地产业	北京市	110000	北京市	110000
402	2014	0.097814	9.7814	1	1.38629	0.009235	0	0	0	9.01	0.0328	1	0.095978	0	0	K70	房地产业	北京市	110000	北京市	110000
402	2015	0.103666	10.3666	1	1.94591	0.0074883	0	0	0	9.07	0.0273	1	0.082106	0	0	K70	房地产业	北京市	110000	北京市	110000
402	2016	0.0955253	9.55253	1	1.38629	0.0054502	0	0	0	7.52	0.0233	1	0.07337	0	0	K70	房地产业	北京市	110000	北京市	110000
402	2017	0.0881469	8.81469	1	0.693147	0.0047883	0	0	0	7.79	0.0209	1	0.082706	0	0	K70	房地产业	北京市	110000	北京市	110000
402	2018	0.0921514	9.21514	2	0	0.0038612	0	0	0	8.21	0.0173	1	0.103606	0	0	K70	房地产业	北京市	110000	北京市	110000
402	2019	0.0894384	8.94384	1	0.693147	0.0034449	0	0	0	9.18	0.0154	1	0.047923	0	0	K70	房地产业	北京市	110000	北京市	110000
402	2020	0.0228924	2.28924	1	1.09861	0.0031835	0	0	0	8.85	0.0156	0	0.021137	0	0	K70	房地产业	北京市	110000	北京市	110000
402	2021	0.0608545	6.08545	3	1.94591	0.0034193	0	0	0	9.02	0.0175	0	0.070107	0.693147	0	K70	房地产业	北京市	110000	北京市	110000
402	2022	0.0826867	8.26867	5	1.79176	0.002528	0	0	0	9.95	0.0164	0	-0.004104	0.693147	0	K70	房地产业	北京市	110000	北京市	110000
402	2023	0.0753836	7.53836	6	0	0.0025634	0	0	0	10.77	0.0168	0	-0.052118	0.693147	0	K70	房地产业	北京市	110000	北京市	110000
403	2018	0.0198626	1.98626	1	0	0.0527632	6.21	0	0	0	0.3135	0	0.142586	0	0	C27	医药制造业	山西省	140000	太原市	140100
403	2019	0.0077172	1.22037	1	0	0.042637	7.25	0	0	0	0	0	0.289703	0	0	C27	医药制造业	山西省	140000	太原市	140100
403	2020	0.079298	7.9298	1	0	0.0396099	8.87	0	0	0	0	1	0.206215	0	0	C27	医药制造业	山西省	140000	太原市	140100
403	2021	0.0960443	9.60443	1	0	0.0282249	13.76	0	0	0	0	1	5.5443	1.60944	0	C27	医药制造业	山西省	140000	太原市	140100
403	2022	0.0912128	9.12128	1	0	0.0241177	7.64	0	0	0	0	1	0.084295	1.60944	0	C27	医药制造业	山西省	140000	太原市	140100
403	2023	0.0234156	2.34156	2	0	0.0246328	6.64	0	0	0	0	0	0.081727	0.693147	0	C27	医药制造业	山西省	140000	太原市	140100
404	2011	0.0898768	8.98768	1	0	0.0264037	0	0	0	0.57	0.1848	1	0.060034	0	1.38629	C34	通用设备制造业	江西省	360000	景德镇市	360200
404	2012	0.0938848	9.38848	1	0	0.0323374	0	0	0	0.7	0.1763	1	0.184906	0.693147	1.09861	C34	通用设备制造业	江西省	360000	景德镇市	360200
404	2013	0.0972098	9.72098	1	0.693147	0.0240588	0	0	0	0.9637	0.1455	1	1.22682	0.693147	0.693147	C34	通用设备制造业	江西省	360000	景德镇市	360200
404	2014	0.130226	13.0227	3	0.693147	0.0229381	0	0	0	0.9582	0.1778	1	0.084432	0	2.83321	C34	通用设备制造业	江西省	360000	景德镇市	360200
404	2015	0.0992436	9.92436	2	0	0.0234164	9.9	0	0	1.17	0.1911	1	0.099022	0	0	C34	通用设备制造业	江西省	360000	景德镇市	360200
404	2016	0.118358	11.8358	2	0	0.0193588	10.39	0	0	1.365	0.1676	1	0.096316	0	2.77259	C34	通用设备制造业	江西省	360000	景德镇市	360200
404	2017	0.146715	14.6715	3	0.693147	0.0184896	10.32	0	0	1.29	0.1388	1	0.219237	1.38629	2.63906	C34	通用设备制造业	江西省	360000	景德镇市	360200
404	2018	0.159851	15.9851	3	2.63906	0.0304379	9.09	0	0	1.06	0.1559	1	0.063575	0	3.13549	C34	通用设备制造业	江西省	360000	景德镇市	360200
404	2019	0.164605	16.4605	3	2.30259	0.0290846	7.3	0	0	1.12	0.1506	1	0.011148	1.09861	3.21888	C34	通用设备制造业	江西省	360000	景德镇市	360200
404	2020	0.177804	17.7804	2	2.30259	0.0253597	6.91	0.693147	2.17391	1.01	0.1348	1	0.036274	0.693147	3.85015	C34	通用设备制造业	江西省	360000	景德镇市	360200
404	2021	0.131724	13.1724	1	1.94591	0.024299	7.31	0	0	1.03	0.124	1	0.045921	0.693147	2.99573	C34	通用设备制造业	江西省	360000	景德镇市	360200
404	2022	0.137133	13.7133	2	1.38629	0.0219551	9.93	0	0	1.16	0.1216	1	0.057608	0.693147	2.77259	C34	通用设备制造业	江西省	360000	景德镇市	360200
404	2023	0.0582245	5.82245	1	2.30259	0.0146613	4.86	0	0	1.06	0.1014	0	0.063169	0.693147	2.48491	C34	通用设备制造业	江西省	360000	景德镇市	360200
407	2011	0.0972155	9.72155	1	0	0.0505214	0	0	0	0	0.2407	1	-0.036764	1.09861	0.693147	C29	橡胶和塑料制品业	山东省	370000	济南市	370100
407	2012	0.0280826	2.80826	1	0	0.0588209	0	0	0	4.77	0.2524	0	-0.062381	1.09861	0	C26	化学原料及化学制品制造业	山东省	370000	济南市	370100
407	2013	0.0462737	4.62737	2	0	0.0538042	0	0	0	6.24	0.2302	0	0.019682	0.693147	1.38629	C26	化学原料及化学制品制造业	山东省	370000	济南市	370100
407	2014	0.025877	2.5877	1	0	0.0456045	0	0	0	4.77	0.1043	0	0.480539	0.693147	1.09861	C26	化学原料及化学制品制造业	山东省	370000	济南市	370100
407	2015	0.0197642	1.97642	1	0.693147	0.0465121	0	0	0	3.19	0	0	0.036337	0.693147	0	C26	化学原料及化学制品制造业	山东省	370000	济南市	370100
407	2016	0.0262504	2.62504	1	0	0.0225021	0	0	0	2.86	0.203	0	0.199942	1.60944	0	D45	燃气生产和供应业	山东省	370000	济南市	370100
407	2017	0.0285758	2.85758	1	0	0.0212699	0	0	0	2.23	0.2095	0	0.0712	1.94591	0	D45	燃气生产和供应业	山东省	370000	济南市	370100
407	2018	0.107163	10.7163	1	0	0.0192292	13	0	0	1.6	0.2281	1	0.014375	1.79176	0	D45	燃气生产和供应业	山东省	370000	济南市	370100
407	2019	0.106666	10.6666	1	0.693147	0.017432	1.23	0	0	1.56	0.244	1	0.063837	1.79176	0	D45	燃气生产和供应业	山东省	370000	济南市	370100
407	2020	0.108383	10.8383	1	0.693147	0.0167867	4.59	0	0	1.59	0.2653	1	-0.003637	1.60944	0	D45	燃气生产和供应业	山东省	370000	济南市	370100
407	2021	0.112423	11.2423	2	0	0.0162393	5.16	0	0	1.39	0.2695	1	0.041453	1.60944	0	D45	燃气生产和供应业	山东省	370000	济南市	370100
407	2022	0.113378	11.3378	2	0	0.0162104	6.05	0	0	1.55	0.2728	1	0.024438	1.60944	0	D45	燃气生产和供应业	山东省	370000	济南市	370100
407	2023	0.115633	11.5633	2	0.693147	0.0181946	9.16	0	0	1.31	0.283	1	0.050559	0.693147	0	D45	燃气生产和供应业	山东省	370000	济南市	370100
408	2012	0.0098035	1.22037	1	0	0.0196696	0	0	0	3.13	0.1293	0	0.028084	0	0	F51	批发业	河北省	130000	邯郸市	130400
408	2013	0.0079083	1.22037	1	0	0.0152152	0	0	0	2.9126	0.0938	0	0.092629	0	0	F51	批发业	河北省	130000	邯郸市	130400
408	2014	0.0026772	1.22037	1	0	0.0144762	0	0	0	0	0.0466	0	-0.289228	0	0	F51	批发业	河北省	130000	邯郸市	130400
408	2015	0.0025415	1.22037	1	0	0.0142437	0	0	0	0	0.0436	0	-0.440286	0	0	F51	批发业	河北省	130000	邯郸市	130400
408	2017	0.041448	4.1448	1	0	0.045848	0	0	0	0.34	0.4222	0	0.091286	2.56495	0	C26	化学原料及化学制品制造业	青海省	630000	格尔木市	632801
408	2018	0.0379634	3.79634	1	0	0.0347121	0.68	0	0	0.3509	0.3368	0	0.137776	2.56495	0	C26	化学原料及化学制品制造业	青海省	630000	格尔木市	632801
408	2019	0.0376316	3.76316	1	0	0.0320666	1.65	0	0	0.41	0.3922	0	0.059757	2.19722	0	C26	化学原料及化学制品制造业	青海省	630000	格尔木市	632801
408	2021	0.108695	10.8695	1	0	0.0348627	2.58	0	0	0.97	0.3047	1	0.194093	2.48491	0	C26	化学原料及化学制品制造业	青海省	630000	格尔木市	632801
408	2022	0.110305	11.0305	1	0	0.0262112	4.8	0	0	1.21	0.2108	1	0.282417	2.94444	0	C26	化学原料及化学制品制造业	青海省	630000	格尔木市	632801
408	2023	0.148752	14.8752	4	0.693147	0.0232844	4.61	0	0	2.01	0.2031	1	0.076416	2.56495	0	C26	化学原料及化学制品制造业	青海省	630000	格尔木市	632801
409	2013	0.0309109	3.09109	1	0	0.301453	0	0	0	2.535	0.2759	0	0.162598	0	0	B08	黑色金属矿采选业	山东省	370000	济南市	370100
409	2014	0.0336422	3.36422	1	0	0.39517	0	0	0	1.79	0.2315	0	0.157143	0	0	B08	黑色金属矿采选业	山东省	370000	济南市	370100
409	2015	0.0276667	2.76667	1	0	0.246375	0	0	0	0.85	0.1719	0	0.218862	0.693147	0	B08	黑色金属矿采选业	山东省	370000	济南市	370100
409	2016	0.0383665	3.83665	1	1.09861	0.224418	0	0	0	1.45	0.1541	0	-0.124585	0.693147	0	S90	综合	山东省	370000	济南市	370100
409	2017	0.0357375	3.57375	1	0	0.208494	0	0	0	1.49	0.176	0	-0.198076	1.79176	0	S90	综合	山东省	370000	济南市	370100
409	2021	0.0811388	8.11388	1	3.71357	0.0097408	22.89	0	0	10.89	0.1563	0	0.051954	0	0.693147	I65	软件和信息技术服务业	山东省	370000	济南市	370100
409	2022	0.096658	9.6658	1	4.46591	0.027097	41.62	0	0	11.24	0.0859	0	1.72722	0	0	I65	软件和信息技术服务业	山东省	370000	济南市	370100
409	2023	0.0912476	9.12476	1	5.03695	0.0234317	25.63	0	0	11.64	0.0797	0	0.071495	0	0	I65	软件和信息技术服务业	山东省	370000	济南市	370100
410	2011	0.0288336	2.88336	1	0	0.0377556	0	0	0	3.4	0.116	0	0.051005	0	2.56495	C34	通用设备制造业	辽宁省	210000	沈阳市	210100
410	2012	0.0382651	3.82651	1	1.09861	0.0447816	0	0	0	4.39	0.1002	0	0.004348	0	2.07944	C34	通用设备制造业	辽宁省	210000	沈阳市	210100
410	2013	0.0318687	3.18687	1	0	0.0465922	0	0	0	4.7502	0.1274	0	0.665271	0	2.63906	C34	通用设备制造业	辽宁省	210000	沈阳市	210100
410	2014	0.0636687	6.36686	1	0	0.0456742	0	0.693147	4.34783	4.64	0.0949	0	0.006962	0	3.17805	C34	通用设备制造业	辽宁省	210000	沈阳市	210100
410	2015	0.028339	2.8339	1	0	0.0490708	8.21	0	0	4.31	0.0821	0	-0.17612	0	1.60944	C34	通用设备制造业	辽宁省	210000	沈阳市	210100
410	2016	0.0317958	3.17958	1	0	0.0437937	8.82	0	0	4.04	0.1138	0	-0.63527	0	1.94591	C34	通用设备制造业	辽宁省	210000	沈阳市	210100
410	2018	0.0502024	5.02024	1	1.09861	0.0395966	8.76	0	0	4.22	0.1677	0	-0.852934	0	2.56495	C34	通用设备制造业	辽宁省	210000	沈阳市	210100
410	2023	0.0813245	8.13245	3	1.38629	0.0377791	7.92	0	0	4.3	0.2181	0	0.014695	0	3.13549	C34	通用设备制造业	辽宁省	210000	沈阳市	210100
411	2011	0.0993607	9.93607	1	2.3979	0.0095641	0	0	0	0	0.0519	1	1.00056	0	0	F51	批发业	浙江省	330000	杭州市	330100
411	2012	0.102272	10.2272	1	2.30259	0.0184158	0	0	0	3.2	0.0474	1	0.142738	0	0	F51	批发业	浙江省	330000	杭州市	330100
411	2013	0.103082	10.3082	1	1.94591	0.0157051	0	0	0	3.1881	0.0459	1	0.188502	0	0.693147	F51	批发业	浙江省	330000	杭州市	330100
411	2014	0.105849	10.5849	1	2.63906	0.0167719	0	0	0	2.98	0.0539	1	0.097572	0	0	F51	批发业	浙江省	330000	杭州市	330100
411	2015	0.0389969	3.89969	1	2.99573	0.0138854	0	0	0	3.35	0.0433	0	0.108906	0	0	F51	批发业	浙江省	330000	杭州市	330100
411	2016	0.0375929	3.75929	1	2.77259	0.0122016	0	0	0	3.48	0.0681	0	0.119571	0	0	F51	批发业	浙江省	330000	杭州市	330100
411	2017	0.048133	4.8133	1	3.7612	0.0126699	0.37	0	0	3.25	0.0613	0	0.122817	0	0	F51	批发业	浙江省	330000	杭州市	330100
411	2018	0.0403625	4.03625	1	3.04452	0.012048	0.38	0	0	3.38	0.0593	0	0.09353	0	0	F51	批发业	浙江省	330000	杭州市	330100
411	2019	0.0455218	4.55218	1	3.55535	0.0101647	0.4	0	0	3.36	0.0516	0	0.426278	0	0	F51	批发业	浙江省	330000	杭州市	330100
411	2020	0.0467013	4.67013	1	3.66356	0.0092269	0.4	0	0	3.54	0.048	0	0.078864	0	0	F51	批发业	浙江省	330000	杭州市	330100
411	2021	0.12836	12.836	1	3.29584	0.0117667	1.04	0	0	3.64	0.0651	1	0.096615	1.60944	0	F51	批发业	浙江省	330000	杭州市	330100
411	2022	0.125961	12.5961	1	3.21888	0.0111904	1.47	0	0	3.96	0.0573	1	0.104511	1.38629	0	F51	批发业	浙江省	330000	杭州市	330100
411	2023	0.0575264	5.75264	1	2.99573	0.0100802	0.68	0	0	4.51	0.0528	0	0.233344	1.94591	0	F51	批发业	浙江省	330000	杭州市	330100
413	2011	0.0132367	1.32367	1	0	0.0307349	0	0	0	0	0.1414	0	0.089372	0.693147	0	C39	计算机、通信和其他电子设备制造业	河北省	130000	石家庄市	130100
413	2012	0.0079724	1.22037	1	0	0.0282512	0	0	0	4.69	0.0244	0	0.937274	0	0	C39	计算机、通信和其他电子设备制造业	河北省	130000	石家庄市	130100
413	2013	0.0067626	1.22037	1	0	0.0124862	0	0	0	4.4646	0.0156	0	10.6704	0	0	C39	计算机、通信和其他电子设备制造业	河北省	130000	石家庄市	130100
413	2014	0.0840708	8.40708	1	0	0.0176967	0	0	0	5.5	0.1571	1	0.102414	0	0	C39	计算机、通信和其他电子设备制造业	河北省	130000	石家庄市	130100
413	2015	0.087915	8.7915	1	0	0.0160525	7.72	0	0	1.19	0.2396	1	0.564017	0	0	C39	计算机、通信和其他电子设备制造业	河北省	130000	石家庄市	130100
413	2016	0.0877134	8.77134	1	0	0.0123476	12.23	0	0	0	0.1912	1	0.584268	0	0	C39	计算机、通信和其他电子设备制造业	河北省	130000	石家庄市	130100
413	2017	0.124458	12.4458	3	0.693147	0.0144272	17.61	0	0	3.25	0.1639	1	0.314939	0	0	C39	计算机、通信和其他电子设备制造业	河北省	130000	石家庄市	130100
413	2018	0.129483	12.9483	1	1.79176	0.0158034	21.98	0	0	3.16	0.1327	1	0.038981	1.60944	0	C39	计算机、通信和其他电子设备制造业	河北省	130000	石家庄市	130100
413	2019	0.124969	12.4969	1	0.693147	0.0214553	21.43	0	0	3.83	0.1404	1	-0.057078	1.79176	0.693147	C39	计算机、通信和其他电子设备制造业	河北省	130000	石家庄市	130100
413	2020	0.0852361	8.52361	1	1.94591	0.0635821	18.52	0	0	2.17	0.1463	0	-0.09208	1.60944	3.52636	C39	计算机、通信和其他电子设备制造业	河北省	130000	石家庄市	130100
413	2021	0.17413	17.413	3	1.79176	0.0592602	16.82	1.79176	7.8125	1.56	0.1181	0	-0.095955	1.38629	4.17439	C39	计算机、通信和其他电子设备制造业	河北省	130000	石家庄市	130100
413	2022	0.127837	12.7837	3	1.79176	0.0574687	15.42	0.693147	4.7619	1.38	0.1428	0	-0.086425	1.38629	3.09104	C39	计算机、通信和其他电子设备制造业	河北省	130000	石家庄市	130100
415	2011	0.048928	4.8928	1	0	3.48e-05	0	0	0	42.86	0.0002	0	0.250422	0	0	L71	租赁业	新疆维吾尔自治区	650000	乌鲁木齐市	650100
415	2012	0.0654045	6.54045	1	0	0.0025026	0	0	0	47.49	0.2816	0	-0.079313	0	0	L71	租赁业	新疆维吾尔自治区	650000	乌鲁木齐市	650100
415	2013	0.0648438	6.48438	1	0.693147	0.0010257	0	0	0	29.6223	0.4459	0	-0.447032	0.693147	0	L71	租赁业	新疆维吾尔自治区	650000	乌鲁木齐市	650100
415	2014	0.130745	13.0745	1	0.693147	0.0006936	0	0	0	32.16	0.403	1	0.50235	0	0	L71	租赁业	新疆维吾尔自治区	650000	乌鲁木齐市	650100
415	2015	0.136331	13.6332	1	1.94591	0.0049152	0	0	0	26.23	0.3629	1	1.58281	0	0	L71	租赁业	新疆维吾尔自治区	650000	乌鲁木齐市	650100
415	2016	0.142199	14.2199	1	0.693147	0.0027004	0	0	0	37.34	0.5414	1	0.159761	0	0	L71	租赁业	新疆维吾尔自治区	650000	乌鲁木齐市	650100
415	2017	0.140778	14.0778	1	0.693147	0.001549	0	0	0	34.13	0.6002	1	-0.061558	0	0	L71	租赁业	新疆维吾尔自治区	650000	乌鲁木齐市	650100
415	2018	0.141502	14.1502	1	0.693147	0.001343	0	0	0	33.5	0.6367	1	0.555683	0	0	L71	租赁业	新疆维吾尔自治区	650000	乌鲁木齐市	650100
415	2019	0.153283	15.3283	2	0	0.0011351	0	0	0	31.6	0.7476	1	-0.009368	0.693147	0	L71	租赁业	新疆维吾尔自治区	650000	乌鲁木齐市	650100
415	2020	0.152389	15.2389	2	0	0.0007638	0	0	0	30.72	0.7511	1	-0.238626	0.693147	0	L71	租赁业	新疆维吾尔自治区	650000	乌鲁木齐市	650100
415	2021	0.154345	15.4345	2	0.693147	0.0004211	0	0	0	30.59	0.7628	1	-0.040289	0	0	L71	租赁业	新疆维吾尔自治区	650000	乌鲁木齐市	650100
415	2022	0.14039	14.039	2	0	0.0001304	0	0	0	25.04	0.7613	1	0.085098	0	0	L71	租赁业	新疆维吾尔自治区	650000	乌鲁木齐市	650100
415	2023	0.0735418	7.35418	2	0	0.0001422	0	0	0	27.7	0.7791	0	0.05408	0	0	L71	租赁业	新疆维吾尔自治区	650000	乌鲁木齐市	650100
416	2011	0.0731956	7.31956	1	0	0.0002659	0	0	0	0	0.0653	1	0.035271	0	0	F52	零售业	山东省	370000	青岛市	370200
416	2012	0.0836112	8.36112	1	0	0.0001633	0	0	0	9.43	0.0568	1	0.074903	0	0	F52	零售业	山东省	370000	青岛市	370200
416	2013	0.0972978	9.72978	2	1.09861	9.77e-05	0	0	0	1.1111	0.0551	1	-0.02856	0	0	F52	零售业	山东省	370000	青岛市	370200
416	2014	0.124334	12.4334	2	1.94591	0	0	0	0	16.9492	0.0486	1	-0.036486	0	0	F52	零售业	山东省	370000	青岛市	370200
417	2011	0.0293777	2.93777	1	1.79176	0.062457	0	0	0	0.26	0.1514	0	0.623993	0	0	F52	零售业	安徽省	340000	合肥市	340100
417	2012	0.016015	1.6015	1	0	0.0561747	0	0	0	0.26	0.1677	0	0.144157	0.693147	0	F52	零售业	安徽省	340000	合肥市	340100
417	2013	0.0438351	4.38351	1	2.07944	0.108933	0	0	0	0.2345	0.1356	0	0.125116	1.09861	0	F52	零售业	安徽省	340000	合肥市	340100
417	2014	0.0395367	3.95367	1	1.94591	0.117048	0	0	0	0.28	0.138	0	0.076409	0.693147	0	F52	零售业	安徽省	340000	合肥市	340100
417	2015	0.0448001	4.48001	1	1.79176	0.119867	0	0	0	0.3	0.16	0	0.047557	1.38629	0	F52	零售业	安徽省	340000	合肥市	340100
417	2016	0.0395011	3.95011	1	1.38629	0.110522	0	0	0	0.3008	0.1511	0	0.062602	1.38629	0	F52	零售业	安徽省	340000	合肥市	340100
417	2017	0.112223	11.2223	1	1.79176	0.0994569	0	0	0	0.39	0.1688	1	0.044104	1.09861	0	F52	零售业	安徽省	340000	合肥市	340100
417	2018	0.121378	12.1378	1	2.30259	0.0926656	0	0	0	0.46	0.2056	1	0.032732	1.38629	0	F52	零售业	安徽省	340000	合肥市	340100
417	2019	0.112237	11.2237	1	1.38629	0.111522	0	0	0	0.53	0.1978	1	0.061041	1.38629	0	F52	零售业	安徽省	340000	合肥市	340100
417	2020	0.107909	10.7909	1	1.60944	0.105534	0	0	0	0.61	0.1822	1	0.023954	0.693147	0	F52	零售业	安徽省	340000	合肥市	340100
417	2021	0.125773	12.5773	3	1.38629	0.0884689	0	0	0	0.71	0.1467	1	0.0395	0.693147	0	F52	零售业	安徽省	340000	合肥市	340100
417	2022	0.128044	12.8043	3	2.19722	0.0846782	0	0	0	0.71	0.1351	1	0.032486	0	0	F52	零售业	安徽省	340000	合肥市	340100
417	2023	0.0686554	6.86555	3	3.2581	0.0813181	0	0	0	0.88	0.1256	0	0.072554	0	0	F52	零售业	安徽省	340000	合肥市	340100
419	2011	0.0389649	3.89649	1	1.60944	0.0839046	0	0	0	1.11	0.3899	0	0.86347	0	0	F52	零售业	湖南省	430000	长沙市	430100
419	2012	0.0394397	3.94397	1	1.38629	0.0782955	0	0	0	0	0.3548	0	0.041958	0.693147	0	F52	零售业	湖南省	430000	长沙市	430100
419	2013	0.0647643	6.47643	2	2.83321	0.0736388	0	0	0	0	0.3178	0	0.052286	0.693147	0	F52	零售业	湖南省	430000	长沙市	430100
419	2014	0.0458129	4.58129	1	2.19722	0.0719287	0	0	0	0	0.3013	0	0.057745	0.693147	0	F52	零售业	湖南省	430000	长沙市	430100
419	2015	0.0416214	4.16214	1	2.3979	0.0803428	0	0	0	0	0.2769	0	0.018297	0	0	F52	零售业	湖南省	430000	长沙市	430100
419	2016	0.043613	4.3613	1	2.48491	0.0758446	0	0	0	0	0.3099	0	0.059038	0	0	F52	零售业	湖南省	430000	长沙市	430100
419	2017	0.037701	3.7701	1	2.07944	0.0697178	0	0	0	0	0.2808	0	0.053857	0	0	F52	零售业	湖南省	430000	长沙市	430100
419	2018	0.0406145	4.06145	1	2.07944	0.05645	0	0	0	0	0.2239	0	0.356311	0.693147	0	F52	零售业	湖南省	430000	长沙市	430100
419	2019	0.0734921	7.34921	4	2.07944	0.0524446	0	0	0	0	0.2059	0	0.069663	0.693147	0	F52	零售业	湖南省	430000	长沙市	430100
419	2020	0.0674027	6.74026	4	1.60944	0.0480854	0	0	0	0	0.1876	0	0.088308	0.693147	0	F52	零售业	湖南省	430000	长沙市	430100
419	2021	0.0585281	5.85281	3	1.60944	0.0423446	0	0	0	0	0.1693	0	-0.040137	1.09861	0	F52	零售业	湖南省	430000	长沙市	430100
419	2022	0.0575867	5.75867	3	1.79176	0.045045	0	0	0	0	0.1786	0	0.00489	0.693147	0	F52	零售业	湖南省	430000	长沙市	430100
419	2023	0.069604	6.9604	3	2.07944	0.0389156	0	0	0	0	0.1423	0	0.042808	1.94591	0	F52	零售业	湖南省	430000	长沙市	430100
420	2011	0.0230145	2.30145	1	0	0.0703167	0	0	0	0	0.4831	0	-0.341535	0	0	C28	化学纤维制造业	吉林省	220000	吉林市	220200
420	2013	0.0449612	4.49612	1	0	0.072754	0	0	0	0	0.3419	0	-0.71474	2.63906	0.693147	C28	化学纤维制造业	吉林省	220000	吉林市	220200
420	2014	0.0437932	4.37932	1	0	0.0416819	0	0	0	0	0.4739	0	4.92797	2.07944	0.693147	C28	化学纤维制造业	吉林省	220000	吉林市	220200
420	2015	0.0408836	4.08836	1	0	0.0445086	0	0	0	0	0.4763	0	-0.049524	1.38629	1.09861	C28	化学纤维制造业	吉林省	220000	吉林市	220200
420	2016	0.0381463	3.81463	1	0	0.0249226	0	0	0	0	0.3334	0	1.76703	1.60944	1.38629	C28	化学纤维制造业	吉林省	220000	吉林市	220200
420	2017	0.0325048	3.25048	1	0	0.0370091	0	0	0	0	0.4487	0	0.032254	0	1.79176	C28	化学纤维制造业	吉林省	220000	吉林市	220200
420	2018	0.024453	2.4453	1	0	0.035835	0	0	0	0.21	0.4132	0	0.050129	0.693147	0	C28	化学纤维制造业	吉林省	220000	吉林市	220200
420	2019	0.034862	3.4862	1	0	0.0288321	0	0	0	0.16	0.5643	0	0.034237	0.693147	0.693147	C28	化学纤维制造业	吉林省	220000	吉林市	220200
420	2020	0.0374942	3.74942	1	0	0.0268006	0	0	0	0.15	0.522	0	0.030779	1.79176	0	C28	化学纤维制造业	吉林省	220000	吉林市	220200
420	2021	0.0575247	5.75247	2	0.693147	0.0252213	0	0	0	0	0.5987	0	-0.049599	1.60944	0	C28	化学纤维制造业	吉林省	220000	吉林市	220200
420	2022	0.0582987	5.82987	2	0.693147	0.0202462	0	0	0	0	0.5524	0	0.464114	1.94591	0	C28	化学纤维制造业	吉林省	220000	吉林市	220200
420	2023	0.0504823	5.04823	2	0	0.0227607	0	0	0	0	0.5758	0	0.007432	1.79176	0	C28	化学纤维制造业	吉林省	220000	吉林市	220200
421	2011	0.0966152	9.66152	1	1.09861	0.0440136	0	0	0	0.16	0.2885	1	0.023139	0	0	O79	居民服务业	江苏省	320000	南京市	320100
421	2012	0.0824361	8.24361	1	0	0.0385636	0	0	0	0.09	0.2423	1	0.061115	0	0	S90	综合	江苏省	320000	南京市	320100
421	2013	0.0822768	8.22768	1	0	0.0361566	0	0	0	0.1149	0.241	1	0.069664	0	0	S90	综合	江苏省	320000	南京市	320100
421	2014	0.0876847	8.76847	1	0.693147	0.0244159	0	0	0	0.1748	0.2016	1	0.124633	0	0	S90	综合	江苏省	320000	南京市	320100
421	2015	0.0999164	9.99164	1	1.09861	0.0184417	0	0	0	0.37	0.4032	1	0.187856	0	0	D45	燃气生产和供应业	江苏省	320000	南京市	320100
421	2016	0.0880499	8.80499	1	0	0.0163956	0	0	0	1.1325	0.3869	1	0.019031	0	0	D45	燃气生产和供应业	江苏省	320000	南京市	320100
421	2017	0.0831581	8.31581	1	0	0.0121349	0	0	0	1.15	0.2682	1	-0.043771	0	0	D45	燃气生产和供应业	江苏省	320000	南京市	320100
421	2018	0.0896795	8.96795	1	0	0.0113436	0.31	0	0	1.26	0.2763	1	0.010853	0.693147	0	D45	燃气生产和供应业	江苏省	320000	南京市	320100
421	2019	0.0950877	9.50877	1	1.09861	0.0088375	0.38	0	0	0.97	0.27	1	0.033893	0	0	D45	燃气生产和供应业	江苏省	320000	南京市	320100
421	2020	0.118467	11.8467	1	2.3979	0.0092422	2.48	0	0	1.41	0.3024	1	0.077779	0.693147	0	D45	燃气生产和供应业	江苏省	320000	南京市	320100
421	2021	0.123262	12.3262	2	1.79176	0.0068549	1.37	0	0	1.34	0.2439	1	0.055937	1.09861	0	D45	燃气生产和供应业	江苏省	320000	南京市	320100
421	2022	0.0450298	4.50298	2	1.38629	0.0058928	1.7	0	0	1.77	0.2323	0	-0.013732	0.693147	0	D45	燃气生产和供应业	江苏省	320000	南京市	320100
421	2023	0.0383234	3.83234	2	0.693147	0.0064874	2.18	0	0	2.18	0.2323	0	-0.045505	0.693147	0	D45	燃气生产和供应业	江苏省	320000	南京市	320100
422	2011	0.126581	12.6581	3	0	0.0204995	0	0	0	1.86	0.4179	1	0.369218	1.60944	0	C26	化学原料及化学制品制造业	湖北省	420000	宜昌市	420500
422	2012	0.149352	14.9352	4	0	0.0214181	0	0	0	2.41	0.422	1	0.113636	1.94591	1.09861	C26	化学原料及化学制品制造业	湖北省	420000	宜昌市	420500
422	2013	0.288611	28.8611	4	0	0.0200127	0	1.38629	42.8571	0.7064	0.5554	1	-0.050574	1.38629	2.07944	C26	化学原料及化学制品制造业	湖北省	420000	宜昌市	420500
422	2014	0.277285	27.7285	4	0	0.0177011	0	0.693147	50	0.73	0.5067	1	0.007289	1.60944	1.09861	C26	化学原料及化学制品制造业	湖北省	420000	宜昌市	420500
422	2015	0.178988	17.8988	1	0	0.0167999	8.09	0.693147	20	0	0.487	1	0.073161	0.693147	1.79176	C26	化学原料及化学制品制造业	湖北省	420000	宜昌市	420500
422	2016	0.35642	35.642	1	0.693147	0.0172201	9.3	0.693147	100	0	0.5198	1	-0.156527	0.693147	0.693147	C26	化学原料及化学制品制造业	湖北省	420000	宜昌市	420500
422	2017	0.134051	13.4051	2	0.693147	0.0197904	7.72	0.693147	14.2857	0	0.6304	0	-0.770361	2.07944	2.07944	C26	化学原料及化学制品制造业	湖北省	420000	宜昌市	420500
422	2021	0.0612133	6.12133	2	0	0.0129271	7.5	0	0	0.21	0.4084	0	1.95379	3.21888	0	C26	化学原料及化学制品制造业	湖北省	420000	宜昌市	420500
422	2022	0.259285	25.9285	2	0	0.0231842	10	1.60944	28.5714	0.44	0.4218	1	0.715729	2.77259	2.70805	C26	化学原料及化学制品制造业	湖北省	420000	宜昌市	420500
422	2023	0.149952	14.9952	2	0	0.0215274	10.94	1.09861	20	0.76	0.3647	0	0.271428	2.56495	2.3979	C26	化学原料及化学制品制造业	湖北省	420000	宜昌市	420500
423	2011	0.138044	13.8044	3	1.38629	0.0346216	3.11	0	0	1.29	0.1115	1	0.233456	0	2.77259	C27	医药制造业	山东省	370000	聊城市	371500
423	2012	0.13496	13.496	3	1.38629	0.0284777	0	0	0	1.33	0.0981	1	0.240597	0	2.77259	C27	医药制造业	山东省	370000	聊城市	371500
423	2013	0.13211	13.211	2	2.70805	0.0307986	0	0	0	1.7649	0.1072	1	0.179318	0	1.79176	C27	医药制造业	山东省	370000	聊城市	371500
423	2014	0.166673	16.6673	3	2.77259	0.0310148	0	0	0	2.2592	0.1778	1	0.185539	0	4.49981	C27	医药制造业	山东省	370000	聊城市	371500
423	2015	0.144575	14.4575	2	1.94591	0.0231183	7.8	0	0	2.66	0.1583	1	0.175094	0	3.55535	C27	医药制造业	山东省	370000	聊城市	371500
423	2016	0.147578	14.7578	2	1.79176	0.0184665	7.65	0	0	4.2815	0.1425	1	0.183977	0	4.09434	C27	医药制造业	山东省	370000	聊城市	371500
423	2017	0.150702	15.0702	1	1.94591	0.0265704	7.89	0	0	5.23	0.1381	1	0.177123	1.38629	4.00733	C27	医药制造业	山东省	370000	聊城市	371500
423	2018	0.151146	15.1146	1	1.94591	0.0303728	7.9	0	0	5.03	0.125	1	0.147647	1.38629	4.14314	C27	医药制造业	山东省	370000	聊城市	371500
423	2019	0.177847	17.7847	2	2.83321	0.0363971	8.72	0	0	4.2	0.185	1	-0.115274	1.60944	4.35671	C27	医药制造业	山东省	370000	聊城市	371500
423	2020	0.171664	17.1664	2	2.89037	0.0403663	8.38	0	0	4.1	0.2032	1	-0.025121	1.38629	3.58352	C27	医药制造业	山东省	370000	聊城市	371500
423	2021	0.160699	16.0699	2	2.77259	0.0351749	7.2	0	0	3.97	0.1774	1	0.022334	1.09861	2.89037	C27	医药制造业	山东省	370000	聊城市	371500
423	2022	0.150299	15.0298	2	2.30259	0.0262881	8.4	0	0	4.37	0.1554	1	0.035558	0.693147	2.63906	C27	医药制造业	山东省	370000	聊城市	371500
423	2023	0.190055	19.0055	6	1.94591	0.0242369	8.78	0	0	5.65	0.1381	1	0.037656	0.693147	2.30259	C27	医药制造业	山东省	370000	聊城市	371500
425	2011	0.119885	11.9885	3	0	0.0381921	0	0	0	0	0.074	1	0.238884	1.38629	1.38629	C35	专用设备制造业	江苏省	320000	徐州市	320300
425	2012	0.164276	16.4276	3	0	0.042267	0	0.693147	1.5625	9.33	0.1293	1	0.156265	0	4.17439	C35	专用设备制造业	江苏省	320000	徐州市	320300
425	2013	0.148987	14.8987	2	0.693147	0.0438277	0	0	0	10.3855	0.1248	1	0.123099	0.693147	4.84419	C35	专用设备制造业	江苏省	320000	徐州市	320300
425	2014	0.200665	20.0665	1	0	0.044788	0	2.19722	3.4632	10.1	0.1677	1	0.026608	0	5.44674	C35	专用设备制造业	江苏省	320000	徐州市	320300
425	2015	0.231689	23.1689	1	0.693147	0.0350671	14.97	2.63906	3.7464	8.37	0.1411	1	0.008082	0	5.8522	C35	专用设备制造业	江苏省	320000	徐州市	320300
425	2016	0.243215	24.3215	2	1.60944	0.0413973	15.94	2.30259	3.26087	8.68	0.1716	1	-0.006977	0	5.62402	C35	专用设备制造业	江苏省	320000	徐州市	320300
425	2017	0.141661	14.1661	2	2.77259	0.0398454	15.87	0.693147	0.478469	8.73	0.1445	0	0.174508	1.38629	5.34711	C35	专用设备制造业	江苏省	320000	徐州市	320300
425	2018	0.189705	18.9705	2	3.49651	0.0359553	16.55	1.94591	1.45631	9.14	0.1172	0	0.261256	1.09861	6.02345	C35	专用设备制造业	江苏省	320000	徐州市	320300
425	2019	0.255029	25.5029	2	3.80666	0.0310123	17.97	1.60944	1.48148	10.47	0.0983	1	0.108953	1.38629	5.60212	C35	专用设备制造业	江苏省	320000	徐州市	320300
425	2020	0.260514	26.0514	3	3.61092	0.0271633	18.55	1.60944	3.57143	11.06	0.0868	1	0.015588	1.09861	4.72739	C35	专用设备制造业	江苏省	320000	徐州市	320300
425	2021	0.247628	24.7628	2	3.46574	0.0283535	18.88	1.38629	10.7143	11.41	0.0782	1	0.087751	1.09861	3.3673	C35	专用设备制造业	江苏省	320000	徐州市	320300
425	2022	0.227101	22.71	2	2.94444	0.0368012	21	1.09861	6.89655	12.99	0.1083	1	0.035409	0.693147	3.4012	C35	专用设备制造业	江苏省	320000	徐州市	320300
425	2023	0.127901	12.7901	2	3.55535	0.0455182	24.2	0	0	12.99	0.139	0	0.051687	1.38629	3.61092	C35	专用设备制造业	江苏省	320000	徐州市	320300
426	2011	0.110468	11.0468	1	0	0.465657	0	0	0	0	0.1902	1	0.420364	0.693147	0	B09	有色金属矿采选业	内蒙古自治区	150000	赤峰市	150400
426	2012	0.127523	12.7523	1	0	0.411414	0	0	0	0	0.4027	1	0.057805	2.07944	0	B09	有色金属矿采选业	内蒙古自治区	150000	赤峰市	150400
426	2013	0.11588	11.588	1	0	0.309359	0	0	0	0	0.3554	1	0.601444	1.60944	0	B09	有色金属矿采选业	内蒙古自治区	150000	赤峰市	150400
426	2014	0.1157	11.57	1	0	0.381703	0	0	0	0	0.3572	1	0.00587	1.09861	0	B09	有色金属矿采选业	内蒙古自治区	150000	赤峰市	150400
426	2015	0.114379	11.4379	1	0	0.378057	0	0	0	0	0.3289	1	-0.03123	1.09861	0	B09	有色金属矿采选业	内蒙古自治区	150000	赤峰市	150400
426	2016	0.0977114	9.77114	1	0	0.372928	0	0	0	0	0.1495	1	0.771163	0	0	B09	有色金属矿采选业	内蒙古自治区	150000	赤峰市	150400
426	2017	0.116157	11.6157	1	0	0.39017	0	0	0	0	0.3565	1	0.104479	1.09861	0	B09	有色金属矿采选业	内蒙古自治区	150000	赤峰市	150400
426	2018	0.127247	12.7247	1	0	0.392651	5.56	0	0	0	0.3204	1	-0.049	2.07944	0	B09	有色金属矿采选业	内蒙古自治区	150000	赤峰市	150400
426	2019	0.123195	12.3195	1	0	0.362969	0	0	0	0	0.3144	1	0.051431	2.30259	0	B09	有色金属矿采选业	内蒙古自治区	150000	赤峰市	150400
426	2020	0.122564	12.2564	1	0	0.346571	0	0	0	0	0.3704	1	-0.040664	2.07944	0	B09	有色金属矿采选业	内蒙古自治区	150000	赤峰市	150400
426	2021	0.122901	12.2901	1	0	0.343461	0	0	0	0	0.3834	1	0.041516	2.07944	0	B09	有色金属矿采选业	内蒙古自治区	150000	赤峰市	150400
426	2022	0.147461	14.7462	1	1.38629	0.311383	13.63	0	0	0	0.4189	1	0.034628	2.07944	0	B09	有色金属矿采选业	内蒙古自治区	150000	赤峰市	150400
426	2023	0.0663878	6.63878	1	0	0.375247	16.26	0	0	0	0.3954	0	0.185291	2.07944	0	B09	有色金属矿采选业	内蒙古自治区	150000	赤峰市	150400
428	2011	0.0909023	9.09023	1	0	0.0362211	0	0	0	0.35	0.4534	1	0.115218	0	0	H61	住宿业	湖南省	430000	长沙市	430100
428	2012	0.094015	9.4015	1	0	0.0612844	0	0	0	0.12	0.5031	1	-0.021407	0	0	H61	住宿业	湖南省	430000	长沙市	430100
428	2013	0.0975431	9.75431	1	0.693147	0.0541364	0	0	0	0.2366	0.4076	1	0.055741	0	0	H61	住宿业	湖南省	430000	长沙市	430100
428	2014	0.102479	10.2478	1	1.09861	0.0548818	0	0	0	0.9	0.4005	1	-0.066033	0	0	H61	住宿业	湖南省	430000	长沙市	430100
428	2015	0.103199	10.3199	1	1.38629	0.0508791	0	0	0	0.34	0.3604	1	0.87471	0	0	H61	住宿业	湖南省	430000	长沙市	430100
428	2016	0.0476092	4.76091	1	2.48491	0.0645382	0	0	0	0.39	0.4167	0	-0.128456	0	0	H61	住宿业	湖南省	430000	长沙市	430100
428	2017	0.0445075	4.45075	1	2.30259	0.0619319	0	0	0	0.65	0.3845	0	-0.018306	0	0	H61	住宿业	湖南省	430000	长沙市	430100
428	2018	0.0444091	4.44091	1	1.94591	0.0755619	0	0	0	0.79	0.4572	0	-0.158387	0	0	H61	住宿业	湖南省	430000	长沙市	430100
428	2019	0.0443607	4.43607	1	1.94591	0.0731401	0	0	0	0.94	0.455	0	0.000837	0	0	H61	住宿业	湖南省	430000	长沙市	430100
428	2020	0.044076	4.4076	1	1.79176	0.076098	0	0	0	0.94	0.4864	0	-0.251307	0	0	H61	住宿业	湖南省	430000	长沙市	430100
428	2021	0.0388376	3.88376	1	0.693147	0.0761839	0	0	0	0.6	0.4296	0	-0.026447	1.09861	0	H61	住宿业	湖南省	430000	长沙市	430100
428	2022	0.0446817	4.46817	1	1.09861	0.0783404	0	0	0	0.53	0.4649	0	-0.226954	1.09861	0	H61	住宿业	湖南省	430000	长沙市	430100
428	2023	0.0417758	4.17758	1	0.693147	0.0761867	0	0	0	0.55	0.4436	0	-0.116911	1.38629	0	H61	住宿业	湖南省	430000	长沙市	430100
429	2011	0.0366797	3.66797	2	0	0.0045047	0	0	0	1.96	0.3443	0	-0.009213	1.09861	0	G58	装卸搬运和运输代理业	广东省	440000	广州市	440100
429	2012	0.0475085	4.75085	2	0	0.0034564	0	0	0	1.83	0.6249	0	0.075005	1.09861	0	G54	道路运输业	广东省	440000	广州市	440100
429	2013	0.0434432	4.34432	2	0	0.0004196	0	0	0	2.0846	0.6063	0	-0.011681	0.693147	0	G54	道路运输业	广东省	440000	广州市	440100
429	2014	0.0454838	4.54838	2	0	0.0004036	0	0	0	1.9768	0.5735	0	0.161946	1.09861	0	G54	道路运输业	广东省	440000	广州市	440100
429	2015	0.0347968	3.47968	2	0	0.0003386	0	0	0	1.81	0.5444	0	0.043841	0	0	G54	道路运输业	广东省	440000	广州市	440100
429	2016	0.128601	12.8601	2	1.09861	0.0003819	1.34	0	0	1.4726	0.5777	1	0.242645	1.09861	0	G54	道路运输业	广东省	440000	广州市	440100
429	2017	0.125885	12.5884	2	1.38629	0.0004295	1.24	0	0	1.6	0.5148	1	0.069044	0.693147	0	G54	道路运输业	广东省	440000	广州市	440100
429	2018	0.114696	11.4695	2	1.09861	0.0003522	0.77	0	0	1.68	0.4664	1	0.062638	0	0	G54	道路运输业	广东省	440000	广州市	440100
429	2019	0.104411	10.4411	2	0	0.0003618	0	0	0	2.32	0.505	1	0.020335	0	0	G54	道路运输业	广东省	440000	广州市	440100
429	2020	0.125406	12.5406	2	1.60944	0.0153116	0.07	0	0	1.83	0.5843	1	-0.194118	0	0	G54	道路运输业	广东省	440000	广州市	440100
429	2021	0.128165	12.8165	1	2.3979	0.0142248	0.4	0	0	1.98	0.5636	1	0.106396	0.693147	0	G54	道路运输业	广东省	440000	广州市	440100
429	2022	0.114576	11.4576	1	1.94591	0.012176	0.81	0	0	1.65	0.4983	1	0.004232	0	0	G54	道路运输业	广东省	440000	广州市	440100
429	2023	0.0485249	4.85249	2	1.60944	0.0103575	0	0	0	2.2	0.4216	0	0.091491	0	0	G54	道路运输业	广东省	440000	广州市	440100
430	2012	0.100173	10.0173	1	0	0.158892	0	0	0	0	0.5218	1	0.367862	0	0	N78	公共设施管理业	湖南省	430000	张家界市	430800
430	2013	0.0938632	9.38632	1	0	0.129635	0	0	0	0	0.4038	1	0.134677	0	0	N78	公共设施管理业	湖南省	430000	张家界市	430800
430	2014	0.115834	11.5834	1	1.09861	0.112897	0	0	0	0	0.6822	1	0.149542	0	0	N78	公共设施管理业	湖南省	430000	张家界市	430800
430	2015	0.038766	3.8766	1	0.693147	0.101804	0	0	0	0	0.6456	0	0.229696	0	0	N78	公共设施管理业	湖南省	430000	张家界市	430800
430	2016	0.0415822	4.15822	1	0	0.518701	0	0	0	0	0.3068	0	0.108385	0	0	N78	公共设施管理业	湖南省	430000	张家界市	430800
430	2017	0.0351553	3.51553	1	0	0.437526	0	0	0	0	0.2598	0	1.29819	0	0	N78	公共设施管理业	湖南省	430000	张家界市	430800
430	2018	0.103181	10.3181	1	0	0.398515	0	0	0	0.61	0.2345	1	0.015948	0	0	N78	公共设施管理业	湖南省	430000	张家界市	430800
430	2019	0.0991273	9.91273	1	0	0.362538	0	0	0	0	0.2011	1	0.010823	0	0	N78	公共设施管理业	湖南省	430000	张家界市	430800
430	2020	0.103247	10.3247	1	0	0.336357	0	0	0	0.37	0.1831	1	-0.056885	0.693147	0	N78	公共设施管理业	湖南省	430000	张家界市	430800
430	2021	0.0296665	2.96665	1	0	0.212383	0	0	0	0.58	0.4299	0	-0.095748	0	0	N78	公共设施管理业	湖南省	430000	张家界市	430800
430	2022	0.0300236	3.00236	1	0	0.204484	0	0	0	0.61	0.4496	0	-0.189366	0	0	N78	公共设施管理业	湖南省	430000	张家界市	430800
430	2023	0.0294222	2.94222	1	0	0.209843	0	0	0	0.63	0.426	0	-0.21666	0	0	N78	公共设施管理业	湖南省	430000	张家界市	430800
488	2011	0.171391	17.1391	4	1.94591	0.0332481	0	0	0	0.13	0.4984	1	-0.017852	0.693147	2.56495	C22	造纸及纸制品业	山东省	370000	寿光市	370783
488	2012	0.135128	13.5128	1	1.09861	0.0296801	0	0	0	0.13	0.4139	1	-0.042859	2.89037	1.38629	C22	造纸及纸制品业	山东省	370000	寿光市	370783
488	2013	0.159008	15.9008	2	1.60944	0.0287324	0	0	0	0.2007	0.4457	1	0.02042	2.89037	2.19722	C22	造纸及纸制品业	山东省	370000	寿光市	370783
488	2014	0.150285	15.0285	2	1.94591	0.0232147	0	0	0	0.21	0.4355	1	-0.01983	2.77259	0.693147	C22	造纸及纸制品业	山东省	370000	寿光市	370783
488	2015	0.143306	14.3306	3	0	0.0187619	9.32	0	0	0.14	0.31	1	0.202875	2.94444	0.693147	C22	造纸及纸制品业	山东省	370000	寿光市	370783
488	2016	0.137858	13.7858	3	0	0.018727	8.94	0	0	0.3003	0.3501	1	0.307431	2.70805	0	C22	造纸及纸制品业	山东省	370000	寿光市	370783
488	2017	0.176387	17.6387	1	0	0.0194956	10.56	0.693147	11.1111	0.33	0.2672	1	0.341652	2.99573	2.30259	C22	造纸及纸制品业	山东省	370000	寿光市	370783
488	2018	0.11443	11.443	1	0	0.0184142	12.26	0	0	0.38	0.265	1	-0.145421	2.70805	0	C22	造纸及纸制品业	山东省	370000	寿光市	370783
488	2019	0.133483	13.3483	1	0	0.0181817	14.07	0	0	0.44	0.3516	1	0.018092	2.89037	1.79176	C22	造纸及纸制品业	山东省	370000	寿光市	370783
488	2020	0.175191	17.5191	3	0.693147	0.0193788	15.16	0	0	0.32	0.4112	1	-0.020483	2.77259	3.13549	C22	造纸及纸制品业	山东省	370000	寿光市	370783
488	2021	0.173654	17.3654	5	0	0.0192256	15.45	0	0	0.2	0.4304	1	-0.126101	2.77259	0.693147	C22	造纸及纸制品业	山东省	370000	寿光市	370783
488	2022	0.160762	16.0762	5	0	0.0217238	12.62	0	0	0.19	0.4009	1	0.051084	2.19722	0	C22	造纸及纸制品业	山东省	370000	寿光市	370783
488	2023	0.173186	17.3186	5	0	0.025191	14.16	0	0	0.22	0.4175	1	-0.110855	2.07944	1.60944	C22	造纸及纸制品业	山东省	370000	寿光市	370783
498	2013	0.0133925	1.33925	2	0	0.0025586	0	0	0	0	0.0493	0	0.139071	0	0	E48	土木工程建筑业	山东省	370000	济南市	370100
498	2014	0.0025384	1.22037	1	0	0.0029569	0	0	0	0.61	0.0417	0	0.151667	0	0	E48	土木工程建筑业	山东省	370000	济南市	370100
498	2015	0.0053051	1.22037	1	0	0.0026775	3.89	0	0	0.64	0.0399	0	0.144607	0	0	E48	土木工程建筑业	山东省	370000	济南市	370100
498	2016	0.0188289	1.88289	1	0.693147	0.0028383	3.31	0	0	1.1819	0.0365	0	0.141723	0.693147	0	E48	土木工程建筑业	山东省	370000	济南市	370100
498	2017	0.0461811	4.61811	3	0	0.0021372	3.11	0	0	1.84	0.0365	0	0.171324	2.07944	0	E48	土木工程建筑业	山东省	370000	济南市	370100
498	2018	0.0450224	4.50224	3	0	0.0023277	3.29	0	0	2.01	0.0271	0	0.564509	1.94591	0	E48	土木工程建筑业	山东省	370000	济南市	370100
498	2019	0.0397336	3.97336	2	0	0.0016727	8.85	0	0	1.85	0.0283	0	0.229143	2.19722	0	E48	土木工程建筑业	山东省	370000	济南市	370100
498	2020	0.130374	13.0373	2	2.19722	0.0033185	8.45	0	0	2.52	0.0421	1	0.250642	1.60944	0	E48	土木工程建筑业	山东省	370000	济南市	370100
498	2021	0.139864	13.9864	2	1.79176	0.0043135	7.89	0	0	2.99	0.0388	1	0.55207	2.07944	1.38629	E48	土木工程建筑业	山东省	370000	济南市	370100
498	2022	0.183302	18.3302	2	1.38629	0.0039314	6.86	0.693147	0.704225	3.04	0.0344	1	0.146858	2.30259	4.96284	E48	土木工程建筑业	山东省	370000	济南市	370100
498	2023	0.0651959	6.51959	2	1.38629	0.0445392	8.19	0	0	3.16	0.0308	0	0.295213	2.07944	1.09861	E48	土木工程建筑业	山东省	370000	济南市	370100
501	2011	0.0995526	9.95526	1	0	0.133222	0	0	0	0	0.3933	1	0.207832	0.693147	0	F52	零售业	湖北省	420000	武汉市	420100
501	2012	0.0980591	9.80591	1	0	0.145149	0	0	0	0	0.3381	1	0.181304	0.693147	0	F52	零售业	湖北省	420000	武汉市	420100
501	2013	0.116995	11.6995	1	2.19722	0.135314	0	0	0	0	0.3748	1	0.184711	0	0	F52	零售业	湖北省	420000	武汉市	420100
501	2014	0.118879	11.8879	1	1.79176	0.183455	0	0	0	0	0.4655	1	0.204055	0	0	F52	零售业	湖北省	420000	武汉市	420100
501	2015	0.110973	11.0973	1	1.38629	0.157515	0	0	0	0	0.4144	1	0.096568	0	0	F52	零售业	湖北省	420000	武汉市	420100
501	2016	0.112629	11.2629	1	1.60944	0.153215	0	0	0	0	0.4006	1	0.466477	0	0	F52	零售业	湖北省	420000	武汉市	420100
501	2017	0.124673	12.4673	1	2.83321	0.146858	0	0	0	0	0.3771	1	0.18569	0	0	F52	零售业	湖北省	420000	武汉市	420100
501	2018	0.0502472	5.02472	1	1.94591	0.308727	0	0	0	0	0.2913	0	0.149243	0	0	F52	零售业	湖北省	420000	武汉市	420100
501	2019	0.0485772	4.85772	1	1.94591	0.291314	0	0	0	0	0.274	0	0.152839	0	0	F52	零售业	湖北省	420000	武汉市	420100
501	2020	0.0501799	5.01799	1	2.07944	0.293064	0	0	0	0	0.2753	0	0.042623	0	0	F52	零售业	湖北省	420000	武汉市	420100
501	2021	0.134451	13.4451	3	1.60944	0.267184	0	0	0	0	0.2177	1	0.076895	0	0	F52	零售业	湖北省	420000	武汉市	420100
501	2022	0.150431	15.0432	3	1.09861	0.24481	0	0	0	0	0.4497	1	0.012637	0.693147	1.09861	F52	零售业	湖北省	420000	武汉市	420100
501	2023	0.0744438	7.44438	3	1.79176	0.230799	0	0	0	0	0.4887	0	0.017805	0	0	F52	零售业	湖北省	420000	武汉市	420100
503	2011	0.129856	12.9856	1	5.03695	0.0362154	0	0	0	0	0.0582	1	-0.026594	0	0	S90	综合	海南省	460000	海口市	460100
503	2012	0.119749	11.9749	1	4.07754	0.0426852	0	0	0	0	0.0577	1	0.022276	0	0	I63	电信、广播电视和卫星传输服务	海南省	460000	海口市	460100
503	2013	0.121833	12.1833	1	4.2485	0.0427208	0	0	0	0	0.0633	1	-0.012867	0	0	I64	互联网和相关服务	海南省	460000	海口市	460100
503	2014	0.112434	11.2434	1	3.33221	0.0456943	0	0	0	0	0.0739	1	0.043916	0	0	I64	互联网和相关服务	海南省	460000	海口市	460100
503	2015	0.158418	15.8418	1	4.11087	0.0919562	49.53	0	0	0	0.0477	1	0.038966	0	0	I64	互联网和相关服务	海南省	460000	海口市	460100
503	2016	0.171839	17.1839	1	4.7362	0.135979	56.07	0	0	0	0.0315	1	0.024075	0	0	I64	互联网和相关服务	海南省	460000	海口市	460100
503	2017	0.189552	18.9552	3	4.40672	0.117618	56.04	0	0	0	0.027	1	-0.014339	0	0	I64	互联网和相关服务	海南省	460000	海口市	460100
503	2018	0.197923	19.7922	2	4.30406	0.139314	67.62	0	0	9.81	0.0258	1	-0.125849	0	0	I64	互联网和相关服务	海南省	460000	海口市	460100
503	2019	0.201869	20.1869	2	4.67283	0.131265	67.33	0	0	10.89	0.0095	1	0.008104	0	0	I64	互联网和相关服务	海南省	460000	海口市	460100
503	2020	0.187393	18.7393	2	4.02535	0.105899	61.33	0	0	9.49	0.009	1	-0.398336	0	0	I64	互联网和相关服务	海南省	460000	海口市	460100
503	2021	0.16627	16.627	1	4.00733	0.107314	47	0	0	10.05	0.0092	1	-0.183559	0	0	I64	互联网和相关服务	海南省	460000	海口市	460100
503	2022	0.167267	16.7267	1	4.14314	0.108985	46.76	0	0	9.69	0.0093	1	-0.094303	0	0	I64	互联网和相关服务	山东省	370000	青岛市	370200
503	2023	0.116084	11.6083	3	4.15888	0.0597087	46.23	0	0	9.69	0.005	0	0.992901	0	0	I64	互联网和相关服务	山东省	370000	青岛市	370200
504	2017	0.136404	13.6404	2	0	0.0190418	12.59	0	0	12.59	0.0255	1	0.610289	3.4012	0	R85	新闻和出版业	湖南省	430000	长沙市	430100
504	2018	0.141165	14.1165	2	0.693147	0.0515714	17.53	0	0	6.03	0.0555	1	-0.161027	3.17805	0	M75	科技推广和应用服务业	湖南省	430000	长沙市	430100
504	2021	0.141428	14.1427	2	1.94591	0.0003304	5.75	0	0	5.38	0.025	1	-0.179669	3.17805	0	M75	科技推广和应用服务业	湖南省	430000	长沙市	430100
504	2022	0.148019	14.8019	2	1.60944	0.0006532	5.66	0	0	7.82	0.0368	1	-0.275882	3.09104	1.09861	M75	科技推广和应用服务业	湖南省	430000	长沙市	430100
504	2023	0.0711021	7.11022	2	1.38629	0.0005715	5.81	0	0	7.82	0.0185	0	2.79959	3.61092	0	M75	科技推广和应用服务业	湖南省	430000	长沙市	430100
505	2014	0.0115048	1.22037	1	0	0.0186338	0	0	0	0	0.2655	0	-0.851095	0	0	K70	房地产业	海南省	460000	海口市	460100
505	2017	0.122334	12.2334	1	2.70805	0.0655736	0.71	0	0	0	0.2192	1	0.016739	1.09861	0	K70	房地产业	海南省	460000	海口市	460100
505	2018	0.127201	12.7201	1	2.89037	0.0779685	1.57	0	0	0	0.2586	1	0.091771	1.09861	0	C13	农副食品加工业	海南省	460000	海口市	460100
505	2019	0.124793	12.4793	1	2.83321	0.0703788	1.18	0	0	0	0.2314	1	0.053549	1.09861	0	C13	农副食品加工业	海南省	460000	海口市	460100
505	2020	0.120555	12.0555	1	2.56495	0.0621787	1.79	0	0	0	0.1986	1	0.036133	1.09861	0	C13	农副食品加工业	海南省	460000	海口市	460100
505	2021	0.115464	11.5464	1	1.94591	0.0562251	1.88	0	0	0	0.1854	1	0.068722	1.38629	0	C13	农副食品加工业	海南省	460000	海口市	460100
505	2022	0.0400569	4.00569	1	1.79176	0.0532411	1.9	0	0	0	0.1716	0	0.045456	1.09861	0	C13	农副食品加工业	海南省	460000	海口市	460100
505	2023	0.0673649	6.73649	3	2.19722	0.0635202	3.03	0	0	0	0.1446	0	0.032524	1.09861	0	C13	农副食品加工业	海南省	460000	海口市	460100
506	2011	0.0754341	7.54341	1	0	0.0323908	0	0	0	1.92	0.0199	1	0.30858	0	0	K70	房地产业	山东省	370000	济南市	370100
506	2012	0.0766996	7.66996	1	0	0.0429361	0	0	0	2.73	0.0134	1	0.240193	0	0	K70	房地产业	山东省	370000	济南市	370100
506	2013	0.0943465	9.43465	1	0	0.11216	0	0	0	4.0609	0.0859	1	0.172775	1.09861	0	K70	房地产业	山东省	370000	济南市	370100
506	2014	0.0936276	9.36276	1	0	0.107408	0	0	0	1.01	0.101	1	-0.173332	1.38629	0	K70	房地产业	山东省	370000	济南市	370100
506	2015	0.0939208	9.39208	1	0	0.100215	0	0	0	1.19	0.1135	1	0.002793	1.38629	0	B09	有色金属矿采选业	山东省	370000	济南市	370100
506	2016	0.0949871	9.49871	1	0	0.109479	0	0	0	0.78	0.1391	1	0.023274	1.38629	0	B09	有色金属矿采选业	山东省	370000	济南市	370100
506	2017	0.100928	10.0928	1	0	0.0982132	0	0	0	0.67	0.2222	1	-0.316263	1.79176	0	B09	有色金属矿采选业	山东省	370000	济南市	370100
506	2018	0.0434325	4.34325	1	1.38629	0.0887691	0	0	0	0.6653	0.2237	0	0.033452	1.60944	0	B09	有色金属矿采选业	山东省	370000	济南市	370100
506	2019	0.032383	3.2383	1	0.693147	0.079796	0	0	0	0.4	0.2038	0	-0.018502	1.38629	0	B09	有色金属矿采选业	山东省	370000	济南市	370100
506	2020	0.118512	11.8512	1	2.19722	0.0642487	0	0	0	0.48	0.2028	1	-0.475622	1.38629	0	B09	有色金属矿采选业	山东省	370000	济南市	370100
506	2021	0.102884	10.2884	1	0.693147	0.0405184	0	0	0	0.54	0.2547	1	-0.30002	1.38629	0	B09	有色金属矿采选业	山东省	370000	济南市	370100
506	2022	0.107225	10.7225	1	1.09861	0.0360657	0	0	0	1	0.3073	1	0.673931	1.09861	0	B09	有色金属矿采选业	山东省	370000	济南市	370100
506	2023	0.0669234	6.69234	1	1.09861	0.577764	0	0	0	1	0.2318	0	1.00074	1.38629	0	B09	有色金属矿采选业	山东省	370000	济南市	370100
507	2011	0.0327436	3.27436	1	1.09861	0.0552634	0	0	0	2.03	0.2386	0	0.139054	0.693147	0	S90	综合	广东省	440000	珠海市	440400
507	2012	0.0236727	2.36727	1	0	0.0512703	0	0	0	3.92	0.2634	0	0.113743	0.693147	0	G55	水上运输业	广东省	440000	珠海市	440400
507	2013	0.0358348	3.58348	1	0.693147	0.0570838	0	0	0	3.7752	0.2263	0	0.274392	1.38629	0	G55	水上运输业	广东省	440000	珠海市	440400
507	2014	0.031717	3.1717	1	0	0.045438	0	0	0	3.81	0.3297	0	0.042444	1.38629	0	G55	水上运输业	广东省	440000	珠海市	440400
507	2015	0.0308665	3.08665	1	0	0.0482686	0	0	0	2.81	0.3952	0	0.058251	1.09861	0	G55	水上运输业	广东省	440000	珠海市	440400
507	2016	0.0394017	3.94017	1	0.693147	0.0374694	0	0	0	2.5603	0.443	0	0.042661	1.09861	0	G55	水上运输业	广东省	440000	珠海市	440400
507	2017	0.0429712	4.29712	1	1.38629	0.0380054	0	0	0	2.57	0.4283	0	0.059134	0.693147	0	G55	水上运输业	广东省	440000	珠海市	440400
507	2018	0.0517841	5.17841	1	2.30259	0.0317223	1.62	0	0	2.38	0.3832	0	0.038993	0.693147	0	G55	水上运输业	广东省	440000	珠海市	440400
507	2019	0.0459439	4.59439	1	1.94591	0.0229681	2.27	0	0	2.89	0.3189	0	0.733199	0.693147	0	G55	水上运输业	广东省	440000	珠海市	440400
507	2020	0.0366551	3.66551	1	0	0.0679122	2.43	0	0	2.57	0.3657	0	0.03743	1.60944	0	G55	水上运输业	广东省	440000	珠海市	440400
507	2021	0.152214	15.2214	4	0.693147	0.0709546	7.35	0	0	1.72	0.3139	1	0.260591	1.94591	0	G55	水上运输业	广东省	440000	珠海市	440400
507	2022	0.0736743	7.36743	4	0.693147	0.0621391	5.11	0	0	1.97	0.3417	0	0.106356	1.09861	0	G55	水上运输业	广东省	440000	珠海市	440400
507	2023	0.0816188	8.16188	5	0.693147	0.0606104	4.47	0	0	1.97	0.3588	0	0.039162	0.693147	0	G55	水上运输业	广东省	440000	珠海市	440400
509	2014	0.0785931	7.85931	1	0	0	0	0	0	0	0.2036	1	-0.834815	0	0	C29	橡胶和塑料制品业	四川省	510000	南充市	511300
509	2015	0.0864148	8.64148	1	0.693147	0.0001258	0	0	0	0	0.2083	1	1.69344	0	0	C29	橡胶和塑料制品业	四川省	510000	南充市	511300
509	2016	0.0849078	8.49078	1	1.09861	0	0	0	0	0	0.0593	1	-0.321299	0	0	C29	橡胶和塑料制品业	四川省	510000	南充市	511300
509	2017	0.0797348	7.97348	1	0.693147	0	0	0	0	0	0.0395	1	0.513313	0	0	C29	橡胶和塑料制品业	四川省	510000	南充市	511300
509	2018	0.078489	7.8489	1	0	0	0	0	0	0	0.0508	1	-0.555504	0.693147	0	C29	橡胶和塑料制品业	四川省	510000	南充市	511300
509	2022	0.040334	4.0334	1	1.09861	0.062963	12.79	0	0	3.47	0.1431	0	0.00953	0.693147	0	Q83	卫生	四川省	510000	南充市	511300
509	2023	0.0490885	4.90885	2	1.09861	0.0470665	11.51	0	0	2.88	0.1427	0	0.029322	0.693147	0	Q83	卫生	四川省	510000	南充市	511300
510	2011	0.0487261	4.87261	1	0	0.0432803	0	0	0	0	0.5898	0	-0.04997	1.79176	1.09861	C26	化学原料及化学制品制造业	四川省	510000	德阳市	510600
510	2012	0.0474382	4.74382	2	0	0.0335882	0	0	0	0	0.5952	0	0.01029	0.693147	0.693147	C26	化学原料及化学制品制造业	四川省	510000	德阳市	510600
510	2013	0.0290651	2.90651	1	0	0.0395546	0	0	0	0	0.6813	0	-0.166426	0	0	C26	化学原料及化学制品制造业	四川省	510000	德阳市	510600
510	2014	0.0268982	2.68982	1	0	0.0392699	0	0	0	0	0.6266	0	-0.155773	0	0	C26	化学原料及化学制品制造业	四川省	510000	德阳市	510600
510	2016	0.0372095	3.72095	1	0	0.0472978	2	0	0	0	0.715	0	0.064756	0	0.693147	C26	化学原料及化学制品制造业	四川省	510000	德阳市	510600
510	2017	0.0334915	3.34915	1	0	0.0406101	2.2	0	0	0	0.6017	0	0.034107	0.693147	0	C26	化学原料及化学制品制造业	四川省	510000	德阳市	510600
510	2018	0.0442432	4.42432	2	0	0.0431069	2.6	0	0	0	0.5774	0	0.090493	0.693147	0	C26	化学原料及化学制品制造业	四川省	510000	德阳市	510600
510	2019	0.0242323	2.42323	1	0	0.0380341	2.7	0	0	0.36	0.5002	0	0.098996	0	0	C26	化学原料及化学制品制造业	四川省	510000	德阳市	510600
510	2020	0.0305399	3.05399	1	0	0.0321481	2.8	0	0	0.49	0.5136	0	0.042633	0.693147	0	C26	化学原料及化学制品制造业	四川省	510000	德阳市	510600
510	2021	0.0545178	5.45178	2	0.693147	0.0255588	2.8	0	0	0.58	0.4531	0	0.244175	1.60944	0	C26	化学原料及化学制品制造业	四川省	510000	德阳市	510600
510	2022	0.120432	12.0432	2	0	0.0267786	2.9	0	0	0.71	0.4465	1	0.071359	1.94591	0	C26	化学原料及化学制品制造业	四川省	510000	德阳市	510600
510	2023	0.0400243	4.00243	1	0	0.0696711	3.2	0	0	0.71	0.4159	0	-0.090734	1.94591	0	C26	化学原料及化学制品制造业	四川省	510000	德阳市	510600
513	2011	0.0314497	3.14497	1	0	0.0370169	0	0	0	2.6	0.2369	0	0.141131	0	2.3979	C27	医药制造业	广东省	440000	珠海市	440400
513	2012	0.0400665	4.00666	1	0	0.0364108	0	0	0	3.22	0.2001	0	0.05595	0.693147	2.89037	C27	医药制造业	广东省	440000	珠海市	440400
513	2013	0.126379	12.6379	2	0	0.0341938	0	0	0	4.4879	0.3011	1	0.133454	0.693147	2.77259	C27	医药制造业	广东省	440000	珠海市	440400
513	2014	0.136866	13.6866	2	1.09861	0.0353676	0	0	0	4.4012	0.4031	1	0.132584	0	2.83321	C27	医药制造业	广东省	440000	珠海市	440400
513	2015	0.144102	14.4102	1	2.07944	0.0321229	6.31	0	0	4.45	0.4115	1	0.178197	1.09861	1.94591	C27	医药制造业	广东省	440000	珠海市	440400
513	2016	0.154071	15.4071	2	1.60944	0.0283879	5.65	0	0	4.35	0.3173	1	0.477295	1.38629	2.77259	C27	医药制造业	广东省	440000	珠海市	440400
513	2017	0.14593	14.593	1	1.60944	0.0165938	8.42	0	0	5.1845	0.2089	1	0.580945	2.56495	2.07944	C27	医药制造业	广东省	440000	珠海市	440400
513	2018	0.163415	16.3415	2	1.60944	0.014004	9.4	0	0	6.01	0.1845	1	0.045956	2.70805	2.70805	C27	医药制造业	广东省	440000	珠海市	440400
513	2019	0.142883	14.2883	1	1.60944	0.01277	8.08	0	0	5	0.1758	1	0.044712	2.83321	1.60944	C27	医药制造业	广东省	440000	珠海市	440400
513	2020	0.168848	16.8848	3	1.94591	0.0114823	10.89	0	0	5.94	0.1604	1	0.111187	2.94444	1.09861	C27	医药制造业	广东省	440000	珠海市	440400
513	2021	0.189966	18.9966	4	1.94591	0.0116342	10.91	0	0	5.7	0.164	1	0.049189	3.29584	2.07944	C27	医药制造业	广东省	440000	珠海市	440400
513	2022	0.19628	19.628	5	2.07944	0.0224187	10.81	0	0	5.59	0.1596	1	0.043688	3.33221	1.09861	C27	医药制造业	广东省	440000	珠海市	440400
513	2023	0.122862	12.2862	4	2.07944	0.0170208	10.14	0	0	6.17	0.1715	0	-0.011354	3.3673	2.19722	C27	医药制造业	广东省	440000	珠海市	440400
514	2011	0.0140645	1.40645	1	0	0.0974421	0	0	0	1.59	0.1698	0	0.163447	0	0	K70	房地产业	重庆市	500000	重庆市	500000
514	2012	0.0128736	1.28736	1	0	0.0720608	0	0	0	1.41	0.1815	0	0.062824	0	0	K70	房地产业	重庆市	500000	重庆市	500000
514	2013	0.0124432	1.24432	1	0	0.0596657	0	0	0	0.727	0.2083	0	0.035099	0	0	K70	房地产业	重庆市	500000	重庆市	500000
514	2014	0.0123658	1.23658	1	0	0.0547097	0	0	0	1.1637	0.2008	0	0.076931	0	0	K70	房地产业	重庆市	500000	重庆市	500000
514	2015	0.0131798	1.31798	1	0	0.0537462	0	0	0	1.59	0.2106	0	-0.016212	0	0	K70	房地产业	重庆市	500000	重庆市	500000
514	2016	0.0099285	1.22037	1	0	0.0553054	0	0	0	1.9777	0.1144	0	0.010338	0	0	K70	房地产业	重庆市	500000	重庆市	500000
514	2017	0.0104283	1.22037	1	0	0.051859	0	0	0	2.57	0.1149	0	0.027911	0	0	K70	房地产业	重庆市	500000	重庆市	500000
514	2018	0.0168109	1.68109	1	0.693147	0.0452978	0	0	0	2.17	0.1062	0	0.002174	0	0	K70	房地产业	重庆市	500000	重庆市	500000
514	2019	0.0095749	1.22037	1	0	0.0413652	0	0	0	2.74	0.1034	0	0.078158	0	0	K70	房地产业	重庆市	500000	重庆市	500000
514	2020	0.0863348	8.63348	1	0.693147	0.0314657	0	0	0	2.68	0.0845	1	0.026847	0	0	K70	房地产业	重庆市	500000	重庆市	500000
514	2021	0.100919	10.0919	3	0	0.0251114	0	0	0	3.01	0.0737	1	0.047455	0	0	K70	房地产业	重庆市	500000	重庆市	500000
514	2022	0.112332	11.2332	4	0	0.0245443	0	0	0	2.94	0.0801	1	0.034892	0	0	K70	房地产业	重庆市	500000	重庆市	500000
514	2023	0.0373057	3.73057	3	0.693147	0.0188251	0	0	0	2.94	0.0699	0	0.042441	0	0	K70	房地产业	重庆市	500000	重庆市	500000
516	2011	0.126191	12.6191	1	2.77259	0.0677843	0	0	0	0	0.5469	1	0.046347	0	0	F52	零售业	陕西省	610000	西安市	610100
516	2012	0.111295	11.1295	1	1.79176	0.0565995	0	0	0	0	0.4561	1	0.067238	0	0	F52	零售业	陕西省	610000	西安市	610100
516	2013	0.109764	10.9764	1	1.60944	0.0779751	0	0	0	0	0.4368	1	0.074875	0	0	F52	零售业	陕西省	610000	西安市	610100
516	2014	0.11585	11.5851	1	2.19722	0.0775856	0	0	0	0	0.4291	1	0.24528	0	0	F52	零售业	陕西省	610000	西安市	610100
516	2015	0.121262	12.1262	1	3.13549	0.0937289	0	0	0	0	0.2827	1	1.08366	0	0	F52	零售业	陕西省	610000	西安市	610100
516	2016	0.108867	10.8867	1	2.07944	0.0887192	0	0	0	0	0.2682	1	0.0512	0	0	F52	零售业	陕西省	610000	西安市	610100
516	2017	0.130925	13.0925	2	2.30259	0.0888322	0	0	0	0	0.2428	1	0.037684	1.09861	0	F52	零售业	陕西省	610000	西安市	610100
516	2018	0.116182	11.6182	1	2.63906	0.0715598	0	0	0	0	0.0859	1	0.55399	1.09861	0	Q83	卫生	陕西省	610000	西安市	610100
516	2019	0.129686	12.9686	1	2.3979	0.0592752	0	0	0	0	0.4522	1	-0.13505	1.38629	0	Q83	卫生	陕西省	610000	西安市	610100
516	2020	0.133797	13.3797	1	2.56495	0.0568785	0	0	0	0	0.5138	1	0.007439	1.38629	0	Q83	卫生	陕西省	610000	西安市	610100
516	2021	0.127025	12.7025	1	2.30259	0.0518347	0	0	0	0	0.5715	1	0.059247	0.693147	0	Q83	卫生	陕西省	610000	西安市	610100
516	2022	0.128772	12.8772	1	2.94444	0.0584868	0	0	0	0	0.4286	1	-0.202696	0.693147	0	Q83	卫生	陕西省	610000	西安市	610100
516	2023	0.073841	7.3841	2	2.89037	0.0659857	0	0	0	0	0.6939	0	-0.102268	0	0	Q83	卫生	陕西省	610000	西安市	610100
517	2011	0.0731113	7.31114	1	0	0.0001081	0	0	0	2.15	0.0009	1	0.212398	0	0	K70	房地产业	浙江省	330000	宁波市	330200
517	2012	0.0783053	7.83053	1	0	0.0001238	0	0	0	1.53	0.001	1	0.212619	0.693147	0	K70	房地产业	浙江省	330000	宁波市	330200
517	2013	0.0889844	8.89844	2	0	0.0001941	0	0	0	1.0029	0.0011	1	0.161834	0.693147	0	K70	房地产业	浙江省	330000	宁波市	330200
517	2014	0.0960711	9.60711	2	0.693147	0.0001941	0	0	0	0.59	0.0012	1	0.130309	0.693147	0	K70	房地产业	浙江省	330000	宁波市	330200
517	2015	0.0825461	8.25461	2	0	0.0001137	0	0	0	0.55	0.0007	1	-0.015202	0	0	K70	房地产业	浙江省	330000	宁波市	330200
517	2016	0.0714907	7.14907	1	0	6.6e-05	0	0	0	0.75	0.0005	1	0.014743	0	0	K70	房地产业	浙江省	330000	宁波市	330200
517	2017	0.0718963	7.18963	1	0	0.0001074	0	0	0	1.1	0.0005	1	0.152616	0	0	K70	房地产业	浙江省	330000	宁波市	330200
517	2018	0.0729515	7.29515	1	0	9.51e-05	0	0	0	2.03	0.0004	1	0.125265	0	0	K70	房地产业	浙江省	330000	宁波市	330200
517	2019	0.0727317	7.27317	1	0	0.0001516	0	0	0	1.82	0.0006	1	0.41528	0	0	K70	房地产业	浙江省	330000	宁波市	330200
517	2020	0.0779021	7.79021	1	0	0.0001134	3.89	0	0	3.89	0.0003	1	0.560538	0	0	K70	房地产业	浙江省	330000	宁波市	330200
517	2021	0.100921	10.0921	3	0	0.0001146	4.94	0	0	3.64	0.0003	1	0.405371	0	0	K70	房地产业	浙江省	330000	宁波市	330200
517	2022	0.102184	10.2184	3	0	0.0001281	7.16	0	0	3.35	0.0004	1	-0.271149	0	0	K70	房地产业	浙江省	330000	宁波市	330200
517	2023	0.0492217	4.92217	4	0	0.0001547	15.9	0	0	3.35	0.0005	0	-0.104602	0	0	K70	房地产业	浙江省	330000	宁波市	330200
518	2011	0.0348489	3.48489	1	0	0.177704	0	0	0	0	0.2317	0	0.040966	0	2.19722	C27	医药制造业	江苏省	320000	江阴市	320281
518	2012	0.0558955	5.58955	1	0	0.177109	0	0	0	0	0.2449	0	-0.093386	0.693147	4.26268	C27	医药制造业	江苏省	320000	江阴市	320281
518	2013	0.0502174	5.02174	1	0.693147	0.119142	0	0	0	0	0	0	-0.119802	0.693147	4.21951	C27	医药制造业	江苏省	320000	江阴市	320281
518	2014	0.0261013	2.61013	1	0.693147	0.124663	0	0	0	0	0	0	-0.01257	0	1.60944	C27	医药制造业	江苏省	320000	江阴市	320281
518	2015	0.0040516	1.22037	1	0	0.0708225	0	0	0	0	0	0	-0.156464	0	0	C27	医药制造业	江苏省	320000	江阴市	320281
518	2016	0.003905	1.22037	1	0	0.0681611	0	0	0	0	0	0	0.003954	0	0	C27	医药制造业	江苏省	320000	江阴市	320281
518	2017	0.0087145	1.22037	1	0	0.0489898	0	0	0	0	0	0	0.105466	0.693147	0	C27	医药制造业	江苏省	320000	江阴市	320281
518	2018	0.0102557	1.22037	1	0	0.043161	2.59	0	0	0	0	0	-0.048469	0.693147	0	C27	医药制造业	江苏省	320000	江阴市	320281
518	2019	0.0100058	1.22037	1	0	0.0379599	2.65	0	0	0	0	0	0.027244	0.693147	0	C27	医药制造业	江苏省	320000	江阴市	320281
518	2020	0.0263895	2.63895	1	0.693147	0.0352418	5.56	0	0	0	0.0871	0	0.037458	1.09861	0	C27	医药制造业	江苏省	320000	江阴市	320281
518	2021	0.0218578	2.18578	1	0	0.0291624	11.02	0	0	0	0.0722	0	-0.055867	1.09861	0	C27	医药制造业	江苏省	320000	江阴市	320281
518	2022	0.0290165	2.90165	1	0.693147	0.0420901	14.35	0	0	0	0.0698	0	-0.082379	0.693147	0	C27	医药制造业	江苏省	320000	江阴市	320281
518	2023	0.0346726	3.46726	1	1.09861	0.0453989	15.49	0	0	0	0.0755	0	-0.135999	0.693147	0	C27	医药制造业	江苏省	320000	江阴市	320281
519	2011	0.0231258	2.31258	1	0	0.0360882	0	0	0	0	0.2848	0	-0.031129	0	1.38629	C34	通用设备制造业	湖南省	430000	湘潭市	430300
519	2012	0.0187865	1.87865	1	0	0.0357104	0	0	0	0	0.2754	0	0.009957	0.693147	0	C34	通用设备制造业	湖南省	430000	湘潭市	430300
519	2013	0.0992411	9.92411	1	0	0.0255409	0	0	0	0	0.3029	1	0.844482	1.79176	0	C30	非金属矿物制品业	湖南省	430000	湘潭市	430300
519	2014	0.10876	10.876	2	0	0.0356785	0	0	0	0	0.3319	1	0.105319	1.38629	0	C30	非金属矿物制品业	湖南省	430000	湘潭市	430300
519	2015	0.115723	11.5723	1	0	0.0348043	12.8	0	0	0.46	0.3493	1	0.044835	1.38629	1.09861	C30	非金属矿物制品业	湖南省	430000	湘潭市	430300
519	2016	0.113666	11.3666	1	0.693147	0.0572165	13.05	0	0	1.1	0.2475	1	0.342564	1.38629	0	C30	非金属矿物制品业	湖南省	430000	湘潭市	430300
519	2017	0.108576	10.8575	1	0	0.0582949	13.88	0	0	0.93	0.2502	1	0.022169	1.60944	0	C35	专用设备制造业	湖南省	430000	湘潭市	430300
519	2018	0.0465584	4.65584	1	0	0.0528843	18.7	0	0	1.04	0.2132	0	0.044433	2.3979	0	C35	专用设备制造业	湖南省	430000	湘潭市	430300
519	2019	0.031184	3.1184	1	0	0.0480146	18.21	0	0	1.27	0.2004	0	0.041496	0.693147	0	C35	专用设备制造业	湖南省	430000	湘潭市	430300
519	2020	0.0430509	4.30509	2	0	0.042184	18.82	0	0	1.5	0.206	0	0.040231	0.693147	0	C35	专用设备制造业	湖南省	430000	湘潭市	430300
519	2021	0.0596107	5.96107	2	0	0.0351206	19.6	0	0	2.76	0.1988	0	0.05793	2.48491	0	C35	专用设备制造业	湖南省	430000	湘潭市	430300
519	2022	0.046456	4.6456	2	0	0.0313711	21.8	0	0	3.34	0.1999	0	0.082212	0.693147	0	C35	专用设备制造业	湖南省	430000	湘潭市	430300
519	2023	0.0504768	5.04768	2	0	0.028906	25.17	0	0	4.34	0.2146	0	0.079664	0.693147	0	C35	专用设备制造业	湖南省	430000	湘潭市	430300
520	2011	0.0232643	2.32643	1	0	9.69e-05	0	0	0	0	0.5913	0	-0.796459	0	0	G55	水上运输业	湖北省	420000	武汉市	420100
520	2015	0.0089086	1.22037	1	0	0	0	0	0	0	0.225	0	1.01814	0	0	G55	水上运输业	湖北省	420000	武汉市	420100
520	2016	0.0068661	1.22037	1	0	0	0	0	0	0	0.1738	0	0.037768	0	0	G55	水上运输业	湖北省	420000	武汉市	420100
520	2017	0.0105255	1.22037	1	0	0	0	0	0	0	0.1168	0	0.193019	0.693147	0	G55	水上运输业	湖北省	420000	武汉市	420100
520	2018	0.0208187	2.08188	1	0	0	0	0	0	0	0.5285	0	0.191594	0	0	G55	水上运输业	湖北省	420000	武汉市	420100
520	2019	0.0225917	2.25917	1	0	0.0049611	0	0	0	0	0.5665	0	0.082146	0	0	G55	水上运输业	湖北省	420000	武汉市	420100
520	2020	0.0438904	4.38904	1	1.09861	0	0	0	0	0	0.6609	0	0.029216	0.693147	0	G55	水上运输业	湖北省	420000	武汉市	420100
520	2021	0.0499798	4.99798	1	0.693147	0	0	0	0	0	0.6281	0	0.231454	2.07944	0	G55	水上运输业	湖北省	420000	武汉市	420100
520	2022	0.0339433	3.39433	1	0	0	0	0	0	0	0.6247	0	0.068291	1.09861	0	G55	水上运输业	湖北省	420000	武汉市	420100
520	2023	0.0302557	3.02557	1	0	0	0	0	0	0	0.6187	0	-0.01705	0.693147	0	G55	水上运输业	湖北省	420000	武汉市	420100
521	2011	0.126441	12.6441	2	0.693147	0.0853212	0	0	0	1.63	0.1231	1	0.039344	0	3.58352	C38	电气机械及器材制造业	安徽省	340000	合肥市	340100
521	2012	0.165675	16.5675	4	1.09861	0.0796676	0	0	0	0.53	0.1577	1	0.044577	0.693147	4.51086	C38	电气机械及器材制造业	安徽省	340000	合肥市	340100
521	2013	0.182092	18.2092	4	2.56495	0.0695896	0	0	0	0.6261	0.1336	1	0.075889	0.693147	4.77069	C38	电气机械及器材制造业	安徽省	340000	合肥市	340100
521	2014	0.168589	16.8589	4	1.94591	0.0623669	0	0	0	0.65	0.1358	1	0.071905	0	4.69135	C38	电气机械及器材制造业	安徽省	340000	合肥市	340100
521	2015	0.179133	17.9133	3	3.29584	0.063757	10.68	0	0	0.6	0.1347	1	-0.0054	0	4.60517	C38	电气机械及器材制造业	安徽省	340000	合肥市	340100
521	2016	0.202655	20.2655	3	3.33221	0.0490878	10.85	0.693147	0.568182	0.7065	0.0963	1	0.471119	0	5.17615	C38	电气机械及器材制造业	安徽省	340000	合肥市	340100
521	2017	0.21838	21.838	3	3.2581	0.0484198	14.29	0.693147	0.520833	0.82	0.0902	1	-0.001724	1.60944	5.26269	C38	电气机械及器材制造业	安徽省	340000	合肥市	340100
521	2018	0.186289	18.6289	2	3.17805	0.0525376	15.52	0	0	0.9	0.1114	1	-0.004193	1.60944	5.1299	C38	电气机械及器材制造业	安徽省	340000	合肥市	340100
521	2019	0.226533	22.6533	2	3.09104	0.0657114	16.62	1.09861	0.598802	1.13	0.1535	1	-0.004591	1.60944	5.81413	C38	电气机械及器材制造业	安徽省	340000	合肥市	340100
521	2020	0.209286	20.9286	2	2.70805	0.0581774	19.62	0.693147	0.31746	1.09	0.1485	1	-0.029319	1.38629	5.75574	C38	电气机械及器材制造业	安徽省	340000	合肥市	340100
521	2021	0.241988	24.1988	3	3.13549	0.0627632	13.04	1.38629	1.03806	1.33	0.1516	1	0.006589	1.38629	5.66988	C38	电气机械及器材制造业	安徽省	340000	合肥市	340100
521	2022	0.23853	23.853	3	2.94444	0.0555894	15.07	1.09861	0.558659	1.34	0.1376	1	0.108962	2.07944	5.88332	C38	电气机械及器材制造业	安徽省	340000	合肥市	340100
521	2023	0.121827	12.1827	3	1.94591	0.0457134	15.07	0	0	1.16	0.1102	0	0.118216	2.19722	5.65599	C38	电气机械及器材制造业	安徽省	340000	合肥市	340100
523	2011	0.123129	12.3129	3	0.693147	0.0274149	0	0	0	0	0.0935	1	1.08569	1.09861	1.09861	C26	化学原料及化学制品制造业	广东省	440000	广州市	440100
523	2012	0.135497	13.5497	3	1.09861	0.032782	0	0	0	1.03	0.0714	1	0.021023	1.38629	1.79176	C26	化学原料及化学制品制造业	广东省	440000	广州市	440100
523	2013	0.159925	15.9925	3	2.56495	0.0235276	0	0	0	1.0825	0.1978	1	0.02897	1.60944	2.07944	C26	化学原料及化学制品制造业	广东省	440000	广州市	440100
523	2014	0.162596	16.2596	3	2.83321	0.0189201	0	0	0	0.8522	0.1519	1	0.031303	1.38629	2.63906	C26	化学原料及化学制品制造业	广东省	440000	广州市	440100
523	2015	0.168048	16.8048	3	1.94591	0.016098	22	0	0	1.61	0.1265	1	0.023533	1.38629	2.56495	C26	化学原料及化学制品制造业	广东省	440000	广州市	440100
523	2016	0.168621	16.8621	3	2.83321	0.0140152	21	0	0	2.98	0.1112	1	0.620609	1.09861	1.60944	C26	化学原料及化学制品制造业	广东省	440000	广州市	440100
523	2017	0.189627	18.9627	4	2.07944	0.0120449	21.09	0	0	3.65	0.0909	1	0.030768	1.94591	3.13549	C26	化学原料及化学制品制造业	广东省	440000	广州市	440100
523	2018	0.171058	17.1058	4	1.09861	0.0089925	18.23	0	0	3.72	0.0668	1	-0.089798	1.38629	3.13549	C26	化学原料及化学制品制造业	广东省	440000	广州市	440100
523	2019	0.166753	16.6753	4	1.09861	0.0099841	16.76	0	0	2.75	0.0815	1	-0.252436	1.09861	3.09104	C26	化学原料及化学制品制造业	广东省	440000	广州市	440100
523	2022	0.0780429	7.80429	2	1.38629	0.0240675	11.73	0	0	1.9	0.3159	0	-0.051164	0.693147	2.99573	C26	化学原料及化学制品制造业	广东省	440000	广州市	440100
523	2023	0.0572491	5.72491	3	1.60944	0.0051886	9.54	0	0	4.0936	0.1334	0	0.205029	0	0	C26	化学原料及化学制品制造业	广东省	440000	广州市	440100
524	2011	0.0966383	9.66383	1	0	0.0509683	0	0	0	0	0.5882	1	-0.020047	0	0	H61	住宿业	广东省	440000	广州市	440100
524	2012	0.100339	10.0339	1	0	0.0475932	0	0	0	0	0.5372	1	0.029396	0.693147	0	H61	住宿业	广东省	440000	广州市	440100
524	2013	0.0927547	9.27547	1	0	0.0441103	0	0	0	0	0.4993	1	0.049504	0	0	H61	住宿业	广东省	440000	广州市	440100
524	2014	0.0910086	9.10085	1	0	0.0413916	0	0	0	0	0.4589	1	-0.048316	0	0	H61	住宿业	广东省	440000	广州市	440100
524	2015	0.10795	10.795	1	0.693147	0.0368279	0	0	0	0	0.4042	1	0.112838	1.38629	0	H61	住宿业	广东省	440000	广州市	440100
524	2016	0.116379	11.638	1	1.79176	0.0358412	0	0	0	0	0.3778	1	0.011591	1.09861	0	H61	住宿业	广东省	440000	广州市	440100
524	2017	0.0428501	4.28501	1	1.79176	0.131304	0.09	0	0	1.19	0.1281	0	0.763824	1.09861	0	H61	住宿业	广东省	440000	广州市	440100
524	2018	0.0414254	4.14254	1	2.48491	0.124591	1.52	0	0	1.27	0.119	0	0.009605	0	0	H61	住宿业	广东省	440000	广州市	440100
524	2019	0.0556427	5.56427	1	3.2581	0.117356	1.57	0	0	1.36	0.1232	0	0.052957	0.693147	0	H61	住宿业	广东省	440000	广州市	440100
524	2020	0.0511256	5.11256	1	2.56495	0.152185	1.52	0	0	1.3	0.1529	0	-0.128477	0.693147	0	H61	住宿业	广东省	440000	广州市	440100
524	2021	0.0622336	6.22336	1	2.94444	0.164529	1.12	0	0	1.47	0.1648	0	-0.058671	1.38629	0	L72	商务服务业	广东省	440000	广州市	440100
524	2022	0.0557122	5.57122	1	2.30259	0.167416	1.06	0	0	1.86	0.1625	0	-0.084029	1.38629	0	L72	商务服务业	广东省	440000	广州市	440100
524	2023	0.0517873	5.17873	1	2.19722	0.144308	0.94	0	0	1.64	0.1338	0	0.032514	1.38629	0	L72	商务服务业	广东省	440000	广州市	440100
525	2011	0.0442113	4.42113	1	0.693147	0.0443236	0	0	0	0	0.2522	0	2.98469	2.83321	0	C26	化学原料及化学制品制造业	江苏省	320000	南京市	320100
525	2012	0.0633698	6.33698	3	0	0.0363548	0	0	0	5.34	0.1929	0	0.095863	2.94444	0	C26	化学原料及化学制品制造业	江苏省	320000	南京市	320100
525	2013	0.0686892	6.86892	3	0	0.035727	0	0	0	5.3558	0.2448	0	0.017635	3.33221	0	C26	化学原料及化学制品制造业	江苏省	320000	南京市	320100
525	2014	0.34391	34.391	3	0	0.0372665	0	1.60944	100	5.49	0.2765	0	0.113899	2.94444	1.60944	C26	化学原料及化学制品制造业	江苏省	320000	南京市	320100
525	2015	0.45066	36.9914	3	2.70805	0.0505028	24.94	1.09861	100	6.7	0.3862	1	0.004487	2.99573	1.09861	C26	化学原料及化学制品制造业	江苏省	320000	南京市	320100
525	2016	0.133938	13.3938	1	0	0.0432174	24.18	0	0	6.79	0.2923	1	0.216832	2.83321	0	C26	化学原料及化学制品制造业	江苏省	320000	南京市	320100
525	2017	0.15449	15.449	1	1.94591	0.0376588	23.18	0	0	6.69	0.3321	1	0.140491	2.70805	0	C26	化学原料及化学制品制造业	江苏省	320000	南京市	320100
525	2018	0.157631	15.7631	2	1.09861	0.0425658	22.53	0	0	6.72	0.2914	1	0.074576	3.04452	0	C26	化学原料及化学制品制造业	江苏省	320000	南京市	320100
525	2019	0.17128	17.128	3	1.79176	0.0448145	21.12	0	0	6.51	0.2614	1	-0.050044	2.70805	0	C26	化学原料及化学制品制造业	江苏省	320000	南京市	320100
525	2020	0.182056	18.2056	4	1.79176	0.0513152	20.38	0	0	5.92	0.3184	1	-0.105398	2.48491	0	C26	化学原料及化学制品制造业	江苏省	320000	南京市	320100
526	2011	0.0001614	1.22037	1	0	8.73e-05	0	0	0	0	0.0032	0	0.003768	0	0	S90	综合	福建省	350000	厦门市	350200
526	2012	0.0255379	2.55379	1	0	7.45e-05	0	0	0	22.22	0.0041	0	0.029942	0	0	K70	房地产业	福建省	350000	厦门市	350200
526	2013	0.0255261	2.55261	1	0	6.56e-05	0	0	0	22.2223	0.0038	0	-0.041008	0	0	K70	房地产业	福建省	350000	厦门市	350200
526	2014	0.0433308	4.33308	1	0	0	0	0	0	23.53	0.4187	0	0.013146	0	0	K70	房地产业	福建省	350000	厦门市	350200
526	2015	0.0266559	2.66559	1	0	0	0	0	0	15.38	0.2311	0	-0.085498	0	0	K70	房地产业	福建省	350000	厦门市	350200
526	2016	0.0804102	8.04102	1	0	0.0248915	0	0	0	5.89	0.0429	1	-0.689725	0	0	P82	教育	福建省	350000	厦门市	350200
526	2018	0.109162	10.9162	1	2.07944	0.0181774	0.64	0	0	6.05	0.0404	1	0.158366	0.693147	0	P82	教育	福建省	350000	厦门市	350200
526	2019	0.1147	11.47	1	2.63906	0.0157387	0.7	0	0	5.73	0.0378	1	0.199803	0.693147	0	P82	教育	福建省	350000	厦门市	350200
526	2020	0.113616	11.3616	1	2.48491	0.0157417	0.93	0	0	5.51	0.0549	1	0.449961	0.693147	0	P82	教育	福建省	350000	厦门市	350200
526	2021	0.135477	13.5477	3	2.3979	0.0135224	1.03	0	0	5.87	0.0512	1	2.14728	0.693147	0	P82	教育	福建省	350000	厦门市	350200
526	2022	0.133322	13.3322	3	2.19722	0.0099418	1.47	0	0	5.77	0.0536	1	0.018722	0.693147	0	P82	教育	福建省	350000	厦门市	350200
526	2023	0.0577144	5.77144	3	1.79176	0.0080006	0.85	0	0	5.77	0.0521	0	0.390786	0.693147	0	P82	教育	福建省	350000	厦门市	350200
528	2011	0.141848	14.1849	3	0	0.0321053	0	0	0	2.81	0.0958	1	0.103655	1.60944	3.68888	C35	专用设备制造业	广西壮族自治区	450000	柳州市	450200
528	2012	0.116188	11.6188	2	0	0.0359915	0	0	0	3.1	0.1161	1	-0.001478	0	3.4012	C35	专用设备制造业	广西壮族自治区	450000	柳州市	450200
528	2013	0.12818	12.818	2	0	0.0373519	0	0	0	3.6107	0.1388	1	0.004281	1.09861	3.55535	C35	专用设备制造业	广西壮族自治区	450000	柳州市	450200
528	2014	0.206353	20.6353	3	1.09861	0.033353	0	1.38629	5.26316	4.29	0.1242	1	-0.016549	1.09861	4.06044	C35	专用设备制造业	广西壮族自治区	450000	柳州市	450200
528	2015	0.15879	15.879	3	0.693147	0.0318973	11.9	0	0	4.63	0.1191	1	-0.024062	1.09861	3.98898	C35	专用设备制造业	广西壮族自治区	450000	柳州市	450200
528	2016	0.18678	18.678	3	0	0.0331174	10	1.09861	2.5	4.9399	0.1198	1	-0.006633	0.693147	4.39445	C35	专用设备制造业	广西壮族自治区	450000	柳州市	450200
528	2017	0.187521	18.7521	2	1.09861	0.0308234	10.12	1.09861	2	4.79	0.1143	1	0.030475	0.693147	4.61512	C35	专用设备制造业	广西壮族自治区	450000	柳州市	450200
528	2018	0.160156	16.0156	2	1.38629	0.0296524	10.28	0	0	4.65	0.104	1	0.009394	1.60944	4.35671	C35	专用设备制造业	广西壮族自治区	450000	柳州市	450200
528	2019	0.163503	16.3503	2	1.79176	0.0264549	10.66	0	0	5.47	0.0965	1	0.072594	1.38629	4.36945	C35	专用设备制造业	广西壮族自治区	450000	柳州市	450200
528	2020	0.212209	21.2209	4	2.07944	0.0282953	10.04	0.693147	1.21951	4.4	0.0902	1	0.099928	1.60944	4.41884	C35	专用设备制造业	广西壮族自治区	450000	柳州市	450200
528	2021	0.189943	18.9943	3	2.83321	0.0309888	10.39	0	0	5.18	0.1064	1	0.031014	1.94591	4.21951	C35	专用设备制造业	广西壮族自治区	450000	柳州市	450200
528	2022	0.236131	23.6131	2	1.94591	0.0358468	9.59	1.94591	5.76923	5.34	0.116	1	0.062577	1.38629	4.65396	C35	专用设备制造业	广西壮族自治区	450000	柳州市	450200
528	2023	0.136473	13.6473	2	2.30259	0.0311595	11.76	1.09861	1.81818	5.5	0.1314	0	0.04785	1.09861	4.70953	C35	专用设备制造业	广西壮族自治区	450000	柳州市	450200
529	2011	0.0989637	9.89637	1	0.693147	0.122794	0	0	0	1.13	0.1686	1	0.094458	0.693147	0	C13	农副食品加工业	广东省	440000	广州市	440100
529	2012	0.111049	11.105	1	2.3979	0.109911	0	0	0	1.61	0.1581	1	0.078725	0	0	C13	农副食品加工业	广东省	440000	广州市	440100
529	2013	0.105561	10.5561	1	1.09861	0.099385	0	0	0	1.8482	0.1493	1	0.089297	1.09861	0	C13	农副食品加工业	广东省	440000	广州市	440100
529	2014	0.103221	10.3221	1	1.38629	0.0805976	0	0	0	1.94	0.1222	1	0.166618	0.693147	0	C13	农副食品加工业	广东省	440000	广州市	440100
529	2015	0.0390937	3.90937	1	2.48491	0.0800394	0	0	0	2.4	0.1193	0	0.069226	0	0	C13	农副食品加工业	广东省	440000	广州市	440100
529	2016	0.0563069	5.63069	1	3.58352	0.0711438	0	0	0	2.55	0.1111	0	0.075852	0.693147	0	C13	农副食品加工业	广东省	440000	广州市	440100
529	2017	0.0402403	4.02403	1	2.30259	0.0534964	0	0	0	2.55	0.083	0	0.160256	0.693147	0	C13	农副食品加工业	广东省	440000	广州市	440100
529	2018	0.108225	10.8225	1	2.19722	0.0508746	0	0	0	1.43	0.0825	1	0.083909	0.693147	0	C13	农副食品加工业	广东省	440000	广州市	440100
529	2019	0.107815	10.7815	1	2.30259	0.0416352	0	0	0	1.15	0.0643	1	0.143077	0.693147	0	C13	农副食品加工业	广东省	440000	广州市	440100
529	2020	0.104632	10.4632	1	1.94591	0.0278772	2.48	0	0	1.66	0.0416	1	0.140347	0.693147	0	C13	农副食品加工业	广东省	440000	广州市	440100
529	2021	0.0321608	3.21608	1	1.79176	0.0212597	2.39	0	0	1.85	0.042	0	0.123797	0.693147	0	C13	农副食品加工业	广东省	440000	广州市	440100
529	2022	0.0353577	3.53577	1	1.60944	0.028287	5.86	0	0	3.44	0.0535	0	0.260456	0.693147	0	C13	农副食品加工业	广东省	440000	广州市	440100
529	2023	0.0342063	3.42063	1	2.07944	0.0321818	5.46	0	0	3.44	0.0458	0	0.040756	0	0	C13	农副食品加工业	广东省	440000	广州市	440100
530	2011	0.0213142	2.13142	1	0	0.0552625	0	0	0	0	0.1132	0	0.015259	1.60944	0	C34	通用设备制造业	辽宁省	210000	大连市	210200
530	2012	0.0236142	2.36142	1	0	0.0564465	0	0	0	2.77	0.1379	0	0.03446	1.38629	0	C34	通用设备制造业	辽宁省	210000	大连市	210200
530	2013	0.0252671	2.52671	1	0	0.0522986	0	0	0	2.9163	0.1332	0	0.05197	0.693147	1.09861	C34	通用设备制造业	辽宁省	210000	大连市	210200
530	2014	0.0329726	3.29726	1	1.09861	0.0503984	0	0	0	3	0.1357	0	0.027152	1.09861	0	C34	通用设备制造业	辽宁省	210000	大连市	210200
530	2015	0.0553173	5.53173	2	0.693147	0.0388041	14	0	0	2.99	0.1102	0	0.315075	0	2.30259	C34	通用设备制造业	辽宁省	210000	大连市	210200
530	2016	0.121474	12.1474	1	0.693147	0.0310452	14.77	0	0	3.1983	0.1022	1	0.222383	1.09861	1.94591	C34	通用设备制造业	辽宁省	210000	大连市	210200
530	2017	0.16872	16.872	3	1.79176	0.02561	15.52	0	0	3.53	0.1585	1	0.036829	1.38629	2.99573	C34	通用设备制造业	辽宁省	210000	大连市	210200
530	2018	0.196452	19.6452	1	1.60944	0.0264029	15.71	1.09861	10	3.7	0.1712	1	-0.010411	1.09861	3.04452	C34	通用设备制造业	辽宁省	210000	大连市	210200
530	2019	0.12683	12.6829	1	2.07944	0.0256158	15.99	0.693147	12.5	3.98	0.1796	0	-0.001244	1.94591	2.19722	C34	通用设备制造业	辽宁省	210000	大连市	210200
530	2020	0.0475903	4.75903	1	1.09861	0.025599	10.77	0	0	3.02	0.1568	0	-0.001425	1.38629	0.693147	C34	通用设备制造业	辽宁省	210000	大连市	210200
530	2021	0.0518285	5.18285	1	0.693147	0.0248611	17.53	0	0	3.06	0.1491	0	-0.115884	1.09861	1.60944	C34	通用设备制造业	辽宁省	210000	大连市	210200
530	2022	0.104106	10.4106	1	0	0.0221097	14.18	0	0	3.34	0.1617	1	0.003532	1.38629	0	C34	通用设备制造业	辽宁省	210000	大连市	210200
530	2023	0.113904	11.3904	2	1.38629	0.0257942	12.95	0.693147	7.14286	3.34	0.1583	0	0.01433	1.38629	2.70805	C34	通用设备制造业	辽宁省	210000	大连市	210200
531	2011	0.0484438	4.84438	2	0	0.0106739	0	0	0	0	0.5415	0	-0.083015	1.79176	0	D44	电力、热力生产和供应业	广东省	440000	广州市	440100
531	2012	0.0366296	3.66296	1	0.693147	0.0082579	0	0	0	0	0.4267	0	0.111064	1.38629	0	D44	电力、热力生产和供应业	广东省	440000	广州市	440100
531	2013	0.0382599	3.82599	1	0.693147	0.0073298	0	0	0	0	0.3818	0	0.098874	1.79176	0	D44	电力、热力生产和供应业	广东省	440000	广州市	440100
531	2014	0.0415308	4.15308	2	0.693147	0.0097488	0	0	0	0	0.4123	0	0.28257	0.693147	0	D44	电力、热力生产和供应业	广东省	440000	广州市	440100
531	2015	0.0360113	3.60113	1	0.693147	0.0101174	0	0	0	0	0.36	0	0.135187	1.60944	0	D44	电力、热力生产和供应业	广东省	440000	广州市	440100
531	2016	0.0339652	3.39652	1	0.693147	0.0120385	0	0	0	0	0.3535	0	0.085097	1.38629	0	D44	电力、热力生产和供应业	广东省	440000	广州市	440100
531	2017	0.0370241	3.70241	1	0.693147	0.0215527	0	0	0	0	0.3299	0	-0.01604	1.79176	0	D44	电力、热力生产和供应业	广东省	440000	广州市	440100
531	2018	0.0365469	3.65469	2	0.693147	0.0189985	0	0	0	0	0.2724	0	0.005974	0.693147	0	D44	电力、热力生产和供应业	广东省	440000	广州市	440100
531	2019	0.0484691	4.84691	2	0.693147	0.0177534	17.36	0	0	0	0.2574	0	0.031884	0.693147	0	D44	电力、热力生产和供应业	广东省	440000	广州市	440100
531	2020	0.0307615	3.07615	2	0	0.022314	14.7	0	0	0	0.1914	0	0.273978	0	0	D44	电力、热力生产和供应业	广东省	440000	广州市	440100
531	2021	0.0519381	5.19381	2	0.693147	0.0181618	16.65	0	0	0	0.2082	0	-0.005886	1.38629	0	D44	电力、热力生产和供应业	广东省	440000	广州市	440100
531	2022	0.0631587	6.31587	2	0.693147	0.0280641	22	0	0	0	0.2596	0	-0.053131	1.94591	0	D44	电力、热力生产和供应业	广东省	440000	广州市	440100
531	2023	0.0659812	6.59812	2	0.693147	0.0387096	27.54	0	0	0	0.2864	0	0.298799	1.60944	0	D44	电力、热力生产和供应业	广东省	440000	广州市	440100
532	2011	0.12729	12.729	4	0	0.100271	0	0	0	2.23	0.2218	1	-0.154614	0.693147	0	S90	综合	广东省	440000	珠海市	440400
532	2012	0.0933831	9.33831	1	0	0.101567	0	0	0	2.48	0.2104	1	0.00393	0.693147	0	S90	综合	广东省	440000	珠海市	440400
532	2013	0.121222	12.1222	3	0.693147	0.0858278	0	0	0	2.4615	0.1761	1	0.056412	0.693147	0	S90	综合	广东省	440000	珠海市	440400
532	2014	0.119009	11.9009	2	1.09861	0.119266	0	0	0	2.49	0.1573	1	-0.014782	1.09861	0	S90	综合	广东省	440000	珠海市	440400
532	2015	0.148025	14.8025	3	1.94591	0.141942	7	0	0	10.88	0.0563	1	-0.10586	0.693147	0	S90	综合	广东省	440000	珠海市	440400
532	2016	0.114278	11.4278	1	1.79176	0.083865	7.5	0	0	11.0938	0.0326	1	0.053449	0	0	S90	综合	广东省	440000	珠海市	440400
532	2017	0.121746	12.1746	1	1.60944	0.0890641	9.92	0	0	9.62	0.026	1	0.060688	1.09861	0	S90	综合	广东省	440000	珠海市	440400
532	2018	0.113221	11.3221	1	1.09861	0.076563	10.39	0	0	10.23	0.0302	1	0.081414	0.693147	0	S90	综合	广东省	440000	珠海市	440400
532	2019	0.118757	11.8757	1	1.38629	0.0746195	11.64	0	0	11.31	0.0397	1	0.081709	0.693147	0	S90	综合	广东省	440000	珠海市	440400
532	2020	0.131287	13.1287	1	1.09861	0.103554	18.21	0	0	11.26	0.0389	1	0.163699	1.79176	0	S90	综合	广东省	440000	珠海市	440400
532	2021	0.142182	14.2182	2	1.38629	0.081048	21.93	0	0	8.4	0.0359	1	0.147859	1.60944	0	S90	综合	广东省	440000	珠海市	440400
532	2022	0.145213	14.5213	2	1.09861	0.0651345	7.18	0	0	17.29	0.1904	1	0.017695	1.79176	0	S90	综合	广东省	440000	珠海市	440400
532	2023	0.085746	8.5746	2	1.79176	0.0626802	7.67	0	0	18.41	0.1807	0	0.035137	2.07944	0	S90	综合	广东省	440000	珠海市	440400
533	2011	0.01003	1.22037	1	0.693147	0.0025072	0	0	0	0.79	0.0356	0	0.052197	0	0	C38	电气机械及器材制造业	广东省	440000	佛山市	440600
533	2012	0.0320782	3.20782	2	1.09861	0.0156211	0	0	0	0.79	0.0283	0	0.073125	0.693147	0	C38	电气机械及器材制造业	广东省	440000	佛山市	440600
533	2013	0.0453125	4.53125	2	1.38629	0.11606	0	0	0	1.1177	0.0422	0	0.756007	1.09861	0	C38	电气机械及器材制造业	广东省	440000	佛山市	440600
533	2014	0.0421852	4.21852	2	1.09861	0.112426	0	0	0	1.09	0.049	0	0.047292	1.09861	0	C38	电气机械及器材制造业	广东省	440000	佛山市	440600
533	2015	0.115149	11.5149	1	1.94591	0.0806032	14	0	0	1.07	0.0377	1	0.049923	0.693147	0	C38	电气机械及器材制造业	广东省	440000	佛山市	440600
533	2016	0.119247	11.9247	2	1.09861	0.0825951	14.83	0	0	1.0923	0.0713	1	-0.026697	0.693147	0	C38	电气机械及器材制造业	广东省	440000	佛山市	440600
533	2017	0.110214	11.0214	1	1.09861	0.060249	15.62	0	0	1.29	0.0525	1	0.057217	1.09861	0	C38	电气机械及器材制造业	广东省	440000	佛山市	440600
533	2018	0.12842	12.842	2	0.693147	0.103644	19.55	0	0	1.51	0.0896	1	-0.568672	1.60944	0	C38	电气机械及器材制造业	广东省	440000	佛山市	440600
533	2019	0.115476	11.5476	1	0.693147	0.10659	23.25	0	0	1.4	0.088	1	-0.069141	1.09861	0	C38	电气机械及器材制造业	广东省	440000	佛山市	440600
533	2020	0.114952	11.4952	1	1.09861	0.100646	22.05	0	0	1.41	0.0803	1	0.087092	0.693147	0	C38	电气机械及器材制造业	广东省	440000	佛山市	440600
533	2021	0.122797	12.2797	1	1.09861	0.101057	24.92	0	0	1.36	0.078	1	-0.145501	1.38629	0	C38	电气机械及器材制造业	广东省	440000	佛山市	440600
533	2022	0.129821	12.9821	1	1.60944	0.0914984	28.05	0	0	1.44	0.0687	1	0.050611	1.38629	0	C38	电气机械及器材制造业	广东省	440000	佛山市	440600
533	2023	0.0560542	5.60542	1	1.94591	0.0854234	27.41	0	0	1.42	0.0655	0	0.075633	0.693147	0	C38	电气机械及器材制造业	广东省	440000	佛山市	440600
534	2011	0.0949069	9.49069	3	0	0.0196149	0	0	0	0	0.0161	1	-0.016588	0	0	K70	房地产业	广东省	440000	汕头市	440500
534	2012	0.0709238	7.09239	1	0	4.84e-06	0	0	0	0	0.0078	1	0.176463	0	0	K70	房地产业	广东省	440000	汕头市	440500
534	2013	0.0744371	7.44371	1	0	0.0005454	0	0	0	0	0.0964	1	0.123505	0	0	K70	房地产业	广东省	440000	汕头市	440500
534	2014	0.0918907	9.18907	1	1.09861	0.0004074	0	0	0	0	0.0862	1	-0.125663	0.693147	0	K70	房地产业	广东省	440000	汕头市	440500
534	2015	0.0950671	9.50671	2	1.09861	1.96e-06	0	0	0	0	0.0307	1	0.017019	0	0	K70	房地产业	广东省	440000	汕头市	440500
534	2016	0.0932529	9.32529	1	0	0.0279145	11.63	0	0	9.3023	0.0514	1	-0.152229	0	0	K70	房地产业	广东省	440000	汕头市	440500
534	2017	0.104367	10.4367	1	0	0.0385713	17.22	0	0	14.14	0.0751	1	0.09973	0	0	K70	房地产业	广东省	440000	汕头市	440500
534	2018	0.126899	12.6899	1	0	0.0396774	35.49	0	0	22.22	0.0755	1	-0.005994	0	0	K70	房地产业	广东省	440000	汕头市	440500
534	2019	0.113105	11.3105	1	0	0.0827424	24.74	0	0	11.15	0.182	1	-0.458915	0	0	C27	医药制造业	广东省	440000	汕头市	440500
534	2020	0.113447	11.3447	1	0	0.0918963	22.81	0	0	9.89	0.2492	1	0.04645	0	0	C27	医药制造业	广东省	440000	汕头市	440500
534	2021	0.12094	12.0939	1	0.693147	0.115095	21	0	0	8.29	0.2938	1	0.108654	0	0	C27	医药制造业	广东省	440000	汕头市	440500
534	2022	0.121813	12.1813	1	1.09861	0.101773	19.08	0	0	7.13	0.2919	1	0.12796	0	0	C27	医药制造业	广东省	440000	汕头市	440500
534	2023	0.0466088	4.66088	1	1.09861	0.113831	15.25	0	0	6.47	0.2467	0	0.051961	0	0	C27	医药制造业	广东省	440000	汕头市	440500
536	2011	0.112773	11.2773	2	0	0.0206592	0	0	0	0	0.4557	1	0.048166	1.38629	0	C39	计算机、通信和其他电子设备制造业	福建省	350000	福州市	350100
536	2012	0.100928	10.0928	2	0	0.0098662	0	0	0	0.43	0.3076	1	-0.020837	0.693147	0	C39	计算机、通信和其他电子设备制造业	福建省	350000	福州市	350100
536	2013	0.0953288	9.53288	2	0	0.0062852	0	0	0	0	0.1829	1	-0.078289	0.693147	0	C39	计算机、通信和其他电子设备制造业	福建省	350000	福州市	350100
536	2014	0.0961313	9.61313	2	0	0.0060003	0	0	0	0	0.2036	1	0.079472	0.693147	0	C39	计算机、通信和其他电子设备制造业	福建省	350000	福州市	350100
536	2015	0.10316	10.316	1	1.09861	0.0088717	7.88	0	0	0	0.2154	1	-0.242757	0.693147	0	C39	计算机、通信和其他电子设备制造业	福建省	350000	福州市	350100
536	2016	0.126157	12.6157	3	1.38629	0.0151646	5.47	0	0	0	0.092	1	3.32907	1.09861	0	C39	计算机、通信和其他电子设备制造业	福建省	350000	福州市	350100
536	2017	0.0459435	4.59435	2	1.09861	0.014132	4.57	0	0	0	0.3218	0	-0.019289	0.693147	0	C39	计算机、通信和其他电子设备制造业	福建省	350000	福州市	350100
536	2018	0.108097	10.8097	1	0.693147	0.0150192	4.75	0	0	0	0.527	1	-0.41269	0	0.693147	C39	计算机、通信和其他电子设备制造业	福建省	350000	福州市	350100
536	2019	0.255234	25.5234	2	1.79176	0.0188787	7.76	1.09861	33.3333	0	0.5782	1	-0.344259	0.693147	1.94591	C39	计算机、通信和其他电子设备制造业	福建省	350000	福州市	350100
536	2021	0.262191	26.2191	3	3.46574	0.0198271	5.75	0.693147	33.3333	0	0.5871	1	-0.037796	0	1.38629	C39	计算机、通信和其他电子设备制造业	福建省	350000	福州市	350100
536	2022	0.19224	19.224	3	3.33221	0.0317544	9.21	0	0	0	0.6493	1	-0.242558	0.693147	3.21888	C39	计算机、通信和其他电子设备制造业	福建省	350000	福州市	350100
536	2023	0.118402	11.8402	3	2.83321	0.0386272	10.19	0	0	0	0.7053	0	-0.396434	0	3.89182	C39	计算机、通信和其他电子设备制造业	福建省	350000	福州市	350100
537	2011	0.0041763	1.22037	1	0	7.68e-05	0	0	0	3.6	0.0006	0	0.414103	0	0	K70	房地产业	天津市	120000	天津市	120000
537	2012	0.0057561	1.22037	1	0	4.68e-06	0	0	0	5	0.0005	0	0.11582	0	0	K70	房地产业	天津市	120000	天津市	120000
537	2013	0.0065278	1.22037	1	0	1.36e-06	0	0	0	5.6738	0.0004	0	0.364413	0	0	K70	房地产业	天津市	120000	天津市	120000
537	2014	0.0091721	1.22037	1	0	3.9e-07	0	0	0	8	0.0003	0	0.209055	0	0	K70	房地产业	天津市	120000	天津市	120000
537	2015	0.0216569	2.16569	1	0	0	0	0	0	18.95	0.0003	0	0.097256	0	0	K70	房地产业	天津市	120000	天津市	120000
537	2016	0.108408	10.8408	1	1.09861	0	0	0	0	22.63	0.0002	1	0.196017	0	0	K70	房地产业	天津市	120000	天津市	120000
537	2017	0.102763	10.2763	1	1.60944	0.0125892	0	0	0	11.48	0.0202	1	0.264676	0	0	K70	房地产业	天津市	120000	天津市	120000
537	2018	0.111137	11.1137	2	1.09861	0.0111442	0.11	0	0	13.7	0.024	1	-0.108209	0	0	K70	房地产业	天津市	120000	天津市	120000
537	2019	0.120233	12.0233	2	2.07944	0.0038809	0.15	0	0	12.66	0.0231	1	0.27388	0	0	K70	房地产业	天津市	120000	天津市	120000
537	2020	0.134012	13.4012	2	2.3979	0.0035191	0	0	0	16.79	0.0189	1	0.128315	0.693147	0	K70	房地产业	天津市	120000	天津市	120000
537	2021	0.134374	13.4374	2	1.94591	0	0	0	0	26.93	0.0145	1	-0.092466	0	0	K70	房地产业	天津市	120000	天津市	120000
537	2022	0.140458	14.0458	2	1.09861	0.007187	1.16	0	0	15.91	0.5421	1	-0.274973	0.693147	0	K70	房地产业	天津市	120000	天津市	120000
537	2023	0.0630306	6.30306	2	1.94591	0.0050707	0.96	0	0	15.91	0.2895	0	0.16281	0	0	K70	房地产业	天津市	120000	天津市	120000
538	2011	0.150475	15.0475	2	2.63906	0.0268772	0	0	0	2.71	0.1137	1	0.258397	0.693147	3.49651	C27	医药制造业	云南省	530000	昆明市	530100
538	2012	0.122575	12.2575	1	2.30259	0.0214716	0	0	0	2.46	0.1174	1	0.264976	0	2.56495	C27	医药制造业	云南省	530000	昆明市	530100
538	2013	0.123896	12.3896	1	2.70805	0.0173253	0	0	0	3.6222	0.0986	1	0.26841	0	2.07944	C27	医药制造业	云南省	530000	昆明市	530100
538	2014	0.149359	14.9359	2	2.99573	0.0152274	0	0	0	3.63	0.1011	1	0.251012	0	3.63759	C27	医药制造业	云南省	530000	昆明市	530100
538	2015	0.133175	13.3175	1	2.63906	0.0123807	7.96	0	0	3.76	0.085	1	0.197668	0	2.77259	C27	医药制造业	云南省	530000	昆明市	530100
538	2016	0.142989	14.2989	2	2.70805	0.0093936	8.09	0	0	4.11	0.0725	1	0.171182	0	2.48491	C27	医药制造业	云南省	530000	昆明市	530100
538	2017	0.166631	16.6631	3	3.29584	0.0115287	8.45	0	0	4.16	0.063	1	0.145131	0.693147	2.48491	C27	医药制造业	云南省	530000	昆明市	530100
538	2018	0.139358	13.9358	2	3.09104	0.0102654	8.81	0	0	4.16	0.0565	1	0.098086	0	1.38629	C27	医药制造业	云南省	530000	昆明市	530100
538	2019	0.151474	15.1474	2	3.09104	0.0108418	9.21	0	0	4.18	0.0405	1	-0.047639	0.693147	2.30259	C27	医药制造业	云南省	530000	昆明市	530100
538	2020	0.140931	14.0931	1	3.09104	0.0096909	10.21	0	0	4.36	0.0561	1	0.006407	0.693147	2.19722	C27	医药制造业	云南省	530000	昆明市	530100
538	2021	0.202272	20.2272	6	3.78419	0.0133684	13.07	0	0	5.12	0.0568	1	0.002342	0.693147	1.38629	C27	医药制造业	云南省	530000	昆明市	530100
538	2022	0.250751	25.0751	6	3.66356	0.0110836	14.7	0.693147	9.09091	6.27	0.0511	1	0.00239	0.693147	2.48491	C27	医药制造业	云南省	530000	昆明市	530100
538	2023	0.135957	13.5957	6	3.63759	0.0108465	5.97	0	0	6.42	0.0495	0	0.035777	1.09861	2.30259	C27	医药制造业	云南省	530000	昆明市	530100
539	2011	0.118022	11.8022	3	0	0.0124549	0	0	0	0	0.3766	1	0.012773	1.09861	0	D44	电力、热力生产和供应业	广东省	440000	广州市	440100
539	2012	0.139061	13.9061	3	0.693147	0.0181571	0	0	0	2.2	0.5851	1	0.165277	1.38629	0	D44	电力、热力生产和供应业	广东省	440000	广州市	440100
539	2013	0.142835	14.2835	3	0.693147	0.0176958	0	0	0	2.9612	0.6114	1	0.16464	1.60944	0	D44	电力、热力生产和供应业	广东省	440000	广州市	440100
539	2014	0.14564	14.564	3	0.693147	0.0215367	0	0	0	3.26	0.5669	1	0.085632	2.07944	0	D44	电力、热力生产和供应业	广东省	440000	广州市	440100
539	2015	0.135748	13.5748	3	0	0.0231289	0	0	0	2.93	0.6164	1	0.087747	1.60944	0	D44	电力、热力生产和供应业	广东省	440000	广州市	440100
539	2016	0.145793	14.5793	3	0	0.0241591	0	0	0	5.4176	0.5916	1	-0.029304	2.56495	0	D44	电力、热力生产和供应业	广东省	440000	广州市	440100
539	2017	0.0938843	9.38843	3	1.79176	0.0234593	5.13	0	0	3.1766	0.5774	0	0.012486	2.3979	0	D44	电力、热力生产和供应业	广东省	440000	广州市	440100
539	2018	0.0859286	8.59286	3	1.09861	0.0254138	4.41	0	0	3.09	0.5613	0	0.061104	2.48491	0	D44	电力、热力生产和供应业	广东省	440000	广州市	440100
539	2019	0.0668184	6.68184	2	0.693147	0.0236874	4.83	0	0	3.01	0.5109	0	0.084773	2.30259	0	D44	电力、热力生产和供应业	广东省	440000	广州市	440100
539	2020	0.0540815	5.40815	1	0	0.0249111	10.79	0	0	3.19	0.549	0	0.045444	2.30259	0	D44	电力、热力生产和供应业	广东省	440000	广州市	440100
539	2021	0.0753691	7.53691	3	0	0.0232668	11.65	0	0	2.87	0.4983	0	-0.249442	1.79176	0.693147	D44	电力、热力生产和供应业	广东省	440000	广州市	440100
539	2022	0.077085	7.7085	3	0.693147	0.0254496	15.08	0	0	3.62	0.4745	0	-0.128762	1.38629	0	D44	电力、热力生产和供应业	广东省	440000	广州市	440100
539	2023	0.0599662	5.99662	2	1.09861	0.0215884	14.1	0	0	3.48	0.3909	0	0.175762	0.693147	0	D44	电力、热力生产和供应业	广东省	440000	广州市	440100
540	2021	0.152595	15.2595	4	2.99573	0.0023894	0	0	0	12.77	0.021	1	-0.485822	0	0	K70	房地产业	贵州省	520000	贵阳市	520100
541	2011	0.222389	22.2389	4	0	0.0692866	0	1.09861	22.2222	0	0.2038	1	0.009304	1.09861	2.30259	C38	电气机械及器材制造业	广东省	440000	佛山市	440600
541	2012	0.14236	14.236	4	0	0.0436231	0	0	0	0	0.1564	1	0.055968	1.60944	2.19722	C38	电气机械及器材制造业	广东省	440000	佛山市	440600
541	2013	0.145923	14.5923	3	0	0.0513473	0	0	0	0	0.1401	1	-0.023961	1.94591	3.91202	C38	电气机械及器材制造业	广东省	440000	佛山市	440600
541	2014	0.154416	15.4416	3	0.693147	0.0500746	0	0	0	0	0.124	1	0.057809	1.94591	4.14314	C38	电气机械及器材制造业	广东省	440000	佛山市	440600
541	2015	0.135029	13.5029	3	0.693147	0.0270964	2.88	0	0	0	0.0801	1	0.634429	0.693147	3.04452	C38	电气机械及器材制造业	广东省	440000	佛山市	440600
541	2016	0.130689	13.0689	3	0	0.0262829	2.78	0	0	0	0.0731	1	-0.010334	0.693147	3.55535	C38	电气机械及器材制造业	广东省	440000	佛山市	440600
541	2017	0.152859	15.2859	3	1.60944	0.0274048	2.82	0	0	0	0.0852	1	-0.041123	0.693147	4.12713	C38	电气机械及器材制造业	广东省	440000	佛山市	440600
541	2018	0.200326	20.0326	4	1.60944	0.0309091	7.29	0.693147	1.20482	0	0.0916	1	-0.095491	1.60944	4.43082	C38	电气机械及器材制造业	广东省	440000	佛山市	440600
541	2019	0.20806	20.806	4	2.30259	0.0271775	8.38	0.693147	1.47059	0	0.102	1	0.130398	1.60944	4.23411	C38	电气机械及器材制造业	广东省	440000	佛山市	440600
541	2020	0.193849	19.3849	2	1.79176	0.0200361	10.81	1.09861	1.23457	0.44	0.0805	1	0.269833	1.09861	5.09375	C38	电气机械及器材制造业	广东省	440000	佛山市	440600
541	2021	0.153475	15.3475	3	2.19722	0.0280088	13.2	1.38629	1.72414	0.7	0.1364	0	-0.005667	1.09861	5.16479	C38	电气机械及器材制造业	广东省	440000	佛山市	440600
541	2022	0.17269	17.2691	3	2.63906	0.0222519	14.89	1.38629	1.10294	1.44	0.2295	0	-0.187101	1.94591	5.60947	C38	电气机械及器材制造业	广东省	440000	佛山市	440600
541	2023	0.189861	18.9861	5	2.3979	0.0256607	14.17	1.38629	1.65746	1.65	0.2039	0	0.136177	1.94591	5.20401	C38	电气机械及器材制造业	广东省	440000	佛山市	440600
543	2011	0.0491297	4.91297	1	0.693147	0.0299117	0	0	0	0	0.538	0	-0.077492	2.19722	0	D44	电力、热力生产和供应业	安徽省	340000	合肥市	340100
543	2012	0.0471221	4.71221	1	0	0.0283251	0	0	0	0.72	0.6603	0	0.154901	2.19722	0	D44	电力、热力生产和供应业	安徽省	340000	合肥市	340100
543	2013	0.0385871	3.85871	1	0	0.0267131	0	0	0	1.14	0.6708	0	0.49298	1.09861	0	D44	电力、热力生产和供应业	安徽省	340000	合肥市	340100
543	2014	0.0459784	4.59784	1	0	0.0248162	0	0	0	1	0.6053	0	0.254465	2.30259	0	D44	电力、热力生产和供应业	安徽省	340000	合肥市	340100
543	2015	0.0377334	3.77334	1	0	0.0245514	0	0	0	1.62	0.5764	0	0.046884	1.38629	0	D44	电力、热力生产和供应业	安徽省	340000	合肥市	340100
543	2016	0.0416029	4.16029	1	0	0.0200588	0	0	0	1.7406	0.4589	0	0.135703	2.3979	0	D44	电力、热力生产和供应业	安徽省	340000	合肥市	340100
543	2017	0.0417179	4.17179	1	0	0.0198431	0	0	0	2.04	0.5225	0	-0.073556	2.07944	0	D44	电力、热力生产和供应业	安徽省	340000	合肥市	340100
543	2018	0.0455053	4.55053	1	0	0.0248474	0	0	0	2.15	0.6083	0	0.04432	2.07944	0	D44	电力、热力生产和供应业	安徽省	340000	合肥市	340100
543	2019	0.0431232	4.31232	1	0	0.0224979	0	0	0	2.17	0.5021	0	0.267056	2.30259	0	D44	电力、热力生产和供应业	安徽省	340000	合肥市	340100
543	2020	0.129465	12.9465	1	0	0.0227576	27	0	0	2.15	0.4539	1	0.061055	2.07944	0	D44	电力、热力生产和供应业	安徽省	340000	合肥市	340100
543	2021	0.158684	15.8683	2	1.60944	0.0185173	31.01	0	0	2.51	0.3606	1	-0.138344	2.19722	0	D44	电力、热力生产和供应业	安徽省	340000	合肥市	340100
543	2022	0.151954	15.1954	2	1.60944	0.0166296	21.61	0	0	2.99	0.3514	1	0.017469	2.19722	0	D44	电力、热力生产和供应业	安徽省	340000	合肥市	340100
543	2023	0.0844127	8.44127	2	1.60944	0.058934	22.17	0	0	3.07	0.4093	0	-0.005076	1.94591	0	D44	电力、热力生产和供应业	安徽省	340000	合肥市	340100
544	2011	0.0362808	3.62808	1	0	0.238479	0	0	0	2.67	0.1997	0	0.145656	1.38629	0	N78	公共设施管理业	河南省	410000	郑州市	410100
544	2012	0.0322937	3.22937	1	0	0.217533	0	0	0	3.85	0.2443	0	0.153225	0.693147	0	D46	水的生产和供应业	河南省	410000	郑州市	410100
544	2013	0.0267941	2.67941	1	0	0.228593	0	0	0	3.6517	0.2442	0	0.086745	0	0	D46	水的生产和供应业	河南省	410000	郑州市	410100
544	2014	0.037598	3.7598	1	0	0.389282	0	0	0	3.72	0.2847	0	0.069318	0	0	D46	水的生产和供应业	河南省	410000	郑州市	410100
544	2015	0.0407952	4.07952	1	0	0.418354	0	0	0	0	0.2819	0	0.103507	0.693147	0	D46	水的生产和供应业	河南省	410000	郑州市	410100
544	2016	0.0613158	6.13158	1	0	0.287595	0	0	0	4.62	0.4624	0	0.343271	1.94591	0.693147	D46	水的生产和供应业	河南省	410000	郑州市	410100
544	2017	0.071818	7.1818	1	1.09861	0.256692	7.23	0	0	5.53	0.4354	0	0.060329	1.94591	0	D46	水的生产和供应业	河南省	410000	郑州市	410100
544	2018	0.35106	35.106	1	1.60944	0.191162	9.07	1.60944	100	8.27	0.3314	0	0.091564	1.94591	1.60944	D46	水的生产和供应业	河南省	410000	郑州市	410100
544	2019	0.272898	27.2898	2	0	0.161223	7.83	2.48491	52.3809	8.58	0.2808	0	0.05748	2.07944	3.09104	D46	水的生产和供应业	河南省	410000	郑州市	410100
544	2020	0.227132	22.7132	2	0	0.135321	6.83	2.48491	36.6667	9.79	0.1646	0	0.066312	1.09861	3.43399	D46	水的生产和供应业	河南省	410000	郑州市	410100
544	2021	0.187689	18.7689	1	0.693147	0.134537	8.08	2.48491	18.9655	12.18	0.1239	0	0.054312	0.693147	4.07754	D46	水的生产和供应业	河南省	410000	郑州市	410100
544	2022	0.200677	20.0677	1	0.693147	0.111832	7.47	2.19722	32	13.33	0.0959	0	0.044081	0.693147	3.2581	D46	水的生产和供应业	河南省	410000	郑州市	410100
544	2023	0.209116	20.9116	1	0	0.267608	10.66	2.30259	32.1429	11.99	0.0654	0	-0.305355	1.09861	3.3673	D46	水的生产和供应业	河南省	410000	郑州市	410100
545	2013	0.0493068	4.93068	1	0.693147	0.0455061	0	0	0	2.03	0.4864	0	0.14403	2.07944	0	C26	化学原料及化学制品制造业	吉林省	220000	吉林市	220200
545	2014	0.0302801	3.02801	2	0	0.0245399	0	0	0	1.23	0.2606	0	1.15381	0.693147	0	C26	化学原料及化学制品制造业	吉林省	220000	吉林市	220200
545	2015	0.125376	12.5376	2	1.09861	0.0199542	6.82	0	0	0.83	0.2352	1	0.086991	1.79176	0	C26	化学原料及化学制品制造业	吉林省	220000	吉林市	220200
545	2016	0.126527	12.6527	2	0	0.0247029	6.59	0	0	1.2071	0.4677	1	0.078072	2.19722	0	C26	化学原料及化学制品制造业	吉林省	220000	吉林市	220200
545	2017	0.13526	13.5259	2	0	0.0191693	12.57	0	0	1.4	0.4444	1	0.052989	2.83321	0	C26	化学原料及化学制品制造业	吉林省	220000	吉林市	220200
545	2018	0.133362	13.3362	2	0	0.0163711	13.72	0	0	1.49	0.3764	1	0.024592	2.83321	0	C26	化学原料及化学制品制造业	吉林省	220000	吉林市	220200
545	2019	0.1334	13.34	2	0	0.0161363	13.74	0	0	1.82	0.3809	1	0.011378	2.77259	0	C26	化学原料及化学制品制造业	吉林省	220000	吉林市	220200
545	2020	0.145686	14.5686	2	1.09861	0.0171904	14.21	0	0	1.45	0.3895	1	-0.129829	2.77259	0	C26	化学原料及化学制品制造业	吉林省	220000	吉林市	220200
545	2021	0.135293	13.5293	2	1.09861	0.0157328	15.71	0	0	1.72	0.3433	1	0.062025	1.60944	0	C26	化学原料及化学制品制造业	吉林省	220000	吉林市	220200
545	2022	0.134416	13.4416	2	1.09861	0.0231471	12.7	0	0	1.86	0.3223	1	-0.021924	1.79176	0	C26	化学原料及化学制品制造业	吉林省	220000	吉林市	220200
545	2023	0.0697352	6.97352	2	1.09861	0.0237741	11.5	0	0	1.86	0.3832	0	-0.19963	2.30259	0	C26	化学原料及化学制品制造业	吉林省	220000	吉林市	220200
546	2011	0.070896	7.0896	1	0	0.0012006	0	0	0	0	0.0054	1	0.127661	0	0	K70	房地产业	吉林省	220000	长春市	220100
546	2012	0.002925	1.22037	1	0	0.0252427	0	0	0	0	0.0371	0	0.024618	0	0	K70	房地产业	吉林省	220000	长春市	220100
546	2013	0.0155112	1.55112	1	0	0.0361329	0	0	0	0	0.1037	0	0.124471	1.09861	0	K70	房地产业	吉林省	220000	长春市	220100
546	2014	0.0346859	3.46859	1	0	0.0355742	0	0	0	0	0.6798	0	0.165611	0.693147	0	C30	非金属矿物制品业	吉林省	220000	长春市	220100
546	2015	0.103113	10.3113	1	0	0.0225093	0	0	0	0	0.5562	1	0.166431	1.09861	0	C30	非金属矿物制品业	吉林省	220000	长春市	220100
546	2016	0.0574446	5.74446	3	0	0.0238981	0	0	0	0	0.5521	0	0.1668	1.38629	0	C30	非金属矿物制品业	吉林省	220000	长春市	220100
546	2017	0.138807	13.8807	3	0	0.0338548	10.52	0	0	0	0.4194	1	0.659506	2.30259	0	C30	非金属矿物制品业	吉林省	220000	长春市	220100
546	2018	0.143348	14.3348	3	0	0.0311182	18.85	0	0	0	0.434	1	0.101764	2.07944	0	N77	生态保护和环境治理业	吉林省	220000	长春市	220100
546	2019	0.13801	13.801	3	0	0.0365208	10.81	0	0	0	0.4386	1	0.150417	2.07944	0	N77	生态保护和环境治理业	吉林省	220000	长春市	220100
546	2020	0.1389	13.89	3	0	0.0317179	12.51	0	0	0	0.4114	1	0.080162	2.19722	0	N77	生态保护和环境治理业	吉林省	220000	长春市	220100
546	2021	0.134973	13.4973	2	0	0.123974	13.05	0	0	0	0.3593	1	0.159437	2.63906	0	N77	生态保护和环境治理业	吉林省	220000	长春市	220100
546	2022	0.125852	12.5852	2	0	0.180038	6.03	0	0	0	0.1919	1	-0.079326	2.56495	0	N77	生态保护和环境治理业	吉林省	220000	长春市	220100
546	2023	0.0987516	9.87516	5	0.693147	0.212727	3.19	0	0	0	0.2867	0	-0.151207	2.3979	0	N77	生态保护和环境治理业	吉林省	220000	长春市	220100
547	2011	0.039107	3.9107	2	0.693147	0.0142116	0	0	0	10.46	0.0409	0	0.222125	0.693147	0	C39	计算机、通信和其他电子设备制造业	福建省	350000	福州市	350100
547	2012	0.0226051	2.26051	1	0.693147	0.0116258	0	0	0	11.42	0.0339	0	0.068826	0	0	C39	计算机、通信和其他电子设备制造业	福建省	350000	福州市	350100
547	2013	0.0274082	2.74082	1	0.693147	0.0111334	0	0	0	14.9646	0.054	0	0.009396	0	0	C39	计算机、通信和其他电子设备制造业	福建省	350000	福州市	350100
547	2014	0.0169895	1.69895	1	0	0.0278649	0	0	0	11.6134	0.0539	0	0.369678	0	0	C39	计算机、通信和其他电子设备制造业	福建省	350000	福州市	350100
547	2015	0.0668125	6.68125	1	1.09861	0.0256169	44.89	0	0	16.73	0.0356	0	11.3422	0	0	C39	计算机、通信和其他电子设备制造业	福建省	350000	福州市	350100
547	2016	0.0730611	7.30611	1	1.38629	0.0274337	46.71	0	0	17.647	0.0606	0	-0.03072	0	0	C39	计算机、通信和其他电子设备制造业	福建省	350000	福州市	350100
547	2017	0.0901404	9.01404	2	1.94591	0.0388457	40.19	0	0	20.2	0.0827	0	0.050268	0	0	C39	计算机、通信和其他电子设备制造业	福建省	350000	福州市	350100
547	2018	0.0852455	8.52455	1	2.83321	0.038026	36.82	0	0	20.06	0.0662	0	0.242202	0	0	C39	计算机、通信和其他电子设备制造业	福建省	350000	福州市	350100
547	2019	0.0961713	9.61713	1	3.49651	0.0401708	39.7	0	0	21.46	0.0635	0	0.131756	0	0	C39	计算机、通信和其他电子设备制造业	福建省	350000	福州市	350100
547	2020	0.101392	10.1392	1	3.80666	0.0394791	43.87	0	0	20.82	0.053	0	0.136616	0	0	C39	计算机、通信和其他电子设备制造业	福建省	350000	福州市	350100
547	2021	0.185917	18.5917	2	4.12713	0.0455845	39.9	0	0	22.45	0.0492	1	0.071594	0	0	C39	计算机、通信和其他电子设备制造业	福建省	350000	福州市	350100
547	2022	0.203286	20.3286	3	4.11087	0.0399475	47.11	0	0	23.65	0.0492	1	0.020934	0	0	C39	计算机、通信和其他电子设备制造业	福建省	350000	福州市	350100
547	2023	0.135042	13.5042	3	3.82864	0.0416467	54.19	0	0	23.65	0.0541	0	-0.223107	0	0	C39	计算机、通信和其他电子设备制造业	福建省	350000	福州市	350100
548	2011	0.0603398	6.03398	2	1.60944	0.188611	0	0	0	5.31	0.1366	0	0.014004	1.09861	0	G58	装卸搬运和运输代理业	湖南省	430000	长沙市	430100
548	2012	0.0392421	3.92421	2	0.693147	0.173533	0	0	0	5.02	0.1219	0	0.019785	0	0	G54	道路运输业	湖南省	430000	长沙市	430100
548	2013	0.0254086	2.54086	1	0.693147	0.183164	0	0	0	2.1656	0.1257	0	-0.020067	0	0	G54	道路运输业	湖南省	430000	长沙市	430100
548	2014	0.0229073	2.29073	1	0	0.17335	0	0	0	1.67	0.1328	0	0.012457	0.693147	0	G54	道路运输业	湖南省	430000	长沙市	430100
548	2015	0.0321155	3.21155	2	0	0.153849	0	0	0	1.49	0.1137	0	-0.01365	0.693147	0	G54	道路运输业	湖南省	430000	长沙市	430100
548	2016	0.0134473	1.34472	1	0	0.123462	0	0	0	1.3	0.125	0	0.033426	0	0	G54	道路运输业	湖南省	430000	长沙市	430100
548	2017	0.0260167	2.60167	2	0	0.131328	0	0	0	1.24	0.1483	0	0.056882	0	0	G54	道路运输业	湖南省	430000	长沙市	430100
548	2018	0.0469109	4.69109	1	1.94591	0.119621	0	0	0	1.66	0.1319	0	0.002059	1.38629	0	G54	道路运输业	湖南省	430000	长沙市	430100
548	2019	0.0338702	3.38702	2	0	0.103925	0	0	0	2.34	0.1181	0	0.021814	1.09861	0	G54	道路运输业	湖南省	430000	长沙市	430100
548	2020	0.103884	10.3884	2	0	0.0965429	0	0	0	2.93	0.0972	1	0.072085	1.09861	0	G54	道路运输业	湖南省	430000	长沙市	430100
548	2021	0.0875279	8.75279	1	0	0.0719883	0	0	0	3.54	0.0735	1	0.023359	0.693147	0	G54	道路运输业	湖南省	430000	长沙市	430100
548	2022	0.0947504	9.47504	1	0.693147	0.0510198	0	0	0	4.87	0.0568	1	0.013605	0.693147	0	G54	道路运输业	湖南省	430000	长沙市	430100
548	2023	0.0111978	1.22037	1	0	0.0522943	0	0	0	5.17	0.0584	0	0.074527	0	0	G54	道路运输业	湖南省	430000	长沙市	430100
550	2011	0.158705	15.8705	3	0	0.0248143	0	0.693147	0.724638	0	0.1929	1	0.189749	0	4.93447	C36	汽车制造业	江西省	360000	南昌市	360100
550	2012	0.159052	15.9052	3	0	0.0215464	0	0.693147	0.980392	2.44	0.1756	1	0.102614	0	4.63473	C36	汽车制造业	江西省	360000	南昌市	360100
550	2013	0.12141	12.141	1	0	0.0378457	0	0	0	3.3719	0.2601	1	0.120598	0	4.86754	C36	汽车制造业	江西省	360000	南昌市	360100
550	2014	0.155057	15.5056	2	0	0.0317667	0	0.693147	1.5873	3.1134	0.2285	1	0.155268	0.693147	4.15888	C36	汽车制造业	江西省	360000	南昌市	360100
550	2015	0.171434	17.1434	2	0	0.0324858	13.44	0.693147	0.735294	6	0.2226	1	0.130464	0.693147	4.91998	C36	汽车制造业	江西省	360000	南昌市	360100
550	2016	0.19392	19.392	3	0	0.0302972	13.19	1.09861	2.35294	5.4847	0.2282	1	0.035731	0.693147	4.45435	C36	汽车制造业	江西省	360000	南昌市	360100
550	2017	0.233287	23.3287	3	1.79176	0.0306263	13.94	1.60944	2.77778	5.43	0.2288	1	0.013149	0.693147	4.97673	C36	汽车制造业	江西省	360000	南昌市	360100
550	2018	0.248478	24.8478	2	2.30259	0.0358299	16.28	2.07944	4.04624	6.12	0.2427	1	-0.174024	0.693147	5.15906	C36	汽车制造业	江西省	360000	南昌市	360100
550	2019	0.2218	22.18	1	2.48491	0.0390458	18.65	1.38629	1.23967	7.21	0.2352	1	0.010792	1.09861	5.49306	C36	汽车制造业	江西省	360000	南昌市	360100
550	2020	0.225432	22.5432	1	2.77259	0.0330454	17.73	1.60944	1.63265	6.89	0.1833	1	0.046673	0.693147	5.50533	C36	汽车制造业	江西省	360000	南昌市	360100
550	2021	0.296961	29.6962	2	2.56495	0.0407405	17.9	3.3673	7.29167	6.88	0.2287	1	-0.221275	0	5.95324	C36	汽车制造业	江西省	360000	南昌市	360100
550	2022	0.279839	27.9839	2	2.48491	0.0435049	19.05	2.77259	6.63717	7.16	0.1983	1	0.08009	0.693147	5.42495	C36	汽车制造业	江西省	360000	南昌市	360100
550	2023	0.209815	20.9815	2	2.3979	0.0580286	21.32	2.89037	7.02479	7.81	0.1849	0	0.080538	0	5.49306	C36	汽车制造业	江西省	360000	南昌市	360100
551	2011	0.0472947	4.72947	2	1.09861	0.0635535	0	0	0	1.2	0.2464	0	0.034044	1.09861	0	S90	综合	江苏省	320000	苏州市	320500
551	2012	0.129311	12.9311	2	1.60944	0.0632814	0	0	0	1.78	0.2687	1	0.002598	1.60944	0	S90	综合	江苏省	320000	苏州市	320500
551	2013	0.119325	11.9325	2	0.693147	0.0500901	0	0	0	1.9481	0.2829	1	0.040206	1.60944	0	S90	综合	江苏省	320000	苏州市	320500
551	2014	0.144957	14.4957	3	1.79176	0.0510177	0	0	0	2.36	0.2908	1	0.024945	1.79176	0	S90	综合	江苏省	320000	苏州市	320500
551	2015	0.138287	13.8287	3	0	0.0493845	14.52	0	0	2.19	0.2698	1	-0.024845	2.19722	0	S90	综合	江苏省	320000	苏州市	320500
551	2016	0.0877953	8.77953	3	2.3979	0.0373125	0.18	0	0	2.43	0.2074	0	0.197968	3.04452	0	S90	综合	江苏省	320000	苏州市	320500
551	2017	0.047063	4.7063	1	0	0.0354371	18.79	0	0	2.74	0.2003	0	0.031079	2.3979	0	S90	综合	江苏省	320000	苏州市	320500
551	2018	0.0822957	8.22957	3	1.09861	0.0331984	18.52	0	0	2.97	0.1838	0	0.015139	2.56495	0	S90	综合	江苏省	320000	苏州市	320500
551	2019	0.0871875	8.71875	3	1.09861	0.0336199	24.51	0	0	4.02	0.2028	0	0.11149	2.3979	0	S90	综合	江苏省	320000	苏州市	320500
551	2020	0.0820463	8.20463	4	0	0.033342	24.27	0	0	4.36	0.1826	0	0.107177	1.94591	0	S90	综合	江苏省	320000	苏州市	320500
551	2021	0.057328	5.7328	1	0	0.0298744	25.09	0	0	4.07	0.1748	0	0.049115	3.04452	0	S90	综合	江苏省	320000	苏州市	320500
551	2022	0.0638662	6.38662	1	0.693147	0.0282901	25.27	0	0	4.78	0.1489	0	0.159026	2.94444	0	S90	综合	江苏省	320000	苏州市	320500
551	2023	0.0787613	7.87613	1	2.19722	0.0277277	26.45	0	0	5.62	0.1477	0	0.027225	2.56495	0	S90	综合	江苏省	320000	苏州市	320500
552	2011	0.0230504	2.30504	1	0	0.118604	0	0	0	0	0.2639	0	0.151627	0.693147	0	B06	煤炭开采和洗选业	甘肃省	620000	白银市	620400
552	2012	0.0403219	4.03219	1	0	0.352965	0	0	0	0.24	0.1591	0	0.254368	1.60944	0	B06	煤炭开采和洗选业	甘肃省	620000	白银市	620400
552	2013	0.0364677	3.64677	1	0	0.301735	0	0	0	0.1841	0.1368	0	0.203237	1.60944	0	B06	煤炭开采和洗选业	甘肃省	620000	白银市	620400
552	2014	0.0352156	3.52156	1	0	0.265555	0	0	0	0.22	0.1169	0	0.039344	1.79176	0	B06	煤炭开采和洗选业	甘肃省	620000	白银市	620400
552	2015	0.0370827	3.70827	1	0	0.182779	0	0	0	0.3	0.3685	0	1.26029	1.38629	0	B06	煤炭开采和洗选业	甘肃省	620000	白银市	620400
552	2016	0.0359113	3.59113	1	0	0.183414	0	0	0	0.3044	0.3386	0	0.026123	1.38629	0	B06	煤炭开采和洗选业	甘肃省	620000	白银市	620400
552	2017	0.0416285	4.16285	1	0.693147	0.16506	0	0	0	0.32	0.3179	0	0.093484	1.38629	0	B06	煤炭开采和洗选业	甘肃省	620000	白银市	620400
552	2018	0.0413483	4.13483	1	0.693147	0.155791	0.32	0	0	0.32	0.3183	0	0.062695	1.38629	0	B06	煤炭开采和洗选业	甘肃省	620000	白银市	620400
552	2019	0.0445022	4.45022	1	0.693147	0.18592	0.32	0	0	0.33	0.3064	0	0.051647	1.60944	0	B06	煤炭开采和洗选业	甘肃省	620000	白银市	620400
552	2020	0.0319505	3.19505	1	0	0.146349	0.09	0	0	0.3	0.2416	0	0.097217	1.60944	0	B06	煤炭开采和洗选业	甘肃省	620000	白银市	620400
552	2021	0.0350539	3.50539	2	0	0.140003	1.21	0	0	0.3074	0.2204	0	0.034494	0.693147	0	B06	煤炭开采和洗选业	甘肃省	620000	白银市	620400
552	2022	0.0567497	5.67497	2	0	0.19288	2.91	0	0	0.45	0.2972	0	0.281682	1.79176	0.693147	B06	煤炭开采和洗选业	甘肃省	620000	白银市	620400
552	2023	0.0509346	5.09346	2	0.693147	0.166084	2.87	0	0	0.41	0.273	0	0.234134	1.09861	0	B06	煤炭开采和洗选业	甘肃省	620000	白银市	620400
553	2011	0.032588	3.2588	1	0	0.0643156	0	0	0	0.39	0.486	0	0.016521	1.09861	0	C26	化学原料及化学制品制造业	湖北省	420000	荆州市	421000
553	2012	0.0504513	5.04513	2	0	0.0598231	0	0	0	0.58	0.544	0	0.085278	1.60944	0	C26	化学原料及化学制品制造业	湖北省	420000	荆州市	421000
553	2013	0.0567859	5.67859	2	0	0.0507228	0	0	0	0.8011	0.489	0	0.222623	2.63906	0	C26	化学原料及化学制品制造业	湖北省	420000	荆州市	421000
553	2014	0.0605563	6.05563	3	0	0.0477187	0	0	0	0.7296	0.4256	0	0.298074	2.07944	0	C26	化学原料及化学制品制造业	湖北省	420000	荆州市	421000
553	2015	0.13531	13.531	3	0	0.0556114	1.07	0	0	0.64	0.5656	1	0.044828	1.79176	0	C26	化学原料及化学制品制造业	湖北省	420000	荆州市	421000
553	2016	0.12884	12.884	2	0	0.0696054	1.16	0	0	0.7523	0.5375	1	-0.044019	1.79176	0.693147	C26	化学原料及化学制品制造业	湖北省	420000	荆州市	421000
553	2017	0.130177	13.0177	3	0	0.101898	3.63	0	0	0.88	0.155	1	0.109956	1.60944	1.09861	C26	化学原料及化学制品制造业	湖北省	420000	荆州市	421000
553	2018	0.117063	11.7063	1	0.693147	0.13261	3.84	0	0	0.88	0.1549	1	0.186501	1.94591	0.693147	C26	化学原料及化学制品制造业	湖北省	420000	荆州市	421000
553	2019	0.121759	12.1759	2	0	0.128857	3.47	0	0	0.3483	0.1532	1	-0.016408	2.19722	0.693147	C26	化学原料及化学制品制造业	湖北省	420000	荆州市	421000
553	2020	0.118022	11.8022	2	0	0.111674	3.34	0	0	1.98	0.1405	1	-0.041917	2.30259	0	C26	化学原料及化学制品制造业	湖北省	420000	荆州市	421000
553	2021	0.129755	12.9755	3	0	0.106027	2.86	0	0	1.7824	0.1602	1	-0.016741	1.79176	0.693147	C26	化学原料及化学制品制造业	湖北省	420000	荆州市	421000
553	2022	0.142952	14.2952	4	0.693147	0.0921474	3.01	0	0	1.9548	0.1544	1	0.097251	1.79176	0	C26	化学原料及化学制品制造业	湖北省	420000	荆州市	421000
553	2023	0.351203	35.1203	6	1.09861	0.0959878	3.26	1.79176	83.3333	5.35	0.1812	0	-0.0519	1.60944	1.94591	C26	化学原料及化学制品制造业	湖北省	420000	荆州市	421000
554	2011	0.0275538	2.75538	1	0	0.202152	0	0	0	0	0.4077	0	0.010558	0	0	F51	批发业	山东省	370000	泰安市	370900
554	2012	0.0270562	2.70562	1	0	0.241889	0	0	0	0	0.3376	0	0.01916	0	0	F51	批发业	山东省	370000	泰安市	370900
554	2013	0.0296372	2.96372	1	0	0.28543	0	0	0	0	0.3403	0	0.016259	0	0	F51	批发业	山东省	370000	泰安市	370900
554	2014	0.0381863	3.81863	1	0	0.308032	0	0	0	0	0.3751	0	0.006232	0.693147	0	F51	批发业	山东省	370000	泰安市	370900
554	2015	0.0340136	3.40137	1	0	0.311655	0	0	0	0	0.4137	0	-0.004853	0	0	F51	批发业	山东省	370000	泰安市	370900
554	2016	0.0470989	4.70989	1	0.693147	0.295327	0	0	0	0	0.428	0	0.005097	0.693147	0	F51	批发业	山东省	370000	泰安市	370900
554	2017	0.0411807	4.11807	1	0	0.266759	0	0	0	0	0.4232	0	0.003099	1.09861	0	F51	批发业	山东省	370000	泰安市	370900
554	2018	0.039718	3.9718	1	0	0.236611	0	0	0	0	0.4296	0	-0.019465	1.09861	0	F51	批发业	山东省	370000	泰安市	370900
554	2019	0.0386108	3.86108	1	0	0.219125	0	0	0	0	0.4267	0	0.006708	1.09861	0	F51	批发业	山东省	370000	泰安市	370900
554	2020	0.0443493	4.43493	1	0.693147	0.190403	0	0	0	0	0.3598	0	0.008149	1.38629	0	F51	批发业	山东省	370000	泰安市	370900
554	2021	0.0773804	7.73804	2	2.30259	0.181803	0	0	0	0	0.3295	0	0.008197	2.07944	0	F51	批发业	山东省	370000	泰安市	370900
554	2022	0.0452807	4.52807	2	1.60944	0.13368	0	0	0	0	0.2247	0	0.014067	0	0	F51	批发业	山东省	370000	泰安市	370900
554	2023	0.104997	10.4998	2	0.693147	0.139052	0	0.693147	10	0	0.2546	0	0.027479	1.09861	2.3979	F51	批发业	山东省	370000	泰安市	370900
555	2014	0.133452	13.3452	2	3.46574	0.0055594	0	0	0	10.9	0.0262	1	0.539487	0	0	I65	软件和信息技术服务业	广东省	440000	深圳市	440300
555	2015	0.17668	17.6681	1	4.2485	0.0037701	65.57	0	0	9.87	0.0195	1	0.114466	0	0	I65	软件和信息技术服务业	广东省	440000	深圳市	440300
555	2016	0.164902	16.4902	1	4.69135	0.0145369	44.32	0	0	6.9939	0.0565	1	0.417108	0	0	I65	软件和信息技术服务业	广东省	440000	深圳市	440300
555	2017	0.158799	15.8799	1	4.62497	0.0130553	38.71	0	0	5.85	0.0587	1	0.05955	0	0	I65	软件和信息技术服务业	广东省	440000	深圳市	440300
555	2018	0.16431	16.431	1	4.97673	0.0142922	42.12	0	0	5.4	0.0498	1	0.013718	0	0	I65	软件和信息技术服务业	广东省	440000	深圳市	440300
555	2019	0.166975	16.6975	1	5.03695	0.009972	38.28	0	0	4.79	0.0456	1	0.059446	0.693147	0	I65	软件和信息技术服务业	广东省	440000	深圳市	440300
555	2020	0.154232	15.4232	1	5.03695	0.0109161	30.72	0	0	3.82	0.0376	1	0.068305	0	0	I65	软件和信息技术服务业	广东省	440000	深圳市	440300
555	2021	0.154168	15.4168	1	5.03695	0.0117706	30.54	0	0	3.98	0.0334	1	0.059847	0	0	I65	软件和信息技术服务业	广东省	440000	深圳市	440300
555	2022	0.158191	15.8191	1	4.96981	0.0124416	29.49	0	0	3.67	0.0318	1	0.017897	0.693147	0	I65	软件和信息技术服务业	广东省	440000	深圳市	440300
555	2023	0.0885459	8.85459	1	5.00395	0.013767	30.32	0	0	3.56	0.0321	0	0.032997	0.693147	0	I65	软件和信息技术服务业	广东省	440000	深圳市	440300
557	2016	0.0362322	3.62322	1	0	0.101282	0	0	0	2.58	0.6994	0	-0.019241	0	0	G53	铁路运输业	宁夏回族自治区	640000	银川市	640100
557	2017	0.0428577	4.28577	1	0.693147	0.0987307	0	0	0	2.25	0.689	0	0.022108	0	0	G53	铁路运输业	宁夏回族自治区	640000	银川市	640100
557	2018	0.0467093	4.67093	1	0.693147	0.0839765	0	0	0	1.88	0.5812	0	0.224944	1.09861	0	G53	铁路运输业	宁夏回族自治区	640000	银川市	640100
557	2019	0.0399391	3.99391	1	0.693147	0.0893148	0	0	0	1.85	0.64	0	0.009299	0	0	G53	铁路运输业	宁夏回族自治区	640000	银川市	640100
557	2020	0.0508514	5.08514	1	0.693147	0.0839017	0.99	0	0	1.87	0.6066	0	0.034686	1.38629	0	G53	铁路运输业	宁夏回族自治区	640000	银川市	640100
557	2021	0.0723846	7.23846	3	0.693147	0.0673573	2.79	0	0	2.34	0.5579	0	0.044575	1.38629	0	G53	铁路运输业	宁夏回族自治区	640000	银川市	640100
557	2022	0.0632254	6.32254	3	0	0.0617079	3.31	0	0	2.56	0.5093	0	0.042044	1.38629	0	G53	铁路运输业	宁夏回族自治区	640000	银川市	640100
557	2023	0.0792077	7.92077	5	0	0.0637868	3.39	0	0	2.56	0.4878	0	0.042718	0.693147	0	G53	铁路运输业	宁夏回族自治区	640000	银川市	640100
558	2011	0.0773411	7.73411	1	0	0.0002979	0	0	0	3.81	0.0601	1	0.138615	0	0	K70	房地产业	浙江省	330000	杭州市	330100
558	2012	0.0760505	7.60505	1	0	9.82e-05	0	0	0	3.23	0.0444	1	0.126606	0	0	K70	房地产业	浙江省	330000	杭州市	330100
558	2013	0.0762642	7.62642	1	0	3.07e-05	0	0	0	3.5587	0.0406	1	-0.140307	0	0	K70	房地产业	浙江省	330000	杭州市	330100
558	2014	0.0817656	8.17656	1	0	1.34e-05	0	0	0	2.6	0.0578	1	0.640428	0.693147	0	K70	房地产业	浙江省	330000	杭州市	330100
558	2015	0.10411	10.411	1	2.19722	1.26e-05	0	0	0	0	0.0931	1	-0.225293	0.693147	0	K70	房地产业	浙江省	330000	杭州市	330100
558	2016	0.106765	10.6765	1	2.3979	1.05e-05	0	0	0	0	0.1048	1	0.016509	0.693147	0	K70	房地产业	浙江省	330000	杭州市	330100
558	2017	0.0987552	9.87552	1	1.60944	0.0123622	0	0	0	0	0.1018	1	0.005291	0.693147	0	K70	房地产业	浙江省	330000	杭州市	330100
558	2018	0.0943548	9.43548	1	0	0.0481421	0	0	0	10.34	0.0844	1	-0.02496	0.693147	0	K70	房地产业	浙江省	330000	杭州市	330100
558	2019	0.111797	11.1797	1	2.07944	0.0251349	0	0	0	5.95	0.1122	1	-0.047974	0.693147	0	K70	房地产业	浙江省	330000	杭州市	330100
558	2020	0.120106	12.0106	2	1.60944	0.0274731	0	0	0	7.35	0.1231	1	-0.051297	0.693147	0	K70	房地产业	浙江省	330000	杭州市	330100
558	2021	0.111411	11.1411	3	0	0.0304133	0	0	0	6.67	0.2268	1	-0.084754	0	0	K70	房地产业	浙江省	330000	杭州市	330100
558	2022	0.109597	10.9597	3	0	0.0068071	0	0	0	4.26	0.1347	1	-0.034774	0.693147	0	K70	房地产业	浙江省	330000	杭州市	330100
558	2023	0.0391874	3.91874	3	0	0.0069876	0	0	0	4.26	0.2889	0	-0.230565	0	0	K70	房地产业	四川省	510000	成都市	510100
559	2011	0.0103622	1.22037	1	0	0.0157868	0	0	0	0	0.2399	0	0.020486	0	0	C36	汽车制造业	浙江省	330000	杭州市	330100
559	2012	0.0356516	3.56516	3	0	0.0225178	0	0	0	0.73	0.2788	0	-0.081008	0	0	C36	汽车制造业	浙江省	330000	杭州市	330100
559	2013	0.0351623	3.51623	3	0	0.0212179	0	0	0	0.771	0.2671	0	-0.15254	0	0	C36	汽车制造业	浙江省	330000	杭州市	330100
559	2014	0.0220899	2.20899	2	0	0.0154671	0	0	0	0.68	0.2321	0	0.134321	0	0	C36	汽车制造业	浙江省	330000	杭州市	330100
559	2015	0.0296988	2.96988	2	0	0.0143547	10.64	0	0	0.82	0.2271	0	0.050931	0	0	C36	汽车制造业	浙江省	330000	杭州市	330100
559	2016	0.0375682	3.75683	2	0	0.0167995	11.21	0	0	1.1122	0.2548	0	0.007498	0.693147	0	C36	汽车制造业	浙江省	330000	杭州市	330100
559	2017	0.0472651	4.72651	2	1.38629	0.0168464	11.29	0	0	1.19	0.2632	0	0.141504	0	0	C36	汽车制造业	浙江省	330000	杭州市	330100
559	2018	0.131333	13.1333	2	1.38629	0.0162106	10.23	0	0	1.92	0.2574	1	0.013033	1.60944	0	C36	汽车制造业	浙江省	330000	杭州市	330100
559	2019	0.147002	14.7002	3	1.94591	0.0127639	9.05	0	0	2.66	0.2676	1	-0.002638	1.38629	0	C36	汽车制造业	浙江省	330000	杭州市	330100
559	2020	0.146222	14.6222	3	2.19722	0.0114463	8.45	0	0	2.35	0.1996	1	0.623489	1.38629	0	C36	汽车制造业	浙江省	330000	杭州市	330100
559	2021	0.131379	13.1379	2	2.19722	0.0126084	8.78	0	0	2.17	0.169	1	-0.006856	1.09861	0	C36	汽车制造业	浙江省	330000	杭州市	330100
559	2022	0.177809	17.7809	2	1.60944	0.0117169	7.02	0.693147	2.43902	1.43	0.1399	1	0.015363	1.60944	3.73767	C36	汽车制造业	浙江省	330000	杭州市	330100
559	2023	0.0727925	7.27925	2	1.09861	0.010668	7.49	0	0	1.43	0.1208	0	0.01463	1.60944	3.29584	C36	汽车制造业	浙江省	330000	杭州市	330100
560	2011	0.0026967	1.22037	1	0	0.0011948	0	0	0	0	0.066	0	0.098493	0	0	F52	零售业	云南省	530000	昆明市	530100
560	2012	0.0103153	1.22037	1	0.693147	0.0012877	0	0	0	0	0.0675	0	0.090685	0	0	F52	零售业	云南省	530000	昆明市	530100
560	2013	0.0368687	3.68687	1	2.63906	0.0009217	0	0	0	0	0.054	0	0.095822	0.693147	0	F52	零售业	云南省	530000	昆明市	530100
560	2014	0.112532	11.2532	1	3.3673	0.0011869	0	0	0	0	0.131	1	0.037616	0	0	F52	零售业	云南省	530000	昆明市	530100
560	2015	0.117652	11.7652	1	4.11087	0.0009399	0	0	0	0	0.054	1	1.96161	0	0	F52	零售业	云南省	530000	昆明市	530100
560	2016	0.118907	11.8907	1	3.8712	0.077126	0	0	0	0	0.0437	1	0.008811	0	0	F52	零售业	云南省	530000	昆明市	530100
560	2017	0.112752	11.2752	1	3.3673	0.0780359	0	0	0	0	0.0247	1	1.11638	0	0	F52	零售业	云南省	530000	昆明市	530100
560	2018	0.10761	10.761	1	2.89037	0.0718364	0.7	0	0	0	0.0229	1	0.180628	0	0	K70	房地产业	云南省	530000	昆明市	530100
560	2019	0.116212	11.6212	1	3.66356	0.0727281	0.7	0	0	0.27	0.0183	1	0.090247	0	0	K70	房地产业	云南省	530000	昆明市	530100
560	2020	0.040517	4.0517	1	3.17805	0.0692437	1.23	0	0	0.33	0.0164	0	0.003332	0	0	K70	房地产业	云南省	530000	昆明市	530100
560	2021	0.0691237	6.91237	3	2.63906	0.0438352	1.36	0	0	0.2	0.0098	0	0.031501	1.60944	0	K70	房地产业	云南省	530000	昆明市	530100
560	2022	0.134339	13.4339	3	2.89037	0.0342155	1.46	0	0	0.38	0.0088	1	-0.029342	0.693147	0	K70	房地产业	云南省	530000	昆明市	530100
560	2023	0.066006	6.6006	3	2.56495	0.0369959	1.12	0	0	0.38	0.0085	0	-0.08026	1.38629	0	K70	房地产业	云南省	530000	昆明市	530100
561	2011	0.0224502	2.24502	1	0.693147	0.0397574	0	0	0	3.15	0.1039	0	0.145836	0	0.693147	C39	计算机、通信和其他电子设备制造业	陕西省	610000	宝鸡市	610300
561	2012	0.0393724	3.93724	1	1.79176	0.0335213	0	0	0	3.5	0.1035	0	0.031346	0	1.38629	C39	计算机、通信和其他电子设备制造业	陕西省	610000	宝鸡市	610300
561	2013	0.0377244	3.77244	1	0.693147	0.0399625	0	0	0	4.8099	0.0925	0	0.067878	0	2.63906	C39	计算机、通信和其他电子设备制造业	陕西省	610000	宝鸡市	610300
561	2014	0.0376676	3.76676	1	0	0.0334628	0	0	0	5.84	0.0777	0	0.047759	0.693147	2.83321	C39	计算机、通信和其他电子设备制造业	陕西省	610000	宝鸡市	610300
561	2015	0.0514414	5.14414	1	0	0.0271974	27.62	0	0	6.09	0.0603	0	0.08416	0	2.89037	C39	计算机、通信和其他电子设备制造业	陕西省	610000	宝鸡市	610300
561	2016	0.0552336	5.52336	1	0	0.0300779	30	0	0	6.1019	0.0805	0	0.111511	0	3.04452	C39	计算机、通信和其他电子设备制造业	陕西省	610000	宝鸡市	610300
561	2017	0.0967987	9.67987	1	0.693147	0.0358088	30.92	0.693147	4.54545	7.11	0.1146	0	0.119668	0	3.13549	C39	计算机、通信和其他电子设备制造业	陕西省	610000	宝鸡市	610300
561	2018	0.0641249	6.41249	1	0.693147	0.0329968	25.17	0	0	7.44	0.0961	0	0.072216	0	3.4012	C39	计算机、通信和其他电子设备制造业	陕西省	610000	宝鸡市	610300
561	2019	0.0625194	6.25194	1	0.693147	0.0305631	29	0	0	7.47	0.0761	0	0.080856	0.693147	2.07944	C39	计算机、通信和其他电子设备制造业	陕西省	610000	宝鸡市	610300
561	2020	0.151021	15.1021	1	0.693147	0.0272047	31	1.09861	25	7.45	0.0769	0	0.046093	0.693147	2.19722	C39	计算机、通信和其他电子设备制造业	陕西省	610000	宝鸡市	610300
561	2021	0.107155	10.7155	2	1.38629	0.0223656	29	0.693147	5.26316	0	0.1454	0	0.07704	0	2.99573	C39	计算机、通信和其他电子设备制造业	陕西省	610000	宝鸡市	610300
561	2022	0.139278	13.9278	2	0.693147	0.0193438	0.27	1.79176	17.2414	0	0.1444	0	0.052662	0	3.4012	C39	计算机、通信和其他电子设备制造业	陕西省	610000	宝鸡市	610300
561	2023	0.0965381	9.65381	2	0.693147	0.0180569	0.29	1.09861	7.14286	0	0.1348	0	0.050077	0	3.3673	C39	计算机、通信和其他电子设备制造业	陕西省	610000	宝鸡市	610300
564	2011	0.0084493	1.22037	1	0	0.0153425	0	0	0	0.53	0.1765	0	0.057553	0	0	F52	零售业	陕西省	610000	西安市	610100
564	2012	0.0340647	3.40647	1	1.60944	0.0092545	0	0	0	0.6	0.2378	0	1.18787	0.693147	0	F52	零售业	陕西省	610000	西安市	610100
564	2013	0.0387728	3.87728	1	1.94591	0.0117843	0	0	0	0.9387	0.2518	0	-0.148273	0.693147	0	F52	零售业	陕西省	610000	西安市	610100
564	2014	0.0367915	3.67915	1	1.79176	0.0185058	0	0	0	0.99	0.2328	0	0.030389	0.693147	0	F52	零售业	陕西省	610000	西安市	610100
564	2015	0.065038	6.5038	1	3.73767	0.0970059	0	0	0	0.47	0.3133	0	0.138925	0.693147	0	F52	零售业	陕西省	610000	西安市	610100
564	2016	0.051107	5.1107	1	4.11087	0.0353555	0	0	0	0.69	0.0865	0	2.48096	0	0	F52	零售业	陕西省	610000	西安市	610100
564	2017	0.161265	16.1265	4	4.21951	0.0223331	0	0	0	0	0.0935	1	0.021293	0.693147	0	F52	零售业	陕西省	610000	西安市	610100
564	2018	0.150821	15.0821	3	4.27667	0.020274	1.25	0	0	0	0.0787	1	0.017314	0.693147	0	F52	零售业	陕西省	610000	西安市	610100
564	2019	0.128214	12.8214	2	3.66356	0.0201977	3.08	0	0	0	0.0768	1	-0.050338	0	0	F52	零售业	陕西省	610000	西安市	610100
564	2020	0.126567	12.6567	2	3.43399	0.0201906	4.14	0	0	0	0.0791	1	-0.152259	0	0	F52	零售业	陕西省	610000	西安市	610100
565	2011	0.108644	10.8644	3	0	0.0571706	0	0	0	0	0.3114	1	-0.35204	0	0	C26	化学原料及化学制品制造业	重庆市	500000	重庆市	500000
565	2012	0.064002	6.4002	4	0	0.0232953	0	0	0	0	0.22	0	0.345755	1.79176	0.693147	C26	化学原料及化学制品制造业	重庆市	500000	重庆市	500000
565	2013	0.0505348	5.05348	2	0	0.0246536	0	0	0	0	0.2363	0	0.029282	2.19722	1.38629	C26	化学原料及化学制品制造业	重庆市	500000	重庆市	500000
565	2014	0.0401952	4.01952	2	0	0.0245078	0	0	0	0	0.2494	0	0.062149	2.07944	0	C26	化学原料及化学制品制造业	重庆市	500000	重庆市	500000
565	2015	0.0670873	6.70873	2	0.693147	0.0215132	13.51	0	0	0	0.2205	0	0.230768	2.19722	1.38629	C26	化学原料及化学制品制造业	重庆市	500000	重庆市	500000
565	2016	0.0643311	6.43311	2	0.693147	0.0167207	17.71	0	0	0	0.1823	0	0.26345	2.30259	0.693147	C26	化学原料及化学制品制造业	重庆市	500000	重庆市	500000
565	2017	0.0795072	7.95072	3	0.693147	0.0138415	17.65	0	0	0	0.1598	0	0.064296	2.89037	0.693147	C26	化学原料及化学制品制造业	重庆市	500000	重庆市	500000
565	2018	0.0791681	7.91681	3	0.693147	0.0144397	17.05	0	0	0	0.1497	0	0.031766	2.94444	0.693147	C26	化学原料及化学制品制造业	重庆市	500000	重庆市	500000
565	2019	0.0522339	5.22339	1	0	0.0134328	17.16	0	0	0	0.1348	0	0.050828	3.04452	1.09861	C26	化学原料及化学制品制造业	重庆市	500000	重庆市	500000
565	2020	0.064176	6.4176	2	0	0.0205495	15.41	0	0	0	0.1218	0	0.054762	3.04452	1.38629	C26	化学原料及化学制品制造业	重庆市	500000	重庆市	500000
565	2021	0.0531761	5.31761	1	0	0.0198224	15.12	0	0	0	0.1761	0	0.056909	3.43399	0.693147	C26	化学原料及化学制品制造业	重庆市	500000	重庆市	500000
565	2022	0.0622297	6.22297	2	0	0.0192914	14.37	0	0	0	0.1723	0	0.027963	3.2581	0.693147	C26	化学原料及化学制品制造业	重庆市	500000	重庆市	500000
565	2023	0.0602183	6.02183	2	0	0.0196674	15.83	0	0	0	0.1733	0	-0.045498	2.89037	0.693147	C26	化学原料及化学制品制造业	重庆市	500000	重庆市	500000
566	2011	0.0102054	1.22037	1	0	0.0813549	0	0	0	0	0.1399	0	1.65366	0	0	C27	医药制造业	海南省	460000	海口市	460100
566	2012	0.011186	1.22037	1	0	0.0795604	0	0	0	1.51	0.1248	0	0.11813	0	0	C27	医药制造业	海南省	460000	海口市	460100
566	2013	0.0175513	1.75513	1	0	0.0638894	0	0	0	2.1797	0.14	0	0.067153	0.693147	0	C27	医药制造业	海南省	460000	海口市	460100
566	2014	0.0260362	2.60362	1	0.693147	0.0612402	0	0	0	2.22	0.1663	0	0.087349	0.693147	0	C27	医药制造业	海南省	460000	海口市	460100
566	2015	0.113206	11.3206	1	1.79176	0.053061	4.74	0	0	0	0.1845	1	0.467527	1.09861	0	C27	医药制造业	海南省	460000	海口市	460100
566	2016	0.102803	10.2803	1	1.09861	0.0453954	2.95	0	0	1.72	0.1057	1	1.21955	1.09861	0	C27	医药制造业	海南省	460000	海口市	460100
566	2017	0.131955	13.1955	1	3.09104	0.0442599	5.36	0	0	4.64	0.1061	1	-0.098212	1.38629	0	C27	医药制造业	海南省	460000	海口市	460100
566	2018	0.124449	12.4449	1	2.48491	0.0431711	8.44	0	0	3.22	0.1314	1	-0.049583	1.09861	0	C27	医药制造业	海南省	460000	海口市	460100
566	2019	0.11438	11.438	1	1.60944	0.0442182	8.73	0	0	2.79	0.1236	1	-0.040369	1.09861	0	C27	医药制造业	海南省	460000	海口市	460100
566	2020	0.120202	12.0202	1	2.07944	0.0397239	8.2	0	0	1.75	0.1879	1	-0.142316	1.09861	0	C27	医药制造业	海南省	460000	海口市	460100
566	2021	0.116959	11.6959	1	1.60944	0.0547422	6.31	0	0	2.93	0.2148	1	-0.399533	1.09861	0	C27	医药制造业	海南省	460000	海口市	460100
566	2022	0.0315347	3.15347	1	0.693147	0.0468	5.18	0	0	2.71	0.2174	0	-0.019979	0.693147	0	C27	医药制造业	海南省	460000	海口市	460100
566	2023	0.0330652	3.30653	1	0.693147	0.0692897	6.3	0	0	2.71	0.2032	0	-0.058534	0.693147	0	C27	医药制造业	海南省	460000	海口市	460100
567	2011	0.0016941	1.22037	1	0	0	0	0	0	0	0.0423	0	0.006697	0	0	K70	房地产业	海南省	460000	海口市	460100
567	2012	0.0011178	1.22037	1	0	0	0	0	0	0	0.0277	0	-0.068576	0	0	K70	房地产业	海南省	460000	海口市	460100
567	2013	0.0885795	8.85795	2	0	0	0	0	0	0	0.0201	1	0.249235	0.693147	0	K70	房地产业	海南省	460000	海口市	460100
567	2014	0.0884311	8.84311	2	0	0	0	0	0	0	0.0165	1	0.021306	0.693147	0	K70	房地产业	海南省	460000	海口市	460100
567	2015	0.0182284	1.82284	2	0	0	0	0	0	0	0.0262	0	-0.080833	0.693147	0	K70	房地产业	海南省	460000	海口市	460100
567	2016	0.0459048	4.59048	2	0	0	0	0	0	25	0.0049	0	0.00239	0.693147	0	K70	房地产业	海南省	460000	海口市	460100
567	2017	0.0482675	4.82675	1	0	2.86e-05	0	0	0	42.22	0.0019	0	0.346636	0	0	K70	房地产业	海南省	460000	海口市	460100
568	2011	0.0865745	8.65745	2	0	0.0262315	0	0	0	0	0.0811	1	0.298882	0	0	C15	酒、饮料和精制茶制造业	四川省	510000	泸州市	510500
568	2012	0.121762	12.1762	3	1.09861	0.018056	0	0	0	4.62	0.0641	1	0.352398	0	1.09861	C15	酒、饮料和精制茶制造业	四川省	510000	泸州市	510500
568	2013	0.113072	11.3072	3	0	0.0189105	0	0	0	5.0931	0.0809	1	0.088689	0	1.38629	C15	酒、饮料和精制茶制造业	四川省	510000	泸州市	510500
568	2014	0.172261	17.2261	3	2.99573	0.0190923	0	0	0	8.49	0.0825	1	-0.079859	0.693147	3.73767	C15	酒、饮料和精制茶制造业	四川省	510000	泸州市	510500
568	2015	0.167649	16.7649	3	2.19722	0.0184784	17.69	0	0	5.12	0.0842	1	0.058103	0.693147	3.04452	C15	酒、饮料和精制茶制造业	四川省	510000	泸州市	510500
568	2016	0.144661	14.4661	2	2.3979	0.0172061	20.76	0	0	6.47	0.0862	1	0.073614	0	1.38629	C15	酒、饮料和精制茶制造业	四川省	510000	泸州市	510500
568	2017	0.17251	17.251	3	2.70805	0.0116948	18.32	0	0	7.35	0.0572	1	0.379023	0	3.55535	C15	酒、饮料和精制茶制造业	四川省	510000	泸州市	510500
568	2018	0.184313	18.4313	3	3.09104	0.0102618	15.69	0	0	7.32	0.0456	1	0.118309	1.09861	3.66356	C15	酒、饮料和精制茶制造业	四川省	510000	泸州市	510500
568	2019	0.183292	18.3292	3	2.99573	0.011488	14.06	0	0	8.4	0.0525	1	0.141935	1.09861	3.61092	C15	酒、饮料和精制茶制造业	四川省	510000	泸州市	510500
568	2020	0.181959	18.1959	3	2.77259	0.0758977	14.23	0	0	9.1	0.1967	1	0.185487	0	3.63759	C15	酒、饮料和精制茶制造业	四川省	510000	泸州市	510500
568	2021	0.167127	16.7127	2	2.89037	0.0603159	14.39	0	0	9.55	0.1872	1	0.213761	0	3.04452	C15	酒、饮料和精制茶制造业	四川省	510000	泸州市	510500
568	2022	0.203737	20.3737	3	1.94591	0.0600028	13.31	0.693147	3.0303	10.55	0.1723	1	0.220047	0.693147	3.52636	C15	酒、饮料和精制茶制造业	四川省	510000	泸州市	510500
568	2023	0.128841	12.8841	3	2.30259	0.0536836	12.55	0.693147	3.44828	10.55	0.1361	0	0.209821	0	3.4012	C15	酒、饮料和精制茶制造业	四川省	510000	泸州市	510500
570	2011	0.0219603	2.19603	1	0	0.030775	0	0	0	0.43	0.1494	0	-0.159988	0	1.94591	C34	通用设备制造业	江苏省	320000	常州市	320400
570	2012	0.0190904	1.90904	1	0	0.0276156	0	0	0	0.44	0.1816	0	0.059737	0	1.38629	C34	通用设备制造业	江苏省	320000	常州市	320400
570	2013	0.0228388	2.28388	1	0	0.0276819	0	0	0	0.4419	0.2036	0	-0.018953	0	1.79176	C34	通用设备制造业	江苏省	320000	常州市	320400
570	2014	0.034777	3.4777	1	0	0.0329802	0	0	0	0.55	0.1809	0	0.069596	0.693147	2.70805	C34	通用设备制造业	江苏省	320000	常州市	320400
570	2015	0.0367549	3.67549	1	0	0.0318962	10.76	0	0	0.59	0.1716	0	0.034485	0	2.77259	C34	通用设备制造业	江苏省	320000	常州市	320400
570	2016	0.0472558	4.72558	1	0	0.0268239	10.55	0	0	0	0.1486	0	0.159356	1.09861	3.21888	C34	通用设备制造业	江苏省	320000	常州市	320400
570	2017	0.0424595	4.24595	1	0	0.0289256	10.87	0	0	0	0.1504	0	-0.031965	1.09861	2.48491	C34	通用设备制造业	江苏省	320000	常州市	320400
570	2018	0.0457318	4.57318	1	0	0.0290724	11.55	0	0	0	0.1442	0	-0.089051	1.79176	2.07944	C34	通用设备制造业	江苏省	320000	常州市	320400
570	2019	0.0614759	6.14759	2	0	0.0285768	11.96	0	0	0	0.1312	0	0.03277	2.07944	2.3979	C34	通用设备制造业	江苏省	320000	常州市	320400
570	2020	0.107582	10.7582	2	0.693147	0.0401904	12.36	0.693147	8.33333	0	0.1149	0	0.076187	1.94591	2.56495	C34	通用设备制造业	江苏省	320000	常州市	320400
570	2021	0.069763	6.9763	1	1.94591	0.0319223	9.55	0	0	0	0.0829	0	0.350711	1.79176	2.99573	C34	通用设备制造业	江苏省	320000	常州市	320400
570	2022	0.114353	11.4353	2	2.19722	0.0301555	8.89	0.693147	4	0	0.138	0	0.084018	1.60944	3.2581	C34	通用设备制造业	江苏省	320000	常州市	320400
570	2023	0.0990994	9.90995	1	1.79176	0.0287743	8.74	0.693147	5.26316	0	0.1309	0	0.033627	1.60944	2.99573	C34	通用设备制造业	江苏省	320000	常州市	320400
571	2011	0.026979	2.6979	1	0	0.0868246	0	0	0	0.19	0.3168	0	-0.21191	1.09861	0	C37	铁路、船舶、航空航天和其它运输设备制造业	海南省	460000	海口市	460100
571	2012	0.0180858	1.80858	1	0	0.0882491	0	0	0	0.29	0.1728	0	0.576736	0.693147	0	B06	煤炭开采和洗选业	海南省	460000	海口市	460100
571	2013	0.0376533	3.76533	2	0	0.0779307	0	0	0	0.4027	0.1581	0	0.050761	1.79176	0	B06	煤炭开采和洗选业	海南省	460000	海口市	460100
571	2014	0.0365191	3.65191	2	0	0.0692685	0	0	0	0.59	0.1362	0	0.243583	1.79176	0	B06	煤炭开采和洗选业	海南省	460000	海口市	460100
571	2015	0.0341983	3.41983	2	0	0.0627997	0	0	0	0.34	0.1334	0	0.009554	1.60944	0	B06	煤炭开采和洗选业	海南省	460000	海口市	460100
571	2016	0.0960365	9.60365	1	0	0.0607704	0	0	0	0.24	0.3141	1	0.005897	1.09861	0	B06	煤炭开采和洗选业	海南省	460000	海口市	460100
571	2017	0.0756561	7.56561	1	0	0.0791177	0	0	0	0.48	0	1	-0.002026	0	0	S90	综合	海南省	460000	海口市	460100
571	2018	0.0302773	3.02773	1	2.30259	0.0817695	0	0	0	0.45	0	0	-0.34756	0	0	S90	综合	海南省	460000	海口市	460100
571	2023	0.0638204	6.38204	1	2.56495	0.108627	0	0	0	0.38	0.395	0	0.104941	1.60944	0	S90	综合	海南省	460000	海口市	460100
572	2011	0.0129854	1.29854	1	0	0.0749222	0	0	0	0.9	0.195	0	0.059041	0	0	C36	汽车制造业	海南省	460000	海口市	460100
572	2012	0.0154998	1.54998	1	0	0.084709	0	0	0	1.3	0.2332	0	0.050896	0	0	C36	汽车制造业	海南省	460000	海口市	460100
572	2013	0.0224487	2.24487	1	0	0.0964713	0	0	0	1.433	0.2391	0	0.064169	0.693147	0	C36	汽车制造业	海南省	460000	海口市	460100
572	2014	0.0232564	2.32564	1	0.693147	0.0973353	0	0	0	1.8	0.2056	0	0.029451	0	0	C36	汽车制造业	海南省	460000	海口市	460100
572	2015	0.0624093	6.24093	1	2.07944	0.0890428	21.11	0	0	2.59	0.1794	0	-0.001007	1.09861	0	C36	汽车制造业	海南省	460000	海口市	460100
572	2016	0.0433329	4.33329	1	1.38629	0.0868421	17.23	0	0	3.5365	0.1713	0	-0.007177	0	0	C36	汽车制造业	海南省	460000	海口市	460100
572	2017	0.0532744	5.32744	1	2.07944	0.089029	19.72	0	0	4.3	0.1609	0	-0.142409	0	0	C36	汽车制造业	海南省	460000	海口市	460100
572	2018	0.0722923	7.22923	1	2.07944	0.100565	22.5	0	0	4.65	0.2667	0	-0.301288	1.38629	0	C36	汽车制造业	海南省	460000	海口市	460100
572	2021	0.0622642	6.22642	1	2.30259	0.143693	5.04	0	0	2.49	0.2717	0	0.026011	1.38629	0	C36	汽车制造业	海南省	460000	海口市	460100
572	2022	0.0621925	6.21925	1	1.38629	0.140652	18.98	0	0	2.1	0.2829	0	-0.346388	1.38629	0	C36	汽车制造业	海南省	460000	海口市	460100
572	2023	0.0554468	5.54468	1	1.09861	0.103236	16.72	0	0	1.49	0.2166	0	-0.067438	1.79176	0	C36	汽车制造业	海南省	460000	海口市	460100
573	2011	0.0056093	1.22037	1	0	0.081176	0	0	0	0	0.0245	0	0.03861	0	0	K70	房地产业	广东省	440000	东莞市	441900
573	2012	0.0060204	1.22037	1	0	0.07604	0	0	0	0	0.0424	0	0.012386	0	0	K70	房地产业	广东省	440000	东莞市	441900
573	2013	0.0043714	1.22037	1	0	0.0530862	0	0	0	0	0.0336	0	0.072476	0	0	K70	房地产业	广东省	440000	东莞市	441900
573	2014	0.0100345	1.22037	1	0	0.0524798	0	0	0	0	0.0286	0	0.003933	0.693147	0	K70	房地产业	广东省	440000	东莞市	441900
573	2015	0.0160239	1.60239	1	1.09861	0.0531721	0	0	0	0	0.0254	0	-0.054952	0	0	K70	房地产业	广东省	440000	东莞市	441900
573	2016	0.0042454	1.22037	1	0	0.0599032	0	0	0	0	0.0205	0	0.126466	0	0	K70	房地产业	广东省	440000	东莞市	441900
573	2017	0.0295353	2.95353	1	1.38629	0.0594455	0	0	0	0	0.0425	0	-0.00095	1.09861	0	K70	房地产业	广东省	440000	东莞市	441900
573	2018	0.0383087	3.83087	1	1.38629	0.0490412	0	0	0	0	0.043	0	-0.006186	2.19722	0	K70	房地产业	广东省	440000	东莞市	441900
573	2019	0.04495	4.495	1	1.94591	0.0565601	0	0	0	0	0.0459	0	0.013924	2.19722	0	K70	房地产业	广东省	440000	东莞市	441900
573	2020	0.0379349	3.79349	1	1.38629	0.0533376	2.35	0	0	0	0.0384	0	-0.089667	1.94591	0	K70	房地产业	广东省	440000	东莞市	441900
573	2021	0.0581237	5.81237	3	1.38629	0.0591889	2.78	0	0	0	0.0347	0	0.062913	1.60944	0	K70	房地产业	广东省	440000	东莞市	441900
573	2022	0.0643147	6.43147	3	1.38629	0.0791184	3.01	0	0	0	0.032	0	-0.017661	2.19722	0	K70	房地产业	广东省	440000	东莞市	441900
573	2023	0.060016	6.0016	3	1.38629	0.0309896	2.56	0	0	0	0.026	0	0.019919	2.07944	0	K70	房地产业	广东省	440000	东莞市	441900
576	2013	0.0923647	9.23647	1	0	0.0608282	0	0	0	0	0.0742	1	4.58084	1.79176	0	C22	造纸及纸制品业	广东省	440000	江门市	440700
576	2014	0.0970631	9.70631	1	0	0.0617186	0	0	0	0	0.4335	1	0.009879	0.693147	0	C22	造纸及纸制品业	广东省	440000	江门市	440700
576	2015	0.108377	10.8377	1	0.693147	0.0599282	10.86	0	0	0	0.3314	1	0.17246	0.693147	0	C22	造纸及纸制品业	广东省	440000	江门市	440700
576	2016	0.122099	12.2099	1	0.693147	0.0636074	10.79	0	0	0	0.4054	1	0.084944	1.94591	0	C22	造纸及纸制品业	广东省	440000	江门市	440700
576	2017	0.108837	10.8837	1	0	0.0802146	11.5	0	0	0	0.2234	1	-0.216285	1.94591	0	C22	造纸及纸制品业	广东省	440000	江门市	440700
576	2018	0.0322341	3.22341	1	0	0.020477	27.66	0	0	0	0.0418	0	0.118249	1.09861	0	C22	造纸及纸制品业	广东省	440000	江门市	440700
576	2019	0.0355539	3.55539	1	0	0.0174816	29.31	0	0	0	0.038	0	-0.000244	1.38629	0	C22	造纸及纸制品业	广东省	440000	江门市	440700
576	2020	0.0340682	3.40682	1	0	0.0069231	32.61	0	0	0	0.0165	0	0.51556	1.09861	0	C35	专用设备制造业	广东省	440000	江门市	440700
576	2021	0.0375807	3.75807	1	0	0.0044358	37.42	0	0	0	0.0212	0	-0.060987	1.09861	0	C35	专用设备制造业	广东省	440000	江门市	440700
576	2022	0.0435704	4.35704	1	0	0.0054577	37.05	0	0	0	0.0288	0	0.097056	1.79176	0	C35	专用设备制造业	广东省	440000	江门市	440700
576	2023	0.0415559	4.15559	2	0	0.0054873	39.43	0	0	0	0.0347	0	-0.087653	0	0	C35	专用设备制造业	广东省	440000	江门市	440700
581	2011	0.100767	10.0767	1	0	0.031519	0	0	0	1.78	0.1712	1	0.228857	1.38629	1.09861	C34	通用设备制造业	江苏省	320000	无锡市	320200
581	2012	0.124004	12.4004	4	0	0.0253533	0	0	0	2.01	0.1271	1	0.677965	0.693147	0.693147	C36	汽车制造业	江苏省	320000	无锡市	320200
581	2013	0.117624	11.7624	3	0	0.0275569	0	0	0	2.393	0.1125	1	0.115687	0.693147	1.38629	C36	汽车制造业	江苏省	320000	无锡市	320200
581	2014	0.112864	11.2864	2	0.693147	0.0251138	0	0	0	3.56	0.0932	1	0.126575	1.09861	0.693147	C36	汽车制造业	江苏省	320000	无锡市	320200
581	2015	0.157816	15.7816	3	1.09861	0.0229629	19.81	0	0	4.2	0.1478	1	0.084361	1.60944	1.79176	C36	汽车制造业	江苏省	320000	无锡市	320200
581	2016	0.199893	19.9893	4	0	0.0201119	20.79	0.693147	12.5	4.2418	0.1418	1	0.097038	0.693147	2.19722	C36	汽车制造业	江苏省	320000	无锡市	320200
581	2017	0.289303	28.9303	4	1.94591	0.0168371	20.92	1.60944	26.6667	3.86	0.1278	1	0.145759	1.60944	2.77259	C36	汽车制造业	江苏省	320000	无锡市	320200
581	2018	0.271968	27.1968	4	2.63906	0.015551	20.08	1.79176	11.6279	4.42	0.1296	1	0.071694	1.09861	3.78419	C36	汽车制造业	江苏省	320000	无锡市	320200
581	2019	0.243079	24.3079	4	2.94444	0.0179726	18.75	1.09861	8	4.98	0.1188	1	0.06277	1.09861	3.2581	C36	汽车制造业	江苏省	320000	无锡市	320200
581	2020	0.292358	29.2358	3	2.83321	0.0166143	20.3	1.94591	23.0769	5.96	0.1054	1	0.074912	1.38629	3.29584	C36	汽车制造业	江苏省	320000	无锡市	320200
581	2021	0.276786	27.6786	2	2.3979	0.0157519	20.82	2.30259	14.7541	6.27	0.1048	1	0.062159	1.60944	4.12713	C36	汽车制造业	江苏省	320000	无锡市	320200
581	2022	0.277261	27.7261	2	2.30259	0.0170924	20.92	2.3979	9.52381	8.34	0.1321	1	-0.076542	1.94591	4.66344	C36	汽车制造业	江苏省	320000	无锡市	320200
581	2023	0.204965	20.4965	2	2.63906	0.0172655	21.84	1.94591	15.7895	9.41	0.1414	0	0.094578	1.79176	3.66356	C36	汽车制造业	江苏省	320000	无锡市	320200
582	2011	0.0326726	3.26726	1	0	0.127543	0	0	0	0	0.4957	0	0.117237	0.693147	0	G58	装卸搬运和运输代理业	广西壮族自治区	450000	北海市	450500
582	2012	0.0249695	2.49695	1	0	0.0773277	0	0	0	0	0.3724	0	0.110947	0.693147	0	G55	水上运输业	广西壮族自治区	450000	北海市	450500
582	2013	0.041856	4.1856	1	0.693147	0.121186	0	0	0	0	0.6962	0	0.180457	0	0	G55	水上运输业	广西壮族自治区	450000	北海市	450500
582	2014	0.0350396	3.50396	1	0	0.12137	0	0	0	0	0.7149	0	-0.075063	0	0	G55	水上运输业	广西壮族自治区	450000	北海市	450500
582	2015	0.0395529	3.95529	1	0.693147	0.124796	0	0	0	0	0.6321	0	0.593674	0	0	G55	水上运输业	广西壮族自治区	450000	北海市	450500
582	2016	0.0694675	6.94675	1	2.56495	0.122918	0	0	0	0	0.6395	0	0.062285	1.09861	0	G55	水上运输业	广西壮族自治区	450000	北海市	450500
582	2017	0.064905	6.4905	1	2.07944	0.143283	0	0	0	0	0.6286	0	0.067532	1.09861	0	G55	水上运输业	广西壮族自治区	450000	北海市	450500
582	2018	0.0809528	8.09528	2	2.3979	0.136692	0	0	0	0	0.6089	0	0.243497	1.38629	0	G55	水上运输业	广西壮族自治区	450000	北海市	450500
582	2019	0.0782208	7.82208	1	2.07944	0.150846	1.4	0	0	0	0.6554	0	0.013211	1.79176	0.693147	G55	水上运输业	广西壮族自治区	450000	北海市	450500
582	2020	0.0696886	6.96886	1	2.19722	0.11773	2.68	0	0	0	0.5946	0	0.122912	1.60944	0	G55	水上运输业	广西壮族自治区	450000	北海市	450500
582	2021	0.147965	14.7965	2	2.30259	0.0902875	3.32	0	0	0	0.4629	1	0.037071	1.79176	0	G55	水上运输业	广西壮族自治区	450000	北海市	450500
582	2022	0.149817	14.9817	3	2.56495	0.0828448	2.32	0	0	0	0.5673	1	0.130605	0	0	G55	水上运输业	广西壮族自治区	450000	北海市	450500
582	2023	0.0908056	9.08056	3	2.3979	0.083394	4.32	0	0	0	0.6326	0	-0.001815	1.09861	0	G55	水上运输业	广西壮族自治区	450000	北海市	450500
584	2011	0.0963159	9.63159	1	0	0.0089343	0	0	0	0	0.4031	1	-0.006197	1.09861	0	C28	化学纤维制造业	四川省	510000	成都市	510100
584	2012	0.0854542	8.54542	1	0	0.008621	0	0	0	0	0.365	1	-0.016878	0	0	C28	化学纤维制造业	四川省	510000	成都市	510100
584	2013	0.0845165	8.45165	1	0	0.0086006	0	0	0	0	0.341	1	0.224759	0	0	C28	化学纤维制造业	四川省	510000	成都市	510100
584	2014	0.0922971	9.22971	1	0	0.0130524	0	0	0	0	0.295	1	-0.072408	1.09861	0	C28	化学纤维制造业	江苏省	320000	江阴市	320281
584	2015	0.0822863	8.22863	1	0	0.0081573	0	0	0	0	0.2851	1	-0.003214	0	0	C28	化学纤维制造业	江苏省	320000	江阴市	320281
584	2016	0.122104	12.2104	1	3.46574	0.0103947	0	0	0	0	0.1841	1	-0.243313	0.693147	0	C28	化学纤维制造业	江苏省	320000	江阴市	320281
584	2017	0.152395	15.2395	1	5.03695	0.0192618	25.56	0	0	2.61	0.109	1	0.07148	0	0	C28	化学纤维制造业	江苏省	320000	江阴市	320281
584	2018	0.184016	18.4016	1	5.03695	0.0182705	40.44	0	0	3.5	0.0254	1	0.067643	1.09861	1.94591	C28	化学纤维制造业	江苏省	320000	江阴市	320281
584	2019	0.18886	18.886	1	5.03695	0.0275455	41.07	0	0	4.15	0.0231	1	0.036616	1.09861	2.3979	C35	专用设备制造业	江苏省	320000	江阴市	320281
584	2020	0.181645	18.1645	1	5.03695	0.0247222	41.35	0	0	2.92	0.0192	1	0.36702	0.693147	2.07944	C35	专用设备制造业	江苏省	320000	江阴市	320281
584	2021	0.175446	17.5446	1	5.03695	0.0331996	51.02	0	0	3.44	0.032	1	-0.232919	0.693147	0	C35	专用设备制造业	江苏省	320000	江阴市	320281
584	2022	0.138813	13.8813	1	5.03695	0.0287272	0	0	0	2.75	0.0674	1	-0.429518	0.693147	0	C35	专用设备制造业	江苏省	320000	江阴市	320281
586	2011	0.0161052	1.61052	1	0.693147	0.0497031	0	0	0	1.47	0.1021	0	0.119269	0	0	I63	电信、广播电视和卫星传输服务	四川省	510000	成都市	510100
586	2012	0.0212406	2.12406	1	0.693147	0.0479741	0	0	0	1.26	0.0914	0	0.043013	0.693147	0	C39	计算机、通信和其他电子设备制造业	四川省	510000	成都市	510100
586	2013	0.0128282	1.28282	1	0	0.0417378	0	0	0	1.0598	0.0844	0	0.054573	0.693147	0	C39	计算机、通信和其他电子设备制造业	四川省	510000	成都市	510100
586	2014	0.0249542	2.49542	1	1.09861	0.0380661	0	0	0	1.88	0.0698	0	0.039586	0.693147	0	C39	计算机、通信和其他电子设备制造业	四川省	510000	成都市	510100
586	2015	0.0386431	3.8643	1	1.79176	0.0396947	9.48	0	0	1.3	0.0655	0	0.086017	0.693147	0	C39	计算机、通信和其他电子设备制造业	四川省	510000	成都市	510100
586	2016	0.109124	10.9124	1	1.79176	0.036678	9.75	0	0	1.4	0.0595	1	0.019269	0.693147	0	C39	计算机、通信和其他电子设备制造业	四川省	510000	成都市	510100
586	2017	0.107468	10.7468	1	2.19722	0.0359901	9.24	0	0	1.37	0.0662	1	0.0071	0	0	C39	计算机、通信和其他电子设备制造业	四川省	510000	成都市	510100
586	2018	0.123719	12.3719	1	2.70805	0.0371033	13.12	0	0	2.74	0.0751	1	-0.005823	0.693147	0	C39	计算机、通信和其他电子设备制造业	四川省	510000	成都市	510100
586	2019	0.132589	13.2589	1	3.09104	0.0356108	20.08	0	0	2.56	0.0736	1	0.027938	0.693147	0	C39	计算机、通信和其他电子设备制造业	四川省	510000	成都市	510100
586	2020	0.124013	12.4013	1	1.94591	0.0349782	21.89	0	0	4.31	0.0897	1	0.017368	0.693147	0	C39	计算机、通信和其他电子设备制造业	四川省	510000	成都市	510100
586	2021	0.116601	11.6601	2	0	0.032013	23.36	0	0	5.24	0.104	1	0.102799	0.693147	0	C39	计算机、通信和其他电子设备制造业	四川省	510000	成都市	510100
586	2022	0.126726	12.6727	2	1.09861	0.02829	23.04	0	0	4.02	0.1037	1	0.063803	0.693147	0	C39	计算机、通信和其他电子设备制造业	四川省	510000	成都市	510100
586	2023	0.0557564	5.57564	2	0.693147	0.0260745	26.07	0	0	5.98	0.0967	0	0.064449	0.693147	0	C39	计算机、通信和其他电子设备制造业	四川省	510000	成都市	510100
589	2011	0.05048	5.048	2	0	0.0189489	0	0	0	0	0.2574	0	0.335363	1.79176	1.79176	C29	橡胶和塑料制品业	贵州省	520000	贵阳市	520100
589	2012	0.0472615	4.72615	2	0	0.0280709	0	0	0	0.39	0.3157	0	0.044841	0.693147	2.19722	C29	橡胶和塑料制品业	贵州省	520000	贵阳市	520100
589	2013	0.0332199	3.32199	1	0	0.0439269	0	0	0	0.3856	0.2679	0	0.061826	0.693147	1.94591	C29	橡胶和塑料制品业	贵州省	520000	贵阳市	520100
589	2015	0.0364684	3.64684	1	0	0.0287402	11.62	0	0	0.49	0.3084	0	-0.076622	0.693147	1.09861	C29	橡胶和塑料制品业	贵州省	520000	贵阳市	520100
589	2016	0.0517024	5.17024	1	0	0.0289223	10.47	0	0	0.58	0.3626	0	0.026944	0.693147	3.04452	C29	橡胶和塑料制品业	贵州省	520000	贵阳市	520100
589	2017	0.0672093	6.72093	1	1.09861	0.0303244	10.19	0	0	0.61	0.3822	0	-0.066917	1.94591	1.94591	C29	橡胶和塑料制品业	贵州省	520000	贵阳市	520100
589	2018	0.0652769	6.52769	1	1.09861	0.0276323	10.56	0	0	0.6	0.3637	0	0.022665	1.79176	1.94591	C29	橡胶和塑料制品业	贵州省	520000	贵阳市	520100
589	2019	0.0714045	7.14045	1	1.09861	0.0212584	12.67	0	0	0.61	0.3141	0	0.090282	1.60944	3.13549	C29	橡胶和塑料制品业	贵州省	520000	贵阳市	520100
589	2020	0.0788268	7.88268	1	1.60944	0.0206103	11.41	0	0	0.75	0.3267	0	0.311133	1.79176	3.21888	C29	橡胶和塑料制品业	贵州省	520000	贵阳市	520100
589	2021	0.126061	12.6061	3	1.09861	0.0283955	11.01	0.693147	3.0303	0.8422	0.3587	0	0.216878	1.79176	3.52636	C29	橡胶和塑料制品业	贵州省	520000	贵阳市	520100
589	2022	0.120331	12.0331	3	0.693147	0.0262832	10.48	0.693147	3.125	0.8	0.3396	0	0.091033	1.79176	3.49651	C29	橡胶和塑料制品业	贵州省	520000	贵阳市	520100
589	2023	0.0946813	9.46813	3	0.693147	0.024023	9.72	0	0	0.77	0.3505	0	0.102277	1.60944	3.91202	C29	橡胶和塑料制品业	贵州省	520000	贵阳市	520100
590	2011	0.104684	10.4684	1	0	0.222654	0	0	0	0.49	0.2798	1	0.295505	0	1.38629	C27	医药制造业	湖南省	430000	衡阳市	430400
590	2012	0.100719	10.0719	1	0	0.186945	0	0	0	0.41	0.2329	1	0.324641	0	1.38629	C27	医药制造业	湖南省	430000	衡阳市	430400
590	2013	0.0946863	9.46863	1	0	0.264133	0	0	0	0.3224	0.2214	1	-0.436855	0	0	C27	医药制造业	湖南省	430000	衡阳市	430400
590	2014	0.0954541	9.54541	1	0	0.266032	0	0	0	0.36	0.237	1	-0.316887	0	0	C27	医药制造业	湖南省	430000	衡阳市	430400
590	2016	0.117588	11.7588	1	0.693147	0.27185	3.8	0	0	0.7726	0.2262	1	0.282621	0	1.60944	C27	医药制造业	湖南省	430000	衡阳市	430400
590	2017	0.105654	10.5654	1	0.693147	0.19213	4.5	0	0	0.95	0.1847	1	1.20996	0	0.693147	C27	医药制造业	湖南省	430000	衡阳市	430400
590	2018	0.111281	11.128	1	0.693147	0.168512	4.5	0	0	1	0.1867	1	-0.006193	1.38629	0	C27	医药制造业	湖南省	430000	衡阳市	430400
590	2019	0.11229	11.229	1	0.693147	0.159082	4.87	0	0	1.05	0.1694	1	0.073212	1.60944	0	C27	医药制造业	湖南省	430000	衡阳市	430400
590	2020	0.0431092	4.31092	1	1.09861	0.154862	4.78	0	0	0.56	0.1629	0	0.036522	1.38629	0	C27	医药制造业	湖南省	430000	衡阳市	430400
590	2021	0.0508233	5.08233	1	1.60944	0.138139	4.53	0	0	0.91	0.2361	0	0.058054	1.38629	0	C27	医药制造业	湖南省	430000	衡阳市	430400
590	2022	0.0429619	4.29619	1	1.09861	0.134938	5.5	0	0	0.84	0.2288	0	0.029565	1.09861	0	C27	医药制造业	湖南省	430000	衡阳市	430400
590	2023	0.0385783	3.85783	1	0.693147	0.114955	6.6	0	0	1.13	0.2299	0	0.036593	1.09861	0	C27	医药制造业	湖南省	430000	衡阳市	430400
591	2011	0.191711	19.1711	1	0.693147	0.0389459	0	1.94591	46.1538	0	0.1533	0	-0.034022	0	2.63906	F52	零售业	重庆市	500000	重庆市	500000
591	2012	0.194888	19.4888	1	0	0.0551177	0	1.60944	57.1429	0	0.1366	0	0.037706	0	2.07944	F52	零售业	重庆市	500000	重庆市	500000
591	2013	0.307341	30.7341	1	2.19722	0.0506474	0	2.89037	77.2727	0	0.1444	0	0.052621	0	3.13549	F52	零售业	重庆市	500000	重庆市	500000
591	2014	0.225214	22.5214	1	2.19722	0.0466313	0	1.94591	54.5455	0	0.1371	0	-0.147644	0	2.48491	F52	零售业	重庆市	500000	重庆市	500000
591	2015	0.275594	27.5594	1	1.38629	0.0171034	12.7	1.79176	55.5556	3.15	0.5636	0	0.081387	4.09434	2.30259	F52	零售业	重庆市	500000	重庆市	500000
591	2016	0.387678	36.9914	2	0	0.0133509	11.9	3.04452	55.5556	2.952	0.5834	1	0.852691	4.12713	3.61092	D44	电力、热力生产和供应业	重庆市	500000	重庆市	500000
591	2017	0.438644	36.9914	2	2.19722	0.0126623	20.3	3.21888	61.5385	2.62	0.6349	1	0.063194	4.20469	3.68888	D44	电力、热力生产和供应业	重庆市	500000	重庆市	500000
591	2018	0.470981	36.9914	2	1.79176	0.0114124	24	3.29584	76.4706	3.8	0.6716	1	0.051035	3.89182	3.55535	D44	电力、热力生产和供应业	重庆市	500000	重庆市	500000
591	2019	0.445907	36.9914	2	2.07944	0.0141553	22.26	2.99573	67.8571	3.95	0.6828	1	0.046013	4.02535	3.3673	D44	电力、热力生产和供应业	重庆市	500000	重庆市	500000
591	2020	0.428908	36.9914	2	1.60944	0.0132389	22.8	2.07944	77.7778	3.66	0.6738	1	0.051855	4.09434	2.30259	D44	电力、热力生产和供应业	重庆市	500000	重庆市	500000
591	2021	0.382587	36.9914	2	2.48491	0.0132285	24.15	2.70805	73.6842	4.36	0.6263	0	0.052426	4.18966	2.99573	D44	电力、热力生产和供应业	重庆市	500000	重庆市	500000
591	2022	0.362143	36.2143	2	2.48491	0.0110216	21.37	1.79176	83.3333	4.19	0.5178	0	0.464072	4.04305	1.94591	D44	电力、热力生产和供应业	重庆市	500000	重庆市	500000
591	2023	0.362584	36.2584	2	2.89037	0.0107683	20.9	0.693147	100	4.42	0.5072	0	0.052906	4.09434	0.693147	D44	电力、热力生产和供应业	重庆市	500000	重庆市	500000
592	2011	0.0314931	3.14931	3	0	0.0235315	2.36	0	0	0	0.1492	0	-0.006434	0	0	A02	林业	福建省	350000	福州市	350100
592	2012	0.0286326	2.86326	3	0	0.0165616	0	0	0	0	0.13	0	0.030453	0	0	A02	林业	福建省	350000	福州市	350100
592	2013	0.0291999	2.91999	3	0	0.0164273	0	0	0	0	0.1446	0	0.059422	0	0	A02	林业	福建省	350000	福州市	350100
592	2014	0.098454	9.8454	3	0	0.0136265	0	0	0	0	0.1149	1	0.061048	0	0	A02	林业	福建省	350000	福州市	350100
592	2015	0.112795	11.2795	3	1.38629	0.0089403	2.15	0	0	0	0.0615	1	1.39544	0	0	A02	林业	福建省	350000	福州市	350100
592	2016	0.114125	11.4125	3	1.60944	0.007977	1.19	0	0	0	0.0536	1	0.018922	0	0	A02	林业	福建省	350000	福州市	350100
592	2017	0.109767	10.9767	3	1.09861	0.0333553	1.19	0	0	0	0.0477	1	0.002105	0	0	A02	林业	福建省	350000	福州市	350100
592	2018	0.116526	11.6526	3	0.693147	0.0426299	1.36	0	0	0	0.0778	1	-0.032778	1.09861	0	A02	林业	福建省	350000	福州市	350100
592	2019	0.120052	12.0052	4	0	0.024297	2.31	0	0	0	0.0818	1	0.057252	1.09861	0	A02	林业	福建省	350000	福州市	350100
592	2020	0.108022	10.8021	3	0	0.02048	2.45	0	0	0	0.0656	1	-0.083423	1.09861	0	A02	林业	福建省	350000	福州市	350100
592	2021	0.10997	10.997	3	0	0.0099966	2.33	0	0	0	0.0704	1	-0.240209	1.38629	0	A02	林业	福建省	350000	福州市	350100
592	2022	0.110783	11.0783	3	0	0.0109901	3.21	0	0	0	0.0733	1	-0.083103	1.38629	0	A02	林业	福建省	350000	福州市	350100
592	2023	0.042397	4.2397	3	0	0.0143209	3.45	0	0	0	0.0716	0	-0.061486	1.60944	0	A02	林业	福建省	350000	福州市	350100
593	2011	0.0219442	2.19442	1	0	0.010522	0	0	0	0.68	0.5222	0	0.18108	0	0	F52	零售业	四川省	510000	成都市	510100
593	2012	0.0220559	2.20559	1	0	0.0104358	0	0	0	0.38	0.534	0	0.005655	0	0	F52	零售业	四川省	510000	成都市	510100
593	2013	0.0231744	2.31744	1	0.693147	0.0179048	0	0	0	0.3693	0.3591	0	0.987094	0	0	F52	零售业	四川省	510000	成都市	510100
593	2014	0.0372164	3.72164	1	1.60944	0.0206613	0	0	0	0.4	0.4581	0	-0.003636	0	0	F52	零售业	四川省	510000	成都市	510100
593	2015	0.0447739	4.47739	1	1.38629	0.0195537	0	0	0	0.4	0.4761	0	-0.02267	1.09861	0	F52	零售业	四川省	510000	成都市	510100
593	2016	0.0192386	1.92386	1	0	0.0280202	0	0	0	0.91	0.2711	0	0.701135	0.693147	0	F52	零售业	四川省	510000	成都市	510100
593	2017	0.0244157	2.44157	1	0	0.0256617	0	0	0	0.96	0.2553	0	0.002547	1.38629	0	D45	燃气生产和供应业	四川省	510000	成都市	510100
593	2018	0.0342402	3.42402	1	0.693147	0.0264626	0	0	0	0.97	0.3117	0	-0.163923	1.38629	0	D45	燃气生产和供应业	四川省	510000	成都市	510100
593	2019	0.0376313	3.76313	1	0.693147	0.0245087	0.37	0	0	1.47	0.331	0	0.06442	1.60944	0	D45	燃气生产和供应业	四川省	510000	成都市	510100
593	2020	0.0368564	3.68564	1	0.693147	0.023429	1.03	0	0	1.21	0.3565	0	0.064519	1.38629	0	D45	燃气生产和供应业	四川省	510000	成都市	510100
593	2021	0.0568436	5.68436	2	1.09861	0.022281	1.73	0	0	1.25	0.3656	0	0.050591	1.79176	0	D45	燃气生产和供应业	四川省	510000	成都市	510100
593	2022	0.0570876	5.70876	2	1.09861	0.0247873	1.75	0	0	0.58	0.3539	0	0.047848	1.94591	0	D45	燃气生产和供应业	四川省	510000	成都市	510100
593	2023	0.0625365	6.25365	2	1.79176	0.0309293	0.58	0	0	0.58	0.386	0	-0.187964	1.60944	0	D45	燃气生产和供应业	四川省	510000	成都市	510100
595	2013	0.0404799	4.04799	1	0	0.116775	0	0	0	0.1291	0.1592	0	0.232194	1.38629	2.19722	C34	通用设备制造业	宁夏回族自治区	640000	银川市	640100
595	2014	0.055165	5.5165	2	0	0.129669	0	0	0	0.23	0.2245	0	0.078429	1.38629	2.19722	C34	通用设备制造业	宁夏回族自治区	640000	银川市	640100
595	2015	0.135784	13.5784	2	0	0.128018	15.06	0	0	0.4	0.1795	1	1.55189	1.38629	2.30259	C34	通用设备制造业	宁夏回族自治区	640000	银川市	640100
595	2016	0.127104	12.7104	1	0	0.125388	13.19	0	0	0.4933	0.2823	1	-0.112278	1.38629	2.30259	C34	通用设备制造业	宁夏回族自治区	640000	银川市	640100
595	2018	0.108484	10.8484	1	0.693147	0.0779426	13.86	0	0	0	0.253	1	-0.090747	0.693147	0	C34	通用设备制造业	宁夏回族自治区	640000	银川市	640100
595	2019	0.0334701	3.34701	1	0	0.0912067	15.4	0	0	0	0.2851	0	-0.455339	0.693147	0	C34	通用设备制造业	宁夏回族自治区	640000	银川市	640100
595	2021	0.0383333	3.83333	1	0	0.0949575	21.08	0	0	1.49	0.28	0	-0.185814	0	0.693147	C34	通用设备制造业	宁夏回族自治区	640000	银川市	640100
595	2022	0.0340804	3.40804	1	0	0.100368	21.37	0	0	1.28	0.2899	0	-0.104793	0	0	C34	通用设备制造业	宁夏回族自治区	640000	银川市	640100
595	2023	0.0394331	3.94332	1	0	0.108475	19.74	0	0	1.18	0.2974	0	-0.231638	0.693147	0	C34	通用设备制造业	宁夏回族自治区	640000	银川市	640100
596	2011	0.0218486	2.18486	1	0	0.0586056	0	0	0	0.27	0.0855	0	1.63095	0	2.07944	C15	酒、饮料和精制茶制造业	安徽省	340000	亳州市	341600
596	2012	0.0096291	1.22037	1	0	0.0604198	0	0	0	0.31	0.1476	0	0.222509	0	0	C15	酒、饮料和精制茶制造业	安徽省	340000	亳州市	341600
596	2013	0.0811285	8.11285	1	1.38629	0.0541909	0	0.693147	1.20482	0.2839	0.2177	0	0.108804	0	4.43082	C15	酒、饮料和精制茶制造业	安徽省	340000	亳州市	341600
596	2014	0.156447	15.6447	2	0.693147	0.0477879	0	0.693147	1.42857	0.35	0.2688	1	0.117105	0	4.26268	C15	酒、饮料和精制茶制造业	安徽省	340000	亳州市	341600
596	2015	0.157002	15.7002	2	2.07944	0.0415378	8.65	0	0	0.41	0.2354	1	0.156102	0.693147	3.97029	C15	酒、饮料和精制茶制造业	安徽省	340000	亳州市	341600
596	2016	0.157773	15.7773	2	2.19722	0.0802047	10.14	0	0	0.52	0.2136	1	0.229018	0	4.36945	C15	酒、饮料和精制茶制造业	安徽省	340000	亳州市	341600
596	2017	0.172083	17.2083	2	1.79176	0.0680972	7.76	0.693147	1.40845	0.7508	0.1765	1	0.151572	0	4.27667	C15	酒、饮料和精制茶制造业	安徽省	340000	亳州市	341600
596	2018	0.194788	19.4788	1	2.30259	0.0593196	11.63	1.09861	1.78571	0.78	0.141	1	0.173738	1.38629	4.72739	C15	酒、饮料和精制茶制造业	安徽省	340000	亳州市	341600
596	2019	0.174142	17.4142	1	2.07944	0.0566434	9.69	0.693147	0.900901	0.87	0.1242	1	0.174651	1.09861	4.7185	C15	酒、饮料和精制茶制造业	安徽省	340000	亳州市	341600
596	2020	0.106677	10.6677	1	2.19722	0.0615484	10.21	0.693147	0.704225	0.96	0.1184	0	0.10779	1.09861	4.96284	C15	酒、饮料和精制茶制造业	安徽省	340000	亳州市	341600
596	2021	0.208	20.7999	2	2.48491	0.0418391	9.1	1.38629	1.875	0.92	0.0781	1	0.651173	0.693147	5.0814	C15	酒、饮料和精制茶制造业	安徽省	340000	亳州市	341600
596	2022	0.206294	20.6294	2	2.56495	0.0371981	9.35	1.09861	1.12994	1.15	0.092	1	0.120559	1.38629	5.18178	C15	酒、饮料和精制茶制造业	安徽省	340000	亳州市	341600
596	2023	0.0922613	9.22613	4	1.94591	0.0317097	8.84	0	0	1.15	0.1298	0	0.159388	0	3.17805	C15	酒、饮料和精制茶制造业	安徽省	340000	亳州市	341600
597	2011	0.0579375	5.79375	3	0	0.146206	0	0	0	0	0.2519	0	-0.156423	1.09861	1.09861	C27	医药制造业	辽宁省	210000	沈阳市	210100
597	2012	0.0353305	3.53304	2	0	0.135367	0	0	0	2.08	0.2298	0	0.008191	0	0.693147	C27	医药制造业	辽宁省	210000	沈阳市	210100
597	2013	0.122131	12.2131	2	0	0.100132	0	0	0	3.0333	0.2048	1	-0.086425	1.79176	1.09861	C27	医药制造业	辽宁省	210000	沈阳市	210100
597	2014	0.158008	15.8008	3	2.07944	0.0856434	0	0	0	2.55	0.2027	1	0.726757	1.60944	1.79176	C27	医药制造业	辽宁省	210000	沈阳市	210100
597	2015	0.152633	15.2633	2	1.09861	0.0859143	9.38	0	0	2.91	0.3865	1	-0.130439	1.09861	2.70805	C27	医药制造业	辽宁省	210000	沈阳市	210100
597	2016	0.152672	15.2672	2	1.09861	0.0764113	11.68	0	0	2.686	0.3323	1	0.013743	1.09861	2.89037	C27	医药制造业	辽宁省	210000	沈阳市	210100
597	2017	0.149999	14.9999	1	1.79176	0.0696018	9.96	0	0	3.03	0.2961	1	0.046839	1.94591	2.3979	C27	医药制造业	辽宁省	210000	沈阳市	210100
597	2018	0.0880566	8.80566	2	1.38629	0.0596175	11.45	0	0	3.11	0.2487	0	0.410054	2.30259	2.3979	C27	医药制造业	辽宁省	210000	沈阳市	210100
597	2019	0.0884462	8.84462	1	2.56495	0.0554835	8.86	0	0	3.16	0.2782	0	0.090455	2.19722	2.48491	C27	医药制造业	辽宁省	210000	沈阳市	210100
597	2020	0.0840108	8.40108	1	1.94591	0.0561451	11.44	0	0	3.16	0.3909	0	0.052166	2.30259	1.79176	C27	医药制造业	辽宁省	210000	沈阳市	210100
597	2021	0.0679378	6.79378	1	0.693147	0.0494525	11.19	0	0	3.24	0.3418	0	0.040772	2.63906	1.38629	C27	医药制造业	辽宁省	210000	沈阳市	210100
597	2022	0.0741789	7.41789	1	1.60944	0.0511909	11.32	0	0	3.39	0.318	0	0.09859	2.07944	1.60944	C27	医药制造业	辽宁省	210000	沈阳市	210100
597	2023	0.0617868	6.17868	1	1.38629	0.0446372	12.41	0	0	3.57	0.2766	0	0.094506	1.79176	0.693147	C27	医药制造业	辽宁省	210000	沈阳市	210100
598	2011	0.146274	14.6274	3	0.693147	0.177903	0	0	0	2.16	0.4511	1	0.119488	1.79176	0	N78	公共设施管理业	四川省	510000	成都市	510100
598	2012	0.122315	12.2315	2	0	0.151818	0	0	0	2.48	0.3885	1	0.131542	1.60944	0	D46	水的生产和供应业	四川省	510000	成都市	510100
598	2013	0.124351	12.4351	2	0	0.196612	0	0	0	2.67	0.4802	1	0.561271	1.09861	0	D46	水的生产和供应业	四川省	510000	成都市	510100
598	2014	0.122749	12.2749	2	0	0.199951	0	0	0	3	0.4254	1	0.101557	1.09861	0	D46	水的生产和供应业	四川省	510000	成都市	510100
598	2015	0.122234	12.2234	1	0	0.180288	4.57	0	0	4.29	0.3936	1	0.107863	2.07944	0	D46	水的生产和供应业	四川省	510000	成都市	510100
598	2016	0.137422	13.7422	3	0	0.159649	4.61	0	0	4.7311	0.3727	1	0.10076	1.38629	0	D46	水的生产和供应业	四川省	510000	成都市	510100
598	2017	0.153128	15.3128	3	0.693147	0.209613	5.3	0	0	5.28	0.3914	1	0.112672	1.79176	0	D46	水的生产和供应业	四川省	510000	成都市	510100
598	2018	0.145497	14.5497	3	0	0.198654	5.2	0	0	6.11	0.3831	1	0.095119	1.79176	0	D46	水的生产和供应业	四川省	510000	成都市	510100
598	2019	0.152877	15.2878	3	1.09861	0.242987	6.19	0	0	5.7	0.3458	1	0.075495	1.09861	0	D46	水的生产和供应业	四川省	510000	成都市	510100
598	2020	0.39759	36.9914	3	0	0.239739	5.79	1.09861	100	6.57	0.2807	1	0.095773	1.09861	1.09861	D46	水的生产和供应业	四川省	510000	成都市	510100
598	2021	0.136328	13.6328	2	0	0.31118	5.25	0	0	7.42	0.2745	1	0.085965	1.60944	0	D46	水的生产和供应业	四川省	510000	成都市	510100
[truncated: 38,909 more rows]

## Sheet: Sheet2
id	年份	NQP	ESG	SA	Di	BR	Size	ROA	CCF	Bs	TOP	Age	Shar	Bg	BOTH	AO
4	2011	8.54888	1	0.568205	4.04305	-0.037651	19.4882	0.061321	0.055229	9	22.19	35	0.000649257	0.231475	0	1	0.061493	1
4	2012	9.57206	1	0.322957	0	-0.187263	18.4939	-1.20503	0.01513	8	22.19	35	0.00064888	-0.627535	0	1	0.113865	1
4	2013	8.57899	1	0.468065	0	1.83312	18.3224	-0.061412	0.342613	6	62.71	35	0.000613564	-0.001744	0	1	2.78976e-08	1
4	2014	8.53099	1	0.605439	0	0.472322	18.1572	-0.022854	5.20541	6	51.48	35	0.000608473	-0.152266	0	1	0.75	1
4	2015	9.32337	1	1.31433	0	8.58663	20.2559	0.036318	2.32232	7	28.22	35	0.000608473	0.020847	0	1		1
4	2016	8.77917	1	1.38784	0	2.03882	20.3288	0.011522	2.43647	7	12.46	35	0.000608473	0.075647	0	1		1
4	2017	11.6691	1	3.19943	0	2.27608	22.0012	0.052909	0.656561	7	12.42	35	0.000552777	4.32523	0	1		1
4	2018	12.617	1	4.18199	0	-8.91356	22.8265	0.064758	0.540168	7	20	35	0.000552777	1.28249	0	1		1
4	2019	12.8041	1	4.50989	0	-19.1881	23.0915	0.08331	0.277907	7	22.92	35	0.000552777	0.303401	0	1		1
8	2015	11.5893	1	4.48487	2.30259	-0.398717	23.0714	0.032666	0.364335	9	25.62	35	0.000292223	-0.019849	0	1		1
8	2016	15.4332	1	4.66087	5.33272	-0.203848	23.2119	0.037977	0.288119	9	12.98	35	0.000290604	0.150786	0	1		1
8	2017	10.0019	1	4.74043	2.77259	-0.314085	23.2749	-0.069531	0.156191	9	12.98	35	0.000252223	0.065072	0	1		1
8	2018	11.4689	1	4.69544	5.43808	-0.188887	23.2393	-0.111377	0.177488	9	12.98	35	0.000252223	-0.034988	0	1		1
8	2019	11.6923	1	2.72523	0	-0.248591	21.7617	0.060724	0.257168	11	11.15	40	0.000252223	-0.014218	0	1		1
8	2020	10.523	1	2.6736	0	-0.063547	21.7161	0.056417	0.245373	12	6.74	40	0.000217953	-0.027746	0	1		1
8	2021	10.9285	3	2.78805	3.80666	-2.18101	21.817	0.059295	0.18913	9	6.47	40	0.000217953	0.106102	0	1		3
8	2022	9.25043	3	2.97562	0	0.114046	21.9806	0.061776	0.186271	9	6.54	40	0.00236804	0.177782	0	1		3
8	2023	11.4014	5	3.3241	2.56495	0.002402	22.2794	0.077812	0.178618	9	3.69	40	0.00219731	0.348271	0	1		5
10	2013	1.22037	1	3.50528	4.04305	-0.79243	22.4322	0.068562	0.120299	9	3.62	40	0.00219731	0.165108	1	1		1
10	2014	1.22037	1	3.75009	4.04305	-1.63771	22.6361	0.061117	0.157561	9	3.62	40	0.00219867	0.226116	0	1		1
16	2011	17.7323	2	4.02038	4.45435	1.76654	22.8578	0.067107	0.349988	9	3.62	40	0.0017612	0.247429	0	1		2
16	2012	20.6524	2	4.27406	0	-0.88995	23.0628	0.04821	0.090391	9	3.62	40	0.00197144	0.227503	0	1		2
16	2013	22.6673	3	4.3371	4.99043	-0.023452	23.1133	0.083806	0.147326	9	11.08	40	0.00167586	0.051782	0	1		3
16	2014	18.9941	3	4.5046	3.43399	-0.602532	23.2466	0.128068	0.235793	9	15.45	40	0.00165697	0.142602	0	1		3
16	2015	18.7458	2	4.76303	6.82763	-0.457938	23.4499	0.087526	0.140323	9	14.84	40	0.00167365	0.22549	0	1		2
16	2016	19.1205	3	4.68147	5.72031	-1.24028	23.386	0.025796	0.11054	9	14.81	40	0.00216351	-0.061878	0	1		3
16	2017	18.1516	4	4.74597	5.07517	-1.05418	23.4366	0.107516	0.070571	9	15.01	40	0.00216326	0.051832	0	1		4
16	2018	22.8726	4	4.76328	3.8712	-0.656681	23.4501	0.055877	0.027376	9	15.19	40	0.00216325	0.01363	0	1		4
16	2019	21.9086	4	4.79415	1.38629	-0.813283	23.4742	0.034983	0.109526	5	29.06	40	0.00216325	0.035746	0	1		4
16	2020	23.0752	4	4.91099	1.09861	0.473217	23.5651	0.046902	0.084047	7	29.06	40	0.00255638	0.106989	0	1		4
16	2021	22.2445	2	5.07988	7.00488	3.38406	23.6955	0.042418	0.329909	9	15.1	40	0.00143823	0.139279	0	1		2
16	2022	22.4922	2	5.05158	5.92693	-0.208726	23.6737	0.024705	0.359167	8	8.7	40	0.00139273	-0.021539	0	1		2
16	2023	16.081	4	4.98811	4.80402	2.19457	23.6248	0.03079	0.286951	8	8.7	40	0.00139272	-0.047765	1	1		4
17	2014	8.37661	1	4.96527	4.21951	10.4305	23.6071	0.045404	0.556162	9	16.68	40	0.0013934	-0.017489	1	1		1
17	2015	7.61422	1	5.10655	7.15149	-0.68056	23.716	0.0783	0.727292	9	19	40	0.00145443	0.114995	0	1		1
17	2016	8.5888	1	4.07592	6.14419	-0.924028	23.0321	0.024759	0.233815	6	19	44	0.00143569	0.030053	0	1		1
17	2017	2.6315	1	3.66633	5.05625	-3.86347	22.699	-0.09613	0.275241	7	19	44	0.00143569	-0.277411	0	0		1
17	2018	2.32479	1	3.63119	4.59512	0.032059	22.67	0.006601	0.209986	8	19	44	0.00145743	-0.029772	0	0		1
17	2019	1.91268	1	4.02225	0	72.5626	22.9889	0.01192	0.138612	9	19	44	0.00137047	0.375594	0	0		1
17	2021	4.39287	2	4.01715	0	-7.19824	22.9848	0.016707	0.111688	9	21.75	44	0.00136165	-0.003814	0	1		2
17	2022	22.829	2	3.95402	0	-3.42461	22.9338	0.002112	0.106318	9	21.75	44	0.00081768	-0.04974	0	1		2
17	2023	3.68854	1	4.06215	2.19722	-1.31638	23.0211	0.011066	0.137872	9	21.75	44	0.000798653	0.091194	1	1		1
20	2011	9.70472	1	3.97518	0.693147	-7.16693	22.9509	0.023069	0.130618	7	21.75	44	0.000776958	-0.074011	1	0		1
20	2012	9.6083	1	4.13482	2.83321	-0.715184	23.0794	0.026331	0.079935	7	21.75	44	0.000850562	-0.004691	1	1		1
20	2013	9.45255	1	4.45146	1.94591	8.40293	23.331	0.010863	0.049091	7	21.75	44	0.000571821	0.286047	1	1		1
20	2014	9.46846	1	4.69889	2.99573	-5.99068	23.5246	0.006145	0.054358	7	21.75	44	0.000571445	0.213649	1	1		1
20	2015	9.17737	1	4.7328	2.3979	-8.40664	23.551	0.00143	0.070088	7	21.75	44	0.000588006	0.026693	1	1		1
20	2016	7.97143	1	4.70636	1.94591	-7.18302	23.5304	0.002743	0.156849	7	11.52	44	0.000587737	-0.02032	1	1		1
20	2017	8.63232	1	4.64118	1.09861	-0.391876	23.4797	0.003801	0.14493	7	11.52	44	0.000647365	-0.049486	1	1		1
20	2018	8.67915	1	4.72308	1.38629	-118.715	23.5434	0.003607	0.136194	7	11.52	44	0.000631087	0.065755	1	1		1
20	2019	8.75106	1	4.51385	2.70805	-1.40037	23.38	-0.089531	0.148061	5	11.52	44	0.00060857	-0.15072	0	1		1
20	2020	9.36137	1	4.75822	1.38629	19.7703	23.5707	0.005346	0.206097	7	11.52	44	2.8103e-06	0.210012	0	1		1
20	2021	12.21	3	5.16502	3.61092	6.66934	23.8828	0.215921	0.151445	7	11.52	44	0.00064899	0.366269	0	1		3
20	2022	12.378	3	5.61311	1.94591	-5.37851	24.2193	0.02027	0.202914	7	22.06	44	0.000486742	0.40012	0	1		3
20	2023	5.31323	2	5.95977	3.49651	19.021	24.4748	0.007865	0.15931	7	41.14	44	0.000506212	0.291098	0	1		2
21	2011	29.6724	4	6.17696	2.07944	1.08881	24.6328	0.010828	0.257608	7	41.14	44	0.000506212	0.171163	0	1		4
21	2012	23.587	4	5.86994	3.21888	-0.732835	24.409	0.020231	0.793921	7	41.14	44	2.05414e-05	-0.200531	1	1		4
21	2013	16.5415	3	0.80862	3.21888	0.559564	17.7569	0.112314	0.823676	9	41.14	32	0.0108995	-0.66016	0	1		3
21	2014	16.8653	3	0.899371	3.21888	1.90507	17.6413	-0.002309	0.652475	8	41.14	32	0.0109054	-0.109159	0	1		3
21	2015	23.7007	3	0.769614	4.00733	0.600105	17.8061	0.071949	0.350597	8	41.14	32	0.010878	0.179188	0	1		3
21	2016	23.9331	4	0.521306	4.38203	0.127866	18.1136	0.021468	0.293071	9	41.14	32	0.010878	0.359998	0	1		4
21	2017	18.8002	3	0.52485	0	0.004493	18.1093	-0.025675	0.118427	9	41.14	32	0.010878	-0.004309	0	1		3
21	2018	25.2889	2	0.650886	5.52943	1.81584	17.9544	-0.124557	0.454613	9	41.14	32	0.0118256	-0.143486	0	0		2
21	2019	20.328	3	0.287824	5.58725	-0.268445	18.394	-0.01684	0.384469	9	41.21	32	0.0157437	0.061266	0	1		3
21	2020	23.8829	4	1.14248	0	0.445232	19.9618	0.006163	0.336244	7	42.13	32	7.14484e-05	-0.015024	0	1		4
21	2021	32.8024	3	1.10677	5.51343	0.299048	19.9253	0.006765	0.247925	7	42.13	32	3.6352e-05	-0.01129	0	1		3
21	2022	24.3872	3	1.16747	6.68461	-0.374374	19.9872	0.01119	0.236583	7	55.96	32	4.84694e-05	0.069057		0		3
21	2023	17.6224	3	1.16205	5.22575	-0.066478	19.9817	-0.016236	0.097409	7	55.96	32	3.6352e-05	0.021594		1		3
30	2013	7.09244	1	1.62552	0	-0.505869	20.4446	0.00549	0.298596	6	55.96	32	3.6352e-05	0.694268	0	1		1
30	2014	6.448	1	1.58305	5.43808	1.09149	20.4029	0.012643	0.525428	7	49.54	32	3.84608e-05	-0.040812	0	1		1
30	2015	4.12435	1	1.49934	0	-1.64658	20.3204	0.015522	0.424214	7	49.64	32	3.84608e-05	-0.079225	0	0		1
30	2016	9.47237	1	1.51921	5.68017	-0.306987	20.34	0.004756	0.173252	7	49.64	32	4.53517e-05	0.019838	0	1		1
30	2017	5.25501	1	1.59067	0	-0.660027	20.4104	-0.008911	0.076339	7	49.64	32	5.32563e-05	0.072917	0	0		1
30	2018	4.87013	1	2.07204	0.693147	-0.349535	20.874	0.006612	2.23031	7	49.64	32	7.33921e-06	0.589859		0		1
30	2019	5.68123	1	2.06496	1.60944	0.487355	20.8674	-0.003637	0.335347	7	49.64	32	7.33921e-06	-0.006666		1		1
30	2020	6.79712	1	1.44367	0	-0.076165	20.2652	0.008629	0.263651	6	49.64	32	7.36515e-06	-0.452397	0	1		1
30	2021	9.00314	1	1.43935	1.09861	3.66937	20.2609	0.001547	0.095412	6	44.51	32	7.36515e-06	-0.004289	0	1		1
30	2022	7.60065	1	1.41892	1.60944	5.37954	20.2405	0.00534	0.175051	6	44.51	32	0.000300133	-0.020123	0	1		1
30	2023	9.07663	2	1.41415	0	0.219948	20.2358	0.00889	0.132721	6	44.51	32	0.000300124	-0.004742	0	1		2
32	2011	4.33951	1	1.43617	1.09861	-0.483841	20.2577	0.01088	0.105136	6	44.51	32	9.03815e-05	0.02217	0	1		1
32	2012	5.39627	1	1.48649	0	13.0014	20.3076	0.010913	0.66868	6	44.51	32	0.0240975	0.051218	0	1		1
32	2013	5.33817	1	3.44809	2.63906	-3.81577	22.0778	0.038915	0.900974	7	44.51	31	0.0240749	0.013716	0	1		1
32	2014	4.45433	1	3.66018	1.60944	1.9629	22.2591	-0.004964	0.402419	7	43.51	31	0.0240071	0.17508	0	1		1
45	2015	3.66736	2	3.75793	0.693147	-0.810316	22.3419	0.012004	0.414559	9	36.61	31	0.0240071	0.086301	0	1		2
45	2016	2.58726	1	3.59344	0	-0.494737	22.2023	0.050725	0.685766	9	34.51	31	0.0417859	-0.130284	0	1		1
45	2017	11.6632	2	3.48726	2.77259	-1.25354	22.1115	0.056766	0.900998	9	40	31	0.0417859	-0.086862	0	1		2
45	2018	11.7932	2	3.56188	0.693147	-1.13536	22.1754	0.073567	1.95511	9	40	31	0.0431225	0.066014	0	1		2
45	2019	11.4584	2	3.47914	0	1.67508	22.1045	0.085731	1.02655	9	40	31	0.0417859	-0.068441	0	1		2
45	2020	10.9839	2	3.78071	2.07944	-1.02007	22.3611	0.137866	1.66092	9	33.81	31	0.0417859	0.177565	0	1		2
45	2021	11.9255	2	3.5781	2.83321	0.117823	22.1892	0.073061	1.12902	9	33.81	31	0.0438845	-0.157933	0	1		2
45	2022	12.3585	2	3.8446	2.07944	0.129857	22.4149	0.048991	0.674267	9	33.81	31	0.0198774	0.101832		1		2
45	2023	5.98262	2	4.09107	0.693147	-0.173474	22.6204	0.053452	0.374698	9	33.81	31	0.0197074	0.228109	0	1		2
49	2011	9.1083	1	4.62933	0	0.755011	23.059	0.021297	0.309913	9	31.31	31	0.0187812	0.550543	0	1		1
49	2012	9.1562	1	4.61047	0.693147	0.076058	23.0438	0.00083	0.256792	9	31.44	31	0.0187812	-0.015033	0	1		1
49	2013	2.60803	1	4.98621	0	0.076883	23.3426	0.011574	0.205504	9	29.99	31	0.0176928	0.348204	0	1		1
49	2014	9.27799	1	5.05162	1.60944	-0.006582	23.394	0.011111	0.252781	9	30.13	31	0.0174956	0.052735	0	1		1
49	2015	10.0592	1	5.04162	0	0.559272	23.3861	0.012601	0.173164	9	30.13	31	0.0172305	-0.007813	0	1		1
49	2016	11.2396	1	4.78623	3.17805	-0.406701	23.1843	0.019095	0.154964	9	15.13	31	0.0168348	-0.182747	0	1		1
49	2017	11.2678	1	5.2292	2.19722	0.405786	23.5326	0.034573	0.200748	9	15.13	31	0.0168348	0.416656	0	1		1
49	2018	11.6352	1	5.18167	0.693147	0.102426	23.4957	0.035343	0.127309	9	15.13	31	0.0168363	-0.036306	0	1		1
49	2019	5.64536	1	5.36592	0	-0.118813	23.6385	0.023945	0.125796	9	15.13	31	0.0135075	0.153564	0	1		1
49	2020	6.01231	1	5.57313	1.09861	-0.167724	23.7976	0.044054	0.342178	8	27.39	31	0.0112625	0.172395		1		1
49	2021	7.05776	2	5.86777	1.38629	-0.938236	24.0209	0.030835	0.30916	9	27.39	31	0.0112625	0.25026	0	1		2
49	2022	8.39233	2	1.39841	2.94444	-0.419796	20.5352	0.02337	0.288135	9		40	0.011261	0.123196	0	1		2
49	2023	7.75597	2	1.39836	0	0.894823	20.5351	-0.07538	0.089151	9	24.31	40	0.0118884	0.002813	0	1		2
50	2011	13.1078	1	1.26485	1.79176	-1.21915	20.4047	0.011644	0.120923	11	24.31	40	0.0104016	-0.159276	0	0		1
50	2012	13.9961	2	1.25963	0.693147	-0.63832	20.3996	0.013553	0.183146	11	24.41	40	0.0104016	-0.005188	0	0		2
50	2013	13.0862	2	1.27949	0.693147	-0.684003	20.4191	0.016373	0.144692	12	24.41	40	0.0087063	0.019696	0	0		2
50	2014	13.7771	2	1.52409	0	-0.654846	20.6567	-0.02468	0.122534	12	24.41	40	0.0082207	0.268266	0	0		2
50	2015	16.213	2	1.46575	1.09861	0.871036	20.6005	0.036703	0.106019	12	24.41	40	0.00630198	-0.054708	0	0		2
50	2016	17.9627	2	1.36134	4.09434	0.282613	20.4991	0.018485	0.12422	12	24.41	40	0.00720668	-0.132627	0	1		2
50	2017	17.7342	3	1.56645	1.94591	0.187632	20.6974	0.02218	0.099193	9	24.41	40	0.00358791	0.219298	0	1		3
50	2018	16.638	2	1.66949	3.21888	0.838375	20.7958	0.022724	0.124817	9	24.41	40	0.00378605	0.103405	0	1		2
50	2019	17.2151	2	1.52732	4.00733	0.436238	20.6598	0.013908	0.239711	9		40	0.00357474	-0.124399	0	1		2
50	2020	17.4979	2	1.6873	2.56495	0.188279	20.8127	0.008322	0.288736	9		40	0.00127974	0.165207	0	0		2
50	2021	21.0067	4	1.80217	3.55535	18.6416	20.9213	0.004209	0.124396	9		40	0.00124969	0.114737	0	0		4
50	2022	21.1742	4	1.90696	0	2.22202	21.0196	0.008791	0.083135	9	16.23	40	0.0016362	0.103252	0	0		4
50	2023	14.9452	4	2.00546	0	-0.998152	21.1112	0.010221	0.083624	9	16.23	40	0.00124969	0.095983	0	0		4
63	2011	33.6713	3	2.07082	4.41884	-0.391905	21.1717	0.017009	0.14564	9	16.23	40	5.66669e-06	0.062323	0	0		3
63	2012	33.296	4	2.03434	2.83321	1.43743	21.138	0.010455	0.211065	9	16.23	40	0.108241	-0.033145	0	0		4
63	2013	34.4525	3	2.31157	3.78419	0.443701	21.3919	0.0147	0.186138	8	16.54	40	0.10882	0.289078	0	0		3
63	2014	36.078	4	2.50376	4.38203	0.577401	21.565	0.015142	0.194106	8	21.8	40	0.1089	0.189009	0	1		4
63	2015	36.9914	4	2.59597	3.13549	-1.37069	21.6473	0.029598	0.247059	9	24.82	40	0.1089	0.085719	1	1		4
63	2016	36.9914	4	2.50741	4.12713	-0.225405	21.5683	0.009605	0.154576	9	25	40	0.10858	-0.075939	1	1		4
63	2017	36.9914	6	2.42635	3.3322	-1.16775	21.4956	-0.012087	0.139648	9	25.54	40	0.108986	-0.070133	1	0		6
63	2018	36.9914	7	4.16913	2.99573	-1.13759	22.6848	0.083031	0.293973	8	53.73	31	0.108241	0.134041	1	1		7
63	2019	36.9914	7	4.19629	4.47734	-0.915127	22.7072	0.092477	0.474869	8	53.73	31	0.108241	0.02261	1	1		7
63	2020	36.9914	7	4.32583	2.94444	-0.84685	22.8133	0.064925	0.473297	9	53.52	31	0.00807593	0.111986	1	0		7
63	2021	36.9914	6	4.46757	3.3673	20.4265	22.9286	0.074575	0.467493	9	48.03	31	1.22194e-06	0.122148	1	0		6
63	2022	36.9914	5	4.63266	4.68213	0.116461	23.0616	0.079011	0.422902	9	55.44	31	1.22194e-06	0.14233	1	0		5
63	2023	36.9914	5	4.78244	3.09104	-1.51685	23.1813	0.074787	0.302517	9	58.02	31	1.22194e-06	0.127145	1	0		5
66	2011	15.3806	5	4.90949	3.21888	-0.429183	23.2821	0.068359	0.299118	9	58	31	1.22194e-06	0.106014	1	0		5
66	2012	16.3282	5	5.05259	4.77912	-13.8142	23.3948	0.06282	0.531685	9	58.12	31	5.92882e-07	0.119258	1	0		5
66	2013	15.2681	5	5.08736	2.99573	-0.183822	23.422	0.052376	0.070569	9	58.2	31	5.92882e-07	0.027621	1	0		5
66	2014	17.3976	5	4.04622	2.83321	-31.5096	22.6163	0.082783	0.217458	9	59.31	32	3.24973e-07	0.002609	1	1		5
66	2015	18.1807	5	3.91158	4.90527	-1.86432	22.5044	0.102842	0.09151	10		32	3.24973e-07	-0.096465	1	1		5
66	2016	18.6375	4	4.232	3.3322	-10.8753	22.7693	0.072066	0.200274	11		32	2.27369e-05	0.30327	1	1		4
66	2017	27.0709	5	4.53963	2.83321	8.14581	23.019	0.077711	0.192873	8		32	2.27369e-05	0.268583	1	0		5
66	2018	27.0271	6	5.21187	5.0689	-0.718184	23.5502	0.147687	0.482182	8	66.24	32	0.0002674	0.700997	1	0		6
66	2019	27.1858	6	5.23297	3.97029	4.12908	23.5666	0.16408	0.20326	8	66.24	32	0.0002674	-0.020947	1	1		6
66	2020	20.8503	7	5.60904	3.21888	19.5483	23.8554	0.128045	0.182653	8	66.24	32	2.46045e-05	0.334844	1	0		7
66	2021	20.9513	4	6.36751	7.39756	0.10152	24.4219	0.082333	0.23864	8	60.67	32	2.2213e-05	0.669669	1	0		4
66	2022	18.5578	4	6.15589	6.35437	0.107778	24.2659	0.048765	0.29948	8	60.67	32	0.086956	-0.158125	1	0		4
66	2023	11.0544	4	6.26134	7.85244	-1.70381	24.3438	0.028928	0.126702	8	60.67	32	0.0653074	0.081039	1	0		4
68	2013	10.4525	1	6.77032	4.04305	-0.432086	24.7147	0.052666	0.214661	7	59.14	32	0.0632028	0.448956	1	0		1
68	2014	15.8281	1	7.01198	4.2485	0.985235	24.8878	0.05685	0.176829	8	54.27	32	0.0641639	0.189007	1	1		1
68	2016	15.7126	1	6.98182	2.07944	0.855974	24.8663	0.030645	0.131415	8	54.26	32	0.0640591	-0.021276	1	1		1
68	2017	12.3827	1	7.18175	4.39445	1.26715	25.0083	0.036285	0.068937	7	54.26	32	0.0654508	0.152615	1	1		1
68	2018	13.551	1	7.45154	0	0.825799	25.1981	0.034564	0.072351	8	46.21	32	0.0646086	0.208939	1	1		1
68	2019	13.7262	1	7.73322	2.3979	-0.0674	25.3939	0.02128	0.139613	7	46.21	32	0.0528972	0.216311	1	1		1
70	2011	3.75774	1	7.95796	1.94591	1.05843	25.5485	0.005898	0.108409	8	46.21	32	0.057216	0.164003	0	1		1
70	2012	2.15187	1	8.0266	4.68213	0.615607	25.5954	0.024183	0.145374	8	46.21	32	0.0549898	0.048065	0	1		1
70	2013	4.28755	1	8.31524	0	-0.113563	25.7914	0.025606	0.125381	8	45.78	32	0.058945	0.216529	0	1		1
70	2014	10.0813	1	8.43392	4.43082	-0.05849	25.8714	0.014585	0.1884	8	45.78	32	0.0572145	0.083228	1	1		1
70	2015	13.8258	1	8.19243	0	0.324536	25.7083	0.041117	0.243096	9	45.96	32	0.0572318	-0.150464	1	1		1
70	2016	10.6523	1	8.27213	1.60944	0.452765	25.7623	0.054177	0.506201	9	46.1	32	0.0626176	0.055474	1	1		1
70	2017	13.3508	1	1.62116	5.24175	2.04053	20.3617	0.039532	0.526759	5	46.21	30	0.0623782	0.105178	0	1		1
70	2018	13.0737	1	1.67577	0	2.22361	20.4154	0.037144	0.448092	5		30	0.0623931	0.013785		1		1
70	2019	13.5111	1	1.69221	0	1.11444	20.4315	0.001127	0.457258	5	26.36	30	0.0614826	0.016257		1		1
70	2020	15.2369	1	1.63591	0.693147	-0.231369	20.3762	0.04907	0.514083	7	26.36	30	0.060977	-0.053808	1	1		1
70	2021	21.2764	2	1.58297	0	0.008482	20.324	0.053105	0.323311	7	24.1	30	0.0613229	-0.050914	1	1		2
70	2022	20.5232	2	1.56635	0	-0.325765	20.3075	0.046522	0.364362	6	26.36	30	0.0654258	-0.01632	1	1		2
70	2023	10.0403	3	1.56705	0	-362.161	20.3082	0.019952	0.544012	5	26.36	30	0.0547579	0.000687	1	1		3
78	2011	7.81742	1	1.59759	0	-7.43003	20.3384	0.017583	0.596809	7	28.54	30	0.0592004	0.029514	0	1		1
100	2011	19.0151	3	1.41214	0	-0.658953	20.1537	0.078143	0.41184	7	31.65	30	0.0574565	-0.168635	0	1		3
100	2012	19.1486	5	1.76566	0	-1.85472	20.5033	0.047368	2.92639	7	31.65	30	0.0633684	0.418479	0	1		5
100	2013	25.7459	6	2.53123	0	-2.62486	21.2273	0.024591	2.50722	9	41.65	30	0.0633684	1.06267	0	1		6
100	2014	23.5974	6	2.62767	0	1.52911	21.3156	0.027052	0.736821	9	42.88	30	0.0586157	0.092306	0	1		6
100	2015	26.2252	6	2.67079	0	0.630463	21.3549	-0.043064	3.899	9	43.04	30	0.0581378	0.040058	0	1		6
100	2016	26.2179	5	3.13599	0	-1.79891	21.7712	0.016559	2.58543	9		30	0.0583399	0.516361	0	1		5
100	2017	25.7643	5	3.1244	0	-1.29991	21.761	-0.040241	1.32635	8		30	0.0583399	-0.010161	0	1		5
100	2018	32.0391	6	3.18195	0	-0.406537	21.8116	0.002862	1.90044	8		30	0.0557675	0.02942	0	0		6
100	2019	34.9223	4	3.5594	0	0.10116	22.139	-0.021184	2.33199	7	66.52	30	0.0435204	0.387349	0	1		4
100	2020	34.9562	3	3.58079	4.51086	-0.09126	22.1573	0.017556	1.10946	9	53.04	30	0.0300459	0.018487	0	1		3
100	2021	36.9914	4	3.69354	3.8712	-2.65261	22.2535	-0.013488	0.553254	9	53.04	30	0.0300873	0.100925	0	1		4
100	2022	36.9914	4	3.67097	0	-90.8653	22.2343	-0.004089	0.499483	8	53.15	30	0.0300749	-0.019008	0	1		4
100	2023	19.5295	5	3.7798	0	-17.1212	22.3266	0.008753	0.470519	9	53.15	30	0.0198023	0.096691	0	1		5
153	2011	2.62735	1	3.89951	0	-4.76626	22.4274	0.013666	0.161107	9	50.45	30	0.0197478	0.106066	0	1		1
153	2012	3.68905	1	2.66196	3.4012	0.69255	21.3469	-0.174656	0.090289	11	48.65	30	0.0195473	0.259481	0	1		1
153	2013	2.50173	1	2.09085	3.66356	0.57443	20.8161	0.008187	0.036904	11	48.65	30	0.0200109	-0.036322	0	1		1
153	2014	2.96061	1	1.85412	5.15906	0.976029	20.5892	-0.106075	0.456306	11	47.31	30	0.00394835	-0.176724	0	0		1
153	2015	2.58159	1	2.19578	3.8712	-1.46296	20.9153	0.024975	0.253491	11	45.68	30	0.000239329	-0.03917	0	1		1
153	2016	9.79357	1	2.29549	0	0.565994	21.0089	-0.007469	0.521796	11	45.23	30	0.000994403	0.098067	0	1		1
153	2017	9.83287	1	2.72914	5.2575	1.58528	21.4078	0.060601	0.814019	11	45.23	30	0.000820755	0.490298	0	1		1
153	2018	10.0733	1	2.70545	0	-0.554846	21.3864	0.108088	0.274623	11	45.23	30	0.000820051	-0.02125	0	1		1
153	2019	2.62983	1	2.71615	1.09861	10.3063	21.3961	0.003064	0.467755	11	45.23	30	0.000472026	0.009757	0	1		1
153	2020	3.49369	1	3.49703	0	6.61538	22.0855	-0.035535	0.377899	11	45.23	30	0.000514043	0.992501	0	1		1
153	2021	4.10596	1	4.09532	1.60944	21.9131	22.5908	0.178963	0.567808	11	44.8	30	0.000514075	0.248816	0	1		1
153	2022	10.6405	1	4.61609	2.56495	12.7557	23.0162	0.088624	0.319993	11	44.8	30	0.000214962	0.530248	0	1		1
153	2023	4.16664	1	5.12492	1.09861	2.3564	23.4201	0.026873	0.043309	11	22.86	30	0.000214962	0.497671	0	1		1
155	2011	5.04022	2	1.24963	0	-0.23173	19.9486	0.000949	0.090632	6		29	0.000196355	0.110057	0	1		2
155	2013	30.077	3	1.26643	3.17805	5.2408	19.9658	0.030982	0.037044	5		29	0.000196355	0.02817	0	1		3
155	2017	5.19729	1	0.951538	0	-0.834705	19.6398	0.005391	0.161208	7		29	0.000196355	-0.27436	0	1		1
155	2018	5.23897	1	0.762382	3.52636	-0.330853	19.4393	-0.120043	0.168832	8	59.85	29	0.000196355	-0.181681	0	1		1
155	2019	3.22473	1	1.50919	2.19722	4.60082	20.2109	0.040588	0.103928	9	59.85	29	0.000196356	0.196638	0	1		1
157	2011	19.0929	3	1.5269	4.14313	1.23231	20.2285	0.046989	0.086495	9	59.85	29	0.000196356	0.01783	0	1		3
157	2012	22.3027	1	1.60202	2.63906	-0.793274	20.3032	0.007401	0.125214	9	52.62	29	0.000193288	0.110731	0	1		1
157	2013	18.5493	2	1.53032	4.33073	-1.3389	20.2319	-0.002482	0.135306	9	45.62	29	0.000193288	-0.074295	0	1		2
157	2014	23.1211	3	1.5984	2.56495	3.60453	20.2996	-0.060383	0.180712	9	45.62	29	0.000193288	0.07003	0	1		3
157	2015	29.0277	3	1.86513	4.48864	2.43192	20.5611	0.103106	0.092363	9	45.62	29	0.000193288	0.298868	0	1		3
157	2016	23.7911	3	2.40472	4.81218	0.719197	21.0734	0.110642	0.132193	9	45.62	29	0.000193288	0.669116	0	1		3
157	2017	23.2072	3	2.6994	3.3322	-1.21517	21.3445	0.091728	0.083196	8	45.62	29	0.000193288	0.31141	0	1		3
157	2018	20.6295	1	3.36713	0	-0.903783	21.9385	0.081587	0.066651	9	45.62	29	0.000194422	0.811183	0	1		1
157	2019	18.433	2	3.74783	4.90527	-0.147301	22.2656	0.066918	0.187948	9	45.62	29	0.000194422	0.38697	0	1		2
157	2020	24.3435	2	3.37782	0	0.90788	21.9478	0.090548	0.096883	9	25.76	29	0.000194422	-0.272271	0	1		2
157	2021	27.1292	4	3.86109	0	0.260822	22.3614	0.067956	0.040807	9	25.76	29	0.000193179	0.512323	0	0		4
157	2022	31.9769	5	4.33322	0	0.329946	22.7539	0.047745	0.042808	9	20.81	29	0.000193179	0.48064	0	1		5
157	2023	26.2312	5	4.51297	0	-0.619535	22.9005	0.05958	0.086872	9	20.81	29	0.000132821	0.157888	0	1		5
301	2018	6.223	1	4.5057	7.93057	-0.171358	22.8946	0.076377	0.079138	9	19.02	29	0.000132821	-0.00588	1	1		1
301	2019	6.07006	1	4.54298	8.23191	-0.392317	22.9248	0.081895	0.0344	9	19.02	29	0.000132821	0.030688	1	1		1
301	2020	4.78665	1	4.76137	0	-3.20056	23.1007	0.073671	0.197641	9	15.85	29	0.000116714	0.18649	1	0		1
301	2021	6.48143	2	1.04228	8.43229	0.462697	20.2239	0.053578	1.31924	5	15.85	41	0.000116714	0.163416	1	0		2
301	2022	5.43156	2	1.39328	0	0.886584	20.569	0.028738	0.507405	5		41	0.000116714	0.421875	1	1		2
301	2023	11.8636	5	1.57751	0	-0.399832	20.7462	-0.034062	0.175081	7		41	0.0027863	0.205146	1	1		5
333	2013	21.5867	1	1.71533	0	-0.675884	20.8772	0.039804	0.290935	9		41	0.0027863	0.139707	1	1		1
333	2014	25.5559	3	1.99131	0	3.80318	21.1352	0.06186	0.185114	9	20.24	41	0.00261162	0.346731	0	0		3
333	2015	21.8977	2	1.85596	0	-0.654586	21.0093	0.042583	0.182881	9	20.24	41	0.00261162	-0.118285	0	0		2
333	2016	27.0011	2	2.02022	0	0.103922	21.1619	0.06119	0.930365	9	20.24	41	0.0025464	0.164869		1		2
333	2017	29.9678	3	3.26829	0	-0.120353	22.266	0.018248	0.272731	9	17.01	41	0.0025464	1.31726	0	1		3
333	2018	22.7519	1	3.35252	0	0.054818	22.3373	-0.014147	0.683782	9	12.5	41	0.00253545	0.073926	0	1		1
333	2019	24.8088	2	3.65608	0	0.340031	22.5914	-0.047853	0.338375	9	10.92	41	0.00264013	0.289225	0	1		2
333	2020	24.5064	2	3.90847	10.0018	-0.516708	22.7991	0.017638	0.274782	8	10.04	41	0.00267503	0.230918	0	1		2
333	2021	25.8572	3	3.92079	0	-0.351964	22.8092	0.031971	0.181199	7	9.09	41	0.00264013	0.010117	0	0		3
333	2022	26.2208	3	3.88237	0	8.31404	22.7778	0.017629	0.33477	7	9.09	41	0.00264013	-0.061955	0	0		3
333	2023	14.0175	4	3.90927	0	3.44836	22.7998	0.035796	0.16966	9	9.09	41	0.000923762	0.022244	0	0		4
338	2011	20.8349	3	4.75703	0	1.28279	23.4764	0.043774	1.19736	9	9.09	41	0.00110508	0.329951	0	1		3
338	2012	20.2515	1	5.17277	0	1.71471	23.7973	0.025687	0.825228	8	9.09	41	6.33802e-05	0.378282	0	1		1
338	2013	21.3054	1	5.17583	0	6.35416	23.7996	0.026254	0.407637	9	9.09	41	1.82959e-07	0.002342	0	1		1
338	2014	25.4507	1	5.59024	0	21.6962	24.1128	0.027222	0.194172	9	8.72	41	1.40269e-06	0.367766	0	0		1
338	2015	24.6145	1	6.55458	0	2.06971	24.8182	0.016388	0.157739	9	8.72	41	2.12526e-07	0.096544	0	0		1
338	2016	27.2608	2	6.67555	0	5.46679	24.9046	0.012672	0.262692	9	10.08	41	0.0300091	0.090178	0	1		2
338	2017	26.6953	2	6.84017	0	-0.869907	25.0213	0.020046	0.188389	9	10.22	41	0.0300091	0.123861		1		2
338	2018	30.9248	2	6.96692	0	-1.34508	25.1107	0.019177	1.15078	11	10.87	41	0.0300091	0.093458	0	1		2
338	2019	31.7724	3	2.25483	0	-0.533442	20.9708	0.05664	1.2197	7	11.11	30	0.0300091	0.14308	0	1		3
338	2020	36.9914	3	2.34534	0	-0.263208	21.0554	0.028157	0.390061	9		30	9.23036e-06	0.08826	0	1		3
338	2021	36.9914	6	2.25949	0	-0.935106	20.9752	-0.137764	0.318617	9		30	6.78212e-06	-0.07159	0	1		6
338	2022	36.9914	7	2.39326	0	-0.528458	21.0999	0.009008	0.255513	7		30	6.78212e-06	0.132243	0	0		7
338	2023	35.1626	7	2.2219	3.04452	0.394471	20.9399	0.00414	0.093041	7	69.25	30	9.30234e-06	0.054119	0	1		7
400	2011	13.8601	3	2.18658	3.66356	-0.548817	20.9067	-0.048666	0.096095	7	69.25	30	9.30234e-06	-0.032691	0	0		3
400	2012	3.80882	1	2.11717	3.29584	-9.23551	20.8411	0.006389	0.256989	6	60.26	30	9.30234e-06	-0.063491	0	0		1
400	2013	28.3783	1	2.28445	3.13549	-0.370559	20.9985	0.017843	0.192939	7	60.26	30	9.30234e-06	0.110757	0	0		1
400	2014	28.2059	3	2.34661	2.77259	0.119768	21.0566	0.013774	0.284309	7	60.26	30	0.000185135	0.059736	0	0		3
400	2015	28.097	3	2.41189	2.07944	-0.754521	21.1172	0.02491	0.542916	7	51.14	30	0.000137434	0.062514	0	0		3
400	2016	31.6766	3	2.73371	2.56495	-1.2394	21.412	0.02425	0.30808	7	51.14	30	0.000135464	0.342826	0	0		3
400	2017	32.461	3	2.82559	2.30259	1.28638	21.4949	0.027449	0.211925	7	51.14	30	0.000101598	0.086464	0	0		3
400	2018	36.9914	3	2.90728	2.70805	1.57842	21.5682	0.002768	0.21405	7	51.14	30	8.68453e-05	0.07603	0	0		3
400	2019	33.7397	4	3.03123	2.30259	-5.41593	21.6786	0.031313	0.04481	7	51.14	30	8.68453e-05	0.116743	0	0		4
400	2020	29.2918	3	3.42282	2.63906	-3.28913	22.0215	0.025306	0.090333	7	51.14	30	0.00729323	0.408978	0	1		3
400	2021	28.118	2	3.65341	1.60944	-0.371525	22.2193	0.015281	0.279548	7	50.86	30	0.00729323	0.218807	0	1		2
400	2022	29.7389	2	4.15273	4.82831	27.7025	22.6383	0.096653	0.294587	7	32.16	30	0.00644682	0.520346	0	1		2
400	2023	15.5864	6	4.29424	1.60944	23.2071	22.7548	0.150949	0.297845	7	32.16	30	0.00766748	0.123525	0	1		6
403	2018	1.98626	1	4.70761	2.94444	6.85374	23.0897	0.210732	0.16082	7	32.16	30	0.00766748	0.397805	0	1		1
403	2019	1.22037	1	4.78844	4.93447	-3.05	23.1542	0.030498	0.241605	7	32.16	30	0.00511166	0.066715	0	1		1
403	2020	7.9298	1	4.84216	4.94164	1.38135	23.197	0.032172	0.220239	7	27.16	30	0.000723336	0.043702	0	1		1
403	2021	9.60443	1	1.2	4.94164	1.63645		0.018497	0.105938	7	27.16	30	0.000723984	0.03109	0	1		1
403	2022	9.12128	1	3.12933	5.02388	1.56926	21.6592	0.001493	0.063516	6		27	0.000723984	-0.07127	0	1		1
403	2023	2.34156	2	3.08209	0	-1.01983	21.6171	0.001608	0.109113	6		27	0.00230663	0.00848	1	1		2
404	2011	8.98768	1	3.1069	0	-0.291112	21.6392	-0.02329	0.240669	11		27	0.00230697	0.025076	1	1		1
404	2012	9.38848	1	3.18656	0	-0.77973	21.7099	0.002177	0.222859	9	46.66	27	0.00230752	0.073241	1	1		1
404	2013	9.72098	1	3.32075	5.6058	-0.627694	21.8281	0.046407	0.237695	9	46.66	27	0.00268133	0.125489		1		1
404	2014	13.0227	3	3.68875	2.19722	-0.305896	22.147	0.05935	0.277068	9	34.76	27	0.00268133	0.375624	0	1		3
404	2015	9.92436	2	3.77775	4.62497	-0.422461	22.223	0.019933	1.81109	9	31.63	27	0.00527956	0.078967	0	1		2
404	2016	11.8358	2	4.61481	5.1299	-0.373863	22.9182	0.026738	1.61258	9	31.73	27	0.00438964	0.995332	0	1		2
404	2017	14.6715	3	5.40181	0	-15.8416	23.5424	0.022958	0.13716	9	31.73	27	0.00495544	0.866745	0	1		3
404	2018	15.9851	3	5.75827	0	-1.18425	23.8168	0.009402	0.209579	9	31.73	27	0.0048103	0.31564	0	1		3
404	2019	16.4605	3	6.00237	0	-0.357087	24.0018	0.015551	0.158972	9	31.73	27	0.00484753	0.203256	0	0		3
404	2020	17.7804	2	6.09903	0	0.426313	24.0744	0.029506	0.227238	9	31.73	27	0.00496775	0.075366		1		2
404	2021	13.1724	1	6.28362	0	6.32301	24.2123	0.000609	0.197997	9	31.73	27	0.0041823	0.147773	1	1		1
404	2022	13.7133	2	6.09471	8.81789	2.77072	24.0712	-0.005695	0.242122	8	31.73	27	0.00422349	-0.131567	0	1		2
404	2023	5.82245	1	6.35744	0	-16.3581	24.2671	-0.042954	0.216171	9	31.73	27	0.00613727	0.21634	1	1		1
407	2012	2.80826	1	6.22568	0	-0.831781	24.1691	0.058913	0.355937	7	29.58	27	0.000118957	0.048473	1	1		1
407	2013	4.62737	2	6.20836	3.4012	1.20041	24.1562	0.062682	0.897408	9	29.58	27	0.000118957	-0.012829	1	1		2
407	2014	2.5877	1	6.27155	3.46574	-0.63052	24.2033	0.034618	0.786641	9	27.51	27	0.00010932	0.048196	1	1		1
407	2015	1.97642	1	6.13697	0	0.823771	24.1029	0.035729	1.03821	9	27.51	27	0.00420934	-0.141832	0	1		1
408	2017	4.1448	1	6.06896	0	-0.022758	24.0519	0.012365	1.40434	9	27.51	27	0.00420934	-0.049714	0	1		1
408	2018	3.79634	1	6.2572	3.82864	0.274584	24.1926	0.029182	0.079874	9	27.51	27	0.00421423	0.151121	0	1		1
408	2019	3.76316	1	3.68326	4.04305	-1.47182	22.2447	0.030919	0.129065	11	32.88	30	0.0053523	0.074494	0	1		1
408	2021	10.8695	1	3.70412	4.63473	-0.786439	22.2625	0.009405	0.136593	11		30	0.00535143	0.038654	0	1		1
408	2022	11.0305	1	3.69677	0	-0.338389	22.2562	0.0124	0.135765	12		30	0.00487767	-0.006524	0	1		1
408	2023	14.8752	4	3.74237	0	-0.623472	22.2949	0.014128	0.126417	14		30	0.00416818	0.039448	0	1		4
410	2011	2.88336	1	3.77449	7.85787	1.91499	22.3221	0.028782	0.095499	10	52.85	30	0.00441426	0.027557	0	1		1
410	2012	3.82651	1	3.72708	7.09091	-0.49509	22.282	0.059709	0.458617	11	44.1	30	0.00247573	-0.03935	0	1		1
410	2013	3.18687	1	4.22399	7.28139	-0.71484	22.6971	0.158151	0.316463	10	37.41	30	0.00242933	0.514514	0	1		1
410	2014	6.36686	1	4.34272	8.34427	-0.21533	22.7944	0.153099	0.341127	10	37.41	30	0.00242933	0.147894	0	1		1
410	2015	2.8339	1	4.34053	0	-1.29098	22.7927	0.051193	0.259317	11	35.08	30	0.0024766	-0.011885	0	1		1
410	2016	3.17958	1	4.81866	8.62389	-1.62568	23.1783	0.044642	0.195154	11	35.52	30	0.00234825	0.46783	0	1		1
410	2018	5.02024	1	5.1022	8.95092	-1.14297	23.4023	0.065198	0.182186	11	33.87	30	0.00225978	0.25104	0	1		1
410	2023	8.13245	3	5.05514	8.71654	0.17534	23.3653	0.077878	0.19239	11	32.45	30	0.002199	-0.03627	0	1		3
413	2011	1.32367	1	5.05792	7.90286	-0.672859	23.3675	0.037944	0.183459	11	30.76	30	0.00241861	0.002192	0	1		1
413	2012	1.22037	1	5.09155	0	-0.792877	23.3939	0.02914	0.13561	11	30.76	30	0.00100484	0.026752	0	1		1
413	2013	1.22037	1	5.07076	7.96936	-3.44418	23.3776	0.038741	0.180184	11	30.78	30	0.000697824	-0.014209	0	1		1
413	2014	8.40708	1	5.2125	0	-1.12239	23.4885	0.016415	0.192	10	30.78	30	0.00105865	0.117268	1	1		1
413	2015	8.7915	1	5.29756	10.24	-0.244918	23.5547	0.020149	0.37289	10	30.59	30	0.00115792	0.068393	1	1		1
413	2016	8.77134	1	5.4348	0	-0.755817	23.6608	0.057955	0.298399	9	30.35	30	0.00109654	0.111953	1	1		1
413	2017	12.4458	3	5.47797	0	-1.18252	23.694	0.04663	0.313585	9	30.34	30	0.00119096	0.033785	1	1		3
413	2018	12.9483	1	5.53124	3.04452	-0.532833	23.7349	0.042882	0.325132	9	30.34	30	0.00103412	0.041744	1	1		1
413	2019	12.4969	1	5.76848	0	0.103231	23.9157	0.045171	0.217601	9	27.18	30	0.000280793	0.198209	1	1		1
413	2020	8.52361	1	5.93479	0	-0.769829	24.0412	0.044237	0.266037	9	22.44	30	6.27153e-06	0.133718	1	1		1
413	2021	17.413	3	4.18688	5.95064	-0.308112	22.5671	0.059407	0.466471	4	21.3	27	4.70489e-06	0.878538	0	0		3
413	2022	12.7837	3	4.62506	4.33073	0.462325	22.9265	0.066827	0.441886	13		27	0.000261324	0.440239	0	0		3
420	2011	2.30145	1	5.01812	6.03548	-0.353783	23.2414	0.049698	0.393986	13		27	0.000235975	0.370115	0	0		1
420	2013	4.49612	1	5.3231	4.72739	0.611055	23.4812	0.051703	0.76454	13		27	0.000250789	0.290586	0	0		1
420	2014	4.37932	1	5.68481	6.04501	0.20998	23.7606	0.058076	0.557871	16	60.47	27	0.000145384	0.316838	0	0		1
420	2015	4.08836	1	5.74185	0	-0.518653	23.8042	0.061679	0.387116	14	60.47	27	0.000145384	0.045564	0	1		1
420	2016	3.81463	1	5.97104	5.61313	-0.151351	23.9782	0.036424	0.30317	14	60.47	27	6.54832e-06	0.18999	0	0		1
420	2017	3.25048	1	6.52578	4.82831	-0.17609	24.3913	0.037052	0.380339	14	47.82	27	6.54832e-06	0.520654	0	0		1
420	2018	2.4453	1	6.88412	0	0.107546	24.6525	0.037588	0.342519	14	47.815	27	4.11139e-06	0.296622	0	0		1
420	2019	3.4862	1	7.29635	5.50533	-0.65187	24.9478	0.039444	0.310824	14	47.82	27	4.11139e-06	0.343578	0	1		1
420	2020	3.74942	1	7.59132	0	0.079189	25.1559	0.041312	0.327546	14	47.82	27	5.17786e-06	0.231336	0	1		1
420	2021	5.75247	2	7.9142	5.1299	0.62807	25.3807	0.021288	0.311826	14	53.92	27	4.11139e-06	0.252111	1	1		2
420	2022	5.82987	2	7.94245	0	0.571223	25.4003	-0.024241	0.332723	14	53.92	27	5.48185e-06	0.019723	1	1		2
420	2023	5.04823	2	7.83986	0	-0.69658	25.3292	0.014325	0.264333	14	53.92	27	5.26632e-05	-0.068563	1	1		2
422	2011	12.6581	3	7.92576	0	-1.15303	25.3887	0.025681	0.423424	14	53.92	27	5.26632e-05	0.061298	1	1		3
422	2012	14.9352	4	8.11373	2.07944	-5.68637	25.5182	0.030938	0.330727	13	53.92	27	7.02175e-05	0.138208	1	1		4
422	2013	28.8611	4	8.34566	2.30259	-0.07725	25.6766	-0.00994	0.334511	14	53.92	27	7.02175e-05	0.134655	1	1		4
422	2014	27.7285	4	8.36959	2.30259	1.02428	25.6928	0.037415	0.242338	14	53.92	27	8.09819e-06	0.016389	1	1		4
422	2015	17.8988	1	8.21248	3.04452	-0.263522	25.5858	-0.053725	0.33773	9	40.91	27	1.07976e-05	-0.101495	1	1		1
422	2016	35.642	1	8.3411	0	0.099262	25.6735	0.040911	0.434285	9	40.75	27	0.00017286	0.091622	1	1		1
422	2017	13.4051	2	8.4364	0	-0.365692	25.7381	0.031345	0.514468	9	40.59	27	0.000227709	0.066803	0	1		2
422	2021	6.12133	2	8.60474	0	0.001158	25.8518	0.041691	0.280071	9	41.51	27	1.62275e-05	0.120347	0	1		2
422	2022	25.9285	2	2.9784	1.60944	0.667958	21.5244	0.074969	0.253032	9		27	1.62275e-05	0.303661	0	1		2
422	2023	14.9952	2	2.99778	2.63906	-9.5193	21.5418	0.031212	0.335097	7		27	2.09886e-05	0.020308	0	1		2
423	2011	13.8044	3	2.88643	1.09861	0.601046	21.4416	0.02839	0.327252	9		27	2.09886e-05	-0.095348	0	1		3
423	2012	13.496	3	2.84242	0	2.1665	21.4018	0.05408	0.563471	9	29.86	27	2.09886e-05	-0.039029	1	1		3
423	2013	13.211	2	2.96992	1.38629	-0.037571	21.5168	0.146545	0.911712	9	32.7	27	2.09886e-05	0.09892	1	1		2
423	2014	16.6673	3	3.07874	3.29584	0.082979	21.6141	0.138418	1.1235	9	51.19	27	2.09886e-05	0.102269	1	1		3
423	2015	14.4575	2	2.9938	0	-1.15678	21.5382	0.026761	0.180516	9	49.14	27	2.06077e-05	-0.073131	0	1		2
423	2016	14.7578	2	3.42015	2.19722	-0.442762	21.915	0.029815	0.275302	9	49.14	27	1.49307e-05	0.433672	0	1		2
423	2017	15.0702	1	3.13001	3.21888	-0.685894	21.6598	0.004635	0.12088	9	49.14	27	1.12579e-05	-0.212413	0	1		1
423	2018	15.1146	1	6.04712	1.38629	-0.040594	24.0355	0.023586	0.078763	9	49.14	27	8.53726e-06	7.60906	0	1		1
423	2019	17.7847	2	6.29064	1.60944	0.272125	24.2175	0.02535	0.112926	9	49.14	27	7.17696e-06	0.199644	0	1		2
423	2020	17.1664	2	6.28555	0	0.007119	24.2137	0.014464	0.137782	9	49.14	27	5.74156e-06	-0.017381	0	1		2
423	2021	16.0699	2	6.52614	0	-0.855596	24.3915	0.002436	0.105474	9	49.14	27	7.65542e-06	0.194612	0	1		2
423	2022	15.0298	2	6.5276	2.48491	-0.328253	24.3926	-0.019448	0.1146	9	45.33	27	0.0329728	0.001069	0	1		2
423	2023	19.0055	6	6.57289	0.693147	-0.856888	24.4258	-0.008379	0.137859	9	45.33	27	0.0332333	0.03381	0	1		6
425	2011	11.9885	3	6.53557	1.60944	-0.035196	24.3985	-0.004937	0.163936	9	39.18	27	0.0332333	-0.027019	0	1		3
425	2012	16.4276	3	6.58325	1.60944	0.143625	24.4334	0.005253	0.548314	9	39.18	27	0.033431	0.035604	0	1		3
425	2013	14.8987	2	5.27633	0	13.4162	23.4447	0.04579	0.446636	9	39.18	27	0.033431	-0.707063	0	1		2
425	2014	20.0665	1	5.34211	0	-0.793366	23.496	0.066014	0.397225	9	39.18	27	0.033431	0.052668	0	1		1
425	2015	23.1689	1	5.73531	0	-0.328329	23.7992	0.053799	0.375356	9	36.17	27	0.0332188	0.283906	0	1		1
425	2016	24.3215	2	6.05122	2.19722	-0.366824	24.0386	0.035401	0.555632	9	36.1	27	0.0335897	0.27039	0	1		2
425	2017	14.1661	2	2.44626	2.19722	-0.445594	21.0376	0.041277	0.689864	11	25.22	27	0.0337184	0.874864	0	1		2
425	2018	18.9705	2	2.42987	2.07944	-0.349945	21.0223	0.029393	0.865551	11	25.22	27	0.00093377	0.009594	0	1		2
425	2019	25.5029	2	2.36704	0	-0.569573	20.9635	0.000939	0.301285	11	12.84	27	0.00093377	-0.055903		0		2
425	2020	26.0514	3	2.36135	1.60944	-0.510893	20.9582	0.003913	0.437739	10	12.7	27	0.000754191	-0.005321	0	1		3
425	2021	24.7628	2	2.35228	3.71357	-0.408719	20.9496	0.003876	0.587033	10	11.19	27	0.000407559	-0.006245	0	1		2
425	2022	22.71	2	2.0976	0.693147	0.177872	20.7081	-0.171131	0.646551	10	9.8	27	0.000346307	-0.214605	0	1		2
425	2023	12.7901	2	2.12131	0.693147	-1.66813	20.7308	0.002713	0.497608	11	9.8	27	0.000129842	0.002128	0	1		2
510	2011	4.87261	1	2.08548	6.27099	-0.141291	20.6965	0.011824	1.03383	11	9.8	27	0.000129832	-0.035397	0	1		1
510	2012	4.74382	2	2.23914	3.43399	0.284027	20.8429	0.031201	0.712843	11	9.74	27	3.57752e-05	0.159054	0	1		2
510	2013	2.90651	1	2.32977	3.91202	-0.004019	20.9285	0.033029	0.694349	11	8.79	27	5.82554e-05	0.089332	0	1		1
510	2014	2.68982	1	2.61173	3.49651	0.044716	21.191	0.039217	0.46969	11	7.18	27	0.000500946	0.300179	0	1		1
510	2016	3.72095	1	2.75499	1.09861	0.448365	21.3223	0.023029	0.292536	11	7.19	27	0.000500945	0.140313	0	1		1
510	2017	3.34915	1	2.85399	3.89182	-0.13408	21.4122	0.027426	0.220608	10	7.84	27	0.000506924	0.094121	1	1		1
510	2018	4.42432	2	2.99104	3.2581	0.146853	21.5357	0.028579	0.232607	9	7.82	27	0.000506924	0.131445	1	1		2
510	2019	2.42323	1	3.15495	3.2581	0.830749	21.6819	0.02715	0.173252	9	9.03	27	0.000526933	0.148166	1	1		1
510	2020	3.05399	1	3.63472	3.04452	-0.066216	22.1007	-0.071878	0.176157	9	8.26	27	0.000227126	0.520095	1	1		1
510	2021	5.45178	2	3.85051	3.97029	0.356541	22.2849	0.028812	0.205865	9		27	0.0002185	0.202249	1	1		2
510	2022	12.0432	2	4.09456	2.89037	0.023581	22.4902	0.041229	0.192391	8		27	0.000256833	0.227975	1	1		2
510	2023	4.00243	1	4.34761	0	-0.38521	22.7	0.04177	0.186095	9		27	2.73961e-05	0.233427	1	1		1
513	2011	3.14497	1	4.32561	0	-0.331706	22.6819	0.05181	0.488807	9		27	0.000123597	-0.017948	1	1		1
513	2012	4.00666	1	4.75871	0	-0.391091	23.0344	0.005782	0.361656	8	18.88	27	9.26963e-05	0.422558	1	1		1
513	2013	12.6379	2	6.39823	5.7301	0.116259	24.1487	0.003906	0.252136	17	18.88	22	0.00211742	0.924725	1	1		2
513	2014	13.6866	2	6.36766	6.95368	-1.13718	24.1258	-0.057033	0.235736	13	18.88	22	0.00211742	-0.022579	1	1		2
513	2015	14.4102	1	5.95276	0	-0.04883	23.8125	-0.169445	0.208825	11	14.75	22	0.0025551	-0.268959	1	1		1
513	2016	15.4071	2	6.0244	0	-0.028872	23.8671	0.018994	0.298532	10	14.75	22	0.0025551	0.1226	1	0		2
513	2017	14.593	1	6.37624	6.9489	0.664147	24.1322	0.02327	0.525892	11	14.75	22	0.00191863	0.303621	1	1		1
513	2018	16.3415	2	7.15349	5.61677	-0.190514	24.7025	0.008834	0.326637	11	14.75	22	0.00139843	0.768779	1	1		2
513	2019	14.2883	1	7.60892	7.15696	1.02787	25.0275	0.022577	0.220268	8	14.75	22	0.00139843	0.384013	1	1		1
513	2020	16.8848	3	7.71471	0	0.950444	25.1021	0.01596	0.254138	8	14.75	22	0.00139843	0.077424	1	1		3
513	2021	18.9966	4	7.68475	5.45959	1.18718	25.081	0.036945	0.220673	9	14.75	22	0.00104882	-0.020869	0	1		4
513	2022	19.628	5	7.93245	0	2.8418	25.2545	0.045574	0.237272	9	7.64	22	0.0010484	0.1895	0	0		5
513	2023	12.2862	4	8.19943	7.22475	1.111	25.4396	0.028903	0.353909	12	11.48	22	0.0010484	0.203258	0	0		4
518	2011	3.48489	1	8.60173	5.14166	0.64692	25.7146	0.014528	0.322241	12	11.48	22	0.0010484	0.316603	0	0		1
518	2012	5.58955	1	8.72833	0	6.2962	25.8003	0.022114	0.326026	12	11.48	22	0.0010953	0.089422	0	0		1
518	2013	5.02174	1	9.00312	0	3.8481	25.9847	0.021089	0.40963	12	11.3	22	0.000992348	0.202565	0	0		1
518	2014	2.61013	1	8.76985	7.22475	1.23422	25.8283	0.022189	0.256397	9	11.3	22	4.52524e-05	-0.144835	0	1		1
518	2015	1.22037	1	9.4428	7.33824	0.695591	26.2759	0.01964	0.372395	10	11.48	22	4.52524e-05	0.564551	0	1		1
518	2016	1.22037	1	9.71809	4.57471	0.446624	26.4557	0.048453	4.18433	11	11.48	22	4.20558e-05	0.197066	0	0		1
518	2017	1.22037	1	1.64734	0	0.142729	20.2688	0.041383	1.20082	2		27	0.000343328	3.71497	1	0		1
518	2018	1.22037	1	1.75979	0	-0.373046	20.38	0.034909	0.791504	7		27	0.000254119	0.112856	1	0		1
518	2019	1.22037	1	1.72333	7.34343	-0.903112	20.3441	0.03773	0.36897	9		27	0.000305096	-0.035321	0	0		1
518	2020	2.63895	1	1.7984	0	-0.964199	20.418	0.024589	0.42184	10		27	0.000284705	0.076711	0	0		1
518	2021	2.18578	1	1.99911	7.42118	-1.55854	20.6134	0.011211	0.324956	9	49.83	27	0.000305096	0.215758	0	0		1
518	2022	2.90165	1	2.20643	0	-1.08976	20.8119	0.008489	0.183242	9	49.83	27	0.000510841	0.219599	0	0		1
518	2023	3.46726	1	2.18004	0	-1.15677	20.7868	0.020784	0.133304	9	49.83	27	9.61112e-06	-0.024776	0	0		1
519	2011	2.31258	1	2.20252	4.98361	-0.732937	20.8082	0.00541	0.215863	7	41.86	27	1.92229e-05	0.010413	0	0		1
519	2012	1.87865	1	2.2746	7.42118	-0.731823	20.8765	0.013039	0.236092	9	41.8614	27	7.20818e-06	0.070674	0	0		1
519	2017	10.8575	1	2.31029	7.80751	-0.557646	20.9101	0.019666	0.20129	7	41.86	27	1.92229e-05	0.034248	0	0		1
519	2018	4.65584	1	2.37062	0	-0.509325	20.9669	0.031726	0.104487	9	24.99	27	0.00026316	0.058365	0	0		1
519	2019	3.1184	1	2.40552	6.18415	-1.06983	20.9996	0.007528	0.107476	9	16.77	27	0.000200672	0.033232	0	0		1
519	2020	4.30509	2	2.50812	8.09316	-3.82304	21.0952	0.012473	0.471597	9	18.53	27	0.000454185	0.095283	0	0		2
519	2021	5.96107	2	2.84807	0	-0.881941	21.4069	0.013724	0.178866	9	18.53	27	0.000454185	0.365764	0	0		2
519	2022	4.6456	2	2.98313	6.68586	-5.29113	21.5286	0.018376	0.164231	9	18.53	27	0.0009215	0.087151	0	0		2
519	2023	5.04768	2	3.01641	2.30259	-0.494688	21.5585	0.01365	0.111511	9	18.53	27	0.00104418	0.030278	0	0		2
521	2011	12.6441	2	3.10294	2.56495	-1.26151	21.6357	0.018355	0.137634	9	18.08	27	0.0012267	0.067292		0		2
521	2012	16.5675	4	3.22207	2.94444	-0.748058	21.7413	0.023611	0.161596	9	18.08	27	0.0012267	0.111365	0	1		4
521	2013	18.2092	4	3.31667	0	-0.593882	21.8245	0.020182	0.125481	9	17.78	27	0.0011702	0.086816	0	1		4
521	2014	16.8589	4	3.50982	0	-0.226384	21.9929	0.022646	0.122399	8	17.74	27	0.00109133	0.183383	0	1		4
521	2015	17.9133	3	3.53442	3.2581	0.289054	22.0142	0.028078	0.122149	9	17.59	27	0.00114068	0.021517	0	1		3
521	2016	20.2655	3	3.59042	0	-1.32101	22.0626	0.028684	4.7715	9	17.45	27	0.00106248	0.049536	0	1		3
521	2017	21.838	3	2.14045	0	-1.63243	20.6724	0.055623	3.10659	9	18.2	25	0.000601009	2.16331	0	1		3
521	2018	18.6289	2	2.25445	0	-1.29021	20.7815	0.099144	1.02199	8		25	0.00069878	0.119042	0	1		2
521	2019	22.6533	2	2.60412	0	-0.330974	21.11	0.105289	0.322664	10		25	0.000569823	0.388924	0	1		2
521	2020	20.9286	2	3.23059	3.73767	0.885773	21.678	0.089075	0.267544	12		25	0.000668608	0.764792	0	1		2
521	2021	24.1988	3	3.59677	0	-1.98484	21.9989	0.105823	0.273325	11	62.44	25	0.000473197	0.37836	0	1		3
521	2022	23.853	3	3.77454	0	3.29731	22.152	0.07415	0.330285	11	62.44	25	0.000555805	0.165396	1	1		3
521	2023	12.1827	3	4.0669	0.693147	-72.8358	22.4	0.090175	0.236333	6	62.44	25	0.000248317	0.281488	0	1		3
523	2011	12.3129	3	4.63184	0	1.57504	22.8671	0.156008	0.25918	7	40.77	25	0.000248317	0.589558	0	1		3
523	2012	13.5497	3	5.89519	0	0.938572	23.8601	0.0692	0.1783	7	36.69	25	9.32076e-05	1.69929	0	1		3
523	2013	15.9925	3	6.41054	0	-0.200541	24.2471	0.071321	0.722001	7	36.69	25	0.000264926	0.466766	0	1		3
523	2014	16.2596	3	7.26189	3.2581	-1.60139	24.8663	0.07283	0.600427	7	36.69	25	0.000285307	0.85747		1		3
523	2015	16.8048	3	7.44167	0	-0.433962	24.9941	0.114182	0.57769	7	36.69	25	0.000262605	0.134749	0	1		3
523	2016	16.8621	3	7.75094	2.89037	-0.856705	25.2116	0.084619	0.504415	7	36.69	25	0.000253079	0.242977	0	0		3
523	2017	18.9627	4	7.75996	3.63759	-0.57593	25.2179	0.044137	0.573318	7	36.69	25	0.000219908	0.006324		0		4
523	2018	17.1058	4	7.826	0	-0.310128	25.264	0.006697	0.380575	7	36.69	25	0.000188982	0.04714	0	0		4
523	2019	16.6753	4	7.82547	2.94444	0.029916	25.2636	0.000973	0.244418	6	36.69	25	0.000188983	-0.000373	0	0		4
523	2022	7.80429	2	7.75361	2.63906	-1.35626	25.2135	-0.01015	0.292117	7	37.45	25	0.000301529	-0.048889	0	0		2
523	2023	5.72491	3	7.65422	3.29584	-0.190862	25.1439	0.015009	0.220911	7	26.51	25	0.000222517	-0.067219	0	0		3
525	2011	4.42113	1	7.82138	3.80666	-1.70901	25.2608	0.020936	0.146696	7	26.51	25	0.000275892	0.123965	0	0		1
525	2012	6.33698	3	7.7999	0	-0.204278	25.2458	0.046434	0.214838	7	68.71	25	0.000251522	-0.014858	0	0		3
525	2013	6.86892	3	8.13702	2.3979	0.307714	25.4792	0.063257	0.265547	7	68.71	25	0.000251522	0.262924	0	1		3
525	2014	34.391	3	8.20723	2.07944	4.33929	25.5274	0.052337	0.672054	7	57.26	25	0.000271036	0.049393	0	1		3
525	2015	36.9914	3	2.77543	1.09861	5.30196	21.3044	0.060503	0.520871	15	57.25	26	0.000323647	0.439367	0	1		3
525	2016	13.3938	1	2.8473	1.09861	85.228	21.3699	0.055178	1.13519	15	35.49	26	0.000277849	0.07156	0	0		1
525	2017	15.449	1	3.19019	1.09861	0.596512	21.6777	0.031961	0.565758	15	35.49	26	0.000291519	0.360407	0	0		1
525	2018	15.7631	2	3.3923	1.09861	-0.809552	21.8558	0.026403	0.356109	12	35.07	26	0.000298638	0.177003	0	0		2
525	2019	17.128	3	3.44803	2.07944	-0.890713	21.9045	-0.014279	0.187696	12	34.75	26	0.000219005	0.049893	0	1		3
525	2020	18.2056	4	3.52985	1.38629	0.809628	21.9756	0.008461	0.346276	12	33.71	26	0.000269327	0.073743	0	0		4
528	2011	14.1849	3	3.47136	1.38629	-2.05643	21.9248	0.056211	0.287503	12	33.2	26	0.000269327	-0.049511	0	1		3
528	2012	11.6188	2	3.40759	2.3979	-0.276822	21.8691	0.04646	0.172731	5	31.73	26	0.000292095	-0.060191	0	1		2
528	2013	12.818	2	3.62955	0	-0.20847	22.0618	0.043756	0.332548	9	30.86	26	0.000183956	0.212482	0	1		2
528	2014	20.6353	3	3.64796	0	1.93386	22.0777	0.023398	0.416873	8	24.23	26	0.000187828	0.015986	0	1		3
528	2015	15.879	3	3.60778	0	-1.37228	22.043	0.01913	0.54679	7	24.19	26	6.03773e-05	-0.034048	0	0		3
528	2016	18.678	3	3.52458	0	0.240746	21.971	0.030952	0.628562	9	24.23	26	0.000189978	-0.06946	0	1		3
528	2017	18.7521	2	3.55731	0	-3.77474	21.9994	0.044544	0.850786	9	24.15	26	0.000142485	0.028776		1		2
528	2018	16.0156	2	3.58408	0	-2.74689	22.0226	0.090166	0.903505	8	24.16	26	0.000126623	0.023425	1	1		2
528	2019	16.3503	2	3.68124	0	64.2074	22.1063	0.05637	0.638754	7	24.3	26	0.000126624	0.087324	0	1		2
528	2020	21.2209	4	3.79845	5.0814	2.7737	22.2066	0.037859	0.401705	7	24.22	26	0.000126624	0.105513	0	1		4
528	2021	18.9943	3	3.93938	0	1.1749	22.3262	0.029632	1.65538	7	24.22	26	0.000126624	0.127097	0	1		3
528	2022	23.6131	2	3.80051	3.49651	1.72055	22.2083	0.051641	0.234886	6	24.23	26	0.000113353	-0.111203	0	1		2
528	2023	13.6473	2	5.78726	0	-0.613104	23.8083	0.038712	0.333009	7	24.22	26	0.000113353	0.620161	0	1		2
530	2011	2.13142	1	6.41469	4.59512	1.17582	24.2798	0.046006	0.699035	7	24.23	26	0.000867276	0.182624	0	1		1
530	2012	2.36142	1	7.22051	4.30407	-0.295269	24.8653	0.004969	0.243213	7	24.23	26	0.0022135	0.795935	0	1		1
530	2013	2.52671	1	8.2822	4.84419	0.597989	25.6061	0.038531	0.295934	7	24.43	26	0.00226786	0.584049	0	1		1
530	2014	3.29726	1	7.91406	4.44265	5.83626	25.2974	0.085589	0.072081	14	24.43	24	0.00234587	0.104968	0	1		1
530	2015	5.53173	2	8.22646	4.95583	2.31126	25.5132	0.096817	0.072042	13	22.22	24	0.00228964	0.240815	0	1		2
530	2016	12.1474	1	8.32671	4.59512	0.731376	25.5819	0.105747	0.140314	12		24	0.00229	0.071076	0	1		1
530	2017	16.872	3	8.74084	5.94017	0.90465	25.8626	0.092977	0.183318	10		24	0.00229014	0.324109	0	1		3
530	2018	19.6452	1	9.30387	4.89784	0.643972	26.2371	0.075013	0.137849	10		24	0.00229025	0.454313	0	1		1
530	2019	12.6829	1	9.39665	1.79176	-7.34051	26.2981	0.082102	0.210935	9	45.64	24	0.00229043	0.062853	0	1		1
530	2020	4.75903	1	9.60397	4.20469	-17.2232	26.4335	0.083712	0.127876	8	45.64	24	0.00507287	0.145067	0	1		1
530	2021	5.18285	1	9.87706	4.61512	2.16506	26.6104	0.076326	0.214785	8	30.2	24	0.00466553	0.193496	0	1		1
530	2022	10.4106	1	5.98003	3.13549	0.621885	23.8333	0.124788	0.20074	18	30.2	22	0.00764592	0.307409	0	1		1
530	2023	11.3904	2	6.3328	3.97029	-1.3057	24.0998	0.082405	0.218932	17	29.9	22	0.00479748	0.305275		1		2
533	2011	1.22037	1	6.61933	0.693147	1.0172	24.3128	0.108993	0.358951	18	29.9	22	0.0047997	0.237477	0	1		1
533	2012	3.20782	2	7.11889	0	-1.39937	24.6776	0.153358	0.452766	18	29.9	22	0.00490302	0.440158	0	1		2
533	2013	4.53125	2	7.34926	0	-0.471074	24.843	0.10269	0.589336	18	29.9	22	0.00490482	0.171893	0	1		2
533	2014	4.21852	2	7.45409	0	-0.649729	24.9178	0.048767	0.566481	18	19.38	22	0.00500828	0.077599	0	1		2
533	2015	11.5149	1	7.69275	0	-0.499672	25.0866	0.048619	0.426438	18	19.38	22	0.00500985	0.183977	0	1		1
533	2016	11.9247	2	8.30791	0	-0.772398	25.5142	0.048039	0.527072	18	19.38	22	0.00489088	0.533482	0	1		2
533	2017	11.0214	1	8.23939	4.30407	-0.872578	25.4671	0.018827	0.366204	13	41.02	22	0.00473676	-0.060383	0	1		1
533	2018	12.842	2	8.76214	6.59715	1.4155	25.8231	0.02193	0.334566	13	40.95	22	0.00467027	0.41566	0	1		2
533	2019	11.5476	1	8.97865	6.65544	-0.906263	25.9684	0.048399	0.387961	14	41.28	22	0.00458066	0.15961	0	1		1
533	2020	11.4952	1	9.09748	4.84419	-0.37321	26.0476	0.056635	0.399385	15	41.28	22	0.00431074	0.082463	0	1		1
533	2021	12.2797	1	9.31329	6.78333	-0.200427	26.1906	0.050276	0.426263	15	41.28	22	0.00383698	0.153721	0	1		1
533	2022	12.9821	1	9.5169	4.7362	0.150688	26.3245	0.041643	0.564506	15	43.26	22	0.0034257	0.143218	0	1		1
533	2023	5.60542	1	9.55201	0	0.699692	26.3474	0.041733	0.412549	15	43.26	22	0.00336445	0.022072	0	1		1
534	2019	11.3105	1	2.74139	1.38629	0.431807	21.4551	0.100065	0.483411	9		31	0.00342879	0.141106	0	1		1
534	2020	11.3447	1	2.9829	0	-4.73177	21.6712	0.066323	0.430258	9		31	0.00275235	0.27546	0	1		1
534	2021	12.0939	1	3.05303	1.09861	0.2452	21.7333	0.057647	0.305711	11		31	0.00335835	0.064065	0	1		1
534	2022	12.1813	1	3.18863	1.09861	1.03575	21.8526	0.064888	0.158408	9		31	0.00277593	0.126642	0	1		1
534	2023	4.66088	1	3.38586	2.83321	-0.667107	22.0241	0.048054	0.163831	9	68.71	31	0.00277602	0.187142	0	1		1
536	2011	11.2773	2	3.48139	1.38629	0.409208	22.1064	0.040354	0.323805	9	62.93	31	0.00277634	0.08579	0	1		2
536	2012	10.0928	2	3.64941	1.09861	-2.52451	22.25	0.038851	0.42999	9	62.93	31	0.00240559	0.154386	0	1		2
536	2013	9.53288	2	3.66225	2.94444	-339.701	22.2609	0.035273	0.403807	9	52.82	31	0.00246104	-0.0134	0	1		2
536	2014	9.61313	2	3.68397	2.63906	-0.754957	22.2793	0.021695	0.294495	9	51.37	31	0.00246111	0.01861	0	1		2
536	2015	10.316	1	3.64993	0	0.310039	22.2504	0.050058	0.393507	9	40.78	31	0.000715909	-0.028494	0	1		1
536	2016	12.6157	3	3.9143	3.09104	1.53672	22.4733	0.042959	0.362601	9	40.78	31	0.00044189	0.249681	0	1		3
536	2017	4.59435	2	4.1625	2.56495	0.214218	22.6794	0.043015	0.176987	9	41.42	31	0.00050593	0.228813	0	1		2
536	2018	10.8097	1	4.1372	0	0.493738	22.6585	0.082237	0.309779	9	37.28	31	0.000501791	-0.020652	0	1		1
536	2019	25.5234	2	4.35661	4.15888	1.16662	22.8384	0.092894	0.189476	8	38.63	31	0.000151977	0.197146	0	1		2
536	2021	26.2191	3	4.68314	2.89037	1.79919	23.1021	0.119463	0.164847	9	38.63	31	0.000151977	0.039033	0	0		3
536	2022	19.224	3	4.86639	4.70048	1.05789	23.248	0.064534	0.281926	9	38.63	31	4.76343e-06	0.157071	0	1		3
536	2023	11.8402	3	5.03835	6.68586	0.647961	23.3836	0.065764	0.171821	9	37.48	31	2.60069e-06	0.145227	0	1		3
538	2011	15.0475	2	5.12532	4.62497	0.410513	23.4517	0.044536	0.148422	9	30	31	0.00265368	0.070477	0	1		2
538	2012	12.2575	1	5.06273	0	0.408412	23.4027	0.018777	0.197638	9	30	31	0.00151515	-0.047804	0	1		1
538	2013	12.3896	1	5.10688	0	0.03922	23.4373	0.032768	0.235894	9	30	31	0.001443	0.035174	0	1		1
538	2014	14.9359	2	5.24513	2.48491	-0.038001	23.545	0.047758	0.41121	9	30	31	0.00126497	0.049167	0	1		2
538	2015	13.3175	1	5.30966	0.693147	0.420109	23.595	0.048512	0.111057	9	30	31	3.8782e-05	0.051297	0	1		1
538	2016	14.2989	2	2.86349	1.79176	0.311926	21.529	0.041618	0.6849	14	44.34	30	2.90856e-05	0.096118	0	1		2
538	2017	16.6631	3	3.13331	2.3979	0.519238	21.7688	0.04121	0.24931	14		30	2.90856e-05	0.279655	0	1		3
538	2018	13.9358	2	3.3155	0	1.3725	21.9284	0.03196	0.235328	9		30	2.18151e-05	0.172974	0	1		2
538	2019	15.1474	2	3.70897	0	1.38631	22.2666	0.032248	0.258791	9		30	2.18151e-05	0.326659	0	1		2
538	2020	14.0931	1	3.89318	2.56495	-37.718	22.4221	0.026527	0.17007	9	38.11	30	1.63596e-05	0.151363	0	1		1
538	2021	20.2272	6	4.11646	0	0.844044	22.6083	0.020788	0.236723	9	38.11	30	1.22679e-05	0.095435	0	1		6
538	2022	25.0751	6	4.12493	2.30259	0.110969	22.6153	0.032946	0.255393	9	38.11	30	9.20009e-06	0.007041	0	1		6
538	2023	13.5957	6	4.49597	0	-0.214263	22.9192	0.046827	0.575054	9	27.49	30	6.8992e-06	0.324978		1		6
541	2011	22.2389	4	4.93138	0	-0.471365	23.2678	0.040972	0.353686	9	27.49	30	5.48214e-06	0.551331	0	1		4
541	2012	14.236	4	5.61208	0	-5.77098	23.7968	0.04924	0.328711	9	27.31	30	4.64348e-06	0.697228	0	1		4
541	2013	14.5923	3	6.05704	0	-1.70569	24.1328	0.051847	0.218836	9		30	4.64348e-06	0.395909	0	1		3
541	2014	15.4416	3	6.36714	0	0.38603	24.3628	0.04154	0.236086	9		30	7.27121e-06	0.258589	0	1		3
541	2015	13.5029	3	6.48457	0	-0.947406	24.4491	0.003325	0.175466	9		30	7.27121e-06	0.090054	0	1		3
541	2016	13.0689	3	6.53597	0	-0.689196	24.4867	0.004611	0.138669	9	40.67	30	7.26959e-06	0.038314	0	1		3
541	2017	15.2859	3	6.56616	0	0.565707	24.5087	-0.006299	0.085098	9	40.67	30	7.31471e-06	0.022278	0	1		3
541	2018	20.0326	4	6.47722	0	-0.087145	24.4437	-0.05209	0.121495	8	40.67	30	7.31471e-06	-0.062946	0	1		4
541	2019	20.806	4	6.48378	0	-0.430648	24.4485	-0.00057	0.155001	9	32.69	30	5.48603e-06	-0.000636	0	1		4
541	2020	19.3849	2	6.46903	3.97029	0.768259	24.4377	0.003196	0.273762	9	29.92	30	5.48603e-06	-0.010746		1		2
541	2021	15.3475	3	7.03943	1.09861	-10.029	24.8503	0.041289	0.255163	9	29.92	30	5.48603e-06	0.072525	0	1		3
541	2022	17.2691	3	7.0107	0.693147	-1.61806	24.8298	0.080757	0.406775	8	29.92	30	5.48603e-06	-0.158903	0	1		3
541	2023	18.9861	5	6.96899	1.09861	0.088651	24.7999	0.087937	0.516039	7	29.92	30	0.000434783	-0.02941		1		5
545	2013	4.93068	1	7.00139	1.09861	-0.027036	24.8231	0.069315	0.375434	9	29.92	30	0.000477498	0.023464	0	1		1
545	2014	3.02801	2	2.12636	1.38629	-0.089571	20.8876	0.10103	0.403284	7	29.92	31	2.44435e-05	0.226728	0	1		2
545	2015	12.5376	2	2.29351	0	2.40829	21.0444	0.073857	0.483492	9	28.81	31	2.34034e-05	0.179694	0	1		2
545	2016	12.6527	2	2.41597	1.94591	0.364234	21.158	0.030648	0.217231	11	28.81	31	1.85909e-05	0.120336	0	1		2
545	2017	13.5259	2	2.82487	1.60944	0.126608	21.5302	0.013432	0.027256	9	28.81	31	1.42015e-05	0.45093	0	1		2
545	2018	13.3362	2	2.76084	0.693147	-0.449681	21.4726	-0.107369	0.231607	8	28.81	31	1.42015e-05	-0.055956	0	1		2
545	2019	13.34	2	2.74336	2.07944	-0.419539	21.4569	-0.278157	0.25211	8	28.95	31	1.42015e-05	-0.041494	0	1		2
545	2020	14.5686	2	2.24498	1.09861	-0.459798	20.999	0.056878	0.155504	6	29.98	31	1.42015e-05	-0.002289	0	1		2
545	2021	13.5293	2	2.20712	0.693147	-0.522897	20.9636	0.124121	0.229756	7	30.6	31	1.09112e-05	-0.036357	0	1		2
545	2022	13.4416	2	2.48938	2.19722	-0.085795	21.2256	0.110542	0.85925	7	30.6	31	1.09112e-05	0.299593	0	1		2
545	2023	6.97352	2	1.62584	2.3979	-1.7454	20.3663	0.047853	0.351332	8	30.6	30	9.35441e-06	0.203315	0	1		2
547	2011	3.9107	2	2.13634	3.4012	0.005664	20.8592	0.001024	0.215562	8		30	9.35441e-06	0.301388	0	1		2
547	2012	2.26051	1	2.53104	1.09861	0.357466	21.2271	0.002754	0.193727	5		30	9.35441e-06	0.453973	0	1		1
547	2013	2.74082	1	2.50404	0	-2.79996	21.2023	-0.071716	0.116585	9		30	9.35441e-06	-0.024526	0	1		1
547	2014	1.69895	1	2.58807	0	-0.028647	21.2794	0.00841	0.208267	9	28.42	30	2.07747e-06	0.080168	0	1		1
547	2015	6.68125	1	2.61692	0	1.54013	21.3058	-0.074436	0.147469	9	28.42	30	2.31001e-07	0.027337	0	1		1
547	2016	7.30611	1	2.78296	0	0.328089	21.4565	0.015099	0.291316	8	28.42	30	2.31001e-07	0.162659	0	1		1
547	2017	9.01404	2	2.94599	5.23644	-0.225578	21.6028	0.021762	0.207678	4	21.48	30	0.010002	0.148213	0	1		2
547	2018	8.52455	1	2.78135	5.39363	0.177644	21.455	0.035195	0.115825	9	19.69	30	0.010002	-0.137332	0	1		1
547	2019	9.61713	1	3.07215	3.49651	-0.956579	21.7149	0.063568	0.153679	9	19.69	30	0.0097941	0.296679	0	1		1
547	2020	10.1392	1	3.40034	1.94591	-0.401502	22.002	0.021469	0.155416	9	19.69	30	0.00983533	0.215531	0	1		1
547	2021	18.5917	2	3.58659	3.13549	0.05504	22.1623	0.017076	0.273067	9	43.08	30	0.00917185	0.173834	0	1		2
547	2022	20.3286	3	3.72124	2.30259	-2.8315	22.277	0.036621	0.296883	9	43.08	30	0.00917185	0.121546	0	1		3
547	2023	13.5042	3	4.07531	1.38629	-13.6465	22.5741	0.039853	0.224803	9	43.08	30	0.0104636	0.346004	0	1		3
550	2011	15.8705	3	4.11979	2.83321	-0.433822	22.611	0.043844	0.415403	9	40.79	30	0.00529639	0.037565	0	1		3
550	2012	15.9052	3	4.18503	0	0.234404	22.665	0.047574	0.295408	9		30	0.0067223	0.055411		1		3
550	2013	12.141	1	4.36842	1.38629	0.649347	22.8154	0.048845	0.417052	9		30	0.0067223	0.162397	0	1		1
550	2014	15.5056	2	4.6254	2.99573	0.563276	23.0237	0.021256	0.481671	8		30	0.0033895	0.231497	0	1		2
550	2015	17.1434	2	4.63974	1.09861	1.54643	23.0352	0.016226	0.377767	9	54.42	30	0.00157539	0.011599	0	1		2
550	2016	19.392	3	4.65865	1.09861	0.04312	23.0504	0.009759	0.51357	9	54.42	30	0.0395717	0.015307	0	1		3
550	2017	23.3287	3	4.73996	3.04452	-0.307079	23.1155	0.016611	0.092778	8	54.42	30	0.000891832	0.06732	0	1		3
550	2018	24.8478	2	1.2	1.94591	-0.422898		0.024691	0.457107	9	41.77	30	0.000927118	0.072599	0	1		2
550	2019	22.18	1	1.75211	0	-0.688806	20.4118	0.041535	0.434227	11	42.09	28	0.00145455	0.016594	0	1		1
550	2020	22.5432	1	1.93738	3.21888	-0.300291	20.5924	0.020622	0.609137	9	42.09	28	0.00121212	0.199956	0	1		1
550	2021	29.6962	2	2.03128	4.2485	-0.896232	20.6828	0.011635	0.314926	9	42.23	28	0.00153347	0.094699	0	1		2
550	2022	27.9839	2	2.23887	2.99573	-2.63015	20.8805	0.009355	0.019962	8	42.27	28	0.00143214	0.21855	0	1		2
550	2023	20.9815	2	2.14966	4.21951	5.36192	20.7959	-0.034466	0.022486	7	42.34	28	0.00143214	-0.080179	0	1		2
553	2011	3.2588	1	2.22605	2.3979	6.59204	20.8684	-0.089589	0.006961	7	42.35	28	0.00143214	0.075126	0	1		1
553	2012	5.04513	2	1.26853	5.2832	1.4869	19.9271	0.010731	0.000788	9	33.08	28	0.000376944	0.054126	0	1		2
553	2013	5.67859	2	1.5113	5.57973	12.0712	20.173	0.028455	0.003095	9	30.09	28	0.000376944	0.27877	0	0		2
553	2014	6.05563	3	1.28019	4.09434	0.81721	19.939	-0.12142	0.717203	8	30.12	28	0.000376944	-0.208606	0	1		3
553	2015	13.531	3	1.29603	5.86079	0.666644	19.9552	-0.130595	0.031433	8	30.13	28	0.000282709	0.016322	0	1		3
553	2016	12.884	2	4.39317	4.38203	1.17862	22.7703	0.157134	0.048127	9	30.13	28	0.000283463	0.052156	1	0		2
553	2017	13.0177	3	4.62943	0	0.70655	22.9624	0.090584	0.717111	9		28	9.4487e-05	0.211868	1	0		3
553	2018	11.7063	1	4.66304	2.30259	-0.790193	22.9896	0.031965	0.025923	9		28	9.4487e-05	0.082873		1		1
553	2019	12.1759	2	4.78358	2.70805	3.03506	23.0864	0.134344	0.018719	9		28	0.000125983	0.224356	0	1		2
553	2020	11.8022	2	3.10123	2.70805	0.13581	21.7758	0.005273	0.018933	7	60.16	31	0.000125983	-0.014881	0	0		2
553	2021	12.9755	3	3.43534	2.48491	1.14994	22.0668	0.003781	0.041176	5	60.16	31	1.12889e-05	0.086321	1	1		3
553	2022	14.2952	4	3.47688	3.13549	2.50977	22.1025	-0.000291	0.11991	7	60.16	31	8.46652e-06	0.07055	0	1		4
553	2023	35.1203	6	3.50231	1.38629	-0.695363	22.1244	0.002181	0.171408	9	55.17	31	6.34989e-06	0.022073	0	1		6
559	2011	1.22037	1	3.62717	1.38629	0.231857	22.2311	0.013768	0.169667	9	51.74	31	4.76256e-06	0.112594	0	1		1
559	2012	3.56516	3	3.81033	1.09861	-0.032752	22.3861	0.023003	0.125647	9	47.64	31	6.34989e-06	0.167675	0	1		3
559	2013	3.51623	3	3.86561	0.693147	0.068543	22.4325	0.026223	0.016407	8	28.93	31	4.76256e-06	0.047542	0	1		3
559	2014	2.20899	2	4.20539	1.38629	-0.305239	22.7147	0.01001	0.044187	9	28.93	31	4.84526e-06	0.314227	1	1		2
559	2015	2.96988	2	4.50188	2.07944	0.016004	22.9563	0.004536	0.054994	9	28.93	31	2.23848e-06	0.165215	1	1		2
559	2016	3.75683	2	4.45159	1.09861	-0.233962	22.9156	0.005873	0.103696	9	14.4	31	2.20028e-06	-0.039883	1	1		2
559	2017	4.72651	2	4.64681	2.70805	-0.219505	23.073	0.013311	0.040985	9	14.65	31	2.01525e-06	0.157158	1	1		2
559	2018	13.1333	2	4.85298	1.60944	-0.180815	23.2374	0.00891	0.104587	9	21.64	31	1.32137e-05	0.178636	1	1		2
559	2019	14.7002	3	4.92912	0.693147	-0.890655	23.2976	0.002579	0.058655	11	11.32	31	1.32137e-05	0.06209	0	1		3
559	2020	14.6222	3	5.2115	1.79176	-0.326339	23.5189	0.002098	0.055343	9	15.9	31	2.01525e-06	0.247682	0	1		3
559	2021	13.1379	2	5.47999	1.09861	-0.045932	23.7263	0.001096	0.022362	9	15.97	31	2.01525e-06	0.230473	0	1		2
559	2022	17.7809	2	5.61222	2.56495	-0.404898	23.8274	-0.028707	0.001798	9	15.97	31	2.68692e-06	0.1064	0	1		2
559	2023	7.27925	2	5.75266	1.79176	-0.220282	23.934	-0.057965	0.01931	9	15.97	31	2.01525e-06	0.112552	0	1		2
561	2011	2.24502	1	5.49584	1.38629	-1.06879	23.7384	-0.042373	0.082147	7		31	0.0017743	-0.04756	0	1		1
561	2012	3.93724	1	2.42562	2.70805	-0.438432	21.2038	0.061877	0.018079	10		32	0.0017962	-0.209549	0	1		1
561	2013	3.77244	1	2.37171	0	-23.0809	21.1541	0.03001	0.023699	10		32	0.0017962	-0.0485	0	1		1
561	2014	3.76676	1	2.34833	0	6.41132	21.1324	0.022077	0.065905	12	38.94	32	0.000260887	-0.021392	0	1		1
561	2015	5.14414	1	2.27935	0.693147	-61.7015	21.0684	0.018279	0.009211	9	38.94	32	0.000193915	-0.062003	0	1		1
561	2016	5.52336	1	2.22672	1.60944	-0.575146	21.0194	0.023628	0.128873	7	38.94	32	0.000162412	-0.047875	0	1		1
561	2017	9.67987	1	1.73134	0.693147	-2.61589	20.5478	-0.527987	0.038652	7	23.84	32	0.00015987	-0.376005	1	1		1
561	2018	6.41249	1	0.998632	2.83321	-0.077375	19.814	-0.23655	0.07495	7	20.74	32	9.95945e-05	-0.519906	1	0		1
561	2019	6.25194	1	1.00717	1.60944	-30.9645	19.8228	0.012052	0.138784	7	20.74	32	4.64219e-06	-0.064605	1	0		1
561	2020	15.1021	1	0.901519	0.693147	-5.80702	19.7131	-0.090024	0.153287	7	20.74	32	3.07208e-06	-0.103901	0	0		1
561	2021	10.7155	2	0.929347	2.89037	-17.5015	19.7421	0.010845	2.98766	7	21.26	32	3.07161e-06	0.029424	0	1		2
561	2022	13.9278	2	0.92739	0	-1.91553	19.7401	0.032438	1.25928	7	21.26	32	0.00278398	-0.002034	0	1		2
561	2023	9.65381	2	2.69221	1.79176	-2.1178	21.4468	0.116907	1.787	7	21.26	32	0.00244409	4.51094		1		2
565	2011	10.8644	3	4.42212	2.83321	-0.538017	22.9241	0.045339	2.74793	7	11.22	32	0.00094279	3.38131	0	1		3
565	2012	6.4002	4	4.82445	2.07944	-0.494315	23.2464	0.072919	1.2105	7	11.22	32	0.000886894	0.380294	0	1		4
565	2013	5.05348	2	5.91123	1.38629	-2.89976	24.0836	0.048354	0.548466	7	14.5	32	0.00118267	0.557674	0	1		2
565	2014	4.01952	2	6.56996	2.99573	-2.30687	24.5697	0.027987	0.014613	7	15.59	32	0.00118267	0.625992	0	1		2
565	2015	6.70873	2	7.08271	3.3673	-5.94215	24.9381	0.028646	0.031702	6	16.14	32	0.000829365	0.345931	0	1		2
565	2016	6.43311	2	7.18117	0	-9.25171	25.0079	0.031261	0.165602	7	16.25	32	0.000762711	0.057786		1		2
565	2017	7.95072	3	7.08431	1.38629	8.96801	24.9392	-0.022995	0.141171	7	16.25	32	2.9508e-05	-0.066353	0	1		3
565	2018	7.91681	3	7.02214	1.09861	-3.2858	24.895	-0.053565	0.096181	7		32	2.9508e-05	-0.043259	0	0		3
565	2019	5.22339	1	2.76476	0.693147	-0.505185	21.4762	0.022753	0.150322	11		31	2.9508e-05	0.483326	0	1		1
565	2020	6.4176	2	2.73402	0	0.616079	21.4484	-0.047875	0.285665	8		31	2.9508e-05	-0.021947	0	1		2
565	2021	5.31761	1	2.68818	2.89037	-0.887605	21.407	0.004001	0.312469	11	28.16	31	1.8222e-05	-0.032879	0	1		1
565	2022	6.22297	2	2.73899	0	2.94472	21.4529	0.025807	0.191953	11	24.43	31	1.8222e-05	0.04701	0	1		2
565	2023	6.02183	2	2.75577	0	2.63355	21.4681	0.033743	0.162105	11	24.43	31	1.8222e-05	0.015252	0	1		2
566	2011	1.22037	1	2.75537	0	-0.409186	21.4677	0.014946	0.085773	11	15.97	31	1.8222e-05	-0.000359	0	1		1
566	2012	1.22037	1	2.87183	5.24175	-1.09834	21.5723	0.009101	0.109283	11	16.2	31	1.8222e-05	0.11007	0	1		1
566	2013	1.75513	1	3.03491	1.94591	-0.869375	21.7173	0.027812	0.195157	11	16.2	31	1.41212e-05	0.144224	0	1		1
566	2014	2.60362	1	2.87773	2.48491	-1.25892	21.5775	-0.160503	0.155391	11	16.2	31	1.41212e-05	-0.130427	0	1		1
566	2015	11.3206	1	3.04686	0	-1.68279	21.7279	0.003631	0.147466	11	16.41	31	1.10455e-05	0.132593	0	1		1
566	2016	10.2803	1	3.1214	0	-105.341	21.7936	-0.029729	0.226289	9	16.41	31	3.19968e-05	0.06792	0	1		1
566	2017	13.1955	1	3.16721	2.70805	-2.22098	21.8338	-0.102034	0.031178	11	16.85	31	0.0987882	0.041038	0	1		1
566	2018	12.4449	1	3.48465	0	-3.80682	22.1092	-0.107682	0.391602	11	16.85	31	0.335409	0.158835	0	1		1
566	2019	11.438	1	3.26563	0	-1.66035	21.9198	-0.000531	0.048092	10	16.85	31	0.335409	-0.172563	0	1		1
566	2020	12.0202	1	3.01297	2.56495	-0.1197	21.6979	0.000945	0.053033	11	17.08	31	0.335387	-0.204676	0	0		1
566	2021	11.6959	1	3.65392	0	1.44728	22.2538	0.005009	0.081693	11	17.08	31	0.335387	0.743574	0	1		1
566	2022	3.15347	1	3.99977	0	-0.478692	22.5446	0.013822	0.035861	11	17.08	31	0.335509	0.337487	0	1		1
566	2023	3.30653	1	4.17423	2.63906	-2.48002	22.689	0.019716	0.17887	11	17.08	31	0.335509	0.155357	0	1		1
570	2011	2.19603	1	4.38408	0	-0.126357	22.8608	0.011789	0.222552	11		31	0.251657	0.187413	0	1		1
570	2012	1.90904	1	4.41415	0	-0.531229	22.8852	-0.026694	0.282342	11		31	0.255059	0.024751	0	1		1
570	2013	2.28388	1	1.94588	2.56495	-10.5374	20.7542	0.038239	0.144712	11		32	0.26172	0.217416	0	1		1
570	2014	3.4777	1	2.30902	0	-0.533003	21.096	0.02812	0.27668	11	29.62	32	0.246776	0.620165	0	1		1
570	2015	3.67549	1	2.44273	2.63906	-3.34793	21.2195	0.033135	0.242873	15	29.62	32	0.245807	0.131465	0	1		1
570	2016	4.72558	1	2.65031	0	-2.3793	21.4089	0.036298	0.405714	15	29.62	32	0.243802	0.208522	0	1		1
570	2017	4.24595	1	2.87659	2.63906	-1.87565	21.6122	0.058203	0.12698	15	29.62	32	0.243806	0.225464	0	1		1
570	2018	4.57318	1	3.20504	0	-0.574698	21.9018	0.06354	0.067339	15	23.12	32	0.243793	0.335908	0	1		1
570	2019	6.14759	2	3.7983	0	-2.12921	22.4096	0.05448	0.222551	14	23.12	32	0.241921	0.661568	0	1		2
570	2020	10.7582	2	4.38826	0	-2.45691	22.8967	0.065804	0.219046	15	23.14	32	0.241848	0.611332	0	1		2
570	2021	6.9763	1	4.70146	0	5.16318	23.1487	0.036073	0.279562	11	23.14	32	0.24184	0.286564	0	1		1
570	2022	11.4353	2	4.92658	1.38629	0.788677	23.3271	0.03314	0.106029	10	23.14	32	0.241847	0.191788	0	1		2
570	2023	9.90995	1	5.34631	1.09861	0.005377	23.6542	0.054803	0.152267	11	23.14	32	0.241384	0.386935	0	1		1
571	2011	2.6979	1	5.81447	1.09861	-3.54476	24.0109	0.047284	0.144265	11	23.14	32	0.241114	0.428552	0	1		1
572	2011	1.29854	1	5.95007	0.693147	-0.416487	24.1127	0.049714	0.136008	11	23.14	32	0.182407	0.107139	0	1		1
572	2012	1.54998	1	6.18669	1.09861	-0.382019	24.2887	0.00567	0.162875	10	23.14	32	0.182443	0.192468	0	1		1
572	2013	2.24487	1	6.26193	0	-0.716654	24.3443	0.002114	0.1	11	23.14	32	0.182883	0.057127	0	1		1
572	2014	2.32564	1	6.35352	0	-0.39124	24.4116	0.001358	0.281812	11	23.14	32	0.182871	0.069692	0	1		1
572	2015	6.24093	1	6.34647	2.48491	-0.096813	24.4065	-0.035393	2.63852	11	23.14	32	0.182856	-0.005161	0	1		1
572	2016	4.33329	1	6.0753	0	0.478627	24.2061	-0.158127	1.82003	9	23.14	32	0.183006	-0.181573	0	1		1
572	2017	5.32744	1	5.48582	2.77259	-0.848505	23.7614	0.099647	1.17855	8	23.14	32	0.181184	-0.052214	0	1		1
572	2018	7.22923	1	1.80996	0	4.80793	20.5852	0.096949	1.58164	9	23.14	31	0.181018	0.627434		1		1
572	2021	6.22642	1	1.93864	1.79176	14.2035	20.7091	0.111773	2.56984	11		31	0.181018	0.152202	0	1		1
572	2022	6.21925	1	1.93479	5.68017	-53.6433	20.7054	0.088961	1.43414	11		31	0.180669	-0.003684	1	1		1
572	2023	5.54468	1	1.97358	0	-21.219	20.7425	0.096716	1.63016	11		31	0.180671	0.037805	1	1		1
576	2020	3.40682	1	2.1033	0	-1.44591	20.8658	0.116744	1.65286	11	35.53	31	0.179378	0.131217	1	1		1
576	2021	3.75807	1	2.19028	0	-0.555361	20.9478	0.091042	1.58624	13	35.53	31	0.178056	0.085433	1	1		1
576	2022	4.35704	1	2.32374	0	-0.808016	21.0725	0.11187	3.20522	13	35.53	31	0.177904	0.132855	1	0		1
576	2023	4.15559	2	2.45888	1.38629	-1.4159	21.1976	0.131043	1.57645	13	27.47	31	0.176907	0.125315	1	0		2
581	2011	10.0767	1	2.63809	1.38629	-0.212948	21.3615	0.156425	2.19312	9	27.47	31	0.177374	0.178157	1	1		1
581	2012	12.4004	4	3.1972	1.60944	-34.3646	21.86	0.130605	2.88146	9	33.912	31	0.176814	0.646293	1	0		4
581	2013	11.7624	3	3.36212	1.38629	-0.143353	22.0036	0.165138	2.39725	9	58.472	31	0.00126357	0.14757	1	0		3
581	2014	11.2864	2	3.54928	1.60944	0.090759	22.1646	0.205913	1.87923	9	49.2	31	0.00097198	0.17473	1	0		2
581	2015	15.7816	3	3.82189	2.07944	-1.03791	22.3958	0.197828	1.1399	9	49.2	31	0.000883618	0.260108	1	0		3
581	2016	19.9893	4	3.9602	0.693147	-2.98573	22.5116	0.203975	0.949069	9	49.26	31	0.000883618	0.122815	1	0		4
581	2017	28.9303	4	4.22749	2.30259	0.208353	22.7328	0.183953	0.70665	9	49.26	31	0.0014247	0.247536	0	1		4
581	2018	27.1968	4	4.40287	0	-0.248439	22.8761	0.190244	0.866163	9	46.93	31	0.000152993	0.154035	0	1		4
581	2019	24.3079	4	4.58182	2.30259	-14.5699	23.0208	0.186454	1.2084	9	42.13	31	0.000152993	0.155715	0	1		4
581	2020	29.2358	3	4.85509	2.30259	-7.89678	23.239	0.165158	1.37495	9	42.6	31	0.000131994	0.243876	0	1		3
581	2021	27.6786	2	4.99942	2.30259	0.21885	23.353	0.150441	2.12411	9	42.6	31	0.0775	0.120712	0	1		2
581	2022	27.7261	2	4.77938	2.3979	-0.38324	23.1789	-0.038218	0.077993	9	38.11	31	0.0709706	-0.15979	0	1		2
581	2023	20.4965	2	4.70129	2.30259	0.286949	23.1166	0.003741	0.262056	9	38.11	31	0.0709708	-0.064299	1	1		2
584	2011	9.63159	1	4.77661	2.19722	0.560864	23.1767	0.037746	0.17782	8	38.11	31	0.0709706	0.061918	1	1		1
584	2012	8.54542	1	2.39205	2.56495	0.055336	21.1359	0.050182	0.134471	15	38.11	31	0.0709706	-0.012572	1	1		1
584	2013	8.45165	1	2.78452	2.83321	-0.189719	21.4939	0.040541	0.090252	15		31	0.0746039	0.4399	1	1		1
584	2014	9.22971	1	2.98638	0	-4.30792	21.6743	0.0418	0.072425	14		31	0.0746039	0.20013	1	1		1
584	2015	8.22863	1	3.22955	1.94591	0.356465	21.8883	0.037299	0.149441	9		31	0.0709706	0.238653	1	1		1
584	2016	12.2104	1	3.31894	0	-0.234094	21.9661	0.018841	0.227643	9	31.4	31	0.0709706	0.08092	1	1		1
584	2017	15.2395	1	3.21442	0	-0.480086	21.8751	-0.040534	0.198169	9	31.4	31	0.0709755	-0.079572	1	1		1
584	2018	18.4016	1	3.25153	0	-1.66154	21.9075	0.003162	0.476252	9	31.24	31	0.0709755	0.032921	1	1		1
584	2019	18.886	1	3.16244	0	0.047916	21.8296	0.008139	0.724553	9	24.06	31	0.0709755	-0.09694	1	1		1
584	2020	18.1645	1	3.37506	0	-0.336492	22.0148	0.027994	0.512662	9	19.26	31	0.0568661	0.203416	1	1		1
584	2021	17.5446	1	5.1054	0	-0.348078	23.4361	0.113605	0.330341	8	18.89	31	0.0521131	0.293772	0	1		1
584	2022	13.8813	1	5.75281	0	0.054162	23.9342	0.117672	0.337169	9	18.91	31	0.0521131	0.645489	1	1		1
586	2012	2.12406	1	6.20196	3.09104	0.170343	24.2704	0.097328	0.240625	9	18.91	31	0.0288805	0.369554	1	1		1
586	2013	1.28282	1	6.5662	0	-363.242	24.5379	0.054361	0.245753	9	18.89	31	0.0279073	0.306665	1	1		1
586	2014	2.49542	1	6.67521	2.19722	0.054593	24.6171	0.03153	0.252774	9	18.9	31	0.0279073	0.077822	1	1		1
586	2015	3.8643	1	6.66827	0	0.216716	24.612	0.00833	0.284302	9	19.73	31	0.0279073	-0.0506	1	1		1
586	2016	10.9124	1	6.48365	2.70805	-0.84004	24.4777	-0.001468	0.366998	9	18.11	31	0.0292697	-0.126303	1	1		1
586	2017	10.7468	1	6.52375	0	-0.375791	24.5069	0.004925	0.349957	8	15.13	31	6.39477e-06	0.028453	1	1		1
586	2018	12.3719	1	6.69401	3.17805	-0.141087	24.6307	0.02067	0.296367	8	15.13	31	6.67326e-06	0.131727	0	1		1
586	2019	13.2589	1	6.98254	0	2.54204	24.8382	0.033562	0.26146	8	15.13	31	0.00702112	0.230658	0	1		1
586	2020	12.4013	1	7.31033	0	-0.882812	25.0709	0.047164	0.248361	9	15.29	31	0.0063241	0.261907	0	1		1
586	2021	11.6601	2	7.55568	0	-0.188389	25.2428	0.040804	0.284107	9	15.33	31	0.00474472	0.187673	0	1		2
586	2022	12.6727	2	7.81686	1.38629	0.217613	25.424	0.051325	0.128506	9	15.32	31	0.00499962	0.198611	0	1		2
586	2023	5.57564	2	3.83491	2.30259	0.701464	22.4067	0.062288	0.133667	8	15.32	31	0.00500005	0.623338	0	1		2
590	2011	10.4684	1	4.21637	0	0.653176	22.7237	0.024516	0.083316	11		31	0.00335746	0.372915	0	1		1
590	2012	10.0719	1	4.41438	0	-0.193984	22.8854	0.054783	0.327945	13		31	0.00234562	0.175563	0	1		1
590	2013	9.46863	1	4.61651	0	0.509321	23.0487	0.069116	0.335088	15		31	0.00450662	0.177325	0	0		1
590	2014	9.54541	1	5.16986	2.63906	0.185887	23.4865	0.040443	0.146519	15	26.08	31	0.00292973	0.549263	0	1		1
590	2016	11.7588	1	5.33152	1.38629	-0.343068	23.6119	0.036832	0.116324	15	26.08	31	0.00450662	0.133696	0	1		1
590	2017	10.5654	1	5.50575	0	0.00947	23.746	0.036378	0.117243	15	26.36	31	0.00444092	0.143498	0	1		1
590	2018	11.128	1	5.59573	1.60944	-0.335328	23.8148	0.05536	0.037617	15	26.36	31	0.00533473	0.070654	1	1		1
590	2019	11.229	1	5.83047	0	-0.14133	23.9928	0.047892	0.034742	15	42.06	31	0.0060048	0.194828	1	1		1
590	2020	4.31092	1	5.92384	0.693147	-0.547959	24.0631	0.033811	0.038823	15	42.06	31	0.0060048	0.072761	1	1		1
590	2021	5.08233	1	6.21603	0.693147	-0.786287	24.2808	0.037108	0.042387	15	42.06	31	0.00332452	0.243293	0	1		1
590	2022	4.29619	1	6.57441	1.09861	-1.70718	24.5438	0.012902	0.048986	15	39.68	31	0.00300525	0.300871	0	1		1
590	2023	3.85783	1	6.63615	1.38629	-1.46993	24.5887	0.000978	0.038778	15	39.68	31	0.00332452	0.045903	0	1		1
595	2013	4.04799	1	6.63026	0.693147	-2.11917	24.5845	0.014527	0.054846	12		31	0.00286992	-0.004265	0	1		1
595	2014	5.5165	2	6.8778	0.693147	-0.440304	24.7632	0.007978	0.085984	12		31	0.00220669	0.195702	0	1		2
595	2015	13.5784	2	7.32258	0.693147	-0.16744	25.0795	0.012544	0.062707	12		31	0.0021969	0.372033	0	1		2
595	2016	12.7104	1	7.39934	0.693147	-0.540816	25.1335	0.02458	0.197497	10	14.64	31	3.67304e-05	0.055459	0	1		1
595	2018	10.8484	1	7.75772	0.693147	-0.222025	25.3832	0.035588	0.099638	10	14.64	31	3.67304e-05	0.283644	0	1		1
595	2019	3.34701	1	7.75352	1.79176	1.25956	25.3803	0.024352	0.060859	11	14.64	31	2.15561e-05	-0.0029	0	1		1
595	2021	3.83333	1	7.64902	1.79176	0.452463	25.3078	0.017898	0.181268	8	9.45	31	2.15558e-05	-0.069881	0	1		1
595	2022	3.40804	1	7.55221	0	1.18325	25.2404	0.020816	0.0533	9	9.45	31	2.15558e-05	-0.065165	0	1		1
595	2023	3.94332	1	7.40894	0	-0.193321	25.1402	0.025225	0.060667	9	9.45	31	2.15558e-05	-0.095375	0	1		1
597	2011	5.79375	3	1.52751	6.12249	0.347371	20.5051	0.07811	0.132181	9	5.14	36	2.15558e-05	-0.10626	0	1		3
597	2012	3.53304	2	1.40998	4.94164	-0.511606	20.3901	-0.061369	0.305626	9	5.14	36	3.02988e-05	-0.073078	0	1		2
597	2013	12.2131	2	1.33245	6.23245	0.502872	20.3135	-0.211566	0.453607	7	5.14	36	3.32137e-05	-0.072044	0	1		2
597	2014	15.8008	3	1.68803	5.99645	-3.46309	20.6605	-0.03233	0.263063	9	5.14	36	2.15558e-05	0.267585	0	1		3
597	2015	15.2633	2	1.72716	7.11151	-19.5537	20.6981	-0.081812	0.136106	9	5.14	36	2.34553e-05	0.038285	0	1		2
597	2016	15.2672	2	2.28464	5.99894	1.76213	21.2213	-0.109853	0.199141	9	4.16	36	2.40907e-05	0.329416	0	1		2
597	2017	14.9999	1	2.32942	7.25559	4.12434	21.2624	-0.074147	0.340042	9	10	36	2.15574e-05	0.041939	0	1		1
597	2018	8.80566	2	3.78062	5.99396	0.324999	22.5287	0.034312	0.3108	7	13.05	36	2.87427e-05	0.214693	0	1		2
597	2019	8.84462	1	3.52727	7.29641	3.0809	22.316	0.042937	0.369413	9	13.05	36	2.15574e-05	-0.191575	0	1		1
597	2020	8.40108	1	3.60064	7.39879	-0.24958	22.3779	0.034148	0.397517	9	13.05	36	0.0740826	0.063882	0	1		1
597	2021	6.79378	1	3.70191	7.67276	2.39141	22.4629	0.038491	0.414741	9	10.05	36	0.0567977	0.088743	0	1		1
597	2022	7.41789	1	3.77354	7.90286	-1.31638	22.5228	0.039565	0.264601	9		36	0.0740832	0.061644	0	0		1
597	2023	6.17868	1	1.79498	3.04452	-0.223009	20.7247	0.081957	0.371748	11		35	0.0740832	0.068354	0	1		1
605	2013	2.52583	1	2.37756	0	0.953557	21.2698	0.054584	0.161919	11		35	0.0740832	0.810151	0	1		1
607	2012	4.92804	1	2.72428	0	-2.42452	21.5834	0.04385	0.081034	9		35	0.0740214	0.368314	0	1		1
607	2013	4.62096	1	2.90367	0	-1.31227	21.7427	0.040032	0.20932	9	12.72	35	0.0740214	0.172706	0	1		1
607	2014	6.0099	1	3.0281	2.94444	0.015528	21.8521	0.043051	0.536598	9	12.72	35	0.0740826	0.11559	0	1		1
615	2011	12.233	3	3.0728	0	3.23254	21.8912	0.026327	0.276419	9	12.72	35	0.0708648	0.039849	0	1		3
615	2012	13.1443	3	2.88481	0	7.6465	21.726	0.025717	0.343401	8	20.71	35	0.0708648	-0.152204	0	1		3
615	2013	13.7875	3	2.89278	0	-1.2111	21.7331	0.029485	0.106884	8	25.33	35	0.0708648	0.006858	0	1		3
615	2014	18.6631	3	2.86181	3.71357	-1.33005	21.7057	-0.024409	0.16086	9	25.33	35	0.0708648	-0.027016	0	1		3
615	2015	14.6009	3	2.91805	0	69.3872	21.7554	0.00266	0.103492	9	26.21	35	0.0523442	0.050952	0	1		3
617	2011	3.88622	3	2.75045	1.09861	-1.24922	21.6068	0.034368	0.218131	9	26.21	35	0.0708648	-0.138119	0	1		3
617	2012	4.67953	3	2.71983	0	-0.163167	21.5794	-0.049223	0.105935	9	26.21	35	0.0708648	-0.026971	0	1		3
617	2014	4.7685	4	2.69447	0	-0.678498	21.5567	0.001878	0.174599	9	26.21	35	0.0740826	-0.022432	0	1		4
617	2015	3.75093	3	2.44806	0	-70.5521	21.3342	-0.103768	0.224324	9	26.21	35	0.0740826	-0.19951	0	1		3
622	2013	8.38471	1	2.42497	0	0.370046	21.3131	-0.081085	0.613353	8	37.87	35	0.0459747	-0.02083	0	1		1
622	2014	8.6714	1	2.08834	3.55535	0.563069	21.0022	0.041099	0.20731	9	36.68	35	0.0459747	-0.143156	0	1		1
622	2015	9.3575	1	2.22488	3.43399	-0.946043	21.1292	0.028177	0.364426	9	34.2	35	0.0459751	0.135483		1		1
622	2017	8.08518	1	2.21309	0	-0.214892	21.1183	0.069295	0.473087	9	34.2	35	0.0459751	-0.010863	0	1		1
622	2018	8.74043	1	2.30131	0	-0.055463	21.1998	0.040193	0.329973	8	34.21	35	0.0450078	0.084898	0	1		1
622	2019	8.19669	1	2.43263	0	1.04203	21.3201	0.041525	0.142628	8	34.2	35	0.0333372	0.127858	0	1		1
622	2020	8.8559	1	2.63228	0	0.821376	21.5009	0.139461	0.29971	9	33.84	35	0.0333372	0.19817	0	1		1
622	2021	9.11104	1	2.40624	0	-0.07906	21.1859	0.01631	0.336212	7	33.37	32	0.00136173	0.019542	0	1		1
622	2022	10.037	1	2.46481	3.58352	-0.366505	21.2398	0.044573	0.558402	7		32	0.00067868	0.082613	0	1		1
622	2023	3.59847	1	2.57655	0	-0.071111	21.3419	0.046496	0.718293	10		32	0.00054947	0.110371	0	1		1
623	2011	3.65875	2	2.72796	3.13549	-0.118767	21.479	0.057047	0.912742	15	14.96	32	0.000309685	0.146464	0	1		2
623	2012	4.224	2	2.76525	0.693147	-0.085052	21.5126	0.061195	0.941573	15	14.96	32	0.000309685	0.034115	0	1		2
623	2013	5.16046	3	2.74575	3.8712	0.268937	21.4951	0.053739	0.49602	9	14.96	32	0.000309685	-0.017375	0	0		3
623	2014	2.97764	2	2.88843	5.68358	0.262255	21.6228	0.060741	0.322331	8	12.46	32	0.000232263	0.136236	0	0		2
623	2015	3.50748	2	3.09284	5.70378	0.218511	21.8036	0.177675	0.265668	9	12.46	32	0.000232263	0.171193	0	0		2
623	2016	3.22296	2	3.08435	0	0.245621	21.7962	0.024936	0.24314	9	12.46	32	0.000232263	-0.007438	0	0		2
623	2017	4.14121	2	3.16	0	0.195993	21.8625	0.164447	0.622817	9	5.83	32	0.000232939	0.068597	0	0		2
623	2018	5.66002	2	3.34259	0	0.12112	22.0213	0.123564	1.67783	9	3.89	32	0.000232939	0.172071	0	0		2
623	2019	4.78812	2	3.60938	1.09861	-0.31243	22.25	0.084251	1.59486	9	3.89	32	0.000140034	0.256941	0	0		2
623	2020	5.21199	2	3.8489	1.09861	-0.356482	22.452	0.084353	1.6726	9	3.89	32	0.000140034	0.223955	0	0		2
623	2021	3.43344	1	4.03272	0.693147	-0.294664	22.6052	0.079803	1.63607	11	3.89	32	0.000139358	0.165476	0	0		1
623	2022	2.57465	1	4.16155	0	-0.446529	22.7115	0.075812	1.31772	11	6.25	32	0.000263232	0.112184	0	0		1
623	2023	4.45015	1	4.28464	1.79176	-0.487751	22.8124	0.081654	3.01897	11	8.6	32	0.00016739	0.106117	0	0		1
625	2011	21.9207	1	4.61234	2.07944	-0.467697	23.0774	0.07882	4.28558	11	14	32	0.000166887	0.303524	0	0		1
625	2012	24.1086	3	5.1337	2.07944	-0.494064	23.4894	0.282286	2.94094	10	14	32	0.000237042	0.509862	0	0		3
625	2013	21.9191	3	5.25267	1.60944	-0.095542	23.5819	0.067769	1.37279	10	14	32	0.000235767	0.096845	1	0		3
625	2014	15.6692	2	5.29202	2.30259	-0.349117	23.6123	0.081305	0.705525	10	14	32	0.000235365	0.030917	1	0		2
625	2015	23.1151	3	5.46847	2.77259	0.467765	23.7481	0.103509	0.755014	11		32	0.000290826	0.145432	1	0		3
625	2016	15.1371	1	5.57706	2.83321	-0.134943	23.8311	0.087257	1.56845	11		32	0.000297824	0.0865	0	0		1
625	2017	27.0749	2	1.99605	0	-0.023832	20.802	0.071551	0.802614	7		32	0.000297823	2.93903	1	0		2
625	2018	26.0816	1	2.05577	2.89037	-0.184794	20.8587	0.07533	1.65091	9		32	0.000297808	0.058277	1	0		1
625	2019	26.3066	1	2.13188	8.85993	0.547402	20.9305	0.056073	3.84526	10	27.35	32	0.000234852	0.074442	1	0		1
625	2020	28.6595	2	2.26174	6.84375	-0.567319	21.052	0.008012	2.4723	10	27.35	32	0.00023485	0.129267	1	0		2
625	2021	27.5344	2	2.18692	0	-0.375444	20.9821	-0.080221	1.63767	6	27.35	32	0.000234798	-0.067514	1	0		2
625	2022	31.4645	2	2.13041	6.81564	0.392521	20.9291	0.005395	0.303704	6	20.23	32	0.00023479	-0.051668	1	1		2
625	2023	27.6287	3	1.78438	8.20604	-0.077483	20.5991	-0.201778	0.094879	5	20.6	32	0.000244275	-0.281519	1	1		3
627	2011	6.70963	4	1.65125	8.33878	-0.229995	20.4697	-0.181561	0.160263	6	20.6	32	0.000244256	-0.121362	1	1		4
627	2012	4.59464	3	1.87308	7.14992	1.24846	20.6846	0.009664	0.160426	6	20.6	32	0.00024419	0.278132	1	1		3
627	2013	5.41639	3	1.8816	10.0308	-0.948081	20.6927	0.002528	0.139478	6	21.58	32	0.000244141	0.008206	0	1		3
627	2014	5.23089	3	1.81852	8.91771	-0.224334	20.6321	0.015863	0.209165	5	21.58	32	0.000167631	-0.058852	0	1		3
627	2015	11.7408	3	1.71097	7.5148	-1.34002	20.528	-0.120917	0.396569	6	21.58	32	0.00016754	-0.098887	0	1		3
633	2013	9.16098	1	1.70533	10.3578	8.85537	20.5225	-0.011229	0.313091	5	36.04	32	0.00016753	-0.005472		1		1
633	2014	11.6637	1	1.72581	9.08941	-0.843012	20.5424	-0.13529	0.285562	6	36.04	32	0.000167529	0.020102	1	1		1
633	2015	12.0275	1	1.93146	7.46164	-0.426043	20.7405	0.005513	0.782134	5	36.04	32	0.000167524	0.219082	1	1		1
633	2017	5.37529	1	1.83966	10.6015	0.069535	20.6524	0.011432	0.49294	6	33.68	32	0.000294988	-0.084267	1	1		1
633	2018	2.6518	1	1.83322	9.08182	-0.062048	20.6463	-0.032096	0.297543	6	23.3	32	0.000294988	-0.006175	0	0		1
633	2019	2.5992	1	1.82189	7.91717	-0.403366	20.6353	0.019104	0.094198	6	23.3	32	0.000294987	-0.010855	0	1		1
635	2011	8.12923	4	1.71238	10.8103	2.82992	20.5293	0.033576	0.480061	6	22.97	32	0.000255454	-0.100585	0	1		4
635	2012	7.22243	4	1.68149	9.51104	5.94799	20.4993	-0.047881	0.528524	6	18.97	32	0.000255453	-0.029617	0	1		4
635	2013	7.22741	3	0.825813	9.01372	-3.68164	19.8007	0.071372	0.69919	9	15.97	36	0.000255447	0.0839	0	0		3
635	2014	8.59905	4	0.997928	8.00936	-11996.6	19.9775	0.035825	0.246231	7		36	0.000255443	0.257598	0	0		4
635	2015	4.23437	2	0.962898	4.79579	-0.138332	19.9418	0.016702	0.215893	9		36	0.000255415	-0.03513	0	0		2
635	2016	7.44637	4	1.08698	8.92386	-0.615903	20.0679	0.014475	0.128862	8		36	0.000255415	0.134481	0	0		4
635	2017	8.71407	4	1.00982	8.09285	0.056622	19.9896	-0.033348	0.107316	9	29.83	36	0.000255401	-0.083331	0	0		4
635	2018	7.88068	4	1.15653	11.0694	6.88426	20.1381	0.037845	0.154641	9	20.03	36	0.000255371	0.159996	0	0		4
635	2019	9.53783	5	1.06796	9.92412	0.108076	20.0487	0.060848	1.14843	7	20.03	36	0.000255343	-0.085494	0	1		5
635	2020	7.55053	4	1.07913	0	-0.571015	20.06	0.020286	0.636222	7	29.83	36	0.000237197	-0.003562	0	1		4
635	2021	18.2568	2	0.980603	0	-2.35316	19.9599	-0.058988	0.392679	7	9.22	36	0.000237098	-0.095295	0	1		2
635	2022	6.90853	2	1.07694	4.41884	-1.79958	20.0578	0.005781	0.990533	7	10.25	36	0.000237094	0.102878	0	1		2
635	2023	7.02757	2	1.01031	3.13549	-0.408696	19.9901	0.023633	1.1575	7	18.01	36	0.000237093	-0.065396	0	1		2
636	2011	8.99953	1	0.993148	5.48894	26.1929	19.9727	-0.023897	1.48061	7	21.38	36	0.000237048	-0.017339	0	1		1
636	2012	10.0051	1	0.99756	0	1.61065	19.9771	0.007373	1.56488	7	21.38	36	0.000236503	0.004508	0	1		1
636	2013	12.2084	1	3.52762	3.91202	1.724	22.3163	0.077167	1.60747	9	21.58	36	0.000236503	0.528877	0	1		1
636	2014	14.8977	1	3.52514	0	0.176963	22.3142	0.080628	1.38828	9	21.58	36	0.000236503	-0.002096	0	1		1
636	2015	13.7376	1	3.58337	0	-0.19265	22.3634	0.043789	0.149596	9	21.58	36	0.000236503	0.050407	0	1		1
636	2016	8.77375	1	4.42013	3.95124	0.154141	23.0516	0.015138	0.104519	9	21.58	36	0.000236503	0.289643	0	1		1
636	2017	11.5214	1	4.35394	4.21951	0.441151	22.9983	0.012361	0.160355	8	22.47	36	0.00306217	-0.051856	1	1		1
636	2018	8.85958	1	4.43963	4.30407	0.553657	23.0672	0.033357	0.195487	9	22.47	36	0.00161167	0.071325	1	1		1
636	2019	9.11563	1	4.50827	4.26268	7.04286	23.1222	0.023178	0.219901	9	23.58	36	0.00269064	0.056484	1	1		1
636	2020	11.6746	1	4.63358	6.04737	-0.206365	23.222	0.022567	0.20071	8	23.79	36	0.00269062	0.104933	0	1		1
636	2021	14.9771	1	4.81408	0	3.41104	23.3645	0.034591	0.202253	9	23.79	36	0.0020425	0.153212	0	1		1
636	2022	19.5068	2	2.91921	4.49981	0.838609	21.6502	0.002187	0.19822	7	23.79	32	0.0020425	0.000523	0	1		2
636	2023	14.1301	4	2.79303	3.3322	0.75027	21.5375	-0.15484	0.148967	7		32	0.000841721	-0.106542	0	1		4
650	2011	3.12573	1	2.81387	6.10925	2.18751	21.5562	0.003525	0.230041	7		32	0.000631287	0.018849	0	1		1
650	2012	2.41845	1	2.78694	0	4.35829	21.5321	-0.088115	0.485457	9		32	0.0005921	-0.023845	0	1		1
650	2013	2.2674	1	2.84141	3.46574	3.2957	21.5808	0.00728	0.322661	9	58.93	32	0.0005921	0.049982		1		1
650	2014	3.54946	1	2.87997	3.21888	0.187828	21.6152	0.00291	0.397856	5	58.93	32	0.0005921	0.035008	0	1		1
650	2015	5.91454	1	2.84856	6.14204	-0.112102	21.5872	0.005289	0.466612	7	45.43	32	0.000394662	-0.027637	0	1		1
650	2016	5.21784	1	3.09078	0	-0.386841	21.8018	0.006024	0.525783	7	45.43	32	0.000431962	0.208902	0	1		1
650	2017	5.59776	1	3.25367	4.26268	0.121594	21.9442	0.007562	0.419541	9	45.425	32	0.000282766	0.028581	0	1		1
650	2018	3.85867	1	3.65557	3.82864	-0.516641	22.2892	0.062916	0.586607	9	45.425	32	0.000282766	0.228514		1		1
650	2019	3.33653	1	4.13012	6.286	-0.393342	22.6856	0.045881	0.504014	9	45.425	32	0.000282762	0.486581	0	1		1
650	2020	3.59163	1	4.21057	0	-0.563093	22.7518	0.011711	0.450092	9	45.425	32	0.000299205	0.068351	0	1		1
650	2021	6.82717	1	4.2553	4.5326	0.182931	22.7884	0.020438	0.647343	9	35.22	32	0.00941104	0.0373	0	1		1
650	2022	6.40932	1	4.3504	3.91202	-0.2637	22.8659	0.032402	0.601056	9	35.22	32	0.00690875	0.080652	0	1		1
650	2023	6.30336	1	4.41884	6.34914	-0.369327	22.9215	0.031125	0.596755	9	35.22	32	0.00681224	0.057127	1	1		1
651	2011	25.8969	4	4.42665	0	-0.427521	22.9278	0.002341	1.03632	9	35.22	32	0.00681469	0.00635	1	1		4
651	2012	27.5551	3	4.82843	4.60517	-0.310378	23.2496	0.017603	0.932264	9	35.23	32	0.00681469	0.35403	1	1		3
651	2013	29.9887	3	5.13884	4.20469	-0.340005	23.4934	0.002261	0.752248	9	30.04	32	0.00681469	0.276148	1	1		3
651	2014	29.0535	3	5.10632	6.42811	-0.11146	23.4681	0.002241	0.537528	9	30.04	32	0.00514077	-0.025042	0	1		3
651	2015	28.5672	4	4.98954	0	-0.244548	23.3767	0.003064	0.595913	9	30.04	32	0.0052373	-0.087366	0	1		4
651	2016	30.346	4	5.1502	0	-1.00397	23.5023	-0.004913	0.689304	9	31.04	32	0.00385158	0.133861	0	1		4
651	2017	31.4457	5	5.0754	2.99573	-10.6248	23.4439	0.005733	0.322221	9	31.04	32	0.00418046	-0.056689	0	1		5
651	2018	35.6953	6	0.910087	2.77259	-1.62311	20.2914	0.003746	0.426785	7		46	0.00418046	-0.07528	1	1		6
651	2019	36.9914	7	1.05336	4.11087	0.097635	20.4327	0.006071	0.40694	9		46	0.0039539	0.167043	1	1		7
651	2020	36.9914	6	0.746382	1.38629	-0.495904	20.1279	-0.210037	0.341713	7		46	0.00403287	-0.262742	0	1		6
651	2021	33.9764	2	0.772854	1.94591	-2.16715	20.1545	0.003916	0.915661	7	45.9	46	0.00374475	0.026957	0	1		2
651	2022	36.9914	2	0.7728	3.04452	5.44614	20.1544	0.005388	0.309781	7	45.9	46	0.00322364	-5.4e-05	0	1		2
651	2023	32.081	3	0.86429	3.17805	-2.19541	20.2459	0.021203	0.137908	7	45.9	46	0.00129563	0.095785	0	1		3
661	2011	1.22037	1	0.902337	3.29584	0.835534	20.2837	0.016875	0.046775	7	30.2	46	0.00126613	0.038553	0	1		1
661	2012	2.69936	1	0.991797	0	-0.117148	20.3722	0.015614	0.036519	7	28.51	46	0.00130776	0.07234	0	1		1
661	2013	2.17582	1	0.944042	0	-0.055351	20.325	0.008935	0.073223	7	28.51	46	0.00293407	-0.04605	0	1		1
661	2014	1.99604	1	1.06784	0	-0.117914	20.4468	0.012056	0.097356	7	28.51	46	0.00193407	0.129553	0	1		1
661	2015	10.8253	1	1.28018	0	0.283155	20.6529	0.015399	0.100769	7	28.51	46	0.00193407	0.227482	0	1		1
661	2016	10.4381	1	1.79726	0	1.1257	21.1407	0.01203	0.139779	7	44.75	46	0.00193407	0.628658	0	1		1
661	2017	9.78501	1	2.00711	0	1.06707	21.3333	0.010987	0.11431	7	44.75	46	0.00229908	0.212438	0	1		1
661	2018	2.58186	1	2.34541	0	-0.55149	21.6379	0.013143	1.56321	7	44.75	46	0.00134448	0.356039	0	1		1
661	2019	9.76523	1	2.55797	2.19722	-1.27456	21.8257	0.013271	1.03639	7	44.75	46	0.000153597	0.206566	0	1		1
661	2020	10.2521	1	2.74016	1.79176	-27.3485	21.9845	0.008405	0.376402	7	44.75	46	0.000199676	0.173196	0	1		1
661	2021	11.6365	2	2.93367	2.07944	-1.07278	22.1512	0.00935	0.518084	7	51.75	46	0.000199676	0.181398	0	1		2
661	2022	13.1163	3	3.10189	2.07944	-1.23294	22.2945	0.007023	0.389729	7	51.75	46	0.000146958	0.154035	0	1		3
661	2023	8.69281	4	3.40589	2.77259	-2.85487	22.5497	-0.029572	0.371055	7	51.75	46	0.000104825	0.290695	0	1		4
663	2016	12.3569	3	3.58544	2.63906	7.35186	22.6982	-0.01529	0.236202	7	45.84	46	9.20968e-05	0.04969	0	1		3
663	2017	15.7872	3	2.69675	4.11087	0.82067	21.9469	-1.39516	0.295011	7	45.1	46	9.20968e-05	-0.528284	0	1		3
663	2018	16.1403	5	1.40669	0.693147	0.037289	20.2682	0.062571	0.183969	7		33	9.20968e-05	0.954829	0	1		5
663	2019	14.5838	3	1.69864	0	-0.002245	20.5548	0.078552	0.24252	7		33	9.20968e-05	0.332281	0	0		3
663	2021	12.9347	3	1.68773	0.693147	-0.051	20.5442	0.053517	0.192877	7		33	9.20968e-05	-0.010536	0	1		3
663	2022	11.8217	3	1.76221	0	0.548175	20.6164	0.052099	0.174518	9	63.47	33	0.000122796	0.074769	0	1		3
663	2023	5.49346	3	2.10053	0	0.302879	20.9386	0.044611	0.148167	9	57.21	33	0.000122796	0.380229	0	1		3
669	2011	1.22037	1	2.62887	0.693147	-0.646199	21.4257	0.024519	0.11493	9	57.21	33	0.000122796	0.627592	0	1		1
670	2014	12.2366	1	2.78972	1.94591	0.165747	21.5704	0.01811	0.094355	9	44.37	33	1.07952e-05	0.15566	0	0		1
670	2015	16.762	1	2.98692	0	0.028124	21.7456	0.014104	0.090455	9	44.37	33	1.07952e-05	0.18678	0	0		1
670	2017	15.5763	1	3.127	1.38629	-0.25583	21.8686	0.012103	0.094055	9	44.37	33	1.43936e-05	0.130941		0		1
670	2018	15.3449	1	3.32631	2.63906	0.882838	22.0418	0.000728	0.184592	9	38.69	33	0.000271005	0.189039	0	1		1
670	2022	12.1486	2	3.31295	0	1.42504	22.0302	-0.002586	0.033102	9	38.69	33	0.000231273	-0.011474	0	1		2
670	2023	1.8949	2	4.17871	0	-0.03208	22.7584	0.009597	0.007261	9	34.98	33	0.000212531	1.07135	0	1		2
676	2014	25.8072	1	4.39336	0	0.781119	22.9333	0.032739	0.006894	9	34.98	33	0.000251889	0.191046	0	1		1
676	2015	13.6686	1	4.54719	0	0.549093	23.0573	0.036025	0.187511	9	34.98	33	0.000158439	0.01578	0	0		1
676	2016	16.8921	1	4.59696	0	0.545254	23.0971	0.037753	0.197913	9	34.98	33	0.00179321	0.040698	0	0		1
677	2013	12.4424	1	4.27368	0	0.175351	22.836	0.015974	0.182874	9	34.98	33	0.0016302	-0.229801	0	0		1
677	2014	17.8622	1	4.57533	0	0.30287	23.0798	0.012032	0.154637	9	34.98	33	0.0016302	0.276063	0	0		1
677	2016	3.01918	1	4.76189	3.17805	0.53853	23.2286	0.057679	0.556041	9	34.98	33	0.000579821	0.160371	1	0		1
677	2017	3.79809	1	4.87701	0	-0.041306	23.3196	0.047501	0.398662	9	34.98	33	0.000194138	0.079221	1	1		1
677	2018	5.1886	2	4.90955	0	1.84328	23.3452	-0.024475	0.35215	9	34.67	33	0.000194138	0.025967	0	1		2
677	2019	3.88655	1	4.68736	2.56495	2.04789	23.1693	-0.012916	0.202594	9	34.67	33	0.000194134	-0.163665	0	1		1
677	2020	4.61709	2	2.14989	0	-0.060297	20.9098	0.000912	0.297409	8	34.68	31	0.000500261	0.052125	0	1		2
677	2021	3.46354	2	2.19669	0	51.4096	20.9538	0.017472	0.381571	8		31	0.000364392	0.046405	0	0		2
677	2022	3.2569	2	2.37559	0	-0.538469	21.1206	0.083989	0.528305	9		31	0.000222981	0.181683	0	0		2
677	2023	3.91028	2	2.57706	3.3322	-1.38843	21.3059	0.124334	0.334382	7		31	0.000222981	0.203557	0	0		2
678	2011	11.392	1	2.92345	0	17.018	21.6183	0.097071	0.427511	9	49.4	31	0.000148144	0.366729	0	1		1
678	2012	11.2079	1	3.01209	0	-0.844638	21.6971	0.079053	0.600206	9	50.18	31	0.000148144	0.081937		1		1
678	2013	14.0014	2	3.2035	2.99573	-0.954916	21.8656	0.114197	0.540269	9	50.18	31	0.000151622	0.183483	0	1		2
678	2014	12.9697	2	3.56443	0	-1.61666	22.1776	0.132476	0.570937	9	51.19	31	0.000137704	0.35223	0	1		2
678	2015	4.69519	1	4.0176	0	-2.64608	22.5594	0.054528	0.514263	9	51.26	31	0.000137704	0.385123	0	1		1
678	2016	4.70023	1	4.53292	2.70805	-1.56107	22.9814	0.090688	0.34862	9	51.26	31	0.000137704	0.524942	1	1		1
678	2017	6.06587	1	5.37583	0.693147	-159.206	23.6462	0.083293	0.310312	9	51.26	31	0.000142146	0.944033	1	0		1
678	2018	5.87547	1	5.63914	3.61092	-0.554214	23.8479	0.058284	0.36129	9	51.5	31	0.00158428	0.223524	1	0		1
678	2019	6.97813	2	5.62944	0	-0.731626	23.8405	0.012345	0.302252	9	51.5	31	0.00159455	-0.007358	1	0		2
678	2020	8.19422	2	5.60575	3.58352	-2.64989	23.8225	0.014959	0.308154	9	51.5	31	0.00158428	-0.01789	1	0		2
678	2021	7.89074	2	5.52179	2.48491	6.99894	23.7583	0.009286	0.136558	9	51.5	31	0.00101072	-0.078291	1	0		2
678	2022	6.99817	2	5.49532	3.4012	-1.33116	23.738	0.001019	0.111877	11	51.5	31	0.00102103	-0.02007	1	0		2
678	2023	7.56112	2	5.50805	2.89037	-1.32553	23.7478	0.002311	0.088704	11		31	0.00101853	0.009796	1	0		2
680	2011	11.1127	4	5.57454	1.38629	-0.961162	23.7986	0.014879	0.980193	11		31	0.00101072	0.052174	1	1		4
680	2012	11.6683	4	5.82605	1.09861	-0.75728	23.9895	0.032083	1.51092	11		31	0.000585646	0.144661	1	1		4
680	2013	16.2227	3	5.99963	1.09861	-1.13531	24.1198	0.03596	1.54681	11		31	0.000152609	0.139226	1	1		3
680	2014	17.618	1	6.17435	2.56495	-0.875295	24.2499	0.039561	1.22381	11	29.83	31	0.000152609	0.138947	0	1		1
680	2015	13.359	2	6.4089	2.56495	-0.020355	24.4229	0.025171	1.11925	11	30.39	31	0.000142146	-0.014065	0	1		2
680	2016	8.65487	2	3.01317	2.56495	-6.93422	21.7334	0.002558	1.94677	9	30.39	32	0.000143627	-0.003372	0	1		2
680	2017	17.8767	2	2.83129	2.3979	-1.07223	21.5718	-0.137335	2.28176	9	21.96	32	0.00235507	-0.130942	0	1		2
680	2018	19.9801	3	2.35527	2.30259	-2.0099	21.1389	-0.559773	1.29221	9	21.96	32	0.00181159	-0.351384	0	1		3
680	2019	21.5456	2	1.83933	3.8712	-0.682261	20.6521	0.063146	1.91293	9	21.96	32	0.00181166	-0.083686	0	1		2
680	2020	18.3404	2	1.90613	0	-2.11388	20.7162	0.060771	2.15389	8	21.96	32	2.87894e-05	0.066219	0	1		2
680	2021	21.8695	1	2.02042	0	-1.79991	20.8252	0.06332	2.49722	9	21.96	32	2.15908e-05	0.115074	0	1		1
680	2022	24.4939	2	2.1103	1.79176	-0.66174	20.9102	0.051198	1.83906	9	21.96	32	0.00329909	0.0887	0	1		2
680	2023	15.6413	2	2.19437	0	-0.982298	20.9891	0.061533	1.63234	9	21.96	32	0.0170361	0.082165	0	1		2
682	2012	17.5601	3	2.32468	2.3979	-1.29641	21.1105	0.104208	0.533863	8	21.96	32	0.0137611	0.129093	0	1		3
682	2013	28.033	3	2.30853	0	-1.224	21.0955	0.051272	0.679655	9	21.96	32	0.0137585	-0.014874		1		3
682	2014	29.4861	3	2.40607	2.48491	-2.22983	21.1858	0.067765	0.737742	9	21.34	32	0.0137585	0.085097	0	1		3
682	2015	29.2202	3	2.68215	0	-2.19808	21.4377	0.076302	0.707758	8	19.96	32	0.0182925	0.286526	0	1		3
682	2016	35.2724	2	2.71703	4.14313	-5.63299	21.4692	0.090766	0.583273	8	19.96	32	0.000156673	0.031981	0	1		2
682	2017	19.9816	2	2.93723	0	7.83306	21.6662	0.111579	0.559155	8	19.98	32	0.000156674	0.217728	0	1		2
682	2018	36.9914	2	3.36412	4.14313	-0.285912	22.0399	0.090507	0.525186	9	20.27	32	0.000208899	0.453093	0	1		2
683	2011	11.9097	1	3.63661	1.09861	0.38461	22.2731	0.081687	0.316218	8	20.27	32	0.000156674	0.21557	0	1		1
683	2012	10.7162	1	2.56274	1.09861	0.88091	21.2928	0.045543	0.34582	17		31	0.000156674	0.093777	0	1		1
683	2013	10.5654	1	2.61458	1.38629	0.81122	21.3401	0.049521	0.471518	17		31	0.00301563	0.059903	0	1		1
683	2014	11.4645	1	2.62916	1.38629	-0.368824	21.3534	0.04846	0.500115	17		31	9.35473e-05	0.014858	0	0		1
683	2015	11.2443	1	2.67393	1.94591	0.079002	21.3941	0.044952	0.606634	9	24.94	31	9.35473e-05	0.03695	0	0		1
683	2016	13.5793	1	2.67626	1.94591	0.215494	21.3962	0.053101	0.551137	9	24.94	31	0.000438503	0.002123	0	0		1
683	2017	7.23933	1	2.78333	2.70805	0.456535	21.4929	0.052963	0.563378	8	24.94	31	0.000438503	0.101522		0		1
683	2018	6.08863	1	2.81062	2.83321	0.261705	21.5174	0.061636	0.507263	9	24.25	31	0.000328877	0.024841	0	0		1
683	2019	6.56326	1	2.98398	1.38629	-0.173189	21.6722	0.055063	0.182395	8	24.59	31	0.000548129	0.158717	0	0		1
683	2020	6.26166	1	3.04222	3.91202	-2.29019	21.7238	0.04987	0.477586	9	24.7	31	0.000411097	0.052938	0	0		1
683	2021	5.3304	1	3.03666	1.79176	-0.550521	21.7188	0.032412	0.203394	9	24.7	31	0.000411097	-0.004904	0	0		1
683	2022	3.70438	1	3.11989	3.93183	0.009296	21.7922	0.037629	0.188458	9	24.85	31	0.000411097	0.076153	0	0		1
683	2023	5.56618	2	3.17385	4.92725	-0.024115	21.8396	0.030606	0.172735	9	24.85	31	0.000308319	0.04851	0	0		2
691	2020	4.69372	1	3.12954	4.7362	-0.060254	21.8007	0.042913	0.164593	9	24.97	31	0.000723946	-0.038141	0	0		1
691	2021	4.39168	1	3.14118	2.19722	-0.229416	21.8109	0.05357	0.185305	9	24.97	31	0.000723946	0.010282	0	0		1
691	2022	4.32725	1	3.17395	0	-0.224903	21.8397	0.037499	0.243844	9	24.97	31	0.000724016	0.029164	0	0		1
691	2023	4.85841	1	3.50885	4.69135	-0.172642	22.13	0.032141	0.038644	9	17.37	31	0.000543012	0.336802	0	1		1
697	2017	10.4346	1	3.74312	0	0.386977	22.3294	0.036506	0.132907	9	17.37	31	0.000543209	0.220701	0	1		1
697	2018	9.79558	1	3.8859	5.31812	-0.463893	22.4495	0.0364	0.14363	9	17.37	31	0.000482859	0.102754	0	1		1
697	2019	3.96913	1	3.87494	5.57215	2.22544	22.4404	0.020117	0.185643	9	17.37	31	0.000543209	-0.009136	0	1		1
697	2020	3.94487	1	3.86575	0	-2.67726	22.4326	0.015587	0.103933	9	17.37	31	0.000543258	-0.007682	0	1		1
697	2021	12.5911	2	3.89899	1.38629	-0.072794	22.4605	0.004022	0.132907	9	17.37	31	0.000362172	0.028244	0	1		2
698	2011	3.96112	1	3.91029	2.07944	-0.147593	22.47	-0.047979	0.193416	10		31	0.000591547	0.009505	0	1		1
700	2011	10.75	1	3.35357	2.07944	-1.18421	22.0308	0.002672	0.157795	7		32	0.000351121	0.132215	0	1		1
700	2012	10.8231	1	2.99739	2.07944	-0.503937	21.7195	-0.372102	0.082814	7		32	0.000363229	-0.223663	0	1		1
700	2013	9.14667	2	3.19483	1.09861	0.56593	21.8929	0.001018	0.169193	11	38.35	32	0.000282723	0.013988	0	1		2
700	2014	7.99075	1	3.09475	1.38629	0.080793	21.8053	-0.049679	0.271796	10	38.35	32	0.000367542	-0.083904	0	1		1
700	2015	11.138	1	3.00304	3.58352	-1.13987	21.7245	0.017992	0.2488	10	38.35	32	0.00128212	-0.077635	0	1		1
700	2016	10.0344	1	2.955	0	-0.56911	21.682	0.049488	0.141789	11	23.68	32	0.000818543	-0.090878	0	1		1
700	2017	8.81056	1	3.02886	0	-0.083527	21.7473	0.023583	0.281264	11	18.677	32	0.000818543	0.067518	0	1		1
700	2018	10.6704	1	2.93928	5.11799	8.79818	21.668	0.07516	0.09108	11	18.68	32	0.000335769	-0.076226	0	1		1
700	2019	10.6634	1	2.86614	0.693147	6.00275	21.6029	0.059482	0.103304	11	18.68	32	0.000335769	-0.06302	0	1		1
700	2020	10.1657	1	2.76981	3.82864	-0.135779	21.5167	0.031833	0.141944	11	18.68	32	0.000196581	-0.082618	0	1		1
700	2021	12.1937	2	2.8694	5.38907	-0.284273	21.6058	0.031285	0.110558	11	18.78	32	0.000259486	0.093236	0	1		2
700	2022	14.2311	2	3.39522	1.60944	0.922483	22.0667	0.047887	0.065222	11	56.09	32	0.000259486	0.58546	0	1		2
700	2023	7.65808	2	3.41751	4.29046	-0.27904	22.0859	0.041	3.68647	11	56.09	32	0.000259486	0.019377	0	1		2
703	2011	8.60788	1	3.49228	5.65249	-0.204609	22.1501	0.041274	18.8203	11	56.17	32	0.000194613	0.06627	0	1		1
703	2012	10.1321	1	3.20825	1.79176	-0.977654	21.9046	0.080334	12.3658	11	52.4	32	0.000168738	-0.217615	0	1		1
703	2013	9.91086	1	3.54729	4.68213	2.69665	22.1971	0.015261	5.7767	8	52.38	32	0.00017013	0.339684	0	1		1
703	2014	12.2374	1	2.90289	5.97126	0.560813	21.6357	-0.492713	9.57648	9	52.28	32	0.000127596	-0.429603	0	1		1
703	2015	12.4956	1	2.84704	1.94591	2.46541	21.5859	-0.004327	20.0245	9	52.28	32	0.000127596	-0.048575	0	1		1
703	2016	6.08434	1	2.882	4.81218	-2.77585	21.6171	0.034975	0.474972	9	42.28	32	0.000127596	0.031684	0	1		1
703	2017	13.1028	1	2.84964	0	-11.9378	21.5882	-0.008565	1.29331	9	42.28	32	0.000127595	-0.028457	0	1		1
703	2018	12.1064	1	1.3413	0	-1.01885	20.1629	0.026167	0.884987	11	39.86	32	0.000127595	0.021714	1	1		1
703	2019	13.9201	1	1.3141	0	-7.98291	20.1356	0.013965	0.540671	11	30.62	32	3.91824e-05	-0.024635	1	1		1
703	2020	14.0812	1	1.31962	5.23111	311.564	20.1412	0.013807	0.294677	13	71.42	32	2.93868e-05	0.015007	1	1		1
703	2021	15.007	2	1.35005	0	-0.627308	20.1717	0.031469	0.029378	7	70.77	32	2.93868e-05	0.031018	1	1		2
703	2022	15.3354	2	1.31351	0	-1.10414	20.135	0.003233	0.04922	7	70.77	32	3.91824e-05	-0.036014	1	1		2
703	2023	11.3285	5	1.32182	5.77144	-3.69466	20.1434	0.00381	0.264689	7	70.77	32	2.93868e-05	0.008386	1	1		5
707	2011	19.7653	3	1.69062	0	0.237774	20.5082	0.011702	0.05867	9	63.63	32	1.66946e-05	0.44019	1	1		3
707	2012	28.7513	3	1.88887	5.99396	0.501258	20.6997	0.142953	0.071057	9	63.63	32	1.49107e-05	0.164674	1	1		3
707	2013	23.284	3	2.28352	0	0.529124	21.0723	0.02001	0.778065	9	28.68	32	7.97888e-05	0.451492	1	1		3
707	2014	28.7721	3	2.22404	0	-0.452292	21.0169	0.035788	0.956322	9	26.37	32	7.97888e-05	-0.053928	1	1		3
707	2015	20.299	2	2.12484	0	38.37	20.9238	0.03182	0.324349	9	26.37	32	7.97888e-05	-0.088824	1	1		2
707	2016	12.3478	2	2.21666	0	1.54398	21.01	0.010999	0.29756	8	25.37	32	6.44494e-05	0.089939	1	1		2
707	2017	7.98559	4	3.10461	3.04452	0.317947	21.814	0.044177	0.577945	9		32	7.18722e-05	0.014156	1	1		4
707	2022	6.53808	2	3.18693	3.2581	0.582164	21.886	0.047364	0.546371	9		32	6.42888e-05	0.074746	1	1		2
707	2023	6.66705	2	3.28682	4.8752	1.45638	21.973	0.011831	1.79829	9		32	6.42888e-05	-0.13215	1	1		2
710	2011	4.06081	3	3.21896	5.63835	0.376382	21.914	0.011491	0.982363	7		32	5.89359e-05	-0.057296	1	1		3
710	2012	2.00944	1	2.84069	2.48491	0.632849	21.5802	0.030363	0.71802	7	51	32	5.89359e-05	-0.283799	1	1		1
710	2013	1.34708	1	2.86616	4.11087	0.035884	21.6029	0.032032	0.524298	7	51	32	6.03098e-05	0.023003	1	1		1
710	2014	1.22037	1	2.95227	5.97126	-0.230403	21.6795	0.016364	0.317823	9	51	32	4.12573e-05	0.079613	1	1		1
710	2015	2.1283	1	2.69242	6.21661	-0.374344	21.447	0.025199	0.455045	9	45.81	32	6.28991e-05	-0.349063	1	1		1
710	2016	3.85201	1	2.72614	0	-0.095987	21.4774	0.032381	0.410583	8	45.81	32	5.36101e-05	0.030884	1	1		1
725	2011	16.532	2	2.72179	0	0.315533	21.4735	0.041971	1.12846	8	41.52	32	5.36101e-05	-0.003911	1	1		2
725	2012	19.6729	2	0.835346	0	-0.286296	18.2659	0.083443	0.591323	6	41.52	43	5.36101e-05	-0.508808	1	1		2
725	2013	20.1574	1	3.19752	0	0.24622	22.2739	0.099171	0.269002	8	41.52	43	2.29234e-05	0.074913	1	1		1
725	2014	24.5415	2	3.15633	0	-0.450977	22.2389	0.10129	0.032677	9	41.52	43	2.42417e-05	-0.034393	0	1		2
725	2015	27.2712	2	3.44157	0	-0.181094	22.4794	0.062451	0.037632	9	41.52	43	2.02014e-05	0.271924	0	1		2
725	2016	30.186	2	4.07195	0	-0.212125	22.9967	0.054297	0.392568	9	41.52	43	1.91029e-05	0.079386	0	1		2
725	2017	33.6523	2	4.1613	0	1.6321	23.0686	0.035842	0.653113	7	41.52	43	1.9408e-05	0.074484	0	1		2
725	2018	34.5523	2	3.97385	0	1.63589	22.9174	0.022357	0.68713	9	41.52	43	1.9408e-05	-0.14026	0	1		2
725	2019	33.5854	2	4.91993	0	-0.093483	23.6647	0.020098	0.676594	9	41.52	43	2.02014e-05	1.11125	0	1		2
725	2020	34.8634	2	5.05532	2.30259	1.67908	23.7687	0.009443	0.649099	10	41.52	43	2.02014e-05	0.109528	0	1		2
725	2021	36.9914	4	4.92992	1.09861	0.422838	23.6724	-0.261189	0.701695	8	41.52	43	2.02014e-05	-0.091755	0	0		4
725	2022	33.6542	5	4.58682	4.14313	-0.405774	23.4059	-0.177294	0.638149	10	25.14	43	2.01913e-05	-0.233956	0	0		5
725	2023	28.3279	4	4.28251	1.38629	-1.38644	23.1655	-0.017807	0.459463	10	25.14	43	1.99622e-05	-0.052473	0	0		4
727	2011	1.87279	1	1.71317	0	1.88617	20.4911	0.067525	1.35105	8	25.04	31	1.99622e-05	0.040682	0	0		1
727	2012	3.27557	1	1.77742	0	0.429665	20.5537	0.095779	1.04266	9		31	1.88738e-05	0.093975	0	0		1
727	2013	3.22694	2	1.86735	0	-2.55287	20.6406	0.10864	0.658278	10		31	1.16265e-05	0.090828	0	0		2
727	2014	4.38081	1	2.00023	0	0.541318	20.7679	0.113421	0.341958	12		31	1.16265e-05	0.135803	0	1		1
727	2015	2.65692	1	2.20641	0	-11.7089	20.9629	0.139118	0.50017	10	23.97	31	0.00032	0.215286	0	1		1
727	2016	12.9204	1	2.45455	0	0.712785	21.1936	0.146981	0.569212	9	23.97	31	0.00028	0.259444	0	1		1
727	2017	14.2662	1	2.79992	0	3.20172	21.5078	0.129407	0.513649	11	23.97	31	0.00028	0.369121	0	1		1
727	2018	14.5055	2	3.10052	0	-0.315962	21.7752	0.118115	0.565144	11	13.47	31	0.000324494	0.308159	0	1		2
727	2019	14.8928	1	3.73207	0	-1.026	22.3201	0.093886	0.277775	11	13.47	31	0.000223338	0.624311	0	1		1
727	2021	17.495	4	3.96533	2.83321	-6.99056	22.5159	0.101442	0.233565	11	13.47	31	0.000223338	0.216355	0	1		4
727	2022	21.6425	6	4.25546	3.09104	0.486043	22.7558	0.121359	0.187527	11	13.47	31	0.00022334	0.271043	0	1		6
727	2023	13.2884	6	4.47001	3.98898	-0.527296	22.9305	0.1332	1.28391	11	13.47	31	0.000182114	0.190993	0	1		6
731	2011	11.5118	1	4.66821	2.48491	-0.514171	23.0901	0.148398	0.913098	11	13.47	31	0.000152474	0.173035	0	1		1
731	2012	6.24206	1	4.9056	1.09861	1.7395	23.279	0.180224	1.48368	11	13.47	31	0.000152474	0.192217	0	1		1
731	2013	20.3022	1	5.20904	2.70805	-0.321801	23.517	0.152823	3.52412	11	13.47	31	0.000152472	0.268647	0	0		1
731	2014	12.0124	1	5.42353	1.09861	0.02011	23.6829	0.142843	3.2342	10	13.47	31	0.000152472	0.180499	0	1		1
731	2015	19.0748	1	5.74134	2.56495	-0.749737	23.9255	0.119207	3.05815	11	13.47	31	0.000152472	0.274518	0	1		1
731	2016	4.67269	1	5.89952	0	-0.515032	24.0448	0.113078	4.736	11	13.47	31	0.000137985	0.126731	0	1		1
731	2017	20.3418	1	6.02257	2.07944	2.96881	24.137	0.108295	3.87982	11	13.47	31	0.000137985	0.096564	0	1		1
731	2018	12.8968	1	6.6909	1.79176	0.624208	24.6284	0.084036	3.977	10	13.47	31	0.000137985	-0.079528	0	1		1
731	2019	14.1521	1	6.83799	0	-0.219457	24.7346	0.099802	3.71376	10	13.47	31	0.00102957	0.111994	0	0		1
731	2020	13.1135	1	6.76241	2.19722	-0.517941	24.6801	0.053475	4.03328	9	13.47	31	0.00128422	-0.053001	0	1		1
731	2021	14.9145	2	2.75004	0	0.351997	21.4989	0.073798	4.70764	9	13.47	32	0.00123184	0.484698	0	1		2
731	2022	16.9424	2	2.78551	4.60517	-0.036204	21.5308	0.076875	3.71201	9		32	0.00123184	0.032369	0	1		2
731	2023	8.47005	4	2.83688	0	0.57073	21.5768	0.086893	2.4157	9		32	0.00124334	0.047083	0	1		4
733	2011	3.01706	1	2.86765	0	1.12795	21.6043	0.093798	2.35039	9		32	0.00124334	0.027859	0	0		1
733	2012	1.54954	1	2.91733	4.85981	0.304755	21.6485	0.092122	2.31626	9	21.12	32	0.00119736	0.04524	0	0		1
733	2013	2.78214	1	2.93558	0	-2.32835	21.6647	0.086129	2.07598	9	29.76	32	0.00122654	0.016347	0	0		1
733	2014	2.69198	1	2.97658	0	0.516343	21.7011	0.089658	1.78552	9	29.76	32	0.00127434	0.037022	0	1		1
733	2015	4.95359	1	3.25458	0	-0.741157	21.945	0.12643	1.58416	9	25.51	32	0.00128446	0.257552	0	1		1
733	2016	4.52815	1	3.0474	0	-0.313683	21.7636	0.079655	1.67315	9	25.51	32	0.00132589	-0.165847	0	1		1
733	2017	3.89166	1	3.11177	1.79176	0.446023	21.8202	0.075536	0.772756	9	25.51	32	0.00211535	0.058239	0	1		1
733	2018	12.8024	1	3.16153	0	0.692427	21.8638	0.086653	0.665975	8	19.19	32	0.00214373	0.044555	0	1		1
733	2019	12.5482	1	3.17136	0	-0.981833	21.8724	0.094207	0.928586	9	46.16	32	0.00357518	0.008632	0	1		1
733	2020	11.6876	1	3.27318	0	-31.0137	21.9611	0.116067	0.488894	8	37.3	32	0.00359543	0.092763	0	1		1
733	2021	14.2106	3	3.24805	0	-0.487767	21.9393	0.074778	0.355352	9	37.3	32	0.00193607	-0.021603		1		3
733	2022	15.2903	3	3.36597	1.09861	-0.995847	22.0415	0.071364	0.062762	9	37.3	32	0.00193607	0.107572	0	1		3
733	2023	8.1708	3	3.93388	0	2.49614	22.523	0.006231	0.057285	9	37.3	32	0.00145205	0.618618	0	1		3
737	2012	4.2685	1	3.94413	1.09861	1.35357	22.5316	0.175939	0.029779	9	37.3	32	0.00145205	0.008576	0	1		1
737	2013	4.35096	1	3.85778	1.38629	2.11659	22.4595	0.131403	0.009998	9	37.3	32	0.00145205	-0.069565	0	1		1
737	2014	4.15256	1	3.8392	0	-0.084857	22.4439	0.067849	0.058285	9	34.26	32	0.00193607	-0.015442		0		1
737	2015	5.41533	1	3.95881	1.09861	0.627033	22.5438	0.049141	0.002912	9		32	0.0015411	0.105049	0	1		1
737	2016	5.90676	1	4.34999	1.09861	-0.308955	22.8656	0.037816	0.001044	9		32	0.0015411	0.315127	0	0		1
737	2021	9.31978	2	4.51023	0	0.053491	22.9953	0.027558	0.003	9		32	0.000711835	0.138538		0		2
737	2022	7.66088	2	0.837733	1.09861	0.122682	19.6463	0.014303	0.004601	7		32	0.000711835	0.01652	0	1		2
737	2023	7.3719	2	0.809283	0	16.1001	19.6164	-0.031721	0.003585	7	24.95	32	0.00691349	-0.006362	0	1		2
738	2011	9.4082	1	0.920403	2.99573	-20.1956	19.7328	0.00873	0.74524	7	24.95	32	0.00709359	0.128475	0	1		1
738	2012	10.6198	1	0.988208	0	-0.416948	19.8032	0.018261	0.304633	6	24.95	32	0.00709359	0.072945	0	1		1
738	2013	11.4558	2	1.10829	2.99573	9.25607	19.9268	0.028836	0.314622	6	19.96	32	0.00709736	0.131584	0	1		2
738	2014	10.7452	1	0.899186	3.09104	-0.263617	19.7107	-0.348257	0.236222	6	19.96	32	0.00710229	-0.194383	0	1		1
738	2015	10.5831	1	0.852861	0	-1.25254	19.6622	-0.103551	0.836608	5	19.96	32	0.00739424	-0.0473	0	1		1
738	2016	2.72025	1	0.872597	3.09104	-0.780987	19.6829	0.009403	0.267661	5	19.96	32	0.00739424	0.020825	0	0		1
738	2017	3.09864	1	0.504228	3.04452	-4.23501	19.2905	-0.065571	0.211813	5	19.96	32	0.0165151	-0.324539	0	1		1
738	2018	4.58063	1	0.444181	1.09861	-0.329947	19.2252	-0.21175	0.242215	5	24.54	32	0.0153816	-0.063239	0	1		1
738	2019	4.2287	1	2.08172	4.31749	-1.84847	20.8832	0.080896	0.198347	5	22.15	32	0.0154289	0.003875	0	1		1
738	2020	5.68881	1	2.72024	2.3979	-0.261541	21.4721	0.01972	0.245251	5	21.64	32	7.70669e-05	0.801988	0	1		1
738	2021	12.1268	1	2.91839	3.78419	0.06665	21.6494	0.051957	0.422083	5	19.05	32	5.77995e-05	0.194056	0	1		1
738	2022	14.8248	2	2.99234	4.11087	1.21732	21.715	0.044809	0.349097	4	8.12	32	5.76441e-05	0.067775	1	1		2
738	2023	8.43035	4	3.01571	0	-0.400936	21.7357	0.060252	0.373784	5	8.12	32	5.76441e-05	0.020877	1	1		4
739	2011	11.5191	2	3.16082	2.63906	5.89913	21.8632	0.032637	0.556404	5	8.12	32	6.17967e-05	0.136028	1	1		2
739	2012	10.74	2	3.1478	4.07754	3.75199	21.8518	0.008091	0.223168	5	7.42	32	6.17967e-05	-0.011326	0	1		2
739	2013	10.889	2	3.07022	4.27667	2.33664	21.7837	-0.086651	0.224515	5	8.99	32	6.17967e-05	-0.065831	0	1		2
739	2014	9.52002	1	3.14307	3.43399	0.417725	21.8477	0.03486	0.384642	5	9.43	32	4.51886e-05	0.066039	0	1		1
739	2015	9.42326	1	1.95025	4.51086	0.386808	20.7202	0.04171	0.398275	7		31	4.51886e-05	0.313735	0	1		1
739	2016	9.43722	1	2.04792	4.48864	0.2022	20.8133	0.025052	0.554883	5		31	3.40074e-05	0.106571	0	1		1
739	2017	11.3552	1	2.11632	4.18965	1.0113	20.8781	0.007506	0.470548	9		31	9.1347e-05	0.06693	0	1		1
739	2018	3.18787	1	2.15217	5.0626	0.868493	20.9119	0.010025	2.05165	9	41.03	31	9.86737e-05	0.034405	0	1		1
739	2019	3.77635	2	2.03301	4.75359	0.57782	20.7991	0.014406	2.43863	9	41.03	31	6.26703e-05	-0.106656	0	1		2
739	2020	3.93767	2	2.04948	0	0.294529	20.8148	-0.020215	1.00833	9	41.03	31	5.37682e-05	0.015776	0	1		2
739	2021	7.27594	1	1.98534	3.89182	-0.266017	20.7537	0.031525	1.36018	9	41.03	31	0.000153715	-0.059236	0	1		1
739	2022	13.3277	1	2.81509	5.37064	-0.438517	21.5214	0.018969	2.8716	9	41.03	31	0.000277658	1.11369	0	1		1
739	2023	13.0991	1	2.30568	4.77068	0.220531	21.0557	0.03851	2.04908	9	41.03	31	0.000265764	-0.372312		1		1
755	2011	5.90763	4	2.51862	4.02535	-3.00216	21.2525	0.054438	1.0649	7	41.03	31	0.000253868	0.21745	0	1		4
755	2012	8.77828	4	2.62711	5.60212	1.7413	21.3515	0.02755	0.909329	7	41.03	31	0.000279381	0.10415	0	1		4
755	2013	9.2388	4	2.79427	4.5326	3.28208	21.5027	0.06152	0.447938	7	41.03	31	0.000111075	0.163198	0	1		4
755	2015	10.2823	4	2.98491	3.85015	-0.269252	21.673	0.056733	0.528373	7	41.03	31	0.000111477	0.185645	0	1		4
755	2016	11.8521	4	3.09022	5.73657	-0.577323	21.7661	0.055183	0.199285	7	41.03	31	0.000111477	0.097592	0	1		4
755	2018	10.2002	4	3.32462	4.92725	-0.992187	21.9711	0.065813	0.489649	7	41.03	31	0.00010106	0.22747	0	1		4
756	2011	17.8957	1	4.11238	3.21888	-0.624064	22.638	0.031859	0.66427	9	41.03	31	0.000105121	10.8887	0	1		1
756	2012	12.7047	2	4.14067	5.78074	-3.17918	22.6614	0.040252	0.830092	9	41.03	31	8.88767e-05	0.007079	0	1		2
756	2013	19.8435	3	4.25372	5.09375	-1.1042	22.7543	0.040525	1.03266	9	41.03	31	5.11784e-06	0.097437	0	1		3
756	2014	14.0535	2	4.50179	3.3322	-0.633499	22.9563	0.054428	1.25778	9	41.03	31	3.83838e-06	0.192374	0	0		2
756	2015	19.1775	3	4.69108	5.8861	-0.158349	23.1084	0.066527	1.10883	9	41.03	31	2.881e-06	0.164385	0	1		3
756	2016	15.5943	2	4.86114	4.99043	-1.10382	23.2438	0.070214	0.906836	9	41.03	31	2.881e-06	0.144968		1		2
756	2017	16.8514	4	5.00795	3.95124	-0.365437	23.3597	0.046806	0.925691	8	41.03	31	2.16075e-06	0.122863	1	1		4
756	2018	12.8555	1	3.38406	5.97889	0.496112	22.0225	0.029574	1.24365	11		31	2.16075e-06	-0.138737	1	1		1
756	2019	18.4629	2	3.35703	5.23644	2.41295	21.9992	0.086719	1.22079	11		31	2.16075e-06	-0.02311	0	1		2
756	2020	14.5481	2	3.42616	4.04305	-89.7028	22.0589	0.128132	1.28413	9		31	2.06359e-05	0.06154	0	1		2
756	2021	26.8012	4	3.52309	6.1181	-0.689019	22.1422	0.10073	1.17958	9	27.52	31	2.16075e-06	0.086869	0	1		4
756	2022	18.8295	1	3.66483	1.94591	-8.37743	22.2631	0.110793	0.921821	9	27.52	31	2.75146e-05	0.12851	0	1		1
756	2023	14.8175	3	3.80209	1.09861	63.2166	22.3791	0.11995	1.04388	9	27.52	31	0.000834667	0.123069	0	1		3
757	2013	1.22037	1	3.98888	2.89037	-0.513767	22.5355	0.126619	1.009	9	20.15	31	0.00194578	0.152821	1	1		1
757	2014	7.52116	1	3.957	1.38629	1.01431	22.509	0.133703	0.983024	9	20.02	31	0.00177017	-0.026219	0	1		1
757	2015	8.47108	1	4.35712	1.09861	-2.10789	22.8388	0.130228	0.822514	9	20.02	31	0.00177017	0.390787	0	1		1
757	2016	8.80025	1	4.73377	0.693147	1.6888	23.1425	0.15546	0.601224	9	20.02	31	0.00177017	0.354864	0	1		1
757	2017	9.52495	1	4.79717	2.83321	-2.0623	23.193	0.160817	0.665804	9	20.02	31	0.00177017	0.051802	0	1		1
757	2018	9.17315	1	4.92805	0	-0.856917	23.2967	0.117441	0.668309	9	20.02	31	0.00092127	0.105021	0	1		1
766	2011	2.55678	1	5.2202	3.04452	-0.169959	23.5256	0.104193	0.559855	9	20.15	31	0.00092127	0.257212	0	1		1
766	2012	2.09458	1	5.43732	3.04452	0.483219	23.6935	0.108114	0.823577	9	20.15	31	0.00109265	0.182704	0	1		1
766	2013	2.45558	1	5.53733	0	-0.234992	23.7702	0.105557	0.638491	9	20.15	31	0.00109573	0.079717	0	1		1
766	2014	2.28758	1	5.73634	2.07944	-3.41179	23.9217	0.05381	0.321551	9	20.15	31	0.00109719	0.16356	0	1		1
766	2015	9.97291	1	5.83471	2.19722	-0.385132	23.996	0.026188	0.451408	9	20.15	31	0.00109719	0.077161	0	1		1
766	2016	11.3397	1	5.67592	1.38629	-6.74081	23.8759	0.003925	0.366284	10	77.33	31	0.00109719	-0.113222	0	1		1
766	2017	10.431	1	5.72578	0.693147	-0.951403	23.9137	0.006083	0.539738	9	74.02	31	0.00104656	0.038553	0	1		1
766	2018	4.00583	1	5.92252	2.30259	-6.38321	24.0621	0.019539	0.668987	9	74.02	31	0.00104656	0.159954	0	1		1
766	2019	11.2915	1	1.24	2.19722	1.3899		0.021782	0.92059	9	72.88	31	0.00104656	-0.064789	0	1		1
766	2020	11.8614	1	2.64053	0.693147	2.53905	21.3637	0.008923	1.39503	7	78.47	31	0.00109149	0.061176	0	1		1
766	2021	10.321	1	2.48289	2.48491	16.4522	21.2197	0.00537	0.485388	6		31	0.000912228	-0.110254	0	1		1
766	2022	10.8508	1	2.45395	0	-1.55459	21.193	-0.071046	0.365152	8		31	0.000816511	-0.026274	0	1		1
766	2023	4.07451	1	2.44435	0	0.490572	21.1842	0.000219	0.16785	9		31	0.000929469	-0.007529	0	0		1
768	2011	2.72991	2	2.42247	0	-0.347837	21.164	0.002568	0.484969	10	58.52	31	0.000935336	-0.019978	0	1		2
768	2012	8.95379	1	2.49933	4.70953	-1.34704	21.2348	0.003941	0.88756	11	58.52	31	0.000921466	0.061376	0	1		1
768	2013	9.01901	1	2.46575	3.82864	-0.097165	21.2039	0.016769	0.797717	10	58.52	31	0.00106592	-0.030396	0	1		1
768	2014	9.35489	1	2.54602	4.60517	-0.804076	21.2776	0.01863	0.916066	10	61.05	31	0.000685612	0.071145	0	1		1
768	2015	9.88308	1	2.72563	3.55535	-0.368611	21.4409	0.082514	0.696233	10	61.05	31	0.00063923	0.177381		1		1
768	2016	11.3481	2	2.71999	4.70953	-0.519437	21.4358	0.009412	0.545027	10	61.05	31	0.000686201	-0.00508		1		2
768	2017	11.5563	2	2.70678	4.21951	-0.488843	21.4238	0.011698	0.36165	10	61.05	31	0.000515432	-0.011875	1	1		2
768	2018	10.9595	2	2.85028	5.45959	-0.54078	21.553	0.023469	0.296835	10	51.53	31	0.000515432	0.08491	0	1		2
768	2019	10.5259	2	2.90402	4.84419	1.92199	21.601	0.043412	0.400316	7	51.53	31	0.000530777	0.04922	0	1		2
768	2020	5.05883	2	3.03749	3.49651	-0.687275	21.7196	0.118149	0.322663	8	51.53	31	0.000469397	0.125869	0	1		2
768	2021	4.48982	2	3.12842	5.73334	-0.372372	21.7997	0.167428	0.733721	8	51.53	31	0.000695317	0.083459	0	1		2
768	2022	11.4043	2	3.14497	4.80402	-0.034785	21.8143	0.04768	0.444	7	51.53	31	0.000646476	0.014644	0	1		2
768	2023	11.6677	3	3.14788	4.38203	-0.337574	21.8168	-0.024956	0.386261	7	51.53	31	0.000404687	0.002558	0	1		3
777	2011	2.3315	1	6.38101	5.78996	-0.582042	24.4024	0.039024	0.245653	6	51.53	31	0.000404687	0.085536	0	1		1
777	2012	1.57044	1	6.487	4.86753	-0.790149	24.4801	0.056116	0.33226	5	56.5	31	0.000410014	0.080744	0	1		1
777	2013	3.02297	1	6.56408	4.58497	-0.598337	24.5363	0.006117	0.234803	5	56.51	31	0.000410014	0.026144	0	1		1
777	2014	2.40774	1	6.60922	4.91265	-1.58146	24.5692	0.007537	0.162209	5	56.51	31	0.000408784	0.033388	0	1		1
777	2015	4.07918	1	6.70687	3.95124	0.21313	24.64	0.003251	0.075609	5	63.76	31	0.000405537	0.07338	0	1		1
777	2016	11.7383	1	2.44927	5.95584	1.68438	21.1887	0.091909	0.075371	9	63.97	31	0.000360661	0.15544	0	1		1
777	2017	12.0112	1	2.73602	3.93183	-1.43669	21.4502	0.065303	0.363507	9		31	0.000340136	0.298899	0	1		1
777	2018	12.5998	1	2.94763	4.96981	-0.965399	21.6399	0.063352	0.310063	11		31	0.000364005	0.212253	0	1		1
777	2019	14.0155	2	3.1943	3.93183	-1.06988	21.8575	0.055077	0.257617	9		31	0.000305287	0.243142	1	1		2
777	2020	15.1475	3	3.59815	4.80402	-0.648276	22.2063	0.04326	0.174191	9	42.31	31	0.000305284	0.459939	1	1		3
777	2021	15.9125	2	3.74263	2.48491	-3.0185	22.329	0.037072	0.457276	9	42.31	31	0.000308882	0.130491	1	1		2
777	2022	6.79744	2	3.78859	0	-0.045339	22.3678	0.042319	0.535342	9	42.31	31	0.000328401	0.039546	1	1		2
777	2023	6.38834	2	3.85818	4.64439	7.22155	22.4263	0.070154	0.258013	9	42.31	31	9.04099e-05	0.062136	1	1		2
782	2011	2.92802	1	3.92524	2.56495	0.314211	22.4825	0.056332	0.275427	9	42.31	31	6.923e-05	0.057774	1	1		1
782	2012	10.4722	1	3.92559	4.59512	-0.44004	22.4827	0.051788	0.213443	9	42.31	31	6.923e-05	0.000291	1	1		1
782	2013	3.43402	1	4.32481	4.92725	1.01944	22.8125	0.058474	0.282357	9	42.31	31	6.923e-05	0.390605	1	0		1
782	2014	2.44227	1	4.43052	1.79176	-0.553672	22.8985	0.057858	0.835537	9	41.73	31	7.525e-05	0.089859	0	0		1
782	2015	4.26926	1	4.39633	4.61512	0.377326	22.8708	0.044579	0.946081	9	41.68	31	7.52499e-05	-0.080017	0	0		1
782	2016	3.73643	1	4.55573	2.63906	0.170024	22.9998	0.061956	0.055588	9	41.69	31	7.52491e-05	0.032818	0	0		1
782	2017	12.0148	1	4.80601	1.60944	0.033697	23.2001	0.065718	0.049565	9	41.69	31	7.5249e-05	0.221753		1		1
782	2018	11.284	1	4.89237	2.63906	-0.962293	23.2685	0.065783	0.008982	9	40.64	31	7.3744e-05	0.070878	0	1		1
782	2019	12.0392	1	4.76464	4.7362	-0.280005	23.1672	0.077317	0.681124	9		31	7.6754e-05	-0.10398	0	1		1
782	2020	11.5399	1	4.76591	2.70805	0.594192	23.1682	0.080103	0.572448	8		31	7.6754e-05	0.00101	0	1		1
782	2021	13.1088	2	4.82127	4.86753	0.243421	23.2122	0.062125	0.378261	9		31	0.0226861	0.045017	0	1		2
782	2022	13.8258	2	4.81916	2.89037	0.489009	23.2105	0.045383	0.524382	9	49.6	31	0.0226861	-0.001677	0	1		2
782	2023	6.44316	2	5.1404	3.09104	-0.303676	23.4635	0.028637	0.439143	9	49.6	31	0.0181633	0.287816	0	1		2
788	2011	8.82197	1	5.24625	3.17805	0.243305	23.5459	0.041688	0.494303	9	49.6	31	0.0181633	0.085908	0	1		1
788	2012	7.8277	1	2.44674	1.79176	-0.844877	21.2232	0.007757	0.386394	13	40.53	32	0.0127236	-0.062402	0	1		1
788	2013	9.23816	1	2.21497	4.85981	-0.112814	21.0084	-0.243762	0.454483	13	40.53	32	0.0100322	-0.18405	0	1		1
788	2014	9.08367	1	2.34879	3.2581	-0.603666	21.1329	-0.200343	0.35944	13	40.53	32	0.0100322	0.132554	0	1		1
788	2015	10.0273	1	2.17639	2.70805	-0.990782	20.9723	0.080104	0.543344	9	40.53	32	0.0097763	0.130043	0	1		1
788	2016	9.70822	1	2.29263	1.09861	0.481592	21.0808	0.08543	0.330103	9	40.53	32	0.0097763	0.114613	0	1		1
788	2017	10.4355	1	2.42985	3.04452	-0.068792	21.2077	0.019826	0.310616	8	40.53	32	0.00796935	0.135285	0	1		1
788	2018	9.99531	1	2.45853	2.83321	-0.438595	21.234	0.018063	0.911829	9	40.54	32	0.00883664	0.026719	0	1		1
788	2019	10.4034	1	2.60547	0	0.81509	21.3682	0.022533	0.85744	9	40.54	32	0.00536747	0.143624		1		1
788	2020	10.0495	1	2.79743	2.77259	0.103982	21.5415	0.041193	0.89387	9	40.54	32	0.00435882	0.189137		1		1
788	2021	4.1171	1	2.81796	2.19722	0.094501	21.5598	0.045914	0.816403	9	40.55	32	0.00435882	0.018558	0	1		1
788	2022	2.90664	1	3.02547	0	-0.15199	21.7443	0.032028	0.67603	8	40.55	32	0.00425275	0.202552	0	1		1
788	2023	2.91593	1	3.07834	0	56.6611	21.7909	0.034104	0.679723	9	40.55	32	0.00318996	0.047678	0	1		1
790	2015	11.7726	1	3.19734	0	0.089352	21.8951	0.030114	0.843087	9	40.55	32	0.00329055	0.109878	0	1		1
790	2016	11.0145	1	3.314	0	0.035526	21.9965	0.030871	0.399992	9	40.55	32	0.00320253	0.097071	0	1		1
790	2017	10.6524	1	3.41234	0	0.937084	22.0814	0.029378	0.172679	9	40.55	32	0.00320253	0.088604	0	1		1
790	2018	10.7129	1	1.17448	0	-0.072891	19.9944	0.005803	0.84113	6	40.55	32	0.00320432	0.247555	0	1		1
790	2019	11.1414	1	1.16714	0	0.334716	19.9869	0.004793	1.28883	7		32	0.00319719	0.023572	0	0		1
790	2020	3.66957	1	1.17944	0	-2.51292	19.9994	0.015881	0.185122	9		32	0.00386682	0.014501	0	1		1
790	2021	6.08956	1	1.2498	0	-0.565377	20.0708	0.010675	0.588868	9	19.65	32	0.00095872	0.077073	0	1		1
790	2022	4.81517	1	1.28393	3.66356	-0.195366	20.1052	0.006254	0.314484	9	20.34	32	0.00115445	0.035059	0	1		1
790	2023	4.64404	1	1.31415	2.77259	-0.73005	20.1357	0.002326	0.340997	9	20.34	32	0.000909211	0.030893	0	1		1
791	2011	5.67723	4	1.34517	3.4012	0.182683	20.1668	0.011069	0.509545	9	19.61	32	0.000912157	0.031628	0	1		4
792	2011	9.81246	2	1.89872	0	-1.1222	20.7091	0.027891	1.22792	9	19.8	32	0.000909653	0.713265	0	0		2
792	2012	9.77444	2	2.15612	0	-0.197836	20.9533	0.018944	0.966968	9	19.66	32	0.000909211	0.276477	0	0		2
792	2013	10.5803	2	2.32011	4.40672	0.291804	21.1063	0.132645	1.26345	9	21.68	32	0.000214168	0.165367	0	0		2
792	2014	11.3245	2	2.2873	0	-5.72246	21.0758	-0.00902	1.09525	9	21.68	32	1.61317e-05	-0.030008	0	1		2
792	2015	11.488	1	1.90141	2.48491	-2.57231	20.7117	-0.213743	1.03007	9	21.68	32	1.61317e-05	-0.305173	0	1		1
792	2016	16.2822	2	1.96374	1.94591	-0.926853	20.7713	0.055027	1.38001	9	22.48	32	1.61317e-05	0.061352		1		2
792	2017	23.1893	4	1.88111	1.94591	-65.132	20.6923	0.037821	0.082229	9	29.61	32	1.86362e-05	-0.075964	0	1		4
792	2018	20.9152	4	1.86349	2.77259	-0.156756	20.6754	0.046775	0.009546	9	34.08	32	1.83416e-05	-0.020005	0	1		4
792	2021	28.6606	2	1.97532	0	-0.735127	20.7823	0.136285	0.018865	8	27.87	32	0.000574097	0.11626	0	1		2
792	2022	26.318	2	2.21717	0	-0.466359	21.0104	0.167695	0.117349	9	24.99	32	0.000575716	0.256263	0	1		2
792	2023	20.182	5	2.3944	0	0.616761	21.175	0.051638	0.155591	9	16.91	32	0.000301257	0.17887	0	1		5
800	2011	5.56203	3	2.32159	2.83321	0.050372	21.1077	0.03079	0.132945	9	22.23	32	0.000299982	-0.065126	0	1		3
800	2012	6.56624	4	2.37194	4.68213	0.352259	21.1543	0.04218	0.163373	9		32	0.000353725	0.047711	0	0		4
800	2013	11.6504	3	2.40642	3.43399	0.166524	21.1861	0.03467	0.150134	9		32	0.000163846	0.032332	0	0		3
800	2014	10.6276	2	2.41892	0	-0.016825	21.1976	0.04435	1.24809	8		32	0.000147285	0.011585	0	0		2
800	2015	12.624	2	1.7871	3.46574	-0.124045	20.6018	-0.061069	0.601555	9		32	6.42747e-05	-0.031866	0	1		2
800	2016	5.63234	2	0.991098	0	-0.434739	19.8062	-0.662047	0.418515	9	69.56	32	9.69473e-05	-0.433671	0	1		2
800	2017	7.05101	3	1.22032	0	-2.13466	20.0409	0.047137	0.642128	9	69.56	32	9.69473e-05	0.02408	0	0		3
800	2018	8.30911	3	1.31087	4.41884	-0.608853	20.1324	0.052036	0.790473	9	60.43	32	9.69473e-05	0.095734	0	0		3
800	2019	15.4477	3	1.44875	0	0.717036	20.2702	-0.047423	0.569177	9	58.35	32	1.12452e-05	0.115497	0	1		3
800	2020	11.4083	3	1.59513	1.60944	0.74957	20.4148	0.064321	0.675852	9	53.52	32	3.37357e-07	0.154735	0	1		3
800	2021	7.71877	3	1.73873	0	-0.209628	20.5549	0.08482	0.435797	9	53.52	32	0.00161207	0.150427	0	1		3
800	2022	8.98835	3	1.99245	0	0.631682	20.7986	0.03485	0.121836	9	21.52	32	0.00161176	0.275934	0	1		3
800	2023	9.79553	3	2.66947	0	-1.20948	21.4262	0.054033	0.076246	9	21.52	32	4.73272e-06	0.832608	0	1		3
801	2011	15.2656	1	3.01952	0	0.408246	21.739	0.028655	0.117271	9	21.52	32	5.04537e-06	0.36725	0	1		1
801	2012	11.1771	1	3.28105	3.2581	0.004051	21.968	0.029313	0.45931	9	21.46	32	8.80038e-05	0.257252	0	0		1
801	2013	11.5005	1	3.34618	3.43399	-0.348772	22.0244	0.046446	0.35753	9	21.39	32	9.32022e-05	0.058025	0	0		1
801	2014	12.4671	1	3.67884	2.07944	-0.210084	22.3089	0.040493	0.500107	9	25.72	32	0.00021478	0.329078	0	0		1
801	2015	12.5977	1	4.49837	3.73767	-0.382671	22.9858	0.016585	0.451231	9	26.61	32	0.00133615	0.96782	0	1		1
801	2016	13.0035	1	4.61448	3.98898	-0.351834	23.0791	0.007699	0.315267	9	28.11	32	0.00133615	0.09785	0	0		1
801	2017	18.0733	1	4.58929	2.70805	2.32311	23.0589	0.009898	0.277103	9	26.02	32	0.001013	-0.020001	0	0		1
801	2018	10.7076	1	4.64137	3.7612	-0.735239	23.1007	-0.018062	0.644682	9	26.02	32	0.001013	0.042619	0	1		1
801	2019	14.5661	1	4.58238	1.09861	-1.47287	23.0534	-0.063678	0.24978	8	26.02	32	0.00102538	-0.046182	0	1		1
801	2020	14.3905	1	4.32719	3.7612	-0.311444	22.847	-0.191041	0.44015	9	26.02	32	0.00102538	-0.186445	0	1		1
801	2021	14.5752	2	2.7595	1.09861	11.2428	21.4353	0.083033	0.545861	6		30	0.00126098	0.114736	0	1		2
801	2022	19.5903	2	2.82068	3.52636	0.028049	21.4905	0.038699	0.439509	6		30	0.00126098	0.062311	0	1		2
801	2023	10.6873	1	2.97226	2.70805	-0.839285	21.6262	0.021124	0.600386	7		30	0.00120663	0.145338	0	1		1
803	2018	2.88468	1	3.05157	3.66356	0.760212	21.6966	0.014815	1.20269	9		30	0.00120663	0.072983	0	1		1
810	2014	13.0704	2	2.99008	2.63906	0.057773	21.6421	0.015598	1.74622	9	40.92	30	0.0396182	-0.053115	0	1		2
810	2015	14.7062	1	3.05301	1.60944	-4.42022	21.6979	0.016621	1.40626	8	40.92	30	0.038396	0.057445	0	1		1
810	2016	13.7503	1	3.3418	1.09861	-0.428265	21.9513	0.097893	1.30432	9	31.43	30	0.038175	0.288326	0	0		1
810	2017	14.6698	1	3.66068	1.60944	5.87641	22.2255	0.171831	1.93437	9	31.43	30	0.0377451	0.29899	0	1		1
810	2018	15.1704	1	3.80887	1.60944	-3.2946	22.3511	0.248777	1.93474	11	31.43	30	0.0373738	0.133842	0	1		1
810	2019	14.9137	1	4.0008	0	1.68931	22.5121	0.282726	1.72948	11	30.02	30	0.0374759	0.174675	0	1		1
810	2020	15.5519	1	4.35685	2.19722	-1.14317	22.806	0.284155	1.43689	11	30.02	30	0.0242388	0.341581	0	1		1
810	2021	17.0336	3	4.90537	2.30259	-8.27367	23.2472	0.244894	1.49314	11	30.02	30	0.0242416	0.55455	0	1		3
810	2022	18.1319	3	5.18723	3.63759	136.72	23.4688	0.291693	1.22432	11	30.02	30	0.0242416	0.248112	0	1		3
810	2023	18.2617	3	5.02693	0.693147	-1.00425	23.3432	0.257568	0.157169	11	30.02	30	0.00240364	-0.118069	0	1		3
811	2011	1.44123	1	4.97378	3.46574	-21.3523	23.3013	0.074108	0.234304	10	30.02	30	0.0023688	-0.052914	0	1		1
811	2012	2.06712	1	4.97482	0.693147	-1.48355	23.3021	0.117642	0.269836	10	30.43	30	0.00236393	0.000824	0	1		1
811	2013	2.85226	1	5.02134	1.60944	-0.289417	23.3388	0.142584	0.428845	11	30.43	30	0.00242148	0.035567	0	1		1
811	2014	5.27921	2	5.4945	0	-1.5208	23.7067	0.13171	0.433657	11	30.43	30	0.00242148	0.414607	0	1		2
811	2015	6.35499	2	5.67066	4.8828	-0.556805	23.8414	0.155296	0.586049	11	30.43	30	0.00242148	0.14422	0	1		2
811	2016	5.63227	2	5.99684	5.20401	-1.02092	24.0878	0.16052	0.63536	11	30.43	30	0.00238376	0.279366	0	1		2
811	2017	6.56485	3	6.25341	5.57973	-1.29553	24.2789	0.170199	0.603992	11	30.43	30	0.00253594	0.210555	0	1		3
811	2018	6.81201	3	6.5397	5.64545	-0.595107	24.4894	0.183683	0.749303	11	32.26	30	0.00253594	0.234298	0	1		3
811	2019	16.0094	3	3.39466	0	-1.16948	21.9971	0.008211	0.669353	7		30	0.00260858	0.047011	0	1		3
811	2020	7.48672	3	3.16539	5.84064	-33.8778	21.7971	-0.1469	0.460176	7		30	0.00224621	-0.171035	0	1		3
811	2021	5.84619	1	2.83638	0	0.7418	21.5046	-0.244897	0.565774	7	42.44	30	0.00224787	-0.253576	0	1		1
811	2022	7.15617	1	2.65544	5.94803	-0.363247	21.3409	0.024632	0.552652	9	57.82	30	0.002102	-0.046257	0	1		1
811	2023	7.03889	2	2.64126	0	0.267652	21.328	0.025692	0.423344	9	57.82	30	0.00193905	-0.012837	0	1		2
813	2017	12.0052	1	2.62158	5.96358	-1.07356	21.3101	0.057769	0.480406	7	57.31	30	0.0019696	-0.017792	0	1		1
813	2018	9.5474	1	2.89892	0	4.53479	21.5607	0.073419	0.481503	9	45.28	30	0.00175621	0.183932	0	1		1
813	2019	9.45036	1	2.68076	6.00881	3.77793	21.364	-0.044995	0.256043	9	28.8	30	0.00175621	-0.178614	0	1		1
813	2020	11.5713	1	3.17066	0	-15.4592	21.8017	0.079119	0.503974	9	28.8	30	0.00213242	0.549222	1	1		1
813	2021	12.562	1	3.34455	6.1181	-1.97467	21.9536	0.035624	0.43946	9	28.8	30	0.002222	0.16409	0	1		1
813	2022	4.96779	1	3.14326	2.07944	0.318863	21.7776	0.01891	0.413757	9	28.8	30	0.00115206	-0.161412	0	1		1
813	2023	4.15419	1	3.23711	6.28413	-0.678827	21.86	0.017814	0.35009	9	28.8	30	0.00121634	0.085851	0	1		1
816	2011	5.25729	1	3.20962	2.07944	-1.39274	21.8359	0.024915	0.078699	9	28.8	30	0.00075959	-0.02379	0	1		1
816	2012	6.07859	1	3.25542	0	-0.613398	21.876	0.020737	0.057692	9	28.8	30	0.000726259	0.027396	0	1		1
816	2013	6.18229	1	3.27891	0	-0.755227	21.8965	0.022424	0.411582	9	28.8	30	0.000858872	0.020722	0	1		1
816	2014	10.1178	1	3.44229	0	-0.011712	22.0383	0.017106	0.584116	9	28.8	30	0.000728441	0.152348	0	1		1
816	2015	11.1697	1	3.44285	0	0.055631	22.0388	0.012626	0.786126	9		30	0.00011674	0.000483	0	1		1
816	2016	10.7832	1	3.38543	0	-2.40189	21.9891	0.017641	0.692369	9		30	0.000116726	-0.047497	0	1		1
816	2017	11.2997	1	3.36665	0	-1.49527	21.9728	0.007161	0.660129	8		30	0.000107075	-0.015019	0	1		1
816	2020	8.65769	1	3.51129	0	1.59534	22.0977	0.013229	1.3256	9		30	0.000107	0.133035	0	1		1
816	2021	9.29842	1	3.75355	5.2575	-0.017416	22.3044	0.021178	0.930778	9	35.84	30	0.000106987	0.229557	0	1		1
816	2022	8.58558	1	1.85898	3.09104	-6.94541	20.6325	0.001235	0.802777	9	35.84	31	0.000125632	-0.134394	0	1		1
816	2023	9.42751	1	1.6394	4.91998	0.24629	20.419	-0.172303	0.539831	9	35.84	31	0.000125632	-0.149948	0	1		1
818	2012	11.2194	1	1.63112	0	0.056641	20.4108	0.107143	0.385996	5	19.82	31	0.00012256	0.180748	0	1		1
818	2013	11.3035	1	2.86675	0	0.349434	21.5677	0.043184	0.329593	8	19.82	31	0.00012256	2.17998	0	1		1
818	2014	11.9537	1	4.35448	0	-0.944493	22.8367	0.105181	0.244077	8	19.82	31	0.000121918	2.02206	0	1		1
818	2015	12.0768	1	4.0232	0	-0.95055	22.5641	0.000405	0.251764	8	41.55	31	0.000121877	-0.23861	0	1		1
818	2016	13.0907	1	4.30771	0	-0.659785	22.7985	-0.064286	0.106375	8	41.55	31	0.000121793	0.264203	0	1		1
818	2017	12.2998	1	4.89137	0	0.256395	23.2678	0.040001	0.408212	8	41.55	31	0.000119595	0.598769	0	1		1
818	2018	18.1478	1	4.92693	0	0.034356	23.2959	0.042023	0.194466	8	41.55	31	0.000119551	0.028366	0	1		1
818	2019	13.8598	2	4.88673	1.79176	2.06502	23.2641	0.032325	0.217479	8	41.55	31	0.000124275	-0.031275	0	1		2
818	2020	27.9263	3	4.99508	0	-0.564614	23.3496	0.04061	0.164237	8	41.55	31	0.000124252	0.089251	0	1		3
818	2021	21.1356	1	5.19065	0	-4.48871	23.5026	0.016679	0.185771	8	41.55	31	0.000124202	0.143546	0	1		1
818	2022	23.1203	1	5.28968	0	4.26006	23.5796	0.005863	0.129326	8	41.55	31	0.000124194	0.079945	0	1		1
818	2023	9.45765	2	5.34788	0	-0.475053	23.6246	0.000713	0.140652	9	41.55	31	0.00012419	0.046053	0	1		2
821	2011	10.1881	1	5.16521	0	0.082002	23.4828	-0.089613	0.059309	9		31	0.000124172	-0.132167	0	1		1
821	2012	11.0905	1	4.75815	0	-0.05169	23.162	-0.198401	0.072782	9		31	0.000154618	-0.274465	0	1		1
821	2013	11.5817	1	4.34417	0	-0.560113	22.8283	0.016442	0.057146	9		31	0.000154608	-0.108713	0	1		1
821	2014	15.0952	1	2.53654	0	-0.046034	21.2322	0.016054	1.03364	7	27.86	30	0.000153764	0.127765	0	1		1
821	2015	34.3321	1	2.72618	0	-0.740321	21.4052	0.014051	0.350076	6	27.86	30	0.000153764	0.210979	0	1		1
821	2016	14.7393	1	2.48089	0	-7.63117	21.181	-0.156325	2.31856	7	27.86	30	0.000153748	-0.196109	1	0		1
821	2017	15.7105	1	2.42229	0	-0.550077	21.1268	0.006388	1.07628	9	20.11	30	0.000153653	-0.052713	1	1		1
821	2018	15.39	1	2.39536	0	-0.22731	21.1019	0.001529	1.11594	9	20.11	30	0.000153648	-0.02242	0	1		1
821	2019	14.4933	1	2.27732	0	-0.350008	20.9919	-0.168238	0.857579	9	20.11	30	0.000152502	-0.104171	0	1		1
821	2020	15.65	1	2.14537	0	-0.255795	20.8677	0.010044	0.563592	9	17.63	30	0.000152251	-0.116735	0	1		1
821	2021	13.5795	1	1.99295	0	-0.70976	20.7228	-0.048889	2.27539	8	17.63	30	0.000152249	-0.094751	0	1		1
821	2022	14.6166	1	1.94942	0	0.714866	20.6811	-0.059392	0.43608	6	17.63	30	0.000152249	-0.033471	0	1		1
821	2023	8.24592	2	2.4075	0	-0.417171	21.1131	0.024348	2.15937	7	20	30	0.000152249	0.605371	0	1		2
822	2011	27.6223	1	2.39239	0	0.100455	21.0991	0.006871	1.27655	7	20	30	0.000137698	-0.013923	0	1		1
822	2012	14.2543	1	2.71523	0	-12.0637	21.3952	0.09055	0.596163	7	20	30	0.000137698	0.344632	0	1		1
822	2013	28.3812	1	2.47815	0	-0.781763	21.1785	0.06495	0.871469	7	20.22	30	0.000390089	-0.194894	0	1		1
822	2015	2.56263	1	2.19397	0	2.49846	20.9136	-0.234639	0.514898	7	20.22	30	0.000390089	-0.23268	0	1		1
822	2016	3.45924	1	2.53788	0	-69.404	21.2334	0.064595	0.418966	7	20.22	30	0.000299494	0.376879	0	1		1
822	2017	3.89186	1	2.48442	0	0.521973	21.1843	0.068172	0.335973	7	20.22	30	0.000299494	-0.04799	0	1		1
822	2018	5.41759	2	2.70685	0	0.261011	21.3876	0.355071	0.260834	6	20.22	30	0.000609241	0.225551	0	1		2
822	2019	4.64162	1	2.65538	5.85793	1.38832	21.3409	0.021219	0.267258	7	20.22	30	0.000398454	-0.045705	0	1		1
822	2020	5.95785	1	2.6546	2.63906	0.549232	21.4128	0.067096	0.171282	15	20.23	32	0.000202407	0.185976	0	1		1
822	2021	5.03465	2	2.74916	5.40717	19.1787	21.4981	0.071045	0.19539	14		32	0.000202407	0.089077	0	1		2
822	2022	11.5151	2	2.91034	1.79176	-0.411956	21.6423	0.082668	0.298913	11		32	0.000202407	0.155079	0	1		2
822	2023	11.0799	2	3.06984	0	0.279428	21.7834	0.085365	1.25937	11		32	0.000202407	0.151553	0	1		2
823	2011	5.02006	1	3.49981	0	0.164484	22.1565	0.057461	0.830371	11	18.64	32	0.000206329	0.45223	0	1		1
823	2012	3.94945	1	3.57564	1.09861	0.000754	22.2212	0.050006	0.722624	11	29.99	32	6.61532e-05	0.066883	0	1		1
823	2013	2.71281	1	3.6747	2.48491	0.28477	22.3054	0.025155	1.05005	11	29.99	32	1.79511e-05	0.087761	0	1		1
823	2014	6.09347	1	3.73602	0.693147	-0.224244	22.3572	0.05192	1.20501	11	29.99	32	1.79511e-05	0.053466	0	1		1
823	2015	19.4771	1	3.6081	2.07944	-0.052275	22.2489	0.044979	0.685725	9	38.72	32	8.40836e-06	-0.108778	0	1		1
823	2016	15.1871	1	3.7155	0	0.488002	22.3399	0.09208	0.620996	9	32.75	32	8.07046e-06	0.095254	0	1		1
823	2017	26.9129	1	4.06819	1.60944	-0.163645	22.6345	0.204294	0.136921	9	32.75	32	0.000113537	0.342692	0	1		1
823	2018	28.8005	1	4.26196	2.07944	-0.719456	22.7938	0.15834	0.11852	9	32.76	32	0.000113842	0.17268	0	1		1
823	2019	29.5424	1	4.67335	1.38629	-0.683163	23.1262	0.084501	0.145271	11	32.76	32	0.000118951	0.394334	0	1		1
823	2020	28.0116	1	4.88446	1.09861	-0.510275	23.2939	0.088288	0.086742	11	32.76	32	0.000119275	0.182549	0	0		1
823	2021	11.4705	3	5.01498	2.89037	-0.242247	23.3966	0.109678	0.152368	11	32.76	32	0.000114153	0.108179	0	1		3
823	2022	18.3144	3	5.11798	3.13549	-0.121729	23.4772	0.098876	0.087591	11	32.76	32	0.000139995	0.083894		1		3
823	2023	19.401	3	5.23976	3.17805	0.431577	23.5719	0.099978	0.12015	11	33.08	32	0.000126532	0.099317	0	1		3
830	2011	3.15625	1	5.44547	3.17805	-0.00885	23.7305	0.130849	0.088524	11	33.12	32	0.000126532	0.171876	0	1		1
830	2012	29.2535	1	5.48744	3.3673	-0.201985	23.7626	0.118049	0.154114	11	18.6	32	0.000119019	0.032674	0	0		1
830	2013	13.9526	2	5.66718	3.21888	0.078429	23.8996	0.096114	0.051089	11	18.6	32	0.000142004	0.146769	0	0		2
830	2014	5.0365	1	5.84252	1.60944	0.126889	24.032	0.103205	0.035461	11	18.6	32	7.11687e-05	0.141594	0	0		1
830	2015	15.028	2	5.87235	1.09861	-0.025695	24.0544	0.094719	0.439467	11	14.99	32	6.48676e-05	0.022674	0	0		2
830	2016	17.6212	3	1.43057	3.3322	-0.176349	20.3315	0.030569	0.084791	13	14.99	34	6.48676e-05	-0.076483	0	1		3
830	2017	23.8744	3	1.54285	0	-0.108215	20.442	0.023629	0.294577	12		34	6.48676e-05	0.118895	0	1		3
830	2018	24.6992	2	1.55819	0	-0.582931	20.457	0.021519	0.246504	12		34	1.52676e-05	0.015134	0	1		2
830	2019	31.5088	2	1.76006	0	-0.193862	20.6528	0.039754	0.140399	11	29.29	34	1.73029e-05	0.216346	0	1		2
830	2020	34.437	2	2.03821	0	0.217195	20.9176	0.024929	0.432457	12	21.79	34	1.73029e-05	0.303129	0	1		2
830	2021	15.8385	2	1.98423	0	-0.385348	20.8667	-0.002089	0.480111	12	21.79	34	6.86985e-06	-0.045737	0	1		2
830	2022	15.4659	2	1.98245	1.60944	-0.66904	20.865	0.011654	0.946564	12	22.72	34	6.86985e-06	-0.001675	0	1		2
830	2023	32.4956	2	2.69772	0	0.147815	21.5238	0.145123	0.955469	12	22.96	34	5.15239e-06	0.195029	0	1		2
836	2011	3.75558	2	2.96065	0	-0.441977	21.7577	0.025007	0.368962	9	20.68	34	5.15239e-06	0.263525	0	0		2
836	2012	2.37641	2	2.87478	1.60944	2.20739	21.6818	0.011719	0.236021	9	20.68	34	5.15239e-06	-0.073122	0	0		2
836	2013	2.61443	1	3.21041	0	-2.74781	21.9761	0.046545	0.103985	9	20.68	34	3.86429e-06	0.342237	0	0		1
836	2014	1.39473	1	3.27216	1.38629	2.98283	22.0295	0.003181	0.146989	9	20.68	34	8.94035e-07	0.054906		1		1
836	2015	4.36478	1	3.28178	2.30259	-1.66233	22.0378	0.008734	0.061773	9	20.68	34	8.94035e-07	0.008343	0	1		1
836	2016	13.1295	1	3.23951	1.38629	-0.601785	22.0013	0.115232	1.23031	9	20.68	34	0.000191524	-0.035881	0	1		1
836	2017	16.8297	3	3.20732	2.19722	0.785042	21.9734	0.046816	0.745654	9	20.68	34	0.043242	-0.027513	0	1		3
836	2018	16.1368	4	3.01624	1.38629	0.169564	21.8066	0.004593	0.290955	9	20.68	34	0.043169	-0.153635	0	0		4
836	2019	8.42344	4	2.70591	4.02535	-0.348561	21.5311	-0.223798	0.153976	8	20.68	34	0.0382885	-0.240788	0	0		4
836	2020	8.90493	3	3.26684	2.3979	-0.224266	22.0249	0.031394	0.129236	9	20.68	34	0.0381521	0.638556	0	1		3
836	2021	8.21847	3	3.50145	4.29046	-0.144397	22.2262	0.026554	0.147835	9	20.68	34	0.0381521	0.222923	0	1		3
836	2022	5.85965	3	3.51167	1.94591	-1.32843	22.2349	0.010655	0.12168	8		34	0.00286096	0.008738	0	1		3
836	2023	7.7858	3	3.63093	3.68888	-1.03322	22.336	0.001857	0.338815	9		34	0.00286102	0.106398	0	1		3
837	2011	9.58737	1	3.5801	3.09104	-1.5766	22.293	-0.125753	0.397661	9		34	0.00286102	-0.042094	0	1		1
837	2012	9.8864	1	1.05545	0	-0.685498	20.036	-0.111897	0.360265	9	40.99	36	0.00313482	-0.072926	0	1		1
837	2013	10.0748	1	0.840482	2.99573	-1.49481	19.8159	-0.120182	0.353031	9	29.95	36	0.00211538	-0.197569	0	1		1
837	2014	9.51724	1	1.54312	0	-1.77609	20.5203	0.04632	0.243847	15	29.95	36	0.00189582	0.087865	0	1		1
837	2015	10.7201	1	1.45731	0	-1.11319	20.4365	-0.022278	0.255276	14	29.95	36	0.00185469	-0.080372	0	1		1
837	2016	9.67579	1	1.51609	0	-1.17464	20.494	0.00712	0.212825	9	37.04	36	0.00185469	0.059141	0	1		1
837	2017	11.9933	1	1.35768	2.83321	-2.39956	20.3385	-0.076272	0.253621	9	37.04	36	0.00153308	-0.12455	0	1		1
837	2018	14.7741	2	1.06858	0	-7.78347	20.0493	-0.237963	0.305157	9	37.04	36	0.00124968	-0.251132	0	1		2
837	2019	14.9689	2	1.08612	0	-0.881919	20.0671	0.043544	0.423668	5	37.04	36	0.00124027	-0.019309	0	1		2
837	2021	13.4801	1	1.07719	3.3673	1.15194	20.058	0.016658	0.35998	5	37.04	36	0.00115801	-0.008994	0	1		1
837	2022	13.354	1	1.02869	3.3322	-6.73259	20.0088	0.034589	0.173189	5		36	0.000819154	-0.048006	0	1		1
837	2023	4.33254	1	1.12129	3.21888	-1.71313	20.1026	0.016599	0.328436	5		36	0.000819313	0.098273	0	1		1
852	2011	4.16398	1	1.10807	0	-1.09891	20.0892	0.033478	0.019619	5		36	0.0011934	-0.01324	0	1		1
852	2012	8.54548	1	1.14676	1.09861	-17.7453	20.1282	0.006879	0.063629	5	51	36	0.000992142	0.039756	0	1		1
852	2013	4.1955	1	1.1631	1.38629	3.34238	20.1447	0.001688	0.062729	5	51	36	0.000992142	0.016565	0	1		1
852	2014	7.06943	1	1.22976	2.48491	-0.043055	20.2114	-0.003116	0.053287	5	51	36	0.000937291	0.069043	0	1		1
852	2015	6.39162	1	1.27203	1.09861	2.39607	20.2536	0.009379	0.068411	5	33.36	36	0.000996479	0.043045	0	1		1
852	2016	5.00678	1	1.03145	5.31321	1.46957	20.0116	0.046408	0.131652	5	33.36	36	0.000955524	-0.214886		1		1
852	2017	6.78315	1	1.0792	4.74493	0.796571	20.0601	0.054488	0.111808	5	33.36	36	0.000942419	0.049613	0	1		1
852	2018	6.43342	2	1.46193	0	-0.165555	20.3624	0.080066	0.099017	7	33.36	34	0.000944247	0.108418		0		2
852	2019	4.25919	2	1.59359	0	0.312918	20.4916	0.048869	0.00917	9	33.36	34	0.000889386	0.142054	0	1		2
852	2020	13.7994	2	1.70503	0	-0.123296	20.5998	-0.080986	0.005461	9	33.84	34	0.00101892	0.12342	0	1		2
852	2021	13.1683	2	1.77602	0	0.537091	20.6682	-0.134963	0.202562	9	33.84	34	0.000808529	0.070818	0	1		2
852	2022	15.6271	3	2.54963	0	-0.37526	21.3902	0.092251	0.098628	9	33.84	34	0.000808599	0.407986	0	1		3
852	2023	11.5515	6	2.69192	0	-0.318033	21.5186	0.066722	0.126853	8	25.2	34	0.000755257	0.137013	0	1		6
856	2012	1.22037	1	2.97915	7.09091	-0.294845	21.774	0.050694	0.116765	8	25.33	34	0.000700391	0.290992	0	1		1
856	2013	3.24436	1	5.29066	0	-0.46674	23.673	0.01607	0.108017	8	25.33	34	0.000755257	5.67928	1	1		1
856	2014	1.25694	1	6.06362	1.09861	-0.241507	24.2568	0.03287	0.248622	9	25.33	34	0.000832423	0.79286	0	1		1
856	2015	4.96053	1	6.13402	2.07944	-0.213499	24.3089	0.030763	0.14768	9	25.33	34	0.00084591	0.05348	0	1		1
856	2017	2.6844	1	5.93222	0	-0.492645	24.1591	-0.09893	0.14046	9	25.33	34	0.0007424	-0.139116	0	1		1
856	2018	4.44982	1	5.49272	0	0.614808	23.8278	-0.289864	0.113426	7	24.63	34	0.000744229	-0.282042	0	1		1
856	2019	8.09077	1	3.00564	4.85203	-12.9496	21.5846	0.00678	0.116124	7	27.76	28	0.00073602	0.09946	0	1		1
856	2020	3.95269	2	3.02489	4.99721	-1.92173	21.6018	-0.032038	0.139334	6		28	0.000347027	0.018961	0	1		2
856	2021	3.66114	1	3.01936	2.94444	0.528376	21.5969	0.011458	0.176645	7		28	0.000354109	-0.004931	0	1		1
856	2022	11.2184	1	3.1651	2.63906	1.71871	21.7263	0.013946	0.137783	8		28	0.00047816	0.1382	0	1		1
856	2023	11.7819	1	3.32327	5.04343	-26.44	21.8654	0.007023	0.289734	8	21.44	28	0.00216296	0.149189	0	1		1
862	2011	5.09238	1	3.33976	5.1299	0.529963	21.8798	0.015252	0.513449	8	21.44	28	0.00260263	0.014522	0	1		1
862	2012	3.55307	1	3.36219	4.54329	-1.61816	21.8994	0.01849	0.384586	8	21.44	28	0.00260263	0.019774	0	1		1
862	2013	11.9534	1	3.45743	5.93754	-0.96683	21.9822	0.024653	0.162443	8	16.37	28	0.00192617	0.075637		1		1
862	2014	9.0861	1	3.61027	5.50533	1.30384	22.114	0.012152	0.146987	8	17.99	28	0.00182286	0.140942	0	1		1
868	2011	16.1897	1	3.69911	4.86753	-19.708	22.1901	0.083912	0.214327	10	18.01	28	0.00144059	0.079026	0	1		1
868	2012	14.8659	1	3.97563	4.86753	4.8059	22.4242	0.022806	0.281376	10	18.01	28	0.00145369	0.263715	0	1		1
868	2013	18.9553	1	4.28095	6.15698	-0.115539	22.6781	0.013589	0.289205	10	18.01	28	0.00144964	0.289081	0	1		1
868	2014	14.2997	1	4.22347	5.27811	-0.130082	22.6306	0.019072	0.213089	10	18.02	28	0.00144964	-0.046349		1		1
868	2015	13.5671	1	4.36559	5.27811	0.813096	22.7477	0.023027	0.073424	10	18.02	28	0.00129272	0.124161	0	1		1
868	2016	14.371	1	4.67416	5.37064	0.342542	22.9985	0.017161	0.098034	10	18.39	28	0.00129272	0.285129	0	1		1
868	2017	14.8293	1	4.84684	5.58725	0.285474	23.137	-0.023131	0.028529	10	18.61	28	0.0123266	0.148539	0	1		1
868	2018	16.0359	2	4.76032	6.57368	0.093472	23.0678	0.001416	0.045877	10	18.61	28	0.0135199	-0.066882	0	1		2
868	2021	12.4797	2	4.67225	5.8999	-0.925769	22.997	-0.022818	0.103888	10	29	28	0.0131642	-0.068357	0	1		2
868	2022	18.5567	2	4.76665	6.56103	0.68835	23.0729	0.008412	0.085591	10	29.41	28	0.0131642	0.07883	0	1		2
868	2023	15.1859	2	4.77137	5.93754	-0.023385	23.0766	0.012874	0.106966	8	29.41	28	0.00935752	0.00379	0	1		2
880	2011	14.0883	1	4.88448	0	0.472581	23.167	0.098858	0.019843	9	29.41	28	0.00834678	0.094591	0	1		1
880	2012	8.60587	1	5.02509	1.38629	-0.112867	23.2786	0.028721	0.045601	10	29.41	28	0.00863266	0.118051	0	1		1
880	2013	11.7311	1	1.48966	1.09861	-0.061049	20.2711	0.047417	0.030733	7		31	0.0086237	0.066012	0	1		1
880	2014	13.1297	2	1.57894	1.60944	-27.5366	20.3595	-0.090873	0.115903	7		31	0.00696303	0.146704	0	1		2
880	2015	6.58897	2	1.6216	1.38629	-1.06324	20.4015	0.002079	0.736138	7		31	0.00696601	0.042891	0	1		2
880	2016	5.92128	1	1.56442	1.09861	-18.2863	20.3452	-0.0405	0.230603	7	47.76	31	0.00666297	-0.054771	0	1		1
880	2017	13.3327	2	1.55173	2.07944	-0.420402	20.3326	0.007049	0.150346	7	47.76	31	0.00696601	-0.012453	0	1		2
880	2018	9.82988	2	1.53358	0	-1.56177	20.3147	0.005438	0.481836	7	47.76	31	0.00696601	-0.0178	0	1		2
880	2019	8.43493	2	1.33555	1.09861	-0.009923	20.117	0.003559	0.726118	7	24.57	31	0.00697021	-0.179397	0	1		2
880	2020	18.4555	1	1.34141	1.09861	0.694364	20.1228	0.037401	2.25038	6	37.78	31	0.00697021	-0.023973	0	1		1
880	2021	18.3414	2	1.40769	0	0.718186	20.1894	0.03475	2.04227	7	37.78	31	0.00697021	0.06878	0	1		2
880	2022	22.8348	3	1.28137	0	-0.093177	20.0623	-0.170756	2.12993	7	37.78	31	0.00697021	-0.119355	0	1		3
880	2023	15.5214	3	1.37729	0	3.69912	20.1589	0.082909	1.31755	7	37.78	31	0.00348233	0.101468	0	1		3
881	2018	10.7196	2	1.43486	1.38629	1.22916	20.2165	0.119734	0.013797	7	29.97	31	0.00512652	0.059303	0	1		2
881	2019	11.3445	2	1.59195	1.38629	-1.45271	20.3723	0.195459	0.004131	7	29.97	31	0.00512652	0.168584	0	1		2
881	2020	13.6506	3	1.34859	2.70805	1.55332	20.1301	-0.297615	0.00549	7	53.43	31	0.00513151	-0.215131	0	1		3
881	2021	12.8276	2	1.40855	1.38629	1.22603	20.1902	-0.146161	0.013136	7	54.43	31	0.00542199	0.062	0	1		2
881	2022	12.251	2	1.48081	2.19722	29.3973	20.2623	0.079451	0.009723	7	52.99	31	0.00540209	0.073616	0	1		2
881	2023	6.88059	3	1.81317	1.09861	-0.411396	20.5883	0.011337	0.012236	7	52.13	31	0.00542516	0.385389	0	1		3
893	2020	11.7445	1	1.74346	2.94444	-0.007848	20.5207	-0.046755	0.007585	7	34.99	31	0.00601578	-0.065394	0	1		1
893	2021	12.885	2	1.78078	3.49651	-4.29012	20.5569	0.050124	0.020441	7		31	0.0036533	0.036916	0	1		2
893	2022	12.0073	2	1.83475	2.19722	0.209191	20.6092	0.025469	0.058782	7		31	0.0035197	0.053633	0	1		2
893	2023	3.71606	2	1.91933	3.29584	0.48055	20.6906	0.036616	0.144147	7		31	0.00177951	0.084815	0	1		2
901	2011	12.9563	2	2.18824	2.48491	0.165125	20.8326	0.00172	0.009051	11	65.96	28	0.000268313	-0.013494	0	1		2
901	2012	15.6261	2	2.19727	3.43399	-0.944331	20.8411	0.001468	0.11342	11	65.96	28	0.000228153	-0.040714	0	1		2
901	2013	15.7316	2	2.09854	0	0.795224	20.7472	-0.076971	0.012691	9	61.15	28	0.000223976	-0.084575	0	1		2
901	2014	22.895	2	2.02309	0	-0.235056	20.675	0.002986	0.172938	9	61.15	28	0.000171113	-0.069711	0	1		2
901	2015	21.3328	2	1.99741	2.77259	-13.1313	20.6503	0.005401	0.009316	9	61.15	28	0.000175529	-0.024392	0	1		2
901	2016	20.0474	1	1.98138	1.79176	-6.40912	20.6348	0.008203	0.045781	9	57.75	28	0.000118752	-0.015315		1		1
901	2017	18.075	2	2.02795	2.70805	0.428415	20.6796	0.010797	0.075256	9	53.89	28	7.43743e-05	0.045812	0	1		2
901	2018	18.0947	2	1.9966	3.04452	2.18666	20.6495	0.044139	0.872962	9	53.89	28	7.43743e-05	-0.052813	0	1		2
901	2019	23.0519	1	1.99457	3.09104	0.104161	20.6475	0.024533	0.229475	9	53.89	28	7.43742e-05	-0.00195	0	1		1
901	2020	26.1881	2	1.92679	2.99573	1.21104	20.5821	-0.139116	0.284632	7	53.88	28	8.67744e-05	-0.063343	0	1		2
901	2021	23.8461	2	1.76577	3.13549	17.6437	20.4252	-0.210628	0.356302	9	53.89	28	8.67743e-05	-0.145197	0	1		2
901	2022	21.7569	2	2.1302	0	2.29755	20.7774	-0.11331	0.225345	11	53.89	28	3.71759e-05	0.253129	0	1		2
901	2023	21.1967	3	2.12059	0.693147	-2.46632	20.7683	0.019681	0.314403	11	53.89	28	2.7908e-05	-0.009116	0	0		3
902	2014	4.95312	1	2.27351	0	19.3331	20.9132	-0.113502	0.454913	11	53.89	28	3.72109e-05	0.155935	1	0		1
902	2015	23.45	4	2.26595	0	14.5302	20.9061	-0.070327	0.679888	11	53.89	28	1.16817e-05	-0.007096	1	1		4
902	2016	20.7646	2	2.71996	2.48491	1.43197	21.3268	-0.053116	0.800132	9	53.89	28	6.13059e-06	-0.027011	1	1		2
902	2017	23.7227	3	2.52187	2.19722	-0.409543	21.145	-0.21254	1.41613	9		28	0.000328333	-0.166276	1	1		3
902	2018	25.5333	4	2.40131	2.48491	-0.849047	21.033	-0.129654	1.25272	6		28	0.000320009	-0.138935	1	1		4
902	2019	17.0483	4	2.56605	1.09861	-0.133691	21.1858	0.09245	0.642594	7		28	0.000320009	0.028876	1	1		4
902	2020	22.4132	4	2.52004	2.89037	-13.4173	21.1433	0.043901	0.312144	7	60.08	28	0.000211121	-0.041592	1	1		4
902	2021	25.8555	2	2.55149	2.19722	0.525802	21.1723	0.029538	0.455737	9	60.08	28	0.00010677	0.029481	1	1		2
902	2022	25.449	3	2.54736	3.61092	0.687329	21.1685	0.012818	0.200382	9	60.08	28	9.65615e-05	-0.00381	1	1		3
902	2023	13.28	2	2.4843	2.30259	-0.735194	21.1102	-0.122615	0.325294	9	47.51	28	8.22473e-05	-0.056668	1	1		2
903	2011	9.34169	1	2.41794	3.80666	2.19262	21.0485	0.024431	0.194281	8	47.75	28	3.47796e-05	0.014426	1	1		1
903	2012	12.7288	1	2.5183	0	1.79942	21.1417	0.022688	0.693291	9	52.44	28	3.47796e-05	0.097657	1	1		1
903	2013	12.7633	1	2.38483	4.79579	-3.62604	21.0176	0.104344	1.25607	9	51.67	28	3.47796e-05	-0.223693	1	1		1
903	2014	16.1828	1	2.73743	4.35671	-251.863	21.3427	0.168875	0.127307	8	32.47	28	3.47794e-05	0.383035	1	1		1
903	2015	17.2867	1	3.67356	4.31749	-3.11214	22.1683	0.133525	0.124386	9	32.47	28	3.47793e-05	1.28309	1	1		1
903	2016	18.2894	4	3.93797	0	-7.89513	22.3925	0.136694	0.191413	9	22.5	28	3.47479e-05	0.25138	1	1		4
903	2017	13.8758	2	4.04714	4.41884	5.04813	22.484	0.10693	0.239158	8	22.5	28	5.61111e-05	0.095854	1	1		2
903	2018	17.7753	3	4.16438	0	-0.884826	22.5817	0.093091	0.298801	9	23.01	28	5.61109e-05	0.10256	1	1		3
903	2019	20.1741	2	4.3015	0	-1.07004	22.695	0.099619	0.181158	9	21.46	28	5.61099e-05	0.120001	1	1		2
903	2020	19.2205	3	4.54092	0	17.8065	22.8907	0.097333	0.153776	9	21.5	28	4.76038e-05	0.216208	1	1		3
903	2021	22.996	2	4.72698	4.49981	4.5239	23.041	0.116739	0.233439	9	21.05	28	4.6289e-05	0.162159	0	1		2
903	2022	10.5437	2	4.98867	0	-5.31097	23.2498	0.139163	0.588739	9	26.02	28	1.32175e-05	0.232158	0	0		2
903	2023	13.7789	2	5.11954	4.91265	1.47432	23.3531	0.155559	0.484427	9	24.41	28	0.000267293	0.108823	0	0		2
908	2014	1.76804	1	5.23507	0	-0.718184	23.4437	0.121679	0.231746	9	24.36	28	8.47281e-06	0.094824	0	1		1
908	2015	8.27721	1	3.02107	0.693147	1.50256	21.705	0.010806	0.204825	9	32.88	31	8.47281e-06	0.027264	0	1		1
908	2016	9.45021	1	3.05725	0	-2.09689	21.737	0.003654	0.313206	9		31	8.47301e-06	0.075536	0	1		1
908	2017	11.0932	1	3.02605	0	-3.79052	21.7095	0.003765	0.371185	9		31	8.47193e-06	-0.022761	0	1		1
908	2018	12.6455	2	2.95701	0	-88.9172	21.6482	0.003434	0.329372	3		31	1.12971e-05	-0.059398	0	1		2
908	2019	12.776	2	2.91739	0	-1.35241	21.6129	0.003339	0.297643	3	47.86	31	1.35739e-06	-0.034658	0	1		2
908	2020	14.6382	3	2.85281	1.60944	0.376192	21.5552	0.00581	0.203202	9	47.86	31	8.76618e-07	-0.053232	0	1		3
908	2021	11.5247	1	2.80809	2.3979	0.037123	21.5151	0.00889	0.120988	9	23.42	31	8.76618e-07	-0.039318	0	1		1
908	2022	12.806	1	3.17296	1.94591	0.666202	21.8388	0.015401	0.103924	8	23.42	31	8.76618e-07	0.356017	0	1		1
909	2011	1.88357	1	3.51497	4.14313	-0.550215	22.1352	0.087217	0.096806	9	23.42	31	6.34922e-05	0.345006	0	1		1
912	2011	3.73883	1	3.97994	2.56495	-2.66008	22.5281	0.078317	0.148881	9	20.31	31	6.37844e-05	0.481224	0	1		1
912	2012	17.5179	3	3.88286	4.34381	-0.524599	22.447	0.010217	0.165969	9	20.31	31	6.37844e-05	-0.078047	0	1		3
912	2013	4.57662	2	3.93849	2.56495	0.070782	22.4935	-0.06526	0.297214	9	20.31	31	6.94406e-05	0.047634	0	1		2
912	2014	4.64215	2	3.96292	4.47734	-0.915915	22.5139	0.000906	0.07957	8	20.31	31	6.94406e-05	0.020572	0	1		2
912	2016	13.6228	2	4.24286	2.48491	0.294523	22.7454	-0.021868	0.043015	9	20.31	31	0.000133979	0.260512	0	1		2
912	2019	10.5543	3	4.39769	4.58497	0.070324	22.8719	0.009777	0.077942	9	20.31	31	0.000133979	0.134788	0	1		3
912	2020	8.40692	3	4.41477	2.3979	-4.75195	22.8857	-0.045113	0.090119	9	22.71	31	0.000137992	0.01397	0	1		3
912	2021	32.2272	2	4.56174	4.69135	1.54512	23.0046	0.002691	0.049685	9	23.38	31	0.000203453	0.126239	0	1		2
912	2022	7.20086	2	4.65988	2.48491	2.93469	23.0835	0.00869	0.062898	9	23.38	31	0.000106683	0.082029		1		2
912	2023	8.48043	2	4.78637	4.7185	-3.30917	23.1845	0.017184	0.158138	9	23.87	31	0.000128196	0.106268		1		2
913	2011	11.2193	2	4.87168	1.38629	-27.4316	23.2522	0.013592	0.180498	9	25.74	31	4.57575e-05	0.070066		1		2
913	2012	10.9099	2	4.83348	4.82028	3.94099	23.2219	0.00089	0.08192	11	25.96	31	9.09091e-05	-0.029836	0	1		2
913	2013	16.6191	2	4.93462	2.56495	0.226244	23.3019	0.007242	0.08487	11	32.19	31	0.000123636	0.083335	0	1		2
913	2014	10.3153	1	2.02044	0.693147	0.364188	20.6724	0.036467	0.092896	7		28	9.27273e-05	0.761217	0	1		1
913	2015	6.81839	1	2.5988	4.92725	0.013711	21.2159	0.03314	0.197683	9		28	9.27273e-05	0.740764	0	1		1
913	2017	11.8596	1	2.5619	2.63906	0.354305	21.1819	0.035448	0.280317	8		28	0.000111273	-0.033403	0	1		1
913	2018	7.30227	2	2.86168	5.03695	-0.155667	21.4553	0.026564	0.329268	9		28	0.000111273	0.314449	0	1		2
913	2019	6.46088	2	3.06741	2.83321	-3.17048	21.6397	0.01718	0.187014	9	52.34	28	0.000111273	0.202415	0	1		2
913	2020	11.3697	2	3.14609	4.5326	-0.616473	21.7095	0.023036	0.057971	9	52.34	28	0.000148364	0.072306	0	1		2
913	2021	21.3304	2	3.19424	4.72739	-0.13476	21.752	0.014724	0.177131	9	52.34	28	2.4955e-05	0.043459	0	1		2
913	2022	22.3962	2	3.5088	0	18.2746	22.0266	0.024506	0.220539	9	29	28	0.0343938	0.294136	0	1		2
913	2023	13.0575	5	3.59257	0.693147	-0.385793	22.0988	-0.082663	0.19388	9	29	28	0.030288	0.074866	0	1		5
915	2011	3.05511	1	3.69379	0.693147	-1.24206	22.1855	0.061929	0.199524	9	29	28	0.030288	0.090585	0	1		1
915	2012	5.70227	3	3.79624	0	-0.555234	22.2728	0.007739	0.497891	9	29	28	0.0246361	0.091131	0	1		3
915	2013	15.5824	3	3.84694	0	-0.275127	22.3157	0.007339	0.676538	9	24	28	0.0170724	0.043887	0	1		3
915	2014	11.6392	3	3.82227	0.693147	-0.072634	22.2948	0.004362	0.322678	9	24	28	0.0127412	-0.020661	0	1		3
915	2015	17.195	2	3.83394	0.693147	-0.352549	22.3047	0.005689	0.315932	9	24	28	0.0127412	0.009931	0	1		2
915	2016	26.261	2	3.87915	1.38629	-0.576031	22.3429	0.011515	0.332495	9	17.75	28	0.0127421	0.030635	0	1		2
915	2017	16.9529	3	4.06507	1.09861	-0.729876	22.499	0.010026	0.352493	8	17.56	28	0.0127421	0.168914	0	1		3
915	2018	25.0745	2	4.31248	1.60944	-0.795164	22.704	0.01075	0.446892	9	17.56	28	0.0100983	0.227559	0	1		2
915	2019	19.0802	3	4.48969	1.79176	-0.308595	22.8491	0.012167	0.202061	9	15.96	28	0.0095437	0.156089	0	1		3
915	2020	16.7306	2	4.57286	2.07944	-0.384281	22.9166	0.003221	0.493336	8	17.11	28	0.0244324	0.069896	0	1		2
915	2021	2.89563	1	4.69325	2.3979	7.74756	23.0139	-0.031526	0.730571	9	17.3	28	0.0258544	0.102133	0	1		1
915	2022	2.56079	1	4.71545	2.3979	-25.6932	23.0318	-0.007182	0.197136	9	17.3	28	0.0275305	0.01802	0	1		1
915	2023	5.11008	1	4.80913	0	-0.851753	23.1069	-0.036412	0.477437	9	17.3	28	0.0295854	0.078021	0	1		1
919	2011	1.22037	1	2.44262	1.60944	2.79625	21.1826	0.031665	0.100163	5		31	0.0295851	0.63025	0	1		1
919	2012	1.95152	1	2.53671	0.693147	-39.8853	21.269	0.027008	0.293396	8		31	0.0465861	0.091213	0	1		1
919	2013	3.71993	1	2.75198	1.79176	-0.444032	21.4646	0.046148	0.134443	8		31	0.0466459	0.216038	0	1		1
919	2014	10.5881	1	3.07424	2.56495	-0.716928	21.752	0.051075	0.247452	4		31	0.0465483	0.33292	0	1		1
919	2015	11.271	1	3.1381	1.09861	2.59359	21.8082	0.01367	0.342812	6	42.5	31	0.0552078	0.0583	0	1		1
919	2016	10.5701	1	3.08093	2.19722	3.30841	21.7579	-0.043316	0.106718	6	42.5	31	0.0553784	-0.047908	0	1		1
919	2017	11.1089	1	3.17788	2.19722	-2.6246	21.8431	0.089888	0.152097	9	42.5	31	0.0555051	0.088935	0	1		1
919	2018	10.3697	1	3.30708	0	-11.8798	21.9558	0.19932	0.209968	9	32.07	31	0.0534684	0.116473	0	1		1
919	2019	10.0061	1	3.49592	1.79176	0.525888	22.1189	0.08241	0.171274	9	32.07	31	0.041517	0.17709	0	1		1
919	2020	6.9086	2	3.45991	1.60944	-1.7861	22.0879	0.049332	0.314661	8	32.07	31	0.0407758	-0.030461	0	1		2
919	2021	4.219	1	3.47227	0	-0.476913	22.0986	0.02926	0.291058	9	32.07	31	0.0407758	0.010681	0	1		1
919	2022	10.3543	1	3.72845	2.07944	-0.604572	22.317	0.077464	0.554589	8	32.07	31	0.0410277	0.238701	0	1		1
919	2023	9.86429	1	3.99413	0	0.559287	22.5399	-0.002497	1.81013	9	32.07	31	0.0410561	0.249706	0	1		1
920	2011	7.97483	2	4.18357	2.3979	9.77183	22.6967	0.036151	0.583394	11	32.07	31	0.0410632	0.169759	0	1		2
920	2012	8.6687	2	4.47759	0	13.537	22.9367	0.03897	0.594795	11	32.07	31	0.04117	0.271497	0	1		2
920	2013	14.1247	2	4.40563	0	-6.54593	22.8783	-0.007246	0.919136	8	32.07	31	0.0403086	-0.056693		1		2
920	2015	5.10749	1	4.1982	1.38629	-4.48153	22.7087	0.013625	0.53535	9	30.63	31	0.039688	-0.155976	0	1		1
920	2016	5.0489	1	4.22828	0	0.029964	22.7335	0.023541	0.191571	9	30.63	31	0.0358666	0.025027	0	1		1
920	2017	4.78712	1	4.22491	0	-1.03893	22.7307	-0.05939	0.419167	9	30.63	31	0.0358666	-0.002766	0	1		1
920	2018	6.93478	2	4.15244	2.89037	-0.983244	22.6711	0.015206	0.410403	9	30.63	31	0.0359417	-0.057887	0	1		2
920	2019	5.73686	2	4.17367	0	-3.26307	22.6886	0.079572	0.86712	9	30.63	31	0.0358497	0.017648	0	1		2
920	2020	5.62789	2	4.29304	0	-0.257605	22.7865	0.050386	0.546436	9	30.63	31	0.0358497	0.102931	0	1		2
920	2021	20.1581	2	1.72651	0	-6.84809	20.3867	0.137422	1.44612	7	30.63	28	0.0361402	2.871	0	1		2
920	2022	15.5225	2	2.07349	0	0.351318	20.7233	0.190669	0.740883	7		28	0.0361402	0.400236	0	1		2
920	2023	20.7976	3	2.50319	0	-0.494601	21.1277	0.129701	1.75705	9		28	0.0424504	0.498385	1	1		3
921	2013	14.129	4	2.85584	1.94591	-1.33848	21.4501	0.028793	1.9394	9		28	0.0424504	0.380434	1	1		4
921	2014	15.8332	4	3.02869	1.38629	-0.005203	21.6052	0.026865	0.28414	9	27.3	28	0.0429439	0.167785	1	1		4
921	2015	13.7938	3	3.02224	2.07944	-0.874517	21.5994	0.067166	0.416773	8	27.3	28	0.0429439	-0.005742	0	1		3
921	2016	14.9756	4	3.10347	0	-0.741962	21.6717	0.065575	0.331893	9	20.46	28	0.0455003	0.074965	0	1		4
921	2017	14.2246	3	3.21738	2.3979	-0.412313	21.7724	0.045348	0.387753	9	17.99	28	0.0363476	0.103045	0	1		3
921	2018	14.4729	5	3.18063	0	0.892905	21.74	0.031578	0.331391	8	17.99	28	0.0364045	-0.031885		1		5
921	2019	13.096	4	3.19181	0	-3.23231	21.7499	0.089907	0.304281	8	17.99	28	0.0455091	0.009914		1		4
921	2020	13.7772	4	3.39567	2.56495	2.655	21.9285	0.054983	0.433168	6	17.99	28	0.0454286	0.195593		1		4
921	2021	16.1763	4	3.62187	2.56495	-1.4601	22.124	0.028482	0.356487	9	17.99	28	0.0455619	0.215868	0	1		4
921	2022	19.142	4	3.73959	2.48491	-0.439766	22.2246	0.051514	0.286535	8	17.99	28	0.0455927	0.10585	0	1		4
921	2023	22.0895	5	3.70189	2.48491	45.6782	22.1925	0.037005	0.335213	9		28	0.0439306	-0.031627	0	1		5
922	2013	9.24528	2	3.62242	2.48491	-1.36698	22.1245	0.030062	0.029485	8		28	0.0441979	-0.065739	1	1		2
922	2014	9.25039	2	3.57837	2.56495	-1.24722	22.0866	0.030135	1.0531	9		28	0.0441979	-0.037135	1	1		2
922	2015	10.9722	2	3.56825	1.79176	1.68651	22.0779	0.022483	1.53203	9		28	0.0436126	-0.008676	1	1		2
922	2016	12.45	2	3.45643	0	0.244613	21.9813	0.004201	0.601006	9	16.26	28	0.0436126	-0.09208	0	1		2
922	2018	13.2602	2	3.5421	0.693147	-0.33747	22.0554	0.000827	0.93093	9	16.26	28	0.0436262	0.076887	0	1		2
922	2019	12.2005	2	3.6196	1.79176	-3.11589	22.122	0.002745	1.48667	9	20.57	28	0.0436267	0.068926		1		2
922	2020	11.6399	2	3.80988	4.54329	0.390214	22.2843	0.008348	1.12722	9	25.57	28	0.0436267	0.1762	0	1		2
[truncated: 80,714 more rows]

## Sheet: Sheet3
		ESG1	ESG2011				E分数		E分数		E分数	1.77635	E分数	1.7766	E分数	1.90075	E分数	1.9846	E分数	2.08612	E分数	2.11336	E分数	1.95736	E分数	2.07037	E分数	2.33587
[truncated: 2,495 more rows]

[truncated: 4 more sheets: Sheet4, Sheet6, Sheet7, Sheet5]
