# Supplementary material for: How corporate ESG performance enables New-qualitive Productive forces development based on Listed companies in the manufacturing industry: Evidence from China
Source: Research Square preprint supplement (doi:10.21203/rs.3.rs-6158355/v1), 2025-07-24
Supplement: Supplementary file 2 [file 0ffb546b72a214b4e85959d0.xlsx]

## Sheet: sheet1
Stkcd	Shrchgdt	Shrtyp	Nshrttl	Nshrsms
证券代码	股本变动日期	股本变动类型	总股数	高管持股数
没有单位	没有单位	没有单位	股	股
000002	2005-12-02	07000	3720527606	2415578	0.000649257
000002	2005-12-31	40000	3722687670	2415578	0.00064888
000002	2006-03-31	40000	3936964741	2415578	0.000613564
000002	2006-06-30	40000	3969898751	2415578	0.000608473
000002	2006-09-04	90000	3969898751	2415578	0.000608473
000002	2006-12-06	00009	3969898751	2415578	0.000608473
000002	2006-12-22	00060	4369898751	2415578	0.000552777
000002	2007-03-05	00005	4369898751	2415578	0.000552777
000002	2007-05-16	03000	6554848126	3623367	0.000552777
000002	2007-09-04	00008	6554848126	1915476	0.000292223
000002	2007-09-05	00002	6872006387	1997030	0.000290604
000002	2007-12-05	00005	6872006387	1733278	0.000252223
000002	2007-12-06	00009	6872006387	1733278	0.000252223
000002	2007-12-27	05000	6872006387	1733278	0.000252223
000002	2008-06-05	00005	6872006387	1497772	0.000217953
000002	2008-06-16	03000	10995210218	2396435	0.000217953
000002	2008-12-31	00008	10995210218	26037098	0.00236804
000002	2009-06-30	00008	10995210218	24159840	0.00219731
000002	2009-12-29	05000	10995210218	24159840	0.00219731
000002	2010-06-30	00005	10995210218	24174840	0.00219867
000002	2010-12-31	00005	10995210218	19364778	0.0017612
000002	2011-06-30	00005	10995210218	21676424	0.00197144
000002	2011-12-31	00005	10995210218	18426384	0.00167586
000002	2012-06-30	00005	10995210218	18218720	0.00165697
000002	2012-12-31	00005	10995553118	18402673	0.00167365
000002	2013-06-30	00005	11013724969	23828261	0.00216351
000002	2013-12-31	00070	11014968919	23828261	0.00216326
000002	2014-06-03	00070	11015026419	23828261	0.00216325
000002	2014-06-25	00008	11015026419	23828261	0.00216325
000002	2014-06-30	00005	11015027119	28158561	0.00255638
000002	2014-12-31	00070	11037507242	15874479	0.00143823
000002	2015-06-30	00070	11048058100	15386999	0.00139273
000002	2015-07-15	00070	11048143800	15386999	0.00139272
000002	2015-09-18	06000	11042767064	15386999	0.0013934
000002	2015-12-31	00070	11051612300	16073774	0.00145443
000002	2016-01-14	06000	11039132001	15848774	0.00143569
000002	2016-03-31	00070	11039152001	15848774	0.00143569
000002	2016-06-30	00005	11039152001	16088774	0.00145743
000002	2016-12-31	00005	11039152001	15128774	0.00137047
000002	2017-06-30	00005	11039152001	15031428	0.00136165
000002	2017-12-31	00005	11039152001	9026490	0.00081768
000002	2019-04-04	00050	11302143001	9026490	0.000798653
000002	2020-06-11	00050	11617732201	9026490	0.000776958
000002	2020-06-30	00005	11617732201	9881598	0.000850562
000002	2020-12-31	00005	11617732201	6643268	0.000571821
000002	2021-08-25	00008	11625383375	6643268	0.000571445
000002	2022-06-30	00005	11625383375	6835793	0.000588006
000002	2022-08-26	00008	11630709471	6835793	0.000587737
000002	2022-12-31	00005	11630709471	7529318	0.000647365
000002	2023-03-09	00100	11930709471	7529318	0.000631087
000002	2023-12-31	00005	11930709471	7260668	0.00060857
000004	1995-08-30	01000	83976684	236	2.8103e-06
000004	2006-08-18	07000	83976684	54500	0.00064899
000004	2007-05-22	00005	83976684	40875	0.000486742
000004	2007-05-28	01000	83976684	42510	0.000506212
000004	2007-08-20	00009	83976684	42510	0.000506212
000004	2011-12-31	00005	83976684	1725	2.05414e-05
000004	2015-12-31	00005	83976684	915300	0.0108995
000004	2016-06-30	00008	83976684	915800	0.0109054
000004	2016-12-31	00005	83976684	913500	0.010878
000004	2018-02-05	00008	83976684	913500	0.010878
000004	2018-02-07	00008	83976684	913500	0.010878
000004	2018-12-31	00005	83976684	993075	0.0118256
000004	2019-06-30	00005	83976684	1322100	0.0157437
000004	2019-12-31	00005	83976684	6000	7.14484e-05
000004	2020-01-13	00060	165052625	6000	3.6352e-05
000004	2020-06-30	00005	165052625	8000	4.84694e-05
000004	2021-01-25	00005	165052625	6000	3.6352e-05
000004	2021-01-26	05000	165052625	6000	3.6352e-05
000004	2021-07-28	06000	156003026	6000	3.84608e-05
000004	2021-08-06	05000	156003026	6000	3.84608e-05
000004	2022-07-05	00005	156003026	7075	4.53517e-05
000004	2022-07-06	06000	132848008	7075	5.32563e-05
000004	2023-01-18	00005	132848008	975	7.33921e-06
000004	2023-01-20	05000	132848008	975	7.33921e-06
000004	2023-07-25	06000	132380282	975	7.36515e-06
000004	2023-08-15	05000	132380282	975	7.36515e-06
000006	1995-07-11	01000	135620074	40704	0.000300133
000006	1997-07-09	01000	230537849	69190	0.000300124
000006	2006-01-12	07000	253591631	22920	9.03815e-05
000006	2006-12-14	00070	253591631	6110916	0.0240975
000006	2007-01-12	00009	253591631	6105186	0.0240749
000006	2008-01-29	00005	253591631	6087996	0.0240071
000006	2008-01-30	00009	253591631	6087996	0.0240071
000006	2008-02-05	00070	253591631	10596543	0.0417859
000006	2008-04-29	03000	507183262	21193086	0.0417859
000006	2008-12-31	00005	507183262	21871011	0.0431225
000006	2009-01-17	00005	507183262	21193086	0.0417859
000006	2009-01-20	00009	507183262	21193086	0.0417859
000006	2009-02-11	00005	507183262	22257486	0.0438845
000006	2009-02-12	00008	507183262	10081494	0.0198774
000006	2009-12-31	00008	507183262	9995264	0.0197074
000006	2010-05-07	00008	507183262	9525510	0.0187812
000006	2010-05-13	03000	760774893	14288265	0.0187812
000006	2011-03-05	00005	760774893	13460249	0.0176928
000006	2011-03-09	05000	760774893	13310249	0.0174956
000006	2011-05-21	00005	760774893	13108505	0.0172305
000006	2011-05-24	00008	760774893	12807499	0.0168348
000006	2011-06-14	03000	989007360	16649749	0.0168348
000006	2011-12-31	00005	989007360	16651250	0.0168363
000006	2012-05-23	00005	989007360	13359017	0.0135075
000006	2012-05-24	05000	989007360	11138721	0.0112625
000006	2012-07-11	03000	1285709568	14480337	0.0112625
000006	2012-12-31	00005	1285709568	14478387	0.011261
000006	2013-05-16	00005	1285709568	15285062	0.0118884
000006	2013-05-17	00008	1285709568	13373438	0.0104016
000006	2013-06-20	03000	1349995046	14042110	0.0104016
000006	2013-12-31	00005	1349995046	11753463	0.0087063
000006	2014-06-30	00005	1349995046	11097903	0.0082207
000006	2015-06-30	00005	1349995046	8507646	0.00630198
000006	2015-12-31	00005	1349995046	9728976	0.00720668
000006	2016-06-30	00005	1349995046	4843658	0.00358791
000006	2016-12-31	00005	1349995046	5111150	0.00378605
000006	2017-06-30	00005	1349995046	4825886	0.00357474
000006	2017-12-31	00005	1349995046	1727639	0.00127974
000006	2018-06-30	00005	1349995046	1687074	0.00124969
000006	2018-12-31	00005	1349995046	2208868	0.0016362
000006	2019-06-30	00005	1349995046	1687074	0.00124969
000006	2023-06-30	00005	1349995046	7650	5.66669e-06
000007	2011-05-12	00060	230965363	25000000	0.108241
000007	2012-12-31	00005	230965363	25133723	0.10882
000007	2013-12-31	00005	230965363	25152222	0.1089
000007	2014-06-06	05000	230965363	25152222	0.1089
000007	2014-12-31	00005	230965363	25078225	0.10858
000007	2015-12-31	00005	230965363	25171900	0.108986
000007	2016-06-30	00005	230965363	25000000	0.108241
000007	2017-05-22	01000	346448044	37500000	0.108241
000008	1992-05-07	10000	23760000	191884	0.00807593
000008	2005-12-13	07000	73653208	90	1.22194e-06
000008	2007-05-11	00009	73653208	90	1.22194e-06
000008	2007-12-28	00009	73653208	90	1.22194e-06
000008	2010-07-23	00009	73653208	90	1.22194e-06
000008	2012-12-28	00060	151800820	90	5.92882e-07
000008	2013-05-28	01000	303601640	180	5.92882e-07
000008	2015-02-05	00060	553892627	180	3.24973e-07
000008	2015-03-13	01000	803144309	261	3.24973e-07
000008	2015-09-18	00005	803144309	18261	2.27369e-05
000008	2015-09-24	01000	2409432927	54783	2.27369e-05
000008	2016-01-07	00005	2409432927	644283	0.0002674
000008	2016-01-08	05000	2409432927	644283	0.0002674
000008	2016-01-29	00005	2409432927	59283	2.46045e-05
000008	2016-02-01	00060	2668838809	59283	2.2213e-05
000008	2016-02-05	00008	2668838809	232071510	0.086956
000008	2016-02-15	05000	2668838809	174294975	0.0653074
000008	2016-03-10	00060	2757709279	174294975	0.0632028
000008	2016-06-30	00005	2757709279	176945311	0.0641639
000008	2016-12-23	00005	2757709279	176656393	0.0640591
000008	2016-12-28	00070	2809078279	183856393	0.0654508
000008	2017-01-25	00005	2809078279	181490475	0.0646086
000008	2017-02-06	05000	2809078279	148592325	0.0528972
000008	2017-03-17	00005	2809078279	160724091	0.057216
000008	2017-03-21	05000	2809078279	154470714	0.0549898
000008	2017-06-30	00005	2809078279	165581219	0.058945
000008	2017-07-06	00005	2809078279	160719931	0.0572145
000008	2017-07-07	06000	2808226279	160719931	0.0572318
000008	2017-09-22	00005	2808226279	175844453	0.0626176
000008	2017-09-25	00070	2819005279	175844453	0.0623782
000008	2017-10-24	06000	2818329809	175844453	0.0623931
000008	2017-12-26	00005	2818329809	173278165	0.0614826
000008	2017-12-28	00008	2818329809	171853165	0.060977
000008	2017-12-31	00005	2818329809	172828165	0.0613229
000008	2018-02-27	00005	2818329809	184391498	0.0654258
000008	2018-02-28	05000	2818329809	154325870	0.0547579
000008	2018-03-16	00005	2818329809	166846367	0.0592004
000008	2018-03-21	05000	2818329809	161931334	0.0574565
000008	2018-06-30	00005	2818329809	178592990	0.0633684
000008	2018-10-15	00008	2818329809	178592990	0.0633684
000008	2018-12-31	00005	2818329809	165198331	0.0586157
000008	2019-01-07	00005	2818329809	163851405	0.0581378
000008	2019-01-08	06000	2780795346	162231405	0.0583399
000008	2019-03-21	05000	2780795346	162231405	0.0583399
000008	2019-06-30	00005	2780795346	155077940	0.0557675
000008	2019-12-31	00005	2780795346	121021399	0.0435204
000008	2020-01-10	00005	2780795346	83551399	0.0300459
000008	2020-06-30	00005	2780795346	83666545	0.0300873
000008	2020-12-31	00005	2780795346	83632130	0.0300749
000008	2021-06-30	00005	2780795346	55066056	0.0198023
000008	2021-12-31	00005	2780795346	54914630	0.0197478
000008	2022-06-30	00005	2780795346	54357107	0.0195473
000008	2023-01-13	06000	2716377683	54357107	0.0200109
000008	2023-12-31	00005	2716377683	10725213	0.00394835
000008	2024-06-30	00005	2716377683	650107	0.000239329
000009	1993-04-12	03000	377714200	375600	0.000994403
000009	1994-06-16	01000	642464638	527306	0.000820755
000009	1994-12-31	00008	643015806	527306	0.000820051
000009	1995-07-21	01000	803769757	379400	0.000472026
000009	1996-04-24	00100	913152400	469400	0.000514043
000009	1996-08-07	01000	958810042	492900	0.000514075
000009	2008-05-16	07000	1038810028	223305	0.000214962
000009	2008-12-31	00008	1038810028	223305	0.000214962
000009	2009-05-22	00008	1038810028	203976	0.000196355
000009	2009-05-25	00009	1038810028	203976	0.000196355
000009	2009-07-30	00008	1038810028	203976	0.000196355
000009	2009-07-31	00009	1038810028	203976	0.000196355
000009	2009-08-06	03000	1090750529	214175	0.000196356
000009	2009-12-31	00008	1090750529	214175	0.000196356
000009	2010-02-03	00008	1090750529	210829	0.000193288
000009	2010-02-05	00009	1090750529	210829	0.000193288
000009	2010-05-13	00008	1090750529	210829	0.000193288
000009	2010-05-28	00009	1090750529	210829	0.000193288
000009	2010-06-30	00008	1090750529	210829	0.000193288
000009	2010-09-03	00009	1090750529	210829	0.000193288
000009	2010-12-14	00008	1090750529	212066	0.000194422
000009	2010-12-17	00009	1090750529	212066	0.000194422
000009	2010-12-31	00008	1090750529	212066	0.000194422
000009	2011-04-02	00005	1090750529	210710	0.000193179
000009	2011-04-08	00009	1090750529	210710	0.000193179
000009	2011-07-13	00008	1090750529	144875	0.000132821
000009	2011-07-14	00009	1090750529	144875	0.000132821
000009	2012-11-16	00008	1090750529	144875	0.000132821
000009	2012-12-31	00005	1090750529	127306	0.000116714
000009	2013-07-26	03000	1254363108	146402	0.000116714
000009	2014-07-09	03000	1505235729	175682	0.000116714
000009	2015-03-03	00060	1592107386	4436082	0.0027863
000009	2016-03-03	00008	1592107386	4436082	0.0027863
000009	2016-03-04	05000	1592107386	4157987	0.00261162
000009	2016-04-12	00008	1592107386	4157987	0.00261162
000009	2016-07-08	05000	1592107386	4054143	0.0025464
000009	2016-07-21	03000	2149344971	5473093	0.0025464
000009	2017-06-30	00005	2149344971	5449555	0.00253545
000009	2017-12-31	00005	2149344971	5674555	0.00264013
000009	2018-06-30	00005	2149344971	5749557	0.00267503
000009	2019-07-12	00005	2149344971	5674557	0.00264013
000009	2019-07-22	01000	2579213965	6809468	0.00264013
000009	2020-08-21	05000	2579213965	2382580	0.000923762
000009	2020-12-31	00005	2579213965	2850245	0.00110508
000010	1998-12-31	00008	73508724	4659	6.33802e-05
000010	2018-06-30	00005	819854713	150	1.82959e-07
000010	2018-12-31	00005	819854713	1150	1.40269e-06
000010	2022-06-30	00005	1058692292	225	2.12526e-07
000010	2023-11-23	00070	1149652292	34500000	0.0300091
000010	2023-12-31	00008	1149652292	34500000	0.0300091
000010	2024-08-21	00008	1149652292	34500000	0.0300091
000010	2024-08-23	00008	1149652292	34500000	0.0300091
000011	2008-12-31	00005	541799175	5001	9.23036e-06
000011	2011-04-13	60005	595979092	4042	6.78212e-06
000011	2011-04-14	00009	595979092	4042	6.78212e-06
000011	2011-06-30	00005	595979092	5544	9.30234e-06
000011	2011-07-13	00009	595979092	5544	9.30234e-06
000011	2011-11-14	00008	595979092	5544	9.30234e-06
000011	2011-12-19	00009	595979092	5544	9.30234e-06
000012	2006-05-24	07000	1015463124	187998	0.000185135
000012	2006-12-31	00005	1015463124	139559	0.000137434
000012	2007-05-25	00009	1015463124	137559	0.000135464
000012	2007-06-30	60000	1015463124	103169	0.000101598
000012	2007-10-11	00060	1187963124	103169	8.68453e-05
000012	2008-02-05	00009	1187963124	103169	8.68453e-05
000012	2009-08-27	00008	1223738124	8925000	0.00729323
000012	2009-08-28	00009	1223738124	8925000	0.00729323
000012	2010-01-20	06000	1222695624	7882500	0.00644682
000012	2010-05-06	00008	1222695624	9375000	0.00766748
000012	2010-05-14	03000	2078582560	15937500	0.00766748
000012	2010-06-25	00008	2078582560	10625000	0.00511166
000012	2010-06-30	00008	2078582560	1503513	0.000723336
000012	2010-07-30	06000	2076721060	1503513	0.000723984
000012	2010-10-20	05000	2076721060	1503513	0.000723984
000012	2011-06-30	00005	2076143060	4788884	0.00230663
000012	2011-10-14	06000	2075837060	4788884	0.00230697
000012	2012-05-21	06000	2075335560	4788884	0.00230752
000012	2012-06-27	00005	2075335560	5564666	0.00268133
000012	2012-06-28	05000	2075335560	5564666	0.00268133
000012	2012-06-30	00005	2075335560	10956853	0.00527956
000012	2012-12-31	00005	2075335560	9109978	0.00438964
000012	2013-12-31	00005	2075335560	10284197	0.00495544
000012	2014-06-30	00005	2075335560	9982997	0.0048103
000012	2014-12-31	00005	2075335560	10060247	0.00484753
000012	2015-06-30	00005	2075335560	10309741	0.00496775
000012	2015-12-31	00005	2075335560	8679666	0.0041823
000012	2016-06-30	00005	2075335560	8765166	0.00422349
000012	2016-12-31	00005	2075335560	12736888	0.00613727
000012	2017-06-30	00005	2075335560	246875	0.000118957
000012	2017-07-19	01000	2386635893	283906	0.000118957
000012	2017-12-22	00005	2386635893	260906	0.00010932
000012	2017-12-25	00070	2484147547	10456614	0.00420934
000012	2018-06-27	01000	2856769678	12025106	0.00420934
000012	2018-09-10	06000	2853450621	12025106	0.00421423
000012	2018-09-28	00070	2863277201	15325106	0.0053523
000012	2018-12-19	00005	2863277201	15322626	0.00535143
000012	2018-12-21	00008	2863277201	13966120	0.00487767
000012	2018-12-31	00005	2863277201	11934664	0.00416818
000012	2019-06-17	00005	2863277201	12639260	0.00441426
000012	2019-06-18	06000	2825632877	6995494	0.00247573
000012	2019-06-20	00008	2825632877	6864394	0.00242933
000012	2019-06-26	01000	3108196163	7550833	0.00242933
000012	2019-06-30	00005	3108196163	7697769	0.0024766
000012	2019-09-20	00005	3108196163	7298830	0.00234825
000012	2019-09-25	00008	3108196163	7023830	0.00225978
000012	2019-12-31	00005	3108196163	6834914	0.002199
000012	2020-06-15	00005	3108196163	7517514	0.00241861
000012	2020-06-16	06000	3070692107	3085540	0.00100484
000012	2020-12-31	00005	3070692107	2142804	0.000697824
000012	2021-06-30	00005	3070692107	3250797	0.00105865
000012	2021-12-31	00005	3070692107	3555622	0.00115792
000012	2022-06-30	00005	3070692107	3367122	0.00109654
000012	2022-12-31	00005	3070692107	3657075	0.00119096
000012	2023-06-30	00005	3070692107	3175475	0.00103412
000012	2023-12-31	00005	3070692107	862228	0.000280793
000014	2009-06-30	00008	201705187	1265	6.27153e-06
000014	2010-06-30	00005	201705187	949	4.70489e-06
000016	1996-07-17	00100	330111469	86266	0.000261324
000016	1996-10-30	00100	365572641	86266	0.000235975
000016	1998-07-16	00100	389383603	97653	0.000250789
000016	1998-12-31	00008	389383603	56610	0.000145384
000016	1999-08-23	01000	467260322	67932	0.000145384
000016	2006-03-30	07000	601986352	3942	6.54832e-06
000016	2007-11-27	60000	601986352	3942	6.54832e-06
000016	2008-05-28	00008	601986352	2475	4.11139e-06
000016	2008-06-03	03000	1203972704	4950	4.11139e-06
000016	2008-12-31	00005	1203972704	6234	5.17786e-06
000016	2009-12-31	00005	1203972704	4950	4.11139e-06
000016	2011-12-31	00005	1203972704	6600	5.48185e-06
000016	2015-06-30	00005	1203972704	63405	5.26632e-05
000016	2015-09-25	01000	2407945408	126810	5.26632e-05
000016	2016-02-26	00005	2407945408	169080	7.02175e-05
000016	2016-03-02	00008	2407945408	169080	7.02175e-05
000016	2017-06-30	00005	2407945408	19500	8.09819e-06
000016	2022-06-30	00005	2407945408	26000	1.07976e-05
000017	2010-03-16	00008	479433003	82875	0.00017286
000017	2010-03-18	07000	551347947	125547	0.000227709
000017	2011-04-27	00008	551347947	8947	1.62275e-05
000017	2011-04-28	00009	551347947	8947	1.62275e-05
000017	2011-06-30	00005	551347947	11572	2.09886e-05
000017	2012-05-18	00008	551347947	11572	2.09886e-05
000017	2012-06-29	00008	551347947	11572	2.09886e-05
000017	2013-02-08	00008	551347947	11572	2.09886e-05
000017	2013-12-11	00008	551347947	11572	2.09886e-05
000017	2013-12-31	00005	551347947	11362	2.06077e-05
000017	2014-12-31	00005	551347947	8232	1.49307e-05
000017	2015-06-30	00005	551347947	6207	1.12579e-05
000017	2016-06-30	00005	551347947	4707	8.53726e-06
000017	2018-06-30	00005	551347947	3957	7.17696e-06
000017	2022-10-26	00060	689184933	3957	5.74156e-06
000017	2022-12-31	00005	689184933	5276	7.65542e-06
000018	2015-11-26	00060	446906582	14735772	0.0329728
000018	2015-12-31	00005	446906582	14852172	0.0332333
000018	2016-01-08	00008	446906582	14852172	0.0332333
000018	2016-06-01	00008	446906582	14940522	0.033431
000018	2016-06-07	01000	1698245011	56773984	0.033431
000018	2016-10-14	05000	1698245011	56773984	0.033431
000018	2017-06-30	00005	1698245011	56413609	0.0332188
000018	2017-12-31	00005	1698245011	57043609	0.0335897
000018	2018-06-30	00005	1698245011	57262084	0.0337184
000018	2018-11-29	00005	1698245011	1585770	0.00093377
000018	2018-12-03	05000	1698245011	1585770	0.00093377
000018	2019-06-30	00005	1698245011	1280801	0.000754191
000019	1994-08-01	20000	118044228	48110	0.000407559
000019	1995-01-04	01100	138923072	48110	0.000346307
000019	1996-12-31	00008	138923072	18038	0.000129842
000019	1997-07-15	01000	166707684	21644	0.000129832
000019	1998-12-31	00008	166707684	5964	3.57752e-05
000019	2006-07-27	07000	181923088	10598	5.82554e-05
000019	2015-12-31	00005	301080184	150825	0.000500946
000019	2016-06-22	01000	451620276	226237	0.000500945
000019	2016-12-31	00005	451620276	228937	0.000506924
000019	2017-06-28	03000	496782303	251831	0.000506924
000019	2018-06-30	00005	496782303	261771	0.000526933
000019	2018-10-30	00060	1152535254	261771	0.000227126
000019	2018-12-31	00005	1152535254	251829	0.0002185
000019	2019-06-30	00005	1152535254	296009	0.000256833
000019	2020-06-30	00005	1152535254	31575	2.73961e-05
000020	2007-05-18	07000	283161227	34998	0.000123597
000020	2007-12-31	00005	283161227	26248	9.26963e-05
000021	1994-08-26	20000	151675000	321160	0.00211742
000021	1994-08-31	01000	189593750	401450	0.00211742
000021	1996-04-18	00100	204251807	521884	0.0025551
000021	1996-06-11	01000	265527348	678448	0.0025551
000021	1997-06-20	01000	531054696	1018896	0.00191863
000021	2006-05-22	07000	732932101	1024955	0.00139843
000021	2006-06-15	03000	879518521	1229946	0.00139843
000021	2007-05-22	00009	879518521	1229946	0.00139843
000021	2007-12-31	00005	879518521	922460	0.00104882
000021	2008-12-31	00005	879518521	922084	0.0010484
000021	2009-05-25	00009	879518521	922084	0.0010484
000021	2010-06-10	03000	1319277781	1383126	0.0010484
000021	2012-12-31	00005	1319277781	1445001	0.0010953
000021	2013-10-09	00060	1471259363	1460001	0.000992348
000021	2013-12-31	00008	1471259363	66578	4.52524e-05
000021	2014-10-10	05000	1471259363	66578	4.52524e-05
000021	2016-12-31	00005	1471259363	61875	4.20558e-05
000021	2017-06-30	00005	1471259363	505125	0.000343328
000021	2017-12-31	00005	1471259363	373875	0.000254119
000021	2018-06-30	00005	1471259363	448875	0.000305096
000021	2018-12-31	00005	1471259363	418875	0.000284705
000021	2019-06-30	00005	1471259363	448875	0.000305096
000021	2020-06-30	00005	1471259363	751580	0.000510841
000021	2021-12-31	00005	1560587588	14999	9.61112e-06
000021	2022-06-30	00005	1560587588	29999	1.92229e-05
000021	2022-12-31	00005	1560587588	11249	7.20818e-06
000021	2023-12-31	00005	1560587588	29999	1.92229e-05
000022	2004-06-22	03000	495972100	130520	0.00026316
000022	2006-05-30	07000	644763730	129386	0.000200672
000022	2008-12-31	00005	644763730	292842	0.000454185
000022	2009-06-19	00009	644763730	292842	0.000454185
000022	2010-06-30	00005	644763730	594150	0.0009215
000022	2010-12-31	00005	644763730	673252	0.00104418
000022	2011-06-30	00008	644763730	790930	0.0012267
000022	2011-12-31	00008	644763730	790929	0.0012267
000022	2012-06-29	00005	644763730	754504	0.0011702
000022	2012-06-30	00005	644763730	703652	0.00109133
000022	2012-12-31	00005	644763730	735466	0.00114068
000022	2013-06-30	00005	644763730	685049	0.00106248
000022	2013-12-31	00005	644763730	387509	0.000601009
000022	2014-06-30	00005	644763730	450548	0.00069878
000022	2014-12-31	00005	644763730	367401	0.000569823
000022	2015-12-31	00005	644763730	431094	0.000668608
000022	2016-06-30	00005	644763730	305100	0.000473197
000022	2017-06-30	00005	644763730	358363	0.000555805
000022	2017-12-31	00005	644763730	160106	0.000248317
000022	2018-06-30	00008	644763730	160106	0.000248317
000024	2006-02-09	07000	618822672	57679	9.32076e-05
000024	2006-11-01	00009	618822672	163942	0.000264926
000024	2007-03-30	40000	630695519	179942	0.000285307
000024	2007-05-17	40000	707500000	185793	0.000262605
000024	2007-05-24	40000	734130363	185793	0.000253079
000024	2007-09-24	00060	844867002	185793	0.000219908
000024	2008-04-16	00008	844867002	159665	0.000188982
000024	2008-04-22	03000	1267300503	239498	0.000188983
000024	2008-12-05	00008	1267300503	382128	0.000301529
000024	2008-12-08	00062	1717300503	382128	0.000222517
000024	2008-12-31	00005	1717300503	473789	0.000275892
000024	2009-06-30	00005	1717300503	431939	0.000251522
000024	2010-11-18	05000	1717300503	431939	0.000251522
000024	2010-12-31	00005	1717300503	465451	0.000271036
000024	2011-06-30	00005	1717300503	555800	0.000323647
000024	2011-12-31	00005	1717300503	477150	0.000277849
000024	2012-06-30	00005	1717300503	500625	0.000291519
000024	2012-12-31	00005	1717300503	512851	0.000298638
000024	2013-12-31	00005	1717300503	376098	0.000219005
000024	2014-05-30	00008	1717300503	462515	0.000269327
000024	2014-06-06	01000	2575950754	693772	0.000269327
000024	2014-06-30	00008	2575950754	752423	0.000292095
000024	2014-12-31	00008	2575950754	473862	0.000183956
000024	2015-06-30	00005	2575950754	483835	0.000187828
000025	2006-01-04	07000	220281600	13300	6.03773e-05
000026	2007-11-09	07000	249317999	47365	0.000189978
000026	2007-12-31	00005	249317999	35524	0.000142485
000026	2010-12-14	00060	280548479	35524	0.000126623
000026	2011-04-27	03000	392767871	49734	0.000126624
000026	2012-01-09	05000	392767871	49734	0.000126624
000026	2013-12-31	05000	392767871	49734	0.000126624
000026	2016-01-14	00060	438744881	49733	0.000113353
000026	2017-01-16	05000	438744881	49733	0.000113353
000026	2017-12-31	00005	438744881	380513	0.000867276
000026	2019-01-30	00070	442968881	980513	0.0022135
000026	2020-01-10	00005	442968881	1004591	0.00226786
000026	2020-04-29	06000	428238881	1004591	0.00234587
000026	2020-05-13	00005	428238881	980513	0.00228964
000026	2020-06-05	06000	428171881	980513	0.00229
000026	2020-07-29	06000	428144881	980513	0.00229014
000026	2020-09-14	06000	428124881	980513	0.00229025
000026	2020-11-09	06000	428091881	980513	0.00229043
000026	2021-01-29	00070	435751881	2210513	0.00507287
000026	2021-02-01	00008	435751881	2033013	0.00466553
000026	2021-02-05	00005	435751881	3331724	0.00764592
000026	2021-04-13	00005	435751881	2090513	0.00479748
000026	2021-04-23	06000	435550522	2090513	0.0047997
000026	2021-07-02	00005	435550522	2135513	0.00490302
000026	2021-07-06	06000	435390502	2135513	0.00490482
000026	2021-08-03	06000	426396416	2135513	0.00500828
000026	2021-08-24	06000	426263066	2135513	0.00500985
000026	2021-11-02	00005	426263066	2084800	0.00489088
000026	2021-11-03	06000	426051015	2018100	0.00473676
000026	2021-12-31	00005	426051015	1989775	0.00467027
000026	2022-01-28	00005	426051015	1951595	0.00458066
000026	2022-02-07	00008	426051015	1836595	0.00431074
000026	2022-07-08	00005	426051015	1634750	0.00383698
000026	2022-07-11	06000	425615177	1458030	0.0034257
000026	2022-12-14	00005	425615177	1431960	0.00336445
000026	2022-12-15	06000	417627960	1431960	0.00342879
000026	2023-01-31	00008	417627960	1149460	0.00275235
000026	2023-03-17	00005	417627960	1402540	0.00335835
000026	2023-07-06	06000	415280090	1152790	0.00277593
000026	2023-07-31	06000	415266730	1152790	0.00277602
000026	2023-11-03	06000	415219970	1152790	0.00277634
000026	2024-05-09	00005	415219970	998850	0.00240559
000026	2024-05-10	06000	405864207	998850	0.00246104
000026	2024-07-01	06000	405854187	998850	0.00246111
000027	1994-08-21	21000	352000000	252000	0.000715909
000027	1995-08-21	01000	387200000	171100	0.00044189
000027	1996-08-13	01000	406560000	205691	0.00050593
000027	1997-11-04	01000	906616206	454932	0.000501791
000027	2006-04-26	07000	1202495332	182752	0.000151977
000027	2007-04-27	00009	1202495332	182752	0.000151977
000027	2007-09-19	00009	1202495332	5728	4.76343e-06
000027	2007-12-06	00060	2202495332	5728	2.60069e-06
000028	1994-08-31	01000	115500000	306500	0.00265368
000028	1995-09-06	01000	127050000	192500	0.00151515
000028	1996-07-16	01000	133402500	192500	0.001443
000028	1996-11-12	01000	160083000	202500	0.00126497
000028	2007-12-31	00005	288149400	11175	3.8782e-05
000028	2008-05-15	00005	288149400	8381	2.90856e-05
000028	2008-05-16	00009	288149400	8381	2.90856e-05
000028	2009-05-15	00005	288149400	6286	2.18151e-05
000028	2009-05-18	00009	288149400	6286	2.18151e-05
000028	2010-06-30	00005	288149400	4714	1.63596e-05
000028	2012-06-30	00005	288149400	3535	1.22679e-05
000028	2013-06-30	00005	288149400	2651	9.20009e-06
000028	2014-03-19	00005	288149400	1988	6.8992e-06
000028	2014-03-20	00060	362631943	1988	5.48214e-06
000028	2017-01-04	00060	428126983	1988	4.64348e-06
000028	2017-03-21	05000	428126983	1988	4.64348e-06
000028	2019-06-30	00005	428126983	3113	7.27121e-06
000028	2020-01-06	05000	428126983	3113	7.27121e-06
000028	2023-06-01	01000	556565077	4046	7.26959e-06
000029	2006-02-17	07000	1011660000	7400	7.31471e-06
000029	2007-02-26	00009	1011660000	7400	7.31471e-06
000029	2007-12-31	00005	1011660000	5550	5.48603e-06
000029	2008-10-09	00008	1011660000	5550	5.48603e-06
000029	2008-10-13	00009	1011660000	5550	5.48603e-06
000029	2009-03-26	00009	1011660000	5550	5.48603e-06
000030	1994-09-02	20000	262200000	114000	0.000434783
000030	1995-12-18	01000	288420000	137720	0.000477498
000030	2008-12-29	07000	288420000	7050	2.44435e-05
000030	2008-12-31	00005	288420000	6750	2.34034e-05
000030	2009-06-30	00008	288420000	5362	1.85909e-05
000030	2010-03-26	00005	288420000	4096	1.42015e-05
000030	2010-03-30	00009	288420000	4096	1.42015e-05
000030	2010-05-14	00009	288420000	4096	1.42015e-05
000030	2010-11-15	00009	288420000	4096	1.42015e-05
000030	2010-12-31	00005	288420000	3147	1.09112e-05
000030	2011-09-26	00009	288420000	3147	1.09112e-05
000030	2011-12-31	00008	288420000	2698	9.35441e-06
000030	2012-04-20	00009	288420000	2698	9.35441e-06
000030	2012-08-07	05000	288420000	2698	9.35441e-06
000030	2013-01-07	00008	288420000	2698	9.35441e-06
000030	2013-03-20	00060	1298695140	2698	2.07747e-06
000030	2014-03-26	00005	1298695140	300	2.31001e-07
000030	2014-03-27	05000	1298695140	300	2.31001e-07
000030	2014-06-30	00005	1298695140	12989551	0.010002
000030	2014-09-23	00008	1298695140	12989551	0.010002
000030	2015-06-30	00005	1298695140	12719551	0.0097941
000030	2015-08-17	06000	1293251508	12719551	0.00983533
000030	2016-03-29	00005	1293251508	11861504	0.00917185
000030	2016-03-30	05000	1293251508	11861504	0.00917185
000030	2016-12-31	00005	1293251508	13532051	0.0104636
000030	2017-06-30	00005	1293251508	6849563	0.00529639
000030	2018-07-19	00005	1293251508	8693627	0.0067223
000030	2018-07-26	03000	1810552111	12171078	0.0067223
000030	2018-12-31	00005	1810552111	6136858	0.0033895
000030	2019-06-30	00005	1810552111	2852326	0.00157539
000030	2021-06-30	00005	1810552111	71646580	0.0395717
000030	2021-12-31	00005	1810552111	1614709	0.000891832
000030	2023-02-23	06000	1741643085	1614709	0.000927118
000031	1994-08-26	20000	220000000	320000	0.00145455
000031	1995-08-02	01000	264000000	320000	0.00121212
000031	1996-07-01	01000	330000000	506045	0.00153347
000031	1997-03-06	00100	373041903	534250	0.00143214
000031	1997-07-22	01000	466302377	667812	0.00143214
000031	2000-11-03	30000	466302377	667812	0.00143214
000031	2006-02-14	07000	466302377	175770	0.000376944
000031	2006-05-18	03000	699453565	263655	0.000376944
000031	2007-04-16	00009	699453565	263655	0.000376944
000031	2007-06-30	00005	699453565	197742	0.000282709
000031	2007-08-21	00100	906865798	257063	0.000283463
000031	2008-04-03	00005	906865798	85687	9.4487e-05
000031	2008-04-08	00009	906865798	85687	9.4487e-05
000031	2008-07-17	00005	906865798	114250	0.000125983
000031	2008-07-23	03000	1813731596	228500	0.000125983
000031	2009-08-10	00009	1813731596	20475	1.12889e-05
000031	2010-06-30	00005	1813731596	15356	8.46652e-06
000031	2011-12-31	00005	1813731596	11517	6.34989e-06
000031	2016-06-30	00005	1813731596	8638	4.76256e-06
000031	2016-12-31	00005	1813731596	11517	6.34989e-06
000031	2017-06-30	00005	1813731596	8638	4.76256e-06
000031	2018-06-30	00005	1813731596	8788	4.84526e-06
000031	2019-02-25	00060	3925870338	8788	2.23848e-06
000031	2019-06-30	00005	3925870338	8638	2.20028e-06
000031	2020-01-03	00060	4286313339	8638	2.01525e-06
000031	2020-06-30	00005	4286313339	56638	1.32137e-05
000031	2021-01-06	05000	4286313339	56638	1.32137e-05
000031	2021-06-30	00005	4286313339	8638	2.01525e-06
000031	2022-08-26	05000	4286313339	8638	2.01525e-06
000031	2023-12-31	00005	4286313339	11517	2.68692e-06
000031	2024-06-30	00005	4286313339	8638	2.01525e-06
000032	1994-08-26	20000	118920000	211000	0.0017743
000032	1995-08-24	01000	130811997	234964	0.0017962
000032	1996-12-31	00008	130811997	234964	0.0017962
000032	2006-02-07	07000	194053600	50626	0.000260887
000032	2009-02-09	00009	232864320	45156	0.000193915
000032	2013-06-30	00005	232864320	37820	0.000162412
000032	2014-06-30	00005	232864320	37228	0.00015987
000032	2014-12-31	00005	232864320	23192	9.95945e-05
000032	2015-06-30	00005	232864320	1081	4.64219e-06
000032	2015-12-30	00060	351878445	1081	3.07208e-06
000032	2016-06-16	01000	422254134	1297	3.07161e-06
000032	2019-01-02	05000	413219661	1150395	0.00278398
000032	2020-06-30	00005	413219661	1009946	0.00244409
000032	2021-05-14	00060	1071231478	1009946	0.00094279
000032	2021-11-16	00060	1138744840	1009946	0.000886894
000032	2021-12-31	00005	1138744840	1346760	0.00118267
000032	2022-05-18	05000	1138744840	1346760	0.00118267
000033	1994-09-19	20000	252000000	209000	0.000829365
000033	1995-05-09	00100	274022370	209000	0.000762711
000033	2006-04-13	07000	329402050	9720	2.9508e-05
000033	2006-12-27	60000	329402050	9720	2.9508e-05
000033	2007-04-18	00009	329402050	9720	2.9508e-05
000033	2007-12-31	00008	329402050	9720	2.9508e-05
000034	2008-07-14	07000	357973531	6523	1.8222e-05
000034	2009-07-28	00009	357973531	6523	1.8222e-05
000034	2010-08-06	00008	357973531	6523	1.8222e-05
000034	2010-08-09	00009	357973531	6523	1.8222e-05
000034	2010-12-31	00008	357973531	6523	1.8222e-05
000034	2011-07-21	00008	357973531	5055	1.41212e-05
000034	2011-07-22	00009	357973531	5055	1.41212e-05
000034	2012-06-30	00005	357973531	3954	1.10455e-05
000034	2015-12-31	00005	357973531	11454	3.19968e-05
000034	2016-03-01	00060	654070434	64614454	0.0987882
000034	2016-08-29	00008	654070434	219380803	0.335409
000034	2016-08-30	00008	654070434	219380803	0.335409
000034	2016-12-31	00005	654070434	219366400	0.335387
000034	2017-06-30	00008	654070434	219366400	0.335387
000034	2019-03-05	00005	654070434	219446693	0.335509
000034	2019-03-06	05000	654070434	219446693	0.335509
000034	2019-04-03	05000	654070434	164601492	0.251657
000034	2019-07-05	00070	654070434	166826492	0.255059
000034	2019-12-31	00005	654070434	171183242	0.26172
000034	2020-06-02	00005	654070434	161408852	0.246776
000034	2020-07-20	00008	654070434	160775102	0.245807
000034	2020-11-26	00070	659467906	160779752	0.243802
000034	2020-11-30	06000	659458406	160779752	0.243806
000034	2020-12-31	00070	659560727	160796252	0.243793
000034	2021-06-01	00070	659656902	159584797	0.241921
000034	2021-06-30	00070	659864448	159587047	0.241848
000034	2021-08-06	00070	659876921	159584797	0.24184
000034	2021-08-18	00005	659876921	159589297	0.241847
000034	2021-08-23	00008	659876921	159283408	0.241384
000034	2021-10-22	00070	660737491	159312797	0.241114
000034	2021-10-28	00005	660737491	120523292	0.182407
000034	2021-10-29	06000	660608991	120523292	0.182443
000034	2021-12-31	00070	660723186	120834792	0.182883
000034	2022-02-16	00070	660767319	120835167	0.182871
000034	2022-03-10	00070	660821770	120835167	0.182856
000034	2022-03-11	06000	660278685	120835167	0.183006
000034	2022-06-30	00070	661927336	119930417	0.181184
000034	2022-07-22	00070	662522176	119928167	0.181018
000034	2022-08-08	00008	662522176	119928167	0.181018
000034	2022-10-31	00070	663802099	119928167	0.180669
000034	2022-11-01	06000	663660099	119904167	0.180671
000034	2022-12-31	00070	668456346	119906417	0.179378
000034	2023-06-30	00070	669580180	119222459	0.178056
000034	2023-12-31	00070	669581480	119121190	0.177904
000034	2024-06-28	40000	669581817	118453853	0.176907
000034	2024-06-30	00005	669581817	118766103	0.177374
000034	2024-09-30	40000	669582746	118391927	0.176814
000035	1994-11-09	20000	81040000	102400	0.00126357
000035	1995-02-28	00100	105352000	102400	0.00097198
000035	1995-10-18	01000	115887200	102400	0.000883618
000035	1998-12-31	60000	115887200	102400	0.000883618
000035	2007-01-16	07000	150006560	213714	0.0014247
000035	2008-01-18	00005	150006560	22950	0.000152993
000035	2008-01-21	00009	150006560	22950	0.000152993
000035	2008-12-31	00005	150006560	19800	0.000131994
000035	2014-05-28	00060	567104959	43950614	0.0775
000035	2014-09-24	00060	619278871	43950614	0.0709706
000035	2014-12-31	00005	619278871	43950736	0.0709708
000035	2015-06-02	00005	619278871	43950614	0.0709706
000035	2015-06-03	05000	619278871	43950614	0.0709706
000035	2015-09-22	00005	619278871	46200614	0.0746039
000035	2015-09-25	05000	619278871	46200614	0.0746039
000035	2016-05-20	00005	619278871	43950614	0.0709706
000035	2016-05-27	01000	1238557742	87901228	0.0709706
000035	2016-11-11	00005	1238557742	87907228	0.0709755
000035	2016-12-05	00008	1238557742	87907228	0.0709755
000035	2016-12-31	00008	1238557742	87907228	0.0709755
000035	2017-05-31	05000	1238557742	70431921	0.0568661
000035	2017-07-25	00060	1351521423	70431921	0.0521131
000035	2018-07-27	05000	1351521423	70431921	0.0521131
000035	2019-01-31	00060	2438736365	70431921	0.0288805
000035	2019-10-22	00060	2523777297	70431921	0.0279073
000035	2020-02-04	05000	2523777297	70431921	0.0279073
000035	2020-10-23	05000	2523777297	70431921	0.0279073
000035	2024-06-30	00005	2523777297	73870296	0.0292697
000036	2006-03-28	07000	1123887712	7187	6.39477e-06
000036	2013-12-31	00005	1123887712	7500	6.67326e-06
000036	2015-07-07	00070	1140487712	8007500	0.00702112
000036	2016-07-05	06000	1139687712	7207500	0.0063241
000036	2016-07-12	00008	1139687712	5407500	0.00474472
000036	2016-08-19	00070	1141587712	5707500	0.00499962
000036	2017-05-23	06000	1141487712	5707500	0.00500005
000036	2017-07-07	00008	1141487712	3832500	0.00335746
000036	2017-12-31	00005	1141487712	2677500	0.00234562
000036	2018-06-15	00005	1141487712	5144250	0.00450662
000036	2018-06-19	00008	1141487712	3344250	0.00292973
000036	2018-07-03	00005	1141487712	5144250	0.00450662
000036	2018-07-05	00008	1141487712	5069250	0.00444092
000036	2018-12-31	00005	1141487712	6089527	0.00533473
000036	2019-06-24	00005	1141487712	6854402	0.0060048
000036	2019-06-28	03000	1483934025	8910722	0.0060048
000036	2019-12-31	00005	1483934025	4933371	0.00332452
000036	2020-06-30	00005	1483934025	4459595	0.00300525
000036	2020-12-31	00005	1483934025	4933371	0.00332452
000036	2021-06-30	00005	1483934025	4258773	0.00286992
000036	2024-01-11	00005	1483934025	3274580	0.00220669
000036	2024-06-30	00005	1483934025	3260055	0.0021969
000037	2006-03-28	07000	547965998	20127	3.67304e-05
000037	2007-04-03	00009	547965998	20127	3.67304e-05
000037	2007-12-31	00005	547965998	11812	2.15561e-05
000037	2008-07-04	03000	602762596	12993	2.15558e-05
000037	2008-08-04	00009	602762596	12993	2.15558e-05
000037	2008-09-05	70000	602762596	12993	2.15558e-05
000037	2009-05-27	00009	602762596	12993	2.15558e-05
000037	2011-06-30	00005	602762596	18263	3.02988e-05
000037	2014-12-31	00005	602762596	20020	3.32137e-05
000037	2015-06-30	00005	602762596	12993	2.15558e-05
000037	2017-12-31	00005	602762596	14138	2.34553e-05
000037	2021-06-30	00005	602762596	14521	2.40907e-05
000037	2021-12-31	00005	602762596	12994	2.15574e-05
000037	2023-06-30	00005	602762596	17325	2.87427e-05
000037	2023-12-31	00005	602762596	12994	2.15574e-05
000038	2017-02-13	00008	326735887	24205435	0.0740826
000038	2017-02-15	05000	326735887	18557835	0.0567977
000038	2017-02-28	00005	326735887	24205635	0.0740832
000038	2017-03-02	00008	326735887	24205635	0.0740832
000038	2017-05-12	05000	326735887	24205635	0.0740832
000038	2017-06-30	00005	326735887	24185435	0.0740214
000038	2017-07-06	01000	522777419	38696696	0.0740214
000038	2017-12-31	00005	522777419	38728696	0.0740826
000038	2018-04-03	00005	522777419	37046522	0.0708648
000038	2018-04-10	05000	522777419	37046522	0.0708648
000038	2018-04-13	00008	522777419	37046522	0.0708648
000038	2018-06-04	00008	522777419	37046522	0.0708648
000038	2018-06-05	05000	522777419	27364348	0.0523442
000038	2018-07-13	00005	522777419	37046522	0.0708648
000038	2018-07-17	00008	522777419	37046522	0.0708648
000038	2019-03-14	00005	522777419	38728706	0.0740826
000038	2019-03-15	05000	522777419	38728706	0.0740826
000038	2019-07-23	00005	522777419	24034516	0.0459747
000038	2019-07-24	05000	522777419	24034516	0.0459747
000038	2019-11-08	00005	522777419	24034741	0.0459751
000038	2019-11-11	05000	522777419	24034741	0.0459751
000038	2019-12-31	00005	522777419	23529083	0.0450078
000038	2020-06-30	00005	522777419	17427914	0.0333372
000038	2022-07-07	00008	522777419	17427914	0.0333372
000039	1998-06-30	01000	340201398	463262	0.00136173
000039	2002-06-13	03000	510302096	346332	0.00067868
000039	2003-12-05	00002	630302096	346332	0.00054947
000039	2005-04-25	03000	2016966706	624624	0.000309685
000039	2006-07-20	03000	2218663376	687086	0.000309685
000039	2007-06-01	03000	2662396051	824503	0.000309685
000039	2007-09-04	00005	2662396051	618377	0.000232263
000039	2007-09-05	00009	2662396051	618377	0.000232263
000039	2008-07-02	00009	2662396051	618377	0.000232263
000039	2008-12-31	00005	2662396051	620177	0.000232939
000039	2009-06-15	00009	2662396051	620177	0.000232939
000039	2011-12-31	00005	2662396051	372826	0.000140034
000039	2012-12-19	00008	2662396051	372826	0.000140034
000039	2012-12-31	00005	2662396051	371026	0.000139358
000039	2013-12-31	00005	2662396051	700828	0.000263232
000039	2014-06-30	00005	2664588601	446026	0.00016739
000039	2014-09-26	00070	2672628551	446026	0.000166887
000039	2014-12-31	00005	2672628551	633526	0.000237042
000039	2015-06-30	00070	2687085016	633526	0.000235767
000039	2015-12-30	00070	2691673586	633526	0.000235365
000039	2015-12-31	00060	2977819686	866026	0.000290826
000039	2016-06-30	00070	2978359386	887026	0.000297824
000039	2016-07-29	00070	2978363886	887026	0.000297823
000039	2016-11-30	00070	2978515886	887026	0.000297808
000039	2016-12-31	00070	2978576986	699526	0.000234852
000039	2017-01-26	00070	2978606986	699526	0.00023485
000039	2017-02-28	00070	2979268186	699526	0.000234798
000039	2017-05-31	00070	2979364986	699526	0.00023479
000039	2017-06-30	00070	2980352786	728026	0.000244275
000039	2017-07-31	00070	2980591186	728026	0.000244256
000039	2017-09-30	00070	2981395686	728026	0.00024419
000039	2017-11-30	00070	2981988936	728026	0.000244141
000039	2017-12-31	00070	2982889136	500026	0.000167631
000039	2018-01-31	00070	2984512836	500026	0.00016754
000039	2018-02-28	00070	2984696636	500026	0.00016753
000039	2018-04-30	00070	2984716636	500026	0.000167529
000039	2018-05-31	00070	2984796136	500026	0.000167524
000039	2018-06-30	00070	2984956336	880526	0.000294988
000039	2018-07-31	00070	2984959336	880526	0.000294988
000039	2018-09-30	00070	2984961436	880526	0.000294987
000039	2018-12-31	00070	2984988936	762526	0.000255454
000039	2019-01-31	00070	2984993936	762526	0.000255453
000039	2019-02-28	00070	2985059936	762526	0.000255447
000039	2019-03-31	00070	2985111236	762526	0.000255443
000039	2019-05-31	00070	2985442236	762526	0.000255415
000039	2019-06-28	01000	3582530682	915031	0.000255415
000039	2019-07-31	00070	3582725682	915031	0.000255401
000039	2019-09-30	00070	3583148682	915031	0.000255371
000039	2019-11-30	00070	3583536482	915031	0.000255343
000039	2019-12-31	00070	3584504382	850232	0.000237197
000039	2020-01-31	00070	3585999402	850232	0.000237098
000039	2020-02-29	00070	3586059802	850232	0.000237094
000039	2020-03-31	00070	3586074802	850232	0.000237093
000039	2020-07-31	00070	3586745482	850232	0.000237048
000039	2020-09-30	00070	3595013590	850232	0.000236503
000039	2021-09-28	00008	3595013590	850232	0.000236503
000039	2021-12-31	00008	3595013590	850232	0.000236503
000039	2022-08-18	01000	5392520385	1275348	0.000236503
000039	2023-12-31	00005	5392520385	1275349	0.000236503
000042	1995-04-10	20000	56300000	172400	0.00306217
000042	1995-06-07	01000	106970000	172400	0.00161167
000042	1996-07-15	01000	139061000	374163	0.00269064
000042	1997-03-17	00100	171045030	460217	0.00269062
000042	1997-07-04	01000	239463040	489103	0.0020425
000042	2004-12-15	60000	239463040	489103	0.0020425
000042	2006-09-01	07000	239463040	201561	0.000841721
000042	2007-09-10	00009	239463040	151170	0.000631287
000042	2008-06-30	00005	239463040	141786	0.0005921
000042	2008-10-10	00009	239463040	141786	0.0005921
000042	2009-09-16	00009	239463040	141786	0.0005921
000042	2010-06-30	00005	239463040	94507	0.000394662
000042	2011-06-30	00005	239463040	103439	0.000431962
000042	2011-12-31	00005	239463040	67712	0.000282766
000042	2014-06-12	03000	478926080	135424	0.000282766
000042	2015-06-30	00005	478926080	135422	0.000282762
000042	2015-09-25	00005	478926080	143297	0.000299205
000042	2015-09-28	00070	488234980	4594797	0.00941104
000042	2015-12-25	00060	665069639	4594797	0.00690875
000042	2016-05-26	00005	665069639	4530617	0.00681224
000042	2016-05-27	06000	664831139	4530617	0.00681469
000042	2016-07-13	00008	664831139	4530617	0.00681469
000042	2016-09-13	00008	664831139	4530617	0.00681469
000042	2016-09-14	00008	664831139	3417742	0.00514077
000042	2016-12-31	00005	664831139	3481922	0.0052373
000042	2018-06-30	00005	664831139	2560650	0.00385158
000042	2018-12-26	00005	664831139	2779300	0.00418046
000042	2018-12-28	05000	664831139	2779300	0.00418046
000042	2019-06-30	00005	664831139	2628675	0.0039539
000042	2019-12-31	00005	664831139	2681175	0.00403287
000042	2020-06-30	00005	664831139	2489625	0.00374475
000042	2020-12-31	00005	664831139	2143175	0.00322364
000042	2021-06-30	00005	664831139	861375	0.00129563
000042	2023-06-30	00005	664831139	841762	0.00126613
000042	2024-06-30	00005	664831139	869437	0.00130776
000043	1995-04-12	20000	91000000	267000	0.00293407
000043	1995-07-21	01000	118300000	228800	0.00193407
000043	1996-12-31	00008	118300000	228800	0.00193407
000043	1997-07-23	01000	130130000	251680	0.00193407
000043	1997-08-29	00100	139325472	320320	0.00229908
000043	2001-01-09	30000	139325472	187320	0.00134448
000043	2006-04-05	60000	139325472	21400	0.000153597
000043	2006-04-11	07000	139325472	27820	0.000199676
000043	2007-04-12	00009	139325472	27820	0.000199676
000043	2007-06-30	00005	139325472	20475	0.000146958
000043	2007-08-30	00060	195325472	20475	0.000104825
000043	2007-09-19	00060	222320472	20475	9.20968e-05
000043	2008-04-16	00009	222320472	20475	9.20968e-05
000043	2008-09-25	05000	222320472	20475	9.20968e-05
000043	2008-12-31	00008	222320472	20475	9.20968e-05
000043	2010-09-28	05000	222320472	20475	9.20968e-05
000043	2011-04-14	00005	222320472	27300	0.000122796
000043	2011-04-15	00009	222320472	27300	0.000122796
000043	2011-06-16	03000	333480708	40950	0.000122796
000043	2011-12-31	00005	333480708	3600	1.07952e-05
000043	2012-05-17	01000	666961416	7200	1.07952e-05
000043	2013-06-30	00005	666961416	9600	1.43936e-05
000043	2015-12-31	00005	666961416	180750	0.000271005
000043	2017-12-31	00005	666961416	154250	0.000231273
000043	2018-06-30	00005	666961416	141750	0.000212531
000043	2019-06-30	00005	666961416	168000	0.000251889
000043	2019-12-04	00060	1060346060	168000	0.000158439
000045	1995-02-22	20000	123800000	222000	0.00179321
000045	1997-08-06	01000	163416000	266400	0.0016302
000045	2004-07-09	03000	245124000	399600	0.0016302
000045	2006-09-11	07000	245124000	142128	0.000579821
000045	2007-12-31	00005	245124000	47588	0.000194138
000045	2008-09-11	00009	245124000	47588	0.000194138
000045	2009-09-25	00009	245124000	47587	0.000194134
000045	2009-12-31	00005	245124000	122626	0.000500261
000045	2010-07-29	00060	336521849	122626	0.000364392
000045	2010-12-31	00005	336521849	75038	0.000222981
000045	2011-08-16	05000	336521849	75038	0.000222981
000045	2013-03-25	00060	506521849	75038	0.000148144
000045	2013-08-12	05000	506521849	75038	0.000148144
000045	2013-12-31	00005	506521849	76800	0.000151622
000045	2014-03-28	00005	506521849	69750	0.000137704
000045	2014-04-01	05000	506521849	69750	0.000137704
000045	2016-03-29	05000	506521849	69750	0.000137704
000045	2017-12-22	00005	506521849	72000	0.000142146
000045	2017-12-27	00070	511274149	810000	0.00158428
000045	2018-06-30	00005	511274149	815250	0.00159455
000045	2019-09-11	00005	511274149	810000	0.00158428
000045	2019-09-12	06000	509338429	514800	0.00101072
000045	2019-12-31	00005	509338429	520050	0.00102103
000045	2020-06-30	00005	509338429	518775	0.00101853
000045	2020-11-11	00005	509338429	514800	0.00101072
000045	2020-11-12	06000	507772279	297375	0.000585646
000045	2021-05-13	06000	506521849	77300	0.000152609
000045	2021-09-01	00008	506521849	77300	0.000152609
000045	2021-12-31	00005	506521849	72000	0.000142146
000045	2024-06-30	00005	506521849	72750	0.000143627
000048	1995-05-15	20000	82800000	195000	0.00235507
000048	1996-06-18	01000	132480000	240000	0.00181159
000048	1997-07-17	00100	157314280	285000	0.00181166
000048	2008-06-30	00008	390768671	11250	2.87894e-05
000048	2010-06-30	00005	390768671	8437	2.15908e-05
000048	2015-06-30	00005	390768671	1289182	0.00329909
000048	2015-07-07	00008	390768671	6657182	0.0170361
000048	2015-12-31	00005	390768671	5377405	0.0137611
000048	2016-06-30	00005	390768671	5376404	0.0137585
000048	2017-09-14	00008	390768671	5376404	0.0137585
000048	2018-12-31	00005	390768671	7148131	0.0182925
000048	2019-06-30	00005	390768671	61223	0.000156673
000048	2019-11-08	01000	402491731	63060	0.000156674
000048	2020-06-30	00005	402491731	84080	0.000208899
000048	2020-12-31	00005	402491731	63060	0.000156674
000048	2021-05-10	03000	523239250	81978	0.000156674
000048	2023-12-06	00070	530569250	1600000	0.00301563
000049	2005-12-27	07000	136829159	12800	9.35473e-05
000049	2007-05-15	00009	136829159	12800	9.35473e-05
000049	2007-11-29	00008	136829159	60000	0.000438503
000049	2007-11-30	00009	136829159	60000	0.000438503
000049	2007-12-31	00005	136829159	45000	0.000328877
000049	2008-12-31	00005	136829160	75000	0.000548129
000049	2009-02-13	00005	136829159	56250	0.000411097
000049	2009-02-18	00009	136829159	56250	0.000411097
000049	2010-01-26	00009	136829160	56250	0.000411097
000049	2010-06-30	00005	136829160	42187	0.000308319
000049	2019-09-12	00070	207197738	150000	0.000723946
000049	2021-05-11	03000	300436720	217500	0.000723946
000049	2021-07-08	06000	300407720	217500	0.000724016
000049	2021-09-13	00008	300407720	163125	0.000543012
000049	2021-11-05	06000	300298970	163125	0.000543209
000049	2021-12-31	00005	300298970	145002	0.000482859
000049	2022-06-15	00005	300298970	163125	0.000543209
000049	2022-06-16	06000	300271902	163125	0.000543258
000049	2022-09-13	00008	300271902	108750	0.000362172
000049	2022-11-03	00005	300271902	177625	0.000591547
000049	2022-11-04	06000	299386862	105121	0.000351121
000049	2023-06-30	00005	299386862	108746	0.000363229
000049	2023-12-08	00100	384638534	108746	0.000282723
000049	2023-12-31	00005	384638534	141371	0.000367542
000050	1995-09-25	20000	75500000	96800	0.00128212
000050	1996-06-10	01000	83050000	67980	0.000818543
000050	1997-07-09	01000	91355000	74778	0.000818543
000050	2001-12-31	00005	132770000	44580	0.000335769
000050	2004-05-28	03000	265540000	89160	0.000335769
000050	2006-04-17	00008	265540000	52200	0.000196581
000050	2006-04-26	07000	265540000	68904	0.000259486
000050	2006-06-09	03000	331925000	86130	0.000259486
000050	2007-04-27	00009	331925000	86130	0.000259486
000050	2007-06-30	00005	331925000	64597	0.000194613
000050	2007-08-24	00060	382825000	64597	0.000168738
000050	2007-12-31	00005	382825000	65130	0.00017013
000050	2008-04-26	00005	382825000	48847	0.000127596
000050	2008-04-29	00009	382825000	48847	0.000127596
000050	2008-08-29	05000	382825000	48847	0.000127596
000050	2008-10-08	03000	574237500	73270	0.000127595
000050	2009-05-08	00009	574237500	73270	0.000127595
000050	2010-12-31	00005	574237500	22500	3.91824e-05
000050	2011-05-10	00005	574237500	16875	2.93868e-05
000050	2011-05-12	00009	574237500	16875	2.93868e-05
000050	2011-12-31	00005	574237500	22500	3.91824e-05
000050	2014-09-10	00005	574237500	16875	2.93868e-05
000050	2014-09-11	00060	1010806342	16875	1.66946e-05
000050	2014-09-26	00060	1131738475	16875	1.49107e-05
000050	2015-09-11	00005	1131738475	90300	7.97888e-05
000050	2015-09-14	05000	1131738475	90300	7.97888e-05
000050	2015-09-29	05000	1131738475	90300	7.97888e-05
000050	2016-01-14	00060	1401098744	90300	6.44494e-05
000050	2016-06-30	00005	1401098744	100700	7.18722e-05
000050	2017-01-13	00005	1401098744	90075	6.42888e-05
000050	2017-01-17	05000	1401098744	90075	6.42888e-05
000050	2017-06-30	00005	1401098744	82575	5.89359e-05
000050	2017-09-15	05000	1401098744	82575	5.89359e-05
000050	2017-12-31	00005	1401098744	84500	6.03098e-05
000050	2018-02-01	00060	2048123051	84500	4.12573e-05
000050	2018-06-30	00005	2048123051	128825	6.28991e-05
000050	2019-02-12	00005	2048123051	109800	5.36101e-05
000050	2019-02-13	05000	2048123051	109800	5.36101e-05
000050	2019-07-17	05000	2048123051	109800	5.36101e-05
000050	2019-12-31	00005	2048123051	46950	2.29234e-05
000050	2020-06-30	00005	2048123051	49650	2.42417e-05
000050	2020-08-24	00060	2457747661	49650	2.02014e-05
000050	2020-12-31	00005	2457747661	46950	1.91029e-05
000050	2021-03-10	00005	2457747661	47700	1.9408e-05
000050	2021-03-11	05000	2457747661	47700	1.9408e-05
000050	2021-06-30	00005	2457747661	49650	2.02014e-05
000050	2021-07-30	00005	2457747661	49650	2.02014e-05
000050	2021-08-03	05000	2457747661	49650	2.02014e-05
000050	2021-12-31	00005	2457747661	49625	2.01913e-05
000050	2022-03-08	00005	2457747661	49062	1.99622e-05
000050	2022-03-11	05000	2457747661	49062	1.99622e-05
000050	2022-06-30	00005	2457747661	46387	1.88738e-05
000050	2023-06-30	00005	2457747661	28575	1.16265e-05
000050	2024-07-29	05000	2457747661	28575	1.16265e-05
000055	1996-12-31	20000	210000000	67200	0.00032
000055	1997-06-23	00002	240000000	67200	0.00028
000055	1998-11-20	01000	288000000	80640	0.00028
000055	2001-07-20	70000	296400000	96180	0.000324494
000055	2006-04-10	07000	352716000	78775	0.000223338
000055	2007-04-25	00009	352716000	78775	0.000223338
000055	2007-05-11	03000	387987600	86653	0.00022334
000055	2007-06-30	00005	387987600	70658	0.000182114
000055	2007-12-31	00005	387987600	59158	0.000152474
000055	2008-04-28	00009	387987600	59158	0.000152474
000055	2008-06-19	03000	426786359	65073	0.000152472
000055	2009-04-17	00009	426786359	65073	0.000152472
000055	2010-04-06	03000	456661404	69628	0.000152472
000055	2010-06-21	00060	504606604	69628	0.000137985
000055	2011-04-26	03000	756909906	104442	0.000137985
000055	2011-07-15	05000	756909906	104442	0.000137985
000055	2013-12-31	00005	756909906	779292	0.00102957
000055	2015-12-31	00005	756909906	972042	0.00128422
000055	2016-07-29	00060	789094836	972042	0.00123184
000055	2017-05-12	01000	1183642254	1458063	0.00123184
000055	2017-06-30	00005	1183642254	1471672	0.00124334
000055	2017-08-07	05000	1183642254	1471672	0.00124334
000055	2017-12-31	00005	1183642254	1417242	0.00119736
000055	2018-08-29	06000	1155481686	1417242	0.00122654
000055	2019-01-11	06000	1123384189	1431568	0.00127434
000055	2020-05-14	00005	1123384189	1442943	0.00128446
000055	2020-05-20	06000	1088278951	1442943	0.00132589
000055	2020-12-31	00005	1088278951	2302093	0.00211535
000055	2021-04-23	06000	1073874227	2302093	0.00214373
000055	2022-06-30	00005	1073874227	3839293	0.00357518
000055	2023-06-30	00005	1073874227	3861043	0.00359543
000056	2006-01-06	77000	220901184	427680	0.00193607
000056	2007-01-10	00009	220901184	427680	0.00193607
000056	2008-01-29	00005	220901184	320760	0.00145205
000056	2008-01-30	00009	220901184	320760	0.00145205
000056	2009-01-19	00009	220901184	320760	0.00145205
000056	2010-12-31	00005	220901184	427680	0.00193607
000056	2011-12-31	00005	220901184	340431	0.0015411
000056	2014-08-08	01000	265081420	408517	0.0015411
000056	2015-09-08	00060	573892434	408517	0.000711835
000056	2016-07-08	01000	1147784868	817034	0.000711835
000056	2017-08-07	00070	1175345368	8125734	0.00691349
000056	2018-06-30	00005	1175345368	8337419	0.00709359
000056	2018-09-10	05000	1175345368	8337419	0.00709359
000056	2020-01-02	00005	1175345368	8341844	0.00709736
000056	2020-01-03	06000	1174528720	8341844	0.00710229
000056	2022-12-20	00005	1174528720	8684751	0.00739424
000056	2022-12-31	00008	1174528720	8684751	0.00739424
000056	2023-03-23	00070	1210088720	19984751	0.0165151
000056	2023-06-30	00005	1210088720	18613125	0.0153816
000056	2024-06-30	00005	1210088720	18670350	0.0154289
000058	2006-06-14	07000	784799010	60482	7.70669e-05
000058	2007-06-14	00009	784799010	45361	5.77995e-05
000058	2008-01-16	00005	784799010	45239	5.76441e-05
000058	2008-01-17	00009	784799010	45239	5.76441e-05
000058	2008-10-21	00008	784799010	48498	6.17967e-05
000058	2008-10-23	00009	784799010	48498	6.17967e-05
000058	2008-12-10	00009	784799010	48498	6.17967e-05
000058	2009-06-23	00005	784799010	35464	4.51886e-05
000058	2009-06-25	00009	784799010	35464	4.51886e-05
000058	2014-06-30	00005	784799010	26689	3.40074e-05
000058	2015-12-31	00005	784799010	71689	9.1347e-05
000058	2016-12-31	00005	784799010	77439	9.86737e-05
000058	2017-03-03	00060	1235656249	77439	6.26703e-05
000058	2017-06-30	00005	1235656249	66439	5.37682e-05
000058	2017-12-31	00005	1235656249	189939	0.000153715
000058	2018-06-30	00005	1235656249	343090	0.000277658
000058	2018-12-31	00005	1235656249	328393	0.000265764
000058	2019-06-30	00005	1235656249	313693	0.000253868
000058	2019-12-31	00005	1235656249	345219	0.000279381
000058	2020-06-30	00005	1235656249	137250	0.000111075
000058	2022-04-15	06000	1231200672	137250	0.000111477
000058	2022-07-15	05000	1231200672	137250	0.000111477
000058	2023-06-30	00005	1231200672	124425	0.00010106
000058	2023-12-31	00005	1231200672	129425	0.000105121
000058	2024-06-30	00005	1231200672	109425	8.88767e-05
000059	2013-06-30	00005	1200506367	6144	5.11784e-06
000059	2014-12-29	00005	1200506367	4608	3.83838e-06
000059	2014-12-30	00060	1599442537	4608	2.881e-06
000059	2015-07-13	00008	1599442537	4608	2.881e-06
000059	2016-01-07	00008	1599442537	3456	2.16075e-06
000059	2016-01-08	05000	1599442537	3456	2.16075e-06
000059	2018-01-02	05000	1599442537	3456	2.16075e-06
000059	2020-06-30	00005	1599442537	33006	2.06359e-05
000059	2020-12-31	00005	1599442537	3456	2.16075e-06
000059	2021-06-30	00005	1599442537	44008	2.75146e-05
000060	2005-11-18	07000	432000000	360576	0.000834667
000060	2006-04-20	03000	604800000	1176806	0.00194578
000060	2006-11-16	00060	664800000	1176806	0.00177017
000060	2006-11-20	00009	664800000	1176806	0.00177017
000060	2007-01-16	00009	664800000	1176806	0.00177017
000060	2007-05-22	03000	731280000	1294487	0.00177017
000060	2007-11-20	60000	731280000	673706	0.00092127
000060	2007-11-21	05000	731280000	673706	0.00092127
000060	2008-12-31	00005	1023792000	1118646	0.00109265
000060	2009-06-30	00005	1023792000	1121796	0.00109573
000060	2009-11-20	00005	1023792000	1123296	0.00109719
000060	2009-11-24	05000	1023792000	1123296	0.00109719
000060	2009-12-01	00009	1023792000	1123296	0.00109719
000060	2010-04-27	00005	1023792000	1071459	0.00104656
000060	2010-05-05	03000	1586877600	1660761	0.00104656
000060	2011-05-06	03000	2062940880	2158989	0.00104656
000060	2011-06-30	00005	2062940880	2251675	0.00109149
000060	2011-12-31	00005	2062940880	1881872	0.000912228
000060	2012-06-30	00005	2062940880	1684414	0.000816511
000060	2013-06-30	00005	2062940880	1917439	0.000929469
000060	2013-12-31	00005	2062940880	1929542	0.000935336
000060	2014-06-30	00005	2062940880	1900930	0.000921466
000060	2014-12-31	00005	2062940880	2198925	0.00106592
000060	2015-03-16	00005	2062940880	1414378	0.000685612
000060	2015-03-17	00060	2212627938	1414378	0.00063923
000060	2015-06-30	00005	2212627938	1518308	0.000686201
000060	2016-03-17	00005	2212627938	1140459	0.000515432
000060	2016-03-18	05000	2212627938	1140459	0.000515432
000060	2016-06-30	00005	2212627938	1174412	0.000530777
000060	2016-12-31	00005	2212627938	1038601	0.000469397
000060	2017-06-30	00005	2212627938	1538478	0.000695317
000060	2017-07-03	00060	2379790218	1538478	0.000646476
000060	2017-12-31	00005	2379790218	963070	0.000404687
000060	2018-05-16	01000	3569685327	1444605	0.000404687
000060	2018-07-02	00005	3569685327	1463620	0.000410014
000060	2018-07-04	05000	3569685327	1463620	0.000410014
000060	2018-12-31	00005	3569685327	1459232	0.000408784
000060	2019-06-30	00005	3569685327	1447638	0.000405537
000060	2019-12-31	00005	3569685327	1287446	0.000360661
000060	2020-06-30	00005	3569685327	1214177	0.000340136
000060	2020-12-31	00005	3569685327	1299384	0.000364005
000060	2021-03-31	40000	3569920299	1089850	0.000305287
000060	2021-06-30	40000	3569949024	1089850	0.000305284
000060	2021-09-30	40000	3650018990	1127425	0.000308882
000060	2021-12-31	40000	3650034613	1198675	0.000328401
000060	2022-03-31	40000	3650044726	330000	9.04099e-05
000060	2022-06-30	40000	3737542102	258750	6.923e-05
000060	2022-09-30	40000	3737543400	258750	6.923e-05
000060	2022-12-31	40000	3737543730	258750	6.923e-05
000060	2023-03-31	00005	3737543730	281250	7.525e-05
000060	2023-06-30	40000	3737544918	281250	7.52499e-05
000060	2023-09-30	40000	3737586804	281250	7.52491e-05
000060	2023-12-31	40000	3737589506	281250	7.5249e-05
000060	2024-03-31	40000	3737590181	275625	7.3744e-05
000060	2024-06-30	40000	3737590653	286875	7.6754e-05
000060	2024-09-30	40000	3737591106	286875	7.6754e-05
000061	2009-05-26	00005	452063442	10255571	0.0226861
000061	2009-06-03	03000	768507851	17434470	0.0226861
000061	2010-04-27	00005	768507851	13958648	0.0181633
000061	2010-04-29	00009	768507851	13958648	0.0181633
000061	2010-06-30	00005	768507851	9778192	0.0127236
000061	2011-07-09	00005	768507851	7709856	0.0100322
000061	2011-07-12	05000	768507851	7709856	0.0100322
000061	2012-05-04	00005	768507851	7513167	0.0097763
000061	2012-05-10	03000	1383314131	13523700	0.0097763
000061	2013-01-23	00060	1696964131	13523700	0.00796935
000061	2013-06-30	00005	1696964131	14995466	0.00883664
000061	2013-12-31	00005	1696964131	9108401	0.00536747
000061	2014-01-22	00005	1696964131	7396761	0.00435882
000061	2014-01-24	05000	1696964131	7396761	0.00435882
000061	2014-12-31	00005	1696964131	7216761	0.00425275
000061	2015-06-30	00005	1696964131	5413247	0.00318996
000061	2015-12-31	00005	1696964131	5583945	0.00329055
000061	2016-01-22	00005	1696964131	5434585	0.00320253
000061	2016-01-25	05000	1696964131	5434585	0.00320253
000061	2016-06-30	00005	1696964131	5437610	0.00320432
000061	2016-12-31	00005	1696964131	5425510	0.00319719
000061	2017-06-30	00005	1696964131	6561850	0.00386682
000061	2017-12-31	00005	1696964131	1626913	0.00095872
000061	2018-06-30	00005	1696964131	1959057	0.00115445
000061	2018-12-31	00005	1696964131	1542898	0.000909211
000061	2019-06-30	00005	1696964131	1547898	0.000912157
000061	2019-12-31	00005	1696964131	1543648	0.000909653
000061	2020-06-30	00005	1696964131	1542898	0.000909211
000061	2020-12-31	00005	1696964131	363436	0.000214168
000061	2021-06-30	00005	1696964131	27375	1.61317e-05
000061	2022-04-28	00008	1696964131	27375	1.61317e-05
000061	2022-06-30	00008	1696964131	27375	1.61317e-05
000061	2023-12-31	00005	1696964131	31625	1.86362e-05
000061	2024-06-30	00005	1696964131	31125	1.83416e-05
000062	2006-05-15	07000	308931997	177357	0.000574097
000062	2006-12-31	00005	308931997	177857	0.000575716
000062	2007-12-31	00005	308931997	93068	0.000301257
000062	2008-12-31	00005	308931997	92674	0.000299982
000062	2009-11-23	00005	308931997	109277	0.000353725
000062	2009-11-24	00060	666949797	109277	0.000163846
000062	2010-06-30	00005	666949797	98232	0.000147285
000062	2010-12-31	00005	666949797	42868	6.42747e-05
000062	2012-06-30	00005	666949797	64659	9.69473e-05
000062	2012-12-10	00008	666949797	64659	9.69473e-05
000062	2012-12-17	05000	666949797	64659	9.69473e-05
000062	2012-12-31	00005	666949797	7500	1.12452e-05
000062	2015-06-30	00005	666949797	225	3.37357e-07
000062	2015-11-11	00060	721316774	1162816	0.00161207
000062	2016-12-31	00005	721316774	1162591	0.00161176
000062	2019-12-31	00005	1045909322	4950	4.73272e-06
000062	2020-06-30	00005	1045909322	5277	5.04537e-06
000062	2020-12-31	00005	1045909322	92044	8.80038e-05
000062	2022-06-30	00005	1045909322	97481	9.32022e-05
000062	2024-06-30	00005	1045909322	224640	0.00021478
000063	2005-12-29	07000	959521650	1282064	0.00133615
000063	2006-12-29	00009	959521650	1282064	0.00133615
000063	2007-12-31	00005	959521650	971991	0.001013
000063	2008-01-03	00009	959521650	971991	0.001013
000063	2008-07-04	00005	959521650	983875	0.00102538
000063	2008-07-10	03000	1343330310	1377425	0.00102538
000063	2008-12-25	00005	1343330310	1693914	0.00126098
000063	2008-12-29	00009	1343330310	1693914	0.00126098
000063	2009-05-27	00005	1343330310	1620904	0.00120663
000063	2009-06-05	03000	1746329402	2107175	0.00120663
000063	2009-07-23	00070	1831336215	72554280	0.0396182
000063	2010-01-21	00002	1889631015	72554280	0.038396
000063	2010-02-11	00005	1889631015	72136633	0.038175
000063	2010-02-12	90000	1911154456	72136633	0.0377451
000063	2010-02-26	00008	1911154456	71427051	0.0373738
000063	2010-06-03	00005	1911154456	71622224	0.0374759
000063	2010-06-04	00008	1911154456	46324158	0.0242388
000063	2010-06-18	00005	1911154456	46329473	0.0242416
000063	2010-06-24	03000	2866731684	69494209	0.0242416
000063	2010-06-30	00008	2866731684	6890602	0.00240364
000063	2010-12-15	00008	2866731684	6790711	0.0023688
000063	2010-12-31	00005	2866731684	6776761	0.00236393
000063	2011-07-01	00005	2866731684	6941735	0.00242148
000063	2011-07-07	03000	3440078020	8330082	0.00242148
000063	2011-12-31	00008	3440078020	8330082	0.00242148
000063	2012-06-30	00005	3440078020	8200315	0.00238376
000063	2012-12-21	00005	3440078020	8723815	0.00253594
000063	2012-12-24	00008	3440078020	8723815	0.00253594
000063	2013-06-30	00005	3440078020	8973734	0.00260858
000063	2013-09-03	00005	3440078020	7727140	0.00224621
000063	2013-09-04	06000	3437541278	7727140	0.00224787
000063	2013-12-31	00005	3437541278	7225715	0.002102
000063	2014-06-30	00005	3437541278	6665578	0.00193905
000063	2014-12-31	00005	3437541278	6770578	0.0019696
000063	2015-07-10	00005	3437541278	6037033	0.00175621
000063	2015-07-17	01000	4125049533	7244439	0.00175621
000063	2015-12-31	00070	4150791215	8851236	0.00213242
000063	2016-06-30	00070	4154242094	9230724	0.002222
000063	2016-12-31	00070	4184628172	4820945	0.00115206
000063	2017-06-30	00070	4190014530	5096481	0.00121634
000063	2017-12-31	00070	4192671843	3184710	0.00075959
000063	2018-06-30	00005	4192671843	3044966	0.000726259
000063	2018-12-31	00005	4192671843	3600968	0.000858872
000063	2019-06-30	00005	4192671843	3054116	0.000728441
000063	2019-12-31	00070	4227529869	493522	0.00011674
000063	2020-02-02	00070	4228030026	493522	0.000116726
000063	2020-02-03	00060	4609128994	493522	0.000107075
000063	2020-04-30	00070	4612352742	493522	0.000107
000063	2020-05-31	00070	4612927264	493522	0.000106987
000063	2020-06-30	00070	4613434832	579596	0.000125632
000063	2020-07-31	00070	4613434898	579596	0.000125632
000063	2021-02-03	00005	4613434898	565421	0.00012256
000063	2021-02-04	05000	4613434898	565421	0.00012256
000063	2021-07-31	00070	4637709675	565421	0.000121918
000063	2021-08-31	00070	4639281142	565421	0.000121877
000063	2021-09-30	00070	4642469460	565421	0.000121793
000063	2021-11-09	00060	4727790603	565421	0.000119595
000063	2021-11-30	00070	4729522244	565421	0.000119551
000063	2021-12-31	00070	4730795972	587921	0.000124275
000063	2022-01-31	00070	4731665005	587921	0.000124252
000063	2022-03-24	00070	4733590216	587921	0.000124202
000063	2022-03-31	00070	4733876968	587921	0.000124194
000063	2022-04-30	00070	4734044778	587921	0.00012419
000063	2022-05-31	00070	4734730011	587921	0.000124172
000063	2022-06-30	00070	4735828580	732243	0.000154618
000063	2022-07-31	00070	4736112508	732243	0.000154608
000063	2022-11-09	00005	4736112508	728243	0.000153764
000063	2022-11-10	05000	4736112508	728243	0.000153764
000063	2023-03-31	00070	4736587817	728243	0.000153748
000063	2023-04-30	00070	4739531486	728243	0.000153653
000063	2023-06-02	00070	4739672551	728243	0.000153648
000063	2023-06-30	00070	4775316231	728243	0.000152502
000063	2023-07-31	00070	4783189023	728243	0.000152251
000063	2023-08-31	00070	4783243952	728243	0.000152249
000063	2023-09-30	00070	4783248652	728243	0.000152249
000063	2023-10-31	00070	4783251552	728243	0.000152249
000063	2024-06-30	00005	4783251552	658643	0.000137698
000063	2024-08-31	00070	4783251652	658643	0.000137698
000065	2005-11-11	07000	162437120	63365	0.000390089
000065	2007-03-30	00009	162437120	63365	0.000390089
000065	2007-12-19	00009	162437120	48649	0.000299494
000065	2008-11-13	00009	162437120	48649	0.000299494
000066	2006-05-15	07000	458491500	279332	0.000609241
000066	2006-12-31	00005	458491500	182688	0.000398454
000066	2008-06-20	00005	458491500	92802	0.000202407
000066	2008-06-27	03000	550189800	111362	0.000202407
000066	2009-05-22	00009	550189800	111362	0.000202407
000066	2010-05-27	03000	1100379600	222724	0.000202407
000066	2010-11-05	00068	1323593886	273096	0.000206329
000066	2012-12-31	00005	1323593886	87560	6.61532e-05
000066	2013-06-30	00005	1323593886	23760	1.79511e-05
000066	2013-11-18	05000	1323593886	23760	1.79511e-05
000066	2017-01-18	00600	2825759475	23760	8.40836e-06
000066	2017-01-23	00060	2944069459	23760	8.07046e-06
000066	2018-08-07	00005	2944069459	334260	0.000113537
000066	2018-08-08	06000	2936165560	334260	0.000113842
000066	2019-08-19	00005	2936165560	349260	0.000118951
000066	2019-08-20	06000	2928182053	349260	0.000119275
000066	2019-12-31	00005	2928182053	334260	0.000114153
000066	2020-06-30	00005	2928182053	409930	0.000139995
000066	2020-08-04	00005	2928182053	370510	0.000126532
000066	2020-08-07	05000	2928182053	370510	0.000126532
000066	2020-12-31	00005	2928182053	348510	0.000119019
000066	2021-06-30	00070	2938359515	417260	0.000142004
000066	2022-01-24	00070	2940195936	209250	7.11687e-05
000066	2022-01-25	00060	3225799087	209250	6.48676e-05
000066	2022-08-15	05000	3225799087	209250	6.48676e-05
000066	2023-06-30	00070	3225799088	209250	6.48676e-05
000068	2008-01-14	07000	896671464	13690	1.52676e-05
000068	2009-03-03	00008	896671464	15515	1.73029e-05
000068	2009-03-04	00009	896671464	15515	1.73029e-05
000068	2009-06-30	00008	896671464	6160	6.86985e-06
000068	2009-09-22	00009	896671464	6160	6.86985e-06
000068	2010-03-22	00005	896671464	4620	5.15239e-06
000068	2010-03-23	00009	896671464	4620	5.15239e-06
000068	2011-02-16	00009	896671464	4620	5.15239e-06
000068	2011-06-30	00005	896671464	3465	3.86429e-06
000068	2018-01-22	00005	1006671464	900	8.94035e-07
000068	2018-01-23	05000	1006671464	900	8.94035e-07
000069	2006-12-31	00008	1111205242	212823	0.000191524
000069	2007-10-09	00070	1161205242	50212823	0.043242
000069	2007-11-16	00008	1161205242	50128078	0.043169
000069	2007-11-23	90000	1310544063	50178774	0.0382885
000069	2008-04-03	00008	1310544063	50000000	0.0381521
000069	2008-04-10	03000	2621088126	100000000	0.0381521
000069	2013-12-31	00005	7271498566	20803473	0.00286096
000069	2014-05-20	06000	7271342722	20803473	0.00286102
000069	2014-06-30	00008	7271342722	20803473	0.00286102
000069	2015-11-09	00070	7353992722	23053473	0.00313482
000069	2016-01-04	00008	7353992722	15556468	0.00211538
000069	2016-01-05	00060	8205681415	15556468	0.00189582
000069	2016-02-03	00005	8205681415	15218968	0.00185469
000069	2016-02-04	00008	8205681415	15218968	0.00185469
000069	2016-06-30	00005	8205681415	12579948	0.00153308
000069	2016-12-31	00005	8205681415	10254437	0.00124968
000069	2017-06-30	00005	8205681415	10177263	0.00124027
000069	2017-10-30	00008	8205681415	9502263	0.00115801
000069	2018-01-28	00005	8205681415	6721713	0.000819154
000069	2018-01-29	06000	8204081415	6721713	0.000819313
000069	2018-06-30	00005	8204081415	9790780	0.0011934
000069	2019-01-04	00005	8204081415	8139613	0.000992142
000069	2019-01-07	05000	8204081415	8139613	0.000992142
000069	2019-04-16	00008	8204081415	7689613	0.000937291
000069	2019-08-09	00005	8204081415	8175194	0.000996479
000069	2019-08-12	06000	8202506415	7837694	0.000955524
000069	2019-10-25	00005	8202506415	7730194	0.000942419
000069	2020-01-22	00005	8202506415	7745194	0.000944247
000069	2020-01-23	00008	8202506415	7295194	0.000889386
000069	2020-03-19	00005	8202506415	8357694	0.00101892
000069	2020-07-07	00005	8202506415	6631962	0.000808529
000069	2020-07-08	06000	8201793915	6631962	0.000808599
000069	2020-11-19	00005	8201793915	6194462	0.000755257
000069	2020-11-26	00008	8201793915	5744462	0.000700391
000069	2020-12-31	00005	8201793915	6194462	0.000755257
000069	2021-06-30	00005	8201793915	6827358	0.000832423
000069	2021-12-31	00005	8201793915	6937983	0.00084591
000069	2022-06-30	00005	8201793915	6089009	0.0007424
000069	2022-12-31	00005	8201793915	6104009	0.000744229
000069	2023-06-30	00005	8201793915	6036684	0.00073602
000069	2023-12-31	00005	8201793915	2846240	0.000347027
000069	2024-03-18	06000	8037758053	2846240	0.000354109
000069	2024-06-30	00005	8037758053	3843334	0.00047816
000078	2006-04-13	07000	475008000	1027423	0.00216296
000078	2007-04-16	00009	475008000	1236270	0.00260263
000078	2007-06-19	03000	617510400	1607151	0.00260263
000078	2007-12-31	00005	617510400	1189433	0.00192617
000078	2008-06-04	01000	652510400	1189433	0.00182286
000078	2008-12-31	00005	652510385	940000	0.00144059
000078	2009-06-30	00005	652510385	948550	0.00145369
000078	2010-05-06	00005	652510385	945902	0.00144964
000078	2010-05-07	00009	652510385	945902	0.00144964
000078	2013-03-28	00060	731713855	945902	0.00129272
000078	2014-03-31	05000	731713855	945902	0.00129272
000078	2015-06-24	00070	752513855	9275902	0.0123266
000078	2015-12-31	00005	752513855	10173877	0.0135199
000078	2016-05-20	00005	752513855	9906206	0.0131642
000078	2016-05-27	01000	1881284637	24765515	0.0131642
000078	2016-06-22	00060	2646590757	24765515	0.00935752
000078	2016-07-05	00008	2646590757	22090515	0.00834678
000078	2016-07-15	00005	2646590757	22847110	0.00863266
000078	2016-07-18	00070	2649340757	22847110	0.0086237
000078	2016-11-08	00005	2649340757	18447450	0.00696303
000078	2016-11-09	06000	2648210757	18447450	0.00696601
000078	2017-06-12	00008	2648210757	17644950	0.00666297
000078	2017-06-19	00005	2648210757	18447450	0.00696601
000078	2017-06-21	00008	2648210757	18447450	0.00696601
000078	2017-08-23	06000	2646613257	18447450	0.00697021
000078	2017-12-05	00008	2646613257	18447450	0.00697021
000078	2017-12-31	00008	2646613257	18447450	0.00697021
000078	2018-12-31	00005	2646613257	18447449	0.00697021
000078	2019-02-11	06000	2631123257	9162450	0.00348233
000078	2019-02-21	00070	2762583257	14162450	0.00512652
000078	2019-06-25	05000	2762583257	14162450	0.00512652
000078	2019-12-31	00005	2762583257	14176214	0.00513151
000078	2020-04-28	00005	2762583257	14978694	0.00542199
000078	2020-06-30	00005	2762583257	14923714	0.00540209
000078	2020-11-03	06000	2750833257	14923714	0.00542516
000078	2022-12-31	00005	2750833257	16548412	0.00601578
000078	2023-06-30	00005	2750833257	10049619	0.0036533
000078	2024-08-20	00005	2750833257	9682119	0.0035197
000078	2024-08-21	06000	2631123257	4682119	0.00177951
000088	2006-03-17	07000	1245000000	334050	0.000268313
000088	2006-12-31	00005	1245000000	284050	0.000228153
000088	2007-06-30	00005	1245000000	278850	0.000223976
000088	2007-12-31	00005	1245000000	213036	0.000171113
000088	2008-12-31	00005	1245000000	218533	0.000175529
000088	2009-06-30	00008	1245000000	147846	0.000118752
000088	2009-12-31	00005	1245000000	92596	7.43743e-05
000088	2011-06-03	00009	1245000000	92596	7.43743e-05
000088	2011-06-10	03000	1494000000	111115	7.43742e-05
000088	2012-04-14	00005	1494000000	129641	8.67744e-05
000088	2012-04-23	03000	1942200000	168533	8.67743e-05
000088	2012-12-31	00005	1942200000	72203	3.71759e-05
000088	2015-06-30	00005	1942200000	54203	2.7908e-05
000088	2016-06-30	00005	1942200000	72271	3.72109e-05
000088	2022-12-31	00005	2249161747	26274	1.16817e-05
000088	2023-12-29	00060	4285724351	26274	6.13059e-06
000089	1999-09-01	01000	450000000	147750	0.000328333
000089	2005-12-16	07000	799824000	255951	0.000320009
000089	2006-06-06	03000	1439683200	460712	0.000320009
000089	2006-12-31	00005	1439683200	303948	0.000211121
000089	2007-12-31	00005	1439683200	153715	0.00010677
000089	2008-01-28	00005	1439683200	139018	9.65615e-05
000089	2008-01-29	00060	1690243200	139018	8.22473e-05
000089	2008-12-31	00005	1690243200	58786	3.47796e-05
000089	2011-12-16	00009	1690243200	58786	3.47796e-05
000089	2012-01-06	05000	1690243200	58786	3.47796e-05
000089	2012-06-30	40000	1690254380	58786	3.47794e-05
000089	2013-06-30	40000	1690257716	58786	3.47793e-05
000089	2013-12-31	40000	1691786493	58786	3.47479e-05
000089	2014-06-30	40000	1691787662	94928	5.61111e-05
000089	2014-12-31	40000	1691791540	94928	5.61109e-05
000089	2015-03-31	40000	1691822108	94928	5.61099e-05
000089	2015-05-25	40000	1994127800	94928	4.76038e-05
000089	2015-05-28	40000	2050769509	94928	4.6289e-05
000089	2021-12-31	00005	2050769509	27106	1.32175e-05
000090	2009-06-11	03000	456637020	122056	0.000267293
000090	2010-06-30	00005	456637020	3869	8.47281e-06
000090	2011-01-05	05000	456637020	3869	8.47281e-06
000090	2012-06-28	03000	502300722	4256	8.47301e-06
000090	2013-06-28	03000	552530794	4681	8.47193e-06
000090	2013-12-31	00005	552530794	6242	1.12971e-05
000090	2015-12-10	00005	552530794	750	1.35739e-06
000090	2015-12-11	00060	855561097	750	8.76618e-07
000090	2016-06-17	01000	1197785535	1050	8.76618e-07
000090	2018-06-29	01000	1437342642	1260	8.76618e-07
000090	2018-06-30	00005	1437342642	91260	6.34922e-05
000090	2018-12-12	00005	1437342642	91680	6.37844e-05
000090	2018-12-14	05000	1437342642	91680	6.37844e-05
000090	2019-06-14	00005	1437342642	99810	6.94406e-05
000090	2019-06-20	01000	1868545434	129753	6.94406e-05
000090	2020-06-30	00005	1868545434	250345	0.000133979
000090	2020-09-03	00008	1868545434	250345	0.000133979
000090	2020-12-31	00005	1868545434	257845	0.000137992
000090	2021-06-30	00005	1868545434	380162	0.000203453
000090	2021-12-31	00005	1868545434	199342	0.000106683
000090	2022-12-31	00005	1868545434	239540	0.000128196
000090	2023-06-30	00005	1868545434	85500	4.57575e-05
000096	2003-11-20	03000	528000000	48000	9.09091e-05
000096	2006-02-06	07000	528000000	65280	0.000123636
000096	2007-12-31	00005	528000000	48960	9.27273e-05
000096	2008-07-01	60000	528000000	48960	9.27273e-05
000096	2008-12-08	00009	528000000	58752	0.000111273
000096	2009-09-29	60000	528000000	58752	0.000111273
000096	2009-12-16	00009	528000000	58752	0.000111273
000096	2010-06-30	00005	528000000	78336	0.000148364
000100	2006-04-18	60005	2586331144	64542	2.4955e-05
000100	2009-04-20	00005	2586331144	88953735	0.0343938
000100	2009-04-21	00060	2936931144	88953735	0.030288
000100	2009-05-05	00009	2936931144	88953735	0.030288
000100	2010-04-30	05000	2936931144	72354598	0.0246361
000100	2010-07-29	00060	4238109417	72354598	0.0170724
000100	2011-05-13	00005	4238109417	53998498	0.0127412
000100	2011-05-19	03000	8476218834	107996996	0.0127412
000100	2011-08-01	00005	8476218834	108004796	0.0127421
000100	2011-08-03	05000	8476218834	108004796	0.0127421
000100	2011-12-31	00005	8476218834	85595116	0.0100983
000100	2012-04-28	00005	8476218834	80894531	0.0095437
000100	2012-05-02	05000	8476218834	207094531	0.0244324
000100	2012-06-30	00005	8476218834	219147556	0.0258544
000100	2012-12-31	00005	8476218834	233354506	0.0275305
000100	2013-06-30	00070	8499928035	251473931	0.0295854
000100	2013-08-02	00005	8500016835	251473931	0.0295851
000100	2013-08-05	05000	8500016835	395982731	0.0465861
000100	2013-12-31	00070	8531495974	397959596	0.0466459
000100	2014-04-28	00070	8535088914	397293802	0.0465483
000100	2014-04-29	00060	9452413271	521847190	0.0552078
000100	2014-06-30	00005	9452413271	523459690	0.0553784
000100	2014-12-31	00005	9452413271	524656840	0.0555051
000100	2015-02-06	00070	9475135271	506620510	0.0534684
000100	2015-02-25	00060	12202723782	506620510	0.041517
000100	2015-05-05	00008	12202723782	497575732	0.0407758
000100	2015-05-07	05000	12202723782	497575732	0.0407758
000100	2015-06-30	00070	12224549262	501544867	0.0410277
000100	2015-07-28	06000	12216090862	501544867	0.0410561
000100	2015-08-25	06000	12213981262	501544867	0.0410632
000100	2015-12-31	00070	12228359702	503441732	0.04117
000100	2016-02-01	06000	12213681742	492316785	0.0403086
000100	2016-06-30	00005	12213681742	484736527	0.039688
000100	2017-12-15	00060	13514972063	484736527	0.0358666
000100	2018-02-26	05000	13514972063	484736527	0.0358666
000100	2018-05-15	00005	13514972063	485751227	0.0359417
000100	2018-05-16	00070	13549648507	485751227	0.0358497
000100	2018-07-26	00008	13549648507	485751227	0.0358497
000100	2018-12-28	00005	13549648507	489686526	0.0361402
000100	2019-01-04	05000	13549648507	489686526	0.0361402
000100	2019-05-30	00005	13549648507	575188472	0.0424504
000100	2019-05-31	00008	13549648507	575188472	0.0424504
000100	2019-06-25	00005	13549648507	581874176	0.0429439
000100	2019-06-26	00070	13549648507	581874176	0.0429439
000100	2019-06-30	00005	13549648507	616513472	0.0455003
000100	2019-10-28	00005	13549648507	492496617	0.0363476
000100	2019-10-29	06000	13528438719	492496617	0.0364045
000100	2019-12-31	00005	13528438719	615667627	0.0455091
000100	2020-03-31	00005	13528438719	614578263	0.0454286
000100	2020-07-23	00005	13528438719	616381082	0.0455619
000100	2020-07-24	06000	13519279411	616381082	0.0455927
000100	2020-11-05	00060	14030788362	616381082	0.0439306
000100	2021-01-08	00005	14030788362	620131082	0.0441979
000100	2021-01-11	05000	14030788362	620131082	0.0441979
000100	2021-06-21	00005	14030788362	611918960	0.0436126
000100	2021-06-28	00008	14030788362	611918960	0.0436126
000100	2021-09-09	00005	14030788362	612110488	0.0436262
000100	2021-09-10	06000	14030642421	612110488	0.0436267
000100	2021-09-27	00008	14030642421	612110488	0.0436267
000100	2021-09-30	00008	14030642421	612110488	0.0436267
000100	2021-11-11	05000	14030642421	612110488	0.0436267
000100	2022-03-15	00005	14030642421	611718990	0.0435988
000100	2022-06-30	00005	14030642421	613555490	0.0437297
000100	2022-11-30	40000	14265763123	613555490	0.0430089
000100	2022-12-14	00060	17071891607	613555490	0.0359395
000100	2022-12-31	00005	17071891607	614092483	0.035971
000100	2023-05-08	01000	18779080767	675501731	0.035971
000100	2023-06-19	00005	18779080767	677772034	0.0360919
000100	2023-06-26	05000	18779080767	677772034	0.0360919
000100	2023-06-30	00005	18779080767	680539213	0.0362392
000100	2024-05-31	00005	18779080767	677933209	0.0361004
000100	2024-06-30	00005	18779080767	680952296	0.0362612
000153	2006-01-13	07000	260009200	8100	3.11527e-05
000153	2007-01-18	00009	260009200	8100	3.11527e-05
000153	2007-12-31	00005	260009200	6075	2.33646e-05
000153	2008-01-17	00009	260009200	6075	2.33646e-05
000153	2017-11-28	00070	317077630	1321400	0.00416743
000153	2022-10-12	00070	332111230	5190000	0.0156273
000153	2023-10-18	00008	332111230	3892500	0.0117205
000153	2023-12-27	06000	332026230	3892500	0.0117235
000153	2024-06-07	01000	464836722	5449500	0.0117235
000153	2024-10-18	00008	464836722	3633000	0.00781565
000155	2023-12-31	00005	1475926818	3000	2.03262e-06
000155	2024-04-11	00060	1628568967	3000	1.84211e-06
000155	2024-06-30	00005	1846168342	3825	2.07186e-06
000157	2008-12-31	00008	1521000000	780882	0.0005134
000157	2009-04-14	00005	1521000000	585662	0.000385051
000157	2009-04-15	00008	1521000000	585662	0.000385051
000157	2009-05-20	60000	1521000000	585662	0.000385051
000157	2009-07-03	00008	1521000000	585662	0.000385051
000157	2009-07-10	03000	1673100000	644227	0.00038505
000157	2010-02-05	00060	1971054705	644227	0.000326844
000157	2010-04-15	00009	1971054705	644227	0.000326844
000157	2010-08-23	00005	1971054705	665301	0.000337536
000157	2010-08-27	03000	4927636762	1663252	0.000337535
000157	2010-12-23	10000	5797219562	1663252	0.000286905
000157	2011-01-13	00050	5927656962	1663252	0.000280592
000157	2011-02-09	00008	5927656962	1433957	0.00024191
000157	2011-02-14	05000	5927656962	1433957	0.00024191
000157	2011-07-15	03000	7705954050	1864144	0.00024191
000157	2013-06-30	00005	7705954050	14436046	0.00187336
000157	2014-06-30	00005	7705954050	14753446	0.00191455
000157	2014-12-31	00005	7705954050	14930171	0.00193749
000157	2015-06-30	00005	7705954050	14032047	0.00182094
000157	2015-12-31	06000	7664132250	11431419	0.00149155
000157	2016-06-30	00005	7664132250	10356692	0.00135132
000157	2016-12-31	00005	7664132250	11819767	0.00154222
000157	2017-06-30	00005	7664132250	11645303	0.00151945
000157	2017-07-07	06000	7625287164	11645303	0.0015272
000157	2017-12-28	00070	7794048075	44008765	0.00564646
000157	2017-12-31	00005	7794048075	43646479	0.00559998
000157	2018-06-30	00005	7794048075	43646483	0.00559998
000157	2018-09-21	06000	7792023575	43646483	0.00560143
000157	2018-11-09	00070	7810578433	43646483	0.00558812
000157	2018-11-29	06000	7808536633	43646483	0.00558959
000157	2018-12-07	00008	7808536633	40410141	0.00517512
000157	2018-12-31	00005	7808536633	34468759	0.00441424
000157	2019-07-18	00070	7808999070	39444979	0.00505122
000157	2019-07-19	06000	7804240446	39444979	0.0050543
000157	2019-09-11	00070	7844572191	50038839	0.00637878
000157	2019-10-31	06000	7844393011	50038839	0.00637893
000157	2019-11-08	00070	7867313670	1424844720	0.181109
000157	2019-11-15	00070	7868536630	45467522	0.0057784
000157	2019-11-18	00008	7868536630	45467522	0.0057784
000157	2020-01-07	06000	7866528115	45467522	0.00577987
000157	2020-01-15	00070	7873274641	31093925	0.0039493
000157	2020-01-16	00008	7873274641	25695837	0.00326368
000157	2020-06-30	00070	7898778232	31017050	0.00392682
000157	2020-09-18	00070	7916143550	35875328	0.00453192
000157	2020-11-09	00070	7919356053	35577973	0.00449253
000157	2020-11-10	06000	7919058698	35577973	0.0044927
000157	2020-12-03	00008	7919058698	35577973	0.0044927
000157	2020-12-11	00070	7922920002	35875328	0.00452804
000157	2020-12-14	06000	7921993497	35875328	0.00452857
000157	2020-12-17	00070	7922336527	35875328	0.00452838
000157	2020-12-23	00070	7922511972	35875328	0.00452828
000157	2020-12-29	00008	7922511972	24014571	0.00303118
000157	2020-12-31	00070	7937690533	34270940	0.0043175
000157	2021-02-02	00070	7948469018	24014571	0.00302128
000157	2021-02-03	00060	8142226480	24014571	0.00294939
000157	2021-02-04	00070	8143773907	29918505	0.00367379
000157	2021-02-05	00060	8654983346	29918505	0.0034568
000157	2021-06-30	00070	8674082537	29918505	0.00344918
000157	2021-08-05	00070	8675031447	29918505	0.00344881
000157	2021-08-10	05000	8675031447	29918505	0.00344881
000157	2021-12-31	00070	8677992236	29918505	0.00344763
000157	2022-07-21	00005	8677992236	27300705	0.00314597
000157	2023-06-30	00005	8677992236	29935066	0.00344954
000157	2023-12-31	00005	8677992236	25517625	0.0029405
000158	2006-01-13	07000	430000000	1890	4.39535e-06
000158	2008-01-28	00060	502700000	1417	2.81878e-06
000158	2008-05-16	03000	718861000	2026	2.81835e-06
000158	2009-01-15	00008	718861000	2702	3.75872e-06
000158	2009-01-16	00009	718861000	2702	3.75872e-06
000158	2009-02-03	05000	718861000	2702	3.75872e-06
000158	2017-06-02	00005	1271442278	9125	7.17689e-06
000158	2017-06-06	05000	1271442278	9125	7.17689e-06
000158	2017-06-30	00005	1271442278	27017444	0.0212494
000158	2017-07-19	01000	1652874961	35122677	0.0212494
000158	2017-12-31	00005	1652874961	35095407	0.0212329
000158	2018-07-09	00005	1652874961	35089167	0.0212292
000158	2018-07-12	05000	1652874961	25592665	0.0154837
000158	2018-07-30	05000	1652874961	25592665	0.0154837
000158	2018-12-31	00005	1652874961	25618892	0.0154996
000158	2019-06-30	00005	1652874961	25548932	0.0154573
000158	2019-11-29	00005	1652874961	25611082	0.0154949
000158	2019-12-11	06000	1598616721	25611082	0.0160208
000158	2020-06-30	00005	1598616721	22037357	0.0137853
000158	2021-06-30	00005	1598616721	18480354	0.0115602
000158	2021-12-31	00005	1598616721	18472458	0.0115553
000158	2022-06-30	00005	1598616721	14295368	0.00894234
000158	2023-06-30	00005	1598616721	11255773	0.00704095
000158	2023-12-31	00005	1598616721	11237912	0.00702977
000158	2024-06-30	00005	1598616721	7702462	0.0048182
000301	2020-09-01	00005	4834863866	35500	7.3425e-06
000301	2020-09-03	05000	4834863866	35500	7.3425e-06
000301	2020-11-09	00008	4834863866	35500	7.3425e-06
000301	2022-12-31	40000	6611189232	3750	5.6722e-07
000301	2023-01-20	05000	6611189232	3750	5.6722e-07
000301	2023-03-16	00008	6611189232	3750	5.6722e-07
000301	2023-03-30	00008	6611189232	3750	5.6722e-07
000301	2023-03-31	40000	6611212402	2850	4.31086e-07
000301	2023-06-30	40000	6611212627	2681172	0.000405549
000301	2023-09-28	40000	6611213077	2674572	0.000404551
000301	2023-12-29	40000	6611213678	2674572	0.000404551
000301	2024-03-29	40000	6611214278	2674572	0.000404551
000301	2024-06-28	40000	6611214676	2674572	0.000404551
000301	2024-09-30	40000	6611215733	2674572	0.000404551
000333	2013-09-18	10000	1686323389	160002413	0.0948824
000333	2014-04-16	00005	1686323389	160002913	0.0948827
000333	2014-04-18	05000	1686323389	160002913	0.0948827
000333	2014-04-30	01000	4215808472	400007282	0.0948827
000333	2014-06-30	00005	4215808472	404844959	0.0960302
000333	2014-09-15	00005	4215808472	406043129	0.0963144
000333	2014-09-18	05000	4215808472	406037097	0.096313
000333	2014-12-31	00005	4215808472	401822529	0.0953133
000333	2015-06-24	00070	4235122597	400093750	0.0944704
000333	2015-06-25	00060	4290122597	400093750	0.0932593
000333	2015-07-30	00070	4295306148	400093750	0.0931467
000333	2015-08-06	06000	4265714504	400093750	0.0937929
000333	2015-12-31	00070	4266839449	400093750	0.0937682
000333	2016-04-29	00070	4267391228	400093750	0.0937561
000333	2016-05-06	01000	6401086842	600140625	0.0937561
000333	2016-06-30	00070	6424934259	596867760	0.0928987
000333	2016-09-19	05000	6424934259	229492350	0.035719
000333	2016-12-31	00070	6458766808	196545260	0.0304308
000333	2017-05-19	00008	6458766808	196545260	0.0304308
000333	2017-06-15	00070	6466480018	102918765	0.0159157
000333	2017-06-16	00070	6489610018	103428765	0.0159376
000333	2017-06-30	00070	6519637198	73682835	0.0113017
000333	2017-12-31	00070	6561053319	74029285	0.0112831
000333	2018-01-24	00070	6570062196	73949285	0.0112555
000333	2018-02-07	00070	6575447196	74099285	0.0112691
000333	2018-05-16	00008	6575447196	74099285	0.0112691
000333	2018-05-30	00008	6589715683	74129510	0.0112493
000333	2018-05-31	00008	6589715683	74002010	0.0112299
000333	2018-06-20	00070	6594149247	74053010	0.0112301
000333	2018-06-21	00070	6614719247	74353010	0.0112405
000333	2018-06-27	00070	6624185795	74353010	0.0112245
000333	2018-06-29	05000	6624185795	74353010	0.0112245
000333	2018-07-27	00070	6628613347	74353010	0.011217
000333	2018-07-30	06000	6626911513	74353010	0.0112199
000333	2019-01-09	00070	6663030506	74906135	0.0112421
000333	2019-01-10	06000	6567925491	74906135	0.0114048
000333	2019-02-15	00070	6578675492	74773360	0.011366
000333	2019-02-20	00008	6578675492	74735860	0.0113603
000333	2019-02-28	00070	6595764492	74830860	0.0113453
000333	2019-04-03	06000	6591751075	74830860	0.0113522
000333	2019-04-23	00070	6603422687	73890960	0.0111898
000333	2019-05-10	00070	6605842687	73890960	0.0111857
000333	2019-06-19	00070	6608665050	73890960	0.0111809
000333	2019-06-21	00600	6932322526	73890960	0.0106589
000333	2019-06-27	00005	6932322526	73906736	0.0106612
000333	2019-06-28	00008	6932322526	73726736	0.0106352
000333	2019-07-09	00070	6937155282	79252569	0.0114244
000333	2019-07-10	00070	6937155282	79372569	0.0114417
000333	2019-07-22	00070	6941722285	45344138	0.00653212
000333	2019-07-23	06000	6938903035	45344138	0.00653477
000333	2019-12-31	00070	6971899574	73656538	0.0105648
000333	2020-01-09	00070	6976650332	73552781	0.0105427
000333	2020-02-11	00070	6986992499	73597781	0.0105335
000333	2020-02-19	00008	6986992499	73560281	0.0105282
000333	2020-02-20	00070	6988952498	73597781	0.0105306
000333	2020-03-10	06000	6985445998	73597781	0.0105359
000333	2020-06-04	00070	6999467315	73684031	0.0105271
000333	2020-06-17	00070	7001732717	73684031	0.0105237
000333	2020-06-22	00008	7001732717	73504031	0.010498
000333	2020-06-29	00070	7006778320	73784031	0.0105304
000333	2020-07-01	00008	7009745930	73784031	0.0105259
000333	2020-07-10	00070	7018717307	73784031	0.0105125
000333	2020-07-14	00070	7018717307	73904031	0.0105296
000333	2020-07-17	00008	7018717307	73904031	0.0105296
000333	2020-07-30	00070	7024014379	73904031	0.0105216
000333	2020-07-31	06000	7021795879	73904031	0.0105249
000333	2020-12-31	00070	7029975999	73919031	0.0105148
000333	2021-01-04	00070	7030113759	58731531	0.00835428
000333	2021-02-03	00070	7039450590	58731531	0.0083432
000333	2021-02-08	00008	7039450590	58694031	0.00833787
000333	2021-02-22	00070	7041435667	58731531	0.00834085
000333	2021-05-10	00070	7047686070	58851531	0.00835048
000333	2021-05-24	06000	7045159320	58851531	0.00835347
000333	2021-06-04	00008	7045159320	58851531	0.00835347
000333	2021-06-25	00070	7047771468	59000281	0.00837148
000333	2021-06-30	00008	7048148178	59025281	0.00837458
000333	2021-07-07	00070	7048895741	59025281	0.00837369
000333	2021-07-13	00008	7048895741	58995281	0.00836944
000333	2021-07-15	00070	7050973554	58995281	0.00836697
000333	2021-07-16	00070	7050973554	59275281	0.00840668
000333	2021-07-20	00008	7050973554	59231281	0.00840044
000333	2021-08-04	00008	7050973554	59231281	0.00840044
000333	2021-08-13	00070	7053284814	59231281	0.00839769
000333	2021-08-25	06000	6981308571	59231281	0.00848427
000333	2021-11-29	00070	6986817172	59496281	0.00851551
000333	2021-11-30	06000	6983471099	59496281	0.00851959
000333	2021-12-27	00070	6985258568	59496281	0.00851741
000333	2021-12-31	00070	6986563844	59496281	0.00851581
000333	2022-03-11	00070	6994436540	59476281	0.00850337
000333	2022-04-20	00070	6999815234	58342231	0.00833482
000333	2022-04-21	06000	6997053441	58342231	0.00833811
000333	2022-06-22	00008	6997053441	58317231	0.00833454
000333	2022-06-28	00008	6997053441	58247231	0.00832454
000333	2022-06-30	00070	6997329041	58413540	0.00834798
000333	2022-07-06	00070	6997595841	58413540	0.00834766
000333	2022-07-11	00008	6997595841	58333540	0.00833623
000333	2022-07-12	00070	6997949002	58382540	0.00834281
000333	2022-07-13	00070	6997949002	58702540	0.00838853
000333	2022-07-14	00070	6998021902	58702540	0.00838845
000333	2022-07-19	00008	6998021902	58617540	0.0083763
000333	2022-10-23	00070	7000880049	58671540	0.00838059
000333	2022-10-24	06000	6995749087	58671540	0.00838674
000333	2022-12-17	00070	6996695896	58671540	0.00838561
000333	2022-12-31	00070	6997273076	58671540	0.00838492
000333	2023-04-17	00070	7024196673	59138954	0.00841932
000333	2023-04-18	06000	7021698756	59138954	0.00842231
000333	2023-06-21	00070	7022181291	59138954	0.00842174
000333	2023-07-03	00008	7022181291	58611540	0.00834663
000333	2023-07-07	00008	7022181291	58586540	0.00834307
000333	2023-07-13	00008	7022984951	76504126	0.0108934
000333	2023-07-14	00070	7022984951	76504126	0.0108934
000333	2023-07-18	00008	7022984951	76419126	0.0108813
000333	2023-11-09	00070	7031711304	58591540	0.00833247
000333	2023-11-10	06000	7024215000	58591540	0.00834136
000333	2023-12-01	00070	7024597408	58591540	0.00834091
000333	2023-12-31	00070	7025769025	58591990	0.00833958
000333	2024-01-12	00070	7027004021	58684061	0.00835122
000333	2024-02-06	00070	7031556841	58684061	0.00834581
000333	2024-02-07	06000	6961748977	58684061	0.0084295
000333	2024-03-08	00070	6969871538	91389685	0.0131121
000333	2024-03-12	05000	6969871538	91389685	0.0131121
000333	2024-03-25	06000	6968950724	91389685	0.0131138
000333	2024-06-14	00070	6980115778	91389685	0.0130929
000333	2024-06-24	00008	6980115778	91344685	0.0130864
000333	2024-06-30	00070	6980151778	91389685	0.0130928
000333	2024-07-03	00070	6980167587	91389685	0.0130928
000333	2024-07-11	00008	6980167587	91309685	0.0130813
000333	2024-07-17	00070	6982157274	91389685	0.013089
000333	2024-07-22	00008	6982157274	91309685	0.0130776
000333	2024-07-23	00070	6985274217	91389685	0.0130832
000333	2024-07-25	00008	6985274217	91299685	0.0130703
000333	2024-07-30	00008	6985274217	91299685	0.0130703
000333	2024-09-12	00070	6994689850	91299685	0.0130527
000333	2024-09-18	10000	7560645150	91299685	0.0120756
000338	2013-05-20	05000	1999309639	28080000	0.0140448
000338	2013-05-21	00008	1999309639	36672000	0.0183423
000338	2013-09-13	05000	1999309639	36672000	0.0183423
000338	2013-11-19	05000	1999309639	36672000	0.0183423
000338	2014-11-20	05000	1999309639	36672000	0.0183423
000338	2015-08-20	01000	3998619278	73344000	0.0183423
000338	2016-05-20	05000	3998619278	55008000	0.0137567
000338	2016-06-30	00005	3998619278	46378011	0.0115985
000338	2017-07-14	00005	3998619278	46371577	0.0115969
000338	2017-07-21	03000	7997238556	92743154	0.0115969
000338	2017-12-31	00005	7997238556	96335291	0.0120461
000338	2018-06-30	00005	7997238556	101368887	0.0126755
000338	2019-01-04	00005	7997238556	104463765	0.0130625
000338	2019-01-07	06000	7933873895	104463765	0.0131668
000338	2019-06-30	00005	7933873895	103267137	0.013016
000338	2019-12-31	00005	7933873895	103301262	0.0130203
000338	2020-06-30	00005	7933873895	103987062	0.0131067
000338	2021-05-20	00060	8726556821	103987062	0.0119162
000338	2021-06-30	00005	8726556821	106863355	0.0122458
000338	2021-11-30	00005	8726556821	103313328	0.011839
000338	2021-12-01	05000	8726556821	103313328	0.011839
000338	2021-12-31	00005	8726556821	90783297	0.0104031
000338	2022-05-20	00005	8726556821	91223297	0.0104535
000338	2022-06-30	00005	8726556821	92270676	0.0105735
000338	2022-12-31	00005	8726556821	92655675	0.0106177
000338	2023-06-30	00005	8726556821	91363588	0.0104696
000338	2023-12-19	00005	8726556821	94510193	0.0108302
000338	2023-12-20	00070	8726556821	100700193	0.0115395
000338	2023-12-31	00005	8726556821	97273627	0.0111469
000338	2024-06-30	00005	8726556821	99743054	0.0114298
000400	2013-02-07	00005	378272000	155953	0.000412277
000400	2013-02-08	00008	378272000	155953	0.000412277
000400	2013-05-14	03000	491753600	202739	0.000412278
000400	2013-11-29	00005	491753600	184475	0.000375137
000400	2013-12-02	00008	491753600	184475	0.000375137
000400	2014-03-17	00005	491753600	217366	0.000442022
000400	2014-03-18	00060	672218206	217366	0.000323356
000400	2014-06-11	00005	672218206	219284	0.00032621
000400	2014-06-17	03000	1008327309	328926	0.00032621
000400	2014-12-31	00005	1008327309	131581	0.000130494
000400	2015-06-18	00008	1008327309	131581	0.000130494
000400	2015-12-31	00005	1008327309	184353	0.000182831
000400	2016-06-30	00005	1008327309	197804	0.00019617
000400	2016-12-31	00005	1008327309	145253	0.000144053
000400	2017-04-07	00005	1008327309	184353	0.000182831
000400	2017-04-10	05000	1008327309	184353	0.000182831
000400	2017-06-30	00005	1008327309	140253	0.000139095
000400	2017-12-31	00005	1008327309	144878	0.000143682
000400	2018-06-30	00005	1008327309	164575	0.000163216
000400	2018-12-31	00005	1008327309	140255	0.000139097
000400	2019-06-30	00005	1008327309	147004	0.00014579
000400	2019-12-31	00005	1008327309	57169	5.66969e-05
000400	2020-12-31	00005	1008327309	57244	5.67712e-05
000400	2021-06-30	00005	1008327309	57469	5.69944e-05
000400	2021-12-31	00005	1008327309	70901	7.03155e-05
000400	2022-06-30	00005	1008327309	57469	5.69944e-05
000400	2023-07-14	00005	1008327309	21150	2.09753e-05
000400	2023-07-17	00070	1019009309	21150	2.07555e-05
000400	2023-12-31	00005	1019009309	5250	5.15206e-06
000400	2024-08-16	00005	1019009309	7000	6.86942e-06
000400	2024-08-19	06000	1018874309	7000	6.87033e-06
000401	2006-05-24	07000	962770614	164544	0.000170907
000401	2007-05-25	00009	962770614	175544	0.000182332
000401	2007-12-31	00008	962770614	131658	0.000136749
000401	2008-01-12	00005	962770614	116126	0.000120616
000401	2009-05-26	00005	1212770614	102429	8.44587e-05
000401	2009-05-27	00009	1212770614	102429	8.44587e-05
000401	2009-07-09	05000	1212770614	102429	8.44587e-05
000401	2010-02-11	00008	1212770614	80031	6.59902e-05
000401	2010-02-12	00009	1212770614	80031	6.59902e-05
000401	2010-08-13	00008	1212770614	80031	6.59902e-05
000401	2010-11-01	00009	1212770614	80031	6.59902e-05
000401	2011-12-31	00008	1212770614	80031	6.59902e-05
000401	2012-01-30	00060	1347522914	80031	5.93912e-05
000401	2012-06-30	00005	1347522914	89427	6.6364e-05
000401	2012-12-31	00008	1347522914	51843	3.84728e-05
000401	2013-06-30	00008	1347522914	51843	3.84728e-05
000401	2014-01-06	00008	1347522914	51843	3.84728e-05
000401	2014-01-09	00008	1347522914	51843	3.84728e-05
000401	2015-02-11	05000	1347522914	51843	3.84728e-05
000401	2015-06-30	00008	1347522914	51843	3.84728e-05
000401	2015-09-11	00008	1347522914	51843	3.84728e-05
000401	2015-09-14	00008	1347522914	51843	3.84728e-05
000401	2016-01-11	00008	1347522914	51843	3.84728e-05
000401	2016-01-12	00008	1347522914	51843	3.84728e-05
000401	2016-12-31	00005	1347522914	89812	6.66497e-05
000401	2017-06-30	00005	1347522914	21213	1.57422e-05
000401	2018-06-30	00005	1347522914	23488	1.74305e-05
000401	2018-12-31	00005	1347522914	22788	1.6911e-05
000401	2019-06-30	00005	1347522914	25713	1.90817e-05
000401	2019-12-31	00005	1347522914	26763	1.98609e-05
000401	2020-06-30	00005	1347522914	26238	1.94713e-05
000401	2020-12-31	00005	1347522914	33134	2.45888e-05
000401	2021-09-30	40000	1413651757	1350	9.54974e-07
000401	2021-12-15	40000	1413653151	1350	9.54973e-07
000401	2021-12-16	00600	2479641194	1350	5.44434e-07
000401	2021-12-31	40000	2479641329	1350	5.44434e-07
000401	2022-01-13	40000	2479641399	1350	5.44434e-07
000401	2022-01-14	00600	2658212827	1350	5.0786e-07
000401	2022-03-31	40000	2658213132	1350	5.0786e-07
000401	2022-06-30	40000	2658213420	1350	5.0786e-07
000401	2022-07-14	05000	2658213420	1350	5.0786e-07
000401	2022-09-30	40000	2658213570	1350	5.0786e-07
000401	2022-12-31	40000	2658213720	1350	5.0786e-07
000401	2023-03-31	40000	2658214254	1350	5.0786e-07
000401	2023-06-30	40000	2658214631	1350	5.0786e-07
000401	2023-12-29	40000	2658214707	1800	6.77146e-07
000401	2024-03-29	40000	2658214783	1800	6.77146e-07
000401	2024-06-28	00005	2658214783	1350	5.0786e-07
000402	2008-12-31	00005	2481212959	583500	0.000235167
000402	2009-04-07	00009	2481212959	583500	0.000235167
000402	2010-01-28	00005	2481212959	526500	0.000212195
000402	2010-01-29	05000	2481212959	526500	0.000212195
000402	2010-07-06	03000	3027079809	642330	0.000212195
000402	2011-06-30	00005	3027079809	635010	0.000209776
000402	2011-12-31	00005	3027079809	482600	0.000159428
000402	2012-06-30	00005	3027079809	506938	0.000167468
000402	2012-12-31	00005	3027079809	1626632	0.00053736
000402	2013-06-30	00005	3027079809	1707647	0.000564124
000402	2013-12-31	00005	3027079809	2686704	0.000887556
000402	2014-11-21	06000	2988929907	2686704	0.000898885
000402	2014-12-31	00005	2988929907	2946198	0.000985703
000402	2015-06-30	00005	2988929907	1932972	0.00064671
000402	2015-12-31	00005	2988929907	1969972	0.000659089
000402	2016-06-30	00005	2988929907	1964984	0.000657421
000402	2016-12-31	00005	2988929907	1314936	0.000439935
000402	2017-06-30	00005	2988929907	1544611	0.000516777
000402	2017-12-31	00005	2988929907	1135911	0.000380039
000402	2018-06-30	00005	2988929907	1094586	0.000366213
000402	2018-12-31	00005	2988929907	1364191	0.000456415
000402	2019-06-30	00005	2988929907	1298361	0.00043439
000402	2020-06-30	00005	2988929907	1293861	0.000432884
000402	2021-06-30	00005	2988929907	1106171	0.000370089
000402	2021-12-31	00005	2988929907	1100871	0.000368316
000402	2023-12-31	00005	2988929907	1231277	0.000411946
000402	2024-06-30	00005	2988929907	700005	0.000234199
000403	2009-12-31	00005	211683491	6198	2.92796e-05
000403	2010-12-31	00008	211683491	3750	1.77151e-05
000403	2013-02-08	07000	272577599	30000	0.00011006
000403	2013-12-31	00008	272577599	30000	0.00011006
000403	2014-01-29	00008	272577599	24000	8.80483e-05
000403	2014-02-10	00008	272577599	24000	8.80483e-05
000403	2014-04-02	00008	272577599	24000	8.80483e-05
000403	2014-04-03	00008	272577599	24000	8.80483e-05
000403	2014-08-05	00008	272577599	24000	8.80483e-05
000403	2014-08-06	00008	272577599	24000	8.80483e-05
000403	2015-04-28	00008	272577599	19500	7.15393e-05
000403	2015-04-30	00008	272577599	19500	7.15393e-05
000403	2016-01-28	00008	272577599	26000	9.53857e-05
000403	2016-02-01	00008	272577599	26000	9.53857e-05
000403	2017-07-06	00005	272577599	26925	9.87792e-05
000403	2017-07-07	00008	272577599	26925	9.87792e-05
000403	2017-11-13	00008	272577599	26925	9.87792e-05
000403	2017-11-14	00008	272577599	26925	9.87792e-05
000403	2018-03-06	00008	272577599	18325	6.72286e-05
000403	2018-12-31	00005	272577599	40312	0.000147892
000403	2019-01-22	05000	272577599	40312	0.000147892
000403	2019-03-14	00005	272577599	36684	0.000134582
000403	2019-03-15	00008	272577599	36684	0.000134582
000403	2019-06-30	00005	272577599	3900	1.43079e-05
000403	2020-06-12	00070	274372599	973900	0.00354955
000403	2020-07-27	01000	492434666	1747923	0.00354955
000403	2020-12-09	00005	492434666	7000	1.42151e-05
000403	2020-12-11	00008	492434666	7000	1.42151e-05
000403	2021-06-01	00005	732035361	9333	1.27494e-05
000403	2021-06-11	00070	732457131	134967	0.000184266
000403	2021-06-15	00008	732457131	46086	6.29197e-05
000403	2021-06-30	00070	732599351	86379	0.000117908
000403	2021-08-19	00070	732777597	128054	0.000174752
000403	2021-08-23	05000	732777597	128054	0.000174752
000403	2021-12-31	00070	732919234	297009	0.000405241
000403	2022-01-28	00005	732919234	304833	0.000415916
000403	2022-07-01	00005	732970308	82494	0.000112548
000403	2022-07-15	00008	732970308	82494	0.000112548
000403	2022-08-17	00005	732970308	1003874	0.0013696
000403	2022-08-18	06000	732360101	914155	0.00124823
000403	2022-12-31	00070	732386720	278515	0.000380284
000403	2023-02-08	00070	732433303	300943	0.000410881
000403	2023-05-23	00070	732642692	3176320	0.00433543
000403	2023-06-30	00070	732645729	3176320	0.00433541
000403	2023-07-10	00005	732645729	4683613	0.00639274
000403	2023-07-13	00008	732645729	4279791	0.00584156
000403	2023-12-29	00070	733000702	3592350	0.00490088
000403	2024-02-02	00005	733000702	1085057	0.00148029
000403	2024-02-05	06000	732744273	1174795	0.00160328
000403	2024-02-07	00008	732744273	984605	0.00134372
000403	2024-02-08	00005	732744273	790451	0.00107875
000403	2024-06-30	00070	733043291	6351263	0.00866424
000403	2024-09-25	00005	733043291	1653754	0.00225601
000404	1996-12-19	20000	140000000	43200	0.000308571
000404	1997-10-17	00100	152083845	56160	0.00036927
000404	2006-12-20	07000	324581218	37773	0.000116375
000404	2007-12-25	00005	324581218	28329	8.72786e-05
000404	2007-12-26	00009	324581218	28329	8.72786e-05
000404	2008-12-26	00005	324581218	12505	3.85266e-05
000404	2008-12-29	00009	324581218	12505	3.85266e-05
000404	2009-12-25	00009	324581218	12505	3.85266e-05
000404	2013-02-26	00060	559623953	12505	2.23454e-05
000404	2013-04-19	00008	559623953	12505	2.23454e-05
000404	2014-02-27	05000	559623953	12505	2.23454e-05
000404	2014-10-21	00008	559623953	420405	0.000751228
000404	2014-10-23	00008	559623953	598605	0.00106966
000404	2014-12-31	00005	559623953	799780	0.00142914
000404	2015-08-13	00008	559623953	809780	0.00144701
000404	2016-02-26	00005	559623953	1227955	0.00219425
000404	2016-03-02	05000	559623953	1227955	0.00219425
000404	2016-12-31	00005	559623953	1740805	0.00311067
000404	2017-06-30	00005	695995979	2627036	0.0037745
000404	2017-12-31	00005	695995979	3458905	0.00496972
000404	2018-06-30	00005	695995979	3047906	0.0043792
000404	2018-12-31	00005	695995979	1359199	0.00195288
000404	2019-06-30	00005	695995979	1373181	0.00197297
000404	2020-06-30	00005	695995979	1645219	0.00236383
000404	2020-12-31	00005	695995979	1373181	0.00197297
000404	2021-06-30	00005	695995979	1300215	0.00186814
000404	2021-12-31	00005	695995979	229207	0.000329322
000404	2022-12-31	00005	695995979	980307	0.0014085
000404	2023-06-30	00005	695995979	1459807	0.00209744
000404	2023-12-31	00005	695995979	2355507	0.00338437
000404	2024-06-30	00005	695995979	3006807	0.00432015
000406	1996-09-10	01000	93628500	4200	4.48581e-05
000406	1998-05-07	01000	168531300	7560	4.48581e-05
000407	2006-07-11	07000	356720904	147785	0.000414287
000407	2007-07-12	00009	356720904	110838	0.000310713
000407	2008-07-11	00008	356720904	25840022	0.0724376
000407	2008-07-14	00009	356720904	8003977	0.0224376
000407	2008-12-31	00005	356720904	8039649	0.0225376
000407	2009-05-21	00005	356720904	185163	0.00051907
000407	2009-05-27	03000	499409265	259228	0.000519069
000407	2009-07-15	00009	499409265	259228	0.000519069
000407	2009-12-31	00005	499409265	57761	0.000115659
000407	2010-12-31	00005	499409265	50939	0.000101999
000407	2011-04-28	00005	499409265	57761	0.000115659
000407	2011-05-06	03000	649232044	75089	0.000115658
[truncated: 80,217 more rows]
