# Supplementary material for: How corporate ESG performance enables New-qualitive Productive forces development based on Listed companies in the manufacturing industry: Evidence from China
Source: Research Square preprint supplement (doi:10.21203/rs.3.rs-6158355/v1), 2025-07-24
Supplement: Supplementary file 3 [file 187253f2ca86afa4c722948b.xlsx]

## Sheet: sheet1
Stkcd	Reptdt	Y1001b
证券代码	统计截止日期	董事长与总经理兼任情况
没有单位	没有单位	没有单位
000002	1999-12-31	0
000002	2000-12-31	0
000002	2001-12-31	0
000002	2002-12-31	0
000002	2003-12-31	0
000002	2004-12-31	0
000002	2005-12-31	0
000002	2006-12-31	0
000002	2007-12-31	0
000002	2008-12-31	0
000002	2009-12-31	0
000002	2010-12-31	0
000002	2011-12-31	0
000002	2012-12-31	0
000002	2013-12-31	0
000002	2014-12-31	0
000002	2015-12-31	0
000002	2016-12-31	0
000002	2017-12-31	1
000002	2018-12-31	0
000002	2019-12-31	0
000002	2020-12-31	0
000002	2021-12-31	0
000002	2022-12-31	0
000002	2023-12-31	0
000004	1999-12-31	0
000004	2000-12-31	0
000004	2001-12-31	0
000004	2002-12-31	0
000004	2003-12-31	0
000004	2004-12-31	0
000004	2005-12-31	0
000004	2006-12-31	1
000004	2007-12-31	1
000004	2008-12-31	0
000004	2009-12-31	0
000004	2010-12-31	0
000004	2011-12-31	0
000004	2012-12-31	0
000004	2013-12-31	0
000004	2014-12-31	0
000004	2015-12-31	1
000004	2016-12-31	1
000004	2017-12-31	1
000004	2018-12-31	1
000004	2019-12-31	1
000004	2020-12-31	1
000004	2021-12-31	1
000004	2022-12-31	1
000004	2023-12-31	1
000006	1999-12-31	0
000006	2000-12-31	0
000006	2001-12-31	0
000006	2002-12-31	0
000006	2003-12-31	0
000006	2004-12-31	0
000006	2005-12-31	1
000006	2006-12-31	0
000006	2007-12-31	0
000006	2008-12-31	0
000006	2009-12-31	0
000006	2010-12-31	0
000006	2011-12-31	0
000006	2012-12-31	0
000006	2013-12-31	0
000006	2014-12-31	0
000006	2015-12-31
000006	2016-12-31
000006	2017-12-31	0
000006	2018-12-31	0
000006	2019-12-31	0
000006	2020-12-31	0
000006	2021-12-31	0
000006	2022-12-31
000006	2023-12-31
000007	1999-12-31	0
000007	2000-12-31	0
000007	2001-12-31	0
000007	2002-12-31	0
000007	2003-12-31	0
000007	2004-12-31	0
000007	2005-12-31	0
000007	2006-12-31	0
000007	2007-12-31	0
000007	2008-12-31	0
000007	2009-12-31	0
000007	2010-12-31	0
000007	2011-12-31	0
000007	2012-12-31	0
000007	2013-12-31	0
000007	2014-12-31
000007	2015-12-31	0
000007	2016-12-31	0
000007	2017-12-31	0
000007	2018-12-31	0
000007	2019-12-31	0
000007	2020-12-31	0
000007	2021-12-31	0
000007	2022-12-31	0
000007	2023-12-31	0
000008	1999-12-31	0
000008	2000-12-31
000008	2001-12-31	0
000008	2002-12-31	0
000008	2003-12-31	0
000008	2004-12-31	0
000008	2005-12-31	0
000008	2006-12-31	0
000008	2007-12-31	0
000008	2008-12-31	0
000008	2009-12-31	0
000008	2010-12-31	0
000008	2011-12-31	0
000008	2012-12-31	0
000008	2013-12-31	0
000008	2014-12-31	0
000008	2015-12-31	0
000008	2016-12-31	0
000008	2017-12-31	0
000008	2018-12-31	0
000008	2019-12-31	0
000008	2020-12-31	0
000008	2021-12-31	1
000008	2022-12-31	1
000008	2023-12-31	1
000009	1999-12-31	1
000009	2000-12-31	1
000009	2001-12-31	1
000009	2002-12-31	1
000009	2003-12-31	1
000009	2004-12-31	1
000009	2005-12-31	1
000009	2006-12-31	1
000009	2007-12-31	1
000009	2008-12-31	1
000009	2009-12-31	1
000009	2010-12-31	1
000009	2011-12-31	1
000009	2012-12-31	1
000009	2013-12-31	1
000009	2014-12-31	1
000009	2015-12-31	1
000009	2016-12-31	1
000009	2017-12-31	1
000009	2018-12-31	1
000009	2019-12-31	1
000009	2020-12-31	1
000009	2021-12-31	1
000009	2022-12-31	1
000009	2023-12-31	1
000010	1999-12-31	0
000010	2000-12-31	0
000010	2001-12-31	0
000010	2002-12-31	1
000010	2003-12-31	1
000010	2004-12-31	1
000010	2005-12-31	0
000010	2006-12-31
000010	2007-12-31
000010	2008-12-31	1
000010	2009-12-31	1
000010	2010-12-31	1
000010	2011-12-31	1
000010	2012-12-31	0
000010	2013-12-31	0
000010	2014-12-31	0
000010	2015-12-31	0
000010	2016-12-31	0
000010	2017-12-31	0
000010	2018-12-31	0
000010	2019-12-31	0
000010	2020-12-31	0
000010	2021-12-31	0
000010	2022-12-31	0
000010	2023-12-31	0
000011	1999-12-31	0
000011	2000-12-31	0
000011	2001-12-31	0
000011	2002-12-31	0
000011	2003-12-31	0
000011	2004-12-31	0
000011	2005-12-31	0
000011	2006-12-31	0
000011	2007-12-31	0
000011	2008-12-31	0
000011	2009-12-31	0
000011	2010-12-31	0
000011	2011-12-31	0
000011	2012-12-31	0
000011	2013-12-31	0
000011	2014-12-31	0
000011	2015-12-31	0
000011	2016-12-31	0
000011	2017-12-31	0
000011	2018-12-31	0
000011	2019-12-31	0
000011	2020-12-31	0
000011	2021-12-31	0
000011	2022-12-31	0
000011	2023-12-31	0
000012	1999-12-31	0
000012	2000-12-31	0
000012	2001-12-31	0
000012	2002-12-31	0
000012	2003-12-31	0
000012	2004-12-31	0
000012	2005-12-31	0
000012	2006-12-31	0
000012	2007-12-31	1
000012	2008-12-31	1
000012	2009-12-31	1
000012	2010-12-31	1
000012	2011-12-31	1
000012	2012-12-31	1
000012	2013-12-31	1
000012	2014-12-31	0
000012	2015-12-31	0
000012	2016-12-31
000012	2017-12-31	0
000012	2018-12-31	0
000012	2019-12-31	0
000012	2020-12-31	0
000012	2021-12-31	0
000012	2022-12-31	0
000012	2023-12-31	0
000014	1999-12-31	0
000014	2000-12-31	0
000014	2001-12-31	0
000014	2002-12-31	0
000014	2003-12-31	0
000014	2004-12-31	0
000014	2005-12-31
000014	2006-12-31	0
000014	2007-12-31	0
000014	2008-12-31	0
000014	2009-12-31	0
000014	2010-12-31	0
000014	2011-12-31	0
000014	2012-12-31	0
000014	2013-12-31	0
000014	2014-12-31	0
000014	2015-12-31	0
000014	2016-12-31	0
000014	2017-12-31	0
000014	2018-12-31	0
000014	2019-12-31	0
000014	2020-12-31	0
000014	2021-12-31	0
000014	2022-12-31	0
000014	2023-12-31	0
000016	1999-12-31	0
000016	2000-12-31	0
000016	2001-12-31	0
000016	2002-12-31	0
000016	2003-12-31	0
000016	2004-12-31	0
000016	2005-12-31	1
000016	2006-12-31	1
000016	2007-12-31	1
000016	2008-12-31
000016	2009-12-31	0
000016	2010-12-31	0
000016	2011-12-31	0
000016	2012-12-31	0
000016	2013-12-31	0
000016	2014-12-31	0
000016	2015-12-31
000016	2016-12-31	1
000016	2017-12-31	0
000016	2018-12-31	1
000016	2019-12-31	1
000016	2020-12-31	1
000016	2021-12-31	1
000016	2022-12-31	0
000016	2023-12-31	0
000017	1999-12-31	0
000017	2000-12-31	0
000017	2001-12-31	0
000017	2002-12-31	0
000017	2003-12-31	0
000017	2004-12-31	0
000017	2005-12-31	0
000017	2006-12-31	0
000017	2007-12-31	0
000017	2008-12-31	0
000017	2009-12-31	0
000017	2010-12-31	0
000017	2011-12-31	0
000017	2012-12-31	0
000017	2013-12-31	0
000017	2014-12-31	0
000017	2015-12-31	1
000017	2016-12-31	1
000017	2017-12-31	1
000017	2018-12-31	1
000017	2019-12-31	1
000017	2020-12-31	1
000017	2021-12-31	1
000017	2022-12-31	0
000017	2023-12-31	0
000018	1999-12-31	0
000018	2000-12-31	0
000018	2001-12-31	0
000018	2002-12-31	0
000018	2003-12-31	0
000018	2004-12-31	0
000018	2005-12-31	0
000018	2006-12-31	0
000018	2007-12-31	0
000018	2008-12-31	1
000018	2009-12-31	1
000018	2010-12-31	1
000018	2011-12-31	1
000018	2012-12-31	1
000018	2013-12-31	1
000018	2014-12-31	1
000018	2015-12-31	1
000018	2016-12-31	1
000018	2017-12-31	0
000018	2018-12-31	0
000019	1999-12-31	0
000019	2000-12-31	0
000019	2001-12-31	0
000019	2002-12-31	1
000019	2003-12-31	1
000019	2004-12-31	1
000019	2005-12-31	0
000019	2006-12-31	0
000019	2007-12-31	0
000019	2008-12-31	0
000019	2009-12-31	0
000019	2010-12-31	0
000019	2011-12-31	0
000019	2012-12-31	0
000019	2013-12-31	0
000019	2014-12-31	0
000019	2015-12-31	0
000019	2016-12-31	0
000019	2017-12-31	0
000019	2018-12-31	0
000019	2019-12-31	0
000019	2020-12-31	0
000019	2021-12-31	0
000019	2022-12-31
000019	2023-12-31	0
000020	1999-12-31	0
000020	2000-12-31	0
000020	2001-12-31	0
000020	2002-12-31	0
000020	2003-12-31	0
000020	2004-12-31	0
000020	2005-12-31	0
000020	2006-12-31	0
000020	2007-12-31	1
000020	2008-12-31	1
000020	2009-12-31	1
000020	2010-12-31	1
000020	2011-12-31	1
000020	2012-12-31	1
000020	2013-12-31	1
000020	2014-12-31	1
000020	2015-12-31	1
000020	2016-12-31	1
000020	2017-12-31	1
000020	2018-12-31	1
000020	2019-12-31	1
000020	2020-12-31	1
000020	2021-12-31	1
000020	2022-12-31	1
000020	2023-12-31	1
000021	1999-12-31	0
000021	2000-12-31	0
000021	2001-12-31	0
000021	2002-12-31	0
000021	2003-12-31	0
000021	2004-12-31	0
000021	2005-12-31	0
000021	2006-12-31	0
000021	2007-12-31	0
000021	2008-12-31	1
000021	2009-12-31	1
000021	2010-12-31	0
000021	2011-12-31	0
000021	2012-12-31	0
000021	2013-12-31	0
000021	2014-12-31	0
000021	2015-12-31	0
000021	2016-12-31	0
000021	2017-12-31	0
000021	2018-12-31	0
000021	2019-12-31	0
000021	2020-12-31	0
000021	2021-12-31	0
000021	2022-12-31	0
000021	2023-12-31	0
000022	1999-12-31
000022	2000-12-31	0
000022	2001-12-31	0
000022	2002-12-31	0
000022	2003-12-31	0
000022	2004-12-31	0
000022	2005-12-31	0
000022	2006-12-31	0
000022	2007-12-31	0
000022	2008-12-31	0
000022	2009-12-31	0
000022	2010-12-31	1
000022	2011-12-31	0
000022	2012-12-31	0
000022	2013-12-31	0
000022	2014-12-31	0
000022	2015-12-31
000022	2016-12-31	0
000022	2017-12-31	0
000024	1999-12-31
000024	2000-12-31	0
000024	2001-12-31	0
000024	2002-12-31	0
000024	2003-12-31	0
000024	2004-12-31	0
000024	2005-12-31	0
000024	2006-12-31	0
000024	2007-12-31	0
000024	2008-12-31	0
000024	2009-12-31	0
000024	2010-12-31	0
000024	2011-12-31	0
000024	2012-12-31	0
000024	2013-12-31	0
000024	2014-12-31	0
000025	1999-12-31	0
000025	2000-12-31	0
000025	2001-12-31	0
000025	2002-12-31	0
000025	2003-12-31	0
000025	2004-12-31
000025	2005-12-31	1
000025	2006-12-31	0
000025	2007-12-31	0
000025	2008-12-31	0
000025	2009-12-31	0
000025	2010-12-31	0
000025	2011-12-31	0
000025	2012-12-31	0
000025	2013-12-31	0
000025	2014-12-31	0
000025	2015-12-31	0
000025	2016-12-31	0
000025	2017-12-31	0
000025	2018-12-31	0
000025	2019-12-31	0
000025	2020-12-31	0
000025	2021-12-31	0
000025	2022-12-31	0
000025	2023-12-31
000026	1999-12-31	0
000026	2000-12-31	0
000026	2001-12-31	0
000026	2002-12-31	0
000026	2003-12-31	0
000026	2004-12-31	0
000026	2005-12-31	0
000026	2006-12-31	0
000026	2007-12-31	0
000026	2008-12-31	0
000026	2009-12-31	0
000026	2010-12-31	0
000026	2011-12-31	0
000026	2012-12-31	0
000026	2013-12-31	0
000026	2014-12-31	0
000026	2015-12-31	0
000026	2016-12-31	0
000026	2017-12-31	0
000026	2018-12-31	0
000026	2019-12-31	0
000026	2020-12-31	0
000026	2021-12-31	0
000026	2022-12-31	0
000026	2023-12-31	0
000027	1999-12-31	0
000027	2000-12-31	0
000027	2001-12-31	0
000027	2002-12-31	0
000027	2003-12-31	0
000027	2004-12-31	0
000027	2005-12-31	0
000027	2006-12-31	0
000027	2007-12-31	0
000027	2008-12-31	0
000027	2009-12-31	0
000027	2010-12-31	0
000027	2011-12-31	0
000027	2012-12-31	0
000027	2013-12-31	0
000027	2014-12-31	0
000027	2015-12-31	0
000027	2016-12-31
000027	2017-12-31	0
000027	2018-12-31	0
000027	2019-12-31	0
000027	2020-12-31	0
000027	2021-12-31	0
000027	2022-12-31	0
000027	2023-12-31	0
000028	1999-12-31	0
000028	2000-12-31	0
000028	2001-12-31
000028	2002-12-31	0
000028	2003-12-31	0
000028	2004-12-31
000028	2005-12-31	0
000028	2006-12-31	0
000028	2007-12-31	0
000028	2008-12-31	0
000028	2009-12-31	0
000028	2010-12-31	0
000028	2011-12-31	0
000028	2012-12-31	0
000028	2013-12-31	0
000028	2014-12-31	0
000028	2015-12-31	0
000028	2016-12-31	0
000028	2017-12-31	0
000028	2018-12-31	0
000028	2019-12-31	0
000028	2020-12-31	0
000028	2021-12-31	0
000028	2022-12-31	0
000028	2023-12-31	0
000029	1999-12-31	0
000029	2000-12-31	0
000029	2001-12-31	0
000029	2002-12-31	0
000029	2003-12-31	0
000029	2004-12-31	0
000029	2005-12-31
000029	2006-12-31	0
000029	2007-12-31	0
000029	2008-12-31	0
000029	2009-12-31	0
000029	2010-12-31	0
000029	2011-12-31	0
000029	2012-12-31	0
000029	2013-12-31	0
000029	2014-12-31	0
000029	2015-12-31	0
000029	2016-12-31	0
000029	2017-12-31	0
000029	2018-12-31	0
000029	2019-12-31	0
000029	2020-12-31	0
000029	2021-12-31	0
000029	2022-12-31	1
000029	2023-12-31	1
000030	1999-12-31
000030	2000-12-31	0
000030	2001-12-31	0
000030	2002-12-31	1
000030	2003-12-31	0
000030	2004-12-31	0
000030	2005-12-31	0
000030	2006-12-31	0
000030	2007-12-31	0
000030	2008-12-31	1
000030	2009-12-31	1
000030	2010-12-31	1
000030	2011-12-31	1
000030	2012-12-31	1
000030	2013-12-31	0
000030	2014-12-31	0
000030	2015-12-31	0
000030	2016-12-31	0
000030	2017-12-31	0
000030	2018-12-31	0
000030	2019-12-31	0
000030	2020-12-31	0
000030	2021-12-31	0
000030	2022-12-31	0
000030	2023-12-31	0
000031	1999-12-31	1
000031	2000-12-31	1
000031	2001-12-31	1
000031	2002-12-31	0
000031	2003-12-31	0
000031	2004-12-31	0
000031	2005-12-31
000031	2006-12-31	0
000031	2007-12-31	0
000031	2008-12-31	0
000031	2009-12-31	0
000031	2010-12-31	0
000031	2011-12-31
000031	2012-12-31	0
000031	2013-12-31	0
000031	2014-12-31	0
000031	2015-12-31	0
000031	2016-12-31	0
000031	2017-12-31	0
000031	2018-12-31	0
000031	2019-12-31	0
000031	2020-12-31	0
000031	2021-12-31	0
000031	2022-12-31	0
000031	2023-12-31	0
000032	1999-12-31	0
000032	2000-12-31	0
000032	2001-12-31	0
000032	2002-12-31	0
000032	2003-12-31	0
000032	2004-12-31	0
000032	2005-12-31	0
000032	2006-12-31	0
000032	2007-12-31	0
000032	2008-12-31	0
000032	2009-12-31	0
000032	2010-12-31	0
000032	2011-12-31	0
000032	2012-12-31	0
000032	2013-12-31	0
000032	2014-12-31	0
000032	2015-12-31	0
000032	2016-12-31	0
000032	2017-12-31	0
000032	2018-12-31	0
000032	2019-12-31	0
000032	2020-12-31	0
000032	2021-12-31	0
000032	2022-12-31	0
000032	2023-12-31	0
000033	1999-12-31	0
000033	2000-12-31	0
000033	2001-12-31	0
000033	2002-12-31	0
000033	2003-12-31
000033	2004-12-31	0
000033	2005-12-31	1
000033	2006-12-31	1
000033	2007-12-31	1
000033	2008-12-31	1
000033	2009-12-31	1
000033	2010-12-31	1
000033	2011-12-31	1
000033	2012-12-31	1
000033	2013-12-31	1
000033	2014-12-31	1
000033	2015-12-31	1
000033	2016-12-31	1
000034	1999-12-31	0
000034	2000-12-31	0
000034	2001-12-31	0
000034	2002-12-31	0
000034	2003-12-31	0
000034	2004-12-31	0
000034	2005-12-31	1
000034	2006-12-31	1
000034	2007-12-31	1
000034	2008-12-31	1
000034	2009-12-31	1
000034	2010-12-31	1
000034	2011-12-31	1
000034	2012-12-31	1
000034	2013-12-31	1
000034	2014-12-31	1
000034	2015-12-31	1
000034	2016-12-31	0
000034	2017-12-31	1
000034	2018-12-31	1
000034	2019-12-31	1
000034	2020-12-31	1
000034	2021-12-31	1
000034	2022-12-31	1
000034	2023-12-31	1
000035	1999-12-31	0
000035	2000-12-31	0
000035	2001-12-31	0
000035	2002-12-31	0
000035	2003-12-31	0
000035	2004-12-31	0
000035	2005-12-31	0
000035	2006-12-31	0
000035	2007-12-31	0
000035	2008-12-31	0
000035	2009-12-31	0
000035	2010-12-31	0
000035	2011-12-31	1
000035	2012-12-31	1
000035	2013-12-31	1
000035	2014-12-31	0
000035	2015-12-31	0
000035	2016-12-31	0
000035	2017-12-31	0
000035	2018-12-31	0
000035	2019-12-31	0
000035	2020-12-31	0
000035	2021-12-31	0
000035	2022-12-31	0
000035	2023-12-31	0
000036	1999-12-31	0
000036	2000-12-31	0
000036	2001-12-31	0
000036	2002-12-31	0
000036	2003-12-31	0
000036	2004-12-31	0
000036	2005-12-31	0
000036	2006-12-31	0
000036	2007-12-31	0
000036	2008-12-31	0
000036	2009-12-31	0
000036	2010-12-31	0
000036	2011-12-31	0
000036	2012-12-31	0
000036	2013-12-31	0
000036	2014-12-31	0
000036	2015-12-31	0
000036	2016-12-31	0
000036	2017-12-31	0
000036	2018-12-31	0
000036	2019-12-31	0
000036	2020-12-31	0
000036	2021-12-31	0
000036	2022-12-31	0
000036	2023-12-31	0
000037	1999-12-31	0
000037	2000-12-31	0
000037	2001-12-31	0
000037	2002-12-31	0
000037	2003-12-31	0
000037	2004-12-31
000037	2005-12-31	0
000037	2006-12-31	0
000037	2007-12-31	0
000037	2008-12-31	0
000037	2009-12-31	0
000037	2010-12-31	0
000037	2011-12-31	0
000037	2012-12-31	0
000037	2013-12-31	0
000037	2014-12-31	0
000037	2015-12-31	0
000037	2016-12-31	0
000037	2017-12-31	0
000037	2018-12-31	0
000037	2019-12-31	0
000037	2020-12-31	0
000037	2021-12-31	0
000037	2022-12-31	0
000037	2023-12-31	0
000038	1999-12-31	0
000038	2000-12-31	0
000038	2001-12-31	0
000038	2002-12-31	1
000038	2003-12-31	1
000038	2004-12-31	1
000038	2005-12-31	0
000038	2006-12-31	1
000038	2007-12-31	1
000038	2008-12-31	1
000038	2009-12-31	1
000038	2010-12-31	1
000038	2011-12-31	1
000038	2012-12-31	1
000038	2013-12-31	1
000038	2014-12-31	1
000038	2015-12-31	0
000038	2016-12-31	0
000038	2017-12-31	0
000038	2018-12-31
000038	2019-12-31	1
000038	2020-12-31	1
000038	2021-12-31	1
000039	1999-12-31	0
000039	2000-12-31	0
000039	2001-12-31	0
000039	2002-12-31	0
000039	2003-12-31	0
000039	2004-12-31	0
000039	2005-12-31	0
000039	2006-12-31	0
000039	2007-12-31	0
000039	2008-12-31	0
000039	2009-12-31	0
000039	2010-12-31	0
000039	2011-12-31	0
000039	2012-12-31	0
000039	2013-12-31	0
000039	2014-12-31	0
000039	2015-12-31	0
000039	2016-12-31	0
000039	2017-12-31	0
000039	2018-12-31	0
000039	2019-12-31	0
000039	2020-12-31	1
000039	2021-12-31	1
000039	2022-12-31	1
000039	2023-12-31	0
000042	1999-12-31	0
000042	2000-12-31	0
000042	2001-12-31	0
000042	2002-12-31	0
000042	2003-12-31	0
000042	2004-12-31
000042	2005-12-31	0
000042	2006-12-31	0
000042	2007-12-31	0
000042	2008-12-31	0
000042	2009-12-31
000042	2010-12-31	0
000042	2011-12-31	0
000042	2012-12-31	0
000042	2013-12-31	0
000042	2014-12-31	1
000042	2015-12-31	1
000042	2016-12-31	1
000042	2017-12-31	1
000042	2018-12-31	0
000042	2019-12-31	0
000042	2020-12-31	0
000042	2021-12-31	0
000042	2022-12-31	1
000042	2023-12-31	1
000043	1999-12-31	0
000043	2000-12-31	0
000043	2001-12-31	0
000043	2002-12-31	0
000043	2003-12-31	0
000043	2004-12-31	0
000043	2005-12-31	0
000043	2006-12-31	0
000043	2007-12-31	0
000043	2008-12-31	0
000043	2009-12-31	0
000043	2010-12-31	0
000043	2011-12-31	0
000043	2012-12-31	0
000043	2013-12-31	0
000043	2014-12-31	0
000043	2015-12-31	0
000043	2016-12-31	0
000043	2017-12-31	0
000043	2018-12-31	0
000045	1999-12-31	0
000045	2000-12-31	0
000045	2001-12-31	0
000045	2002-12-31	0
000045	2003-12-31	0
000045	2004-12-31	0
000045	2005-12-31	0
000045	2006-12-31
000045	2007-12-31	0
000045	2008-12-31	0
000045	2009-12-31	0
000045	2010-12-31	0
000045	2011-12-31	0
000045	2012-12-31	0
000045	2013-12-31	0
000045	2014-12-31	0
000045	2015-12-31	1
000045	2016-12-31	1
000045	2017-12-31	0
000045	2018-12-31	0
000045	2019-12-31	0
000045	2020-12-31	0
000045	2021-12-31	0
000045	2022-12-31	0
000045	2023-12-31	0
000048	1999-12-31
000048	2000-12-31	0
000048	2001-12-31	0
000048	2002-12-31	0
000048	2003-12-31	1
000048	2004-12-31	1
000048	2005-12-31	1
000048	2006-12-31	1
000048	2007-12-31	1
000048	2008-12-31	1
000048	2009-12-31	1
000048	2010-12-31	1
000048	2011-12-31	1
000048	2012-12-31	1
000048	2013-12-31	1
000048	2014-12-31	0
000048	2015-12-31	0
000048	2016-12-31	0
000048	2017-12-31	0
000048	2018-12-31	0
000048	2019-12-31	0
000048	2020-12-31	0
000048	2021-12-31	0
000048	2022-12-31	0
000048	2023-12-31	0
000049	1999-12-31	0
000049	2000-12-31
000049	2001-12-31	0
000049	2002-12-31	0
000049	2003-12-31	0
000049	2004-12-31	0
000049	2005-12-31	0
000049	2006-12-31	0
000049	2007-12-31	0
000049	2008-12-31	0
000049	2009-12-31	0
000049	2010-12-31	0
000049	2011-12-31	0
000049	2012-12-31
000049	2013-12-31	0
000049	2014-12-31	0
000049	2015-12-31	0
000049	2016-12-31	0
000049	2017-12-31	0
000049	2018-12-31	0
000049	2019-12-31	0
000049	2020-12-31	0
000049	2021-12-31	0
000049	2022-12-31	0
000049	2023-12-31	0
000050	1999-12-31	0
000050	2000-12-31	0
000050	2001-12-31	0
000050	2002-12-31	0
000050	2003-12-31	0
000050	2004-12-31	0
000050	2005-12-31	0
000050	2006-12-31	0
000050	2007-12-31	0
000050	2008-12-31	0
000050	2009-12-31	0
000050	2010-12-31	0
000050	2011-12-31	0
000050	2012-12-31	0
000050	2013-12-31	0
000050	2014-12-31	0
000050	2015-12-31	0
000050	2016-12-31	0
000050	2017-12-31	0
000050	2018-12-31	0
000050	2019-12-31	0
000050	2020-12-31	0
000050	2021-12-31	0
000050	2022-12-31	0
000050	2023-12-31	0
000055	1999-12-31	1
000055	2000-12-31	1
000055	2001-12-31	1
000055	2002-12-31	1
000055	2003-12-31	1
000055	2004-12-31	1
000055	2005-12-31	1
000055	2006-12-31	1
000055	2007-12-31	1
000055	2008-12-31	1
000055	2009-12-31	1
000055	2010-12-31	1
000055	2011-12-31	1
000055	2012-12-31	1
000055	2013-12-31	1
000055	2014-12-31	1
000055	2015-12-31	1
000055	2016-12-31	1
000055	2017-12-31	1
000055	2018-12-31	1
000055	2019-12-31	1
000055	2020-12-31	1
000055	2021-12-31	1
000055	2022-12-31	1
000055	2023-12-31	0
000056	1999-12-31	0
000056	2000-12-31	0
000056	2001-12-31	0
000056	2002-12-31	0
000056	2003-12-31	0
000056	2004-12-31	0
000056	2005-12-31	0
000056	2006-12-31	0
000056	2007-12-31	0
000056	2008-12-31	0
000056	2009-12-31	0
000056	2010-12-31	0
000056	2011-12-31	0
000056	2012-12-31	0
000056	2013-12-31	0
000056	2014-12-31	0
000056	2015-12-31	0
000056	2016-12-31	0
000056	2017-12-31	0
000056	2018-12-31	0
000056	2019-12-31	0
000056	2020-12-31	0
000056	2021-12-31	0
000056	2022-12-31	0
000056	2023-12-31	0
000058	1999-12-31	0
000058	2000-12-31	0
000058	2001-12-31	0
000058	2002-12-31	0
000058	2003-12-31	0
000058	2004-12-31	0
000058	2005-12-31	0
000058	2006-12-31	0
000058	2007-12-31	0
000058	2008-12-31	0
000058	2009-12-31	0
000058	2010-12-31	0
000058	2011-12-31	0
000058	2012-12-31	0
000058	2013-12-31	0
000058	2014-12-31	0
000058	2015-12-31	0
000058	2016-12-31	0
000058	2017-12-31	0
000058	2018-12-31
000058	2019-12-31	0
000058	2020-12-31	0
000058	2021-12-31	0
000058	2022-12-31	0
000058	2023-12-31
000059	1999-12-31	0
000059	2000-12-31	0
000059	2001-12-31
000059	2002-12-31	0
000059	2003-12-31	0
000059	2004-12-31	0
000059	2005-12-31	0
000059	2006-12-31	0
000059	2007-12-31	0
000059	2008-12-31	0
000059	2009-12-31	0
000059	2010-12-31	0
000059	2011-12-31	0
000059	2012-12-31	0
000059	2013-12-31	0
000059	2014-12-31	0
000059	2015-12-31	1
000059	2016-12-31	1
000059	2017-12-31	1
000059	2018-12-31	0
000059	2019-12-31	0
000059	2020-12-31	0
000059	2021-12-31	0
000059	2022-12-31	0
000059	2023-12-31	0
000060	1999-12-31	0
000060	2000-12-31	0
000060	2001-12-31	0
000060	2002-12-31	0
000060	2003-12-31	0
000060	2004-12-31
000060	2005-12-31	0
000060	2006-12-31	0
000060	2007-12-31	0
000060	2008-12-31	0
000060	2009-12-31	0
000060	2010-12-31	0
000060	2011-12-31	0
000060	2012-12-31	0
000060	2013-12-31	0
000060	2014-12-31	0
000060	2015-12-31	0
000060	2016-12-31
000060	2017-12-31	1
000060	2018-12-31	1
000060	2019-12-31	0
000060	2020-12-31	0
000060	2021-12-31	0
000060	2022-12-31	0
000060	2023-12-31	0
000061	1999-12-31	1
000061	2000-12-31	0
000061	2001-12-31	0
000061	2002-12-31	0
000061	2003-12-31	0
000061	2004-12-31	0
000061	2005-12-31	0
000061	2006-12-31	0
000061	2007-12-31	0
000061	2008-12-31	0
000061	2009-12-31	0
000061	2010-12-31	0
000061	2011-12-31	0
000061	2012-12-31	0
000061	2013-12-31	0
000061	2014-12-31	0
000061	2015-12-31	0
000061	2016-12-31	0
000061	2017-12-31	0
000061	2018-12-31	0
000061	2019-12-31	0
000061	2020-12-31	0
000061	2021-12-31	0
000061	2022-12-31
000061	2023-12-31
000062	1999-12-31	1
000062	2000-12-31	0
000062	2001-12-31	0
000062	2002-12-31	0
000062	2003-12-31	0
000062	2004-12-31	0
000062	2005-12-31	0
000062	2006-12-31	0
000062	2007-12-31	0
000062	2008-12-31	0
000062	2009-12-31	0
000062	2010-12-31	0
000062	2011-12-31	0
000062	2012-12-31	0
000062	2013-12-31	0
000062	2014-12-31	1
000062	2015-12-31	1
000062	2016-12-31	1
000062	2017-12-31	1
000062	2018-12-31	1
000062	2019-12-31	1
000062	2020-12-31	1
000062	2021-12-31	1
000062	2022-12-31	0
000062	2023-12-31	0
000063	1999-12-31	0
000063	2000-12-31
000063	2001-12-31	0
000063	2002-12-31	0
000063	2003-12-31	0
000063	2004-12-31	0
000063	2005-12-31	0
000063	2006-12-31	0
000063	2007-12-31	0
000063	2008-12-31	0
000063	2009-12-31	0
000063	2010-12-31	0
000063	2011-12-31	0
000063	2012-12-31	0
000063	2013-12-31	0
000063	2014-12-31	0
000063	2015-12-31
000063	2016-12-31
000063	2017-12-31	0
000063	2018-12-31	0
000063	2019-12-31	0
000063	2020-12-31	0
000063	2021-12-31	0
000063	2022-12-31	0
000063	2023-12-31	0
000065	1999-12-31	0
000065	2000-12-31	0
000065	2001-12-31	0
000065	2002-12-31	0
000065	2003-12-31	0
000065	2004-12-31	0
000065	2005-12-31	0
000065	2006-12-31	0
000065	2007-12-31	0
000065	2008-12-31	0
000065	2009-12-31	0
000065	2010-12-31
000065	2011-12-31	0
000065	2012-12-31	0
000065	2013-12-31	0
000065	2014-12-31	0
000065	2015-12-31	0
000065	2016-12-31	0
000065	2017-12-31	0
000065	2018-12-31	0
000065	2019-12-31	0
000065	2020-12-31	0
000065	2021-12-31	0
000065	2022-12-31	0
000065	2023-12-31	0
000066	1999-12-31	0
000066	2000-12-31	0
000066	2001-12-31	0
000066	2002-12-31	0
000066	2003-12-31	0
000066	2004-12-31	0
000066	2005-12-31	0
000066	2006-12-31	0
000066	2007-12-31	0
000066	2008-12-31	0
000066	2009-12-31	0
000066	2010-12-31	0
000066	2011-12-31	0
000066	2012-12-31	0
000066	2013-12-31	0
000066	2014-12-31	0
000066	2015-12-31	0
000066	2016-12-31	0
000066	2017-12-31	0
000066	2018-12-31	0
000066	2019-12-31	0
000066	2020-12-31	0
000066	2021-12-31	0
000066	2022-12-31	0
000066	2023-12-31	0
000068	1999-12-31	0
000068	2000-12-31	0
000068	2001-12-31	0
000068	2002-12-31	0
000068	2003-12-31	0
000068	2004-12-31	0
000068	2005-12-31	0
000068	2006-12-31	0
000068	2007-12-31	0
000068	2008-12-31	0
000068	2009-12-31	0
000068	2010-12-31	0
000068	2011-12-31	0
000068	2012-12-31	0
000068	2013-12-31	0
000068	2014-12-31	0
000068	2015-12-31	0
000068	2016-12-31	0
000068	2017-12-31	0
000068	2018-12-31	0
000068	2019-12-31	1
000068	2020-12-31	0
000068	2021-12-31	0
000068	2022-12-31	0
000068	2023-12-31	0
000069	1999-12-31	0
000069	2000-12-31	0
000069	2001-12-31	0
000069	2002-12-31	0
000069	2003-12-31	0
000069	2004-12-31	0
000069	2005-12-31	0
000069	2006-12-31	0
000069	2007-12-31	0
000069	2008-12-31	0
000069	2009-12-31	0
000069	2010-12-31	0
000069	2011-12-31	0
000069	2012-12-31	0
000069	2013-12-31	0
000069	2014-12-31	0
000069	2015-12-31	0
000069	2016-12-31	0
000069	2017-12-31	0
000069	2018-12-31	0
000069	2019-12-31	0
000069	2020-12-31	0
000069	2021-12-31	0
000069	2022-12-31	0
000069	2023-12-31	0
000078	1999-12-31	0
000078	2000-12-31	0
000078	2001-12-31	1
000078	2002-12-31	1
000078	2003-12-31	0
000078	2004-12-31	0
000078	2005-12-31	0
000078	2006-12-31	0
000078	2007-12-31	0
000078	2008-12-31	0
000078	2009-12-31	0
000078	2010-12-31	0
000078	2011-12-31	0
000078	2012-12-31	0
000078	2013-12-31	0
000078	2014-12-31	0
000078	2015-12-31	0
000078	2016-12-31	0
000078	2017-12-31	0
000078	2018-12-31	0
000078	2019-12-31	0
000078	2020-12-31	0
000078	2021-12-31	0
000078	2022-12-31	0
000078	2023-12-31	0
000088	1999-12-31	0
000088	2000-12-31	0
000088	2001-12-31	0
000088	2002-12-31	0
000088	2003-12-31	0
000088	2004-12-31	0
000088	2005-12-31	0
000088	2006-12-31	0
000088	2007-12-31
000088	2008-12-31	0
000088	2009-12-31	0
000088	2010-12-31	0
000088	2011-12-31	0
000088	2012-12-31	0
000088	2013-12-31	0
000088	2014-12-31	0
000088	2015-12-31	0
000088	2016-12-31	0
000088	2017-12-31	0
000088	2018-12-31	0
000088	2019-12-31	0
000088	2020-12-31	0
000088	2021-12-31	0
000088	2022-12-31	0
000088	2023-12-31	0
000089	1999-12-31	0
000089	2000-12-31
000089	2001-12-31	0
000089	2002-12-31	0
000089	2003-12-31	0
000089	2004-12-31	0
000089	2005-12-31	0
000089	2006-12-31	0
000089	2007-12-31	0
000089	2008-12-31	0
000089	2009-12-31	0
000089	2010-12-31	0
000089	2011-12-31	0
000089	2012-12-31	0
000089	2013-12-31	0
000089	2014-12-31	0
000089	2015-12-31	0
000089	2016-12-31	0
000089	2017-12-31	0
000089	2018-12-31	0
000089	2019-12-31	0
000089	2020-12-31	0
000089	2021-12-31	0
000089	2022-12-31	0
000089	2023-12-31	0
000090	1999-12-31	0
000090	2000-12-31	0
000090	2001-12-31	0
000090	2002-12-31
000090	2003-12-31	0
000090	2004-12-31
000090	2005-12-31	0
000090	2006-12-31	0
000090	2007-12-31	0
000090	2008-12-31	0
000090	2009-12-31	0
000090	2010-12-31	0
000090	2011-12-31	1
000090	2012-12-31	0
000090	2013-12-31	0
000090	2014-12-31	0
000090	2015-12-31	0
000090	2016-12-31	0
000090	2017-12-31	0
000090	2018-12-31	0
000090	2019-12-31	0
000090	2020-12-31	0
000090	2021-12-31	0
000090	2022-12-31	0
000090	2023-12-31
000096	2000-12-31	0
000096	2001-12-31	0
000096	2002-12-31	0
000096	2003-12-31	0
000096	2004-12-31
000096	2005-12-31	0
000096	2006-12-31	0
000096	2007-12-31	0
000096	2008-12-31	0
000096	2009-12-31	0
000096	2010-12-31	0
000096	2011-12-31	0
000096	2012-12-31	0
000096	2013-12-31	0
000096	2014-12-31	0
000096	2015-12-31	0
000096	2016-12-31	0
000096	2017-12-31	0
000096	2018-12-31	0
000096	2019-12-31	0
000096	2020-12-31	0
000096	2021-12-31	0
000096	2022-12-31	0
000096	2023-12-31	0
000099	2000-12-31	0
000099	2001-12-31	0
000099	2002-12-31	0
000099	2003-12-31	0
000099	2004-12-31	0
000099	2005-12-31	0
000099	2006-12-31	0
000099	2007-12-31	0
000099	2008-12-31	0
000099	2009-12-31	0
000099	2010-12-31	0
000099	2011-12-31	0
000099	2012-12-31	0
000099	2013-12-31	0
000099	2014-12-31	0
000099	2015-12-31	0
000099	2016-12-31
000099	2017-12-31	0
000099	2018-12-31	0
000099	2019-12-31	0
000099	2020-12-31	0
000099	2021-12-31	0
000099	2022-12-31	0
000099	2023-12-31	0
000100	2004-12-31	1
000100	2005-12-31	1
000100	2006-12-31	1
000100	2007-12-31	1
000100	2008-12-31	1
000100	2009-12-31	1
000100	2010-12-31	1
000100	2011-12-31	1
000100	2012-12-31	1
000100	2013-12-31	1
000100	2014-12-31	1
000100	2015-12-31	1
000100	2016-12-31	1
000100	2017-12-31	1
000100	2018-12-31	1
000100	2019-12-31	1
000100	2020-12-31	1
000100	2021-12-31	1
000100	2022-12-31	1
000100	2023-12-31	1
000151	2000-12-31	0
000151	2001-12-31	0
000151	2002-12-31	0
000151	2003-12-31	0
000151	2004-12-31	0
000151	2005-12-31	0
000151	2006-12-31	0
000151	2007-12-31	0
000151	2008-12-31	0
000151	2009-12-31	0
000151	2010-12-31	0
000151	2011-12-31	0
000151	2012-12-31	0
000151	2013-12-31	0
000151	2014-12-31	0
000151	2015-12-31	0
000151	2016-12-31	0
000151	2017-12-31	0
000151	2018-12-31	0
000151	2019-12-31	0
000151	2020-12-31	0
000151	2021-12-31
000151	2022-12-31
000151	2023-12-31
000153	2000-12-31	0
000153	2001-12-31	0
000153	2002-12-31	0
000153	2003-12-31	0
000153	2004-12-31	0
000153	2005-12-31	0
000153	2006-12-31	0
000153	2007-12-31	0
000153	2008-12-31	0
000153	2009-12-31	0
000153	2010-12-31	0
000153	2011-12-31	0
000153	2012-12-31	0
000153	2013-12-31	0
000153	2014-12-31	0
000153	2015-12-31	0
000153	2016-12-31	0
000153	2017-12-31	0
000153	2018-12-31	0
000153	2019-12-31	0
000153	2020-12-31	0
000153	2021-12-31	0
000153	2022-12-31	0
000153	2023-12-31	0
000155	2000-12-31	0
000155	2001-12-31	0
000155	2002-12-31	0
000155	2003-12-31	0
000155	2004-12-31	0
000155	2005-12-31	0
000155	2006-12-31	0
000155	2007-12-31	0
000155	2008-12-31	0
000155	2009-12-31	0
000155	2010-12-31	0
000155	2011-12-31	0
000155	2012-12-31	0
000155	2013-12-31	0
000155	2014-12-31	0
000155	2015-12-31
000155	2016-12-31	0
000155	2017-12-31	0
000155	2018-12-31	0
000155	2019-12-31	0
000155	2020-12-31	0
000155	2021-12-31	0
000155	2022-12-31	0
000155	2023-12-31	0
000156	2000-12-31	1
000156	2001-12-31	1
000156	2002-12-31	1
000156	2003-12-31	0
000156	2004-12-31	0
000156	2005-12-31	0
000156	2006-12-31
000156	2007-12-31
000156	2008-12-31
000156	2009-12-31	0
000156	2010-12-31	0
000156	2011-12-31	0
000156	2012-12-31	1
000156	2013-12-31	1
000156	2014-12-31	1
000156	2015-12-31	0
000156	2016-12-31	0
000156	2017-12-31
000156	2018-12-31	0
000156	2019-12-31	0
000156	2020-12-31	0
000156	2021-12-31	0
000156	2022-12-31	0
000156	2023-12-31	0
000157	2000-12-31	0
000157	2001-12-31	0
000157	2002-12-31	0
000157	2003-12-31	0
000157	2004-12-31	0
000157	2005-12-31	0
000157	2006-12-31	1
000157	2007-12-31	1
000157	2008-12-31	1
000157	2009-12-31	1
000157	2010-12-31	1
000157	2011-12-31	1
000157	2012-12-31	1
000157	2013-12-31	1
000157	2014-12-31	1
000157	2015-12-31	1
000157	2016-12-31	1
000157	2017-12-31	1
000157	2018-12-31	1
000157	2019-12-31	1
000157	2020-12-31	1
000157	2021-12-31	1
000157	2022-12-31	1
000157	2023-12-31	1
000158	2000-12-31	0
000158	2001-12-31	0
000158	2002-12-31	0
000158	2003-12-31	0
000158	2004-12-31	0
000158	2005-12-31	0
000158	2006-12-31	0
000158	2007-12-31	0
000158	2008-12-31	0
000158	2009-12-31	0
000158	2010-12-31	0
000158	2011-12-31	0
000158	2012-12-31	0
000158	2013-12-31	0
000158	2014-12-31	0
000158	2015-12-31	0
000158	2016-12-31	0
000158	2017-12-31	0
000158	2018-12-31	0
000158	2019-12-31	0
000158	2020-12-31	0
000158	2021-12-31	0
000158	2022-12-31	0
000158	2023-12-31	0
000159	2000-12-31	0
000159	2001-12-31	1
000159	2002-12-31	0
000159	2003-12-31	0
000159	2004-12-31	0
000159	2005-12-31	1
000159	2006-12-31	1
000159	2007-12-31	1
000159	2008-12-31	0
000159	2009-12-31	0
000159	2010-12-31	0
000159	2011-12-31	0
000159	2012-12-31	0
000159	2013-12-31	0
000159	2014-12-31	0
000159	2015-12-31	0
000159	2016-12-31	0
000159	2017-12-31	1
000159	2018-12-31	1
000159	2019-12-31	1
000159	2020-12-31	1
000159	2021-12-31	1
000159	2022-12-31	0
000159	2023-12-31	0
000301	2000-12-31	1
000301	2001-12-31	1
000301	2002-12-31	1
000301	2003-12-31	0
000301	2004-12-31	0
000301	2005-12-31	0
000301	2006-12-31	0
000301	2007-12-31
000301	2008-12-31	0
000301	2009-12-31	0
000301	2010-12-31	0
000301	2011-12-31	0
000301	2012-12-31	0
000301	2013-12-31	0
000301	2014-12-31	1
000301	2015-12-31	1
000301	2016-12-31	1
000301	2017-12-31	1
000301	2018-12-31	1
000301	2019-12-31	1
000301	2020-12-31	1
000301	2021-12-31	1
000301	2022-12-31	1
000301	2023-12-31	1
000333	2013-12-31	1
000333	2014-12-31	1
000333	2015-12-31	1
000333	2016-12-31	1
000333	2017-12-31	1
000333	2018-12-31	1
000333	2019-12-31	1
000333	2020-12-31	1
000333	2021-12-31	1
000333	2022-12-31	1
000333	2023-12-31	1
000338	2007-12-31	1
000338	2008-12-31	1
000338	2009-12-31	1
000338	2010-12-31	1
000338	2011-12-31	1
000338	2012-12-31	1
000338	2013-12-31	1
000338	2014-12-31	1
000338	2015-12-31	1
000338	2016-12-31	1
000338	2017-12-31	1
000338	2018-12-31	1
000338	2019-12-31	1
000338	2020-12-31	1
000338	2021-12-31	1
000338	2022-12-31	1
000338	2023-12-31	0
000400	1999-12-31
000400	2000-12-31	0
000400	2001-12-31	0
000400	2002-12-31	0
000400	2003-12-31	0
000400	2004-12-31	0
000400	2005-12-31	0
000400	2006-12-31	0
000400	2007-12-31	0
000400	2008-12-31	0
000400	2009-12-31	0
000400	2010-12-31	0
000400	2011-12-31	0
000400	2012-12-31	0
000400	2013-12-31	0
000400	2014-12-31	0
000400	2015-12-31	0
000400	2016-12-31	0
000400	2017-12-31	0
000400	2018-12-31	0
000400	2019-12-31	0
000400	2020-12-31	0
000400	2021-12-31	0
000400	2022-12-31
000400	2023-12-31	0
000401	1999-12-31	0
000401	2000-12-31	0
000401	2001-12-31	0
000401	2002-12-31	0
000401	2003-12-31	0
000401	2004-12-31	0
000401	2005-12-31	0
000401	2006-12-31	0
000401	2007-12-31	0
000401	2008-12-31	0
000401	2009-12-31	0
000401	2010-12-31	0
000401	2011-12-31	0
000401	2012-12-31	0
000401	2013-12-31	0
000401	2014-12-31	0
000401	2015-12-31	0
000401	2016-12-31	0
000401	2017-12-31	0
000401	2018-12-31	0
000401	2019-12-31	0
000401	2020-12-31	0
000401	2021-12-31	0
000401	2022-12-31	0
000401	2023-12-31	0
000402	1999-12-31	0
000402	2000-12-31	0
000402	2001-12-31	0
000402	2002-12-31	0
000402	2003-12-31	0
000402	2004-12-31	0
000402	2005-12-31	0
000402	2006-12-31	0
000402	2007-12-31	0
000402	2008-12-31	0
000402	2009-12-31	0
000402	2010-12-31	0
000402	2011-12-31	0
000402	2012-12-31	0
000402	2013-12-31	0
000402	2014-12-31	0
000402	2015-12-31	0
000402	2016-12-31	0
000402	2017-12-31	0
000402	2018-12-31	0
000402	2019-12-31	0
000402	2020-12-31	0
000402	2021-12-31	0
000402	2022-12-31	0
000402	2023-12-31	0
000403	1999-12-31	0
000403	2000-12-31	0
000403	2001-12-31	0
000403	2002-12-31	0
000403	2003-12-31	0
000403	2004-12-31	0
000403	2005-12-31	1
000403	2006-12-31	1
000403	2007-12-31	0
000403	2008-12-31	1
000403	2009-12-31	1
000403	2010-12-31	1
000403	2011-12-31	1
000403	2012-12-31	1
000403	2013-12-31	1
000403	2014-12-31	1
000403	2015-12-31	1
000403	2016-12-31	1
000403	2017-12-31	1
000403	2018-12-31	0
000403	2019-12-31	0
000403	2020-12-31	0
000403	2021-12-31	0
000403	2022-12-31	0
000403	2023-12-31	0
000404	1999-12-31	0
000404	2000-12-31	0
000404	2001-12-31	0
000404	2002-12-31
000404	2003-12-31	0
000404	2004-12-31	0
000404	2005-12-31	0
000404	2006-12-31	0
000404	2007-12-31
000404	2008-12-31	0
000404	2009-12-31	0
000404	2010-12-31	0
000404	2011-12-31	0
000404	2012-12-31	0
000404	2013-12-31	0
000404	2014-12-31	0
000404	2015-12-31	0
000404	2016-12-31	0
000404	2017-12-31	0
000404	2018-12-31	0
000404	2019-12-31	0
000404	2020-12-31	0
000404	2021-12-31	0
000404	2022-12-31	0
000404	2023-12-31	0
000406	1999-12-31	0
000406	2000-12-31
000406	2001-12-31	0
000406	2002-12-31	0
000406	2003-12-31	0
000406	2004-12-31	0
000406	2005-12-31	0
000407	1999-12-31	0
000407	2000-12-31	0
000407	2001-12-31	0
000407	2002-12-31	0
000407	2003-12-31	0
000407	2004-12-31	0
000407	2005-12-31	0
000407	2006-12-31	0
000407	2007-12-31	0
000407	2008-12-31	0
000407	2009-12-31	0
000407	2010-12-31
000407	2011-12-31	0
000407	2012-12-31	0
000407	2013-12-31	0
000407	2014-12-31	0
000407	2015-12-31
000407	2016-12-31	0
000407	2017-12-31
000407	2018-12-31	0
000407	2019-12-31	0
000407	2020-12-31	0
000407	2021-12-31	0
000407	2022-12-31	0
000407	2023-12-31	0
000408	1999-12-31	0
000408	2000-12-31	0
000408	2001-12-31	0
000408	2002-12-31	0
000408	2003-12-31	0
000408	2004-12-31	0
000408	2005-12-31	0
000408	2006-12-31	0
000408	2007-12-31	0
000408	2008-12-31	0
000408	2009-12-31	0
000408	2010-12-31	0
000408	2011-12-31	0
000408	2012-12-31	0
000408	2013-12-31	1
000408	2014-12-31	0
000408	2015-12-31	0
000408	2016-12-31	0
000408	2017-12-31	0
000408	2018-12-31	0
000408	2019-12-31	0
000408	2020-12-31	0
000408	2021-12-31	0
000408	2022-12-31	0
000408	2023-12-31	0
000409	1999-12-31	0
000409	2000-12-31	0
000409	2001-12-31	0
000409	2002-12-31	0
000409	2003-12-31	0
000409	2004-12-31	0
000409	2005-12-31	0
000409	2006-12-31	0
000409	2007-12-31	0
000409	2008-12-31	0
000409	2009-12-31	0
000409	2010-12-31	0
000409	2011-12-31	0
000409	2012-12-31	0
000409	2013-12-31	0
000409	2014-12-31	0
000409	2015-12-31	0
000409	2016-12-31	0
000409	2017-12-31	0
000409	2018-12-31	0
000409	2019-12-31	0
000409	2020-12-31	0
000409	2021-12-31	0
000409	2022-12-31	0
000409	2023-12-31	0
000410	1999-12-31	1
000410	2000-12-31
000410	2001-12-31	0
000410	2002-12-31	0
000410	2003-12-31	0
000410	2004-12-31	0
000410	2005-12-31	0
000410	2006-12-31
000410	2007-12-31	0
000410	2008-12-31	0
000410	2009-12-31	0
000410	2010-12-31	0
000410	2011-12-31	0
000410	2012-12-31	0
000410	2013-12-31	0
000410	2014-12-31	0
000410	2015-12-31	0
000410	2016-12-31	0
000410	2017-12-31	0
000410	2018-12-31	0
000410	2019-12-31	0
000410	2020-12-31	0
000410	2021-12-31	0
000410	2022-12-31	0
000410	2023-12-31	0
000411	1999-12-31	0
000411	2000-12-31	0
000411	2001-12-31	0
000411	2002-12-31	0
000411	2003-12-31	0
000411	2004-12-31	0
000411	2005-12-31	0
000411	2006-12-31	0
000411	2007-12-31	0
000411	2008-12-31	0
000411	2009-12-31	0
000411	2010-12-31	0
000411	2011-12-31	0
000411	2012-12-31	0
000411	2013-12-31	0
000411	2014-12-31	0
000411	2015-12-31	0
000411	2016-12-31	0
000411	2017-12-31	0
000411	2018-12-31	0
000411	2019-12-31	0
000411	2020-12-31	0
000411	2021-12-31	0
000411	2022-12-31	0
000411	2023-12-31	0
000415	1999-12-31	0
000415	2000-12-31	0
000415	2001-12-31	0
000415	2002-12-31	0
000415	2003-12-31	0
000415	2004-12-31	0
000415	2005-12-31	0
000415	2006-12-31	1
000415	2007-12-31	0
000415	2008-12-31	0
000415	2009-12-31	1
000415	2010-12-31	1
000415	2011-12-31	0
000415	2012-12-31	0
000415	2013-12-31	0
000415	2014-12-31	0
000415	2015-12-31
000415	2016-12-31	1
000415	2017-12-31	1
000415	2018-12-31	0
000415	2019-12-31	0
000415	2020-12-31	0
000415	2021-12-31	0
000415	2022-12-31	0
000415	2023-12-31	0
000417	1999-12-31	0
000417	2000-12-31	1
000417	2001-12-31	1
000417	2002-12-31	1
000417	2003-12-31	1
000417	2004-12-31	1
000417	2005-12-31	1
000417	2006-12-31	0
000417	2007-12-31	0
000417	2008-12-31	0
000417	2009-12-31	0
000417	2010-12-31	1
000417	2011-12-31	1
000417	2012-12-31	1
000417	2013-12-31	0
000417	2014-12-31	0
000417	2015-12-31	0
000417	2016-12-31
000417	2017-12-31	0
000417	2018-12-31	0
000417	2019-12-31	0
000417	2020-12-31	0
000417	2021-12-31	0
000417	2022-12-31
000417	2023-12-31	0
000418	1999-12-31	1
000418	2000-12-31	1
000418	2001-12-31	0
000418	2002-12-31	0
000418	2003-12-31	0
000418	2004-12-31	0
000418	2005-12-31	0
000418	2006-12-31
000418	2007-12-31	0
000418	2008-12-31	0
000418	2009-12-31	0
000418	2010-12-31	0
000418	2011-12-31	0
000418	2012-12-31	0
000418	2013-12-31	0
000418	2014-12-31	0
000418	2015-12-31	0
000418	2016-12-31	0
000418	2017-12-31	0
000418	2018-12-31	0
000419	1999-12-31	1
000419	2000-12-31	1
000419	2001-12-31	1
000419	2002-12-31	1
000419	2003-12-31	1
000419	2004-12-31	1
000419	2005-12-31	1
000419	2006-12-31	1
000419	2007-12-31	1
000419	2008-12-31	1
000419	2009-12-31	1
000419	2010-12-31	1
000419	2011-12-31	1
000419	2012-12-31	1
000419	2013-12-31	1
000419	2014-12-31	1
000419	2015-12-31	1
000419	2016-12-31	1
000419	2017-12-31	1
000419	2018-12-31	1
000419	2019-12-31	1
000419	2020-12-31	1
000419	2021-12-31	1
000419	2022-12-31	1
000419	2023-12-31	1
000420	1999-12-31	1
000420	2000-12-31	1
000420	2001-12-31	1
000420	2002-12-31	0
000420	2003-12-31	0
000420	2004-12-31	0
000420	2005-12-31	0
000420	2006-12-31	0
000420	2007-12-31	0
000420	2008-12-31	0
000420	2009-12-31	0
000420	2010-12-31	0
000420	2011-12-31	0
000420	2012-12-31	0
000420	2013-12-31	0
000420	2014-12-31	0
[truncated: 55,818 more rows]
