# Supplementary material for: How corporate ESG performance enables New-qualitive Productive forces development based on Listed companies in the manufacturing industry: Evidence from China
Source: Research Square preprint supplement (doi:10.21203/rs.3.rs-6158355/v1), 2025-07-24
Supplement: Supplementary file 4 [file 2fba2dcc8925e9a77165bb03.xlsx]

## Sheet: sheet1
Stkcd	Stknme	Accper	Audittyp
证券代码	证券简称	会计截止日期	审计意见类型
没有单位	没有单位	没有单位	没有单位
000002	万科A	1992-12-31	标准无保留意见	1
000002	万科A	1993-12-31	标准无保留意见	1
000002	万科A	1994-12-31	标准无保留意见	1
000002	万科A	1995-12-31	标准无保留意见	1
000002	万科A	1996-12-31	标准无保留意见	1
000002	万科A	1997-12-31	标准无保留意见	1
000002	万科A	1998-12-31	标准无保留意见	1
000002	万科A	1999-06-30	标准无保留意见	1
000002	万科A	1999-12-31	标准无保留意见	1
000002	万科A	2000-12-31	标准无保留意见	1
000002	万科A	2001-12-31	标准无保留意见	1
000002	万科A	2002-12-31	标准无保留意见	1
000002	万科A	2003-12-31	标准无保留意见	1
000002	万科A	2004-12-31	标准无保留意见	1
000002	万科A	2005-12-31	标准无保留意见	1
000002	万科A	2006-12-31	标准无保留意见	1
000002	万科A	2007-12-31	标准无保留意见	1
000002	万科A	2008-12-31	标准无保留意见	1
000002	万科A	2009-12-31	标准无保留意见	1
000002	万科A	2010-12-31	标准无保留意见	1
000002	万科A	2011-12-31	标准无保留意见	1
000002	万科A	2012-12-31	标准无保留意见	1
000002	万科A	2013-12-31	标准无保留意见	1
000002	万科A	2014-12-31	标准无保留意见	1
000002	万科A	2015-12-31	标准无保留意见	1
000002	万科A	2016-12-31	标准无保留意见	1
000002	万科A	2017-12-31	标准无保留意见	1
000002	万科A	2018-12-31	标准无保留意见	1
000002	万科A	2019-12-31	标准无保留意见	1
000002	万科A	2020-12-31	标准无保留意见	1
000002	万科A	2021-12-31	标准无保留意见	1
000002	万科A	2022-12-31	标准无保留意见	1
000002	万科A	2023-12-31	标准无保留意见	1
000004	国华网安	1991-12-31	标准无保留意见	1
000004	国华网安	1992-12-31	标准无保留意见	1
000004	国华网安	1993-12-31	标准无保留意见	1
000004	国华网安	1994-12-31		0
000004	国华网安	1995-12-31	保留意见加说明段	0
000004	国华网安	1996-12-31	无保留意见加说明段	0
000004	国华网安	1997-06-30	标准无保留意见	1
000004	国华网安	1997-12-31	标准无保留意见	1
000004	国华网安	1998-12-31	标准无保留意见	1
000004	国华网安	1999-06-30	无保留意见加说明段	0
000004	国华网安	1999-12-31	标准无保留意见	1
000004	国华网安	2000-12-31	标准无保留意见	1
000004	国华网安	2001-06-30	标准无保留意见	1
000004	国华网安	2001-12-31	标准无保留意见	1
000004	国华网安	2002-12-31	标准无保留意见	1
000004	国华网安	2003-12-31	标准无保留意见	1
000004	国华网安	2004-12-31	标准无保留意见	1
000004	国华网安	2005-12-31	标准无保留意见	1
000004	国华网安	2006-12-31	标准无保留意见	1
000004	国华网安	2007-12-31	标准无保留意见	1
000004	国华网安	2008-12-31	标准无保留意见	1
000004	国华网安	2009-12-31	标准无保留意见	1
000004	国华网安	2010-12-31	标准无保留意见	1
000004	国华网安	2011-12-31	标准无保留意见	1
000004	国华网安	2012-12-31	标准无保留意见	1
000004	国华网安	2013-12-31	标准无保留意见	1
000004	国华网安	2014-12-31	标准无保留意见	1
000004	国华网安	2015-12-31	标准无保留意见	1
000004	国华网安	2016-12-31	标准无保留意见	1
000004	国华网安	2017-12-31	带有解释性说明的无保留意见	0
000004	国华网安	2018-12-31	标准无保留意见	1
000004	国华网安	2019-12-31	标准无保留意见	1
000004	国华网安	2020-12-31	标准无保留意见	1
000004	国华网安	2021-12-31	保留意见	0
000004	国华网安	2022-12-31	标准无保留意见	1
000004	国华网安	2023-12-31	标准无保留意见	1
000006	深振业A	1992-12-31	标准无保留意见	1
000006	深振业A	1993-12-31		0
000006	深振业A	1994-12-31	标准无保留意见	1
000006	深振业A	1995-12-31	无保留意见加说明段	0
000006	深振业A	1996-12-31	无保留意见加说明段	0
000006	深振业A	1997-12-31	标准无保留意见	1
000006	深振业A	1998-12-31	标准无保留意见	1
000006	深振业A	1999-12-31	标准无保留意见	1
000006	深振业A	2000-12-31	标准无保留意见	1
000006	深振业A	2001-12-31	标准无保留意见	1
000006	深振业A	2002-12-31	标准无保留意见	1
000006	深振业A	2003-12-31	标准无保留意见	1
000006	深振业A	2004-12-31	标准无保留意见	1
000006	深振业A	2005-12-31	标准无保留意见	1
000006	深振业A	2006-12-31	标准无保留意见	1
000006	深振业A	2007-12-31	标准无保留意见	1
000006	深振业A	2008-12-31	标准无保留意见	1
000006	深振业A	2009-12-31	标准无保留意见	1
000006	深振业A	2010-12-31	标准无保留意见	1
000006	深振业A	2011-12-31	标准无保留意见	1
000006	深振业A	2012-12-31	标准无保留意见	1
000006	深振业A	2013-12-31	标准无保留意见	1
000006	深振业A	2014-12-31	标准无保留意见	1
000006	深振业A	2015-12-31	标准无保留意见	1
000006	深振业A	2016-12-31	标准无保留意见	1
000006	深振业A	2017-12-31	标准无保留意见	1
000006	深振业A	2018-12-31	标准无保留意见	1
000006	深振业A	2019-12-31	标准无保留意见	1
000006	深振业A	2020-12-31	标准无保留意见	1
000006	深振业A	2021-12-31	标准无保留意见	1
000006	深振业A	2022-12-31	标准无保留意见	1
000006	深振业A	2023-12-31	标准无保留意见	1
000007	全新好	1992-12-31	标准无保留意见	1
000007	全新好	1993-12-31	标准无保留意见	1
000007	全新好	1994-12-31	标准无保留意见	1
000007	全新好	1995-12-31	标准无保留意见	1
000007	全新好	1996-12-31	无保留意见加说明段	0
000007	全新好	1997-12-31	保留意见加说明段	0
000007	全新好	1998-12-31	无保留意见加说明段	0
000007	全新好	1999-06-30	无保留意见加说明段	0
000007	全新好	1999-12-31	无保留意见加说明段	0
000007	全新好	2000-12-31	标准无保留意见	1
000007	全新好	2001-12-31	标准无保留意见	1
000007	全新好	2002-12-31	标准无保留意见	1
000007	全新好	2003-12-31	标准无保留意见	1
000007	全新好	2004-12-31	带有解释性说明的无保留意见	0
000007	全新好	2005-12-31	带有解释性说明的无保留意见	0
000007	全新好	2006-12-31	带有解释性说明的无保留意见	0
000007	全新好	2007-12-31	带有解释性说明的无保留意见	0
000007	全新好	2008-12-31	带有解释性说明的无保留意见	0
000007	全新好	2009-12-31	带有解释性说明的无保留意见	0
000007	全新好	2010-12-31	带有解释性说明的无保留意见	0
000007	全新好	2011-12-31	标准无保留意见	1
000007	全新好	2012-12-31	标准无保留意见	1
000007	全新好	2013-12-31	标准无保留意见	1
000007	全新好	2014-12-31	带有解释性说明的无保留意见	0
000007	全新好	2015-12-31	标准无保留意见	1
000007	全新好	2016-12-31	标准无保留意见	1
000007	全新好	2017-12-31	保留意见	0
000007	全新好	2018-12-31	带有解释性说明的无保留意见	0
000007	全新好	2019-12-31	带有解释性说明的无保留意见	0
000007	全新好	2020-12-31	保留意见加事项段	0
000007	全新好	2021-12-31	带有解释性说明的无保留意见	0
000007	全新好	2022-12-31	带有解释性说明的无保留意见	0
000007	全新好	2023-12-31	带有解释性说明的无保留意见	0
000008	神州高铁	1992-12-31	标准无保留意见	1
000008	神州高铁	1993-12-31	标准无保留意见	1
000008	神州高铁	1994-12-31	标准无保留意见	1
000008	神州高铁	1995-12-31	保留意见加说明段	0
000008	神州高铁	1996-12-31	保留意见加说明段	0
000008	神州高铁	1997-12-31	标准无保留意见	1
000008	神州高铁	1998-12-31	保留意见加说明段	0
000008	神州高铁	1999-12-31	保留意见加说明段	0
000008	神州高铁	2000-12-31	保留意见加说明段	0
000008	神州高铁	2001-12-31	保留意见加说明段	0
000008	神州高铁	2002-12-31	无保留意见加说明段	0
000008	神州高铁	2003-12-31	标准无保留意见	1
000008	神州高铁	2004-12-31	标准无保留意见	1
000008	神州高铁	2005-12-31	标准无保留意见	1
000008	神州高铁	2006-12-31	标准无保留意见	1
000008	神州高铁	2007-12-31	标准无保留意见	1
000008	神州高铁	2008-12-31	标准无保留意见	1
000008	神州高铁	2009-12-31	标准无保留意见	1
000008	神州高铁	2010-12-31	标准无保留意见	1
000008	神州高铁	2011-12-31	标准无保留意见	1
000008	神州高铁	2012-12-31	标准无保留意见	1
000008	神州高铁	2013-12-31	标准无保留意见	1
000008	神州高铁	2014-12-31	标准无保留意见	1
000008	神州高铁	2015-12-31	标准无保留意见	1
000008	神州高铁	2016-12-31	标准无保留意见	1
000008	神州高铁	2017-12-31	标准无保留意见	1
000008	神州高铁	2018-12-31	标准无保留意见	1
000008	神州高铁	2019-12-31	标准无保留意见	1
000008	神州高铁	2020-12-31	标准无保留意见	1
000008	神州高铁	2021-12-31	标准无保留意见	1
000008	神州高铁	2022-12-31	标准无保留意见	1
000008	神州高铁	2023-12-31	标准无保留意见	1
000009	中国宝安	1993-12-31	标准无保留意见	1
000009	中国宝安	1994-12-31	标准无保留意见	1
000009	中国宝安	1995-06-30	标准无保留意见	1
000009	中国宝安	1995-12-31	标准无保留意见	1
000009	中国宝安	1996-12-31	标准无保留意见	1
000009	中国宝安	1997-12-31	保留意见	0
000009	中国宝安	1998-12-31	标准无保留意见	1
000009	中国宝安	1999-06-30	标准无保留意见	1
000009	中国宝安	1999-12-31	标准无保留意见	1
000009	中国宝安	2000-12-31	标准无保留意见	1
000009	中国宝安	2001-12-31	标准无保留意见	1
000009	中国宝安	2002-12-31	标准无保留意见	1
000009	中国宝安	2003-12-31	标准无保留意见	1
000009	中国宝安	2004-12-31	标准无保留意见	1
000009	中国宝安	2005-12-31	保留意见加事项段	0
000009	中国宝安	2006-12-31	标准无保留意见	1
000009	中国宝安	2007-12-31	标准无保留意见	1
000009	中国宝安	2008-12-31	标准无保留意见	1
000009	中国宝安	2009-12-31	标准无保留意见	1
000009	中国宝安	2010-12-31	标准无保留意见	1
000009	中国宝安	2011-12-31	标准无保留意见	1
000009	中国宝安	2012-12-31	标准无保留意见	1
000009	中国宝安	2013-12-31	标准无保留意见	1
000009	中国宝安	2014-12-31	标准无保留意见	1
000009	中国宝安	2015-12-31	标准无保留意见	1
000009	中国宝安	2016-12-31	标准无保留意见	1
000009	中国宝安	2017-12-31	标准无保留意见	1
000009	中国宝安	2018-12-31	标准无保留意见	1
000009	中国宝安	2019-12-31	标准无保留意见	1
000009	中国宝安	2020-12-31	标准无保留意见	1
000009	中国宝安	2021-12-31	标准无保留意见	1
000009	中国宝安	2022-12-31	标准无保留意见	1
000009	中国宝安	2023-12-31	标准无保留意见	1
000010	美丽生态	1995-12-31	标准无保留意见	1
000010	美丽生态	1996-12-31	标准无保留意见	1
000010	美丽生态	1997-06-30	标准无保留意见	1
000010	美丽生态	1997-12-31	标准无保留意见	1
000010	美丽生态	1998-12-31	标准无保留意见	1
000010	美丽生态	1999-12-31	标准无保留意见	1
000010	美丽生态	2000-12-31	无保留意见加说明段	0
000010	美丽生态	2001-12-31	标准无保留意见	1
000010	美丽生态	2002-12-31	标准无保留意见	1
000010	美丽生态	2003-12-31	标准无保留意见	1
000010	美丽生态	2004-12-31	标准无保留意见	1
000010	美丽生态	2005-12-31	保留意见加事项段	0
000010	美丽生态	2006-06-30	保留意见	0
000010	美丽生态	2006-12-31	标准无保留意见	1
000010	美丽生态	2007-12-31	标准无保留意见	1
000010	美丽生态	2008-12-31	标准无保留意见	1
000010	美丽生态	2009-12-31	保留意见加事项段	0
000010	美丽生态	2010-12-31	保留意见	0
000010	美丽生态	2011-12-31	标准无保留意见	1
000010	美丽生态	2012-12-31	标准无保留意见	1
000010	美丽生态	2013-12-31	标准无保留意见	1
000010	美丽生态	2014-12-31	标准无保留意见	1
000010	美丽生态	2015-12-31	标准无保留意见	1
000010	美丽生态	2016-12-31	带有解释性说明的无保留意见	0
000010	美丽生态	2017-12-31	带有解释性说明的无保留意见	0
000010	美丽生态	2018-12-31	带有解释性说明的无保留意见	0
000010	美丽生态	2019-12-31	标准无保留意见	1
000010	美丽生态	2020-12-31	标准无保留意见	1
000010	美丽生态	2021-12-31	标准无保留意见	1
000010	美丽生态	2022-12-31	带有解释性说明的无保留意见	0
000010	美丽生态	2023-12-31	带有解释性说明的无保留意见	0
000011	深物业A	1992-12-31	标准无保留意见	1
000011	深物业A	1993-12-31	标准无保留意见	1
000011	深物业A	1994-12-31	标准无保留意见	1
000011	深物业A	1995-12-31	标准无保留意见	1
000011	深物业A	1996-06-30	标准无保留意见	1
000011	深物业A	1996-12-31	标准无保留意见	1
000011	深物业A	1997-12-31	无保留意见加说明段	0
000011	深物业A	1998-12-31	标准无保留意见	1
000011	深物业A	1999-12-31	无保留意见加说明段	0
000011	深物业A	2000-12-31	无保留意见加说明段	0
000011	深物业A	2001-12-31	无保留意见加说明段	0
000011	深物业A	2002-12-31	无保留意见加说明段	0
000011	深物业A	2003-12-31	带有解释性说明的无保留意见	0
000011	深物业A	2004-12-31	带有解释性说明的无保留意见	0
000011	深物业A	2005-12-31	带有解释性说明的无保留意见	0
000011	深物业A	2006-06-30	带有解释性说明的无保留意见	0
000011	深物业A	2006-12-31	保留意见加事项段	0
000011	深物业A	2007-12-31	标准无保留意见	1
000011	深物业A	2008-12-31	标准无保留意见	1
000011	深物业A	2009-12-31	标准无保留意见	1
000011	深物业A	2010-12-31	标准无保留意见	1
000011	深物业A	2011-12-31	标准无保留意见	1
000011	深物业A	2012-12-31	标准无保留意见	1
000011	深物业A	2013-12-31	标准无保留意见	1
000011	深物业A	2014-12-31	标准无保留意见	1
000011	深物业A	2015-12-31	标准无保留意见	1
000011	深物业A	2016-12-31	标准无保留意见	1
000011	深物业A	2017-12-31	标准无保留意见	1
000011	深物业A	2018-12-31	标准无保留意见	1
000011	深物业A	2019-12-31	标准无保留意见	1
000011	深物业A	2020-12-31	标准无保留意见	1
000011	深物业A	2021-12-31	标准无保留意见	1
000011	深物业A	2022-12-31	标准无保留意见	1
000011	深物业A	2023-12-31	标准无保留意见	1
000012	南玻A	1992-12-31	标准无保留意见	1
000012	南玻A	1993-12-31		0
000012	南玻A	1994-12-31	标准无保留意见	1
000012	南玻A	1995-12-31	标准无保留意见	1
000012	南玻A	1996-12-31	标准无保留意见	1
000012	南玻A	1997-12-31	标准无保留意见	1
000012	南玻A	1998-12-31	标准无保留意见	1
000012	南玻A	1999-12-31	标准无保留意见	1
000012	南玻A	2000-12-31	标准无保留意见	1
000012	南玻A	2001-12-31	标准无保留意见	1
000012	南玻A	2002-12-31	标准无保留意见	1
000012	南玻A	2003-12-31	标准无保留意见	1
000012	南玻A	2004-12-31	标准无保留意见	1
000012	南玻A	2005-12-31	标准无保留意见	1
000012	南玻A	2006-12-31	标准无保留意见	1
000012	南玻A	2007-12-31	标准无保留意见	1
000012	南玻A	2008-12-31	标准无保留意见	1
000012	南玻A	2009-12-31	标准无保留意见	1
000012	南玻A	2010-12-31	标准无保留意见	1
000012	南玻A	2011-12-31	标准无保留意见	1
000012	南玻A	2012-12-31	标准无保留意见	1
000012	南玻A	2013-12-31	标准无保留意见	1
000012	南玻A	2014-12-31	标准无保留意见	1
000012	南玻A	2015-12-31	标准无保留意见	1
000012	南玻A	2016-12-31	标准无保留意见	1
000012	南玻A	2017-12-31	标准无保留意见	1
000012	南玻A	2018-12-31	标准无保留意见	1
000012	南玻A	2019-12-31	标准无保留意见	1
000012	南玻A	2020-12-31	标准无保留意见	1
000012	南玻A	2021-12-31	标准无保留意见	1
000012	南玻A	2022-12-31	标准无保留意见	1
000012	南玻A	2023-12-31	标准无保留意见	1
000014	沙河股份	1992-12-31	标准无保留意见	1
000014	沙河股份	1993-12-31	标准无保留意见	1
000014	沙河股份	1994-12-31		0
000014	沙河股份	1995-12-31	保留意见加说明段	0
000014	沙河股份	1996-12-31	保留意见加说明段	0
000014	沙河股份	1997-12-31	保留意见加说明段	0
000014	沙河股份	1998-06-30	保留意见	0
000014	沙河股份	1998-12-31	标准无保留意见	1
000014	沙河股份	1999-06-30	无保留意见加说明段	0
000014	沙河股份	1999-12-31	无保留意见加说明段	0
000014	沙河股份	2000-12-31	保留意见	0
000014	沙河股份	2001-12-31	标准无保留意见	1
000014	沙河股份	2002-06-30	标准无保留意见	1
000014	沙河股份	2002-12-31	标准无保留意见	1
000014	沙河股份	2003-06-30	标准无保留意见	1
000014	沙河股份	2003-12-31	标准无保留意见	1
000014	沙河股份	2004-12-31	标准无保留意见	1
000014	沙河股份	2005-12-31	标准无保留意见	1
000014	沙河股份	2006-12-31	标准无保留意见	1
000014	沙河股份	2007-12-31	标准无保留意见	1
000014	沙河股份	2008-12-31	标准无保留意见	1
000014	沙河股份	2009-12-31	标准无保留意见	1
000014	沙河股份	2010-12-31	标准无保留意见	1
000014	沙河股份	2011-12-31	标准无保留意见	1
000014	沙河股份	2012-12-31	标准无保留意见	1
000014	沙河股份	2013-12-31	标准无保留意见	1
000014	沙河股份	2014-12-31	标准无保留意见	1
000014	沙河股份	2015-12-31	标准无保留意见	1
000014	沙河股份	2016-12-31	标准无保留意见	1
000014	沙河股份	2017-12-31	标准无保留意见	1
000014	沙河股份	2018-12-31	标准无保留意见	1
000014	沙河股份	2019-12-31	标准无保留意见	1
000014	沙河股份	2020-12-31	标准无保留意见	1
000014	沙河股份	2021-12-31	标准无保留意见	1
000014	沙河股份	2022-12-31	标准无保留意见	1
000014	沙河股份	2023-12-31	标准无保留意见	1
000016	深康佳A	1992-12-31	标准无保留意见	1
000016	深康佳A	1993-12-31	标准无保留意见	1
000016	深康佳A	1994-12-31	标准无保留意见	1
000016	深康佳A	1995-12-31	标准无保留意见	1
000016	深康佳A	1996-12-31	标准无保留意见	1
000016	深康佳A	1997-12-31	标准无保留意见	1
000016	深康佳A	1998-12-31	标准无保留意见	1
000016	深康佳A	1999-06-30	标准无保留意见	1
000016	深康佳A	1999-12-31	标准无保留意见	1
000016	深康佳A	2000-12-31	标准无保留意见	1
000016	深康佳A	2001-12-31	标准无保留意见	1
000016	深康佳A	2002-12-31	无保留意见加说明段	0
000016	深康佳A	2003-12-31	标准无保留意见	1
000016	深康佳A	2004-12-31	标准无保留意见	1
000016	深康佳A	2005-12-31	标准无保留意见	1
000016	深康佳A	2006-12-31	标准无保留意见	1
000016	深康佳A	2007-12-31	标准无保留意见	1
000016	深康佳A	2008-12-31	标准无保留意见	1
000016	深康佳A	2009-12-31	标准无保留意见	1
000016	深康佳A	2010-12-31	标准无保留意见	1
000016	深康佳A	2011-12-31	标准无保留意见	1
000016	深康佳A	2012-12-31	标准无保留意见	1
000016	深康佳A	2013-12-31	标准无保留意见	1
000016	深康佳A	2014-12-31	标准无保留意见	1
000016	深康佳A	2015-12-31	标准无保留意见	1
000016	深康佳A	2016-12-31	标准无保留意见	1
000016	深康佳A	2017-12-31	标准无保留意见	1
000016	深康佳A	2018-12-31	标准无保留意见	1
000016	深康佳A	2019-12-31	标准无保留意见	1
000016	深康佳A	2020-12-31	标准无保留意见	1
000016	深康佳A	2021-12-31	标准无保留意见	1
000016	深康佳A	2022-12-31	标准无保留意见	1
000016	深康佳A	2023-12-31	标准无保留意见	1
000017	深中华A	1992-12-31		0
000017	深中华A	1993-12-31	标准无保留意见	1
000017	深中华A	1994-12-31	标准无保留意见	1
000017	深中华A	1995-12-31	标准无保留意见	1
000017	深中华A	1996-12-31	标准无保留意见	1
000017	深中华A	1997-12-31	标准无保留意见	1
000017	深中华A	1998-12-31	保留意见加说明段	0
000017	深中华A	1999-06-30	保留意见加说明段	0
000017	深中华A	1999-12-31	保留意见加说明段	0
000017	深中华A	2000-12-31	保留意见	0
000017	深中华A	2001-12-31	无保留意见加说明段	0
000017	深中华A	2002-12-31	标准无保留意见	1
000017	深中华A	2003-12-31	标准无保留意见	1
000017	深中华A	2004-12-31	带有解释性说明的无保留意见	0
000017	深中华A	2005-12-31	保留意见	0
000017	深中华A	2006-12-31	保留意见加事项段	0
000017	深中华A	2007-12-31	无法表示意见	0
000017	深中华A	2008-12-31	无法表示意见	0
000017	深中华A	2009-12-31	无法表示意见	0
000017	深中华A	2010-12-31	无法表示意见	0
000017	深中华A	2011-12-31	无法表示意见	0
000017	深中华A	2012-12-31	无法表示意见	0
000017	深中华A	2013-12-31	带有解释性说明的无保留意见	0
000017	深中华A	2014-12-31	带有解释性说明的无保留意见	0
000017	深中华A	2015-12-31	带有解释性说明的无保留意见	0
000017	深中华A	2016-12-31	带有解释性说明的无保留意见	0
000017	深中华A	2017-12-31	带有解释性说明的无保留意见	0
000017	深中华A	2018-12-31	带有解释性说明的无保留意见	0
000017	深中华A	2019-12-31	带有解释性说明的无保留意见	0
000017	深中华A	2020-12-31	带有解释性说明的无保留意见	0
000017	深中华A	2021-12-31	带有解释性说明的无保留意见	0
000017	深中华A	2022-12-31	标准无保留意见	1
000017	深中华A	2023-12-31	标准无保留意见	1
000018	神城A退	1992-12-31	标准无保留意见	1
000018	神城A退	1993-12-31	标准无保留意见	1
000018	神城A退	1994-12-31	标准无保留意见	1
000018	神城A退	1995-12-31	标准无保留意见	1
000018	神城A退	1996-12-31	标准无保留意见	1
000018	神城A退	1997-12-31	标准无保留意见	1
000018	神城A退	1998-12-31	标准无保留意见	1
000018	神城A退	1999-12-31	标准无保留意见	1
000018	神城A退	2000-12-31	标准无保留意见	1
000018	神城A退	2001-12-31	标准无保留意见	1
000018	神城A退	2002-12-31	标准无保留意见	1
000018	神城A退	2003-12-31	标准无保留意见	1
000018	神城A退	2004-12-31	标准无保留意见	1
000018	神城A退	2005-12-31	标准无保留意见	1
000018	神城A退	2006-12-31	标准无保留意见	1
000018	神城A退	2007-12-31	带有解释性说明的无保留意见	0
000018	神城A退	2008-12-31	带有解释性说明的无保留意见	0
000018	神城A退	2009-12-31	带有解释性说明的无保留意见	0
000018	神城A退	2010-12-31	带有解释性说明的无保留意见	0
000018	神城A退	2011-12-31	带有解释性说明的无保留意见	0
000018	神城A退	2012-12-31	带有解释性说明的无保留意见	0
000018	神城A退	2013-12-31	带有解释性说明的无保留意见	0
000018	神城A退	2014-12-31	带有解释性说明的无保留意见	0
000018	神城A退	2015-12-31	标准无保留意见	1
000018	神城A退	2016-12-31	标准无保留意见	1
000018	神城A退	2017-12-31	标准无保留意见	1
000018	神城A退	2018-12-31	无法表示意见	0
000019	深粮控股	1992-12-31		0
000019	深粮控股	1993-12-31		0
000019	深粮控股	1994-12-31	标准无保留意见	1
000019	深粮控股	1995-12-31	保留意见加说明段	0
000019	深粮控股	1996-12-31	标准无保留意见	1
000019	深粮控股	1997-12-31	标准无保留意见	1
000019	深粮控股	1998-12-31	标准无保留意见	1
000019	深粮控股	1999-06-30	标准无保留意见	1
000019	深粮控股	1999-12-31	无保留意见加说明段	0
000019	深粮控股	2000-12-31	标准无保留意见	1
000019	深粮控股	2001-12-31	标准无保留意见	1
000019	深粮控股	2002-12-31	标准无保留意见	1
000019	深粮控股	2003-12-31	标准无保留意见	1
000019	深粮控股	2004-12-31	标准无保留意见	1
000019	深粮控股	2005-12-31	标准无保留意见	1
000019	深粮控股	2006-12-31	标准无保留意见	1
000019	深粮控股	2007-12-31	标准无保留意见	1
000019	深粮控股	2008-12-31	标准无保留意见	1
000019	深粮控股	2009-12-31	标准无保留意见	1
000019	深粮控股	2010-12-31	标准无保留意见	1
000019	深粮控股	2011-12-31	标准无保留意见	1
000019	深粮控股	2012-12-31	标准无保留意见	1
000019	深粮控股	2013-12-31	标准无保留意见	1
000019	深粮控股	2014-12-31	标准无保留意见	1
000019	深粮控股	2015-12-31	标准无保留意见	1
000019	深粮控股	2016-12-31	标准无保留意见	1
000019	深粮控股	2017-12-31	标准无保留意见	1
000019	深粮控股	2018-12-31	标准无保留意见	1
000019	深粮控股	2019-12-31	标准无保留意见	1
000019	深粮控股	2020-12-31	标准无保留意见	1
000019	深粮控股	2021-12-31	标准无保留意见	1
000019	深粮控股	2022-12-31	标准无保留意见	1
000019	深粮控股	2023-12-31	标准无保留意见	1
000020	深华发A	1992-12-31	标准无保留意见	1
000020	深华发A	1993-12-31	标准无保留意见	1
000020	深华发A	1994-12-31	标准无保留意见	1
000020	深华发A	1995-12-31	标准无保留意见	1
000020	深华发A	1996-12-31	标准无保留意见	1
000020	深华发A	1997-12-31	标准无保留意见	1
000020	深华发A	1998-12-31	标准无保留意见	1
000020	深华发A	1999-06-30	标准无保留意见	1
000020	深华发A	1999-12-31	标准无保留意见	1
000020	深华发A	2000-12-31	标准无保留意见	1
000020	深华发A	2001-12-31	标准无保留意见	1
000020	深华发A	2002-12-31	标准无保留意见	1
000020	深华发A	2003-12-31	标准无保留意见	1
000020	深华发A	2004-12-31	标准无保留意见	1
000020	深华发A	2005-12-31	标准无保留意见	1
000020	深华发A	2006-12-31	标准无保留意见	1
000020	深华发A	2007-12-31	标准无保留意见	1
000020	深华发A	2008-12-31	标准无保留意见	1
000020	深华发A	2009-12-31	标准无保留意见	1
000020	深华发A	2010-12-31	标准无保留意见	1
000020	深华发A	2011-12-31	标准无保留意见	1
000020	深华发A	2012-12-31	标准无保留意见	1
000020	深华发A	2013-12-31	标准无保留意见	1
000020	深华发A	2014-12-31	标准无保留意见	1
000020	深华发A	2015-12-31	保留意见	0
000020	深华发A	2016-12-31	标准无保留意见	1
000020	深华发A	2017-12-31	标准无保留意见	1
000020	深华发A	2018-12-31	标准无保留意见	1
000020	深华发A	2019-12-31	标准无保留意见	1
000020	深华发A	2020-12-31	标准无保留意见	1
000020	深华发A	2021-12-31	标准无保留意见	1
000020	深华发A	2022-12-31	标准无保留意见	1
000020	深华发A	2023-12-31	标准无保留意见	1
000021	深科技	1994-12-31	标准无保留意见	1
000021	深科技	1995-12-31	标准无保留意见	1
000021	深科技	1996-12-31	标准无保留意见	1
000021	深科技	1997-12-31	标准无保留意见	1
000021	深科技	1998-12-31	标准无保留意见	1
000021	深科技	1999-12-31	标准无保留意见	1
000021	深科技	2000-12-31	标准无保留意见	1
000021	深科技	2001-12-31	标准无保留意见	1
000021	深科技	2002-12-31	标准无保留意见	1
000021	深科技	2003-12-31	标准无保留意见	1
000021	深科技	2004-12-31	标准无保留意见	1
000021	深科技	2005-12-31	标准无保留意见	1
000021	深科技	2006-12-31	标准无保留意见	1
000021	深科技	2007-06-30	标准无保留意见	1
000021	深科技	2007-12-31	标准无保留意见	1
000021	深科技	2008-12-31	标准无保留意见	1
000021	深科技	2009-12-31	标准无保留意见	1
000021	深科技	2010-12-31	标准无保留意见	1
000021	深科技	2011-12-31	标准无保留意见	1
000021	深科技	2012-12-31	标准无保留意见	1
000021	深科技	2013-12-31	标准无保留意见	1
000021	深科技	2014-12-31	标准无保留意见	1
000021	深科技	2015-12-31	标准无保留意见	1
000021	深科技	2016-12-31	标准无保留意见	1
000021	深科技	2017-12-31	标准无保留意见	1
000021	深科技	2018-12-31	标准无保留意见	1
000021	深科技	2019-12-31	标准无保留意见	1
000021	深科技	2020-12-31	标准无保留意见	1
000021	深科技	2021-12-31	标准无保留意见	1
000021	深科技	2022-12-31	标准无保留意见	1
000021	深科技	2023-12-31	标准无保留意见	1
000022	深赤湾A	1993-12-31	标准无保留意见	1
000022	深赤湾A	1994-12-31	标准无保留意见	1
000022	深赤湾A	1995-12-31	标准无保留意见	1
000022	深赤湾A	1996-12-31	标准无保留意见	1
000022	深赤湾A	1997-12-31	标准无保留意见	1
000022	深赤湾A	1998-12-31	标准无保留意见	1
000022	深赤湾A	1999-06-30	标准无保留意见	1
000022	深赤湾A	1999-12-31	标准无保留意见	1
000022	深赤湾A	2000-06-30	标准无保留意见	1
000022	深赤湾A	2000-12-31	标准无保留意见	1
000022	深赤湾A	2001-06-30	标准无保留意见	1
000022	深赤湾A	2001-12-31	标准无保留意见	1
000022	深赤湾A	2002-12-31	标准无保留意见	1
000022	深赤湾A	2003-12-31	标准无保留意见	1
000022	深赤湾A	2004-12-31	标准无保留意见	1
000022	深赤湾A	2005-12-31	标准无保留意见	1
000022	深赤湾A	2006-12-31	标准无保留意见	1
000022	深赤湾A	2007-12-31	标准无保留意见	1
000022	深赤湾A	2008-12-31	标准无保留意见	1
000022	深赤湾A	2009-12-31	标准无保留意见	1
000022	深赤湾A	2010-12-31	标准无保留意见	1
000022	深赤湾A	2011-12-31	标准无保留意见	1
000022	深赤湾A	2012-12-31	标准无保留意见	1
000022	深赤湾A	2013-12-31	标准无保留意见	1
000022	深赤湾A	2014-12-31	标准无保留意见	1
000022	深赤湾A	2015-12-31	标准无保留意见	1
000022	深赤湾A	2016-12-31	标准无保留意见	1
000022	深赤湾A	2017-12-31	标准无保留意见	1
000024	招商地产	1993-12-31		0
000024	招商地产	1994-12-31	标准无保留意见	1
000024	招商地产	1995-12-31	标准无保留意见	1
000024	招商地产	1996-12-31	无保留意见加说明段	0
000024	招商地产	1997-12-31	无保留意见加说明段	0
000024	招商地产	1998-12-31	标准无保留意见	1
000024	招商地产	1999-06-30	标准无保留意见	1
000024	招商地产	1999-12-31	保留意见加说明段	0
000024	招商地产	2000-12-31	标准无保留意见	1
000024	招商地产	2001-06-30	标准无保留意见	1
000024	招商地产	2001-12-31	标准无保留意见	1
000024	招商地产	2002-12-31	标准无保留意见	1
000024	招商地产	2003-12-31	标准无保留意见	1
000024	招商地产	2004-06-30	标准无保留意见	1
000024	招商地产	2004-12-31	标准无保留意见	1
000024	招商地产	2005-12-31	标准无保留意见	1
000024	招商地产	2006-12-31	标准无保留意见	1
000024	招商地产	2007-12-31	标准无保留意见	1
000024	招商地产	2008-12-31	标准无保留意见	1
000024	招商地产	2009-12-31	标准无保留意见	1
000024	招商地产	2010-12-31	标准无保留意见	1
000024	招商地产	2011-12-31	标准无保留意见	1
000024	招商地产	2012-12-31	标准无保留意见	1
000024	招商地产	2013-12-31	标准无保留意见	1
000024	招商地产	2014-12-31	标准无保留意见	1
000025	特力A	1993-12-31	标准无保留意见	1
000025	特力A	1994-12-31	标准无保留意见	1
000025	特力A	1995-12-31	标准无保留意见	1
000025	特力A	1996-12-31	标准无保留意见	1
000025	特力A	1997-12-31	标准无保留意见	1
000025	特力A	1998-12-31	标准无保留意见	1
000025	特力A	1999-12-31	保留意见加说明段	0
000025	特力A	2000-06-30	无保留意见加说明段	0
000025	特力A	2000-12-31	保留意见加说明段	0
000025	特力A	2001-12-31	标准无保留意见	1
000025	特力A	2002-12-31	标准无保留意见	1
000025	特力A	2003-12-31	标准无保留意见	1
000025	特力A	2004-12-31	标准无保留意见	1
000025	特力A	2005-12-31	标准无保留意见	1
000025	特力A	2006-12-31	标准无保留意见	1
000025	特力A	2007-12-31	标准无保留意见	1
000025	特力A	2008-12-31	标准无保留意见	1
000025	特力A	2009-12-31	标准无保留意见	1
000025	特力A	2010-12-31	标准无保留意见	1
000025	特力A	2011-12-31	带有解释性说明的无保留意见	0
000025	特力A	2012-12-31	标准无保留意见	1
000025	特力A	2013-12-31	标准无保留意见	1
000025	特力A	2014-12-31	标准无保留意见	1
000025	特力A	2015-12-31	标准无保留意见	1
000025	特力A	2016-12-31	标准无保留意见	1
000025	特力A	2017-12-31	标准无保留意见	1
000025	特力A	2018-12-31	标准无保留意见	1
000025	特力A	2019-12-31	标准无保留意见	1
000025	特力A	2020-12-31	标准无保留意见	1
000025	特力A	2021-12-31	标准无保留意见	1
000025	特力A	2022-12-31	标准无保留意见	1
000025	特力A	2023-12-31	标准无保留意见	1
000026	飞亚达	1993-12-31	标准无保留意见	1
000026	飞亚达	1994-12-31	标准无保留意见	1
000026	飞亚达	1995-06-30		0
000026	飞亚达	1995-12-31	标准无保留意见	1
000026	飞亚达	1996-12-31	标准无保留意见	1
000026	飞亚达	1997-06-30	标准无保留意见	1
000026	飞亚达	1997-12-31	标准无保留意见	1
000026	飞亚达	1998-12-31	标准无保留意见	1
000026	飞亚达	1999-12-31	标准无保留意见	1
000026	飞亚达	2000-12-31	标准无保留意见	1
000026	飞亚达	2001-12-31	标准无保留意见	1
000026	飞亚达	2002-12-31	标准无保留意见	1
000026	飞亚达	2003-12-31	标准无保留意见	1
000026	飞亚达	2004-12-31	标准无保留意见	1
000026	飞亚达	2005-12-31	标准无保留意见	1
000026	飞亚达	2006-12-31	标准无保留意见	1
000026	飞亚达	2007-12-31	标准无保留意见	1
000026	飞亚达	2008-12-31	标准无保留意见	1
000026	飞亚达	2009-12-31	标准无保留意见	1
000026	飞亚达	2010-12-31	标准无保留意见	1
000026	飞亚达	2011-12-31	标准无保留意见	1
000026	飞亚达	2012-12-31	标准无保留意见	1
000026	飞亚达	2013-12-31	标准无保留意见	1
000026	飞亚达	2014-12-31	标准无保留意见	1
000026	飞亚达	2015-12-31	标准无保留意见	1
000026	飞亚达	2016-12-31	标准无保留意见	1
000026	飞亚达	2017-12-31	标准无保留意见	1
000026	飞亚达	2018-12-31	标准无保留意见	1
000026	飞亚达	2019-12-31	标准无保留意见	1
000026	飞亚达	2020-12-31	标准无保留意见	1
000026	飞亚达	2021-12-31	标准无保留意见	1
000026	飞亚达	2022-12-31	标准无保留意见	1
000026	飞亚达	2023-12-31	标准无保留意见	1
000027	深圳能源	1993-12-31	无保留意见加说明段	0
000027	深圳能源	1994-12-31	保留意见加说明段	0
000027	深圳能源	1995-12-31	标准无保留意见	1
000027	深圳能源	1996-12-31	无保留意见加说明段	0
000027	深圳能源	1997-06-30	无保留意见加说明段	0
000027	深圳能源	1997-12-31	无保留意见加说明段	0
000027	深圳能源	1998-06-30	无保留意见加说明段	0
000027	深圳能源	1998-12-31	无保留意见加说明段	0
000027	深圳能源	1999-12-31	标准无保留意见	1
000027	深圳能源	2000-12-31	标准无保留意见	1
000027	深圳能源	2001-12-31	标准无保留意见	1
000027	深圳能源	2002-12-31	标准无保留意见	1
000027	深圳能源	2003-12-31	标准无保留意见	1
000027	深圳能源	2004-12-31	标准无保留意见	1
000027	深圳能源	2005-12-31	标准无保留意见	1
000027	深圳能源	2006-12-31	标准无保留意见	1
000027	深圳能源	2007-12-31	标准无保留意见	1
000027	深圳能源	2008-12-31	标准无保留意见	1
000027	深圳能源	2009-12-31	标准无保留意见	1
000027	深圳能源	2010-12-31	标准无保留意见	1
000027	深圳能源	2011-12-31	标准无保留意见	1
000027	深圳能源	2012-12-31	标准无保留意见	1
000027	深圳能源	2013-12-31	标准无保留意见	1
000027	深圳能源	2014-12-31	标准无保留意见	1
000027	深圳能源	2015-12-31	标准无保留意见	1
000027	深圳能源	2016-12-31	标准无保留意见	1
000027	深圳能源	2017-12-31	标准无保留意见	1
000027	深圳能源	2018-12-31	标准无保留意见	1
000027	深圳能源	2019-12-31	标准无保留意见	1
000027	深圳能源	2020-12-31	标准无保留意见	1
000027	深圳能源	2021-12-31	标准无保留意见	1
000027	深圳能源	2022-12-31	标准无保留意见	1
000027	深圳能源	2023-12-31	标准无保留意见	1
000028	国药一致	1993-12-31	标准无保留意见	1
000028	国药一致	1994-12-31	标准无保留意见	1
000028	国药一致	1995-12-31	标准无保留意见	1
000028	国药一致	1996-12-31	标准无保留意见	1
000028	国药一致	1997-12-31	标准无保留意见	1
000028	国药一致	1998-12-31	标准无保留意见	1
000028	国药一致	1999-12-31	标准无保留意见	1
000028	国药一致	2000-06-30	标准无保留意见	1
000028	国药一致	2000-12-31	保留意见加说明段	0
000028	国药一致	2001-06-30	标准无保留意见	1
000028	国药一致	2001-12-31	标准无保留意见	1
000028	国药一致	2002-12-31	标准无保留意见	1
000028	国药一致	2003-12-31	标准无保留意见	1
000028	国药一致	2004-12-31	标准无保留意见	1
000028	国药一致	2005-12-31	标准无保留意见	1
000028	国药一致	2006-12-31	标准无保留意见	1
000028	国药一致	2007-12-31	标准无保留意见	1
000028	国药一致	2008-12-31	标准无保留意见	1
000028	国药一致	2009-12-31	标准无保留意见	1
000028	国药一致	2010-12-31	标准无保留意见	1
000028	国药一致	2011-12-31	标准无保留意见	1
000028	国药一致	2012-12-31	标准无保留意见	1
000028	国药一致	2013-12-31	标准无保留意见	1
000028	国药一致	2014-12-31	标准无保留意见	1
000028	国药一致	2015-12-31	标准无保留意见	1
000028	国药一致	2016-12-31	标准无保留意见	1
000028	国药一致	2017-12-31	标准无保留意见	1
000028	国药一致	2018-12-31	标准无保留意见	1
000028	国药一致	2019-12-31	标准无保留意见	1
000028	国药一致	2020-12-31	标准无保留意见	1
000028	国药一致	2021-12-31	标准无保留意见	1
000028	国药一致	2022-12-31	标准无保留意见	1
000028	国药一致	2023-12-31	标准无保留意见	1
000029	深深房A	1993-12-31	标准无保留意见	1
000029	深深房A	1994-12-31	标准无保留意见	1
000029	深深房A	1995-12-31	标准无保留意见	1
000029	深深房A	1996-12-31	标准无保留意见	1
000029	深深房A	1997-12-31	标准无保留意见	1
000029	深深房A	1998-12-31	无保留意见加说明段	0
000029	深深房A	1999-12-31	标准无保留意见	1
000029	深深房A	2000-12-31	标准无保留意见	1
000029	深深房A	2001-12-31	标准无保留意见	1
000029	深深房A	2002-12-31	标准无保留意见	1
000029	深深房A	2003-12-31	标准无保留意见	1
000029	深深房A	2004-12-31	标准无保留意见	1
000029	深深房A	2005-12-31	标准无保留意见	1
000029	深深房A	2006-12-31	标准无保留意见	1
000029	深深房A	2007-12-31	标准无保留意见	1
000029	深深房A	2008-12-31	标准无保留意见	1
000029	深深房A	2009-12-31	标准无保留意见	1
000029	深深房A	2010-12-31	标准无保留意见	1
000029	深深房A	2011-12-31	标准无保留意见	1
000029	深深房A	2012-12-31	标准无保留意见	1
000029	深深房A	2013-12-31	标准无保留意见	1
000029	深深房A	2014-12-31	标准无保留意见	1
000029	深深房A	2015-12-31	标准无保留意见	1
000029	深深房A	2016-12-31	标准无保留意见	1
000029	深深房A	2017-12-31	标准无保留意见	1
000029	深深房A	2018-12-31	标准无保留意见	1
000029	深深房A	2019-12-31	标准无保留意见	1
000029	深深房A	2020-12-31	标准无保留意见	1
000029	深深房A	2021-12-31	标准无保留意见	1
000029	深深房A	2022-12-31	标准无保留意见	1
000029	深深房A	2023-12-31	标准无保留意见	1
000030	富奥股份	1993-12-31	标准无保留意见	1
000030	富奥股份	1994-12-31	保留意见加说明段	0
000030	富奥股份	1995-06-30		0
000030	富奥股份	1995-12-31	保留意见	0
000030	富奥股份	1996-12-31	保留意见加说明段	0
000030	富奥股份	1997-12-31	保留意见加说明段	0
000030	富奥股份	1998-06-30	保留意见	0
000030	富奥股份	1998-12-31	保留意见加说明段	0
000030	富奥股份	1999-06-30	保留意见	0
000030	富奥股份	1999-12-31	保留意见加说明段	0
000030	富奥股份	2000-12-31	保留意见加说明段	0
000030	富奥股份	2001-12-31	无保留意见加说明段	0
000030	富奥股份	2002-12-31	保留意见	0
000030	富奥股份	2003-12-31	带有解释性说明的无保留意见	0
000030	富奥股份	2004-12-31	带有解释性说明的无保留意见	0
000030	富奥股份	2005-12-31	无法表示意见	0
000030	富奥股份	2006-12-31	无法表示意见	0
000030	富奥股份	2007-12-31	无法表示意见	0
000030	富奥股份	2008-12-31	无法表示意见	0
000030	富奥股份	2009-12-31	无法表示意见	0
000030	富奥股份	2010-12-31	带有解释性说明的无保留意见	0
000030	富奥股份	2011-12-31	带有解释性说明的无保留意见	0
000030	富奥股份	2012-12-31	带有解释性说明的无保留意见	0
000030	富奥股份	2013-12-31	标准无保留意见	1
000030	富奥股份	2014-12-31	标准无保留意见	1
000030	富奥股份	2015-12-31	标准无保留意见	1
000030	富奥股份	2016-12-31	标准无保留意见	1
000030	富奥股份	2017-12-31	标准无保留意见	1
000030	富奥股份	2018-12-31	标准无保留意见	1
000030	富奥股份	2019-12-31	标准无保留意见	1
000030	富奥股份	2020-12-31	标准无保留意见	1
000030	富奥股份	2021-12-31	标准无保留意见	1
000030	富奥股份	2022-12-31	标准无保留意见	1
000030	富奥股份	2023-12-31	标准无保留意见	1
000031	大悦城	1993-12-31	无保留意见加说明段	0
000031	大悦城	1994-12-31	标准无保留意见	1
000031	大悦城	1995-12-31	标准无保留意见	1
000031	大悦城	1996-12-31	标准无保留意见	1
000031	大悦城	1997-12-31	保留意见加说明段	0
000031	大悦城	1998-12-31	保留意见加说明段	0
000031	大悦城	1999-12-31	无保留意见加说明段	0
000031	大悦城	2000-12-31	无保留意见加说明段	0
000031	大悦城	2001-12-31	无保留意见加说明段	0
000031	大悦城	2002-12-31	无保留意见加说明段	0
000031	大悦城	2003-12-31	标准无保留意见	1
000031	大悦城	2004-06-30	标准无保留意见	1
000031	大悦城	2004-12-31	标准无保留意见	1
000031	大悦城	2005-12-31	标准无保留意见	1
000031	大悦城	2006-12-31	标准无保留意见	1
000031	大悦城	2007-12-31	标准无保留意见	1
000031	大悦城	2008-12-31	标准无保留意见	1
000031	大悦城	2009-06-30	标准无保留意见	1
000031	大悦城	2009-12-31	标准无保留意见	1
000031	大悦城	2010-12-31	标准无保留意见	1
000031	大悦城	2011-12-31	标准无保留意见	1
000031	大悦城	2012-12-31	标准无保留意见	1
000031	大悦城	2013-12-31	标准无保留意见	1
000031	大悦城	2014-12-31	标准无保留意见	1
000031	大悦城	2015-12-31	标准无保留意见	1
000031	大悦城	2016-12-31	标准无保留意见	1
000031	大悦城	2017-12-31	标准无保留意见	1
000031	大悦城	2018-12-31	标准无保留意见	1
000031	大悦城	2019-12-31	标准无保留意见	1
000031	大悦城	2020-12-31	标准无保留意见	1
000031	大悦城	2021-12-31	标准无保留意见	1
000031	大悦城	2022-12-31	标准无保留意见	1
000031	大悦城	2023-12-31	标准无保留意见	1
000032	深桑达A	1993-12-31	标准无保留意见	1
000032	深桑达A	1994-12-31	标准无保留意见	1
000032	深桑达A	1995-12-31	标准无保留意见	1
000032	深桑达A	1996-12-31	标准无保留意见	1
000032	深桑达A	1997-12-31	标准无保留意见	1
000032	深桑达A	1998-12-31	标准无保留意见	1
000032	深桑达A	1999-12-31	标准无保留意见	1
000032	深桑达A	2000-12-31	标准无保留意见	1
000032	深桑达A	2001-12-31	标准无保留意见	1
000032	深桑达A	2002-12-31	标准无保留意见	1
000032	深桑达A	2003-12-31	标准无保留意见	1
000032	深桑达A	2004-12-31	标准无保留意见	1
000032	深桑达A	2005-12-31	标准无保留意见	1
000032	深桑达A	2006-12-31	标准无保留意见	1
000032	深桑达A	2007-12-31	标准无保留意见	1
000032	深桑达A	2008-12-31	标准无保留意见	1
000032	深桑达A	2009-12-31	标准无保留意见	1
000032	深桑达A	2010-12-31	标准无保留意见	1
000032	深桑达A	2011-12-31	标准无保留意见	1
000032	深桑达A	2012-12-31	标准无保留意见	1
000032	深桑达A	2013-12-31	标准无保留意见	1
000032	深桑达A	2014-12-31	标准无保留意见	1
000032	深桑达A	2015-12-31	标准无保留意见	1
000032	深桑达A	2016-12-31	标准无保留意见	1
000032	深桑达A	2017-12-31	标准无保留意见	1
000032	深桑达A	2018-12-31	标准无保留意见	1
000032	深桑达A	2019-12-31	标准无保留意见	1
000032	深桑达A	2020-12-31	标准无保留意见	1
000032	深桑达A	2021-12-31	标准无保留意见	1
000032	深桑达A	2022-12-31	标准无保留意见	1
000032	深桑达A	2023-12-31	标准无保留意见	1
000033	新都退	1994-12-31	标准无保留意见	1
000033	新都退	1995-12-31	标准无保留意见	1
000033	新都退	1996-12-31	标准无保留意见	1
000033	新都退	1997-12-31	标准无保留意见	1
000033	新都退	1998-12-31	标准无保留意见	1
000033	新都退	1999-12-31	标准无保留意见	1
000033	新都退	2000-12-31	保留意见加说明段	0
000033	新都退	2001-12-31	标准无保留意见	1
000033	新都退	2002-12-31	标准无保留意见	1
000033	新都退	2003-12-31	标准无保留意见	1
000033	新都退	2004-12-31	标准无保留意见	1
000033	新都退	2005-12-31	保留意见	0
000033	新都退	2006-12-31	带有解释性说明的无保留意见	0
000033	新都退	2007-12-31	带有解释性说明的无保留意见	0
000033	新都退	2008-12-31	标准无保留意见	1
000033	新都退	2009-12-31	标准无保留意见	1
000033	新都退	2010-12-31	标准无保留意见	1
000033	新都退	2011-12-31	标准无保留意见	1
000033	新都退	2012-12-31	带有解释性说明的无保留意见	0
000033	新都退	2013-12-31	无法表示意见	0
000033	新都退	2014-12-31	无法表示意见	0
000033	新都退	2015-12-31	带有解释性说明的无保留意见	0
000033	新都退	2016-12-31	带有解释性说明的无保留意见	0
000034	神州数码	1994-12-31	标准无保留意见	1
000034	神州数码	1995-12-31	标准无保留意见	1
000034	神州数码	1996-06-30	标准无保留意见	1
000034	神州数码	1996-12-31	标准无保留意见	1
000034	神州数码	1997-12-31	无保留意见加说明段	0
000034	神州数码	1998-12-31	保留意见加说明段	0
000034	神州数码	1999-06-30	保留意见	0
000034	神州数码	1999-12-31	标准无保留意见	1
000034	神州数码	2000-12-31	标准无保留意见	1
000034	神州数码	2001-06-30	标准无保留意见	1
000034	神州数码	2001-12-31	标准无保留意见	1
000034	神州数码	2002-12-31	标准无保留意见	1
000034	神州数码	2003-12-31	标准无保留意见	1
000034	神州数码	2004-06-30	保留意见加事项段	0
000034	神州数码	2004-12-31	无法表示意见	0
000034	神州数码	2005-12-31	保留意见加事项段	0
000034	神州数码	2006-12-31	带有解释性说明的无保留意见	0
000034	神州数码	2007-12-31	带有解释性说明的无保留意见	0
000034	神州数码	2008-12-31	带有解释性说明的无保留意见	0
000034	神州数码	2009-12-31	带有解释性说明的无保留意见	0
000034	神州数码	2010-12-31	标准无保留意见	1
000034	神州数码	2011-12-31	标准无保留意见	1
000034	神州数码	2012-12-31	标准无保留意见	1
000034	神州数码	2013-12-31	标准无保留意见	1
000034	神州数码	2014-12-31	标准无保留意见	1
000034	神州数码	2015-12-31	标准无保留意见	1
000034	神州数码	2016-12-31	标准无保留意见	1
000034	神州数码	2017-12-31	标准无保留意见	1
000034	神州数码	2018-12-31	标准无保留意见	1
000034	神州数码	2019-12-31	标准无保留意见	1
000034	神州数码	2020-12-31	标准无保留意见	1
000034	神州数码	2021-12-31	标准无保留意见	1
000034	神州数码	2022-12-31	标准无保留意见	1
000034	神州数码	2023-12-31	标准无保留意见	1
000035	中国天楹	1994-12-31	标准无保留意见	1
000035	中国天楹	1995-12-31	标准无保留意见	1
000035	中国天楹	1996-12-31	标准无保留意见	1
000035	中国天楹	1997-06-30	标准无保留意见	1
000035	中国天楹	1997-12-31	标准无保留意见	1
000035	中国天楹	1998-12-31	标准无保留意见	1
000035	中国天楹	1999-12-31	标准无保留意见	1
000035	中国天楹	2000-06-30	标准无保留意见	1
000035	中国天楹	2000-12-31	标准无保留意见	1
000035	中国天楹	2001-12-31	无保留意见加说明段	0
000035	中国天楹	2002-12-31	无保留意见加说明段	0
000035	中国天楹	2003-12-31	带有解释性说明的无保留意见	0
000035	中国天楹	2004-12-31	无法表示意见	0
000035	中国天楹	2005-12-31	无法表示意见	0
000035	中国天楹	2006-12-31	带有解释性说明的无保留意见	0
000035	中国天楹	2007-12-31	带有解释性说明的无保留意见	0
000035	中国天楹	2008-12-31	无法表示意见	0
000035	中国天楹	2009-12-31	无法表示意见	0
000035	中国天楹	2010-12-31	无法表示意见	0
000035	中国天楹	2011-12-31	无法表示意见	0
000035	中国天楹	2012-12-31	带有解释性说明的无保留意见	0
000035	中国天楹	2013-12-31	带有解释性说明的无保留意见	0
000035	中国天楹	2014-12-31	标准无保留意见	1
000035	中国天楹	2015-12-31	标准无保留意见	1
000035	中国天楹	2016-12-31	标准无保留意见	1
000035	中国天楹	2017-12-31	标准无保留意见	1
000035	中国天楹	2018-12-31	标准无保留意见	1
000035	中国天楹	2019-12-31	标准无保留意见	1
000035	中国天楹	2020-12-31	标准无保留意见	1
000035	中国天楹	2021-12-31	标准无保留意见	1
000035	中国天楹	2022-12-31	标准无保留意见	1
000035	中国天楹	2023-12-31	标准无保留意见	1
000036	华联控股	1994-12-31	标准无保留意见	1
000036	华联控股	1995-12-31	标准无保留意见	1
000036	华联控股	1996-12-31	标准无保留意见	1
000036	华联控股	1997-12-31	标准无保留意见	1
000036	华联控股	1998-12-31	标准无保留意见	1
000036	华联控股	1999-12-31	标准无保留意见	1
000036	华联控股	2000-06-30	标准无保留意见	1
000036	华联控股	2000-12-31	标准无保留意见	1
000036	华联控股	2001-12-31	标准无保留意见	1
000036	华联控股	2002-12-31	标准无保留意见	1
000036	华联控股	2003-12-31	标准无保留意见	1
000036	华联控股	2004-12-31	标准无保留意见	1
000036	华联控股	2005-12-31	标准无保留意见	1
000036	华联控股	2006-12-31	标准无保留意见	1
000036	华联控股	2007-12-31	标准无保留意见	1
000036	华联控股	2008-12-31	标准无保留意见	1
000036	华联控股	2009-12-31	标准无保留意见	1
000036	华联控股	2010-12-31	标准无保留意见	1
000036	华联控股	2011-12-31	标准无保留意见	1
000036	华联控股	2012-12-31	标准无保留意见	1
000036	华联控股	2013-12-31	标准无保留意见	1
000036	华联控股	2014-12-31	标准无保留意见	1
000036	华联控股	2015-12-31	标准无保留意见	1
000036	华联控股	2016-12-31	标准无保留意见	1
000036	华联控股	2017-12-31	标准无保留意见	1
000036	华联控股	2018-12-31	标准无保留意见	1
000036	华联控股	2019-12-31	标准无保留意见	1
000036	华联控股	2020-12-31	标准无保留意见	1
000036	华联控股	2021-12-31	标准无保留意见	1
000036	华联控股	2022-12-31	标准无保留意见	1
000036	华联控股	2023-12-31	标准无保留意见	1
000037	深南电A	1994-12-31	标准无保留意见	1
000037	深南电A	1995-12-31	标准无保留意见	1
000037	深南电A	1996-12-31	标准无保留意见	1
000037	深南电A	1997-06-30	标准无保留意见	1
000037	深南电A	1997-12-31	标准无保留意见	1
000037	深南电A	1998-12-31	标准无保留意见	1
000037	深南电A	1999-12-31	标准无保留意见	1
000037	深南电A	2000-06-30	标准无保留意见	1
000037	深南电A	2000-12-31	标准无保留意见	1
000037	深南电A	2001-12-31	标准无保留意见	1
000037	深南电A	2002-12-31	标准无保留意见	1
000037	深南电A	2003-06-30	标准无保留意见	1
000037	深南电A	2003-12-31	标准无保留意见	1
000037	深南电A	2004-12-31	标准无保留意见	1
000037	深南电A	2005-12-31	标准无保留意见	1
000037	深南电A	2006-12-31	标准无保留意见	1
000037	深南电A	2007-12-31	标准无保留意见	1
000037	深南电A	2008-12-31	带有解释性说明的无保留意见	0
000037	深南电A	2009-12-31	带有解释性说明的无保留意见	0
000037	深南电A	2010-12-31	带有解释性说明的无保留意见	0
000037	深南电A	2011-12-31	带有解释性说明的无保留意见	0
000037	深南电A	2012-12-31	带有解释性说明的无保留意见	0
000037	深南电A	2013-12-31	带有解释性说明的无保留意见	0
000037	深南电A	2014-12-31	标准无保留意见	1
000037	深南电A	2015-12-31	标准无保留意见	1
000037	深南电A	2016-12-31	标准无保留意见	1
000037	深南电A	2017-12-31	标准无保留意见	1
000037	深南电A	2018-12-31	标准无保留意见	1
000037	深南电A	2019-12-31	标准无保留意见	1
000037	深南电A	2020-12-31	标准无保留意见	1
000037	深南电A	2021-12-31	标准无保留意见	1
000037	深南电A	2022-12-31	标准无保留意见	1
000037	深南电A	2023-12-31	标准无保留意见	1
000038	大通退	1994-12-31	标准无保留意见	1
000038	大通退	1995-06-30		0
000038	大通退	1995-12-31	标准无保留意见	1
000038	大通退	1996-12-31	标准无保留意见	1
000038	大通退	1997-12-31	标准无保留意见	1
000038	大通退	1998-12-31	标准无保留意见	1
000038	大通退	1999-12-31	标准无保留意见	1
000038	大通退	2000-12-31	无保留意见加说明段	0
000038	大通退	2001-12-31	标准无保留意见	1
000038	大通退	2002-12-31	标准无保留意见	1
000038	大通退	2003-12-31	标准无保留意见	1
000038	大通退	2004-12-31	标准无保留意见	1
000038	大通退	2005-12-31	带有解释性说明的无保留意见	0
000038	大通退	2006-12-31	无法表示意见	0
000038	大通退	2007-12-31	带有解释性说明的无保留意见	0
000038	大通退	2008-12-31	标准无保留意见	1
000038	大通退	2009-06-30	标准无保留意见	1
000038	大通退	2009-12-31	标准无保留意见	1
000038	大通退	2010-06-30	标准无保留意见	1
000038	大通退	2010-12-31	标准无保留意见	1
000038	大通退	2011-12-31	标准无保留意见	1
000038	大通退	2012-12-31	标准无保留意见	1
000038	大通退	2013-12-31	标准无保留意见	1
000038	大通退	2014-12-31	标准无保留意见	1
000038	大通退	2015-12-31	标准无保留意见	1
000038	大通退	2016-12-31	标准无保留意见	1
000038	大通退	2017-12-31	标准无保留意见	1
000038	大通退	2018-12-31	保留意见	0
000038	大通退	2019-12-31	标准无保留意见	1
000038	大通退	2020-12-31	带有解释性说明的无保留意见	0
000038	大通退	2021-12-31	无法表示意见	0
000039	中集集团	1994-12-31	标准无保留意见	1
000039	中集集团	1995-12-31	标准无保留意见	1
000039	中集集团	1996-12-31	标准无保留意见	1
000039	中集集团	1997-12-31	标准无保留意见	1
000039	中集集团	1998-12-31	标准无保留意见	1
000039	中集集团	1999-12-31	标准无保留意见	1
000039	中集集团	2000-12-31	标准无保留意见	1
000039	中集集团	2001-12-31	无保留意见加说明段	0
000039	中集集团	2002-06-30	标准无保留意见	1
000039	中集集团	2002-12-31	标准无保留意见	1
000039	中集集团	2003-06-30	标准无保留意见	1
000039	中集集团	2003-12-31	标准无保留意见	1
000039	中集集团	2004-12-31	标准无保留意见	1
000039	中集集团	2005-12-31	标准无保留意见	1
000039	中集集团	2006-12-31	标准无保留意见	1
000039	中集集团	2007-12-31	标准无保留意见	1
000039	中集集团	2008-12-31	标准无保留意见	1
000039	中集集团	2009-12-31	标准无保留意见	1
000039	中集集团	2010-12-31	标准无保留意见	1
000039	中集集团	2011-12-31	标准无保留意见	1
000039	中集集团	2012-12-31	标准无保留意见	1
000039	中集集团	2013-12-31	标准无保留意见	1
000039	中集集团	2014-12-31	标准无保留意见	1
000039	中集集团	2015-12-31	标准无保留意见	1
000039	中集集团	2016-12-31	标准无保留意见	1
000039	中集集团	2017-12-31	标准无保留意见	1
000039	中集集团	2018-12-31	标准无保留意见	1
000039	中集集团	2019-12-31	标准无保留意见	1
000039	中集集团	2020-12-31	标准无保留意见	1
000039	中集集团	2021-12-31	标准无保留意见	1
000039	中集集团	2022-12-31	标准无保留意见	1
000039	中集集团	2023-12-31	标准无保留意见	1
000042	中洲控股	1994-12-31	标准无保留意见	1
000042	中洲控股	1995-12-31	标准无保留意见	1
000042	中洲控股	1996-12-31	标准无保留意见	1
000042	中洲控股	1997-12-31	标准无保留意见	1
000042	中洲控股	1998-12-31	标准无保留意见	1
000042	中洲控股	1999-12-31	无保留意见加说明段	0
000042	中洲控股	2000-12-31	标准无保留意见	1
000042	中洲控股	2001-06-30	标准无保留意见	1
000042	中洲控股	2001-12-31	标准无保留意见	1
000042	中洲控股	2002-06-30	标准无保留意见	1
000042	中洲控股	2002-12-31	标准无保留意见	1
000042	中洲控股	2003-12-31	标准无保留意见	1
000042	中洲控股	2004-12-31	标准无保留意见	1
000042	中洲控股	2005-12-31	标准无保留意见	1
000042	中洲控股	2006-06-30	标准无保留意见	1
000042	中洲控股	2006-12-31	标准无保留意见	1
000042	中洲控股	2007-12-31	标准无保留意见	1
000042	中洲控股	2008-12-31	标准无保留意见	1
000042	中洲控股	2009-12-31	标准无保留意见	1
000042	中洲控股	2010-12-31	标准无保留意见	1
000042	中洲控股	2011-12-31	标准无保留意见	1
000042	中洲控股	2012-12-31	标准无保留意见	1
000042	中洲控股	2013-12-31	标准无保留意见	1
000042	中洲控股	2014-12-31	标准无保留意见	1
000042	中洲控股	2015-12-31	标准无保留意见	1
000042	中洲控股	2016-12-31	标准无保留意见	1
000042	中洲控股	2017-12-31	标准无保留意见	1
000042	中洲控股	2018-12-31	标准无保留意见	1
000042	中洲控股	2019-12-31	标准无保留意见	1
000042	中洲控股	2020-12-31	标准无保留意见	1
000042	中洲控股	2021-12-31	标准无保留意见	1
000042	中洲控股	2022-12-31	标准无保留意见	1
000042	中洲控股	2023-12-31	标准无保留意见	1
000043	中航善达	1994-12-31		0
000043	中航善达	1995-12-31	标准无保留意见	1
000043	中航善达	1996-12-31	标准无保留意见	1
000043	中航善达	1997-12-31	标准无保留意见	1
000043	中航善达	1998-12-31	标准无保留意见	1
000043	中航善达	1999-12-31	标准无保留意见	1
000043	中航善达	2000-12-31	标准无保留意见	1
000043	中航善达	2001-12-31	标准无保留意见	1
000043	中航善达	2002-12-31	标准无保留意见	1
000043	中航善达	2003-12-31	标准无保留意见	1
000043	中航善达	2004-12-31	标准无保留意见	1
000043	中航善达	2005-12-31	标准无保留意见	1
000043	中航善达	2006-12-31	标准无保留意见	1
000043	中航善达	2007-12-31	标准无保留意见	1
000043	中航善达	2008-12-31	标准无保留意见	1
000043	中航善达	2009-12-31	标准无保留意见	1
000043	中航善达	2010-12-31	标准无保留意见	1
000043	中航善达	2011-12-31	标准无保留意见	1
000043	中航善达	2012-12-31	标准无保留意见	1
000043	中航善达	2013-12-31	标准无保留意见	1
000043	中航善达	2014-12-31	标准无保留意见	1
000043	中航善达	2015-12-31	标准无保留意见	1
000043	中航善达	2016-12-31	标准无保留意见	1
000043	中航善达	2017-12-31	标准无保留意见	1
000043	中航善达	2018-12-31	标准无保留意见	1
000045	深纺织A	1994-12-31	标准无保留意见	1
000045	深纺织A	1995-12-31	标准无保留意见	1
000045	深纺织A	1996-12-31	标准无保留意见	1
000045	深纺织A	1997-12-31	标准无保留意见	1
000045	深纺织A	1998-12-31	无保留意见加说明段	0
000045	深纺织A	1999-12-31	无保留意见加说明段	0
000045	深纺织A	2000-12-31	无保留意见加说明段	0
000045	深纺织A	2001-12-31	保留意见	0
000045	深纺织A	2002-12-31	标准无保留意见	1
000045	深纺织A	2003-12-31	标准无保留意见	1
000045	深纺织A	2004-12-31	标准无保留意见	1
000045	深纺织A	2005-12-31	标准无保留意见	1
000045	深纺织A	2006-12-31	标准无保留意见	1
000045	深纺织A	2007-12-31	标准无保留意见	1
000045	深纺织A	2008-12-31	标准无保留意见	1
000045	深纺织A	2009-12-31	标准无保留意见	1
000045	深纺织A	2010-12-31	标准无保留意见	1
000045	深纺织A	2011-12-31	标准无保留意见	1
000045	深纺织A	2012-12-31	标准无保留意见	1
000045	深纺织A	2013-12-31	标准无保留意见	1
000045	深纺织A	2014-12-31	标准无保留意见	1
000045	深纺织A	2015-12-31	标准无保留意见	1
000045	深纺织A	2016-12-31	标准无保留意见	1
000045	深纺织A	2017-12-31	标准无保留意见	1
000045	深纺织A	2018-12-31	标准无保留意见	1
000045	深纺织A	2019-12-31	标准无保留意见	1
000045	深纺织A	2020-12-31	标准无保留意见	1
000045	深纺织A	2021-12-31	标准无保留意见	1
000045	深纺织A	2022-12-31	标准无保留意见	1
000045	深纺织A	2023-12-31	标准无保留意见	1
000048	京基智农	1994-12-31	标准无保留意见	1
000048	京基智农	1995-12-31	标准无保留意见	1
000048	京基智农	1996-06-30		0
000048	京基智农	1996-12-31	标准无保留意见	1
000048	京基智农	1997-12-31	标准无保留意见	1
000048	京基智农	1998-06-30	标准无保留意见	1
000048	京基智农	1998-12-31	标准无保留意见	1
000048	京基智农	1999-12-31	标准无保留意见	1
000048	京基智农	2000-12-31	保留意见加说明段	0
000048	京基智农	2001-12-31	无保留意见加说明段	0
000048	京基智农	2002-12-31	无保留意见加说明段	0
000048	京基智农	2003-12-31	标准无保留意见	1
000048	京基智农	2004-12-31	标准无保留意见	1
000048	京基智农	2005-12-31	标准无保留意见	1
000048	京基智农	2006-12-31	标准无保留意见	1
000048	京基智农	2007-12-31	标准无保留意见	1
000048	京基智农	2008-12-31	标准无保留意见	1
000048	京基智农	2009-12-31	标准无保留意见	1
000048	京基智农	2010-12-31	标准无保留意见	1
000048	京基智农	2011-12-31	标准无保留意见	1
000048	京基智农	2012-12-31	保留意见	0
000048	京基智农	2013-12-31	保留意见	0
000048	京基智农	2014-12-31	带有解释性说明的无保留意见	0
000048	京基智农	2015-12-31	标准无保留意见	1
000048	京基智农	2016-12-31	标准无保留意见	1
000048	京基智农	2017-12-31	无法表示意见	0
000048	京基智农	2018-12-31	保留意见	0
000048	京基智农	2019-12-31	标准无保留意见	1
000048	京基智农	2020-12-31	标准无保留意见	1
000048	京基智农	2021-12-31	标准无保留意见	1
000048	京基智农	2022-12-31	标准无保留意见	1
000048	京基智农	2023-12-31	标准无保留意见	1
000049	德赛电池	1995-12-31	标准无保留意见	1
000049	德赛电池	1996-12-31	拒绝发表意见	0
000049	德赛电池	1997-12-31	保留意见加说明段	0
000049	德赛电池	1998-06-30	保留意见	0
000049	德赛电池	1998-12-31	标准无保留意见	1
000049	德赛电池	1999-12-31	无保留意见加说明段	0
000049	德赛电池	2000-12-31	无保留意见加说明段	0
000049	德赛电池	2001-12-31	标准无保留意见	1
000049	德赛电池	2002-12-31	标准无保留意见	1
000049	德赛电池	2003-12-31	标准无保留意见	1
000049	德赛电池	2004-12-31	标准无保留意见	1
000049	德赛电池	2005-12-31	标准无保留意见	1
000049	德赛电池	2006-12-31	标准无保留意见	1
000049	德赛电池	2007-12-31	标准无保留意见	1
000049	德赛电池	2008-12-31	标准无保留意见	1
000049	德赛电池	2009-12-31	标准无保留意见	1
000049	德赛电池	2010-12-31	带有解释性说明的无保留意见	0
000049	德赛电池	2011-12-31	标准无保留意见	1
000049	德赛电池	2012-12-31	标准无保留意见	1
000049	德赛电池	2013-12-31	标准无保留意见	1
000049	德赛电池	2014-12-31	标准无保留意见	1
000049	德赛电池	2015-12-31	标准无保留意见	1
000049	德赛电池	2016-12-31	标准无保留意见	1
000049	德赛电池	2017-12-31	标准无保留意见	1
000049	德赛电池	2018-12-31	标准无保留意见	1
000049	德赛电池	2019-12-31	标准无保留意见	1
000049	德赛电池	2020-12-31	标准无保留意见	1
000049	德赛电池	2021-12-31	标准无保留意见	1
000049	德赛电池	2022-12-31	标准无保留意见	1
000049	德赛电池	2023-12-31	标准无保留意见	1
000050	深天马A	1995-12-31	标准无保留意见	1
000050	深天马A	1996-12-31	标准无保留意见	1
000050	深天马A	1997-06-30	标准无保留意见	1
000050	深天马A	1997-12-31	标准无保留意见	1
000050	深天马A	1998-12-31	标准无保留意见	1
000050	深天马A	1999-12-31	标准无保留意见	1
000050	深天马A	2000-06-30	标准无保留意见	1
000050	深天马A	2000-12-31	标准无保留意见	1
000050	深天马A	2001-12-31	标准无保留意见	1
000050	深天马A	2002-12-31	标准无保留意见	1
000050	深天马A	2003-12-31	标准无保留意见	1
000050	深天马A	2004-12-31	标准无保留意见	1
000050	深天马A	2005-12-31	标准无保留意见	1
000050	深天马A	2006-12-31	标准无保留意见	1
000050	深天马A	2007-12-31	标准无保留意见	1
000050	深天马A	2008-06-30	标准无保留意见	1
000050	深天马A	2008-12-31	标准无保留意见	1
000050	深天马A	2009-12-31	标准无保留意见	1
000050	深天马A	2010-12-31	标准无保留意见	1
000050	深天马A	2011-12-31	标准无保留意见	1
000050	深天马A	2012-12-31	标准无保留意见	1
000050	深天马A	2013-12-31	标准无保留意见	1
000050	深天马A	2014-12-31	标准无保留意见	1
000050	深天马A	2015-12-31	标准无保留意见	1
000050	深天马A	2016-12-31	标准无保留意见	1
000050	深天马A	2017-12-31	标准无保留意见	1
000050	深天马A	2018-12-31	标准无保留意见	1
000050	深天马A	2019-12-31	标准无保留意见	1
000050	深天马A	2020-12-31	标准无保留意见	1
000050	深天马A	2021-12-31	标准无保留意见	1
000050	深天马A	2022-12-31	标准无保留意见	1
000050	深天马A	2023-12-31	标准无保留意见	1
000055	方大集团	1996-12-31	标准无保留意见	1
000055	方大集团	1997-12-31	标准无保留意见	1
000055	方大集团	1998-06-30	标准无保留意见	1
000055	方大集团	1998-12-31	标准无保留意见	1
000055	方大集团	1999-12-31	标准无保留意见	1
000055	方大集团	2000-12-31	标准无保留意见	1
000055	方大集团	2001-06-30	标准无保留意见	1
000055	方大集团	2001-12-31	标准无保留意见	1
000055	方大集团	2002-12-31	标准无保留意见	1
000055	方大集团	2003-12-31	标准无保留意见	1
000055	方大集团	2004-12-31	带有解释性说明的无保留意见	0
000055	方大集团	2005-12-31	标准无保留意见	1
000055	方大集团	2006-12-31	标准无保留意见	1
000055	方大集团	2007-12-31	标准无保留意见	1
000055	方大集团	2008-12-31	标准无保留意见	1
000055	方大集团	2009-12-31	标准无保留意见	1
000055	方大集团	2010-12-31	标准无保留意见	1
000055	方大集团	2011-12-31	标准无保留意见	1
000055	方大集团	2012-12-31	标准无保留意见	1
000055	方大集团	2013-12-31	标准无保留意见	1
000055	方大集团	2014-12-31	标准无保留意见	1
000055	方大集团	2015-12-31	标准无保留意见	1
000055	方大集团	2016-12-31	标准无保留意见	1
000055	方大集团	2017-12-31	标准无保留意见	1
000055	方大集团	2018-12-31	标准无保留意见	1
000055	方大集团	2019-12-31	标准无保留意见	1
000055	方大集团	2020-12-31	标准无保留意见	1
000055	方大集团	2021-12-31	标准无保留意见	1
000055	方大集团	2022-12-31	标准无保留意见	1
000055	方大集团	2023-12-31	标准无保留意见	1
000056	皇庭国际	1995-12-31	标准无保留意见	1
000056	皇庭国际	1996-12-31	标准无保留意见	1
000056	皇庭国际	1997-12-31	标准无保留意见	1
000056	皇庭国际	1998-12-31	标准无保留意见	1
000056	皇庭国际	1999-12-31	标准无保留意见	1
000056	皇庭国际	2000-12-31	标准无保留意见	1
000056	皇庭国际	2001-12-31	标准无保留意见	1
000056	皇庭国际	2002-12-31	标准无保留意见	1
000056	皇庭国际	2003-12-31	标准无保留意见	1
000056	皇庭国际	2004-12-31	带有解释性说明的无保留意见	0
000056	皇庭国际	2005-12-31	标准无保留意见	1
000056	皇庭国际	2006-12-31	标准无保留意见	1
000056	皇庭国际	2007-12-31	标准无保留意见	1
000056	皇庭国际	2008-12-31	标准无保留意见	1
000056	皇庭国际	2009-12-31	带有解释性说明的无保留意见	0
000056	皇庭国际	2010-12-31	保留意见加事项段	0
000056	皇庭国际	2011-12-31	保留意见加事项段	0
000056	皇庭国际	2012-12-31	带有解释性说明的无保留意见	0
000056	皇庭国际	2013-12-31	标准无保留意见	1
000056	皇庭国际	2014-12-31	标准无保留意见	1
000056	皇庭国际	2015-12-31	标准无保留意见	1
000056	皇庭国际	2016-12-31	标准无保留意见	1
000056	皇庭国际	2017-12-31	标准无保留意见	1
000056	皇庭国际	2018-12-31	标准无保留意见	1
000056	皇庭国际	2019-12-31	标准无保留意见	1
000056	皇庭国际	2020-12-31	标准无保留意见	1
000056	皇庭国际	2021-12-31	带有解释性说明的无保留意见	0
000056	皇庭国际	2022-12-31	保留意见	0
000056	皇庭国际	2023-12-31	保留意见	0
000058	深赛格	1996-12-31	标准无保留意见	1
000058	深赛格	1997-12-31	标准无保留意见	1
000058	深赛格	1998-12-31	标准无保留意见	1
000058	深赛格	1999-12-31	标准无保留意见	1
000058	深赛格	2000-12-31	保留意见	0
000058	深赛格	2001-12-31	无保留意见加说明段	0
000058	深赛格	2002-12-31	标准无保留意见	1
000058	深赛格	2003-12-31	标准无保留意见	1
000058	深赛格	2004-12-31	标准无保留意见	1
000058	深赛格	2005-12-31	标准无保留意见	1
000058	深赛格	2006-12-31	标准无保留意见	1
000058	深赛格	2007-12-31	标准无保留意见	1
000058	深赛格	2008-12-31	标准无保留意见	1
000058	深赛格	2009-12-31	标准无保留意见	1
000058	深赛格	2010-12-31	标准无保留意见	1
000058	深赛格	2011-12-31	标准无保留意见	1
000058	深赛格	2012-12-31	标准无保留意见	1
000058	深赛格	2013-12-31	标准无保留意见	1
000058	深赛格	2014-12-31	标准无保留意见	1
000058	深赛格	2015-12-31	标准无保留意见	1
000058	深赛格	2016-12-31	标准无保留意见	1
000058	深赛格	2017-12-31	标准无保留意见	1
000058	深赛格	2018-12-31	标准无保留意见	1
000058	深赛格	2019-12-31	标准无保留意见	1
000058	深赛格	2020-12-31	标准无保留意见	1
000058	深赛格	2021-12-31	标准无保留意见	1
000058	深赛格	2022-12-31	标准无保留意见	1
000058	深赛格	2023-12-31	标准无保留意见	1
000059	华锦股份	1997-12-31	标准无保留意见	1
000059	华锦股份	1998-12-31	无保留意见加说明段	0
000059	华锦股份	1999-12-31	标准无保留意见	1
000059	华锦股份	2000-12-31	标准无保留意见	1
000059	华锦股份	2001-12-31	标准无保留意见	1
000059	华锦股份	2002-12-31	标准无保留意见	1
000059	华锦股份	2003-12-31	标准无保留意见	1
000059	华锦股份	2004-12-31	标准无保留意见	1
000059	华锦股份	2005-12-31	标准无保留意见	1
000059	华锦股份	2006-12-31	标准无保留意见	1
000059	华锦股份	2007-12-31	标准无保留意见	1
000059	华锦股份	2008-12-31	标准无保留意见	1
000059	华锦股份	2009-12-31	标准无保留意见	1
000059	华锦股份	2010-12-31	标准无保留意见	1
000059	华锦股份	2011-12-31	标准无保留意见	1
000059	华锦股份	2012-12-31	标准无保留意见	1
000059	华锦股份	2013-12-31	标准无保留意见	1
000059	华锦股份	2014-12-31	标准无保留意见	1
000059	华锦股份	2015-12-31	标准无保留意见	1
000059	华锦股份	2016-12-31	标准无保留意见	1
000059	华锦股份	2017-12-31	标准无保留意见	1
000059	华锦股份	2018-12-31	标准无保留意见	1
000059	华锦股份	2019-12-31	标准无保留意见	1
000059	华锦股份	2020-12-31	标准无保留意见	1
000059	华锦股份	2021-12-31	标准无保留意见	1
000059	华锦股份	2022-12-31	标准无保留意见	1
000059	华锦股份	2023-12-31	标准无保留意见	1
000060	中金岭南	1997-12-31	标准无保留意见	1
000060	中金岭南	1998-12-31	标准无保留意见	1
000060	中金岭南	1999-12-31	标准无保留意见	1
000060	中金岭南	2000-12-31	标准无保留意见	1
000060	中金岭南	2001-06-30	标准无保留意见	1
000060	中金岭南	2001-12-31	标准无保留意见	1
000060	中金岭南	2002-12-31	标准无保留意见	1
000060	中金岭南	2003-12-31	标准无保留意见	1
000060	中金岭南	2004-12-31	标准无保留意见	1
000060	中金岭南	2005-12-31	标准无保留意见	1
000060	中金岭南	2006-12-31	标准无保留意见	1
000060	中金岭南	2007-12-31	标准无保留意见	1
000060	中金岭南	2008-12-31	标准无保留意见	1
000060	中金岭南	2009-12-31	标准无保留意见	1
000060	中金岭南	2010-12-31	标准无保留意见	1
000060	中金岭南	2011-12-31	标准无保留意见	1
000060	中金岭南	2012-12-31	标准无保留意见	1
000060	中金岭南	2013-12-31	标准无保留意见	1
000060	中金岭南	2014-12-31	标准无保留意见	1
000060	中金岭南	2015-12-31	标准无保留意见	1
000060	中金岭南	2016-12-31	标准无保留意见	1
000060	中金岭南	2017-12-31	标准无保留意见	1
000060	中金岭南	2018-12-31	标准无保留意见	1
000060	中金岭南	2019-12-31	标准无保留意见	1
000060	中金岭南	2020-12-31	标准无保留意见	1
000060	中金岭南	2021-12-31	标准无保留意见	1
000060	中金岭南	2022-12-31	标准无保留意见	1
000060	中金岭南	2023-12-31	标准无保留意见	1
000061	农产品	1997-12-31	标准无保留意见	1
000061	农产品	1998-12-31	标准无保留意见	1
000061	农产品	1999-12-31	标准无保留意见	1
000061	农产品	2000-12-31	标准无保留意见	1
000061	农产品	2001-12-31	标准无保留意见	1
000061	农产品	2002-06-30	标准无保留意见	1
000061	农产品	2002-12-31	标准无保留意见	1
000061	农产品	2003-06-30	标准无保留意见	1
000061	农产品	2003-12-31	标准无保留意见	1
000061	农产品	2004-12-31	标准无保留意见	1
000061	农产品	2005-12-31	标准无保留意见	1
000061	农产品	2006-12-31	标准无保留意见	1
000061	农产品	2007-12-31	标准无保留意见	1
000061	农产品	2008-12-31	带有解释性说明的无保留意见	0
000061	农产品	2009-12-31	带有解释性说明的无保留意见	0
000061	农产品	2010-12-31	标准无保留意见	1
000061	农产品	2011-12-31	标准无保留意见	1
000061	农产品	2012-12-31	标准无保留意见	1
000061	农产品	2013-12-31	标准无保留意见	1
000061	农产品	2014-12-31	标准无保留意见	1
000061	农产品	2015-12-31	标准无保留意见	1
000061	农产品	2016-12-31	标准无保留意见	1
000061	农产品	2017-12-31	标准无保留意见	1
000061	农产品	2018-12-31	标准无保留意见	1
000061	农产品	2019-12-31	标准无保留意见	1
000061	农产品	2020-12-31	标准无保留意见	1
000061	农产品	2021-12-31	标准无保留意见	1
000061	农产品	2022-12-31	标准无保留意见	1
000061	农产品	2023-12-31	标准无保留意见	1
000062	深圳华强	1997-12-31	标准无保留意见	1
000062	深圳华强	1998-06-30	标准无保留意见	1
000062	深圳华强	1998-12-31	标准无保留意见	1
000062	深圳华强	1999-12-31	标准无保留意见	1
000062	深圳华强	2000-06-30	标准无保留意见	1
000062	深圳华强	2000-12-31	标准无保留意见	1
000062	深圳华强	2001-12-31	无保留意见加说明段	0
000062	深圳华强	2002-12-31	无保留意见加说明段	0
000062	深圳华强	2003-12-31	标准无保留意见	1
000062	深圳华强	2004-12-31	标准无保留意见	1
000062	深圳华强	2005-12-31	标准无保留意见	1
000062	深圳华强	2006-12-31	标准无保留意见	1
000062	深圳华强	2007-12-31	标准无保留意见	1
000062	深圳华强	2008-12-31	标准无保留意见	1
000062	深圳华强	2009-12-31	标准无保留意见	1
000062	深圳华强	2010-12-31	标准无保留意见	1
000062	深圳华强	2011-12-31	标准无保留意见	1
000062	深圳华强	2012-12-31	标准无保留意见	1
000062	深圳华强	2013-12-31	标准无保留意见	1
000062	深圳华强	2014-12-31	标准无保留意见	1
000062	深圳华强	2015-12-31	标准无保留意见	1
000062	深圳华强	2016-12-31	标准无保留意见	1
000062	深圳华强	2017-12-31	标准无保留意见	1
000062	深圳华强	2018-12-31	标准无保留意见	1
000062	深圳华强	2019-12-31	标准无保留意见	1
000062	深圳华强	2020-12-31	标准无保留意见	1
000062	深圳华强	2021-12-31	标准无保留意见	1
000062	深圳华强	2022-12-31	标准无保留意见	1
000062	深圳华强	2023-12-31	标准无保留意见	1
000063	中兴通讯	1997-12-31	标准无保留意见	1
000063	中兴通讯	1998-06-30	标准无保留意见	1
000063	中兴通讯	1998-12-31	标准无保留意见	1
000063	中兴通讯	1999-12-31	标准无保留意见	1
000063	中兴通讯	2000-06-30	标准无保留意见	1
000063	中兴通讯	2000-12-31	标准无保留意见	1
000063	中兴通讯	2001-06-30	标准无保留意见	1
000063	中兴通讯	2001-12-31	标准无保留意见	1
000063	中兴通讯	2002-12-31	标准无保留意见	1
000063	中兴通讯	2003-12-31	标准无保留意见	1
000063	中兴通讯	2004-12-31	标准无保留意见	1
000063	中兴通讯	2005-12-31	标准无保留意见	1
000063	中兴通讯	2006-12-31	标准无保留意见	1
000063	中兴通讯	2007-12-31	标准无保留意见	1
000063	中兴通讯	2008-12-31	标准无保留意见	1
000063	中兴通讯	2009-12-31	标准无保留意见	1
000063	中兴通讯	2010-12-31	标准无保留意见	1
000063	中兴通讯	2011-12-31	标准无保留意见	1
000063	中兴通讯	2012-12-31	标准无保留意见	1
000063	中兴通讯	2013-12-31	标准无保留意见	1
000063	中兴通讯	2014-12-31	标准无保留意见	1
000063	中兴通讯	2015-12-31	标准无保留意见	1
000063	中兴通讯	2016-12-31	标准无保留意见	1
000063	中兴通讯	2017-12-31	标准无保留意见	1
000063	中兴通讯	2018-12-31	标准无保留意见	1
000063	中兴通讯	2019-12-31	标准无保留意见	1
000063	中兴通讯	2020-12-31	标准无保留意见	1
000063	中兴通讯	2021-12-31	标准无保留意见	1
000063	中兴通讯	2022-12-31	标准无保留意见	1
000063	中兴通讯	2023-12-31	标准无保留意见	1
000065	北方国际	1998-12-31	标准无保留意见	1
000065	北方国际	1999-12-31	标准无保留意见	1
000065	北方国际	2000-06-30	标准无保留意见	1
000065	北方国际	2000-12-31	标准无保留意见	1
000065	北方国际	2001-12-31	标准无保留意见	1
000065	北方国际	2002-06-30	标准无保留意见	1
000065	北方国际	2002-12-31	标准无保留意见	1
000065	北方国际	2003-12-31	标准无保留意见	1
000065	北方国际	2004-12-31	标准无保留意见	1
000065	北方国际	2005-12-31	标准无保留意见	1
000065	北方国际	2006-12-31	标准无保留意见	1
000065	北方国际	2007-12-31	标准无保留意见	1
000065	北方国际	2008-12-31	标准无保留意见	1
000065	北方国际	2009-12-31	标准无保留意见	1
000065	北方国际	2010-12-31	标准无保留意见	1
000065	北方国际	2011-12-31	标准无保留意见	1
000065	北方国际	2012-12-31	标准无保留意见	1
000065	北方国际	2013-12-31	标准无保留意见	1
000065	北方国际	2014-12-31	标准无保留意见	1
000065	北方国际	2015-12-31	标准无保留意见	1
000065	北方国际	2016-12-31	标准无保留意见	1
000065	北方国际	2017-12-31	标准无保留意见	1
000065	北方国际	2018-12-31	标准无保留意见	1
000065	北方国际	2019-12-31	标准无保留意见	1
000065	北方国际	2020-12-31	标准无保留意见	1
000065	北方国际	2021-12-31	标准无保留意见	1
000065	北方国际	2022-12-31	标准无保留意见	1
000065	北方国际	2023-12-31	标准无保留意见	1
000066	中国长城	1997-12-31	标准无保留意见	1
000066	中国长城	1998-12-31	标准无保留意见	1
000066	中国长城	1999-06-30	标准无保留意见	1
000066	中国长城	1999-12-31	标准无保留意见	1
000066	中国长城	2000-12-31	标准无保留意见	1
000066	中国长城	2001-12-31	标准无保留意见	1
000066	中国长城	2002-12-31	标准无保留意见	1
000066	中国长城	2003-12-31	标准无保留意见	1
000066	中国长城	2004-12-31	标准无保留意见	1
000066	中国长城	2005-12-31	标准无保留意见	1
000066	中国长城	2006-12-31	标准无保留意见	1
000066	中国长城	2007-06-30	标准无保留意见	1
000066	中国长城	2007-12-31	标准无保留意见	1
000066	中国长城	2008-12-31	标准无保留意见	1
000066	中国长城	2009-12-31	标准无保留意见	1
000066	中国长城	2010-12-31	标准无保留意见	1
000066	中国长城	2011-12-31	标准无保留意见	1
000066	中国长城	2012-12-31	标准无保留意见	1
000066	中国长城	2013-12-31	标准无保留意见	1
000066	中国长城	2014-12-31	标准无保留意见	1
000066	中国长城	2015-12-31	标准无保留意见	1
000066	中国长城	2016-12-31	标准无保留意见	1
000066	中国长城	2017-12-31	标准无保留意见	1
000066	中国长城	2018-12-31	标准无保留意见	1
000066	中国长城	2019-12-31	标准无保留意见	1
000066	中国长城	2020-12-31	标准无保留意见	1
000066	中国长城	2021-12-31	标准无保留意见	1
000066	中国长城	2022-12-31	标准无保留意见	1
000066	中国长城	2023-12-31	标准无保留意见	1
000068	华控赛格	1997-12-31	保留意见加说明段	0
000068	华控赛格	1998-12-31	标准无保留意见	1
000068	华控赛格	1999-12-31	标准无保留意见	1
000068	华控赛格	2000-12-31	标准无保留意见	1
000068	华控赛格	2001-12-31	无保留意见加说明段	0
000068	华控赛格	2002-12-31	标准无保留意见	1
000068	华控赛格	2003-12-31	标准无保留意见	1
000068	华控赛格	2004-12-31	标准无保留意见	1
000068	华控赛格	2005-12-31	标准无保留意见	1
000068	华控赛格	2006-12-31	标准无保留意见	1
000068	华控赛格	2007-12-31	标准无保留意见	1
000068	华控赛格	2008-12-31	标准无保留意见	1
000068	华控赛格	2009-06-30	无法表示意见	0
000068	华控赛格	2009-12-31	无法表示意见	0
000068	华控赛格	2010-12-31	带有解释性说明的无保留意见	0
000068	华控赛格	2011-12-31	带有解释性说明的无保留意见	0
000068	华控赛格	2012-12-31	带有解释性说明的无保留意见	0
000068	华控赛格	2013-12-31	标准无保留意见	1
000068	华控赛格	2014-12-31	标准无保留意见	1
000068	华控赛格	2015-12-31	标准无保留意见	1
000068	华控赛格	2016-12-31	标准无保留意见	1
000068	华控赛格	2017-12-31	标准无保留意见	1
000068	华控赛格	2018-12-31	标准无保留意见	1
000068	华控赛格	2019-12-31	标准无保留意见	1
000068	华控赛格	2020-12-31	标准无保留意见	1
000068	华控赛格	2021-12-31	带有解释性说明的无保留意见	0
000068	华控赛格	2022-12-31	带有解释性说明的无保留意见	0
000068	华控赛格	2023-12-31	标准无保留意见	1
000069	华侨城A	1997-12-31	标准无保留意见	1
000069	华侨城A	1998-06-30	标准无保留意见	1
000069	华侨城A	1998-12-31	标准无保留意见	1
000069	华侨城A	1999-06-30	标准无保留意见	1
000069	华侨城A	1999-12-31	标准无保留意见	1
000069	华侨城A	2000-12-31	标准无保留意见	1
000069	华侨城A	2001-12-31	标准无保留意见	1
000069	华侨城A	2002-12-31	标准无保留意见	1
000069	华侨城A	2003-06-30	标准无保留意见	1
000069	华侨城A	2003-12-31	标准无保留意见	1
000069	华侨城A	2004-12-31	标准无保留意见	1
000069	华侨城A	2005-12-31	标准无保留意见	1
000069	华侨城A	2006-12-31	标准无保留意见	1
000069	华侨城A	2007-12-31	标准无保留意见	1
000069	华侨城A	2008-12-31	标准无保留意见	1
000069	华侨城A	2009-12-31	标准无保留意见	1
000069	华侨城A	2010-12-31	标准无保留意见	1
000069	华侨城A	2011-12-31	标准无保留意见	1
000069	华侨城A	2012-12-31	标准无保留意见	1
000069	华侨城A	2013-12-31	标准无保留意见	1
000069	华侨城A	2014-12-31	标准无保留意见	1
000069	华侨城A	2015-12-31	标准无保留意见	1
000069	华侨城A	2016-12-31	标准无保留意见	1
000069	华侨城A	2017-12-31	标准无保留意见	1
000069	华侨城A	2018-12-31	标准无保留意见	1
000069	华侨城A	2019-12-31	标准无保留意见	1
000069	华侨城A	2020-12-31	标准无保留意见	1
000069	华侨城A	2021-12-31	标准无保留意见	1
000069	华侨城A	2022-12-31	标准无保留意见	1
000069	华侨城A	2023-12-31	标准无保留意见	1
000078	海王生物	1998-12-31	保留意见加说明段	0
000078	海王生物	1999-12-31	标准无保留意见	1
000078	海王生物	2000-06-30	标准无保留意见	1
000078	海王生物	2000-12-31	标准无保留意见	1
000078	海王生物	2001-12-31	无保留意见加说明段	0
000078	海王生物	2002-12-31	标准无保留意见	1
000078	海王生物	2003-12-31	标准无保留意见	1
000078	海王生物	2004-12-31	标准无保留意见	1
000078	海王生物	2005-12-31	标准无保留意见	1
000078	海王生物	2006-12-31	标准无保留意见	1
000078	海王生物	2007-12-31	标准无保留意见	1
000078	海王生物	2008-12-31	标准无保留意见	1
000078	海王生物	2009-12-31	带有解释性说明的无保留意见	0
000078	海王生物	2010-12-31	标准无保留意见	1
000078	海王生物	2011-12-31	标准无保留意见	1
000078	海王生物	2012-12-31	标准无保留意见	1
000078	海王生物	2013-12-31	标准无保留意见	1
000078	海王生物	2014-12-31	标准无保留意见	1
000078	海王生物	2015-12-31	标准无保留意见	1
000078	海王生物	2016-12-31	标准无保留意见	1
000078	海王生物	2017-12-31	标准无保留意见	1
000078	海王生物	2018-12-31	标准无保留意见	1
000078	海王生物	2019-12-31	标准无保留意见	1
000078	海王生物	2020-12-31	标准无保留意见	1
000078	海王生物	2021-12-31	标准无保留意见	1
000078	海王生物	2022-12-31	标准无保留意见	1
000078	海王生物	2023-12-31	标准无保留意见	1
000088	盐田港	1997-12-31	标准无保留意见	1
000088	盐田港	1998-12-31	标准无保留意见	1
000088	盐田港	1999-12-31	标准无保留意见	1
000088	盐田港	2000-12-31	标准无保留意见	1
000088	盐田港	2001-06-30	标准无保留意见	1
000088	盐田港	2001-12-31	标准无保留意见	1
000088	盐田港	2002-12-31	标准无保留意见	1
000088	盐田港	2003-12-31	标准无保留意见	1
000088	盐田港	2004-12-31	标准无保留意见	1
000088	盐田港	2005-12-31	标准无保留意见	1
000088	盐田港	2006-12-31	标准无保留意见	1
000088	盐田港	2007-12-31	标准无保留意见	1
000088	盐田港	2008-12-31	标准无保留意见	1
000088	盐田港	2009-12-31	标准无保留意见	1
000088	盐田港	2010-12-31	标准无保留意见	1
000088	盐田港	2011-12-31	标准无保留意见	1
000088	盐田港	2012-12-31	标准无保留意见	1
000088	盐田港	2013-12-31	标准无保留意见	1
000088	盐田港	2014-12-31	标准无保留意见	1
000088	盐田港	2015-12-31	标准无保留意见	1
000088	盐田港	2016-12-31	标准无保留意见	1
000088	盐田港	2017-12-31	标准无保留意见	1
000088	盐田港	2018-12-31	标准无保留意见	1
000088	盐田港	2019-12-31	标准无保留意见	1
000088	盐田港	2020-12-31	标准无保留意见	1
000088	盐田港	2021-12-31	标准无保留意见	1
000088	盐田港	2022-12-31	标准无保留意见	1
000088	盐田港	2023-12-31	标准无保留意见	1
000089	深圳机场	1998-12-31	标准无保留意见	1
000089	深圳机场	1999-06-30	标准无保留意见	1
000089	深圳机场	1999-12-31	标准无保留意见	1
000089	深圳机场	2000-12-31	标准无保留意见	1
000089	深圳机场	2001-12-31	标准无保留意见	1
000089	深圳机场	2002-06-30	保留意见	0
000089	深圳机场	2002-12-31	标准无保留意见	1
000089	深圳机场	2003-12-31	标准无保留意见	1
000089	深圳机场	2004-12-31	带有解释性说明的无保留意见	0
000089	深圳机场	2005-12-31	带有解释性说明的无保留意见	0
000089	深圳机场	2006-12-31	带有解释性说明的无保留意见	0
000089	深圳机场	2007-12-31	带有解释性说明的无保留意见	0
000089	深圳机场	2008-12-31	标准无保留意见	1
000089	深圳机场	2009-12-31	标准无保留意见	1
000089	深圳机场	2010-12-31	标准无保留意见	1
000089	深圳机场	2011-12-31	标准无保留意见	1
000089	深圳机场	2012-12-31	标准无保留意见	1
000089	深圳机场	2013-12-31	标准无保留意见	1
000089	深圳机场	2014-12-31	标准无保留意见	1
000089	深圳机场	2015-12-31	标准无保留意见	1
000089	深圳机场	2016-12-31	标准无保留意见	1
000089	深圳机场	2017-12-31	标准无保留意见	1
000089	深圳机场	2018-12-31	标准无保留意见	1
000089	深圳机场	2019-12-31	标准无保留意见	1
000089	深圳机场	2020-12-31	标准无保留意见	1
000089	深圳机场	2021-12-31	标准无保留意见	1
000089	深圳机场	2022-12-31	标准无保留意见	1
000089	深圳机场	2023-12-31	标准无保留意见	1
000090	天健集团	1999-12-31	标准无保留意见	1
000090	天健集团	2000-12-31	标准无保留意见	1
000090	天健集团	2001-12-31	无保留意见加说明段	0
000090	天健集团	2002-12-31	无保留意见加说明段	0
000090	天健集团	2003-06-30	带有解释性说明的无保留意见	0
000090	天健集团	2003-12-31	标准无保留意见	1
000090	天健集团	2004-12-31	标准无保留意见	1
000090	天健集团	2005-12-31	标准无保留意见	1
000090	天健集团	2006-12-31	标准无保留意见	1
000090	天健集团	2007-12-31	标准无保留意见	1
000090	天健集团	2008-12-31	标准无保留意见	1
000090	天健集团	2009-12-31	标准无保留意见	1
000090	天健集团	2010-12-31	标准无保留意见	1
000090	天健集团	2011-12-31	标准无保留意见	1
000090	天健集团	2012-12-31	标准无保留意见	1
000090	天健集团	2013-12-31	标准无保留意见	1
000090	天健集团	2014-12-31	标准无保留意见	1
000090	天健集团	2015-12-31	标准无保留意见	1
000090	天健集团	2016-12-31	标准无保留意见	1
000090	天健集团	2017-12-31	标准无保留意见	1
000090	天健集团	2018-12-31	标准无保留意见	1
000090	天健集团	2019-12-31	标准无保留意见	1
000090	天健集团	2020-12-31	标准无保留意见	1
000090	天健集团	2021-12-31	标准无保留意见	1
000090	天健集团	2022-12-31	标准无保留意见	1
000090	天健集团	2023-12-31	标准无保留意见	1
000096	广聚能源	2000-12-31	标准无保留意见	1
000096	广聚能源	2001-12-31	无保留意见加说明段	0
000096	广聚能源	2002-12-31	标准无保留意见	1
000096	广聚能源	2003-06-30	标准无保留意见	1
000096	广聚能源	2003-12-31	标准无保留意见	1
000096	广聚能源	2004-12-31	标准无保留意见	1
000096	广聚能源	2005-12-31	标准无保留意见	1
000096	广聚能源	2006-12-31	标准无保留意见	1
000096	广聚能源	2007-12-31	标准无保留意见	1
000096	广聚能源	2008-12-31	标准无保留意见	1
000096	广聚能源	2009-12-31	标准无保留意见	1
000096	广聚能源	2010-12-31	标准无保留意见	1
000096	广聚能源	2011-12-31	标准无保留意见	1
000096	广聚能源	2012-12-31	标准无保留意见	1
000096	广聚能源	2013-12-31	标准无保留意见	1
000096	广聚能源	2014-12-31	标准无保留意见	1
000096	广聚能源	2015-12-31	标准无保留意见	1
000096	广聚能源	2016-12-31	标准无保留意见	1
000096	广聚能源	2017-12-31	标准无保留意见	1
000096	广聚能源	2018-12-31	标准无保留意见	1
000096	广聚能源	2019-12-31	标准无保留意见	1
000096	广聚能源	2020-12-31	标准无保留意见	1
000096	广聚能源	2021-12-31	标准无保留意见	1
000096	广聚能源	2022-12-31	标准无保留意见	1
000096	广聚能源	2023-12-31	标准无保留意见	1
000099	中信海直	2000-06-30	标准无保留意见	1
000099	中信海直	2000-12-31	标准无保留意见	1
000099	中信海直	2001-06-30	标准无保留意见	1
000099	中信海直	2001-12-31	标准无保留意见	1
000099	中信海直	2002-06-30	标准无保留意见	1
000099	中信海直	2002-12-31	标准无保留意见	1
000099	中信海直	2003-06-30	标准无保留意见	1
000099	中信海直	2003-12-31	标准无保留意见	1
000099	中信海直	2004-12-31	标准无保留意见	1
000099	中信海直	2005-06-30	标准无保留意见	1
000099	中信海直	2005-12-31	标准无保留意见	1
000099	中信海直	2006-06-30	标准无保留意见	1
000099	中信海直	2006-12-31	标准无保留意见	1
000099	中信海直	2007-12-31	标准无保留意见	1
000099	中信海直	2008-12-31	标准无保留意见	1
000099	中信海直	2009-12-31	标准无保留意见	1
000099	中信海直	2010-12-31	标准无保留意见	1
000099	中信海直	2011-12-31	标准无保留意见	1
000099	中信海直	2012-12-31	标准无保留意见	1
000099	中信海直	2013-12-31	标准无保留意见	1
000099	中信海直	2014-12-31	标准无保留意见	1
000099	中信海直	2015-12-31	标准无保留意见	1
000099	中信海直	2016-12-31	标准无保留意见	1
000099	中信海直	2017-12-31	标准无保留意见	1
000099	中信海直	2018-12-31	标准无保留意见	1
000099	中信海直	2019-12-31	标准无保留意见	1
000099	中信海直	2020-12-31	标准无保留意见	1
000099	中信海直	2021-12-31	标准无保留意见	1
000099	中信海直	2022-12-31	标准无保留意见	1
000099	中信海直	2023-12-31	标准无保留意见	1
000100	TCL科技	2003-12-31	标准无保留意见	1
000100	TCL科技	2004-12-31	标准无保留意见	1
000100	TCL科技	2005-12-31	标准无保留意见	1
000100	TCL科技	2006-12-31	无法表示意见	0
000100	TCL科技	2007-12-31	标准无保留意见	1
000100	TCL科技	2008-12-31	标准无保留意见	1
000100	TCL科技	2009-12-31	标准无保留意见	1
000100	TCL科技	2010-12-31	标准无保留意见	1
000100	TCL科技	2011-12-31	标准无保留意见	1
000100	TCL科技	2012-12-31	标准无保留意见	1
000100	TCL科技	2013-12-31	标准无保留意见	1
000100	TCL科技	2014-12-31	标准无保留意见	1
000100	TCL科技	2015-12-31	标准无保留意见	1
000100	TCL科技	2016-12-31	标准无保留意见	1
000100	TCL科技	2017-12-31	标准无保留意见	1
000100	TCL科技	2018-12-31	标准无保留意见	1
000100	TCL科技	2019-12-31	标准无保留意见	1
000100	TCL科技	2020-12-31	标准无保留意见	1
000100	TCL科技	2021-12-31	标准无保留意见	1
000100	TCL科技	2022-12-31	标准无保留意见	1
000100	TCL科技	2023-12-31	标准无保留意见	1
000151	中成股份	2000-12-31	标准无保留意见	1
000151	中成股份	2001-06-30	标准无保留意见	1
000151	中成股份	2001-12-31	标准无保留意见	1
000151	中成股份	2002-12-31	标准无保留意见	1
000151	中成股份	2003-12-31	标准无保留意见	1
000151	中成股份	2004-12-31	标准无保留意见	1
000151	中成股份	2005-12-31	标准无保留意见	1
000151	中成股份	2006-12-31	标准无保留意见	1
000151	中成股份	2007-12-31	标准无保留意见	1
000151	中成股份	2008-12-31	标准无保留意见	1
000151	中成股份	2009-12-31	标准无保留意见	1
000151	中成股份	2010-12-31	标准无保留意见	1
000151	中成股份	2011-12-31	标准无保留意见	1
000151	中成股份	2012-12-31	标准无保留意见	1
000151	中成股份	2013-12-31	标准无保留意见	1
000151	中成股份	2014-12-31	标准无保留意见	1
000151	中成股份	2015-12-31	标准无保留意见	1
000151	中成股份	2016-12-31	标准无保留意见	1
000151	中成股份	2017-12-31	标准无保留意见	1
000151	中成股份	2018-12-31	标准无保留意见	1
000151	中成股份	2019-12-31	标准无保留意见	1
000151	中成股份	2020-12-31	标准无保留意见	1
000151	中成股份	2021-12-31	标准无保留意见	1
000151	中成股份	2022-12-31	标准无保留意见	1
000151	中成股份	2023-12-31	标准无保留意见	1
000153	丰原药业	2000-12-31	标准无保留意见	1
000153	丰原药业	2001-06-30	标准无保留意见	1
000153	丰原药业	2001-12-31	标准无保留意见	1
000153	丰原药业	2002-12-31	标准无保留意见	1
000153	丰原药业	2003-06-30	标准无保留意见	1
000153	丰原药业	2003-12-31	标准无保留意见	1
000153	丰原药业	2004-12-31	标准无保留意见	1
000153	丰原药业	2005-12-31	标准无保留意见	1
000153	丰原药业	2006-12-31	标准无保留意见	1
000153	丰原药业	2007-12-31	标准无保留意见	1
000153	丰原药业	2008-12-31	标准无保留意见	1
000153	丰原药业	2009-12-31	标准无保留意见	1
000153	丰原药业	2010-12-31	标准无保留意见	1
000153	丰原药业	2011-12-31	标准无保留意见	1
000153	丰原药业	2012-12-31	标准无保留意见	1
000153	丰原药业	2013-12-31	标准无保留意见	1
000153	丰原药业	2014-12-31	标准无保留意见	1
000153	丰原药业	2015-12-31	标准无保留意见	1
000153	丰原药业	2016-12-31	标准无保留意见	1
000153	丰原药业	2017-12-31	标准无保留意见	1
000153	丰原药业	2018-12-31	标准无保留意见	1
000153	丰原药业	2019-12-31	标准无保留意见	1
000153	丰原药业	2020-12-31	标准无保留意见	1
000153	丰原药业	2021-12-31	标准无保留意见	1
000153	丰原药业	2022-12-31	标准无保留意见	1
000153	丰原药业	2023-12-31	标准无保留意见	1
000155	川能动力	2000-12-31	标准无保留意见	1
000155	川能动力	2001-12-31	标准无保留意见	1
000155	川能动力	2002-12-31	标准无保留意见	1
000155	川能动力	2003-12-31	标准无保留意见	1
000155	川能动力	2004-12-31	标准无保留意见	1
000155	川能动力	2005-12-31	标准无保留意见	1
000155	川能动力	2006-12-31	标准无保留意见	1
000155	川能动力	2007-12-31	标准无保留意见	1
000155	川能动力	2008-12-31	标准无保留意见	1
000155	川能动力	2009-12-31	标准无保留意见	1
000155	川能动力	2010-12-31	标准无保留意见	1
000155	川能动力	2011-12-31	标准无保留意见	1
000155	川能动力	2012-12-31	标准无保留意见	1
000155	川能动力	2013-12-31	标准无保留意见	1
000155	川能动力	2014-12-31	带有解释性说明的无保留意见	0
000155	川能动力	2015-12-31	无法表示意见	0
000155	川能动力	2016-12-31	标准无保留意见	1
000155	川能动力	2017-12-31	标准无保留意见	1
000155	川能动力	2018-12-31	标准无保留意见	1
000155	川能动力	2019-12-31	标准无保留意见	1
000155	川能动力	2020-12-31	标准无保留意见	1
000155	川能动力	2021-12-31	标准无保留意见	1
000155	川能动力	2022-12-31	标准无保留意见	1
000155	川能动力	2023-12-31	标准无保留意见	1
000156	华数传媒	2000-12-31	标准无保留意见	1
000156	华数传媒	2001-12-31	标准无保留意见	1
000156	华数传媒	2002-12-31	标准无保留意见	1
000156	华数传媒	2003-12-31	标准无保留意见	1
000156	华数传媒	2004-12-31	带有解释性说明的无保留意见	0
000156	华数传媒	2005-12-31	保留意见	0
000156	华数传媒	2006-12-31	带有解释性说明的无保留意见	0
000156	华数传媒	2007-12-31	带有解释性说明的无保留意见	0
000156	华数传媒	2008-12-31	带有解释性说明的无保留意见	0
000156	华数传媒	2009-12-31	带有解释性说明的无保留意见	0
000156	华数传媒	2010-12-31	带有解释性说明的无保留意见	0
000156	华数传媒	2011-12-31	带有解释性说明的无保留意见	0
000156	华数传媒	2012-06-30	带有解释性说明的无保留意见	0
000156	华数传媒	2012-12-31	标准无保留意见	1
000156	华数传媒	2013-12-31	标准无保留意见	1
000156	华数传媒	2014-12-31	标准无保留意见	1
000156	华数传媒	2015-12-31	标准无保留意见	1
000156	华数传媒	2016-12-31	标准无保留意见	1
000156	华数传媒	2017-12-31	标准无保留意见	1
000156	华数传媒	2018-12-31	标准无保留意见	1
000156	华数传媒	2019-12-31	标准无保留意见	1
000156	华数传媒	2020-12-31	标准无保留意见	1
000156	华数传媒	2021-12-31	标准无保留意见	1
000156	华数传媒	2022-12-31	标准无保留意见	1
000156	华数传媒	2023-12-31	标准无保留意见	1
000157	中联重科	2000-12-31	标准无保留意见	1
000157	中联重科	2001-06-30	标准无保留意见	1
000157	中联重科	2001-12-31	标准无保留意见	1
000157	中联重科	2002-06-30	标准无保留意见	1
000157	中联重科	2002-12-31	标准无保留意见	1
000157	中联重科	2003-12-31	标准无保留意见	1
000157	中联重科	2004-12-31	标准无保留意见	1
000157	中联重科	2005-12-31	标准无保留意见	1
000157	中联重科	2006-12-31	标准无保留意见	1
000157	中联重科	2007-12-31	标准无保留意见	1
000157	中联重科	2008-12-31	标准无保留意见	1
000157	中联重科	2009-12-31	标准无保留意见	1
000157	中联重科	2010-06-30	标准无保留意见	1
000157	中联重科	2010-12-31	标准无保留意见	1
000157	中联重科	2011-12-31	标准无保留意见	1
000157	中联重科	2012-12-31	标准无保留意见	1
000157	中联重科	2013-12-31	标准无保留意见	1
000157	中联重科	2014-12-31	标准无保留意见	1
000157	中联重科	2015-12-31	标准无保留意见	1
000157	中联重科	2016-12-31	标准无保留意见	1
000157	中联重科	2017-12-31	标准无保留意见	1
000157	中联重科	2018-12-31	标准无保留意见	1
000157	中联重科	2019-12-31	标准无保留意见	1
000157	中联重科	2020-12-31	标准无保留意见	1
000157	中联重科	2021-12-31	标准无保留意见	1
000157	中联重科	2022-12-31	标准无保留意见	1
000157	中联重科	2023-12-31	标准无保留意见	1
000158	常山北明	2000-12-31	标准无保留意见	1
000158	常山北明	2001-12-31	标准无保留意见	1
000158	常山北明	2002-06-30	标准无保留意见	1
000158	常山北明	2002-12-31	标准无保留意见	1
000158	常山北明	2003-12-31	标准无保留意见	1
000158	常山北明	2004-12-31	标准无保留意见	1
000158	常山北明	2005-12-31	标准无保留意见	1
000158	常山北明	2006-12-31	标准无保留意见	1
000158	常山北明	2007-12-31	标准无保留意见	1
000158	常山北明	2008-12-31	标准无保留意见	1
000158	常山北明	2009-12-31	标准无保留意见	1
000158	常山北明	2010-12-31	标准无保留意见	1
000158	常山北明	2011-12-31	标准无保留意见	1
000158	常山北明	2012-12-31	标准无保留意见	1
000158	常山北明	2013-12-31	标准无保留意见	1
000158	常山北明	2014-12-31	标准无保留意见	1
000158	常山北明	2015-12-31	标准无保留意见	1
000158	常山北明	2016-12-31	标准无保留意见	1
000158	常山北明	2017-12-31	标准无保留意见	1
000158	常山北明	2018-12-31	标准无保留意见	1
000158	常山北明	2019-12-31	标准无保留意见	1
000158	常山北明	2020-12-31	标准无保留意见	1
000158	常山北明	2021-12-31	标准无保留意见	1
000158	常山北明	2022-12-31	标准无保留意见	1
000158	常山北明	2023-12-31	标准无保留意见	1
000159	国际实业	2000-12-31	标准无保留意见	1
000159	国际实业	2001-06-30	无保留意见加说明段	0
000159	国际实业	2001-12-31	无保留意见加说明段	0
000159	国际实业	2002-12-31	无保留意见加说明段	0
000159	国际实业	2003-12-31	标准无保留意见	1
000159	国际实业	2004-12-31	标准无保留意见	1
000159	国际实业	2005-12-31	标准无保留意见	1
000159	国际实业	2006-12-31	标准无保留意见	1
000159	国际实业	2007-12-31	标准无保留意见	1
000159	国际实业	2008-12-31	标准无保留意见	1
000159	国际实业	2009-12-31	标准无保留意见	1
000159	国际实业	2010-12-31	标准无保留意见	1
000159	国际实业	2011-12-31	标准无保留意见	1
000159	国际实业	2012-12-31	标准无保留意见	1
000159	国际实业	2013-12-31	标准无保留意见	1
000159	国际实业	2014-12-31	标准无保留意见	1
000159	国际实业	2015-12-31	标准无保留意见	1
000159	国际实业	2016-12-31	标准无保留意见	1
000159	国际实业	2017-12-31	标准无保留意见	1
000159	国际实业	2018-12-31	标准无保留意见	1
000159	国际实业	2019-12-31	标准无保留意见	1
000159	国际实业	2020-12-31	标准无保留意见	1
000159	国际实业	2021-12-31	标准无保留意见	1
000159	国际实业	2022-12-31	标准无保留意见	1
000159	国际实业	2023-12-31	标准无保留意见	1
000301	东方盛虹	1999-06-30	标准无保留意见	1
000301	东方盛虹	2000-12-31	标准无保留意见	1
000301	东方盛虹	2001-06-30	标准无保留意见	1
000301	东方盛虹	2001-12-31	标准无保留意见	1
000301	东方盛虹	2002-06-30	标准无保留意见	1
000301	东方盛虹	2002-12-31	标准无保留意见	1
000301	东方盛虹	2003-12-31	标准无保留意见	1
000301	东方盛虹	2004-12-31	保留意见加事项段	0
000301	东方盛虹	2005-12-31	标准无保留意见	1
000301	东方盛虹	2006-06-30	标准无保留意见	1
000301	东方盛虹	2006-12-31	标准无保留意见	1
000301	东方盛虹	2007-12-31	标准无保留意见	1
000301	东方盛虹	2008-12-31	标准无保留意见	1
000301	东方盛虹	2009-12-31	标准无保留意见	1
000301	东方盛虹	2010-12-31	标准无保留意见	1
000301	东方盛虹	2011-12-31	标准无保留意见	1
000301	东方盛虹	2012-12-31	标准无保留意见	1
000301	东方盛虹	2013-12-31	标准无保留意见	1
000301	东方盛虹	2014-12-31	标准无保留意见	1
000301	东方盛虹	2015-12-31	标准无保留意见	1
000301	东方盛虹	2016-12-31	标准无保留意见	1
000301	东方盛虹	2017-12-31	标准无保留意见	1
000301	东方盛虹	2018-12-31	标准无保留意见	1
000301	东方盛虹	2019-12-31	标准无保留意见	1
000301	东方盛虹	2020-12-31	标准无保留意见	1
000301	东方盛虹	2021-12-31	标准无保留意见	1
000301	东方盛虹	2022-12-31	标准无保留意见	1
000301	东方盛虹	2023-12-31	标准无保留意见	1
000333	美的集团	2013-12-31	标准无保留意见	1
000333	美的集团	2014-12-31	标准无保留意见	1
000333	美的集团	2015-12-31	标准无保留意见	1
000333	美的集团	2016-12-31	标准无保留意见	1
000333	美的集团	2017-12-31	标准无保留意见	1
000333	美的集团	2018-12-31	标准无保留意见	1
000333	美的集团	2019-12-31	标准无保留意见	1
000333	美的集团	2020-12-31	标准无保留意见	1
000333	美的集团	2021-12-31	标准无保留意见	1
000333	美的集团	2022-12-31	标准无保留意见	1
000333	美的集团	2023-12-31	标准无保留意见	1
000338	潍柴动力	2007-06-30	标准无保留意见	1
000338	潍柴动力	2007-12-31	标准无保留意见	1
000338	潍柴动力	2008-06-30	标准无保留意见	1
000338	潍柴动力	2008-12-31	标准无保留意见	1
000338	潍柴动力	2009-12-31	标准无保留意见	1
000338	潍柴动力	2010-06-30	标准无保留意见	1
000338	潍柴动力	2010-12-31	标准无保留意见	1
000338	潍柴动力	2011-06-30	标准无保留意见	1
000338	潍柴动力	2011-12-31	标准无保留意见	1
000338	潍柴动力	2012-06-30	标准无保留意见	1
000338	潍柴动力	2012-12-31	标准无保留意见	1
000338	潍柴动力	2013-12-31	标准无保留意见	1
000338	潍柴动力	2014-12-31	标准无保留意见	1
000338	潍柴动力	2015-12-31	标准无保留意见	1
000338	潍柴动力	2016-12-31	标准无保留意见	1
000338	潍柴动力	2017-12-31	标准无保留意见	1
000338	潍柴动力	2018-12-31	标准无保留意见	1
000338	潍柴动力	2019-12-31	标准无保留意见	1
[truncated: 60,763 more rows]
