# Supplementary material for: How corporate ESG performance enables New-qualitive Productive forces development based on Listed companies in the manufacturing industry: Evidence from China
Source: Research Square preprint supplement (doi:10.21203/rs.3.rs-6158355/v1), 2025-07-24
Supplement: Supplementary file 6 [file 50b195adeb52da381a5c5b40.xlsx]

## Sheet: Sheet2
证券代码	证券简称	stkcd	year	组织韧性	当年月个股回报收益率标准差	企业3年内累计销售收入增长额（百亿元）	行业代码	行业名称	所属省份	所属城市
000002	深万科A	2	2000	0.649385	0.141946	0.183603	K70	房地产业	广东省	深圳市
000002	深万科A	2	2001	0.512539	0.0618231	0.220895	K70	房地产业	广东省	深圳市
000002	万科A	2	2002	0.431633	0.069503	0.170156	K70	房地产业	广东省	深圳市
000002	万科A	2	2003	0.265758	0.0945047	0.259639	K70	房地产业	广东省	深圳市
000002	万科A	2	2004	0.0647803	0.0901727	0.321216	K70	房地产业	广东省	深圳市
000002	G 万科A	2	2005	0.0234528	0.103456	0.598449	K70	房地产业	广东省	深圳市
000002	万科A	2	2006	0.0433179	0.156275	1.14681	K70	房地产业	广东省	深圳市
000002	万科A	2	2007	0.0647303	0.24532	2.78594	K70	房地产业	广东省	深圳市
000002	万科A	2	2008	0.0998803	0.115912	3.04329	K70	房地产业	广东省	深圳市
000002	万科A	2	2009	0.168442	0.146552	3.10328	K70	房地产业	广东省	深圳市
000002	万科A	2	2010	0.0430411	0.119079	1.51872	K70	房地产业	广东省	深圳市
000002	万科A	2	2011	0.0861024	0.0717535	3.0791	K70	房地产业	广东省	深圳市
000002	万科A	2	2012	0.0574319	0.0715135	5.42352	K70	房地产业	广东省	深圳市
000002	万科A	2	2013	0.125568	0.094331	8.47049	K70	房地产业	广东省	深圳市
000002	万科A	2	2014	0.425804	0.129237	7.46053	K70	房地产业	广东省	深圳市
000002	万科A	2	2015	0.924534	0.184827	9.24329	K70	房地产业	广东省	深圳市
000002	万科A	2	2016	0.645548	0.263479	10.5058	K70	房地产业	广东省	深圳市
000002	万科A	2	2017	0.888296	0.074171	9.65091	K70	房地产业	广东省	深圳市
000002	万科A	2	2018	0.345408	0.0980672	10.213	K70	房地产业	广东省	深圳市
000002	万科A	2	2019	0.276302	0.0799489	12.7417	K70	房地产业	广东省	深圳市
000002	万科A	2	2020	0.865524	0.0699043	17.6215	K70	房地产业	广东省	深圳市
000002	万科A	2	2021	0.620056	0.10017	15.5118	K70	房地产业	广东省	深圳市
000002	万科A	2	2022	0.814782	0.155847	13.5944	K70	房地产业	广东省	深圳市
000002	万科A	2	2023	0.656604	0.0601071	4.66274	K70	房地产业	广东省	深圳市
000004	北大高科	4	2001	0.400689	0.102512	-0.00587468	G54	道路运输业	广东省	深圳市
000004	北大高科	4	2002	0.387377	0.0679851	-0.000442199	G54	道路运输业	广东省	深圳市
000004	北大高科	4	2003	0.212714	0.104828	-0.00114717	G54	道路运输业	广东省	深圳市
000004	北大高科	4	2004	0.0366393	0.17154	0.00447633	G54	道路运输业	广东省	深圳市
000004	国农科技	4	2005	0.0114537	0.112994	-0.00598489	G54	道路运输业	广东省	深圳市
000004	国农科技	4	2011	0.0584669	0.103141	0.00311889	C27	医药制造业	广东省	深圳市
000004	国农科技	4	2012	0.0205795	0.0936433	0.00372827	C27	医药制造业	广东省	深圳市
000004	国农科技	4	2013	0.0415573	0.10458	-0.00585469	C27	医药制造业	广东省	深圳市
000004	国农科技	4	2014	0.258308	0.148608	0.00061051	C27	医药制造业	广东省	深圳市
000004	国农科技	4	2015	0.920068	0.178101	0.00230911	C27	医药制造业	广东省	深圳市
000004	国农科技	4	2016	0.699666	0.219434	0.0214885	C27	医药制造业	广东省	深圳市
000004	国农科技	4	2017	0.832731	0.113484	0.0057997	C27	医药制造业	广东省	深圳市
000004	国农科技	4	2018	0.280207	0.0754033	0.0246414	C27	医药制造业	广东省	深圳市
000004	国农科技	4	2019	0.164013	0.132086	-0.0179423	C27	医药制造业	广东省	深圳市
000004	国华网安	4	2020	0.603918	0.268696	0.0141925	I65	软件和信息技术服务业	广东省	深圳市
000004	国华网安	4	2021	0.515743	0.105388	-0.00779246	I65	软件和信息技术服务业	广东省	深圳市
000004	国华网安	4	2023	0.624529	0.106598	-0.0170482	I65	软件和信息技术服务业	广东省	深圳市
000005	世纪星源	5	2000	0.601085	0.119995	0.0105179	S90	综合	广东省	深圳市
000005	世纪星源	5	2001	0.409368	0.0877239	0.00255569	S90	综合	广东省	深圳市
000005	世纪星源	5	2002	0.301876	0.148156	-0.00806295	S90	综合	广东省	深圳市
000005	世纪星源	5	2008	0.0557426	0.139515	0.00633245	S90	综合	广东省	深圳市
000005	世纪星源	5	2009	0.0717776	0.161814	-0.028487	S90	综合	广东省	深圳市
000005	世纪星源	5	2010	0.0218675	0.112281	-0.0161797	S90	综合	广东省	深圳市
000005	世纪星源	5	2011	0.0582605	0.130526	-0.00451854	S90	综合	广东省	深圳市
000005	世纪星源	5	2012	0.0205841	0.105292	0.00562288	K70	房地产业	广东省	深圳市
000005	世纪星源	5	2013	0.0415873	0.0896056	-0.00851725	K70	房地产业	广东省	深圳市
000005	世纪星源	5	2014	0.253387	0.160367	-0.00107578	K70	房地产业	广东省	深圳市
000005	世纪星源	5	2015	0.796495	1.06473	-0.00152953	K70	房地产业	广东省	深圳市
000005	世纪星源	5	2016	0.862295	0.105885	0.0429802	N77	生态保护和环境治理业	广东省	深圳市
000005	世纪星源	5	2017	0.862042	0.0449504	0.0478145	N77	生态保护和环境治理业	广东省	深圳市
000005	世纪星源	5	2018	0.285317	0.0677067	0.0402055	N77	生态保护和环境治理业	广东省	深圳市
000005	世纪星源	5	2019	0.174061	0.0907361	0.00707456	N77	生态保护和环境治理业	广东省	深圳市
000005	世纪星源	5	2020	0.841277	0.0554435	-0.0132001	N77	生态保护和环境治理业	广东省	深圳市
000006	深振业A	6	2000	0.640436	0.0860775	0.0579449	K70	房地产业	广东省	深圳市
000006	深振业A	6	2001	0.439323	0.0450383	0.0382341	K70	房地产业	广东省	深圳市
000006	深振业A	6	2002	0.338851	0.118422	0.0143555	K70	房地产业	广东省	深圳市
000006	深振业A	6	2003	0.226611	0.0813154	0.0103371	K70	房地产业	广东省	深圳市
000006	深振业A	6	2004	0.0448777	0.131149	-0.0147213	K70	房地产业	广东省	深圳市
000006	G 深振业	6	2005	0.0114537	0.0658232	-0.0652184	K70	房地产业	广东省	深圳市
000006	深振业A	6	2006	0.0234593	0.177902	-0.0732554	K70	房地产业	广东省	深圳市
000006	深振业A	6	2007	0.0190458	0.198991	-0.0852938	K70	房地产业	广东省	深圳市
000006	深振业A	6	2008	0.0546637	0.177002	-0.041212	K70	房地产业	广东省	深圳市
000006	深振业A	6	2009	0.0744704	0.168843	0.0594697	K70	房地产业	广东省	深圳市
000006	深振业A	6	2010	0.0236406	0.243476	0.13147	K70	房地产业	广东省	深圳市
000006	深振业A	6	2011	0.059988	0.0736841	0.156753	K70	房地产业	广东省	深圳市
000006	深振业A	6	2012	0.0213738	0.113911	0.122701	K70	房地产业	广东省	深圳市
000006	深振业A	6	2013	0.0437983	0.122598	0.227212	K70	房地产业	广东省	深圳市
000006	深振业A	6	2014	0.277938	0.0999876	-0.0260546	K70	房地产业	广东省	深圳市
000006	深振业A	6	2015	0.917643	0.196303	0.0578064	K70	房地产业	广东省	深圳市
000006	深圳业A	6	2016	0.826287	0.130929	-0.125203	K70	房地产业	广东省	深圳市
000006	深振业A	6	2017	0.849916	0.0736112	0.0630721	K70	房地产业	广东省	深圳市
000006	深振业A	6	2018	0.267294	0.093647	-0.114247	K70	房地产业	广东省	深圳市
000006	深振业A	6	2019	0.176489	0.0815373	0.0372504	K70	房地产业	广东省	深圳市
000006	深振业A	6	2020	0.706603	0.17643	-0.00247169	K70	房地产业	广东省	深圳市
000006	深振业A	6	2021	0.526705	0.0671412	0.0576726	K70	房地产业	广东省	深圳市
000006	深振业A	6	2022	0.765736	0.197497	-0.00315166	K70	房地产业	广东省	深圳市
000006	深振业A	6	2023	0.632967	0.0844217	-0.012413	K70	房地产业	广东省	深圳市
000007	深达声A	7	2000	0.591547	0.122026	-0.0121609	K70	房地产业	广东省	深圳市
000007	深达声A	7	2002	0.347831	0.107922	0.00709627	K70	房地产业	广东省	深圳市
000007	深达声A	7	2003	0.226182	0.0887229	0.0282337	K70	房地产业	广东省	深圳市
000007	深达声A	7	2004	0.037512	0.163879	-0.0204039	K70	房地产业	广东省	深圳市
000007	深达声A	7	2005	0.0114537	0.189671	0.0123269	K70	房地产业	广东省	深圳市
000007	深达声A	7	2006	0.0265813	0.131314	-0.0140747	K70	房地产业	广东省	深圳市
000007	零七股份	7	2012	0.0206232	0.168289	0.0179354	H61	住宿业	广东省	深圳市
000007	零七股份	7	2013	0.0415907	0.12979	0.00710564	H61	住宿业	广东省	深圳市
000007	零七股份	7	2014	0.251459	0.165231	0.00327583	H61	住宿业	广东省	深圳市
000007	全新好	7	2015	0.910083	0.2494	-0.0213703	H61	住宿业	广东省	深圳市
000007	全新好	7	2016	0.763734	0.174673	-0.0175488	H61	住宿业	广东省	深圳市
000007	全新好	7	2017	0.850183	0.0722363	-0.0158454	K70	房地产业	广东省	深圳市
000007	全新好	7	2018	0.24689	0.126444	-0.00565176	K70	房地产业	广东省	深圳市
000007	全新好	7	2019	0.147762	0.200889	0.000316044	K70	房地产业	广东省	深圳市
000007	全新好	7	2020	0.801262	0.091413	0.000550239	K70	房地产业	广东省	深圳市
000007	全新好	7	2022	0.850232	0.0451457	0.0178817	K70	房地产业	广东省	深圳市
000008	亿安科技	8	2000	0.451475	0.344383	0.00263271	I64	互联网和相关服务	广东省	深圳市
000008	亿安科技	8	2001	0.37912	0.16381	-0.00747886	I64	互联网和相关服务	广东省	深圳市
000008	G 宝利来	8	2005	0.0114537	0.179623	0.00333752	I64	互联网和相关服务	广东省	深圳市
000008	宝利来	8	2006	0.0274368	0.117549	-0.000926222	I64	互联网和相关服务	广东省	深圳市
000008	宝利来	8	2013	0.0418977	0.10692	0.0294011	H61	住宿业	广东省	深圳市
000008	宝利来	8	2014	0.19397	0.304944	0.02932	H61	住宿业	广东省	深圳市
000008	神州高铁	8	2015	0.910002	0.251691	0.0963595	C37	铁路、船舶、航空航天和其它运输设备制造业	北京市	北京市
000008	神州高铁	8	2016	0.756152	0.180071	0.157156	C37	铁路、船舶、航空航天和其它运输设备制造业	北京市	北京市
000008	神州高铁	8	2017	0.852164	0.0696448	0.202375	C37	铁路、船舶、航空航天和其它运输设备制造业	北京市	北京市
000008	神州高铁	8	2018	0.269594	0.0930169	0.126983	C37	铁路、船舶、航空航天和其它运输设备制造业	北京市	北京市
000008	神州高铁	8	2019	0.173146	0.0987586	0.134414	C37	铁路、船舶、航空航天和其它运输设备制造业	北京市	北京市
000008	神州高铁	8	2020	0.857564	0.0407565	-0.0413413	C37	铁路、船舶、航空航天和其它运输设备制造业	北京市	北京市
000008	神州高铁	8	2021	0.513138	0.114197	-0.0350097	C37	铁路、船舶、航空航天和其它运输设备制造业	北京市	北京市
000008	神州高铁	8	2022	0.812201	0.11319	-0.144719	C37	铁路、船舶、航空航天和其它运输设备制造业	北京市	北京市
000008	神州高铁	8	2023	0.649091	0.0425581	0.0594129	C37	铁路、船舶、航空航天和其它运输设备制造业	北京市	北京市
000009	深宝安A	9	2000	0.590766	0.125734	-0.00761732	S90	综合	广东省	深圳市
000009	深宝安A	9	2001	0.421092	0.0859247	0.0282677	S90	综合	广东省	深圳市
000009	深宝安A	9	2002	0.26318	0.191541	0.0159992	S90	综合	广东省	深圳市
000009	深宝安A	9	2003	0.242044	0.0704012	0.0646024	S90	综合	广东省	深圳市
000009	深宝安A	9	2004	0.0558143	0.0937639	0.0694502	S90	综合	广东省	深圳市
000009	深宝安A	9	2005	0.0130744	0.115173	0.103632	S90	综合	广东省	深圳市
000009	S 深宝安A	9	2006	0.0309681	0.0826867	0.120785	S90	综合	广东省	深圳市
000009	S 深宝安A	9	2007	0.021052	0.198322	0.0404575	S90	综合	广东省	深圳市
000009	中国宝安	9	2008	0.0564945	0.174612	0.0837369	S90	综合	广东省	深圳市
000009	中国宝安	9	2009	0.0749651	0.192793	0.0778006	S90	综合	广东省	深圳市
000009	中国宝安	9	2010	0.0238184	0.123711	0.126828	S90	综合	广东省	深圳市
000009	中国宝安	9	2011	0.0592309	0.153862	0.117302	S90	综合	广东省	深圳市
000009	中国宝安	9	2012	0.0210471	0.12237	0.0755201	S90	综合	广东省	深圳市
000009	中国宝安	9	2013	0.0424992	0.116665	0.0938247	S90	综合	广东省	深圳市
000009	中国宝安	9	2014	0.24501	0.181852	0.0246221	S90	综合	广东省	深圳市
000009	中国宝安	9	2015	0.911953	0.237513	0.0840761	S90	综合	广东省	深圳市
000009	中国宝安	9	2016	0.81528	0.138825	0.225673	S90	综合	广东省	深圳市
000009	中国宝安	9	2017	0.84224	0.0936346	0.271203	S90	综合	广东省	深圳市
000009	中国宝安	9	2018	0.274966	0.0914801	0.68502	S90	综合	广东省	深圳市
000009	中国宝安	9	2019	0.161391	0.161864	0.553698	S90	综合	广东省	深圳市
000009	中国宝安	9	2020	0.773455	0.117122	0.357034	S90	综合	广东省	深圳市
000009	中国宝安	9	2021	0.464052	0.307428	0.583787	S90	综合	广东省	深圳市
000009	中国宝安	9	2022	0.788601	0.163167	2.005	S90	综合	广东省	深圳市
000009	中国宝安	9	2023	0.642998	0.0744162	2.01033	S90	综合	广东省	深圳市
000010	深华新	10	2001	0.393231	0.0991793	-0.025761	F52	零售业	广东省	深圳市
000010	深华新	10	2002	0.317652	0.129647	-0.0210563	F52	零售业	广东省	深圳市
000010	深华新	10	2003	0.219843	0.0799952	-0.0301431	F52	零售业	广东省	深圳市
000010	深华新	10	2004	0.0423205	0.14617	0.00801526	F52	零售业	广东省	深圳市
000010	深华新	10	2005	0.0114537	0.135193	-0.00229489	F52	零售业	广东省	深圳市
000010	深华新	10	2013	0.0417098	0.13484	0.0210517	C35	专用设备制造业	北京市	北京市
000010	深华新	10	2014	0.274411	0.110056	0.00462412	C35	专用设备制造业	北京市	北京市
000010	深华新	10	2015	0.868163	0.551616	0.0769211	E48	土木工程建筑业	北京市	北京市
000010	美丽生态	10	2016	0.90521	0.0759343	0.0691145	E48	土木工程建筑业	广东省	深圳市
000010	美丽生态	10	2017	0.841868	0.0924409	0.0527586	E48	土木工程建筑业	广东省	深圳市
000010	美丽生态	10	2018	0.240534	0.135578	-0.0611969	E48	土木工程建筑业	广东省	深圳市
000010	美丽生态	10	2020	0.795546	0.09668	0.0650657	E48	土木工程建筑业	广东省	深圳市
000010	美丽生态	10	2021	0.530426	0.0556339	0.14115	E48	土木工程建筑业	广东省	深圳市
000010	美丽生态	10	2022	0.804872	0.126469	-0.128002	E48	土木工程建筑业	广东省	深圳市
000010	美丽生态	10	2023	0.604739	0.157935	-0.110563	E48	土木工程建筑业	广东省	深圳市
000011	深物业A	11	2000	0.611235	0.0960078	-0.00478011	S90	综合	广东省	深圳市
000011	深物业A	11	2005	0.0114537	0.0940907	0.0182196	S90	综合	广东省	深圳市
000011	S 深物业A	11	2006	0.0285763	0.068817	-0.0767526	S90	综合	广东省	深圳市
000011	S 深物业A	11	2007	0.0189273	0.145761	-0.0993305	S90	综合	广东省	深圳市
000011	深物业A	11	2009	0.0742501	0.179407	0.0533418	S90	综合	广东省	深圳市
000011	深物业A	11	2010	0.0229329	0.146565	0.066019	K70	房地产业	广东省	深圳市
000011	深物业A	11	2011	0.0590274	0.125527	0.07851	K70	房地产业	广东省	深圳市
000011	深物业A	11	2012	0.0211937	0.165536	0.101593	K70	房地产业	广东省	深圳市
000011	深物业A	11	2013	0.0422245	0.107487	0.0626052	K70	房地产业	广东省	深圳市
000011	深物业A	11	2014	0.284912	0.0838211	-0.0140114	K70	房地产业	广东省	深圳市
000011	深物业A	11	2015	0.913762	0.22218	-0.078388	K70	房地产业	广东省	深圳市
000011	深物业A	11	2016	0.791654	0.155214	0.0439977	K70	房地产业	广东省	深圳市
000011	深物业A	11	2017	0.851751	0.0702484	0.163624	K70	房地产业	广东省	深圳市
000011	深物业A	11	2018	0.269694	0.0933946	0.170982	K70	房地产业	广东省	深圳市
000011	深物业A	11	2019	0.17854	0.0779519	0.190247	K70	房地产业	广东省	深圳市
000011	深物业A	11	2020	0.568239	0.300961	0.119968	K70	房地产业	广东省	深圳市
000011	深物业A	11	2021	0.516367	0.107415	0.170473	K70	房地产业	广东省	深圳市
000011	深物业A	11	2022	0.811454	0.114949	-0.0253001	K70	房地产业	广东省	深圳市
000011	深物业A	11	2023	0.635328	0.0773839	-0.113926	K70	房地产业	广东省	深圳市
000012	深南玻A	12	2000	0.365911	0.495162	0.0386806	C30	非金属矿物制品业	广东省	深圳市
000012	南玻科控	12	2001	0.421874	0.0841638	0.0286891	C30	非金属矿物制品业	广东省	深圳市
000012	南玻科控	12	2002	0.30409	0.150117	0.0077746	C30	非金属矿物制品业	广东省	深圳市
000012	南玻A	12	2003	0.210603	0.117271	0.0213384	C30	非金属矿物制品业	广东省	深圳市
000012	南玻A	12	2004	0.0546664	0.101164	0.084096	C30	非金属矿物制品业	广东省	深圳市
000012	南玻A	12	2005	0.0133912	0.132677	0.124662	C30	非金属矿物制品业	广东省	深圳市
000012	南玻A	12	2006	0.0226824	0.270958	0.162178	C30	非金属矿物制品业	广东省	深圳市
000012	南玻A	12	2007	0.0241863	0.146318	0.2306	C30	非金属矿物制品业	广东省	深圳市
000012	南玻A	12	2008	0.0578528	0.20146	0.197136	C30	非金属矿物制品业	广东省	深圳市
000012	南玻A	12	2009	0.0796406	0.228276	0.23275	C30	非金属矿物制品业	广东省	深圳市
000012	南玻A	12	2010	0.0268947	0.164125	0.355598	C30	非金属矿物制品业	广东省	深圳市
000012	南玻A	12	2011	0.0620445	0.0962676	0.399736	C30	非金属矿物制品业	广东省	深圳市
000012	南玻A	12	2012	0.0217085	0.109764	0.171526	C30	非金属矿物制品业	广东省	深圳市
000012	南玻A	12	2013	0.0413719	0.166528	-0.00101456	C30	非金属矿物制品业	广东省	深圳市
000012	南玻A	12	2014	0.297464	0.0480223	-0.122623	C30	非金属矿物制品业	广东省	深圳市
000012	南玻A	12	2015	0.918983	0.186481	0.0436531	C30	非金属矿物制品业	广东省	深圳市
000012	南玻A	12	2016	0.838306	0.122685	0.124029	C30	非金属矿物制品业	广东省	深圳市
000012	南玻A	12	2017	0.853762	0.0676011	0.38349	C30	非金属矿物制品业	广东省	深圳市
000012	南玻A	12	2018	0.291606	0.061363	0.317907	C30	非金属矿物制品业	广东省	深圳市
000012	南玻A	12	2019	0.175771	0.0882461	0.149794	C30	非金属矿物制品业	广东省	深圳市
000012	南玻A	12	2020	0.791048	0.100544	-0.0208147	C30	非金属矿物制品业	广东省	深圳市
000012	南玻A	12	2021	0.502562	0.160733	0.301907	C30	非金属矿物制品业	广东省	深圳市
000012	南玻A	12	2022	0.808327	0.122305	0.472668	C30	非金属矿物制品业	广东省	深圳市
000012	南玻A	12	2023	0.650317	0.044949	0.752361	C30	非金属矿物制品业	广东省	深圳市
000013	深石化A	13	2000	0.536598	0.122041	-0.163927	F51	批发业	广东省	深圳市
000013	深石化A	13	2001	0.289762	0.0973703	-0.266627	F51	批发业	广东省	深圳市
000014	沙河股份	14	2002	0.353567	0.108531	0.0308027	K70	房地产业	广东省	深圳市
000014	沙河股份	14	2003	0.230771	0.0771951	0.0217458	K70	房地产业	广东省	深圳市
000014	沙河股份	14	2004	0.0477262	0.120785	0.00296742	K70	房地产业	广东省	深圳市
000014	沙河股份	14	2005	0.0114537	0.0745608	-0.00369429	K70	房地产业	广东省	深圳市
000014	沙河股份	14	2006	0.0289511	0.0871812	0.00391861	K70	房地产业	广东省	深圳市
000014	沙河股份	14	2007	0.0199243	0.192937	-0.0309395	K70	房地产业	广东省	深圳市
000014	沙河股份	14	2008	0.0543391	0.247535	-0.0126718	K70	房地产业	广东省	深圳市
000014	沙河股份	14	2009	0.0737035	0.182352	0.035907	K70	房地产业	广东省	深圳市
000014	沙河股份	14	2010	0.0227805	0.146189	0.054928	K70	房地产业	广东省	深圳市
000014	沙河股份	14	2011	0.058633	0.0802463	0.00877056	K70	房地产业	广东省	深圳市
000014	沙河股份	14	2012	0.0202641	0.241635	-0.0272588	K70	房地产业	广东省	深圳市
000014	沙河股份	14	2013	0.0413957	0.117836	-0.0171245	K70	房地产业	广东省	深圳市
000014	沙河股份	14	2014	0.27514	0.108638	0.0111978	K70	房地产业	广东省	深圳市
000014	沙河股份	14	2015	0.916522	0.203499	-0.000809581	K70	房地产业	广东省	深圳市
000014	沙河股份	14	2016	0.864297	0.104465	0.00568069	K70	房地产业	广东省	深圳市
000014	沙河股份	14	2017	0.845667	0.083009	0.00013257	K70	房地产业	广东省	深圳市
000014	沙河股份	14	2018	0.227802	0.155897	-0.00552844	K70	房地产业	广东省	深圳市
000014	沙河股份	14	2019	0.174045	0.0899713	-0.0182618	K70	房地产业	广东省	深圳市
000014	沙河股份	14	2020	0.75425	0.133604	-0.0166468	K70	房地产业	广东省	深圳市
000014	沙河股份	14	2021	0.52668	0.066528	0.0283807	K70	房地产业	广东省	深圳市
000014	沙河股份	14	2022	0.776971	0.177353	0.0325462	K70	房地产业	广东省	深圳市
000014	沙河股份	14	2023	0.621527	0.115484	0.104254	K70	房地产业	广东省	深圳市
000016	深康佳A	16	2000	0.704428	0.103909	0.266936	C39	计算机、通信和其他电子设备制造业	广东省	深圳市
000016	深康佳A	16	2001	0.328508	0.0902509	-0.182576	C39	计算机、通信和其他电子设备制造业	广东省	深圳市
000016	深康佳A	16	2002	0.259692	0.136934	-0.208545	C39	计算机、通信和其他电子设备制造业	广东省	深圳市
000016	深康佳A	16	2003	0.290289	0.0894117	0.379373	C39	计算机、通信和其他电子设备制造业	广东省	深圳市
000016	深康佳A	16	2004	0.079147	0.0750627	0.66144	C39	计算机、通信和其他电子设备制造业	广东省	深圳市
000016	G 康佳A	16	2005	0.018256	0.0814416	0.341424	C39	计算机、通信和其他电子设备制造业	广东省	深圳市
000016	深康佳A	16	2006	0.0288863	0.0823757	-0.0150315	C39	计算机、通信和其他电子设备制造业	广东省	深圳市
000016	深康佳A	16	2007	0.0186008	0.149508	-0.119344	C39	计算机、通信和其他电子设备制造业	广东省	深圳市
000016	深康佳A	16	2008	0.0563552	0.175771	0.0749401	C39	计算机、通信和其他电子设备制造业	广东省	深圳市
000016	深康佳A	16	2009	0.0745488	0.150849	0.0602883	C39	计算机、通信和其他电子设备制造业	广东省	深圳市
000016	深康佳A	16	2010	0.0289189	0.109432	0.494238	C39	计算机、通信和其他电子设备制造业	广东省	深圳市
000016	深康佳A	16	2011	0.0621752	0.0730283	0.401233	C39	计算机、通信和其他电子设备制造业	广东省	深圳市
000016	深康佳A	16	2012	0.0239963	0.107461	0.507883	C39	计算机、通信和其他电子设备制造业	广东省	深圳市
000016	深康佳A	16	2013	0.0445468	0.0877631	0.289528	C39	计算机、通信和其他电子设备制造业	广东省	深圳市
000016	深康佳A	16	2014	0.290602	0.0873388	0.320587	C39	计算机、通信和其他电子设备制造业	广东省	深圳市
000016	深康佳A	16	2015	0.896204	0.349381	0.00573154	C39	计算机、通信和其他电子设备制造业	广东省	深圳市
000016	深康佳A	16	2016	0.817346	0.137264	0.0292611	C39	计算机、通信和其他电子设备制造业	广东省	深圳市
000016	深康佳A	16	2017	0.86293	0.053591	1.18043	C39	计算机、通信和其他电子设备制造业	广东省	深圳市
000016	深康佳A	16	2018	0.277757	0.112437	2.77316	C39	计算机、通信和其他电子设备制造业	广东省	深圳市
000016	深康佳A	16	2019	0.189381	0.140585	3.48198	C39	计算机、通信和其他电子设备制造业	广东省	深圳市
000016	深康佳A	16	2020	0.602742	0.273653	1.91241	C39	计算机、通信和其他电子设备制造业	广东省	深圳市
000016	深康佳A	16	2021	0.513375	0.121357	0.297972	C39	计算机、通信和其他电子设备制造业	广东省	深圳市
000016	深康佳A	16	2022	0.804632	0.118559	-2.55113	C39	计算机、通信和其他电子设备制造业	广东省	深圳市
000016	深康佳A	16	2023	0.638113	0.0446214	-3.25025	C39	计算机、通信和其他电子设备制造业	广东省	深圳市
000017	深中华A	17	2014	0.237733	0.197539	-0.0108973	C37	铁路、船舶、航空航天和其它运输设备制造业	广东省	深圳市
000017	深中华A	17	2015	0.900595	0.317613	-0.0121837	C37	铁路、船舶、航空航天和其它运输设备制造业	广东省	深圳市
000017	深中华A	17	2016	0.862434	0.105755	-0.0129141	C37	铁路、船舶、航空航天和其它运输设备制造业	广东省	深圳市
000017	深中华A	17	2017	0.844042	0.0867587	-0.007458	C37	铁路、船舶、航空航天和其它运输设备制造业	广东省	深圳市
000017	深中华A	17	2018	0.253597	0.116102	-0.00510831	C37	铁路、船舶、航空航天和其它运输设备制造业	广东省	深圳市
000017	深中华A	17	2019	0.161516	0.142936	-0.00659478	C37	铁路、船舶、航空航天和其它运输设备制造业	广东省	深圳市
000017	深中华A	17	2021	0.516338	0.103526	0.00453396	C37	铁路、船舶、航空航天和其它运输设备制造业	广东省	深圳市
000017	深中华A	17	2022	0.797916	0.139585	0.036874	C37	铁路、船舶、航空航天和其它运输设备制造业	广东省	深圳市
000017	深中华A	17	2023	0.64709	0.0477094	0.0450624	C37	铁路、船舶、航空航天和其它运输设备制造业	广东省	深圳市
000018	深中冠A股	18	2000	0.598491	0.106651	-0.0207539	C17	纺织业	广东省	深圳市
000018	深中冠A股	18	2001	0.410077	0.0656753	-0.0131815	C17	纺织业	广东省	深圳市
000018	深中冠A股	18	2002	0.344344	0.10649	-0.0114282	C17	纺织业	广东省	深圳市
000018	深中冠	18	2003	0.235973	0.0604888	0.00444972	C17	纺织业	广东省	深圳市
000018	深中冠A	18	2004	0.0476897	0.122327	0.0122578	C17	纺织业	广东省	深圳市
000018	深中冠A	18	2005	0.0114537	0.158084	0.0110322	C17	纺织业	广东省	深圳市
000018	深中冠A	18	2006	0.0271101	0.125795	0.00323582	C17	纺织业	广东省	深圳市
000018	中冠A	18	2014	0.232027	0.21184	0.000116492	C17	纺织业	广东省	深圳市
000018	神州长城	18	2015	0.906134	0.283837	0.399926	C17	纺织业	广东省	深圳市
000018	神州长城	18	2016	0.812527	0.140889	0.4638	E50	建筑装饰和其他建筑业	广东省	深圳市
000018	神州长城	18	2017	0.850958	0.0767066	0.648611	E50	建筑装饰和其他建筑业	广东省	深圳市
000018	神州长城	18	2018	0.225539	0.157541	-0.158337	E50	建筑装饰和其他建筑业	广东省	深圳市
000019	深深宝	19	2000	0.542053	0.20254	-0.00341781	C15	酒、饮料和精制茶制造业	广东省	深圳市
000019	深深宝A	19	2001	0.407807	0.0853244	-0.00294817	C15	酒、饮料和精制茶制造业	广东省	深圳市
000019	深深宝A	19	2002	0.294268	0.157848	0.00116783	C15	酒、饮料和精制茶制造业	广东省	深圳市
000019	深深宝A	19	2003	0.21962	0.0911762	-0.000817324	C15	酒、饮料和精制茶制造业	广东省	深圳市
000019	深深宝A	19	2004	0.050281	0.108754	0.000356831	C15	酒、饮料和精制茶制造业	广东省	深圳市
000019	深深宝A	19	2005	0.0114537	0.133943	0.000409304	C15	酒、饮料和精制茶制造业	广东省	深圳市
000019	深深宝A	19	2006	0.0287839	0.0907469	0.00404166	C15	酒、饮料和精制茶制造业	广东省	深圳市
000019	深深宝A	19	2007	0.0203328	0.338545	0.0127488	C15	酒、饮料和精制茶制造业	广东省	深圳市
000019	深深宝A	19	2008	0.0549808	0.213283	0.00696557	C15	酒、饮料和精制茶制造业	广东省	深圳市
000019	深深宝A	19	2009	0.0730264	0.121896	0.00816591	C15	酒、饮料和精制茶制造业	广东省	深圳市
000019	深深宝A	19	2010	0.0220923	0.137189	0.00375564	C15	酒、饮料和精制茶制造业	广东省	深圳市
000019	深深宝A	19	2011	0.0585781	0.10517	0.0167112	C15	酒、饮料和精制茶制造业	广东省	深圳市
000019	深深宝A	19	2012	0.0205936	0.159445	0.0126648	C15	酒、饮料和精制茶制造业	广东省	深圳市
000019	深深宝A	19	2013	0.0418439	0.0987272	0.0208521	C15	酒、饮料和精制茶制造业	广东省	深圳市
000019	深深宝A	19	2014	0.27887	0.0993411	0.00498912	C15	酒、饮料和精制茶制造业	广东省	深圳市
000019	深深宝A	19	2015	0.905157	0.285095	0.00274342	C15	酒、饮料和精制茶制造业	广东省	深圳市
000019	深深宝A	19	2016	0.731859	0.196931	-0.0164935	C15	酒、饮料和精制茶制造业	广东省	深圳市
000019	深深宝A	19	2017	0.827854	0.124849	-0.00523587	C15	酒、饮料和精制茶制造业	广东省	深圳市
000019	深粮控股	19	2018	0.281063	0.0863921	1.04206	C15	酒、饮料和精制茶制造业	广东省	深圳市
000019	深粮控股	19	2019	0.187295	0.0703941	1.07866	F51	批发业	广东省	深圳市
000019	深粮控股	19	2020	0.764232	0.12705	1.15688	F51	批发业	广东省	深圳市
000019	深粮控股	19	2021	0.522746	0.0786431	-0.0619219	F51	批发业	广东省	深圳市
000019	深粮控股	19	2022	0.805082	0.125585	-0.274726	F51	批发业	广东省	深圳市
000019	深粮控股	19	2023	0.641912	0.0563589	-0.569452	F51	批发业	广东省	深圳市
000020	深华发A	20	2000	0.547151	0.193564	-0.00555368	C39	计算机、通信和其他电子设备制造业	广东省	深圳市
000020	深华发A	20	2001	0.405988	0.0890381	-0.0042312	C39	计算机、通信和其他电子设备制造业	广东省	深圳市
000020	深华发A	20	2002	0.386224	0.068685	-0.00202193	C39	计算机、通信和其他电子设备制造业	广东省	深圳市
000020	深华发A	20	2003	0.209294	0.112073	1.10761e-05	C39	计算机、通信和其他电子设备制造业	广东省	深圳市
000020	深华发A	20	2009	0.0735219	0.231232	0.0347054	C39	计算机、通信和其他电子设备制造业	广东省	深圳市
000020	深华发A	20	2010	0.0227855	0.145836	0.0552335	C39	计算机、通信和其他电子设备制造业	广东省	深圳市
000020	深华发A	20	2011	0.0591532	0.083132	0.0686377	C39	计算机、通信和其他电子设备制造业	广东省	深圳市
000020	深华发A	20	2012	0.0206831	0.118441	0.0215629	C39	计算机、通信和其他电子设备制造业	广东省	深圳市
000020	深华发	20	2013	0.0415505	0.0905435	-0.0118759	C39	计算机、通信和其他电子设备制造业	广东省	深圳市
000020	深华发A	20	2014	0.283845	0.0861786	-0.0180939	C39	计算机、通信和其他电子设备制造业	广东省	深圳市
000020	深华发A	20	2015	0.872188	0.521297	-0.0224436	C39	计算机、通信和其他电子设备制造业	广东省	深圳市
000020	深华发A	20	2016	0.803755	0.146737	-0.000765327	C39	计算机、通信和其他电子设备制造业	广东省	深圳市
000020	深华发A	20	2017	0.82628	0.128756	0.01632	C39	计算机、通信和其他电子设备制造业	广东省	深圳市
000020	深华发A	20	2018	0.238625	0.139431	0.0137591	C39	计算机、通信和其他电子设备制造业	广东省	深圳市
000020	深华发A	20	2019	0.176848	0.0791429	0.010239	C39	计算机、通信和其他电子设备制造业	广东省	深圳市
000020	深华发A	20	2020	0.794902	0.0970907	-0.0166298	C39	计算机、通信和其他电子设备制造业	广东省	深圳市
000020	深华发A	20	2021	0.526933	0.0652324	0.0128565	C39	计算机、通信和其他电子设备制造业	广东省	深圳市
000020	深华发A	20	2022	0.81343	0.111453	-0.00571223	C39	计算机、通信和其他电子设备制造业	广东省	深圳市
000020	深华发A	20	2023	0.64199	0.0607989	0.00347989	C39	计算机、通信和其他电子设备制造业	广东省	深圳市
000021	深科技A	21	2000	0.704094	0.0725905	0.209429	C39	计算机、通信和其他电子设备制造业	广东省	深圳市
000021	深科技A	21	2001	0.463916	0.0635145	0.109706	C39	计算机、通信和其他电子设备制造业	广东省	深圳市
000021	深科技A	21	2002	0.414561	0.117465	0.292436	C39	计算机、通信和其他电子设备制造业	广东省	深圳市
000021	深科技A	21	2003	0.256013	0.165168	0.399566	C39	计算机、通信和其他电子设备制造业	广东省	深圳市
000021	深科技A	21	2004	0.0643864	0.0888655	0.30026	C39	计算机、通信和其他电子设备制造业	广东省	深圳市
000021	深科技A	21	2005	0.0149819	0.0933046	0.188031	C39	计算机、通信和其他电子设备制造业	广东省	深圳市
000021	长城开发	21	2006	0.0327501	0.0851198	0.243696	C39	计算机、通信和其他电子设备制造业	广东省	深圳市
000021	长城开发	21	2007	0.0303287	0.15698	0.617195	C39	计算机、通信和其他电子设备制造业	广东省	深圳市
000021	长城开发	21	2008	0.0639961	0.155264	0.588806	C39	计算机、通信和其他电子设备制造业	广东省	深圳市
000021	长城开发	21	2009	0.0823306	0.133486	0.310859	C39	计算机、通信和其他电子设备制造业	广东省	深圳市
000021	长城开发	21	2010	0.0327273	0.0936652	0.76783	C39	计算机、通信和其他电子设备制造业	广东省	深圳市
000021	长城开发	21	2011	0.0626786	0.0920032	0.46831	C39	计算机、通信和其他电子设备制造业	广东省	深圳市
000021	长城开发	21	2012	0.0225914	0.0906314	0.29942	C39	计算机、通信和其他电子设备制造业	广东省	深圳市
000021	长城开发	21	2013	0.0357422	0.156227	-0.573201	C39	计算机、通信和其他电子设备制造业	广东省	深圳市
000021	深科技	21	2014	0.267589	0.11499	-0.218622	C39	计算机、通信和其他电子设备制造业	广东省	深圳市
000021	深科技	21	2015	0.91367	0.222472	-0.10377	C39	计算机、通信和其他电子设备制造业	广东省	深圳市
000021	深科技	21	2016	0.792351	0.154703	0.00296386	C39	计算机、通信和其他电子设备制造业	广东省	深圳市
000021	深科技	21	2017	0.853623	0.0621802	-0.223439	C39	计算机、通信和其他电子设备制造业	广东省	深圳市
000021	深科技	21	2018	0.274751	0.0843693	0.0699191	C39	计算机、通信和其他电子设备制造业	广东省	深圳市
000021	深科技	21	2019	0.154864	0.165012	-0.184535	C39	计算机、通信和其他电子设备制造业	广东省	深圳市
000021	深科技	21	2020	0.76588	0.123348	0.0757456	C39	计算机、通信和其他电子设备制造业	广东省	深圳市
000021	深科技	21	2021	0.523493	0.0784518	0.0427247	C39	计算机、通信和其他电子设备制造业	广东省	深圳市
000021	深科技	21	2022	0.816851	0.106299	0.289456	C39	计算机、通信和其他电子设备制造业	广东省	深圳市
000021	深科技	21	2023	0.611503	0.140457	-0.0702586	C39	计算机、通信和其他电子设备制造业	广东省	深圳市
000022	深赤湾A	22	2000	0.622278	0.0836341	0.00337004	G58	装卸搬运和运输代理业	广东省	深圳市
000022	深赤湾A	22	2001	0.418814	0.0766732	0.0157052	G58	装卸搬运和运输代理业	广东省	深圳市
000022	深赤湾A	22	2002	0.340747	0.122181	0.0359758	G58	装卸搬运和运输代理业	广东省	深圳市
000022	深赤湾A	22	2003	0.247468	0.0584717	0.0615665	G58	装卸搬运和运输代理业	广东省	深圳市
000022	深赤湾A	22	2004	0.0588596	0.085544	0.10768	G58	装卸搬运和运输代理业	广东省	深圳市
000022	深赤湾A	22	2005	0.0131433	0.105001	0.103565	G58	装卸搬运和运输代理业	广东省	深圳市
000022	深赤湾A	22	2006	0.0303739	0.0838135	0.0857477	G58	装卸搬运和运输代理业	广东省	深圳市
000022	深赤湾A	22	2007	0.0213128	0.103798	0.0450911	G58	装卸搬运和运输代理业	广东省	深圳市
000022	深赤湾A	22	2008	0.0559555	0.129705	0.0139673	G58	装卸搬运和运输代理业	广东省	深圳市
000022	深赤湾A	22	2009	0.0715126	0.0896972	-0.0439878	G58	装卸搬运和运输代理业	广东省	深圳市
000022	深赤湾A	22	2010	0.0217794	0.086624	-0.0263145	G58	装卸搬运和运输代理业	广东省	深圳市
000022	深赤湾A	22	2011	0.0582864	0.0969578	-0.0205871	G58	装卸搬运和运输代理业	广东省	深圳市
000022	深赤湾A	22	2012	0.0207843	0.0742977	0.0318412	G55	水上运输业	广东省	深圳市
000022	深赤湾A	22	2013	0.0412537	0.211182	0.00403572	G55	水上运输业	广东省	深圳市
000022	深赤湾A	22	2014	0.282016	0.0920091	0.00966293	G55	水上运输业	广东省	深圳市
000022	深赤湾A	22	2015	0.924231	0.148322	0.00887625	G55	水上运输业	广东省	深圳市
000022	深赤湾Ａ	22	2016	0.798886	0.150145	0.0124332	G55	水上运输业	广东省	深圳市
000022	深赤湾A	22	2017	0.840447	0.0959003	0.0651453	G55	水上运输业	广东省	深圳市
000023	深天地A	23	2000	0.43065	0.380864	0.0110136	E47	房屋建筑业	广东省	深圳市
000023	深天地A	23	2001	0.397222	0.114764	-0.00424292	E47	房屋建筑业	广东省	深圳市
000023	深天地A	23	2002	0.344389	0.110296	0.00348355	E47	房屋建筑业	广东省	深圳市
000023	深天地A	23	2003	0.225729	0.0848981	0.0153159	E47	房屋建筑业	广东省	深圳市
000023	深天地A	23	2004	0.0496526	0.115592	0.0271943	E47	房屋建筑业	广东省	深圳市
000023	G 深天地	23	2005	0.0114537	0.153075	0.00762584	E47	房屋建筑业	广东省	深圳市
000023	深天地A	23	2006	0.028329	0.107278	0.0253338	E47	房屋建筑业	广东省	深圳市
000023	深天地A	23	2007	0.0205476	0.233135	0.0131435	E47	房屋建筑业	广东省	深圳市
000023	深天地A	23	2008	0.055707	0.15133	0.0124117	E47	房屋建筑业	广东省	深圳市
000023	深天地A	23	2009	0.0731419	0.119459	0.0116771	E47	房屋建筑业	广东省	深圳市
000023	深天地A	23	2010	0.0224425	0.138525	0.0293207	E47	房屋建筑业	广东省	深圳市
000023	深天地A	23	2011	0.0587775	0.0827607	0.0263721	E47	房屋建筑业	广东省	深圳市
000023	深天地A	23	2012	0.0206178	0.0976759	0.00978177	C30	非金属矿物制品业	广东省	深圳市
000023	深天地A	23	2013	0.0419091	0.066	0.0149924	C30	非金属矿物制品业	广东省	深圳市
000023	深天地A	23	2014	0.269737	0.122572	0.0292207	C30	非金属矿物制品业	广东省	深圳市
000023	深天地A	23	2015	0.916185	0.20616	0.0159855	C30	非金属矿物制品业	广东省	深圳市
000023	深天地A	23	2016	0.867274	0.102379	-0.0059578	C30	非金属矿物制品业	广东省	深圳市
000023	深天地A	23	2017	0.843106	0.08916	0.0136832	C30	非金属矿物制品业	广东省	深圳市
000023	深天地A	23	2018	0.257242	0.111233	0.0573522	C30	非金属矿物制品业	广东省	深圳市
000023	深天地A	23	2019	0.150784	0.190889	0.0820574	C30	非金属矿物制品业	广东省	深圳市
000023	深天地A	23	2020	0.779748	0.11085	0.0553994	C30	非金属矿物制品业	广东省	深圳市
000023	深天地A	23	2021	0.529641	0.0547689	-0.0131452	C30	非金属矿物制品业	广东省	深圳市
000023	深天地A	23	2022	0.801257	0.132925	-0.14675	C30	非金属矿物制品业	广东省	深圳市
000024	招商局A	24	2000	0.653871	0.106484	0.131929	K70	房地产业	广东省	深圳市
000024	招商局A	24	2001	0.532737	0.0677505	0.272308	K70	房地产业	广东省	深圳市
000024	招商局A	24	2002	0.416604	0.115485	0.292369	K70	房地产业	广东省	深圳市
000024	招商局A	24	2003	0.269301	0.0627365	0.19216	K70	房地产业	广东省	深圳市
000024	招商地产	24	2004	0.0539552	0.094251	0.0155075	K70	房地产业	广东省	深圳市
000024	G 招商局	24	2005	0.0114537	0.101465	-0.119468	K70	房地产业	广东省	深圳市
000024	招商地产	24	2006	0.0226295	0.157409	-0.189943	K70	房地产业	广东省	深圳市
000024	招商地产	24	2007	0.0213008	0.258844	0.0635749	K70	房地产业	广东省	深圳市
000024	招商地产	24	2008	0.0574047	0.0980754	0.0913709	K70	房地产业	广东省	深圳市
000024	招商地产	24	2009	0.0948716	0.159317	0.71983	K70	房地产业	广东省	深圳市
000024	招商地产	24	2010	0.0353585	0.15268	0.967078	K70	房地产业	广东省	深圳市
000024	招商地产	24	2011	0.0688815	0.0762798	1.15382	K70	房地产业	广东省	深圳市
000024	招商地产	24	2012	0.0308491	0.10521	1.51591	K70	房地产业	广东省	深圳市
000024	招商地产	24	2013	0.0602265	0.104237	1.87854	K70	房地产业	广东省	深圳市
000024	招商地产	24	2014	0.29463	0.206608	2.82737	K70	房地产业	广东省	深圳市
000025	G 特力A	25	2005	0.0114537	0.136115	-0.0245511	S90	综合	广东省	深圳市
000025	特力A	25	2006	0.0225582	0.21091	-0.0302691	S90	综合	广东省	深圳市
000025	特力A	25	2007	0.0200283	0.281995	-0.0133709	S90	综合	广东省	深圳市
000025	特力A	25	2008	0.0548246	0.162468	-0.0405914	S90	综合	广东省	深圳市
000025	特力A	25	2009	0.0704933	0.161934	-0.0701016	S90	综合	广东省	深圳市
000025	特力A	25	2010	0.0212558	0.11245	-0.0604688	F51	批发业	广东省	深圳市
000025	特力A	25	2011	0.0581024	0.128326	-0.0234614	F51	批发业	广东省	深圳市
000025	特力A	25	2012	0.0205487	0.088804	-0.00130337	F51	批发业	广东省	深圳市
000025	特力A	25	2013	0.0418071	0.0800536	0.0100381	F51	批发业	广东省	深圳市
000025	特力A	25	2014	0.262859	0.137941	0.00617054	F51	批发业	广东省	深圳市
000025	特力A	25	2015	0.893935	0.365413	-0.0115916	F51	批发业	广东省	深圳市
000025	特力A	25	2016	0.81413	0.139483	-0.0162488	F51	批发业	广东省	深圳市
000025	特力A	25	2017	0.80881	0.169575	-0.011775	F51	批发业	广东省	深圳市
000025	特力A	25	2018	0.278707	0.0775536	0.0110512	F51	批发业	广东省	深圳市
000025	特力A	25	2019	0.175427	0.0855815	0.0246832	F51	批发业	广东省	深圳市
000025	特力A	25	2020	0.825541	0.0696202	0.00771819	F51	批发业	广东省	深圳市
000025	特力A	25	2021	0.533742	0.0404124	0.00942812	F51	批发业	广东省	深圳市
000025	特力A	25	2022	0.719652	0.280731	0.0266583	F51	批发业	广东省	深圳市
000025	特力A	25	2023	0.638738	0.0704837	0.142232	F51	批发业	广东省	深圳市
000026	飞亚达A	26	2000	0.581186	0.138239	-0.0114893	C35	专用设备制造业	广东省	深圳市
000026	飞亚达A	26	2001	0.410249	0.0661387	-0.0124182	C35	专用设备制造业	广东省	深圳市
000026	飞亚达A	26	2002	0.406418	0.0479089	-0.00735784	C35	专用设备制造业	广东省	深圳市
000026	飞亚达A	26	2003	0.234117	0.0616494	-0.00248951	C35	专用设备制造业	广东省	深圳市
000026	飞亚达A	26	2004	0.0478613	0.120595	0.00584331	C35	专用设备制造业	广东省	深圳市
000026	飞亚达A	26	2005	0.0114537	0.111611	0.0135263	C35	专用设备制造业	广东省	深圳市
000026	S 飞亚达A	26	2006	0.0274739	0.125505	0.0259108	C35	专用设备制造业	广东省	深圳市
000026	飞亚达A	26	2007	0.0212734	0.185091	0.0527026	C35	专用设备制造业	广东省	深圳市
000026	飞亚达A	26	2008	0.0565769	0.153936	0.0744901	C35	专用设备制造业	广东省	深圳市
000026	飞亚达A	26	2009	0.0751077	0.115513	0.0750157	C35	专用设备制造业	广东省	深圳市
000026	飞亚达A	26	2010	0.0234755	0.0933842	0.0975481	F52	零售业	广东省	深圳市
000026	飞亚达A	26	2011	0.0596287	0.12843	0.147465	F52	零售业	广东省	深圳市
000026	飞亚达A	26	2012	0.0217305	0.147243	0.178656	F52	零售业	广东省	深圳市
000026	飞亚达A	26	2013	0.0428761	0.117721	0.132274	F52	零售业	广东省	深圳市
000026	飞亚达A	26	2014	0.279371	0.101568	0.0717088	F52	零售业	广东省	深圳市
000026	飞亚达A	26	2015	0.914913	0.215256	0.0138234	F52	零售业	广东省	深圳市
000026	飞亚达A	26	2016	0.803453	0.146941	-0.0109632	F52	零售业	广东省	深圳市
000026	飞亚达A	26	2017	0.856222	0.0582473	0.00676669	F52	零售业	广东省	深圳市
000026	飞亚达A	26	2018	0.288636	0.0623871	0.0238254	F52	零售业	广东省	深圳市
000026	飞亚达	26	2019	0.170263	0.108776	0.0710346	F52	零售业	广东省	深圳市
000026	飞亚达	26	2020	0.517958	0.346061	0.089763	F52	零售业	广东省	深圳市
000026	飞亚达	26	2021	0.518102	0.101447	0.184328	F52	零售业	广东省	深圳市
000026	飞亚达	26	2022	0.824157	0.0923452	0.0649886	F52	零售业	广东省	深圳市
000026	飞亚达	26	2023	0.637943	0.0716885	0.032625	F52	零售业	广东省	深圳市
000027	深能源A	27	2000	0.640268	0.104549	0.0908537	D44	电力、热力生产和供应业	广东省	深圳市
000027	深能源A	27	2001	0.498548	0.0702384	0.19515	D44	电力、热力生产和供应业	广东省	深圳市
000027	深能源A	27	2002	0.415896	0.098644	0.224484	D44	电力、热力生产和供应业	广东省	深圳市
000027	深能源A	27	2003	0.270038	0.0823152	0.249661	D44	电力、热力生产和供应业	广东省	深圳市
000027	深能源A	27	2004	0.06551	0.0762291	0.249497	D44	电力、热力生产和供应业	广东省	深圳市
000027	深能源A	27	2005	0.0174099	0.103181	0.307982	D44	电力、热力生产和供应业	广东省	深圳市
000027	深能源A	27	2006	0.0330544	0.0690422	0.214041	D44	电力、热力生产和供应业	广东省	深圳市
000027	深圳能源	27	2007	0.0277343	0.132141	0.451386	D44	电力、热力生产和供应业	广东省	深圳市
000027	深圳能源	27	2008	0.0610592	0.138469	0.373451	D44	电力、热力生产和供应业	广东省	深圳市
000027	深圳能源	27	2009	0.0864207	0.143207	0.444363	D44	电力、热力生产和供应业	广东省	深圳市
000027	深圳能源	27	2010	0.0250585	0.0836705	0.210807	D44	电力、热力生产和供应业	广东省	深圳市
000027	深圳能源	27	2011	0.0618988	0.0803252	0.37441	D44	电力、热力生产和供应业	广东省	深圳市
000027	深圳能源	27	2012	0.0215643	0.0491368	0.143981	D44	电力、热力生产和供应业	广东省	深圳市
000027	深圳能源	27	2013	0.0416843	0.0562959	-0.0113929	D44	电力、热力生产和供应业	广东省	深圳市
000027	深圳能源	27	2014	0.277016	0.0938706	-0.188098	D44	电力、热力生产和供应业	广东省	深圳市
000027	深圳能源	27	2015	0.924534	0.13953	-0.16985	D44	电力、热力生产和供应业	广东省	深圳市
000027	深圳能源	27	2016	0.848407	0.115496	-0.103267	D44	电力、热力生产和供应业	广东省	深圳市
000027	深圳能源	27	2017	0.872293	0.0232684	0.303981	D44	电力、热力生产和供应业	广东省	深圳市
000027	深圳能源	27	2018	0.301867	0.0506341	0.739741	D44	电力、热力生产和供应业	广东省	深圳市
000027	深圳能源	27	2019	0.185686	0.0729159	0.949889	D44	电力、热力生产和供应业	广东省	深圳市
000027	深圳能源	27	2020	0.816805	0.0784603	0.490865	D44	电力、热力生产和供应业	广东省	深圳市
000027	深圳能源	27	2021	0.462448	0.330606	1.30422	D44	电力、热力生产和供应业	广东省	深圳市
000027	深圳能源	27	2022	0.833786	0.0805053	1.67077	D44	电力、热力生产和供应业	广东省	深圳市
000027	深圳能源	27	2023	0.655268	0.0420745	2.005	D44	电力、热力生产和供应业	广东省	深圳市
000028	深益力A	28	2000	0.538866	0.210594	0.00232807	C27	医药制造业	广东省	深圳市
000028	一致药业	28	2001	0.470722	0.104836	0.158024	C27	医药制造业	广东省	深圳市
000028	一致药业	28	2002	0.443456	0.0622018	0.185874	C27	医药制造业	广东省	深圳市
000028	一致药业	28	2003	0.248503	0.0951145	0.167297	C27	医药制造业	广东省	深圳市
000028	一致药业	28	2004	0.045329	0.129901	-0.00925897	C27	医药制造业	广东省	深圳市
000028	G 一致	28	2005	0.0114537	0.0762853	-0.0234369	C27	医药制造业	广东省	深圳市
000028	一致药业	28	2006	0.0346264	0.0927484	0.388674	C27	医药制造业	广东省	深圳市
000028	一致药业	28	2007	0.0288078	0.224858	0.530222	C27	医药制造业	广东省	深圳市
000028	一致药业	28	2008	0.0650701	0.168202	0.672478	C27	医药制造业	广东省	深圳市
000028	一致药业	28	2009	0.0891359	0.100024	0.528233	C27	医药制造业	广东省	深圳市
000028	一致药业	28	2010	0.0306488	0.102948	0.618612	F51	批发业	广东省	深圳市
000028	国药一致	28	2011	0.0645341	0.0937176	0.676999	F51	批发业	广东省	深圳市
000028	国药一致	28	2012	0.0253214	0.139474	0.706182	F51	批发业	广东省	深圳市
000028	国药一致	28	2013	0.0496671	0.106501	0.813504	F51	批发业	广东省	深圳市
000028	国药一致	28	2014	0.296998	0.100847	0.882399	F51	批发业	广东省	深圳市
000028	国药一致	28	2015	0.924534	0.141357	0.798138	F51	批发业	广东省	深圳市
000028	国药一致	28	2016	0.924534	0.0592685	2.0049	F51	批发业	广东省	深圳市
000028	国药一致	28	2017	0.862984	0.0586786	1.73093	F51	批发业	广东省	深圳市
000028	国药一致	28	2018	0.311764	0.0471384	1.71292	F51	批发业	广东省	深圳市
000028	国药一致	28	2019	0.181332	0.0954559	1.07973	F51	批发业	广东省	深圳市
000028	国药一致	28	2020	0.801123	0.0953152	1.83858	F51	批发业	广东省	深圳市
000028	国药一致	28	2021	0.541992	0.0709881	2.52354	F51	批发业	广东省	深圳市
000028	国药一致	28	2022	0.839399	0.0719946	2.13974	F51	批发业	广东省	深圳市
000028	国药一致	28	2023	0.604145	0.173228	1.5828	F51	批发业	广东省	深圳市
000029	深深房A	29	2000	0.508867	0.236735	-0.0333135	K70	房地产业	广东省	深圳市
000029	深深房A	29	2001	0.407809	0.0741877	-0.0117201	K70	房地产业	广东省	深圳市
000029	深深房A	29	2002	0.192229	0.252962	-0.0101106	K70	房地产业	广东省	深圳市
000029	深深房A	29	2003	0.210259	0.114156	0.0109543	K70	房地产业	广东省	深圳市
000029	深深房A	29	2004	0.0445137	0.134311	-0.00457096	K70	房地产业	广东省	深圳市
000029	G 深深房	29	2005	0.0114537	0.0996796	0.0104089	K70	房地产业	广东省	深圳市
000029	深深房A	29	2006	0.0270726	0.126461	0.00285105	K70	房地产业	广东省	深圳市
000029	深深房A	29	2007	0.0208882	0.176325	0.0274586	K70	房地产业	广东省	深圳市
000029	深深房A	29	2008	0.0552537	0.157327	-0.0146136	K70	房地产业	广东省	深圳市
000029	深深房A	29	2009	0.071632	0.257112	-0.0240712	K70	房地产业	广东省	深圳市
000029	深深房A	29	2010	0.0222887	0.13451	0.0175928	K70	房地产业	广东省	深圳市
000029	深深房A	29	2011	0.0589234	0.0638828	0.0320391	K70	房地产业	广东省	深圳市
000029	深深房A	29	2012	0.0207294	0.114845	0.0279967	K70	房地产业	广东省	深圳市
000029	深深房A	29	2013	0.042756	0.0898443	0.109543	K70	房地产业	广东省	深圳市
000029	深深房A	29	2014	0.270647	0.124567	0.110592	K70	房地产业	广东省	深圳市
000029	深深房A	29	2015	0.905625	0.28334	0.113322	K70	房地产业	广东省	深圳市
000029	深深房A	29	2016	0.801461	0.148354	0.0235541	K70	房地产业	广东省	深圳市
000029	深深房A	29	2020	0.848691	0.048866	0.0269097	K70	房地产业	广东省	深圳市
000029	深深房A	29	2021	0.52426	0.0725782	-0.0854397	K70	房地产业	广东省	深圳市
000029	深深房A	29	2022	0.79338	0.146981	-0.191436	K70	房地产业	广东省	深圳市
000029	深深房A	29	2023	0.640531	0.0637315	-0.108412	K70	房地产业	广东省	深圳市
000030	富奥股份	30	2013	0.0467758	0.109085	0.522632	C41	其他制造业	吉林省	长春市
000030	富奥股份	30	2014	0.291769	0.0938124	0.50099	C36	汽车制造业	吉林省	长春市
000030	富奥股份	30	2016	0.837068	0.123513	0.0629135	C36	汽车制造业	吉林省	长春市
000030	富奥股份	30	2017	0.861654	0.0474768	0.218325	C36	汽车制造业	吉林省	长春市
000030	富奥股份	30	2018	0.294493	0.0573217	0.352102	C36	汽车制造业	吉林省	长春市
000030	富奥股份	30	2019	0.181153	0.0745571	0.420687	C36	汽车制造业	吉林省	长春市
000030	富奥股份	30	2020	0.756305	0.132598	0.392017	C36	汽车制造业	吉林省	长春市
000030	富奥股份	30	2021	0.504368	0.158883	0.497567	C36	汽车制造业	吉林省	长春市
000030	富奥股份	30	2022	0.810943	0.116822	0.250671	C36	汽车制造业	吉林省	长春市
000030	富奥股份	30	2023	0.636557	0.0789077	0.47292	C36	汽车制造业	吉林省	长春市
000031	深宝恒A	31	2000	0.564011	0.16483	-0.0108932	K70	房地产业	广东省	深圳市
000031	深宝恒A	31	2001	0.399346	0.105469	-0.00665086	K70	房地产业	广东省	深圳市
000031	深宝恒A	31	2002	0.328716	0.127037	0.0100099	K70	房地产业	广东省	深圳市
000031	深宝恒A	31	2003	0.210757	0.109778	0.00171212	K70	房地产业	广东省	深圳市
000031	深宝恒A	31	2004	0.0447366	0.134451	0.00323579	K70	房地产业	广东省	深圳市
000031	G 宝恒	31	2005	0.0114537	0.143396	-0.00463727	K70	房地产业	广东省	深圳市
000031	中粮地产	31	2006	0.0252062	0.165392	0.00149441	K70	房地产业	广东省	深圳市
000031	中粮地产	31	2007	0.020988	0.290606	0.0478959	K70	房地产业	广东省	深圳市
000031	中粮地产	31	2008	0.0563512	0.17227	0.0721298	K70	房地产业	广东省	深圳市
000031	中粮地产	31	2009	0.0777098	0.192885	0.166774	K70	房地产业	广东省	深圳市
000031	中粮地产	31	2010	0.0238863	0.104788	0.12898	K70	房地产业	广东省	深圳市
000031	中粮地产	31	2011	0.0626014	0.0667879	0.445423	K70	房地产业	广东省	深圳市
000031	中粮地产	31	2012	0.0245724	0.112241	0.593135	K70	房地产业	广东省	深圳市
000031	中粮地产	31	2013	0.0496202	0.100555	0.806507	K70	房地产业	广东省	深圳市
000031	中粮地产	31	2014	0.240804	0.208712	0.349976	K70	房地产业	广东省	深圳市
000031	中粮地产	31	2015	0.911424	0.248129	0.555465	K70	房地产业	广东省	深圳市
000031	中粮地产	31	2016	0.858837	0.108743	0.784655	K70	房地产业	广东省	深圳市
000031	中粮地产	31	2017	0.844489	0.090514	0.500152	K70	房地产业	广东省	深圳市
000031	大悦城	31	2018	0.27674	0.0812054	0.0620032	K70	房地产业	广东省	深圳市
000031	大悦城	31	2019	0.184851	0.0969919	1.57614	K70	房地产业	广东省	深圳市
000031	大悦城	31	2020	0.821314	0.0784164	2.44029	K70	房地产业	广东省	深圳市
000031	大悦城	31	2021	0.541726	0.0798034	2.84949	K70	房地产业	广东省	深圳市
000031	大悦城	31	2022	0.804091	0.130314	0.579207	K70	房地产业	广东省	深圳市
000031	大悦城	31	2023	0.63357	0.081588	-0.166204	K70	房地产业	广东省	深圳市
000032	深桑达A	32	2000	0.646897	0.0905573	0.083887	C39	计算机、通信和其他电子设备制造业	广东省	深圳市
000032	深桑达A	32	2001	0.466528	0.0681549	0.119408	C39	计算机、通信和其他电子设备制造业	广东省	深圳市
000032	深桑达A	32	2002	0.397519	0.0722092	0.0536697	C39	计算机、通信和其他电子设备制造业	广东省	深圳市
000032	深桑达A	32	2003	0.220986	0.0933761	0.0126372	C39	计算机、通信和其他电子设备制造业	广东省	深圳市
000032	深桑达A	32	2004	0.0454857	0.128066	-0.0168272	C39	计算机、通信和其他电子设备制造业	广东省	深圳市
000032	深桑达A	32	2005	0.0114537	0.0887637	0.00880502	C39	计算机、通信和其他电子设备制造业	广东省	深圳市
000032	深桑达A	32	2006	0.0306618	0.0633487	0.041554	C39	计算机、通信和其他电子设备制造业	广东省	深圳市
000032	深桑达A	32	2007	0.0210555	0.183151	0.0387942	C39	计算机、通信和其他电子设备制造业	广东省	深圳市
000032	深桑达A	32	2008	0.0554299	0.192025	0.0226684	C39	计算机、通信和其他电子设备制造业	广东省	深圳市
000032	深桑达A	32	2009	0.0713552	0.134629	-0.044783	C39	计算机、通信和其他电子设备制造业	广东省	深圳市
000032	深桑达A	32	2010	0.0215286	0.105866	-0.0416634	C39	计算机、通信和其他电子设备制造业	广东省	深圳市
000032	深桑达A	32	2011	0.0586177	0.07111	0.00189442	C39	计算机、通信和其他电子设备制造业	广东省	深圳市
000032	深桑达A	32	2012	0.0207228	0.114881	0.0270189	C39	计算机、通信和其他电子设备制造业	广东省	深圳市
000032	深桑达A	32	2013	0.0416199	0.13769	0.013059	C39	计算机、通信和其他电子设备制造业	广东省	深圳市
000032	深桑达A	32	2014	0.242047	0.194656	0.134879	C39	计算机、通信和其他电子设备制造业	广东省	深圳市
000032	深桑达A	32	2015	0.914047	0.221926	0.0453183	F51	批发业	广东省	深圳市
000032	深桑达A	32	2016	0.839237	0.121983	0.0361863	F51	批发业	广东省	深圳市
000032	深桑达A	32	2017	0.84394	0.08579	-0.134976	F51	批发业	广东省	深圳市
000032	深桑达A	32	2018	0.251539	0.118892	-0.0369385	F51	批发业	广东省	深圳市
000032	深桑达A	32	2019	0.173875	0.0896855	-0.0486178	F51	批发业	广东省	深圳市
000032	深桑达A	32	2020	0.676368	0.203551	-0.0200259	F51	批发业	广东省	深圳市
000032	深桑达A	32	2021	0.532771	0.142702	4.1103	E49	建筑安装业	广东省	深圳市
000032	深桑达A	32	2022	0.73689	0.266607	4.95508	E49	建筑安装业	广东省	深圳市
000032	深桑达A	32	2023	0.621605	0.158836	5.47629	E49	建筑安装业	广东省	深圳市
000033	新都酒店A	33	2000	0.542571	0.202418	-0.00220898	H61	住宿业	广东省	深圳市
000033	新都酒店A	33	2001	0.389617	0.140678	-0.00141671	H61	住宿业	广东省	深圳市
000033	新都酒店A	33	2002	0.326891	0.125979	-0.000881419	H61	住宿业	广东省	深圳市
000033	新都酒店A	33	2003	0.216998	0.0952263	-0.00403727	H61	住宿业	广东省	深圳市
000033	新都酒店A	33	2004	0.047019	0.123157	-0.00277909	H61	住宿业	广东省	深圳市
000033	G 新都	33	2005	0.0114537	0.110186	-0.00135344	H61	住宿业	广东省	深圳市
000033	新都酒店	33	2006	0.0266732	0.13418	0.00068199	H61	住宿业	广东省	深圳市
000033	新都酒店	33	2007	0.0202875	0.255432	-0.000406053	H61	住宿业	广东省	深圳市
000033	新都酒店	33	2008	0.0554801	0.154325	-0.0011245	H61	住宿业	广东省	深圳市
000033	新都酒店	33	2009	0.072651	0.148563	-0.00144627	H61	住宿业	广东省	深圳市
000033	新都酒店	33	2010	0.0221432	0.0870674	0.00011055	H61	住宿业	广东省	深圳市
000033	新都酒店	33	2011	0.0583314	0.125154	0.000383961	H61	住宿业	广东省	深圳市
000033	新都酒店	33	2012	0.0205608	0.0891048	0.000505251	H61	住宿业	广东省	深圳市
000033	新都酒店	33	2013	0.0416463	0.0986561	0.000878344	H61	住宿业	广东省	深圳市
000034	深信泰丰	34	2002	0.335381	0.120163	0.0081852	S90	综合	广东省	深圳市
000034	深信泰丰	34	2003	0.216557	0.117486	0.0543631	S90	综合	广东省	深圳市
000034	深信泰丰	34	2004	0.0348984	0.165813	-0.0878012	S90	综合	广东省	深圳市
000034	深信泰丰	34	2011	0.058506	0.117129	0.0153968	S90	综合	广东省	深圳市
000034	深信泰丰	34	2012	0.0205934	0.151428	0.0117923	S90	综合	广东省	深圳市
000034	深信泰丰	34	2013	0.041908	0.061294	0.0130896	S90	综合	广东省	深圳市
000034	深信泰丰	34	2014	0.271652	0.116845	0.00753687	S90	综合	广东省	深圳市
000034	深信泰丰	34	2015	0.920817	0.172693	7.74785e-05	S90	综合	广东省	深圳市
000034	神州数码	34	2016	0.76194	0.178323	3.99981	F51	批发业	广东省	深圳市
000034	神州数码	34	2017	0.83112	0.175671	6.17069	F51	批发业	广东省	深圳市
000034	神州数码	34	2018	0.332207	0.093354	8.14	F51	批发业	广东省	深圳市
000034	神州数码	34	2019	0.197879	0.142535	4.62723	F51	批发业	广东省	深圳市
000034	神州数码	34	2020	0.808918	0.0906681	2.98445	F51	批发业	广东省	深圳市
000034	神州数码	34	2021	0.541505	0.109583	4.05268	F51	批发业	广东省	深圳市
000034	神州数码	34	2022	0.757771	0.221889	2.90766	F51	批发业	广东省	深圳市
000034	神州数码	34	2023	0.624645	0.128779	2.75634	F51	批发业	广东省	深圳市
000035	中科健A	35	2000	0.557872	0.21461	0.0620884	C39	计算机、通信和其他电子设备制造业	广东省	深圳市
000035	中科健A	35	2001	0.426609	0.173567	0.110109	C39	计算机、通信和其他电子设备制造业	广东省	深圳市
000035	中科健A	35	2002	0.437667	0.0846947	0.251471	C39	计算机、通信和其他电子设备制造业	广东省	深圳市
000035	中科健A	35	2003	0.254036	0.0901873	0.183985	C39	计算机、通信和其他电子设备制造业	广东省	深圳市
000035	中科健A	35	2004	0.0392775	0.163037	0.0282614	C39	计算机、通信和其他电子设备制造业	广东省	深圳市
000035	中国天楹	35	2014	0.294736	0.0637028	0.0545371	N77	生态保护和环境治理业	江苏省	南通市
000035	中国天楹	35	2015	0.918598	0.189668	0.0729504	N77	生态保护和环境治理业	江苏省	南通市
000035	中国天楹	35	2016	0.833411	0.126085	0.0939577	N77	生态保护和环境治理业	江苏省	南通市
000035	中国天楹	35	2017	0.858348	0.0541903	0.106091	N77	生态保护和环境治理业	江苏省	南通市
000035	中国天楹	35	2018	0.218661	0.171305	0.102148	N77	生态保护和环境治理业	江苏省	南通市
000035	中国天楹	35	2019	0.17529	0.143178	1.76066	N77	生态保护和环境治理业	江苏省	海安市
000035	中国天楹	35	2020	0.827321	0.0721688	2.02557	N77	生态保护和环境治理业	江苏省	海安市
000035	中国天楹	35	2021	0.525697	0.114557	1.87458	N77	生态保护和环境治理业	江苏省	海安市
000035	中国天楹	35	2022	0.77858	0.170247	-1.18804	N77	生态保护和环境治理业	江苏省	海安市
000035	中国天楹	35	2023	0.627234	0.0862007	-1.65439	N77	生态保护和环境治理业	江苏省	海安市
000036	华联控股	36	2000	0.632729	0.191571	0.227253	C17	纺织业	广东省	深圳市
000036	华联控股	36	2001	0.527073	0.0815506	0.270075	C17	纺织业	广东省	深圳市
000036	华联控股	36	2002	0.405457	0.116662	0.255443	C17	纺织业	广东省	深圳市
000036	华联控股	36	2003	0.231211	0.0787166	0.0282996	C17	纺织业	广东省	深圳市
000036	华联控股	36	2004	0.0465898	0.0926201	-0.222256	C17	纺织业	广东省	深圳市
000036	华联控股	36	2005	0.0114537	0.136804	-0.135565	C17	纺织业	广东省	深圳市
000036	华联控股	36	2006	0.0296054	0.158057	0.263962	C17	纺织业	广东省	深圳市
000036	华联控股	36	2007	0.0320076	0.188073	0.726358	C17	纺织业	广东省	深圳市
000036	华联控股	36	2008	0.0521928	0.158351	-0.225666	C17	纺织业	广东省	深圳市
000036	华联控股	36	2010	0.0122698	0.12937	-0.708976	K70	房地产业	广东省	深圳市
000036	华联控股	36	2011	0.0589458	0.0697015	0.0378304	K70	房地产业	广东省	深圳市
000036	华联控股	36	2012	0.0194137	0.195808	-0.157154	K70	房地产业	广东省	深圳市
000036	华联控股	36	2013	0.0407367	0.0951189	-0.0922779	K70	房地产业	广东省	深圳市
000036	华联控股	36	2014	0.277887	0.0998999	-0.0301459	K70	房地产业	广东省	深圳市
000036	华联控股	36	2015	0.920856	0.172498	0.00609081	K70	房地产业	广东省	深圳市
000036	华联控股	36	2016	0.866878	0.102778	0.197914	K70	房地产业	广东省	深圳市
000036	华联控股	36	2017	0.811844	0.166119	0.376648	K70	房地产业	广东省	深圳市
000036	华联控股	36	2018	0.246862	0.130095	0.292554	K70	房地产业	广东省	深圳市
000036	华联控股	36	2019	0.175865	0.0862075	0.0996881	K70	房地产业	广东省	深圳市
000036	华联控股	36	2020	0.799734	0.0925239	-0.126668	K70	房地产业	广东省	深圳市
000036	华联控股	36	2021	0.514019	0.108342	-0.145265	K70	房地产业	广东省	深圳市
000036	华联控股	36	2022	0.816749	0.1052	-0.0824678	K70	房地产业	广东省	深圳市
000036	华联控股	36	2023	0.639237	0.0662831	-0.213986	K70	房地产业	广东省	深圳市
000037	深南电A	37	2000	0.627343	0.0995124	0.0460484	D44	电力、热力生产和供应业	广东省	深圳市
000037	深南电A	37	2001	0.415765	0.15341	0.0691263	D44	电力、热力生产和供应业	广东省	深圳市
000037	深南电A	37	2002	0.4017	0.0807237	0.102219	D44	电力、热力生产和供应业	广东省	深圳市
000037	深南电A	37	2003	0.245671	0.075183	0.0974223	D44	电力、热力生产和供应业	广东省	深圳市
000037	深南电A	37	2004	0.0609861	0.079876	0.134862	D44	电力、热力生产和供应业	广东省	深圳市
000037	G 南电	37	2005	0.0138412	0.116072	0.140778	D44	电力、热力生产和供应业	广东省	深圳市
000037	深南电A	37	2006	0.032318	0.0799347	0.199782	D44	电力、热力生产和供应业	广东省	深圳市
000037	深南电A	37	2007	0.0222832	0.206854	0.118741	D44	电力、热力生产和供应业	广东省	深圳市
000037	深南电A	37	2008	0.0555856	0.163187	0.012587	D44	电力、热力生产和供应业	广东省	深圳市
000037	深南电A	37	2009	0.0665647	0.141599	-0.199392	D44	电力、热力生产和供应业	广东省	深圳市
000037	深南电A	37	2010	0.0192583	0.135232	-0.201839	D44	电力、热力生产和供应业	广东省	深圳市
000037	深南电A	37	2011	0.0577131	0.115883	-0.0740734	D44	电力、热力生产和供应业	广东省	深圳市
000037	深南电A	37	2012	0.020152	0.083372	-0.0602384	D44	电力、热力生产和供应业	广东省	深圳市
000037	深南电A	37	2013	0.0412042	0.0845012	-0.0491303	D44	电力、热力生产和供应业	广东省	深圳市
000037	深南电A	37	2014	0.274439	0.10367	-0.118172	D44	电力、热力生产和供应业	广东省	深圳市
000037	深南电A	37	2015	0.911837	0.23724	0.00795724	D44	电力、热力生产和供应业	广东省	深圳市
000037	深南电A	37	2017	0.847526	0.0794049	0.0811665	D44	电力、热力生产和供应业	广东省	深圳市
000037	深南电A	37	2018	0.261946	0.103934	0.0539919	D44	电力、热力生产和供应业	广东省	深圳市
000037	深南电A	37	2019	0.123996	0.29947	-0.0351511	D44	电力、热力生产和供应业	广东省	深圳市
000037	深南电A	37	2020	0.690933	0.190292	-0.106051	D44	电力、热力生产和供应业	广东省	深圳市
000037	深南电A	37	2021	0.501424	0.154884	-0.112776	D44	电力、热力生产和供应业	广东省	深圳市
000037	深南电A	37	2022	0.769159	0.191151	-0.052835	D44	电力、热力生产和供应业	广东省	深圳市
000037	深南电A	37	2023	0.597345	0.177976	-0.0395474	D44	电力、热力生产和供应业	广东省	深圳市
000038	深大通A	38	2001	0.391716	0.118982	-0.0136597	I64	互联网和相关服务	广东省	深圳市
000038	深大通A	38	2002	0.378108	0.0784382	0.00555534	I64	互联网和相关服务	广东省	深圳市
000038	深大通A	38	2003	0.228866	0.0891867	0.0441233	I64	互联网和相关服务	广东省	深圳市
000038	深大通A	38	2004	0.0422954	0.145568	0.00317441	I64	互联网和相关服务	广东省	深圳市
000038	深大通A	38	2005	0.0114537	0.161347	-0.012628	I64	互联网和相关服务	广东省	深圳市
000038	深大通A	38	2006	0.023756	0.179221	-0.0499841	I64	互联网和相关服务	广东省	深圳市
000038	深大通	38	2013	0.0412155	0.175753	-0.0132859	K70	房地产业	广东省	深圳市
000038	深大通	38	2014	0.286892	0.0803635	0.0114153	K70	房地产业	广东省	深圳市
000038	深大通	38	2015	0.924348	0.147501	0.0099194	K70	房地产业	广东省	深圳市
000038	深大通	38	2016	0.838153	0.122769	0.0860761	L72	商务服务业	广东省	深圳市
000038	深大通	38	2017	0.843003	0.0905007	0.129717	L72	商务服务业	广东省	深圳市
000038	深大通	38	2018	0.250039	0.124392	0.22639	L72	商务服务业	广东省	深圳市
000038	深大通	38	2019	0.119698	0.321307	0.080565	L72	商务服务业	广东省	深圳市
000038	深大通	38	2020	0.728892	0.156542	0.0619877	L72	商务服务业	广东省	深圳市
000038	深大通	38	2021	0.52187	0.082569	-0.0310233	L72	商务服务业	广东省	深圳市
000039	中集集团	39	2000	0.755646	0.135859	0.466148	C33	金属制品业	广东省	深圳市
000039	中集集团	39	2001	0.489418	0.0844806	0.185246	C33	金属制品业	广东省	深圳市
000039	中集集团	39	2002	0.495815	0.0641203	0.388182	C33	金属制品业	广东省	深圳市
000039	中集集团	39	2003	0.307385	0.0938395	0.484607	C33	金属制品业	广东省	深圳市
000039	中集集团	39	2004	0.114185	0.110612	1.98023	C33	金属制品业	广东省	深圳市
000039	中集集团	39	2005	0.0563963	0.12336	2.18806	C33	金属制品业	广东省	深圳市
000039	中集集团	39	2006	0.0564657	0.13615	1.93676	C33	金属制品业	广东省	深圳市
000039	中集集团	39	2007	0.0558836	0.150736	2.2193	C33	金属制品业	广东省	深圳市
000039	中集集团	39	2008	0.0795779	0.113549	1.6368	C33	金属制品业	广东省	深圳市
000039	中集集团	39	2009	0.0336196	0.12097	-1.26923	C33	金属制品业	广东省	深圳市
000039	中集集团	39	2010	0.026267	0.100024	0.300749	C33	金属制品业	广东省	深圳市
000039	中集集团	39	2011	0.0734025	0.111393	1.67978	C33	金属制品业	广东省	深圳市
000039	中集集团	39	2012	0.0435458	0.123387	3.38585	C33	金属制品业	广东省	深圳市
000039	中集集团	39	2013	0.0476032	0.120813	0.61061	C33	金属制品业	广东省	深圳市
000039	中集集团	39	2014	0.294737	0.091482	0.59458	C33	金属制品业	广东省	深圳市
000039	中集集团	39	2015	0.924534	0.148759	0.435175	C33	金属制品业	广东省	深圳市
000039	中集集团	39	2016	0.835126	0.124428	-0.676276	C33	金属制品业	广东省	深圳市
000039	中集集团	39	2017	0.854424	0.0683136	0.622907	C33	金属制品业	广东省	深圳市
000039	中集集团	39	2018	0.310644	0.0702604	3.48118	C33	金属制品业	广东省	深圳市
000039	中集集团	39	2019	0.202442	0.0853877	3.47037	C33	金属制品业	广东省	深圳市
000039	中集集团	39	2020	0.759104	0.132948	1.78592	C33	金属制品业	广东省	深圳市
000039	中集集团	39	2021	0.565944	0.0922524	7.01984	C33	金属制品业	广东省	深圳市
000039	中集集团	39	2022	0.842572	0.078091	5.57213	C33	金属制品业	广东省	深圳市
000039	中集集团	39	2023	0.648331	0.0713637	3.36504	C33	金属制品业	广东省	深圳市
000040	深鸿基A	40	2000	0.580847	0.14661	0.00269886	S90	综合	广东省	深圳市
000040	深鸿基A	40	2001	0.40913	0.0850221	-0.00012585	S90	综合	广东省	深圳市
000040	深鸿基A	40	2002	0.293277	0.149232	-0.0359007	S90	综合	广东省	深圳市
000040	G 深鸿基	40	2005	0.0115896	0.104958	0.0288916	S90	综合	广东省	深圳市
000040	深鸿基	40	2006	0.0284008	0.0921664	-0.016422	S90	综合	广东省	深圳市
000040	深鸿基	40	2007	0.0198863	0.205451	-0.0317702	S90	综合	广东省	深圳市
000040	深鸿基	40	2008	0.0548249	0.190768	-0.0201065	S90	综合	广东省	深圳市
000040	深鸿基	40	2009	0.0730124	0.171234	0.0124411	S90	综合	广东省	深圳市
000040	深鸿基	40	2010	0.0223468	0.152395	0.0244121	K70	房地产业	广东省	深圳市
000040	宝安地产	40	2011	0.0589634	0.0874881	0.0498521	K70	房地产业	广东省	深圳市
000040	宝安地产	40	2012	0.0206293	0.145092	0.0164168	K70	房地产业	广东省	深圳市
000040	宝安地产	40	2013	0.0418249	0.0588994	0.00378991	K70	房地产业	广东省	深圳市
000040	宝安地产	40	2014	0.29026	0.0727978	0.0219165	K70	房地产业	广东省	深圳市
000040	宝安地产	40	2015	0.904259	0.292668	0.0804842	K70	房地产业	广东省	深圳市
000040	东旭蓝天	40	2016	0.817198	0.137527	0.295839	K70	房地产业	广东省	深圳市
000040	东旭蓝天	40	2017	0.850303	0.0788248	0.709449	E48	土木工程建筑业	广东省	深圳市
000040	东旭蓝天	40	2018	0.259452	0.115612	0.701056	D44	电力、热力生产和供应业	广东省	深圳市
000040	东旭蓝天	40	2019	0.164537	0.140435	0.303226	D44	电力、热力生产和供应业	广东省	深圳市
000040	东旭蓝天	40	2020	0.833109	0.0618494	-0.46596	D44	电力、热力生产和供应业	广东省	深圳市
000040	东旭蓝天	40	2021	0.500389	0.149801	-0.479957	D44	电力、热力生产和供应业	广东省	深圳市
000040	东旭蓝天	40	2022	0.81038	0.115677	-0.376955	D44	电力、热力生产和供应业	广东省	深圳市
000040	东旭蓝天	40	2023	0.633299	0.0820415	-0.198195	D44	电力、热力生产和供应业	广东省	深圳市
000042	深长城A	42	2000	0.635447	0.0860482	0.0441098	K70	房地产业	广东省	深圳市
000042	深长城A	42	2001	0.439422	0.0515836	0.0436199	K70	房地产业	广东省	深圳市
000042	深长城A	42	2002	0.342435	0.1261	0.0574419	K70	房地产业	广东省	深圳市
000042	深长城A	42	2003	0.23202	0.0853837	0.0509175	K70	房地产业	广东省	深圳市
000042	深长城A	42	2004	0.0618585	0.0867319	0.208025	K70	房地产业	广东省	深圳市
000042	深长城A	42	2005	0.0114537	0.0893746	-0.0426091	K70	房地产业	广东省	深圳市
000042	深长城	42	2006	0.0245656	0.141915	-0.112102	K70	房地产业	广东省	深圳市
000042	深长城	42	2007	0.0165945	0.187296	-0.240501	K70	房地产业	广东省	深圳市
000042	深长城	42	2008	0.0552107	0.154172	-0.0198732	K70	房地产业	广东省	深圳市
000042	深长城	42	2009	0.0761286	0.249702	0.120968	K70	房地产业	广东省	深圳市
000042	深长城	42	2010	0.0225014	0.158125	0.0364516	K70	房地产业	广东省	深圳市
000042	深长城	42	2011	0.0590786	0.11404	0.0777565	K70	房地产业	广东省	深圳市
000042	深长城	42	2012	0.0210071	0.0851712	0.0657536	K70	房地产业	广东省	深圳市
000042	中洲控股	42	2013	0.0424232	0.0914533	0.0765641	K70	房地产业	广东省	深圳市
000042	中洲控股	42	2014	0.290961	0.0757232	0.1116	K70	房地产业	广东省	深圳市
000042	中洲控股	42	2015	0.922804	0.161834	0.234956	K70	房地产业	广东省	深圳市
000042	中洲控股	42	2016	0.85315	0.112598	0.590277	K70	房地产业	广东省	深圳市
000042	中洲控股	42	2017	0.863478	0.0464454	0.562143	K70	房地产业	广东省	深圳市
000042	中洲控股	42	2018	0.264709	0.10252	0.289429	K70	房地产业	广东省	深圳市
000042	中洲控股	42	2019	0.17815	0.0703756	-0.090259	K70	房地产业	广东省	深圳市
000042	中洲控股	42	2020	0.858468	0.0404493	0.204279	K70	房地产业	广东省	深圳市
000042	中洲控股	42	2021	0.523882	0.0777743	0.0734026	K70	房地产业	广东省	深圳市
000042	中洲控股	42	2022	0.80274	0.130712	-0.0130125	K70	房地产业	广东省	深圳市
000042	中洲控股	42	2023	0.633104	0.0816684	-0.307645	K70	房地产业	广东省	深圳市
000043	深南光A	43	2000	0.631978	0.0829971	0.0290156	S90	综合	广东省	深圳市
000043	深南光A	43	2001	0.40441	0.0963874	-0.00209175	S90	综合	广东省	深圳市
000043	深南光A	43	2002	0.330419	0.131636	0.0341684	S90	综合	广东省	深圳市
000043	深南光A	43	2003	0.220386	0.0816558	-0.0226456	S90	综合	广东省	深圳市
000043	深南光A	43	2004	0.0483001	0.121092	0.0227088	S90	综合	广东省	深圳市
000043	G 深南光	43	2005	0.0114537	0.148384	0.0306588	S90	综合	广东省	深圳市
000043	深南光A	43	2006	0.0294261	0.100588	0.0758646	S90	综合	广东省	深圳市
000043	中航地产	43	2007	0.0226957	0.150226	0.13759	S90	综合	广东省	深圳市
000043	中航地产	43	2008	0.0561113	0.154878	0.0429499	S90	综合	广东省	深圳市
000043	中航地产	43	2009	0.0737131	0.162111	0.0342792	S90	综合	广东省	深圳市
000043	中航地产	43	2010	0.0243472	0.127452	0.165681	K70	房地产业	广东省	深圳市
000043	中航地产	43	2011	0.060248	0.0826137	0.190907	K70	房地产业	广东省	深圳市
000043	中航地产	43	2012	0.0221391	0.191284	0.243358	K70	房地产业	广东省	深圳市
000043	中航地产	43	2013	0.0438608	0.114719	0.230523	K70	房地产业	广东省	深圳市
000043	中航地产	43	2014	0.223973	0.244186	0.252032	K70	房地产业	广东省	深圳市
000043	中航地产	43	2015	0.917102	0.201281	0.133343	K70	房地产业	广东省	深圳市
000043	中航地产	43	2016	0.754048	0.181453	0.009812	K70	房地产业	广东省	深圳市
000043	中航地产	43	2017	0.846392	0.0809877	-0.0332748	K70	房地产业	广东省	深圳市
000043	中航善达	43	2018	0.268125	0.0951226	0.113689	K70	房地产业	广东省	深圳市
000045	深纺织A	45	2000	0.640271	0.0588189	0.00824136	C17	纺织业	广东省	深圳市
000045	深纺织A	45	2001	0.421725	0.0723819	0.019059	C17	纺织业	广东省	深圳市
000045	深纺织A	45	2002	0.364331	0.096672	0.024922	C17	纺织业	广东省	深圳市
000045	深纺织A	45	2003	0.227776	0.0810322	0.0159068	C17	纺织业	广东省	深圳市
000045	深纺织A	45	2004	0.0331645	0.188262	0.0104508	C17	纺织业	广东省	深圳市
000045	深纺织A	45	2005	0.0114537	0.157309	-0.00654194	C17	纺织业	广东省	深圳市
000045	深纺织A	45	2006	0.026626	0.138335	0.0103819	C17	纺织业	广东省	深圳市
000045	深纺织A	45	2007	0.0204681	0.200378	0.00408774	C17	纺织业	广东省	深圳市
000045	深纺织A	45	2008	0.0554072	0.158997	-0.00279069	C17	纺织业	广东省	深圳市
000045	深纺织A	45	2009	0.0724146	0.17294	-0.00677104	C17	纺织业	广东省	深圳市
000045	深纺织A	45	2010	0.0223463	0.0872967	0.0148531	C17	纺织业	广东省	深圳市
000045	深纺织A	45	2011	0.0587751	0.0982851	0.034874	S90	综合	广东省	深圳市
000045	深纺织A	45	2012	0.0207687	0.133425	0.0357041	F51	批发业	广东省	深圳市
000045	深纺织A	45	2013	0.0419275	0.151426	0.0493297	F51	批发业	广东省	深圳市
000045	深纺织A	45	2014	0.251819	0.166758	0.0498059	F51	批发业	广东省	深圳市
000045	深纺织A	45	2015	0.917307	0.198433	0.0381632	C39	计算机、通信和其他电子设备制造业	广东省	深圳市
000045	深纺织A	45	2016	0.775455	0.166503	0.00671016	C39	计算机、通信和其他电子设备制造业	广东省	深圳市
000045	深纺织A	45	2017	0.844573	0.0858315	0.0264593	C39	计算机、通信和其他电子设备制造业	广东省	深圳市
000045	深纺织A	45	2018	0.275423	0.0825425	0.004561	C39	计算机、通信和其他电子设备制造业	广东省	深圳市
000045	深纺织A	45	2019	0.170692	0.107797	0.0959985	C39	计算机、通信和其他电子设备制造业	广东省	深圳市
000045	深纺织A	45	2020	0.779019	0.111521	0.0633419	C39	计算机、通信和其他电子设备制造业	广东省	深圳市
000045	深纺织A	45	2021	0.52667	0.0683377	0.102139	C39	计算机、通信和其他电子设备制造业	广东省	深圳市
000045	深纺织A	45	2022	0.778927	0.173947	0.0679803	C39	计算机、通信和其他电子设备制造业	广东省	深圳市
000045	深纺织A	45	2023	0.642293	0.0607604	0.0970714	C39	计算机、通信和其他电子设备制造业	广东省	深圳市
000046	光彩建设	46	2000	0.632877	0.0650034	-0.00101082	K70	房地产业	广东省	深圳市
000046	光彩建设	46	2001	0.414511	0.0775526	0.0064398	K70	房地产业	广东省	深圳市
000046	光彩建设	46	2002	0.345128	0.11793	0.0358133	K70	房地产业	广东省	深圳市
000046	光彩建设	46	2003	0.22273	0.096287	0.0300872	K70	房地产业	广东省	深圳市
000046	光彩建设	46	2004	0.0577374	0.0844384	0.0656657	K70	房地产业	广东省	深圳市
000046	泛海建设	46	2005	0.0114537	0.0704917	0.00917653	K70	房地产业	广东省	深圳市
000046	泛海建设	46	2006	0.0260175	0.172592	0.0761655	K70	房地产业	广东省	深圳市
000046	泛海建设	46	2007	0.0253146	0.264795	0.316074	K70	房地产业	广东省	深圳市
000046	泛海建设	46	2008	0.0560013	0.225826	0.0866464	K70	房地产业	广东省	深圳市
000046	泛海建设	46	2009	0.0757452	0.203696	0.10413	K70	房地产业	广东省	深圳市
000046	泛海建设	46	2010	0.0185167	0.147597	-0.253753	K70	房地产业	广东省	深圳市
000046	泛海建设	46	2011	0.0590482	0.0856694	0.0583144	K70	房地产业	北京市	北京市
000046	泛海建设	46	2012	0.0219009	0.175214	0.20664	K70	房地产业	北京市	北京市
000046	泛海建设	46	2013	0.0458908	0.103665	0.431237	K70	房地产业	北京市	北京市
000046	泛海控股	46	2014	0.260308	0.164649	0.405978	K70	房地产业	北京市	北京市
000046	泛海控股	46	2015	0.922021	0.171293	0.500197	K70	房地产业	北京市	北京市
000046	泛海控股	46	2016	0.893166	0.0850598	1.26841	K70	房地产业	北京市	北京市
000046	泛海控股	46	2017	0.871152	0.0252715	0.232233	K70	房地产业	北京市	北京市
000046	泛海控股	46	2018	0.259359	0.101901	-0.444007	K70	房地产业	北京市	北京市
000046	泛海控股	46	2019	0.150281	0.139073	-1.55961	K70	房地产业	北京市	北京市
000047	深中侨A	47	2000	0.611577	0.0908818	-0.0130953	K70	房地产业	广东省	深圳市
000048	中科创业	48	2000	0.528057	0.231731	0.010656	C13	农副食品加工业	广东省	深圳市
000048	G 康达尔	48	2005	0.0114537	0.11796	-0.0102747	C13	农副食品加工业	广东省	深圳市
000048	康达尔A	48	2006	0.0291733	0.077624	-0.0110365	C13	农副食品加工业	广东省	深圳市
000048	康达尔	48	2012	0.020572	0.0902984	0.00227312	C13	农副食品加工业	广东省	深圳市
000048	康达尔	48	2013	0.0418753	0.141548	0.0403098	C13	农副食品加工业	广东省	深圳市
000048	康达尔	48	2014	0.28788	0.0815883	0.0814624	C13	农副食品加工业	广东省	深圳市
000048	康达尔	48	2015	0.920104	0.179039	0.0848665	C13	农副食品加工业	广东省	深圳市
000048	康达尔	48	2016	0.923227	0.0633115	-0.000407526	C13	农副食品加工业	广东省	深圳市
000048	京基智农	48	2019	0.173846	0.102433	0.335749	C13	农副食品加工业	广东省	深圳市
000048	京基智农	48	2020	0.655024	0.223282	0.252189	C13	农副食品加工业	广东省	深圳市
000048	京基智农	48	2021	0.528141	0.0600163	-0.0215466	C13	农副食品加工业	广东省	深圳市
000048	京基智农	48	2022	0.8223	0.095843	0.107693	C13	农副食品加工业	广东省	深圳市
000048	京基智农	48	2023	0.635518	0.0845755	0.83455	C13	农副食品加工业	广东省	深圳市
000049	深万山A	49	2000	0.606167	0.106367	-6.41597e-05	C38	电气机械及器材制造业	广东省	深圳市
000049	深万山A	49	2001	0.377533	0.179183	0.000966496	C38	电气机械及器材制造业	广东省	深圳市
000049	深万山A	49	2002	0.316524	0.133709	-0.00951859	C38	电气机械及器材制造业	广东省	深圳市
000049	G 德赛	49	2005	0.0124091	0.0830518	0.0610029	C38	电气机械及器材制造业	广东省	深圳市
000049	德赛电池	49	2006	0.0300498	0.0900958	0.0840444	C38	电气机械及器材制造业	广东省	深圳市
000049	德赛电池	49	2007	0.021395	0.169764	0.0584291	C38	电气机械及器材制造业	广东省	深圳市
000049	德赛电池	49	2008	0.0550706	0.211186	0.0116572	C38	电气机械及器材制造业	广东省	深圳市
000049	德赛电池	49	2009	0.0727669	0.173582	0.00470895	C38	电气机械及器材制造业	广东省	深圳市
000049	德赛电池	49	2010	0.0226193	0.228971	0.0553601	C38	电气机械及器材制造业	广东省	深圳市
000049	德赛电池	49	2011	0.0596744	0.11565	0.145364	C38	电气机械及器材制造业	广东省	深圳市
000049	德赛电池	49	2012	0.0220494	0.16944	0.227894	C38	电气机械及器材制造业	广东省	深圳市
000049	德赛电池	49	2013	0.0446216	0.118208	0.308648	C38	电气机械及器材制造业	广东省	深圳市
000049	德赛电池	49	2014	0.293849	0.0843456	0.414328	C38	电气机械及器材制造业	广东省	深圳市
000049	德赛电池	49	2015	0.919047	0.19298	0.523895	C38	电气机械及器材制造业	广东省	深圳市
000049	德赛电池	49	2016	0.829215	0.129217	0.432191	C38	电气机械及器材制造业	广东省	深圳市
000049	德赛电池	49	2017	0.844588	0.0913203	0.609638	C38	电气机械及器材制造业	广东省	深圳市
000049	德赛电池	49	2018	0.291251	0.0687296	0.881505	C38	电气机械及器材制造业	广东省	深圳市
000049	德赛电池	49	2019	0.17113	0.134727	0.971828	C38	电气机械及器材制造业	广东省	深圳市
000049	德赛电池	49	2020	0.734519	0.152781	0.691185	C38	电气机械及器材制造业	广东省	深圳市
000049	德赛电池	49	2021	0.508982	0.135491	0.222162	C38	电气机械及器材制造业	广东省	深圳市
000049	德赛电池	49	2022	0.784907	0.164063	0.330644	C38	电气机械及器材制造业	广东省	深圳市
000049	德赛电池	49	2023	0.641017	0.0640511	0.0887094	C38	电气机械及器材制造业	广东省	深圳市
000050	深天马A	50	2000	0.629921	0.0755392	0.00985893	C39	计算机、通信和其他电子设备制造业	广东省	深圳市
000050	深天马A	50	2001	0.412867	0.0877304	0.0106576	C39	计算机、通信和其他电子设备制造业	广东省	深圳市
000050	深天马A	50	2002	0.378142	0.0784301	0.00565152	C39	计算机、通信和其他电子设备制造业	广东省	深圳市
000050	深天马A	50	2003	0.224372	0.0936444	0.0318166	C39	计算机、通信和其他电子设备制造业	广东省	深圳市
000050	深天马A	50	2004	0.0333943	0.197392	0.0791977	C39	计算机、通信和其他电子设备制造业	广东省	深圳市
000050	深天马A	50	2005	0.0125911	0.106986	0.0776899	C39	计算机、通信和其他电子设备制造业	广东省	深圳市
000050	深天马A	50	2006	0.0267304	0.161258	0.0875401	C39	计算机、通信和其他电子设备制造业	广东省	深圳市
000050	深天马A	50	2007	0.0215414	0.151151	0.0653055	C39	计算机、通信和其他电子设备制造业	广东省	深圳市
000050	深天马A	50	2008	0.055322	0.208869	0.027378	C39	计算机、通信和其他电子设备制造业	广东省	深圳市
000050	深天马A	50	2009	0.0748304	0.135318	0.0679266	C39	计算机、通信和其他电子设备制造业	广东省	深圳市
000050	深天马A	50	2010	0.0244481	0.127661	0.173024	C39	计算机、通信和其他电子设备制造业	广东省	深圳市
000050	深天马A	50	2011	0.0613041	0.1087	0.323871	C39	计算机、通信和其他电子设备制造业	广东省	深圳市
000050	深天马A	50	2012	0.0219137	0.230739	0.21431	C39	计算机、通信和其他电子设备制造业	广东省	深圳市
000050	深天马A	50	2013	0.0422278	0.222108	0.106517	C39	计算机、通信和其他电子设备制造业	广东省	深圳市
000050	深天马A	50	2014	0.237106	0.223826	0.47074	C39	计算机、通信和其他电子设备制造业	广东省	深圳市
000050	深天马A	50	2015	0.920516	0.183819	0.619646	C39	计算机、通信和其他电子设备制造业	广东省	深圳市
000050	深天马A	50	2016	0.782464	0.161975	0.621738	C39	计算机、通信和其他电子设备制造业	广东省	深圳市
000050	深天马A	50	2017	0.829645	0.12513	0.469014	C39	计算机、通信和其他电子设备制造业	广东省	深圳市
000050	深天马A	50	2018	0.290993	0.0807024	1.83815	C39	计算机、通信和其他电子设备制造业	广东省	深圳市
000050	深天马A	50	2019	0.160163	0.213036	1.95452	C39	计算机、通信和其他电子设备制造业	广东省	深圳市
000050	深天马A	50	2020	0.809708	0.0869536	1.52202	C39	计算机、通信和其他电子设备制造业	广东省	深圳市
000050	深天马A	50	2021	0.532679	0.0510738	0.291767	C39	计算机、通信和其他电子设备制造业	广东省	深圳市
000050	深天马A	50	2022	0.840206	0.0635716	0.116551	C39	计算机、通信和其他电子设备制造业	广东省	深圳市
000050	深天马A	50	2023	0.640708	0.0666098	0.303856	C39	计算机、通信和其他电子设备制造业	广东省	深圳市
000055	深圳方大	55	2000	0.616024	0.0927996	0.00265443	C33	金属制品业	广东省	深圳市
000055	深圳方大	55	2001	0.403648	0.0893858	-0.00937255	C33	金属制品业	广东省	深圳市
000055	方大A	55	2002	0.34423	0.109125	-0.00164358	C33	金属制品业	广东省	深圳市
000055	方大A	55	2003	0.215186	0.103339	0.00825098	C33	金属制品业	广东省	深圳市
000055	方大A	55	2004	0.0323948	0.19343	0.0216623	C33	金属制品业	广东省	深圳市
000055	G 方大	55	2005	0.0114537	0.153002	0.0169025	C33	金属制品业	广东省	深圳市
000055	方大A	55	2006	0.0258584	0.156271	0.0157356	C33	金属制品业	广东省	深圳市
000055	方大A	55	2007	0.0205026	0.163428	0.00166676	C33	金属制品业	广东省	深圳市
000055	方大A	55	2008	0.0548165	0.244023	0.0178222	C33	金属制品业	广东省	深圳市
000055	方大集团	55	2009	0.0733329	0.185127	0.0241621	C33	金属制品业	广东省	深圳市
000055	方大集团	55	2010	0.0228005	0.117417	0.0521686	C33	金属制品业	广东省	深圳市
000055	方大集团	55	2011	0.0590164	0.0885897	0.0564056	C33	金属制品业	广东省	深圳市
000055	方大集团	55	2012	0.0208743	0.10702	0.0484922	C33	金属制品业	广东省	深圳市
000055	方大集团	55	2013	0.0423185	0.071912	0.0585687	C33	金属制品业	广东省	深圳市
000055	方大集团	55	2014	0.286954	0.0826612	0.0589548	C33	金属制品业	广东省	深圳市
000055	方大集团	55	2015	0.910543	0.24808	0.115257	C33	金属制品业	广东省	深圳市
000055	方大集团	55	2016	0.747374	0.186254	0.245625	C33	金属制品业	广东省	深圳市
000055	方大集团	55	2017	0.846903	0.0810566	0.100915	C33	金属制品业	广东省	深圳市
000055	方大集团	55	2018	0.225083	0.160762	0.0498213	C33	金属制品业	广东省	深圳市
000055	方大集团	55	2019	0.163859	0.129383	-0.119812	C33	金属制品业	广东省	深圳市
000055	方大集团	55	2020	0.835518	0.0606497	0.00318256	C33	金属制品业	广东省	深圳市
000055	方大集团	55	2021	0.530861	0.0518812	0.0509044	C33	金属制品业	广东省	深圳市
000055	方大集团	55	2022	0.822851	0.0947675	0.0841226	C33	金属制品业	广东省	深圳市
000055	方大集团	55	2023	0.647653	0.0469268	0.131291	C33	金属制品业	广东省	深圳市
000056	深国商A	56	2000	0.617461	0.103273	0.0255438	F52	零售业	广东省	深圳市
000056	深国商A	56	2001	0.414655	0.095168	0.0206561	F52	零售业	广东省	深圳市
000056	深国商A	56	2002	0.310085	0.139084	-0.0126596	F52	零售业	广东省	深圳市
000056	深国商A	56	2003	0.208367	0.100924	-0.0354934	F52	零售业	广东省	深圳市
000056	深国商A	56	2004	0.0420016	0.143257	-0.0214778	F52	零售业	广东省	深圳市
000056	深国商A	56	2005	0.0114537	0.181927	0.000111394	F52	零售业	广东省	深圳市
000056	深国商	56	2006	0.027591	0.113176	-0.00435986	F52	零售业	广东省	深圳市
000056	深国商	56	2007	0.0201286	0.303523	-0.00440842	F52	零售业	广东省	深圳市
000056	深国商	56	2008	0.0545824	0.219387	-0.0161893	F52	零售业	广东省	深圳市
000056	深国商	56	2009	0.0726157	0.125168	-0.00483368	F52	零售业	广东省	深圳市
000056	深国商	56	2010	0.0220489	0.116452	-0.00242751	K70	房地产业	广东省	深圳市
000056	深国商	56	2011	0.0579433	0.200008	-0.000758951	K70	房地产业	广东省	深圳市
000056	深国商	56	2014	0.267449	0.126983	0.00794749	K70	房地产业	广东省	深圳市
000056	皇庭国际	56	2015	0.919711	0.180902	0.0187666	K70	房地产业	广东省	深圳市
000056	皇庭国际	56	2016	0.818015	0.136797	0.0290547	K70	房地产业	广东省	深圳市
000056	皇庭国际	56	2017	0.861294	0.0468276	0.0603333	K70	房地产业	广东省	深圳市
000056	皇庭国际	56	2018	0.197124	0.204124	0.0680823	K70	房地产业	广东省	深圳市
000056	皇庭国际	56	2019	0.155584	0.170095	0.0623124	L72	商务服务业	广东省	深圳市
000056	皇庭国际	56	2020	0.810711	0.0829212	-0.00165419	L72	商务服务业	广东省	深圳市
000056	皇庭国际	56	2021	0.484627	0.218152	-0.0194701	L72	商务服务业	广东省	深圳市
000056	皇庭国际	56	2022	0.768839	0.191813	-0.0285789	L72	商务服务业	广东省	深圳市
000056	皇庭国际	56	2023	0.608619	0.149011	0.0485975	L72	商务服务业	广东省	深圳市
000058	深赛格	58	2000	0.577401	0.184069	0.060857	C39	计算机、通信和其他电子设备制造业	广东省	深圳市
000058	深赛格	58	2001	0.416137	0.0887223	0.019006	C39	计算机、通信和其他电子设备制造业	广东省	深圳市
000058	深赛格	58	2002	0.27909	0.18049	0.0324019	C39	计算机、通信和其他电子设备制造业	广东省	深圳市
000058	深赛格	58	2003	0.222875	0.0855388	0.0015207	C39	计算机、通信和其他电子设备制造业	广东省	深圳市
000058	深赛格	58	2004	0.0506044	0.117083	0.0665666	C39	计算机、通信和其他电子设备制造业	广东省	深圳市
000058	深赛格	58	2005	0.0114537	0.165915	-0.0390686	C39	计算机、通信和其他电子设备制造业	广东省	深圳市
000058	深赛格	58	2006	0.0255528	0.144047	-0.0416031	C39	计算机、通信和其他电子设备制造业	广东省	深圳市
000058	深赛格	58	2007	0.0174586	0.176152	-0.187683	C39	计算机、通信和其他电子设备制造业	广东省	深圳市
000058	深赛格	58	2009	0.0673899	0.256854	-0.161598	L71	租赁业	广东省	深圳市
000058	深赛格	58	2010	0.0215922	0.141362	-0.0318695	L71	租赁业	广东省	深圳市
000058	深赛格	58	2011	0.0586139	0.0895367	0.0118839	L71	租赁业	广东省	深圳市
000058	深赛格	58	2012	0.0206366	0.144394	0.0174117	L72	商务服务业	广东省	深圳市
000058	深赛格	58	2013	0.0417626	0.119371	0.0204972	L72	商务服务业	广东省	深圳市
000058	深赛格	58	2014	0.292257	0.0681208	0.02445	L72	商务服务业	广东省	深圳市
000058	深赛格	58	2015	0.907143	0.271211	0.0277726	L72	商务服务业	广东省	深圳市
000058	深赛格	58	2016	0.855166	0.110842	0.0075026	L72	商务服务业	广东省	深圳市
000058	深赛格	58	2017	0.844075	0.0879813	0.129996	L72	商务服务业	广东省	深圳市
000058	深赛格	58	2018	0.248456	0.125142	0.0864254	L72	商务服务业	广东省	深圳市
000058	深赛格	58	2019	0.123082	0.307154	0.0820843	L72	商务服务业	广东省	深圳市
000058	深赛格	58	2020	0.739377	0.146879	-0.0577642	L72	商务服务业	广东省	深圳市
000058	深赛格	58	2021	0.522612	0.0815571	0.0388866	L72	商务服务业	广东省	深圳市
000058	深赛格	58	2022	0.802045	0.132126	0.0335576	L72	商务服务业	广东省	深圳市
000058	深赛格	58	2023	0.639545	0.0676487	0.05454	L72	商务服务业	广东省	深圳市
000059	辽通化工	59	2000	0.605073	0.0951002	-0.0234417	C25	石油加工、炼焦及核燃料加工业	广东省	深圳市
000059	辽通化工	59	2001	0.401825	0.0829728	-0.0186462	C25	石油加工、炼焦及核燃料加工业	广东省	深圳市
000059	辽通化工	59	2002	0.347461	0.105525	-0.0035692	C25	石油加工、炼焦及核燃料加工业	辽宁省	盘锦市
000059	辽通化工	59	2003	0.23639	0.0742461	0.044304	C25	石油加工、炼焦及核燃料加工业	辽宁省	盘锦市
000059	辽通化工	59	2004	0.0508518	0.114919	0.0595673	C25	石油加工、炼焦及核燃料加工业	辽宁省	盘锦市
000059	G 辽通	59	2005	0.0121229	0.0899072	0.0495246	C25	石油加工、炼焦及核燃料加工业	辽宁省	盘锦市
000059	辽通化工	59	2006	0.0291949	0.110602	0.0916352	C25	石油加工、炼焦及核燃料加工业	辽宁省	盘锦市
000059	辽通化工	59	2007	0.0230617	0.217918	0.168943	C25	石油加工、炼焦及核燃料加工业	辽宁省	盘锦市
000059	辽通化工	59	2008	0.0580982	0.155986	0.181235	C25	石油加工、炼焦及核燃料加工业	辽宁省	盘锦市
000059	辽通化工	59	2009	0.0738882	0.167935	0.0405139	C25	石油加工、炼焦及核燃料加工业	辽宁省	盘锦市
000059	辽通化工	59	2010	0.0504633	0.126585	2.05752	C25	石油加工、炼焦及核燃料加工业	辽宁省	盘锦市
000059	辽通化工	59	2011	0.0884429	0.156189	3.38882	C25	石油加工、炼焦及核燃料加工业	辽宁省	盘锦市
000059	辽通化工	59	2012	0.043037	0.136011	3.31232	C25	石油加工、炼焦及核燃料加工业	辽宁省	盘锦市
000059	华锦股份	59	2013	0.059071	0.107286	1.76306	C25	石油加工、炼焦及核燃料加工业	辽宁省	盘锦市
000059	华锦股份	59	2014	0.263677	0.168519	0.638813	C25	石油加工、炼焦及核燃料加工业	辽宁省	盘锦市
000059	华锦股份	59	2016	0.78633	0.158162	-1.2454	C25	石油加工、炼焦及核燃料加工业	辽宁省	盘锦市
000059	华锦股份	59	2017	0.827561	0.115896	-1.02314	C25	石油加工、炼焦及核燃料加工业	辽宁省	盘锦市
000059	华锦股份	59	2018	0.279234	0.0835931	0.577397	C25	石油加工、炼焦及核燃料加工业	辽宁省	盘锦市
000059	华锦股份	59	2019	0.188081	0.0661653	1.05044	C25	石油加工、炼焦及核燃料加工业	辽宁省	盘锦市
000059	华锦股份	59	2020	0.806901	0.0856734	-0.327634	C25	石油加工、炼焦及核燃料加工业	辽宁省	盘锦市
000059	华锦股份	59	2021	0.503708	0.153802	0.186902	C25	石油加工、炼焦及核燃料加工业	辽宁省	盘锦市
000059	华锦股份	59	2022	0.808623	0.123399	0.94538	C25	石油加工、炼焦及核燃料加工业	辽宁省	盘锦市
000059	华锦股份	59	2023	0.644368	0.0672429	1.57046	C25	石油加工、炼焦及核燃料加工业	辽宁省	盘锦市
000060	中金岭南	60	2000	0.683194	0.0992744	0.199906	C32	有色金属冶炼及压延加工业	广东省	深圳市
000060	中金岭南	60	2001	0.524879	0.0847767	0.267541	C32	有色金属冶炼及压延加工业	广东省	深圳市
000060	中金岭南	60	2002	0.307265	0.140273	-0.018549	C32	有色金属冶炼及压延加工业	广东省	深圳市
000060	中金岭南	60	2003	0.21202	0.106094	-0.00147347	C32	有色金属冶炼及压延加工业	广东省	深圳市
000060	中金岭南	60	2004	0.0540105	0.102944	0.0759269	C32	有色金属冶炼及压延加工业	广东省	深圳市
000060	G 中金	60	2005	0.0142572	0.0993888	0.155227	C32	有色金属冶炼及压延加工业	广东省	深圳市
000060	中金岭南	60	2006	0.0266959	0.244348	0.340466	C32	有色金属冶炼及压延加工业	广东省	深圳市
000060	中金岭南	60	2007	0.0279004	0.205204	0.470869	C32	有色金属冶炼及压延加工业	广东省	深圳市
000060	中金岭南	60	2008	0.0599615	0.17021	0.320449	C32	有色金属冶炼及压延加工业	广东省	深圳市
000060	中金岭南	60	2009	0.076537	0.217199	0.131092	C32	有色金属冶炼及压延加工业	广东省	深圳市
000060	中金岭南	60	2010	0.0238887	0.154018	0.136357	C32	有色金属冶炼及压延加工业	广东省	深圳市
000060	中金岭南	60	2011	0.0685405	0.082619	1.11923	C32	有色金属冶炼及压延加工业	广东省	深圳市
000060	中金岭南	60	2012	0.0279083	0.120793	1.08484	C32	有色金属冶炼及压延加工业	广东省	深圳市
000060	中金岭南	60	2013	0.0530054	0.104449	1.1497	C32	有色金属冶炼及压延加工业	广东省	深圳市
000060	中金岭南	60	2014	0.284539	0.115999	0.594008	C32	有色金属冶炼及压延加工业	广东省	深圳市
000060	中金岭南	60	2015	0.916782	0.199525	-0.146162	C32	有色金属冶炼及压延加工业	广东省	深圳市
000060	中金岭南	60	2016	0.793626	0.153449	-0.605861	C32	有色金属冶炼及压延加工业	广东省	深圳市
000060	中金岭南	60	2017	0.847119	0.0742804	-0.560753	C32	有色金属冶炼及压延加工业	广东省	深圳市
000060	中金岭南	60	2018	0.287579	0.0673903	0.302549	C32	有色金属冶炼及压延加工业	广东省	深圳市
000060	中金岭南	60	2019	0.184175	0.0734826	0.774141	C32	有色金属冶炼及压延加工业	广东省	深圳市
000060	中金岭南	60	2020	0.779483	0.113288	1.12595	C32	有色金属冶炼及压延加工业	广东省	深圳市
000060	中金岭南	60	2021	0.533386	0.100448	2.44858	C32	有色金属冶炼及压延加工业	广东省	深圳市
000060	中金岭南	60	2022	0.841962	0.0712083	3.25389	C32	有色金属冶炼及压延加工业	广东省	深圳市
000060	中金岭南	60	2023	0.640909	0.0922947	3.53703	C32	有色金属冶炼及压延加工业	广东省	深圳市
000061	农产品	61	2000	0.632807	0.127427	0.111576	F51	批发业	广东省	深圳市
000061	农产品	61	2001	0.465261	0.0676231	0.116057	F51	批发业	广东省	深圳市
000061	农产品	61	2002	0.383803	0.106713	0.1363	F51	批发业	广东省	深圳市
000061	农产品	61	2003	0.253992	0.0679128	0.122896	F51	批发业	广东省	深圳市
000061	农产品	61	2004	0.0543252	0.101404	0.0752123	F51	批发业	广东省	深圳市
000061	G 农产品	61	2005	0.0118759	0.108759	0.0439123	F51	批发业	广东省	深圳市
000061	农产品	61	2006	0.021121	0.225031	-0.0800081	F51	批发业	广东省	深圳市
000061	农产品	61	2007	0.0189657	0.245624	-0.0845344	F51	批发业	广东省	深圳市
000061	农产品	61	2008	0.0537443	0.165943	-0.112824	F51	批发业	广东省	深圳市
000061	农产品	61	2009	0.0714764	0.0866505	-0.0454515	F51	批发业	广东省	深圳市
000061	农产品	61	2010	0.0220742	0.0829971	-0.00548762	F51	批发业	广东省	深圳市
000061	农产品	61	2011	0.0589465	0.0938655	0.0515684	F51	批发业	广东省	深圳市
000061	农产品	61	2012	0.0208268	0.127116	0.0436022	L72	商务服务业	广东省	深圳市
000061	农产品	61	2013	0.0422941	0.134191	0.0797813	L72	商务服务业	广东省	深圳市
000061	农产品	61	2014	0.268782	0.122607	-0.0147434	L72	商务服务业	广东省	深圳市
000061	农产品	61	2015	0.922826	0.158356	0.00546738	L72	商务服务业	广东省	深圳市
000061	农产品	61	2016	0.892446	0.0847968	-0.0148555	L72	商务服务业	广东省	深圳市
000061	农产品	61	2017	0.860904	0.0479285	0.0798035	L72	商务服务业	广东省	深圳市
000061	农产品	61	2018	0.258685	0.108997	0.0565405	L72	商务服务业	广东省	深圳市
000061	农产品	61	2019	0.178458	0.074784	0.0832884	L72	商务服务业	广东省	深圳市
000061	农产品	61	2020	0.791995	0.099885	0.0728167	L72	商务服务业	广东省	深圳市
000061	农产品	61	2021	0.519289	0.0970049	0.179013	L72	商务服务业	广东省	深圳市
000061	农产品	61	2022	0.833021	0.0766489	0.150062	L72	商务服务业	广东省	深圳市
000061	农产品	61	2023	0.638042	0.0730409	0.231569	L72	商务服务业	广东省	深圳市
000062	深圳华强	62	2000	0.610618	0.0707493	-0.0521187	L71	租赁业	广东省	深圳市
000062	深圳华强	62	2001	0.393774	0.0669908	-0.0498718	L71	租赁业	广东省	深圳市
000062	深圳华强	62	2002	0.323974	0.116663	-0.0478302	L71	租赁业	广东省	深圳市
000062	深圳华强	62	2003	0.217045	0.0929123	-0.0101026	L71	租赁业	广东省	深圳市
000062	深圳华强	62	2004	0.0577115	0.100347	0.172319	L71	租赁业	广东省	深圳市
000062	深圳华强	62	2005	0.0158756	0.0969643	0.23219	L71	租赁业	广东省	深圳市
000062	深圳华强	62	2006	0.0309872	0.0995267	0.173735	L71	租赁业	广东省	深圳市
000062	深圳华强	62	2007	0.0207342	0.27019	0.0294405	L71	租赁业	广东省	深圳市
000062	深圳华强	62	2008	0.0540672	0.168983	-0.0882838	L71	租赁业	广东省	深圳市
000062	深圳华强	62	2009	0.0730358	0.129249	0.00917674	L71	租赁业	广东省	深圳市
000062	深圳华强	62	2010	0.0195724	0.0898904	-0.185723	L71	租赁业	广东省	深圳市
000062	深圳华强	62	2011	0.0575038	0.0917517	-0.111135	L71	租赁业	广东省	深圳市
000062	深圳华强	62	2012	0.0200813	0.149127	-0.0637944	L72	商务服务业	广东省	深圳市
000062	深圳华强	62	2013	0.0428848	0.195977	0.162904	L72	商务服务业	广东省	深圳市
000062	深圳华强	62	2014	0.286971	0.0897992	0.198496	L72	商务服务业	广东省	深圳市
000062	深圳华强	62	2015	0.899244	0.328174	0.0474685	L72	商务服务业	广东省	深圳市
000062	深圳华强	62	2016	0.772021	0.169103	0.346876	L72	商务服务业	广东省	深圳市
000062	深圳华强	62	2017	0.824375	0.138414	0.562959	F51	批发业	广东省	深圳市
000062	深圳华强	62	2018	0.282772	0.0829633	0.976607	F51	批发业	广东省	深圳市
000062	深圳华强	62	2019	0.184778	0.0744669	0.881068	F51	批发业	广东省	深圳市
000062	深圳华强	62	2020	0.798621	0.0954348	0.80331	F51	批发业	广东省	深圳市
000062	深圳华强	62	2021	0.526175	0.0942681	1.10409	F51	批发业	广东省	深圳市
000062	深圳华强	62	2022	0.825774	0.0925057	0.958602	F51	批发业	广东省	深圳市
000062	深圳华强	62	2023	0.645062	0.0561392	0.426274	F51	批发业	广东省	深圳市
000063	中兴通讯	63	2000	0.783337	0.0509396	0.389219	C39	计算机、通信和其他电子设备制造业	广东省	深圳市
000063	中兴通讯	63	2001	0.732928	0.0687384	0.736358	C39	计算机、通信和其他电子设备制造业	广东省	深圳市
000063	中兴通讯	63	2002	0.595634	0.0866609	0.847033	C39	计算机、通信和其他电子设备制造业	广东省	深圳市
000063	中兴通讯	63	2003	0.421959	0.10938	1.15126	C39	计算机、通信和其他电子设备制造业	广东省	深圳市
000063	中兴通讯	63	2004	0.0899425	0.125818	1.33661	C39	计算机、通信和其他电子设备制造业	广东省	深圳市
000063	G 中兴	63	2005	0.0329926	0.102884	1.05667	C39	计算机、通信和其他电子设备制造业	广东省	深圳市
000063	中兴通讯	63	2006	0.0386364	0.109392	0.699565	C39	计算机、通信和其他电子设备制造业	广东省	深圳市
000063	中兴通讯	63	2007	0.0398451	0.107091	1.2079	C39	计算机、通信和其他电子设备制造业	广东省	深圳市
000063	中兴通讯	63	2008	0.0877486	0.209799	2.27175	C39	计算机、通信和其他电子设备制造业	广东省	深圳市
000063	中兴通讯	63	2009	0.187746	0.0955418	3.72409	C39	计算机、通信和其他电子设备制造业	广东省	深圳市
000063	中兴通讯	63	2010	0.0710938	0.103234	3.54867	C39	计算机、通信和其他电子设备制造业	广东省	深圳市
000063	中兴通讯	63	2011	0.0959649	0.094629	4.1961	C39	计算机、通信和其他电子设备制造业	广东省	深圳市
000063	中兴通讯	63	2012	0.036791	0.148847	2.39468	C39	计算机、通信和其他电子设备制造业	广东省	深圳市
000063	中兴通讯	63	2013	0.0464998	0.114895	0.496985	C39	计算机、通信和其他电子设备制造业	广东省	深圳市
000063	中兴通讯	63	2014	0.288541	0.0511988	-0.478318	C39	计算机、通信和其他电子设备制造业	广东省	深圳市
000063	中兴通讯	63	2015	0.924534	0.162936	1.5967	C39	计算机、通信和其他电子设备制造业	广东省	深圳市
000063	中兴通讯	63	2016	0.88973	0.0882536	2.59995	C39	计算机、通信和其他电子设备制造业	广东省	深圳市
000063	中兴通讯	63	2017	0.857905	0.0801284	2.7344	C39	计算机、通信和其他电子设备制造业	广东省	深圳市
000063	中兴通讯	63	2018	0.171039	0.225796	-1.46732	C39	计算机、通信和其他电子设备制造业	广东省	深圳市
000063	中兴通讯	63	2019	0.148906	0.161596	-1.04966	C39	计算机、通信和其他电子设备制造业	广东省	深圳市
000063	中兴通讯	63	2020	0.763433	0.123877	-0.73646	C39	计算机、通信和其他电子设备制造业	广东省	深圳市
000063	中兴通讯	63	2021	0.540793	0.0844293	2.90085	C39	计算机、通信和其他电子设备制造业	广东省	深圳市
000063	中兴通讯	63	2022	0.835381	0.0829696	3.22178	C39	计算机、通信和其他电子设备制造业	广东省	深圳市
000063	中兴通讯	63	2023	0.618956	0.139894	2.28002	C39	计算机、通信和其他电子设备制造业	广东省	深圳市
000065	北方国际	65	2001	0.422569	0.109743	0.0504573	E48	土木工程建筑业	广东省	深圳市
000065	北方国际	65	2002	0.375078	0.0942114	0.0553904	E48	土木工程建筑业	广东省	深圳市
000065	北方国际	65	2003	0.255526	0.0459339	0.0712195	E48	土木工程建筑业	广东省	深圳市
000065	北方国际	65	2004	0.0566562	0.0951865	0.104977	E48	土木工程建筑业	广东省	深圳市
000065	G 北方	65	2005	0.0117956	0.124841	0.0453902	E48	土木工程建筑业	广东省	深圳市
000065	北方国际	65	2006	0.0280392	0.120128	0.0460259	E48	土木工程建筑业	广东省	深圳市
000065	北方国际	65	2007	0.019162	0.27928	-0.0680456	E48	土木工程建筑业	北京市	北京市
000065	北方国际	65	2008	0.0549735	0.184826	-0.0141174	E48	土木工程建筑业	北京市	北京市
000065	北方国际	65	2009	0.0734627	0.28587	0.0380218	E48	土木工程建筑业	北京市	北京市
000065	北方国际	65	2010	0.0231782	0.112753	0.0788464	E48	土木工程建筑业	北京市	北京市
000065	北方国际	65	2011	0.0598157	0.100698	0.152733	E48	土木工程建筑业	北京市	北京市
000065	北方国际	65	2012	0.0204114	0.0900567	-0.0213735	E48	土木工程建筑业	北京市	北京市
000065	北方国际	65	2013	0.0424622	0.17669	0.11291	E48	土木工程建筑业	北京市	北京市
000065	北方国际	65	2014	0.283603	0.0897081	0.0391744	E48	土木工程建筑业	北京市	北京市
000065	北方国际	65	2015	0.911829	0.240983	0.262522	E48	土木工程建筑业	北京市	北京市
000065	北方国际	65	2016	0.895942	0.0827109	0.580367	E48	土木工程建筑业	北京市	北京市
000065	北方国际	65	2017	0.823828	0.14072	0.670593	E48	土木工程建筑业	北京市	北京市
000065	北方国际	65	2018	0.261271	0.111215	0.569584	E48	土木工程建筑业	北京市	北京市
000065	北方国际	65	2019	0.17032	0.113755	0.229825	E48	土木工程建筑业	北京市	北京市
000065	北方国际	65	2020	0.835168	0.0615989	0.312062	E48	土木工程建筑业	北京市	北京市
000065	北方国际	65	2021	0.505981	0.148433	0.30686	E48	土木工程建筑业	北京市	北京市
000065	北方国际	65	2022	0.767419	0.195289	0.23731	E48	土木工程建筑业	北京市	北京市
000065	北方国际	65	2023	0.592806	0.19725	0.863724	E48	土木工程建筑业	北京市	北京市
000066	长城电脑	66	2000	0.644953	0.131036	0.151651	C39	计算机、通信和其他电子设备制造业	广东省	深圳市
000066	长城电脑	66	2001	0.459937	0.0766935	0.110884	C39	计算机、通信和其他电子设备制造业	广东省	深圳市
000066	长城电脑	66	2002	0.379989	0.0716877	-0.0135982	C39	计算机、通信和其他电子设备制造业	广东省	深圳市
000066	长城电脑	66	2003	0.194759	0.114013	-0.0738767	C39	计算机、通信和其他电子设备制造业	广东省	深圳市
000066	长城电脑	66	2004	0.0433466	0.136888	-0.0230954	C39	计算机、通信和其他电子设备制造业	广东省	深圳市
000066	长城电脑	66	2005	0.0129929	0.0869838	0.0903574	C39	计算机、通信和其他电子设备制造业	广东省	深圳市
000066	长城电脑	66	2006	0.0324035	0.0679438	0.168501	C39	计算机、通信和其他电子设备制造业	广东省	深圳市
000066	长城电脑	66	2007	0.0242421	0.208909	0.241866	C39	计算机、通信和其他电子设备制造业	广东省	深圳市
000066	长城电脑	66	2008	0.0576048	0.16096	0.150691	C39	计算机、通信和其他电子设备制造业	广东省	深圳市
000066	长城电脑	66	2009	0.132721	0.16689	1.94737	C39	计算机、通信和其他电子设备制造业	广东省	深圳市
000066	长城电脑	66	2010	0.131413	0.111903	7.91976	C39	计算机、通信和其他电子设备制造业	广东省	深圳市
000066	长城电脑	66	2011	0.123284	0.0899988	7.25178	C39	计算机、通信和其他电子设备制造业	广东省	深圳市
000066	长城电脑	66	2012	0.0593479	0.0948278	5.70785	C39	计算机、通信和其他电子设备制造业	广东省	深圳市
000066	长城电脑	66	2013	0.0359822	0.130964	-0.558579	C39	计算机、通信和其他电子设备制造业	广东省	深圳市
000066	长城电脑	66	2014	0.256997	0.155525	0.073741	C39	计算机、通信和其他电子设备制造业	广东省	深圳市
000066	长城电脑	66	2015	0.889274	0.389156	-0.681577	C39	计算机、通信和其他电子设备制造业	广东省	深圳市
000066	长城电脑	66	2016	0.809641	0.142107	-0.873047	C39	计算机、通信和其他电子设备制造业	广东省	深圳市
000066	中国长城	66	2017	0.800666	0.124711	-6.76985	C39	计算机、通信和其他电子设备制造业	广东省	深圳市
000066	中国长城	66	2018	0.196217	0.128578	-6.29264	C39	计算机、通信和其他电子设备制造业	广东省	深圳市
000066	中国长城	66	2019	0.107845	0.176988	-5.82844	C39	计算机、通信和其他电子设备制造业	广东省	深圳市
000066	中国长城	66	2020	0.7148	0.170087	0.493925	C39	计算机、通信和其他电子设备制造业	广东省	深圳市
000066	中国长城	66	2021	0.514422	0.129113	0.778095	C39	计算机、通信和其他电子设备制造业	广东省	深圳市
000066	中国长城	66	2022	0.795389	0.145112	0.318355	C39	计算机、通信和其他电子设备制造业	广东省	深圳市
000066	中国长城	66	2023	0.626827	0.0998553	-0.102585	C39	计算机、通信和其他电子设备制造业	广东省	深圳市
000068	赛格三星	68	2000	0.62402	0.101701	0.0408243	C39	计算机、通信和其他电子设备制造业	广东省	深圳市
000068	赛格三星	68	2001	0.437956	0.0955489	0.0748797	C39	计算机、通信和其他电子设备制造业	广东省	深圳市
000068	赛格三星	68	2002	0.338595	0.12044	0.0212206	C39	计算机、通信和其他电子设备制造业	广东省	深圳市
000068	赛格三星	68	2003	0.221594	0.0824937	-0.0137767	C39	计算机、通信和其他电子设备制造业	广东省	深圳市
000068	赛格三星	68	2004	0.0383324	0.173839	0.0721333	C39	计算机、通信和其他电子设备制造业	广东省	深圳市
000068	赛格三星	68	2005	0.012876	0.133554	0.100197	C39	计算机、通信和其他电子设备制造业	广东省	深圳市
000068	赛格三星	68	2006	0.0264394	0.172193	0.10227	C39	计算机、通信和其他电子设备制造业	广东省	深圳市
000068	赛格三星	68	2007	0.020604	0.208491	0.0136184	C39	计算机、通信和其他电子设备制造业	广东省	深圳市
000068	赛格三星	68	2008	0.0560564	0.132238	0.0227812	C39	计算机、通信和其他电子设备制造业	广东省	深圳市
000068	赛格三星	68	2009	0.0679814	0.198995	-0.147971	C39	计算机、通信和其他电子设备制造业	广东省	深圳市
000068	华控赛格	68	2013	0.0422237	0.114854	0.0653271	C39	计算机、通信和其他电子设备制造业	广东省	深圳市
000068	华控赛格	68	2014	0.287521	0.0785834	0.00623808	C39	计算机、通信和其他电子设备制造业	广东省	深圳市
000068	华控赛格	68	2016	0.841769	0.120167	-0.0424194	C39	计算机、通信和其他电子设备制造业	广东省	深圳市
000068	华控赛格	68	2017	0.849619	0.0740414	0.0345735	C39	计算机、通信和其他电子设备制造业	广东省	深圳市
000068	华控赛格	68	2018	0.204747	0.19158	0.00352795	C39	计算机、通信和其他电子设备制造业	广东省	深圳市
000068	华控赛格	68	2019	0.121202	0.312112	-0.00724775	C39	计算机、通信和其他电子设备制造业	广东省	深圳市
000068	华控赛格	68	2020	0.80646	0.0867053	-0.018425	M74	专业技术服务业	广东省	深圳市
000068	华控赛格	68	2021	0.525104	0.073325	0.0729941	M74	专业技术服务业	广东省	深圳市
000068	华控赛格	68	2022	0.795398	0.144304	0.0883504	M74	专业技术服务业	广东省	深圳市
000068	华控赛格	68	2023	0.632079	0.0874227	0.0692492	M74	专业技术服务业	广东省	深圳市
000069	华侨城A	69	2000	0.627529	0.0732456	-0.000892309	L72	商务服务业	广东省	深圳市
000069	华侨城A	69	2001	0.418703	0.0606579	0.00282693	L72	商务服务业	广东省	深圳市
000069	华侨城A	69	2002	0.42818	0.0369807	0.0313	L72	商务服务业	广东省	深圳市
000069	华侨城A	69	2003	0.244459	0.0545935	0.0345812	L72	商务服务业	广东省	深圳市
000069	华侨城A	69	2004	0.0557136	0.0893858	0.0367774	L72	商务服务业	广东省	深圳市
000069	华侨城A	69	2005	0.0114537	0.104365	0.00621698	L72	商务服务业	广东省	深圳市
000069	华侨城A	69	2006	0.0296867	0.112391	0.128994	L72	商务服务业	广东省	深圳市
000069	华侨城A	69	2007	0.0222074	0.227255	0.116518	L72	商务服务业	广东省	深圳市
000069	华侨城A	69	2008	0.0599001	0.124976	0.283489	L72	商务服务业	广东省	深圳市
000069	华侨城A	69	2009	0.100974	0.153283	0.917041	L72	商务服务业	广东省	深圳市
000069	华侨城A	69	2010	0.0436118	0.110771	1.55885	L72	商务服务业	广东省	深圳市
000069	华侨城A	69	2011	0.0708958	0.0834241	1.38335	L72	商务服务业	广东省	深圳市
000069	华侨城A	69	2012	0.0282455	0.104383	1.13275	N78	公共设施管理业	广东省	深圳市
000069	华侨城A	69	2013	0.0523721	0.0994396	1.08387	N78	公共设施管理业	广东省	深圳市
000069	华侨城A	69	2014	0.302273	0.111663	1.3394	N78	公共设施管理业	广东省	深圳市
000069	华侨城A	69	2015	0.924534	0.148336	0.99519	N78	公共设施管理业	广东省	深圳市
000069	华侨城A	69	2016	0.878541	0.0949521	0.732472	N78	公共设施管理业	广东省	深圳市
000069	华侨城A	69	2017	0.852458	0.0780453	1.1623	N78	公共设施管理业	广东省	深圳市
000069	华侨城A	69	2018	0.277765	0.0981174	1.5906	K70	房地产业	广东省	深圳市
000069	华侨城A	69	2019	0.19898	0.0665422	2.45439	K70	房地产业	广东省	深圳市
000069	华侨城A	69	2020	0.81473	0.087438	3.95269	K70	房地产业	广东省	深圳市
000069	华侨城A	69	2021	0.540005	0.14854	5.44413	K70	房地产业	广东省	深圳市
000069	华侨城A	69	2022	0.788306	0.162558	1.67421	K70	房地产业	广东省	深圳市
000069	华侨城A	69	2023	0.629652	0.0720661	-2.61239	K70	房地产业	广东省	深圳市
000070	特发信息	70	2003	0.213009	0.100826	-0.0104742	C39	计算机、通信和其他电子设备制造业	广东省	深圳市
000070	特发信息	70	2004	0.0421167	0.143574	-0.0157982	C39	计算机、通信和其他电子设备制造业	广东省	深圳市
000070	特发信息	70	2005	0.0114537	0.139338	-0.00896373	C39	计算机、通信和其他电子设备制造业	广东省	深圳市
000070	特发信息	70	2006	0.0295912	0.0736893	0.0039555	C39	计算机、通信和其他电子设备制造业	广东省	深圳市
000070	特发信息	70	2007	0.0203727	0.243143	0.0034145	C39	计算机、通信和其他电子设备制造业	广东省	深圳市
000070	特发信息	70	2008	0.0558936	0.157712	0.0299372	C39	计算机、通信和其他电子设备制造业	广东省	深圳市
000070	特发信息	70	2009	0.0739487	0.106128	0.036549	C39	计算机、通信和其他电子设备制造业	广东省	深圳市
000070	特发信息	70	2010	0.0228589	0.0930864	0.0528397	C39	计算机、通信和其他电子设备制造业	广东省	深圳市
000070	特发信息	70	2011	0.0588575	0.11649	0.0543883	C39	计算机、通信和其他电子设备制造业	广东省	深圳市
000070	特发信息	70	2012	0.021045	0.109736	0.0738974	C38	电气机械及器材制造业	广东省	深圳市
000070	特发信息	70	2013	0.0420406	0.125318	0.0508232	C38	电气机械及器材制造业	广东省	深圳市
000070	特发信息	70	2014	0.298681	0.0548289	0.0666392	C38	电气机械及器材制造业	广东省	深圳市
000070	特发信息	70	2015	0.89079	0.389361	0.083971	C38	电气机械及器材制造业	广东省	深圳市
000070	特发信息	70	2016	0.812258	0.140981	0.304047	C38	电气机械及器材制造业	广东省	深圳市
000070	特发信息	70	2017	0.842153	0.0946422	0.355982	C38	电气机械及器材制造业	广东省	深圳市
000070	特发信息	70	2018	0.281981	0.0763082	0.32562	C38	电气机械及器材制造业	广东省	深圳市
000070	特发信息	70	2019	0.129076	0.278369	-0.028406	C38	电气机械及器材制造业	广东省	深圳市
000070	特发信息	70	2020	0.794266	0.0975416	-0.0750646	C38	电气机械及器材制造业	广东省	深圳市
000070	特发信息	70	2021	0.517236	0.0974687	-0.111516	C38	电气机械及器材制造业	广东省	深圳市
000070	特发信息	70	2022	0.799386	0.13676	-0.0136747	C38	电气机械及器材制造业	广东省	深圳市
000070	特发信息	70	2023	0.620233	0.118219	0.0214861	C38	电气机械及器材制造业	广东省	深圳市
000078	海王生物	78	2001	0.444462	0.0703269	0.0700575	C27	医药制造业	广东省	深圳市
000078	海王生物	78	2002	0.389169	0.0855052	0.0741036	C27	医药制造业	广东省	深圳市
000078	海王生物	78	2003	0.237536	0.101774	0.125743	C27	医药制造业	广东省	深圳市
000078	海王生物	78	2004	0.0607475	0.0840473	0.15569	C27	医药制造业	广东省	深圳市
000078	G 海王	78	2005	0.0148788	0.0926413	0.182856	C27	医药制造业	广东省	深圳市
000078	海王生物	78	2006	0.0297824	0.108564	0.123437	C27	医药制造业	广东省	深圳市
000078	海王生物	78	2007	0.0206951	0.19214	0.0173055	C27	医药制造业	广东省	深圳市
000078	海王生物	78	2008	0.0546927	0.169513	-0.0446192	C27	医药制造业	广东省	深圳市
000078	海王生物	78	2009	0.0726148	0.195994	0.00192584	C27	医药制造业	广东省	深圳市
000078	海王生物	78	2010	0.0242138	0.089069	0.150405	C27	医药制造业	广东省	深圳市
000078	海王生物	78	2011	0.061301	0.0835707	0.309323	C27	医药制造业	广东省	深圳市
000078	海王生物	78	2012	0.0230794	0.0865771	0.370798	F52	零售业	广东省	深圳市
000078	海王生物	78	2013	0.0454328	0.141616	0.399438	F52	零售业	广东省	深圳市
000078	海王生物	78	2014	0.298638	0.0746422	0.449732	F52	零售业	广东省	深圳市
000078	海王生物	78	2015	0.905782	0.287379	0.469971	F52	零售业	广东省	深圳市
000078	海王生物	78	2016	0.834718	0.125451	0.561249	F52	零售业	广东省	深圳市
000078	海王生物	78	2017	0.866458	0.0484492	1.51373	F52	零售业	广东省	深圳市
000078	海王生物	78	2018	0.286904	0.0977576	2.72632	F52	零售业	广东省	深圳市
000078	海王生物	78	2019	0.188198	0.122774	2.78868	F52	零售业	广东省	深圳市
000078	海王生物	78	2020	0.727234	0.161004	1.50829	F52	零售业	广东省	深圳市
000078	海王生物	78	2021	0.529329	0.0626568	0.267268	F52	零售业	广东省	深圳市
000078	海王生物	78	2022	0.818988	0.100187	-0.365785	F52	零售业	广东省	深圳市
000078	海王生物	78	2023	0.653884	0.0265386	-0.360373	F52	零售业	广东省	深圳市
000088	盐田港A	88	2000	0.624571	0.0774119	-0.0015378	G58	装卸搬运和运输代理业	广东省	深圳市
000088	盐田港A	88	2001	0.425578	0.0506035	0.0108108	G58	装卸搬运和运输代理业	广东省	深圳市
000088	盐田港A	88	2002	0.40226	0.0609953	0.0278677	G58	装卸搬运和运输代理业	广东省	深圳市
000088	盐田港A	88	2003	0.237454	0.0684424	0.0342447	G58	装卸搬运和运输代理业	广东省	深圳市
000088	盐田港A	88	2004	0.0501901	0.112558	0.0232516	G58	装卸搬运和运输代理业	广东省	深圳市
000088	G 盐田港	88	2005	0.0114537	0.105935	0.0135854	G58	装卸搬运和运输代理业	广东省	深圳市
000088	盐田港	88	2006	0.0286	0.0974384	0.0126751	G58	装卸搬运和运输代理业	广东省	深圳市
000088	盐田港	88	2007	0.0205719	0.184879	0.00867854	G58	装卸搬运和运输代理业	广东省	深圳市
000088	盐田港	88	2008	0.0554295	0.131158	-0.0213771	G58	装卸搬运和运输代理业	广东省	深圳市
000088	盐田港	88	2009	0.0718631	0.100814	-0.0315614	G58	装卸搬运和运输代理业	广东省	深圳市
000088	盐田港	88	2010	0.0217758	0.0729506	-0.0285769	G58	装卸搬运和运输代理业	广东省	深圳市
000088	盐田港	88	2011	0.0585612	0.0667322	-0.00690492	G58	装卸搬运和运输代理业	广东省	深圳市
000088	盐田港	88	2012	0.0205042	0.0826829	-0.00849572	G54	道路运输业	广东省	深圳市
000088	盐田港	88	2013	0.0413691	0.141202	-0.0109242	G54	道路运输业	广东省	深圳市
000088	盐田港	88	2014	0.281951	0.0913611	-0.00599067	G54	道路运输业	广东省	深圳市
000088	盐田港	88	2015	0.920836	0.172458	-0.00675527	G54	道路运输业	广东省	深圳市
000088	盐田港	88	2016	0.839378	0.121861	-0.00239586	G54	道路运输业	广东省	深圳市
000088	盐田港	88	2017	0.844497	0.0857996	0.00429281	G54	道路运输业	广东省	深圳市
000088	盐田港	88	2018	0.286367	0.0657877	0.0154602	G54	道路运输业	广东省	深圳市
000088	盐田港	88	2019	0.170054	0.108335	0.0309622	G54	道路运输业	广东省	深圳市
000088	盐田港	88	2020	0.706664	0.176419	0.0187402	G54	道路运输业	广东省	深圳市
000088	盐田港	88	2021	0.527311	0.0642172	0.0276354	G54	道路运输业	广东省	深圳市
000088	盐田港	88	2022	0.841158	0.0615234	0.0204251	G54	道路运输业	广东省	深圳市
000088	盐田港	88	2023	0.647201	0.0473452	0.0362026	G54	道路运输业	广东省	深圳市
000089	深圳机场	89	2001	0.432337	0.0621841	0.035579	G58	装卸搬运和运输代理业	广东省	深圳市
000089	深圳机场	89	2002	0.387479	0.0769169	0.0345416	G58	装卸搬运和运输代理业	广东省	深圳市
000089	深圳机场	89	2003	0.244732	0.0521551	0.0294082	G58	装卸搬运和运输代理业	广东省	深圳市
000089	深圳机场	89	2004	0.0561614	0.0865511	0.0314173	G58	装卸搬运和运输代理业	广东省	深圳市
000089	G 深机场	89	2005	0.0118149	0.0758938	0.0300728	G58	装卸搬运和运输代理业	广东省	深圳市
000089	深圳机场	89	2006	0.0292378	0.0979108	0.0554455	G58	装卸搬运和运输代理业	广东省	深圳市
000089	深圳机场	89	2007	0.0212627	0.164637	0.0494959	G58	装卸搬运和运输代理业	广东省	深圳市
000089	深圳机场	89	2008	0.0567052	0.108223	0.0503086	G58	装卸搬运和运输代理业	广东省	深圳市
000089	深圳机场	89	2009	0.0739983	0.0839202	0.0360279	G58	装卸搬运和运输代理业	广东省	深圳市
000089	深圳机场	89	2010	0.0228283	0.0801833	0.0487355	G58	装卸搬运和运输代理业	广东省	深圳市
000089	深圳机场	89	2011	0.0594468	0.0481872	0.0817543	G58	装卸搬运和运输代理业	广东省	深圳市
000089	深圳机场	89	2012	0.0211329	0.0544221	0.0810584	G56	航空运输业	广东省	深圳市
000089	深圳机场	89	2013	0.0423424	0.0816903	0.0646966	G56	航空运输业	广东省	深圳市
000089	深圳机场	89	2014	0.292632	0.0692532	0.0639962	G56	航空运输业	广东省	深圳市
000089	深圳机场	89	2015	0.917375	0.19808	0.047925	G56	航空运输业	广东省	深圳市
000089	深圳机场	89	2016	0.878696	0.0944367	0.0489876	G56	航空运输业	广东省	深圳市
000089	深圳机场	89	2017	0.866208	0.0350283	0.0347504	G56	航空运输业	广东省	深圳市
000089	深圳机场	89	2018	0.295145	0.052839	0.0646684	G56	航空运输业	广东省	深圳市
000089	深圳机场	89	2019	0.175024	0.0889923	0.0770248	G56	航空运输业	广东省	深圳市
000089	深圳机场	89	2020	0.770908	0.118609	-0.0324064	G56	航空运输业	广东省	深圳市
000089	深圳机场	89	2021	0.528519	0.0584543	-0.0293591	G56	航空运输业	广东省	深圳市
000089	深圳机场	89	2022	0.825352	0.0895742	-0.113538	G56	航空运输业	广东省	深圳市
000089	深圳机场	89	2023	0.651319	0.0371602	0.116797	G56	航空运输业	广东省	深圳市
000090	深天健	90	2002	0.371036	0.088754	0.0192034	E47	房屋建筑业	广东省	深圳市
000090	深天健	90	2003	0.232546	0.068063	0.00647143	E47	房屋建筑业	广东省	深圳市
000090	深天健	90	2004	0.0546599	0.0918218	0.0207931	E47	房屋建筑业	广东省	深圳市
000090	G 天健	90	2005	0.0116063	0.099441	0.0278617	E47	房屋建筑业	广东省	深圳市
000090	深天健	90	2006	0.0276477	0.125135	0.0360348	E47	房屋建筑业	广东省	深圳市
000090	深天健	90	2007	0.0223432	0.160599	0.116769	E47	房屋建筑业	广东省	深圳市
000090	深天健	90	2008	0.056671	0.183297	0.102233	E47	房屋建筑业	广东省	深圳市
000090	深天健	90	2009	0.0743966	0.297979	0.0694537	E47	房屋建筑业	广东省	深圳市
000090	深天健	90	2010	0.0229347	0.180609	0.071131	E47	房屋建筑业	广东省	深圳市
000090	深天健	90	2011	0.0590797	0.100122	0.0700137	E47	房屋建筑业	广东省	深圳市
000090	深天健	90	2012	0.0208257	0.107678	0.0414107	E48	土木工程建筑业	广东省	深圳市
000090	深天健	90	2013	0.0426454	0.0855529	0.0967467	E48	土木工程建筑业	广东省	深圳市
000090	天健集团	90	2014	0.24853	0.181123	0.175151	E48	土木工程建筑业	广东省	深圳市
000090	天健集团	90	2015	0.920937	0.176517	0.32372	E48	土木工程建筑业	广东省	深圳市
000090	天健集团	90	2016	0.841579	0.120426	0.16951	E48	土木工程建筑业	广东省	深圳市
000090	天健集团	90	2017	0.853101	0.0668974	0.145087	E48	土木工程建筑业	广东省	深圳市
000090	天健集团	90	2018	0.286268	0.0704612	0.389171	E48	土木工程建筑业	广东省	深圳市
000090	天健集团	90	2019	0.179024	0.097452	0.845627	E48	土木工程建筑业	广东省	深圳市
000090	天健集团	90	2020	0.73218	0.155594	1.03751	E48	土木工程建筑业	广东省	深圳市
000090	天健集团	90	2021	0.531339	0.0803681	1.30598	E48	土木工程建筑业	广东省	深圳市
000090	天健集团	90	2022	0.828427	0.0884821	1.17987	E48	土木工程建筑业	广东省	深圳市
000090	天健集团	90	2023	0.624158	0.115718	0.987459	E48	土木工程建筑业	广东省	深圳市
000096	广聚能源	96	2003	0.250574	0.0509926	0.0580585	F51	批发业	广东省	深圳市
000096	广聚能源	96	2004	0.0519557	0.112176	0.0750211	F51	批发业	广东省	深圳市
000096	广聚能源	96	2005	0.0121888	0.151448	0.0731148	F51	批发业	广东省	深圳市
000096	广聚能源	96	2006	0.0302146	0.0787616	0.0599145	F51	批发业	广东省	深圳市
000096	广聚能源	96	2007	0.0205846	0.230689	0.0151605	F51	批发业	广东省	深圳市
000096	广聚能源	96	2008	0.0548317	0.182083	-0.0259172	F51	批发业	广东省	深圳市
000096	广聚能源	96	2009	0.0685342	0.12539	-0.137105	F51	批发业	广东省	深圳市
000096	广聚能源	96	2010	0.0211666	0.12588	-0.0649654	F51	批发业	广东省	深圳市
000096	广聚能源	96	2011	0.0582681	0.0767671	-0.0340483	F51	批发业	广东省	深圳市
000096	广聚能源	96	2012	0.0205948	0.07298	0.00383398	F51	批发业	广东省	深圳市
000096	广聚能源	96	2013	0.040818	0.181575	-0.0512038	F51	批发业	广东省	深圳市
000096	广聚能源	96	2014	0.261442	0.1387	-0.0453706	F51	批发业	广东省	深圳市
000096	广聚能源	96	2015	0.917848	0.194044	0.00326682	F51	批发业	广东省	深圳市
000096	广聚能源	96	2016	0.878887	0.0942761	0.0036812	F51	批发业	广东省	深圳市
000096	广聚能源	96	2017	0.865709	0.0360967	0.0235292	F51	批发业	广东省	深圳市
000096	广聚能源	96	2018	0.273751	0.08586	0.0656358	F51	批发业	广东省	深圳市
000096	广聚能源	96	2019	0.176328	0.0833473	0.0717991	F51	批发业	广东省	深圳市
000096	广聚能源	96	2020	0.812921	0.0809367	-0.00143522	F51	批发业	广东省	深圳市
000096	广聚能源	96	2021	0.531366	0.0487371	-0.00344837	F51	批发业	广东省	深圳市
000096	广聚能源	96	2022	0.829016	0.0835204	0.0477161	F51	批发业	广东省	深圳市
000096	广聚能源	96	2023	0.638462	0.0711318	0.132395	F51	批发业	广东省	深圳市
000099	中信海直	99	2003	0.232844	0.0683306	0.00882187	G56	航空运输业	广东省	深圳市
000099	中信海直	99	2004	0.0552141	0.087999	0.0120351	G56	航空运输业	广东省	深圳市
000099	G 海直	99	2005	0.0114537	0.10635	0.0138818	G56	航空运输业	广东省	深圳市
000099	中信海直	99	2006	0.0272075	0.126029	0.0102655	G56	航空运输业	广东省	深圳市
000099	中信海直	99	2007	0.0204642	0.243093	0.00914362	G56	航空运输业	广东省	深圳市
000099	中信海直	99	2008	0.0559798	0.136987	0.0209162	G56	航空运输业	广东省	深圳市
000099	中信海直	99	2009	0.0737527	0.124285	0.0319366	G56	航空运输业	广东省	深圳市
000099	中信海直	99	2010	0.022449	0.175638	0.0352216	G56	航空运输业	广东省	深圳市
000099	中信海直	99	2011	0.0587173	0.102479	0.0307674	G56	航空运输业	广东省	深圳市
000099	中信海直	99	2012	0.0207572	0.0793771	0.0283896	G56	航空运输业	广东省	深圳市
000099	中信海直	99	2013	0.0417394	0.152637	0.0308066	G56	航空运输业	广东省	深圳市
000099	中信海直	99	2014	0.275312	0.109463	0.0352453	G56	航空运输业	广东省	深圳市
000099	中信海直	99	2015	0.92308	0.156739	0.0198	G56	航空运输业	广东省	深圳市
000099	中信海直	99	2016	0.768733	0.171192	-0.00152682	G56	航空运输业	广东省	深圳市
000099	中信海直	99	2017	0.854306	0.0626233	-0.00693461	G56	航空运输业	广东省	深圳市
000099	中信海直	99	2018	0.280869	0.0742489	0.013648	G56	航空运输业	广东省	深圳市
000099	中信海直	99	2019	0.173679	0.0934033	0.0395328	G56	航空运输业	广东省	深圳市
000099	中信海直	99	2020	0.822769	0.0721535	0.0288599	G56	航空运输业	广东省	深圳市
000099	中信海直	99	2021	0.522748	0.0807412	0.0254845	G56	航空运输业	广东省	深圳市
000099	中信海直	99	2022	0.832714	0.0767646	0.0230861	G56	航空运输业	广东省	深圳市
000099	中信海直	99	2023	0.639379	0.0679764	0.0411351	G56	航空运输业	广东省	深圳市
000100	TCL集团	100	2006	0.0568937	0.102157	1.8601	C39	计算机、通信和其他电子设备制造业	广东省	惠州市
000100	TCL集团	100	2008	0.036409	0.147681	-1.32618	C39	计算机、通信和其他电子设备制造业	广东省	惠州市
000100	TCL集团	100	2009	0.0648871	0.109938	-0.256802	C39	计算机、通信和其他电子设备制造业	广东省	惠州市
000100	TCL集团	100	2010	0.0397864	0.079115	1.2771	C39	计算机、通信和其他电子设备制造业	广东省	惠州市
000100	TCL集团	100	2011	0.07819	0.143348	2.23378	C39	计算机、通信和其他电子设备制造业	广东省	惠州市
000100	TCL集团	100	2012	0.0376675	0.0765698	2.51611	C39	计算机、通信和其他电子设备制造业	广东省	惠州市
000100	TCL集团	100	2013	0.0748547	0.088196	3.34905	C39	计算机、通信和其他电子设备制造业	广东省	惠州市
000100	TCL集团	100	2014	0.372415	0.081137	4.02771	C39	计算机、通信和其他电子设备制造业	广东省	惠州市
000100	TCL集团	100	2015	0.924534	0.133447	3.51311	C39	计算机、通信和其他电子设备制造业	广东省	惠州市
000100	TCL集团	100	2016	0.923969	0.0640552	2.11494	C39	计算机、通信和其他电子设备制造业	广东省	惠州市
000100	TCL集团	100	2017	0.850324	0.0820469	1.05487	C39	计算机、通信和其他电子设备制造业	广东省	惠州市
000100	TCL集团	100	2018	0.302756	0.050937	0.878059	C39	计算机、通信和其他电子设备制造业	广东省	惠州市
000100	TCL科技	100	2019	0.142366	0.119918	-3.15404	C39	计算机、通信和其他电子设备制造业	广东省	惠州市
000100	TCL科技	100	2020	0.733123	0.145442	-3.49001	C39	计算机、通信和其他电子设备制造业	广东省	惠州市
000100	TCL科技	100	2021	0.552403	0.0932366	5.01805	C39	计算机、通信和其他电子设备制造业	广东省	惠州市
000100	TCL科技	100	2022	0.844632	0.0867362	9.16197	C39	计算机、通信和其他电子设备制造业	广东省	惠州市
000100	TCL科技	100	2023	0.671186	0.0631238	9.76894	C39	计算机、通信和其他电子设备制造业	广东省	惠州市
000150	光电股份	150	2005	0.0115746	0.131431	0.0369581	K70	房地产业	广东省	惠州市
000150	光电股份	150	2006	0.0249698	0.172498	0.00800271	K70	房地产业	广东省	惠州市
000150	宜华地产	150	2008	0.0550866	0.205688	0.00879138	K70	房地产业	广东省	汕头市
000150	宜华地产	150	2009	0.0731695	0.132491	0.0138193	K70	房地产业	广东省	汕头市
000150	宜华地产	150	2010	0.0219043	0.0874389	-0.0171418	K70	房地产业	广东省	汕头市
000150	宜华地产	150	2011	0.0582606	0.069799	-0.0388174	K70	房地产业	广东省	汕头市
000150	宜华地产	150	2012	0.0203493	0.116557	-0.0277565	K70	房地产业	广东省	汕头市
000150	宜华地产	150	2013	0.0421956	0.121549	0.0650343	K70	房地产业	广东省	汕头市
000150	宜华健康	150	2014	0.227677	0.222574	0.0052558	K70	房地产业	广东省	汕头市
000150	宜华健康	150	2015	0.910932	0.244987	0.0946322	K70	房地产业	广东省	汕头市
000150	宜华健康	150	2016	0.792659	0.154519	0.0567197	Q83	卫生	广东省	汕头市
000150	宜华健康	150	2017	0.860069	0.0509922	0.19585	Q83	卫生	广东省	汕头市
000150	宜华健康	150	2018	0.266563	0.0975758	0.117277	Q83	卫生	广东省	汕头市
000150	宜华健康	150	2019	0.171265	0.103864	0.049578	Q83	卫生	广东省	汕头市
000150	宜华健康	150	2020	0.748092	0.139055	-0.0554529	Q83	卫生	广东省	汕头市
000150	宜华健康	150	2021	0.483331	0.221235	-0.0869593	Q83	卫生	广东省	汕头市
000151	中成股份	151	2003	0.239305	0.0590444	0.0186581	O81	其他服务业	北京市	北京市
000151	中成股份	151	2004	0.0548999	0.0894436	0.0121192	O81	其他服务业	北京市	北京市
000151	G 中成	151	2005	0.0127009	0.128282	0.0900321	O81	其他服务业	北京市	北京市
000151	中成股份	151	2006	0.0289117	0.103315	0.0509174	O81	其他服务业	北京市	北京市
000151	中成股份	151	2007	0.0201728	0.253084	-0.0078911	O81	其他服务业	北京市	北京市
000151	中成股份	151	2008	0.0536116	0.226481	-0.0782314	O81	其他服务业	北京市	北京市
000151	中成股份	151	2009	0.0714362	0.170297	-0.0387386	O81	其他服务业	北京市	北京市
000151	中成股份	151	2010	0.0222321	0.191094	0.0217701	F52	零售业	北京市	北京市
000151	中成股份	151	2011	0.0587454	0.112762	0.0397281	F52	零售业	北京市	北京市
000151	中成股份	151	2012	0.021209	0.0982103	0.0968253	F51	批发业	北京市	北京市
000151	中成股份	151	2013	0.042291	0.0880565	0.0619249	F51	批发业	北京市	北京市
000151	中成股份	151	2014	0.213837	0.263332	0.149957	F51	批发业	北京市	北京市
000151	中成股份	151	2015	0.922035	0.163282	-0.046183	F51	批发业	北京市	北京市
000151	中成股份	151	2016	0.848399	0.115576	0.0212244	F51	批发业	北京市	北京市
000151	中成股份	151	2017	0.838674	0.0991598	-0.0309361	F51	批发业	北京市	北京市
000151	中成股份	151	2018	0.181048	0.228175	0.00582931	F51	批发业	北京市	北京市
000151	中成股份	151	2019	0.172239	0.0962308	-0.058376	F51	批发业	北京市	北京市
000151	中成股份	151	2020	0.820711	0.0736449	-0.144775	F51	批发业	北京市	北京市
000151	中成股份	151	2021	0.508502	0.134026	0.0888885	F51	批发业	北京市	北京市
000151	中成股份	151	2022	0.619117	0.463042	0.303842	F51	批发业	北京市	北京市
000151	中成股份	151	2023	0.633282	0.0855481	0.228648	F51	批发业	北京市	北京市
000153	丰原药业	153	2003	0.237673	0.0578476	0.00649777	C27	医药制造业	安徽省	芜湖市
000153	丰原药业	153	2004	0.0515768	0.104592	0.0121332	C27	医药制造业	安徽省	芜湖市
000153	丰原药业	153	2005	0.0114537	0.135843	0.0283277	C27	医药制造业	安徽省	芜湖市
000153	丰原药业	153	2006	0.0300474	0.0739192	0.0342171	C27	医药制造业	安徽省	芜湖市
000153	丰原药业	153	2007	0.0210752	0.201607	0.0423237	C27	医药制造业	安徽省	芜湖市
000153	丰原药业	153	2008	0.0560431	0.161827	0.0432593	C27	医药制造业	安徽省	芜湖市
000153	丰原药业	153	2009	0.074128	0.117366	0.0434401	C27	医药制造业	安徽省	芜湖市
000153	丰原药业	153	2010	0.022569	0.128667	0.0370403	C27	医药制造业	安徽省	芜湖市
000153	丰原药业	153	2011	0.0590746	0.090978	0.064268	C27	医药制造业	安徽省	芜湖市
000153	丰原药业	153	2012	0.0210327	0.0917097	0.0702069	C27	医药制造业	安徽省	芜湖市
000153	丰原药业	153	2013	0.0421109	0.0928421	0.0455716	C27	医药制造业	安徽省	芜湖市
000153	丰原药业	153	2014	0.256841	0.153046	0.0182458	C27	医药制造业	安徽省	芜湖市
000153	丰原药业	153	2015	0.924534	0.127616	-0.010347	C27	医药制造业	安徽省	芜湖市
000153	丰原药业	153	2016	0.924534	0.0599167	0.0503785	C27	医药制造业	安徽省	芜湖市
000153	丰原药业	153	2017	0.840407	0.0962098	0.087916	C27	医药制造业	安徽省	芜湖市
000153	丰原药业	153	2018	0.275801	0.0836683	0.14591	C27	医药制造业	安徽省	芜湖市
000153	丰原药业	153	2019	0.177166	0.0814283	0.120438	C27	医药制造业	安徽省	芜湖市
000153	丰原药业	153	2020	0.658301	0.219973	0.0743077	C27	医药制造业	安徽省	芜湖市
000153	丰原药业	153	2021	0.507987	0.134932	0.0488273	C27	医药制造业	安徽省	芜湖市
000153	丰原药业	153	2022	0.7727	0.18521	0.0765956	C27	医药制造业	安徽省	芜湖市
000153	丰原药业	153	2023	0.629574	0.0942285	0.0954254	C27	医药制造业	安徽省	芜湖市
000155	川化股份	155	2003	0.241952	0.0490263	0.00571265	C26	化学原料及化学制品制造业	四川省	成都市
000155	川化股份	155	2004	0.0491972	0.113933	0.00197218	C26	化学原料及化学制品制造业	四川省	成都市
000155	川化股份	155	2005	0.0124483	0.0815119	0.0623749	C26	化学原料及化学制品制造业	四川省	成都市
000155	川化股份	155	2006	0.029226	0.0935628	0.0413237	C26	化学原料及化学制品制造业	四川省	成都市
000155	川化股份	155	2007	0.0220331	0.234321	0.106463	C26	化学原料及化学制品制造业	四川省	成都市
000155	川化股份	155	2008	0.0560706	0.23963	0.101424	C26	化学原料及化学制品制造业	四川省	成都市
000155	川化股份	155	2009	0.0751018	0.105275	0.0738451	C26	化学原料及化学制品制造业	四川省	成都市
000155	川化股份	155	2010	0.0220818	0.0972437	-0.00285289	C26	化学原料及化学制品制造业	四川省	成都市
000155	川化股份	155	2011	0.0578522	0.103472	-0.0655129	C26	化学原料及化学制品制造业	四川省	成都市
000155	川化股份	155	2013	0.0412269	0.156444	-0.0194854	C26	化学原料及化学制品制造业	四川省	成都市
000155	川化股份	155	2017	0.189864		0.566698	C26	化学原料及化学制品制造业	四川省	成都市
000155	川能动力	155	2018	0.271323	0.0935945	0.395241	C26	化学原料及化学制品制造业	四川省	成都市
000155	川能动力	155	2019	0.174309	0.0902471	0.0238708	C26	化学原料及化学制品制造业	四川省	成都市
000155	川能动力	155	2020	0.725132	0.158865	-0.451262	D44	电力、热力生产和供应业	四川省	成都市
000155	川能动力	155	2021	0.447231	0.354808	0.0135962	D44	电力、热力生产和供应业	四川省	成都市
000155	川能动力	155	2022	0.783349	0.166339	0.175032	D44	电力、热力生产和供应业	四川省	成都市
000155	川能动力	155	2023	0.633381	0.0845014	0.131646	D44	电力、热力生产和供应业	四川省	成都市
000156	安塑股份	156	2003	0.240643	0.0598161	0.0280566	C29	橡胶和塑料制品业	湖南省	洪江市
000156	安塑股份	156	2004	0.0482037	0.121501	0.0225081	C29	橡胶和塑料制品业	湖南省	洪江市
000156	嘉瑞新材	156	2005	0.0114537	0.162569	0.0114366	C29	橡胶和塑料制品业	湖南省	洪江市
000156	嘉瑞新材	156	2006	0.0229677	0.20969	-0.00748144	C29	橡胶和塑料制品业	湖南省	洪江市
000156	华数传媒	156	2012	0.0160675	7.15635	0.0756708	R86	广播、电视、电影和影视录音制作业	浙江省	杭州市
000156	华数传媒	156	2013	0.0419077	0.270926	0.0927736	R86	广播、电视、电影和影视录音制作业	浙江省	杭州市
000156	华数传媒	156	2014	0.281719	0.0992969	0.137394	R86	广播、电视、电影和影视录音制作业	浙江省	杭州市
000156	华数传媒	156	2015	0.920145	0.179471	0.134997	R86	广播、电视、电影和影视录音制作业	浙江省	杭州市
000156	华数传媒	156	2016	0.779398	0.163822	0.128	R86	广播、电视、电影和影视录音制作业	浙江省	杭州市
000156	华数传媒	156	2017	0.858928	0.0525758	0.0797692	R86	广播、电视、电影和影视录音制作业	浙江省	杭州市
000156	华数传媒	156	2018	0.266707	0.0966345	0.0577422	R86	广播、电视、电影和影视录音制作业	浙江省	杭州市
000156	华数传媒	156	2019	0.166839	0.122881	0.0629481	R86	广播、电视、电影和影视录音制作业	浙江省	杭州市
000156	华数传媒	156	2020	0.810475	0.0840345	0.436834	R86	广播、电视、电影和影视录音制作业	浙江省	杭州市
000156	华数传媒	156	2021	0.530919	0.0625982	0.504767	R86	广播、电视、电影和影视录音制作业	浙江省	杭州市
000156	华数传媒	156	2022	0.838148	0.0688367	0.567539	R86	广播、电视、电影和影视录音制作业	浙江省	杭州市
000156	华数传媒	156	2023	0.641345	0.0641936	0.212922	R86	广播、电视、电影和影视录音制作业	浙江省	杭州市
000157	中联重科	157	2003	0.250439	0.0639979	0.0928483	C35	专用设备制造业	湖南省	长沙市
000157	中联重科	157	2004	0.0583897	0.116042	0.299213	C35	专用设备制造业	湖南省	长沙市
000157	中联重科	157	2005	0.0164077	0.107767	0.261344	C35	专用设备制造业	湖南省	长沙市
000157	中联重科	157	2006	0.0321812	0.130174	0.345201	C35	专用设备制造业	湖南省	长沙市
000157	中联重科	157	2007	0.0293132	0.203794	0.559311	C35	专用设备制造业	湖南省	长沙市
000157	中联重科	157	2008	0.0692785	0.255776	1.02699	C35	专用设备制造业	湖南省	长沙市
000157	中联重科	157	2009	0.122535	0.130069	1.61368	C35	专用设备制造业	湖南省	长沙市
000157	中联重科	157	2010	0.0539716	0.196541	2.32191	C35	专用设备制造业	湖南省	长沙市
000157	中联重科	157	2011	0.0878616	0.074143	3.27738	C35	专用设备制造业	湖南省	长沙市
000157	中联重科	157	2012	0.0391054	0.10758	2.7309	C35	专用设备制造业	湖南省	长沙市
000157	中联重科	157	2013	0.0479849	0.0833786	0.63491	C35	专用设备制造业	湖南省	长沙市
000157	中联重科	157	2014	0.228104	0.115959	-2.04714	C35	专用设备制造业	湖南省	长沙市
000157	中联重科	157	2015	0.922102	0.123923	-2.73178	C35	专用设备制造业	湖南省	长沙市
000157	中联重科	157	2016	0.894632	0.0821745	-1.85193	C35	专用设备制造业	湖南省	长沙市
000157	中联重科	157	2017	0.862617	0.0407021	-0.25783	C35	专用设备制造业	湖南省	长沙市
000157	中联重科	157	2018	0.308924	0.0404058	0.79432	C35	专用设备制造业	湖南省	长沙市
000157	中联重科	157	2019	0.198475	0.0645251	2.32849	C35	专用设备制造业	湖南省	长沙市
000157	中联重科	157	2020	0.784903	0.114703	4.1836	C35	专用设备制造业	湖南省	长沙市
000157	中联重科	157	2021	0.535677	0.125715	3.84341	C35	专用设备制造业	湖南省	长沙市
000157	中联重科	157	2022	0.841445	0.0603589	-0.16759	C35	专用设备制造业	湖南省	长沙市
000157	中联重科	157	2023	0.633478	0.0685542	-1.80341	C35	专用设备制造业	湖南省	长沙市
000158	常山股份	158	2003	0.234435	0.0703196	0.0229273	C17	纺织业	河北省	石家庄市
000158	常山股份	158	2004	0.0487555	0.124261	0.0581338	C17	纺织业	河北省	石家庄市
000158	G 常山	158	2005	0.0114537	0.167968	0.0428882	C17	纺织业	河北省	石家庄市
000158	常山股份	158	2006	0.030195	0.0786947	0.0584444	C17	纺织业	河北省	石家庄市
000158	常山股份	158	2007	0.021343	0.225871	0.0621327	C17	纺织业	河北省	石家庄市
000158	常山股份	158	2008	0.0563566	0.165772	0.0678015	C17	纺织业	河北省	石家庄市
000158	常山股份	158	2009	0.0741178	0.137179	0.045006	C17	纺织业	河北省	石家庄市
000158	常山股份	158	2010	0.0231496	0.116324	0.0772981	C17	纺织业	河北省	石家庄市
000158	常山股份	158	2011	0.059903	0.114097	0.170074	C17	纺织业	河北省	石家庄市
000158	常山股份	158	2012	0.0218644	0.0925546	0.192661	C17	纺织业	河北省	石家庄市
000158	常山股份	158	2013	0.0436912	0.120633	0.215659	C17	纺织业	河北省	石家庄市
000158	常山股份	158	2014	0.241931	0.197583	0.186364	C17	纺织业	河北省	石家庄市
000158	常山股份	158	2015	0.904997	0.291826	0.387942	C17	纺织业	河北省	石家庄市
000158	常山股份	158	2016	0.802972	0.14759	0.511693	C17	纺织业	河北省	石家庄市
000158	常山北明	158	2017	0.836239	0.109618	0.468595	C17	纺织业	河北省	石家庄市
000158	常山北明	158	2018	0.244835	0.130595	0.0754173	C17	纺织业	河北省	石家庄市
000158	常山北明	158	2019	0.161237	0.139306	-0.15277	I65	软件和信息技术服务业	河北省	石家庄市
000158	常山北明	158	2020	0.625062	0.249393	-0.137067	I65	软件和信息技术服务业	河北省	石家庄市
000158	常山北明	158	2021	0.467235	0.284757	0.12255	I65	软件和信息技术服务业	河北省	石家庄市
000158	常山北明	158	2022	0.810558	0.116727	0.0216852	I65	软件和信息技术服务业	河北省	石家庄市
000158	常山北明	158	2023	0.591872	0.191994	-0.0876594	I65	软件和信息技术服务业	河北省	石家庄市
000159	国际实业	159	2003	0.22011	0.0986145	0.022173	C25	石油加工、炼焦及核燃料加工业	新疆维吾尔自治区	乌鲁木齐市
000159	国际实业	159	2004	0.0545982	0.091166	0.0144654	C25	石油加工、炼焦及核燃料加工业	新疆维吾尔自治区	乌鲁木齐市
000159	国际实业	159	2005	0.0114537	0.222627	-0.0037447	C25	石油加工、炼焦及核燃料加工业	新疆维吾尔自治区	乌鲁木齐市
000159	国际实业	159	2006	0.0263736	0.138713	-0.00480995	C25	石油加工、炼焦及核燃料加工业	新疆维吾尔自治区	乌鲁木齐市
000159	国际实业	159	2007	0.0210522	0.194084	0.0399439	C25	石油加工、炼焦及核燃料加工业	新疆维吾尔自治区	乌鲁木齐市
000159	国际实业	159	2008	0.0559443	0.152207	0.0294644	C25	石油加工、炼焦及核燃料加工业	新疆维吾尔自治区	乌鲁木齐市
000159	国际实业	159	2009	0.0725887	0.178356	-0.000611438	C25	石油加工、炼焦及核燃料加工业	新疆维吾尔自治区	乌鲁木齐市
000159	国际实业	159	2010	0.021806	0.180045	-0.0107169	C25	石油加工、炼焦及核燃料加工业	新疆维吾尔自治区	乌鲁木齐市
000159	国际实业	159	2011	0.0590111	0.0724987	0.0467211	C25	石油加工、炼焦及核燃料加工业	新疆维吾尔自治区	乌鲁木齐市
000159	国际实业	159	2012	0.0211397	0.114111	0.0882799	F51	批发业	新疆维吾尔自治区	乌鲁木齐市
000159	国际实业	159	2013	0.0417385	0.156415	0.0321544	F51	批发业	新疆维吾尔自治区	乌鲁木齐市
000159	国际实业	159	2014	0.28473	0.0846659	-0.00611918	F51	批发业	新疆维吾尔自治区	乌鲁木齐市
000159	国际实业	159	2015	0.924534	0.130572	-0.0720571	F51	批发业	新疆维吾尔自治区	乌鲁木齐市
000159	国际实业	159	2016	0.774283	0.167285	-0.0545276	F51	批发业	新疆维吾尔自治区	乌鲁木齐市
000159	国际实业	159	2017	0.837733	0.100888	-0.0821398	F51	批发业	新疆维吾尔自治区	乌鲁木齐市
000159	国际实业	159	2018	0.267278	0.0948988	-0.0129133	F51	批发业	新疆维吾尔自治区	乌鲁木齐市
000159	国际实业	159	2019	0.11509	0.337697	-0.00928081	F51	批发业	新疆维吾尔自治区	乌鲁木齐市
000159	国际实业	159	2020	0.774701	0.115309	0.019647	F51	批发业	新疆维吾尔自治区	乌鲁木齐市
000159	国际实业	159	2021	0.504704	0.14705	0.0568554	F51	批发业	新疆维吾尔自治区	乌鲁木齐市
000159	国际实业	159	2022	0.78973	0.154631	0.118102	F51	批发业	新疆维吾尔自治区	乌鲁木齐市
000159	国际实业	159	2023	0.639741	0.0699049	0.396278	F51	批发业	新疆维吾尔自治区	乌鲁木齐市
000301	丝绸股份	301	2003	0.238777	0.0852403	0.0873393	C17	纺织业	江苏省	苏州市
000301	丝绸股份	301	2004	0.0593988	0.0762682	0.0616245	C17	纺织业	江苏省	苏州市
000301	丝绸股份	301	2005	0.0127285	0.145166	0.0969633	C17	纺织业	江苏省	苏州市
000301	丝绸股份	301	2006	0.0295003	0.0998286	0.0783408	C17	纺织业	江苏省	苏州市
000301	丝绸股份	301	2007	0.0214734	0.246646	0.0728851	C17	纺织业	江苏省	苏州市
000301	东方市场	301	2008	0.0525382	0.170805	-0.192761	C17	纺织业	江苏省	苏州市
000301	东方市场	301	2009	0.0658997	0.109785	-0.223996	C17	纺织业	江苏省	苏州市
000301	东方市场	301	2010	0.019223	0.107091	-0.208514	S90	综合	江苏省	苏州市
000301	东方市场	301	2011	0.05876	0.0855598	0.0259943	S90	综合	江苏省	苏州市
000301	东方市场	301	2012	0.0206566	0.0757667	0.0132103	D44	电力、热力生产和供应业	江苏省	苏州市
000301	东方市场	301	2013	0.0418227	0.0785438	0.0110395	D44	电力、热力生产和供应业	江苏省	苏州市
000301	东方市场	301	2014	0.277761	0.100278	-0.0287141	D44	电力、热力生产和供应业	江苏省	苏州市
000301	东方市场	301	2015	0.924414	0.146619	-0.0181443	D44	电力、热力生产和供应业	江苏省	苏州市
000301	东方市场	301	2016	0.844272	0.118431	-0.0233891	D44	电力、热力生产和供应业	江苏省	苏州市
000301	东方市场	301	2017	0.8365	0.104874	0.0326543	D44	电力、热力生产和供应业	江苏省	苏州市
000301	东方盛虹	301	2018	0.285354	0.088634	1.77463	C28	化学纤维制造业	江苏省	苏州市
000301	东方盛虹	301	2019	0.196519	0.0753956	2.40947	C28	化学纤维制造业	江苏省	苏州市
000301	东方盛虹	301	2020	0.703166	0.183974	2.1665	C28	化学纤维制造业	江苏省	苏州市
000301	东方盛虹	301	2021	0.515192	0.187729	3.3282	C28	化学纤维制造业	江苏省	苏州市
000301	东方盛虹	301	2022	0.785306	0.175612	3.89345	C28	化学纤维制造业	江苏省	苏州市
000301	东方盛虹	301	2023	0.668613	0.0860928	11.7663	C28	化学纤维制造业	江苏省	苏州市
000333	美的集团	333	2016	0.8654	0.105963	3.8069	C38	电气机械及器材制造业	广东省	佛山市
000333	美的集团	333	2017	0.892339	0.0670646	9.90441	C38	电气机械及器材制造业	广东省	佛山市
000333	美的集团	333	2018	0.383409	0.0625334	12.1224	C38	电气机械及器材制造业	广东省	佛山市
000333	美的集团	333	2019	0.273246	0.0656899	11.9172	C38	电气机械及器材制造业	广东省	佛山市
000333	美的集团	333	2020	0.816607	0.0865706	4.35089	C38	电气机械及器材制造业	广东省	佛山市
000333	美的集团	333	2021	0.581034	0.0648097	8.15684	C38	电气机械及器材制造业	广东省	佛山市
000333	美的集团	333	2022	0.825447	0.11242	6.57015	C38	电气机械及器材制造业	广东省	佛山市
000333	美的集团	333	2023	0.661949	0.0794336	8.7816	C38	电气机械及器材制造业	广东省	佛山市
000338	潍柴动力	338	2010	0.0689153	0.178472	3.40186	C36	汽车制造业	山东省	潍坊市
000338	潍柴动力	338	2011	0.0826001	0.0755139	2.68915	C36	汽车制造业	山东省	潍坊市
000338	潍柴动力	338	2012	0.0291266	0.120079	1.26402	C36	汽车制造业	山东省	潍坊市
000338	潍柴动力	338	2013	0.0367055	0.101464	-0.496785	C36	汽车制造业	山东省	潍坊市
000338	潍柴动力	338	2014	0.324535	0.0900988	1.96179	C36	汽车制造业	山东省	潍坊市
000338	潍柴动力	338	2015	0.924534	0.117047	2.55545	C36	汽车制造业	山东省	潍坊市
000338	潍柴动力	338	2016	0.874733	0.099255	3.48718	C36	汽车制造业	山东省	潍坊市
000338	潍柴动力	338	2017	0.882082	0.065504	7.19322	C36	汽车制造业	山东省	潍坊市
000338	潍柴动力	338	2018	0.362831	0.0511073	8.55359	C36	汽车制造业	山东省	潍坊市
000338	潍柴动力	338	2019	0.236156	0.0965489	8.11774	C36	汽车制造业	山东省	潍坊市
000338	潍柴动力	338	2020	0.796014	0.105563	4.59217	C36	汽车制造业	山东省	潍坊市
000338	潍柴动力	338	2021	0.534649	0.143558	4.42919	C36	汽车制造业	山东省	潍坊市
000338	潍柴动力	338	2022	0.818028	0.103453	0.0796643	C36	汽车制造业	山东省	潍坊市
000338	潍柴动力	338	2023	0.639952	0.0794876	1.64674	C36	汽车制造业	山东省	潍坊市
000400	许继电气	400	2000	0.634315	0.0979761	0.0625332	C38	电气机械及器材制造业	河南省	许昌市
000400	许继电气	400	2001	0.446329	0.0736321	0.0769812	C38	电气机械及器材制造业	河南省	许昌市
000400	许继电气	400	2002	0.385938	0.0836276	0.0548035	C38	电气机械及器材制造业	河南省	许昌市
000400	许继电气	400	2003	0.238079	0.0747003	0.0547416	C38	电气机械及器材制造业	河南省	许昌市
000400	许继电气	400	2004	0.062636	0.0595031	0.0480456	C38	电气机械及器材制造业	河南省	许昌市
000400	G 许继	400	2005	0.0117738	0.153551	0.053873	C38	电气机械及器材制造业	河南省	许昌市
000400	许继电气	400	2006	0.0293772	0.0923722	0.0474657	C38	电气机械及器材制造业	河南省	许昌市
000400	许继电气	400	2007	0.0216968	0.152736	0.0752461	C38	电气机械及器材制造业	河南省	许昌市
000400	许继电气	400	2008	0.0542239	0.383202	0.0774591	C38	电气机械及器材制造业	河南省	许昌市
000400	许继电气	400	2009	0.0760945	0.0822592	0.103814	C38	电气机械及器材制造业	河南省	许昌市
000400	许继电气	400	2010	0.0240167	0.116191	0.14009	C38	电气机械及器材制造业	河南省	许昌市
000400	许继电气	400	2011	0.0601126	0.0832269	0.176093	C38	电气机械及器材制造业	河南省	许昌市
000400	许继电气	400	2012	0.0229022	0.206393	0.35722	C38	电气机械及器材制造业	河南省	许昌市
000400	许继电气	400	2013	0.0447687	0.135064	0.32991	C38	电气机械及器材制造业	河南省	许昌市
000400	许继电气	400	2014	0.284535	0.106011	0.399689	C38	电气机械及器材制造业	河南省	许昌市
000400	许继电气	400	2015	0.924534	0.131621	0.0734494	C38	电气机械及器材制造业	河南省	许昌市
000400	许继电气	400	2016	0.817188	0.137503	0.245238	C38	电气机械及器材制造业	河南省	许昌市
000400	许继电气	400	2017	0.857965	0.0559527	0.197153	C38	电气机械及器材制造业	河南省	许昌市
000400	许继电气	400	2018	0.265088	0.0994868	0.0870258	C38	电气机械及器材制造业	河南省	许昌市
000400	许继电气	400	2019	0.178246	0.0747431	0.0549073	C38	电气机械及器材制造业	河南省	许昌市
000400	许继电气	400	2020	0.777866	0.112603	0.0860481	C38	电气机械及器材制造业	河南省	许昌市
000400	许继电气	400	2021	0.500079	0.171572	0.377414	C38	电气机械及器材制造业	河南省	许昌市
000400	许继电气	400	2022	0.794399	0.147442	0.476137	C38	电气机械及器材制造业	河南省	许昌市
000400	许继电气	400	2023	0.62923	0.0991185	0.586969	C38	电气机械及器材制造业	河南省	许昌市
000401	冀东水泥	401	2000	0.632682	0.074146	0.0149676	C30	非金属矿物制品业	河北省	唐山市
000401	冀东水泥	401	2001	0.44338	0.0577359	0.0576298	C30	非金属矿物制品业	河北省	唐山市
000401	冀东水泥	401	2002	0.369798	0.0994752	0.0561324	C30	非金属矿物制品业	河北省	唐山市
000401	冀东水泥	401	2003	0.251351	0.0563559	0.0769427	C30	非金属矿物制品业	河北省	唐山市
000401	冀东水泥	401	2004	0.0524877	0.110952	0.0831357	C30	非金属矿物制品业	河北省	唐山市
000401	冀东水泥	401	2005	0.0133251	0.127298	0.119704	C30	非金属矿物制品业	河北省	唐山市
000401	冀东水泥	401	2006	0.0296359	0.11931	0.146946	C30	非金属矿物制品业	河北省	唐山市
000401	冀东水泥	401	2007	0.0236472	0.193652	0.202657	C30	非金属矿物制品业	河北省	唐山市
000401	冀东水泥	401	2008	0.0571885	0.304912	0.225979	C30	非金属矿物制品业	河北省	唐山市
000401	冀东水泥	401	2009	0.0851895	0.142595	0.404398	C30	非金属矿物制品业	河北省	唐山市
000401	冀东水泥	401	2010	0.0320041	0.127362	0.720368	C30	非金属矿物制品业	河北省	唐山市
000401	冀东水泥	401	2011	0.0683361	0.117299	1.11594	C30	非金属矿物制品业	河北省	唐山市
000401	冀东水泥	401	2012	0.0257395	0.138124	0.767561	C30	非金属矿物制品业	河北省	唐山市
000401	冀东水泥	401	2013	0.0461455	0.123968	0.464664	C30	非金属矿物制品业	河北省	唐山市
000401	冀东水泥	401	2014	0.268195	0.124452	-0.00634301	C30	非金属矿物制品业	河北省	唐山市
000401	冀东水泥	401	2015	0.918041	0.187539	-0.350509	C30	非金属矿物制品业	河北省	唐山市
000401	冀东水泥	401	2016	0.865413	0.103481	-0.337558	C30	非金属矿物制品业	河北省	唐山市
000401	冀东水泥	401	2017	0.80636	0.175093	-0.0375021	C30	非金属矿物制品业	河北省	唐山市
000401	冀东水泥	401	2018	0.263115	0.125362	1.97403	C30	非金属矿物制品业	河北省	唐山市
000401	冀东水泥	401	2019	0.190184	0.0956658	2.21719	C30	非金属矿物制品业	河北省	唐山市
000401	冀东水泥	401	2020	0.772061	0.12179	2.01899	C30	非金属矿物制品业	河北省	唐山市
000401	冀东水泥	401	2021	0.529999	0.0670046	0.548899	C30	非金属矿物制品业	河北省	唐山市
000401	冀东水泥	401	2022	0.834495	0.0734861	0.00366122	C30	非金属矿物制品业	河北省	唐山市
000401	冀东水泥	401	2023	0.64106	0.0573441	-0.724448	C30	非金属矿物制品业	河北省	唐山市
000402	金融街	402	2000	0.600362	0.120362	0.00918435	K70	房地产业	重庆市	重庆市
000402	金融街	402	2001	0.444282	0.0705675	0.0698291	K70	房地产业	北京市	北京市
000402	金融街	402	2002	0.415985	0.0600265	0.0752	K70	房地产业	北京市	北京市
000402	金融街	402	2003	0.250862	0.0737323	0.121741	K70	房地产业	北京市	北京市
000402	金融街	402	2004	0.0601957	0.0765786	0.0882558	K70	房地产业	北京市	北京市
000402	G 金融街	402	2005	0.0132524	0.101231	0.107558	K70	房地产业	北京市	北京市
000402	金融街	402	2006	0.0282408	0.167415	0.204293	K70	房地产业	北京市	北京市
000402	金融街	402	2007	0.0242815	0.233991	0.247452	K70	房地产业	北京市	北京市
000402	金融街	402	2008	0.061024	0.122588	0.359531	K70	房地产业	北京市	北京市
000402	金融街	402	2009	0.0811725	0.151621	0.275059	K70	房地产业	北京市	北京市
000402	金融街	402	2010	0.027495	0.0992076	0.389593	K70	房地产业	北京市	北京市
000402	金融街	402	2011	0.062265	0.0605345	0.404221	K70	房地产业	北京市	北京市
000402	金融街	402	2012	0.0280421	0.0796045	1.10024	K70	房地产业	北京市	北京市
000402	金融街	402	2013	0.0534122	0.0688548	1.17723	K70	房地产业	北京市	北京市
000402	金融街	402	2014	0.257913	0.213314	1.23986	K70	房地产业	北京市	北京市
000402	金融街	402	2015	0.921778	0.163383	-0.166912	K70	房地产业	北京市	北京市
000402	金融街	402	2016	0.840374	0.121165	-0.00300283	K70	房地产业	北京市	北京市
000402	金融街	402	2017	0.868822	0.0318507	0.348346	K70	房地产业	北京市	北京市
000402	金融街	402	2018	0.29545	0.0595085	0.65486	K70	房地产业	北京市	北京市
000402	金融街	402	2019	0.183089	0.0734109	0.633147	K70	房地产业	北京市	北京市
000402	金融街	402	2020	0.838578	0.0563747	-0.739797	K70	房地产业	北京市	北京市
000402	金融街	402	2021	0.514015	0.116772	0.204196	K70	房地产业	北京市	北京市
000402	金融街	402	2022	0.805604	0.123633	-0.567824	K70	房地产业	北京市	北京市
000402	金融街	402	2023	0.637896	0.0670468	-0.555074	K70	房地产业	北京市	北京市
000403	三九生化	403	2000	0.592076	0.125583	-0.00427323	C26	化学原料及化学制品制造业	江西省	宜春市
000403	三九生化	403	2001	0.426906	0.0622561	0.0230679	C26	化学原料及化学制品制造业	江西省	宜春市
000403	三九生化	403	2002	0.342705	0.11406	0.0118005	C26	化学原料及化学制品制造业	江西省	宜春市
000403	三九生化	403	2003	0.244933	0.0606509	0.0537098	C26	化学原料及化学制品制造业	江西省	宜春市
000403	三九生化	403	2004	0.0524123	0.102653	0.0247561	C26	化学原料及化学制品制造业	江西省	宜春市
000403	三九生化	403	2005	0.0115466	0.10699	0.0274995	C26	化学原料及化学制品制造业	江西省	宜春市
000403	振兴生化	403	2018	0.280225	0.0755128	0.0359574	C27	医药制造业	山西省	太原市
000403	双林生物	403	2019	0.177442	0.0774774	0.0354443	C27	医药制造业	山西省	太原市
000403	派林生物	403	2020	0.704998	0.177951	0.036456	C27	医药制造业	山西省	太原市
000403	派林生物	403	2021	0.522129	0.0850554	0.111189	C27	医药制造业	山西省	太原市
000403	派林生物	403	2022	0.795048	0.145144	0.148953	C27	医药制造业	山西省	太原市
000403	派林生物	403	2023	0.627046	0.101146	0.127879	C27	医药制造业	山西省	太原市
000404	华意压缩	404	2000	0.601549	0.107726	-0.0103669	C34	通用设备制造业	江西省	景德镇市
000404	华意压缩	404	2001	0.408659	0.0939988	0.00586067	C34	通用设备制造业	江西省	景德镇市
000404	华意压缩	404	2002	0.370545	0.0908816	0.0256159	C34	通用设备制造业	江西省	景德镇市
000404	华意压缩	404	2003	0.234382	0.0792442	0.0470129	C34	通用设备制造业	江西省	景德镇市
000404	华意压缩	404	2004	0.0391766	0.171	0.0789432	C34	通用设备制造业	江西省	景德镇市
000404	华意压缩	404	2005	0.0126714	0.113755	0.0837958	C34	通用设备制造业	江西省	景德镇市
000404	华意压缩	404	2006	0.027792	0.145302	0.107315	C34	通用设备制造业	江西省	景德镇市
000404	华意压缩	404	2007	0.0229673	0.262239	0.168523	C34	通用设备制造业	江西省	景德镇市
000404	华意压缩	404	2008	0.0580803	0.15749	0.181086	C34	通用设备制造业	江西省	景德镇市
000404	华意压缩	404	2009	0.0774686	0.113642	0.151364	C34	通用设备制造业	江西省	景德镇市
000404	华意压缩	404	2010	0.0247901	0.11159	0.195446	C34	通用设备制造业	江西省	景德镇市
000404	华意压缩	404	2011	0.0604114	0.117386	0.228845	C34	通用设备制造业	江西省	景德镇市
000404	华意压缩	404	2012	0.0221053	0.154543	0.23457	C34	通用设备制造业	江西省	景德镇市
000404	华意压缩	404	2013	0.0437497	0.0883895	0.209298	C34	通用设备制造业	江西省	景德镇市
000404	华意压缩	404	2014	0.284021	0.095098	0.163495	C34	通用设备制造业	江西省	景德镇市
000404	华意压缩	404	2015	0.924532	0.147851	0.125472	C34	通用设备制造业	江西省	景德镇市
000404	华意压缩	404	2016	0.804001	0.146581	0.0255088	C34	通用设备制造业	江西省	景德镇市
000404	华意压缩	404	2017	0.851592	0.0701247	0.111121	C34	通用设备制造业	江西省	景德镇市
000404	长虹华意	404	2018	0.285791	0.0689756	0.205466	C34	通用设备制造业	江西省	景德镇市
000404	长虹华意	404	2019	0.183113	0.0611311	0.262412	C34	通用设备制造业	江西省	景德镇市
000404	长虹华意	404	2020	0.803913	0.0895114	0.233888	C34	通用设备制造业	江西省	景德镇市
000404	长虹华意	404	2021	0.523374	0.0881815	0.428825	C34	通用设备制造业	江西省	景德镇市
000404	长虹华意	404	2022	0.785227	0.163556	0.350627	C34	通用设备制造业	江西省	景德镇市
000404	长虹华意	404	2023	0.640284	0.0672355	0.243602	C34	通用设备制造业	江西省	景德镇市
000405	有色鑫光	405	2000	0.61903	0.0795348	-0.0130097	C32	有色金属冶炼及压延加工业	广东省	珠海市
000405	有色鑫光	405	2001	0.383182	0.118115	-0.0340923	C32	有色金属冶炼及压延加工业	广东省	珠海市
000406	石油大明	406	2000	0.613911	0.128636	0.0615623	B07	石油和天然气开采业	山东省	东营市
000406	石油大明	406	2001	0.429661	0.0714719	0.036707	B07	石油和天然气开采业	山东省	东营市
000406	石油大明	406	2002	0.403123	0.0612449	0.032047	B07	石油和天然气开采业	山东省	东营市
000406	石油大明	406	2003	0.231662	0.070331	0.00784795	B07	石油和天然气开采业	山东省	东营市
000406	石油大明	406	2004	0.0571073	0.0881871	0.0715873	B07	石油和天然气开采业	山东省	东营市
000406	石油大明	406	2005	0.0128158	0.106904	0.0884606	B07	石油和天然气开采业	山东省	东营市
000407	胜利股份	407	2000	0.603398	0.13826	0.0499083	C29	橡胶和塑料制品业	山东省	济南市
000407	胜利股份	407	2001	0.40973	0.0739002	-0.00750239	C29	橡胶和塑料制品业	山东省	济南市
000407	胜利股份	407	2002	0.379609	0.0657913	-0.0378545	C29	橡胶和塑料制品业	山东省	济南市
000407	胜利股份	407	2003	0.233482	0.0553482	-0.0231634	C29	橡胶和塑料制品业	山东省	济南市
000407	胜利股份	407	2004	0.0549355	0.087676	0.00127326	C29	橡胶和塑料制品业	山东省	济南市
000407	胜利股份	407	2005	0.0119334	0.0872958	0.0395508	C29	橡胶和塑料制品业	山东省	济南市
000407	胜利股份	407	2006	0.0265279	0.146864	0.0302167	C29	橡胶和塑料制品业	山东省	济南市
000407	胜利股份	407	2007	0.0209108	0.272131	0.0407626	C29	橡胶和塑料制品业	山东省	济南市
000407	胜利股份	407	2008	0.0562683	0.177395	0.0700951	C29	橡胶和塑料制品业	山东省	济南市
000407	胜利股份	407	2009	0.0740615	0.139844	0.043437	C29	橡胶和塑料制品业	山东省	济南市
000407	胜利股份	407	2010	0.0233306	0.118266	0.0906919	C29	橡胶和塑料制品业	山东省	济南市
000407	胜利股份	407	2011	0.0588655	0.105272	0.0489413	C29	橡胶和塑料制品业	山东省	济南市
000407	胜利股份	407	2012	0.0210151	0.14021	0.0726715	C26	化学原料及化学制品制造业	山东省	济南市
000407	胜利股份	407	2013	0.0416722	0.11059	0.00802988	C26	化学原料及化学制品制造业	山东省	济南市
000407	胜利股份	407	2014	0.29224	0.0699069	0.0583577	C26	化学原料及化学制品制造业	山东省	济南市
000407	胜利股份	407	2015	0.924534	0.124011	0.0322737	C26	化学原料及化学制品制造业	山东省	济南市
000407	胜利股份	407	2016	0.725876	0.201144	0.0416979	D45	燃气生产和供应业	山东省	济南市
000407	胜利股份	407	2017	0.846302	0.0824181	0.0955649	D45	燃气生产和供应业	山东省	济南市
000407	胜利股份	407	2018	0.264782	0.101527	0.21664	D45	燃气生产和供应业	山东省	济南市
000407	胜利股份	407	2019	0.179294	0.0774053	0.269849	D45	燃气生产和供应业	山东省	济南市
000407	胜利股份	407	2020	0.761603	0.127191	0.0768402	D45	燃气生产和供应业	山东省	济南市
000407	胜利股份	407	2021	0.517056	0.100498	-0.0128178	D45	燃气生产和供应业	山东省	济南市
000407	胜利股份	407	2022	0.808066	0.120907	-0.0703036	D45	燃气生产和供应业	山东省	济南市
000407	胜利股份	407	2023	0.650822	0.0375847	0.00808083	D45	燃气生产和供应业	山东省	济南市
000408	河北华玉	408	2000	0.612264	0.112513	0.0278813	C30	非金属矿物制品业	河北省	邯郸市
000408	河北华玉	408	2001	0.405414	0.105335	0.00728519	C30	非金属矿物制品业	河北省	邯郸市
000408	河北华玉	408	2002	0.378906	0.0780688	0.00709432	C30	非金属矿物制品业	河北省	邯郸市
000408	河北华玉	408	2003	0.219316	0.083202	-0.0242526	C30	非金属矿物制品业	河北省	邯郸市
000408	河北华玉	408	2004	0.0491133	0.112321	-0.0114968	C30	非金属矿物制品业	河北省	邯郸市
000408	玉源控股	408	2005	0.0114537	0.0964131	-0.0165498	C30	非金属矿物制品业	河北省	邯郸市
000408	玉源控股	408	2009	0.0726355	0.160761	-0.000779846	C30	非金属矿物制品业	河北省	邯郸市
000408	金谷源	408	2012	0.0204663	0.113165	-0.0108966	F51	批发业	河北省	邯郸市
000408	金谷源	408	2013	0.0415474	0.114577	-0.00305078	F51	批发业	河北省	邯郸市
000408	金谷源	408	2014	0.194191	0.302068	-0.0162286	F51	批发业	河北省	邯郸市
000408	金谷源	408	2015	0.910891	0.244042	0.00866506	F51	批发业	河北省	邯郸市
000408	藏格控股	408	2017	0.846664	0.0836135	0.311653	C26	化学原料及化学制品制造业	青海省	格尔木市
000408	藏格控股	408	2018	0.283022	0.07386	0.256066	C26	化学原料及化学制品制造业	青海省	格尔木市
000408	藏格控股	408	2019	0.162567	0.136823	-0.0584326	C26	化学原料及化学制品制造业	青海省	格尔木市
000408	藏格矿业	408	2021	0.479919	0.237996	0.0942026	C26	化学原料及化学制品制造业	青海省	格尔木市
000408	藏格矿业	408	2022	0.796989	0.143257	0.617536	C26	化学原料及化学制品制造业	青海省	格尔木市
000408	藏格矿业	408	2023	0.643861	0.0585382	0.332223	C26	化学原料及化学制品制造业	青海省	格尔木市
000409	四通高科	409	2000	0.63379	0.0582852	-0.0106259	C35	专用设备制造业	广东省	深圳市
000409	四通高科	409	2001	0.393586	0.13306	0.00176411	C35	专用设备制造业	广东省	深圳市
000409	四通高科	409	2002	0.364958	0.0900907	0.00175994	C35	专用设备制造业	广东省	深圳市
000409	山东地矿	409	2013	0.0418931	0.133399	0.0390076	B08	黑色金属矿采选业	山东省	济南市
000409	山东地矿	409	2014	0.273933	0.112155	0.023065	B08	黑色金属矿采选业	山东省	济南市
000409	山东地矿	409	2015	0.91083	0.247133	0.192054	B08	黑色金属矿采选业	山东省	济南市
000409	山东地矿	409	2016	0.682936	0.231212	0.180836	S90	综合	山东省	济南市
000409	山东地矿	409	2017	0.835692	0.10752	0.111261	S90	综合	山东省	济南市
000409	云鼎科技	409	2021	0.513361	0.108074	-0.255719	I65	软件和信息技术服务业	山东省	济南市
000409	云鼎科技	409	2022	0.79707	0.140595	-0.112796	I65	软件和信息技术服务业	山东省	济南市
000409	云鼎科技	409	2023	0.616807	0.126236	-0.102202	I65	软件和信息技术服务业	山东省	济南市
000410	沈阳机床	410	2000	0.625872	0.0826667	0.0115515	C34	通用设备制造业	辽宁省	沈阳市
000410	沈阳机床	410	2001	0.419402	0.0837427	0.022638	C34	通用设备制造业	辽宁省	沈阳市
000410	沈阳机床	410	2002	0.392032	0.0803101	0.0646327	C34	通用设备制造业	辽宁省	沈阳市
000410	沈阳机床	410	2003	0.236609	0.100308	0.116685	C34	通用设备制造业	辽宁省	沈阳市
000410	沈阳机床	410	2004	0.0465415	0.160834	0.23701	C34	通用设备制造业	辽宁省	沈阳市
000410	G 沈机	410	2005	0.0179974	0.0765336	0.327366	C34	通用设备制造业	辽宁省	沈阳市
000410	沈阳机床	410	2006	0.0324479	0.12712	0.353097	C34	通用设备制造业	辽宁省	沈阳市
000410	沈阳机床	410	2007	0.0248834	0.169157	0.277158	C34	通用设备制造业	辽宁省	沈阳市
000410	沈阳机床	410	2008	0.0583098	0.188921	0.21969	C34	通用设备制造业	辽宁省	沈阳市
000410	沈阳机床	410	2009	0.0748239	0.153024	0.0694138	C34	通用设备制造业	辽宁省	沈阳市
000410	沈阳机床	410	2010	0.0250599	0.120906	0.216359	C34	通用设备制造业	辽宁省	沈阳市
000410	沈阳机床	410	2011	0.0611943	0.0997922	0.306542	C34	通用设备制造业	辽宁省	沈阳市
000410	沈阳机床	410	2012	0.0217641	0.121432	0.180918	C34	通用设备制造业	辽宁省	沈阳市
000410	沈阳机床	410	2013	0.0409973	0.0929854	-0.0667914	C34	通用设备制造业	辽宁省	沈阳市
000410	沈阳机床	410	2014	0.237961	0.188313	-0.17959	C34	通用设备制造业	辽宁省	沈阳市
000410	沈阳机床	410	2015	0.908641	0.25803	-0.140298	C34	通用设备制造业	辽宁省	沈阳市
000410	沈阳机床	410	2016	0.789846	0.156382	-0.113527	C34	通用设备制造业	辽宁省	沈阳市
000410	沈阳机床	410	2018	0.264446	0.0977679	-0.136901	C34	通用设备制造业	辽宁省	沈阳市
000410	沈阳机床	410	2023	0.636822	0.0745034	0.0158264	C34	通用设备制造业	辽宁省	沈阳市
000411	英特集团	411	2005	0.0132539	0.106271	0.109301	F52	零售业	浙江省	杭州市
000411	英特集团	411	2006	0.0282448	0.1368	0.11054	F52	零售业	浙江省	杭州市
000411	英特集团	411	2007	0.0222366	0.320029	0.129858	F52	零售业	浙江省	杭州市
000411	英特集团	411	2008	0.0576001	0.177546	0.162356	F52	零售业	浙江省	杭州市
000411	英特集团	411	2009	0.0800516	0.0970681	0.233498	F52	零售业	浙江省	杭州市
000411	英特集团	411	2010	0.026667	0.0717286	0.325589	F51	批发业	浙江省	杭州市
000411	英特集团	411	2011	0.0624484	0.0923687	0.442747	F51	批发业	浙江省	杭州市
000411	英特集团	411	2012	0.0243047	0.0885412	0.551284	F51	批发业	浙江省	杭州市
000411	英特集团	411	2013	0.0472865	0.106238	0.573105	F51	批发业	浙江省	杭州市
000411	英特集团	411	2014	0.284976	0.112928	0.554746	F51	批发业	浙江省	杭州市
000411	英特集团	411	2015	0.896122	0.356947	0.487648	F51	批发业	浙江省	杭州市
000411	英特集团	411	2016	0.783484	0.161184	0.488802	F51	批发业	浙江省	杭州市
000411	英特集团	411	2017	0.865436	0.0410943	0.483352	F51	批发业	浙江省	杭州市
000411	英特集团	411	2018	0.216821	0.178988	0.50257	F51	批发业	浙江省	杭州市
000411	英特集团	411	2019	0.182575	0.0788927	0.73436	F51	批发业	浙江省	杭州市
000411	英特集团	411	2020	0.620947	0.254625	0.610087	F51	批发业	浙江省	杭州市
000411	英特集团	411	2021	0.515043	0.123144	0.623884	F51	批发业	浙江省	杭州市
000411	英特集团	411	2022	0.817372	0.106433	0.601833	F51	批发业	浙江省	杭州市
000411	英特集团	411	2023	0.645608	0.0569562	0.704392	F51	批发业	浙江省	杭州市
000412	北方五环	412	2000	0.617242	0.0844431	-0.00907868	S90	综合	吉林省	长春市
000412	北方五环	412	2001	0.381053	0.151094	-0.0130276	S90	综合	吉林省	长春市
000413	宝石A	413	2000	0.607122	0.07631	-0.0517308	C39	计算机、通信和其他电子设备制造业	河北省	石家庄市
000413	宝石A	413	2001	0.408215	0.0908442	0.00234643	C39	计算机、通信和其他电子设备制造业	河北省	石家庄市
000413	宝石A	413	2002	0.364088	0.0917088	0.00478997	C39	计算机、通信和其他电子设备制造业	河北省	石家庄市
000413	宝石A	413	2003	0.229597	0.0728928	0.0035978	C39	计算机、通信和其他电子设备制造业	河北省	石家庄市
000413	宝石A	413	2004	0.041172	0.150966	0.0050544	C39	计算机、通信和其他电子设备制造业	河北省	石家庄市
000413	宝石A	413	2005	0.0114537	0.102409	0.00251222	C39	计算机、通信和其他电子设备制造业	河北省	石家庄市
000413	宝石A	413	2006	0.0262313	0.142611	-0.00205841	C39	计算机、通信和其他电子设备制造业	河北省	石家庄市
000413	宝石A	413	2008	0.0550326	0.216193	0.0126481	C39	计算机、通信和其他电子设备制造业	河北省	石家庄市
000413	宝石A	413	2009	0.0727026	0.147981	0.000172423	C39	计算机、通信和其他电子设备制造业	河北省	石家庄市
000413	宝石A	413	2010	0.0218618	0.12329	-0.0149788	C39	计算机、通信和其他电子设备制造业	河北省	石家庄市
000413	宝石A	413	2011	0.0583415	0.104626	-0.01008	C39	计算机、通信和其他电子设备制造业	河北省	石家庄市
000413	宝石A	413	2012	0.0210439	0.0900831	0.0716898	C39	计算机、通信和其他电子设备制造业	河北省	石家庄市
000413	东旭光电	413	2013	0.0424112	0.117749	0.0853547	C39	计算机、通信和其他电子设备制造业	河北省	石家庄市
000413	东旭光电	413	2014	0.269024	0.133273	0.203897	C39	计算机、通信和其他电子设备制造业	河北省	石家庄市
000413	东旭光电	413	2015	0.920152	0.183067	0.387127	C39	计算机、通信和其他电子设备制造业	河北省	石家庄市
000413	东旭光电	413	2016	0.755183	0.18101	0.596942	C39	计算机、通信和其他电子设备制造业	河北省	石家庄市
000413	东旭光电	413	2017	0.849231	0.0890174	1.5193	C39	计算机、通信和其他电子设备制造业	河北省	石家庄市
000413	东旭光电	413	2018	0.300371	0.0724997	2.35615	C39	计算机、通信和其他电子设备制造业	河北省	石家庄市
000413	东旭光电	413	2019	0.159759	0.185436	1.06274	C39	计算机、通信和其他电子设备制造业	河北省	石家庄市
000413	东旭光电	413	2020	0.788683	0.100596	-1.02876	C39	计算机、通信和其他电子设备制造业	河北省	石家庄市
000413	东旭光电	413	2021	0.507949	0.0795141	-2.25798	C39	计算机、通信和其他电子设备制造业	河北省	石家庄市
000413	东旭光电	413	2022	0.836098	0.0665742	-1.16362	C39	计算机、通信和其他电子设备制造业	河北省	石家庄市
000413	东旭光电	413	2023	0.642724	0.0568239	-0.248499	C39	计算机、通信和其他电子设备制造业	河北省	石家庄市
000415	汇通水利	415	2000	0.601324	0.118721	0.00887889	E48	土木工程建筑业	新疆维吾尔自治区	乌鲁木齐市
000415	汇通水利	415	2001	0.411858	0.0892618	0.00952878	E48	土木工程建筑业	新疆维吾尔自治区	乌鲁木齐市
000415	汇通水利	415	2002	0.277581	0.175325	0.00677257	E48	土木工程建筑业	新疆维吾尔自治区	乌鲁木齐市
000415	汇通水利	415	2003	0.226815	0.0833098	0.0168964	E48	土木工程建筑业	新疆维吾尔自治区	乌鲁木齐市
000415	汇通水利	415	2004	0.0466315	0.127371	0.0137536	E48	土木工程建筑业	新疆维吾尔自治区	乌鲁木齐市
000415	汇通水利	415	2005	0.0114537	0.111935	0.00433866	E48	土木工程建筑业	新疆维吾尔自治区	乌鲁木齐市
000415	汇通水利	415	2006	0.0280777	0.101245	-0.00947092	E48	土木工程建筑业	新疆维吾尔自治区	乌鲁木齐市
000415	汇通集团	415	2007	0.020287	0.256306	-0.000331047	E48	土木工程建筑业	新疆维吾尔自治区	乌鲁木齐市
000415	汇通集团	415	2008	0.0549913	0.193832	-0.00637752	E48	土木工程建筑业	新疆维吾尔自治区	乌鲁木齐市
000415	汇通集团	415	2009	0.0728212	0.116191	0.000967711	E48	土木工程建筑业	新疆维吾尔自治区	乌鲁木齐市
000415	渤海租赁	415	2011	0.0589751	0.144101	0.0831577	L71	租赁业	新疆维吾尔自治区	乌鲁木齐市
000415	渤海租赁	415	2012	0.0220429	0.138724	0.223741	L71	租赁业	新疆维吾尔自治区	乌鲁木齐市
000415	渤海租赁	415	2013	0.0476196	0.103496	0.605684	L71	租赁业	新疆维吾尔自治区	乌鲁木齐市
000415	渤海租赁	415	2014	0.29674	0.0858245	0.578331	L71	租赁业	新疆维吾尔自治区	乌鲁木齐市
000415	渤海金控	415	2015	0.913547	0.235236	0.716718	L71	租赁业	新疆维吾尔自治区	乌鲁木齐市
000415	渤海金控	415	2016	0.820977	0.135778	1.78811	L71	租赁业	新疆维吾尔自治区	乌鲁木齐市
000415	渤海金控	415	2017	0.875149	0.04122	2.90824	L71	租赁业	新疆维吾尔自治区	乌鲁木齐市
000415	渤海租赁	415	2018	0.274294	0.122499	3.16317	L71	租赁业	新疆维吾尔自治区	乌鲁木齐市
000415	渤海租赁	415	2019	0.177022	0.125854	1.45452	L71	租赁业	新疆维吾尔自治区	乌鲁木齐市
000415	渤海租赁	415	2020	0.822419	0.0706583	-0.851663	L71	租赁业	新疆维吾尔自治区	乌鲁木齐市
000415	渤海租赁	415	2021	0.512949	0.0808069	-1.45001	L71	租赁业	新疆维吾尔自治区	乌鲁木齐市
000415	渤海租赁	415	2022	0.836788	0.0669673	-0.688095	L71	租赁业	新疆维吾尔自治区	乌鲁木齐市
000415	渤海租赁	415	2023	0.639647	0.0720112	0.625703	L71	租赁业	新疆维吾尔自治区	乌鲁木齐市
000416	青岛国货	416	2000	0.578466	0.133693	-0.0272172	C14	食品制造业	山东省	青岛市
000416	健特生物	416	2002	0.361982	0.0984487	0.0230655	C14	食品制造业	山东省	青岛市
000416	健特生物	416	2003	0.21589	0.113	0.038477	C14	食品制造业	山东省	青岛市
000416	健特生物	416	2004	0.047098	0.127372	0.0281225	C14	食品制造业	山东省	青岛市
000416	健特生物	416	2005	0.0119276	0.125432	0.0519306	C14	食品制造业	山东省	青岛市
000416	健特生物	416	2006	0.0272801	0.137678	0.0507386	C14	食品制造业	山东省	青岛市
000416	华馨实业	416	2007	0.0206517	0.272391	0.0245424	C14	食品制造业	山东省	青岛市
000416	民生投资	416	2008	0.0548243	0.174716	-0.0317557	C14	食品制造业	山东省	青岛市
000416	民生投资	416	2009	0.071321	0.167081	-0.0427819	C14	食品制造业	山东省	青岛市
000416	民生投资	416	2010	0.0220089	0.107679	-0.00660771	F52	零售业	山东省	青岛市
000416	民生投资	416	2011	0.0585293	0.0954817	0.00577201	F52	零售业	山东省	青岛市
000416	民生投资	416	2012	0.0204522	0.0999015	-0.0143412	F52	零售业	山东省	青岛市
000416	民生投资	416	2013	0.0411806	0.160608	-0.0225733	F52	零售业	山东省	青岛市
000416	民生控股	416	2014	0.281556	0.0913025	-0.0256264	F52	零售业	山东省	青岛市
000417	合肥百货	417	2000	0.641748	0.062645	0.0192347	F52	零售业	安徽省	合肥市
000417	合肥百货	417	2001	0.432724	0.0647048	0.0384618	F52	零售业	安徽省	合肥市
000417	合肥百货	417	2002	0.388597	0.0786269	0.0453264	F52	零售业	安徽省	合肥市
000417	合肥百货	417	2003	0.246671	0.0605068	0.0627809	F52	零售业	安徽省	合肥市
000417	合肥百货	417	2004	0.0555883	0.100448	0.10764	F52	零售业	安徽省	合肥市
000417	G 合百大	417	2005	0.0138316	0.0913352	0.132103	F52	零售业	安徽省	合肥市
000417	合肥百货	417	2006	0.030492	0.112157	0.180439	F52	零售业	安徽省	合肥市
000417	合肥百货	417	2007	0.0233591	0.226938	0.18872	F52	零售业	安徽省	合肥市
000417	合肥百货	417	2008	0.059342	0.138478	0.254636	F52	零售业	安徽省	合肥市
000417	合肥百货	417	2009	0.0810476	0.100513	0.266111	F52	零售业	安徽省	合肥市
000417	合肥百货	417	2010	0.0264336	0.0770543	0.309459	F52	零售业	安徽省	合肥市
000417	合肥百货	417	2011	0.0614979	0.11792	0.350774	F52	零售业	安徽省	合肥市
000417	合肥百货	417	2012	0.0227242	0.119909	0.322009	F52	零售业	安徽省	合肥市
000417	合肥百货	417	2013	0.0444294	0.106576	0.284831	F52	零售业	安徽省	合肥市
000417	合肥百货	417	2014	0.288182	0.08398	0.14207	F52	零售业	安徽省	合肥市
000417	合肥百货	417	2015	0.924534	0.144279	0.0659272	F52	零售业	安徽省	合肥市
000417	合肥百货	417	2016	0.841962	0.120047	-0.0174169	F52	零售业	安徽省	合肥市
000417	合肥百货	417	2017	0.854812	0.0618958	0.0417735	F52	零售业	安徽省	合肥市
000417	合肥百货	417	2018	0.283735	0.0707706	0.0917164	F52	零售业	安徽省	合肥市
000417	合肥百货	417	2019	0.17712	0.0815144	0.117272	F52	零售业	安徽省	合肥市
000417	合肥百货	417	2020	0.766579	0.12173	-0.406017	F52	零售业	安徽省	合肥市
000417	合肥百货	417	2021	0.526381	0.0564672	-0.434414	F52	零售业	安徽省	合肥市
000417	合肥百货	417	2022	0.839501	0.0628564	-0.460666	F52	零售业	安徽省	合肥市
000417	合肥百货	417	2023	0.62889	0.095547	0.0358301	F52	零售业	安徽省	合肥市
000418	小天鹅A	418	2000	0.668745	0.0597336	0.0885507	C38	电气机械及器材制造业	江苏省	无锡市
000418	小天鹅A	418	2001	0.413459	0.0581388	-0.0112941	C38	电气机械及器材制造业	江苏省	无锡市
000418	小天鹅A	418	2002	0.368983	0.0882492	0.00960638	C38	电气机械及器材制造业	江苏省	无锡市
000418	小天鹅A	418	2005	0.0117003	0.153875	0.0504471	C38	电气机械及器材制造业	江苏省	无锡市
000418	小天鹅A	418	2006	0.0290102	0.128782	0.135502	C38	电气机械及器材制造业	江苏省	无锡市
000418	小天鹅A	418	2007	0.02455	0.181504	0.257776	C38	电气机械及器材制造业	江苏省	无锡市
000418	小天鹅A	418	2008	0.0564935	0.201735	0.103282	C38	电气机械及器材制造业	江苏省	无锡市
000418	小天鹅A	418	2009	0.073038	0.156844	0.0118907	C38	电气机械及器材制造业	江苏省	无锡市
000418	小天鹅A	418	2010	0.0306511	0.112443	0.620168	C38	电气机械及器材制造业	江苏省	无锡市
000418	小天鹅A	418	2011	0.064604	0.0644211	0.668263	C38	电气机械及器材制造业	江苏省	无锡市
000418	小天鹅A	418	2012	0.0222357	0.142136	0.252462	C38	电气机械及器材制造业	江苏省	无锡市
000418	小天鹅A	418	2013	0.0390787	0.127223	-0.247441	C38	电气机械及器材制造业	江苏省	无锡市
000418	小天鹅A	418	2014	0.288948	0.0739447	-0.0171404	C38	电气机械及器材制造业	江苏省	无锡市
000418	小天鹅A	418	2015	0.924534	0.101951	0.623176	C38	电气机械及器材制造业	江苏省	无锡市
000418	小天鹅A	418	2016	0.858997	0.108616	0.760696	C38	电气机械及器材制造业	江苏省	无锡市
000418	小天鹅A	418	2017	0.838988	0.108738	1.05805	C38	电气机械及器材制造业	江苏省	无锡市
000418	小天鹅A	418	2018	0.27795	0.0912985	1.05053	C38	电气机械及器材制造业	江苏省	无锡市
000419	通程控股	419	2000	0.596582	0.129801	0.0157974	F52	零售业	湖南省	长沙市
000419	通程控股	419	2001	0.417946	0.0740794	0.0116516	F52	零售业	湖南省	长沙市
000419	通程控股	419	2002	0.353944	0.101344	0.00436232	F52	零售业	湖南省	长沙市
000419	通程控股	419	2003	0.220953	0.0903132	0.00408674	F52	零售业	湖南省	长沙市
000419	通程控股	419	2004	0.0542963	0.0938516	0.0233094	F52	零售业	湖南省	长沙市
000419	通程控股	419	2005	0.0117588	0.0788669	0.0283634	F52	零售业	湖南省	长沙市
000419	通程控股	419	2006	0.0243448	0.197785	0.0451654	F52	零售业	湖南省	长沙市
000419	通程控股	419	2007	0.0215627	0.190597	0.0715344	F52	零售业	湖南省	长沙市
000419	通程控股	419	2008	0.056002	0.221607	0.0836394	F52	零售业	湖南省	长沙市
000419	通程控股	419	2009	0.0766592	0.11393	0.125153	F52	零售业	湖南省	长沙市
000419	通程控股	419	2010	0.0244343	0.0864557	0.165995	F52	零售业	湖南省	长沙市
000419	通程控股	419	2011	0.0602641	0.080884	0.191734	F52	零售业	湖南省	长沙市
000419	通程控股	419	2012	0.0215553	0.0882111	0.146736	F52	零售业	湖南省	长沙市
000419	通程控股	419	2013	0.0424348	0.152172	0.10082	F52	零售业	湖南省	长沙市
000419	通程控股	419	2014	0.28448	0.0885006	0.0567455	F52	零售业	湖南省	长沙市
000419	通程控股	419	2015	0.924534	0.142021	0.0294511	F52	零售业	湖南省	长沙市
000419	通程控股	419	2016	0.819627	0.135625	-0.0489987	F52	零售业	湖南省	长沙市
000419	通程控股	419	2017	0.857571	0.0546585	-0.0371695	F52	零售业	湖南省	长沙市
000419	通程控股	419	2018	0.285779	0.0660235	-0.0400093	F52	零售业	湖南省	长沙市
000419	通程控股	419	2019	0.175897	0.0817506	-0.0318293	F52	零售业	湖南省	长沙市
000419	通程控股	419	2020	0.813371	0.0801701	-0.178067	F52	零售业	湖南省	长沙市
000419	通程控股	419	2021	0.526	0.0644343	-0.161023	F52	零售业	湖南省	长沙市
000419	通程控股	419	2022	0.789034	0.154975	-0.147033	F52	零售业	湖南省	长沙市
000419	通程控股	419	2023	0.628458	0.0962745	-0.0145746	F52	零售业	湖南省	长沙市
000420	吉林化纤	420	2000	0.639797	0.0586957	0.00671062	C28	化学纤维制造业	吉林省	吉林市
000420	吉林化纤	420	2001	0.425799	0.0752775	0.0307703	C28	化学纤维制造业	吉林省	吉林市
000420	吉林化纤	420	2002	0.337716	0.121053	0.0203241	C28	化学纤维制造业	吉林省	吉林市
000420	吉林化纤	420	2003	0.23745	0.0658705	0.0271967	C28	化学纤维制造业	吉林省	吉林市
000420	吉林化纤	420	2004	0.0527746	0.102531	0.0350861	C28	化学纤维制造业	吉林省	吉林市
000420	G 吉纤	420	2005	0.0114537	0.116862	0.024964	C28	化学纤维制造业	吉林省	吉林市
000420	吉林化纤	420	2006	0.028431	0.107643	0.033064	C28	化学纤维制造业	吉林省	吉林市
000420	吉林化纤	420	2007	0.021583	0.278195	0.0836748	C28	化学纤维制造业	吉林省	吉林市
000420	吉林化纤	420	2008	0.0562094	0.159435	0.053034	C28	化学纤维制造业	吉林省	吉林市
000420	吉林化纤	420	2009	0.0739795	0.107793	0.0377093	C28	化学纤维制造业	吉林省	吉林市
000420	吉林化纤	420	2010	0.0223073	0.0907784	0.0125421	C28	化学纤维制造业	吉林省	吉林市
000420	吉林化纤	420	2011	0.0587006	0.145589	0.0532638	C28	化学纤维制造业	吉林省	吉林市
000420	吉林化纤	420	2013	0.0407508	0.0871352	-0.0938983	C28	化学纤维制造业	吉林省	吉林市
000420	吉林化纤	420	2014	0.266723	0.121736	-0.128013	C28	化学纤维制造业	吉林省	吉林市
000420	吉林化纤	420	2015	0.919411	0.182039	-0.0513358	C28	化学纤维制造业	吉林省	吉林市
000420	吉林化纤	420	2016	0.870891	0.0998569	-4.63444e-05	C28	化学纤维制造业	吉林省	吉林市
000420	吉林化纤	420	2017	0.845678	0.0840799	0.116081	C28	化学纤维制造业	吉林省	吉林市
000420	吉林化纤	420	2018	0.307032	0.0355619	0.152617	C28	化学纤维制造业	吉林省	吉林市
000420	吉林化纤	420	2019	0.165248	0.131747	0.129605	C28	化学纤维制造业	吉林省	吉林市
000420	吉林化纤	420	2020	0.82714	0.06823	0.0301892	C28	化学纤维制造业	吉林省	吉林市
000420	吉林化纤	420	2021	0.479804	0.238595	0.101775	C28	化学纤维制造业	吉林省	吉林市
000420	吉林化纤	420	2022	0.789244	0.155439	0.0979075	C28	化学纤维制造业	吉林省	吉林市
000420	吉林化纤	420	2023	0.639176	0.0691803	0.123702	C28	化学纤维制造业	吉林省	吉林市
000421	南京中北	421	2000	0.647114	0.0565318	0.0230134	O79	居民服务业	江苏省	南京市
000421	南京中北	421	2001	0.421858	0.0746435	0.0211503	O79	居民服务业	江苏省	南京市
000421	南京中北	421	2002	0.373081	0.0925227	0.0414132	O79	居民服务业	江苏省	南京市
000421	南京中北	421	2003	0.239473	0.0604651	0.0234529	O79	居民服务业	江苏省	南京市
000421	南京中北	421	2004	0.0505988	0.113457	0.0419049	O79	居民服务业	江苏省	南京市
000421	南京中北	421	2005	0.011818	0.0661324	0.0269822	O79	居民服务业	江苏省	南京市
000421	南京中北	421	2006	0.0258273	0.172297	0.0629388	O79	居民服务业	江苏省	南京市
000421	南京中北	421	2007	0.0219828	0.216706	0.101121	O79	居民服务业	江苏省	南京市
000421	南京中北	421	2008	0.0565682	0.160222	0.0784296	O79	居民服务业	江苏省	南京市
000421	南京中北	421	2009	0.0739316	0.103717	0.0357637	O79	居民服务业	江苏省	南京市
000421	南京中北	421	2010	0.0219218	0.134984	-0.0089232	O79	居民服务业	江苏省	南京市
000421	南京中北	421	2011	0.05827	0.0969623	-0.0224136	O79	居民服务业	江苏省	南京市
000421	南京中北	421	2012	0.0206788	0.10375	0.0193982	S90	综合	江苏省	南京市
000421	南京中北	421	2013	0.0416424	0.0770738	-0.0077197	S90	综合	江苏省	南京市
000421	南京中北	421	2014	0.289161	0.0745017	0.0036348	S90	综合	江苏省	南京市
000421	南京中北	421	2015	0.922727	0.162206	0.222473	D45	燃气生产和供应业	江苏省	南京市
000421	南京公用	421	2016	0.820012	0.135518	0.222195	D45	燃气生产和供应业	江苏省	南京市
000421	南京公用	421	2017	0.865164	0.0390836	0.203774	D45	燃气生产和供应业	江苏省	南京市
000421	南京公用	421	2018	0.294974	0.0517441	-0.0476148	D45	燃气生产和供应业	江苏省	南京市
000421	南京公用	421	2019	0.18228	0.0550437	-0.029396	D45	燃气生产和供应业	江苏省	南京市
000421	南京公用	421	2020	0.552408	0.315597	0.323033	D45	燃气生产和供应业	江苏省	南京市
000421	南京公用	421	2021	0.513769	0.112943	0.00807938	D45	燃气生产和供应业	江苏省	南京市
000421	南京公用	421	2022	0.788385	0.157863	0.351887	D45	燃气生产和供应业	江苏省	南京市
000421	南京公用	421	2023	0.632916	0.0828659	-0.220763	D45	燃气生产和供应业	江苏省	南京市
000422	湖北宜化	422	2000	0.645504	0.0523629	0.0110323	C26	化学原料及化学制品制造业	湖北省	宜昌市
000422	湖北宜化	422	2001	0.423164	0.0733695	0.0231671	C26	化学原料及化学制品制造业	湖北省	宜昌市
000422	湖北宜化	422	2002	0.36601	0.0981627	0.0369487	C26	化学原料及化学制品制造业	湖北省	宜昌市
000422	湖北宜化	422	2003	0.25201	0.0487522	0.0597597	C26	化学原料及化学制品制造业	湖北省	宜昌市
000422	湖北宜化	422	2004	0.0618887	0.0714381	0.105653	C26	化学原料及化学制品制造业	湖北省	宜昌市
000422	G 宜化	422	2005	0.0142378	0.0911209	0.151553	C26	化学原料及化学制品制造业	湖北省	宜昌市
000422	湖北宜化	422	2006	0.0303621	0.121118	0.199545	C26	化学原料及化学制品制造业	湖北省	宜昌市
000422	湖北宜化	422	2007	0.0257519	0.272386	0.344438	C26	化学原料及化学制品制造业	湖北省	宜昌市
000422	湖北宜化	422	2008	0.0623562	0.165165	0.482497	C26	化学原料及化学制品制造业	湖北省	宜昌市
000422	湖北宜化	422	2009	0.0904979	0.15218	0.577381	C26	化学原料及化学制品制造业	湖北省	宜昌市
000422	湖北宜化	422	2010	0.0309359	0.154815	0.646999	C26	化学原料及化学制品制造业	湖北省	宜昌市
000422	湖北宜化	422	2011	0.06786	0.118665	1.06341	C26	化学原料及化学制品制造业	湖北省	宜昌市
000422	湖北宜化	422	2012	0.0277406	0.110482	1.0591	C26	化学原料及化学制品制造业	湖北省	宜昌市
000422	湖北宜化	422	2013	0.0492606	0.109211	0.773503	C26	化学原料及化学制品制造业	湖北省	宜昌市
000422	湖北宜化	422	2014	0.290799	0.0725187	0.0417058	C26	化学原料及化学制品制造业	湖北省	宜昌市
000422	湖北宜化	422	2015	0.924534	0.0989122	-0.101424	C26	化学原料及化学制品制造业	湖北省	宜昌市
000422	湖北宜化	422	2016	0.878827	0.0940712	-0.409805	C26	化学原料及化学制品制造业	湖北省	宜昌市
000422	湖北宜化	422	2017	0.835917	0.100039	-0.622647	C26	化学原料及化学制品制造业	湖北省	宜昌市
000422	湖北宜化	422	2021	0.426886	0.442198	0.57318	C26	化学原料及化学制品制造业	湖北省	宜昌市
000422	湖北宜化	422	2022	0.796144	0.144739	0.60525	C26	化学原料及化学制品制造业	湖北省	宜昌市
000422	湖北宜化	422	2023	0.633297	0.0862801	0.323734	C26	化学原料及化学制品制造业	湖北省	宜昌市
000423	东阿阿胶	423	2000	0.640671	0.0655905	0.0215795	C27	医药制造业	山东省	聊城市
000423	东阿阿胶	423	2001	0.42718	0.0611262	0.0228119	C27	医药制造业	山东省	聊城市
000423	东阿阿胶	423	2002	0.413374	0.0506019	0.0289662	C27	医药制造业	山东省	聊城市
000423	东阿阿胶	423	2003	0.25137	0.0406853	0.0342361	C27	医药制造业	山东省	聊城市
000423	东阿阿胶	423	2004	0.0598106	0.0716239	0.0429325	C27	医药制造业	山东省	聊城市
000423	东阿阿胶	423	2005	0.0118593	0.0898099	0.0368247	C27	医药制造业	山东省	聊城市
000423	东阿阿胶	423	2006	0.0249157	0.181508	0.0321649	C27	医药制造业	山东省	聊城市
000423	东阿阿胶	423	2007	0.0208299	0.38752	0.0500015	C27	医药制造业	山东省	聊城市
000423	东阿阿胶	423	2008	0.0568348	0.129655	0.0747783	C27	医药制造业	山东省	聊城市
000423	东阿阿胶	423	2009	0.075949	0.101809	0.100973	C27	医药制造业	山东省	聊城市
000423	东阿阿胶	423	2010	0.0236374	0.0863246	0.108242	C27	医药制造业	山东省	聊城市
000423	东阿阿胶	423	2011	0.0595211	0.0786441	0.107289	C27	医药制造业	山东省	聊城市
000423	东阿阿胶	423	2012	0.0212307	0.0759742	0.0976968	C27	医药制造业	山东省	聊城市
000423	东阿阿胶	423	2013	0.0431755	0.0986887	0.155252	C27	医药制造业	山东省	聊城市
000423	东阿阿胶	423	2014	0.29812	0.0591828	0.125016	C27	医药制造业	山东省	聊城市
000423	东阿阿胶	423	2015	0.924534	0.111262	0.239359	C27	医药制造业	山东省	聊城市
000423	东阿阿胶	423	2016	0.890543	0.0862722	0.230083	C27	医药制造业	山东省	聊城市
000423	东阿阿胶	423	2017	0.854981	0.0642884	0.336333	C27	医药制造业	山东省	聊城市
000423	东阿阿胶	423	2018	0.268969	0.09473	0.188865	C27	医药制造业	山东省	聊城市
000423	东阿阿胶	423	2019	0.172055	0.0878888	-0.335851	C27	医药制造业	山东省	聊城市
000423	东阿阿胶	423	2020	0.762256	0.125633	-0.39629	C27	医药制造业	山东省	聊城市
000423	东阿阿胶	423	2021	0.5119	0.111136	-0.348933	C27	医药制造业	山东省	聊城市
000423	东阿阿胶	423	2022	0.814205	0.110447	0.10832	C27	医药制造业	山东省	聊城市
000423	东阿阿胶	423	2023	0.637492	0.0736703	0.130583	C27	医药制造业	山东省	聊城市
000425	徐工科技	425	2000	0.593116	0.155595	0.0528248	C35	专用设备制造业	江苏省	徐州市
000425	徐工科技	425	2001	0.430831	0.0931759	0.0565194	C35	专用设备制造业	江苏省	徐州市
000425	徐工科技	425	2002	0.451229	0.0319291	0.0975147	C35	专用设备制造业	江苏省	徐州市
000425	徐工科技	425	2003	0.21084	0.190723	0.223269	C35	专用设备制造业	江苏省	徐州市
000425	徐工科技	425	2004	0.0538887	0.125667	0.225659	C35	专用设备制造业	江苏省	徐州市
000425	徐工科技	425	2005	0.0123129	0.202635	0.0960663	C35	专用设备制造业	江苏省	徐州市
000425	徐工科技	425	2006	0.0258115	0.122496	-0.0910256	C35	专用设备制造业	江苏省	徐州市
000425	徐工科技	425	2007	0.0195308	0.237375	-0.0501131	C35	专用设备制造业	江苏省	徐州市
000425	徐工科技	425	2008	0.0554729	0.193881	0.0269861	C35	专用设备制造业	江苏省	徐州市
000425	徐工机械	425	2009	0.128646	0.127426	1.8115	C35	专用设备制造业	江苏省	徐州市
000425	徐工机械	425	2010	0.0523748	0.118111	2.19476	C35	专用设备制造业	江苏省	徐州市
000425	徐工机械	425	2011	0.0849287	0.0964957	2.96169	C35	专用设备制造业	江苏省	徐州市
000425	徐工机械	425	2012	0.0283179	0.103768	1.14334	C35	专用设备制造业	江苏省	徐州市
000425	徐工机械	425	2013	0.0434155	0.0950093	0.178084	C35	专用设备制造业	江苏省	徐州市
000425	徐工机械	425	2014	0.235586	0.153547	-0.966479	C35	专用设备制造业	江苏省	徐州市
000425	徐工机械	425	2015	0.924534	0.122618	-1.54746	C35	专用设备制造业	江苏省	徐州市
000425	徐工机械	425	2016	0.842604	0.119007	-1.01035	C35	专用设备制造业	江苏省	徐州市
000425	徐工机械	425	2017	0.837529	0.107662	0.582482	C35	专用设备制造业	江苏省	徐州市
000425	徐工机械	425	2018	0.313974	0.0565808	2.77522	C35	专用设备制造业	江苏省	徐州市
000425	徐工机械	425	2019	0.206181	0.0945977	4.22848	C35	专用设备制造业	江苏省	徐州市
000425	徐工机械	425	2020	0.8476	0.0590054	4.4837	C35	专用设备制造业	江苏省	徐州市
000425	徐工机械	425	2021	0.539114	0.116802	3.99176	C35	专用设备制造业	江苏省	徐州市
000425	徐工机械	425	2022	0.844073	0.0681242	3.46411	C35	专用设备制造业	江苏省	徐州市
000425	徐工机械	425	2023	0.626989	0.115569	1.88801	C35	专用设备制造业	江苏省	徐州市
000426	富龙热力	426	2000	0.627728	0.0764397	0.00542685	D44	电力、热力生产和供应业	内蒙古自治区	赤峰市
000426	富龙热力	426	2001	0.418061	0.063048	0.00322493	D44	电力、热力生产和供应业	内蒙古自治区	赤峰市
000426	富龙热力	426	2002	0.375055	0.0822619	0.0090082	D44	电力、热力生产和供应业	内蒙古自治区	赤峰市
000426	大地基础	426	2003	0.232685	0.0694718	0.0110738	D44	电力、热力生产和供应业	内蒙古自治区	赤峰市
000426	大地基础	426	2004	0.0590582	0.0703	0.0108271	D44	电力、热力生产和供应业	内蒙古自治区	赤峰市
000426	G 大地	426	2005	0.0114537	0.0971963	0.0141462	D44	电力、热力生产和供应业	内蒙古自治区	赤峰市
000426	大地基础	426	2006	0.0273362	0.12686	0.0211563	D44	电力、热力生产和供应业	内蒙古自治区	赤峰市
000426	富龙热电	426	2007	0.0206923	0.24379	0.0235365	D44	电力、热力生产和供应业	内蒙古自治区	赤峰市
000426	富龙热电	426	2008	0.0544727	0.244743	-0.00544314	D44	电力、热力生产和供应业	内蒙古自治区	赤峰市
000426	富龙热电	426	2009	0.0721673	0.149	-0.0170839	D44	电力、热力生产和供应业	内蒙古自治区	赤峰市
000426	富龙热电	426	2010	0.0218573	0.129152	-0.0144468	D44	电力、热力生产和供应业	内蒙古自治区	赤峰市
000426	兴业矿业	426	2011	0.058018	0.196664	0.00571382	B09	有色金属矿采选业	内蒙古自治区	赤峰市
000426	兴业矿业	426	2012	0.0208872	0.161065	0.0560309	B09	有色金属矿采选业	内蒙古自治区	赤峰市
000426	兴业矿业	426	2013	0.0420609	0.0991272	0.0429099	B09	有色金属矿采选业	内蒙古自治区	赤峰市
000426	兴业矿业	426	2014	0.278976	0.102828	0.077743	B09	有色金属矿采选业	内蒙古自治区	赤峰市
000426	兴业矿业	426	2015	0.905976	0.279105	-0.00547897	B09	有色金属矿采选业	内蒙古自治区	赤峰市
000426	兴业矿业	426	2016	0.800664	0.148898	0.00388051	B09	有色金属矿采选业	内蒙古自治区	赤峰市
000426	兴业矿业	426	2017	0.840943	0.0950185	0.0952052	B09	有色金属矿采选业	内蒙古自治区	赤峰市
000426	兴业矿业	426	2018	0.260759	0.107061	0.160929	B09	有色金属矿采选业	内蒙古自治区	赤峰市
000426	兴业矿业	426	2019	0.166452	0.122463	0.000795173	B09	有色金属矿采选业	内蒙古自治区	赤峰市
000426	兴业矿业	426	2020	0.74393	0.142667	-0.117123	B09	有色金属矿采选业	内蒙古自治区	赤峰市
000426	兴业矿业	426	2021	0.497133	0.172152	-0.0430196	B09	有色金属矿采选业	内蒙古自治区	赤峰市
000426	兴业矿业	426	2022	0.823693	0.0933759	0.121223	B09	有色金属矿采选业	内蒙古自治区	赤峰市
000426	兴业银锡	426	2023	0.643941	0.0578766	0.276579	B09	有色金属矿采选业	内蒙古自治区	赤峰市
000428	华天酒店	428	2000	0.60106	0.113572	-0.00115547	H61	住宿业	湖南省	长沙市
000428	华天酒店	428	2001	0.41506	0.0761415	0.00659957	H61	住宿业	湖南省	长沙市
000428	华天酒店	428	2002	0.343352	0.115165	0.0184898	H61	住宿业	湖南省	长沙市
000428	华天酒店	428	2003	0.222212	0.0937052	0.0202162	H61	住宿业	湖南省	长沙市
000428	华天酒店	428	2004	0.0496172	0.115209	0.0235182	H61	住宿业	湖南省	长沙市
000428	华天酒店	428	2005	0.0114537	0.114249	0.0133103	H61	住宿业	湖南省	长沙市
000428	华天酒店	428	2006	0.0214897	0.247498	0.0128671	H61	住宿业	湖南省	长沙市
000428	华天酒店	428	2007	0.0206722	0.185982	0.0151036	H61	住宿业	湖南省	长沙市
000428	华天酒店	428	2008	0.0558817	0.178384	0.0440632	H61	住宿业	湖南省	长沙市
000428	华天酒店	428	2009	0.0749237	0.174356	0.0746925	H61	住宿业	湖南省	长沙市
000428	华天酒店	428	2010	0.0231689	0.0991783	0.076184	H61	住宿业	湖南省	长沙市
000428	华天酒店	428	2011	0.0592332	0.0632647	0.0663655	H61	住宿业	湖南省	长沙市
000428	华天酒店	428	2012	0.0208105	0.0910869	0.0374568	H61	住宿业	湖南省	长沙市
000428	华天酒店	428	2013	0.0415769	0.221883	0.0407328	H61	住宿业	湖南省	长沙市
000428	华天酒店	428	2014	0.255319	0.15551	-0.00506498	H61	住宿业	湖南省	长沙市
000428	华天酒店	428	2015	0.921018	0.170599	-0.0450532	H61	住宿业	湖南省	长沙市
000428	华天酒店	428	2016	0.825919	0.131214	-0.0777215	H61	住宿业	湖南省	长沙市
000428	华天酒店	428	2017	0.850129	0.0720867	-0.045128	H61	住宿业	湖南省	长沙市
000428	华天酒店	428	2018	0.280023	0.0751037	-0.0236465	H61	住宿业	湖南省	长沙市
000428	华天酒店	428	2019	0.175884	0.083202	0.0106776	H61	住宿业	湖南省	长沙市
000428	华天酒店	428	2020	0.778172	0.112039	-0.0547716	H61	住宿业	湖南省	长沙市
000428	华天酒店	428	2021	0.503583	0.148878	-0.036398	H61	住宿业	湖南省	长沙市
000428	华天酒店	428	2022	0.767174	0.194695	-0.0636965	H61	住宿业	湖南省	长沙市
[truncated: 43,994 more rows]

## Sheet: Sheet1
股票代码	组织韧性	股票代码	组织韧性
2	0.649385	4	0.400689
2	0.512539	4	0.400689
2	0.431633	4	0.400689
2	0.265758	4	0.400689
2	0.0647803	4	0.400689
2	0.0234528	4	0.400689
2	0.0433179	4	0.400689
2	0.0647303	4	0.400689
2	0.0998803	4	0.400689
2	0.168442	8	0.451475
2	0.0430411	8	0.451475
2	0.0861024	8	0.451475
2	0.0574319	8	0.451475
2	0.125568	8	0.451475
2	0.425804	8	0.451475
2	0.924534	8	0.451475
2	0.645548	8	0.451475
2	0.888296	8	0.451475
2	0.345408	10	0.393231
2	0.276302	10	0.393231
2	0.865524	16	0.704428
2	0.620056	16	0.704428
2	0.814782	16	0.704428
2	0.656604	16	0.704428
4	0.400689	16	0.704428
4	0.387377	16	0.704428
4	0.212714	16	0.704428
4	0.0366393	16	0.704428
4	0.0114537	16	0.704428
4	0.0584669	16	0.704428
4	0.0205795	16	0.704428
4	0.0415573	16	0.704428
4	0.258308	16	0.704428
4	0.920068	17	0.237733
4	0.699666	17	0.237733
4	0.832731	17	0.237733
4	0.280207	17	0.237733
4	0.164013	17	0.237733
4	0.603918	17	0.237733
4	0.515743	17	0.237733
4	0.624529	17	0.237733
5	0.601085	17	0.237733
5	0.409368	20	0.547151
5	0.301876	20	0.547151
5	0.0557426	20	0.547151
5	0.0717776	20	0.547151
5	0.0218675	20	0.547151
5	0.0582605	20	0.547151
5	0.0205841	20	0.547151
5	0.0415873	20	0.547151
5	0.253387	20	0.547151
5	0.796495	20	0.547151
5	0.862295	20	0.547151
5	0.862042	20	0.547151
5	0.285317	20	0.547151
5	0.174061	21	0.704094
5	0.841277	21	0.704094
6	0.640436	21	0.704094
6	0.439323	21	0.704094
6	0.338851	21	0.704094
6	0.226611	21	0.704094
6	0.0448777	21	0.704094
6	0.0114537	21	0.704094
6	0.0234593	21	0.704094
6	0.0190458	21	0.704094
6	0.0546637	21	0.704094
6	0.0744704	21	0.704094
6	0.0236406	21	0.704094
6	0.059988	30	0.0467758
6	0.0213738	30	0.0467758
6	0.0437983	30	0.0467758
6	0.277938	30	0.0467758
6	0.917643	30	0.0467758
6	0.826287	30	0.0467758
6	0.849916	30	0.0467758
6	0.267294	30	0.0467758
6	0.176489	30	0.0467758
6	0.706603	30	0.0467758
6	0.526705	30	0.0467758
6	0.765736	32	0.646897
6	0.632967	32	0.646897
7	0.591547	32	0.646897
7	0.347831	32	0.646897
7	0.226182	45	0.640271
7	0.037512	45	0.640271
7	0.0114537	45	0.640271
7	0.0265813	45	0.640271
7	0.0206232	45	0.640271
7	0.0415907	45	0.640271
7	0.251459	45	0.640271
7	0.910083	45	0.640271
7	0.763734	45	0.640271
7	0.850183	49	0.606167
7	0.24689	49	0.606167
7	0.147762	49	0.606167
7	0.801262	49	0.606167
7	0.850232	49	0.606167
8	0.451475	49	0.606167
8	0.37912	49	0.606167
8	0.0114537	49	0.606167
8	0.0274368	49	0.606167
8	0.0418977	49	0.606167
8	0.19397	49	0.606167
8	0.910002	49	0.606167
8	0.756152	49	0.606167
8	0.852164	50	0.629921
8	0.269594	50	0.629921
8	0.173146	50	0.629921
8	0.857564	50	0.629921
8	0.513138	50	0.629921
8	0.812201	50	0.629921
8	0.649091	50	0.629921
9	0.590766	50	0.629921
9	0.421092	50	0.629921
9	0.26318	50	0.629921
9	0.242044	50	0.629921
9	0.0558143	50	0.629921
9	0.0130744	50	0.629921
9	0.0309681	63	0.783337
9	0.021052	63	0.783337
9	0.0564945	63	0.783337
9	0.0749651	63	0.783337
9	0.0238184	63	0.783337
9	0.0592309	63	0.783337
9	0.0210471	63	0.783337
9	0.0424992	63	0.783337
9	0.24501	63	0.783337
9	0.911953	63	0.783337
9	0.81528	63	0.783337
9	0.84224	63	0.783337
9	0.274966	63	0.783337
9	0.161391	66	0.644953
9	0.773455	66	0.644953
9	0.464052	66	0.644953
9	0.788601	66	0.644953
9	0.642998	66	0.644953
10	0.393231	66	0.644953
10	0.317652	66	0.644953
10	0.219843	66	0.644953
10	0.0423205	66	0.644953
10	0.0114537	66	0.644953
10	0.0417098	66	0.644953
10	0.274411	66	0.644953
10	0.868163	66	0.644953
10	0.90521	68	0.62402
10	0.841868	68	0.62402
10	0.240534	68	0.62402
10	0.795546	68	0.62402
10	0.530426	68	0.62402
10	0.804872	68	0.62402
10	0.604739	70	0.213009
11	0.611235	70	0.213009
11	0.0114537	70	0.213009
11	0.0285763	70	0.213009
11	0.0189273	70	0.213009
11	0.0742501	70	0.213009
11	0.0229329	70	0.213009
11	0.0590274	70	0.213009
11	0.0211937	70	0.213009
11	0.0422245	70	0.213009
11	0.284912	70	0.213009
11	0.913762	70	0.213009
11	0.791654	70	0.213009
11	0.851751	78	0.444462
11	0.269694	100	0.0568937
11	0.17854	100	0.0568937
11	0.568239	100	0.0568937
11	0.516367	100	0.0568937
11	0.811454	100	0.0568937
11	0.635328	100	0.0568937
12	0.365911	100	0.0568937
12	0.421874	100	0.0568937
12	0.30409	100	0.0568937
12	0.210603	100	0.0568937
12	0.0546664	100	0.0568937
12	0.0133912	100	0.0568937
12	0.0226824	100	0.0568937
12	0.0241863	153	0.237673
12	0.0578528	153	0.237673
12	0.0796406	153	0.237673
12	0.0268947	153	0.237673
12	0.0620445	153	0.237673
12	0.0217085	153	0.237673
12	0.0413719	153	0.237673
12	0.297464	153	0.237673
12	0.918983	153	0.237673
12	0.838306	153	0.237673
12	0.853762	153	0.237673
12	0.291606	153	0.237673
12	0.175771	153	0.237673
12	0.791048	155	0.241952
12	0.502562	155	0.241952
12	0.808327	155	0.241952
12	0.650317	155	0.241952
13	0.536598	155	0.241952
13	0.289762	157	0.250439
14	0.353567	157	0.250439
14	0.230771	157	0.250439
14	0.0477262	157	0.250439
14	0.0114537	157	0.250439
14	0.0289511	157	0.250439
14	0.0199243	157	0.250439
14	0.0543391	157	0.250439
14	0.0737035	157	0.250439
14	0.0227805	157	0.250439
14	0.058633	157	0.250439
14	0.0202641	157	0.250439
14	0.0413957	157	0.250439
14	0.27514	301	0.238777
14	0.916522	301	0.238777
14	0.864297	301	0.238777
14	0.845667	301	0.238777
14	0.227802	301	0.238777
14	0.174045	301	0.238777
14	0.75425	333	0.8654
14	0.52668	333	0.8654
14	0.776971	333	0.8654
14	0.621527	333	0.8654
16	0.704428	333	0.8654
16	0.328508	333	0.8654
16	0.259692	333	0.8654
16	0.290289	333	0.8654
16	0.079147	333	0.8654
16	0.018256	333	0.8654
16	0.0288863	333	0.8654
16	0.0186008	338	0.0689153
16	0.0563552	338	0.0689153
16	0.0745488	338	0.0689153
16	0.0289189	338	0.0689153
16	0.0621752	338	0.0689153
16	0.0239963	338	0.0689153
16	0.0445468	338	0.0689153
16	0.290602	338	0.0689153
16	0.896204	338	0.0689153
16	0.817346	338	0.0689153
16	0.86293	338	0.0689153
16	0.277757	338	0.0689153
16	0.189381	338	0.0689153
16	0.602742	400	0.634315
16	0.513375	400	0.634315
16	0.804632	400	0.634315
16	0.638113	400	0.634315
17	0.237733	400	0.634315
17	0.900595	400	0.634315
17	0.862434	400	0.634315
17	0.844042	400	0.634315
17	0.253597	400	0.634315
17	0.161516	400	0.634315
17	0.516338	400	0.634315
17	0.797916	400	0.634315
17	0.64709	400	0.634315
18	0.598491	403	0.592076
18	0.410077	403	0.592076
18	0.344344	403	0.592076
18	0.235973	403	0.592076
18	0.0476897	403	0.592076
18	0.0114537	403	0.592076
18	0.0271101	404	0.601549
18	0.232027	404	0.601549
18	0.906134	404	0.601549
18	0.812527	404	0.601549
18	0.850958	404	0.601549
18	0.225539	404	0.601549
19	0.542053	404	0.601549
19	0.407807	404	0.601549
19	0.294268	404	0.601549
19	0.21962	404	0.601549
19	0.050281	404	0.601549
19	0.0114537	404	0.601549
19	0.0287839	404	0.601549
19	0.0203328	407	0.603398
19	0.0549808	407	0.603398
19	0.0730264	407	0.603398
19	0.0220923	407	0.603398
19	0.0585781	408	0.612264
19	0.0205936	408	0.612264
19	0.0418439	408	0.612264
19	0.27887	408	0.612264
19	0.905157	408	0.612264
19	0.731859	408	0.612264
19	0.827854	410	0.625872
19	0.281063	410	0.625872
19	0.187295	410	0.625872
19	0.764232	410	0.625872
19	0.522746	410	0.625872
19	0.805082	410	0.625872
19	0.641912	410	0.625872
20	0.547151	410	0.625872
20	0.405988	413	0.607122
20	0.386224	413	0.607122
20	0.209294	413	0.607122
20	0.0735219	413	0.607122
20	0.0227855	413	0.607122
20	0.0591532	413	0.607122
20	0.0206831	413	0.607122
20	0.0415505	413	0.607122
20	0.283845	413	0.607122
20	0.872188	413	0.607122
20	0.803755	413	0.607122
20	0.82628	413	0.607122
20	0.238625	420	0.639797
20	0.176848	420	0.639797
20	0.794902	420	0.639797
20	0.526933	420	0.639797
20	0.81343	420	0.639797
20	0.64199	420	0.639797
21	0.704094	420	0.639797
21	0.463916	420	0.639797
21	0.414561	420	0.639797
21	0.256013	420	0.639797
21	0.0643864	420	0.639797
21	0.0149819	420	0.639797
21	0.0327501	422	0.645504
21	0.0303287	422	0.645504
21	0.0639961	422	0.645504
21	0.0823306	422	0.645504
21	0.0327273	422	0.645504
21	0.0626786	422	0.645504
21	0.0225914	422	0.645504
21	0.0357422	422	0.645504
21	0.267589	422	0.645504
21	0.91367	422	0.645504
21	0.792351	423	0.640671
21	0.853623	423	0.640671
21	0.274751	423	0.640671
21	0.154864	423	0.640671
21	0.76588	423	0.640671
21	0.523493	423	0.640671
21	0.816851	423	0.640671
21	0.611503	423	0.640671
22	0.622278	423	0.640671
22	0.418814	423	0.640671
22	0.340747	423	0.640671
22	0.247468	423	0.640671
22	0.0588596	423	0.640671
22	0.0131433	425	0.593116
22	0.0303739	425	0.593116
22	0.0213128	425	0.593116
22	0.0559555	425	0.593116
22	0.0715126	425	0.593116
22	0.0217794	425	0.593116
22	0.0582864	425	0.593116
22	0.0207843	425	0.593116
22	0.0412537	425	0.593116
22	0.282016	425	0.593116
22	0.924231	425	0.593116
22	0.798886	425	0.593116
22	0.840447	425	0.593116
23	0.43065	510	0.616251
23	0.397222	510	0.616251
23	0.344389	510	0.616251
23	0.225729	510	0.616251
23	0.0496526	510	0.616251
23	0.0114537	510	0.616251
23	0.028329	510	0.616251
23	0.0205476	510	0.616251
23	0.055707	510	0.616251
23	0.0731419	510	0.616251
23	0.0224425	510	0.616251
23	0.0587775	510	0.616251
23	0.0206178	513	0.621973
23	0.0419091	513	0.621973
23	0.269737	513	0.621973
23	0.916185	513	0.621973
23	0.867274	513	0.621973
23	0.843106	513	0.621973
23	0.257242	513	0.621973
23	0.150784	513	0.621973
23	0.779748	513	0.621973
23	0.529641	513	0.621973
23	0.801257	513	0.621973
24	0.653871	513	0.621973
24	0.532737	513	0.621973
24	0.416604	518	0.441368
24	0.269301	518	0.441368
24	0.0539552	518	0.441368
24	0.0114537	518	0.441368
24	0.0226295	518	0.441368
24	0.0213008	518	0.441368
24	0.0574047	518	0.441368
24	0.0948716	518	0.441368
24	0.0353585	518	0.441368
24	0.0688815	518	0.441368
24	0.0308491	518	0.441368
24	0.0602265	518	0.441368
24	0.29463	518	0.441368
25	0.0114537	519	0.536148
25	0.0225582	519	0.536148
25	0.0200283	519	0.536148
25	0.0548246	519	0.536148
25	0.0704933	519	0.536148
25	0.0212558	519	0.536148
25	0.0581024	519	0.536148
25	0.0205487	519	0.536148
25	0.0418071	519	0.536148
25	0.262859	521	0.60698
25	0.893935	521	0.60698
25	0.81413	521	0.60698
25	0.80881	521	0.60698
25	0.278707	521	0.60698
25	0.175427	521	0.60698
25	0.825541	521	0.60698
25	0.533742	521	0.60698
25	0.719652	521	0.60698
25	0.638738	521	0.60698
26	0.581186	521	0.60698
26	0.410249	521	0.60698
26	0.406418	521	0.60698
26	0.234117	523	0.617947
26	0.0478613	523	0.617947
26	0.0114537	523	0.617947
26	0.0274739	523	0.617947
26	0.0212734	523	0.617947
26	0.0565769	523	0.617947
26	0.0751077	523	0.617947
26	0.0234755	523	0.617947
26	0.0596287	523	0.617947
26	0.0217305	523	0.617947
26	0.0428761	523	0.617947
26	0.279371	525	0.598178
26	0.914913	525	0.598178
26	0.803453	525	0.598178
26	0.856222	525	0.598178
26	0.288636	525	0.598178
26	0.170263	525	0.598178
26	0.517958	525	0.598178
26	0.518102	525	0.598178
26	0.824157	525	0.598178
26	0.637943	525	0.598178
27	0.640268	528	0.609059
27	0.498548	528	0.609059
27	0.415896	528	0.609059
27	0.270038	528	0.609059
27	0.06551	528	0.609059
27	0.0174099	528	0.609059
27	0.0330544	528	0.609059
27	0.0277343	528	0.609059
27	0.0610592	528	0.609059
27	0.0864207	528	0.609059
27	0.0250585	528	0.609059
27	0.0618988	528	0.609059
27	0.0215643	528	0.609059
27	0.0416843	530	0.635317
27	0.277016	530	0.635317
27	0.924534	530	0.635317
27	0.848407	530	0.635317
27	0.872293	530	0.635317
27	0.301867	530	0.635317
27	0.185686	530	0.635317
27	0.816805	530	0.635317
27	0.462448	530	0.635317
27	0.833786	530	0.635317
27	0.655268	530	0.635317
28	0.538866	530	0.635317
28	0.470722	530	0.635317
28	0.443456	533	0.619007
28	0.248503	533	0.619007
28	0.045329	533	0.619007
28	0.0114537	533	0.619007
28	0.0346264	533	0.619007
28	0.0288078	533	0.619007
28	0.0650701	533	0.619007
28	0.0891359	533	0.619007
28	0.0306488	533	0.619007
28	0.0645341	533	0.619007
28	0.0253214	533	0.619007
28	0.0496671	533	0.619007
28	0.296998	533	0.619007
28	0.924534	534	0.599558
28	0.924534	534	0.599558
28	0.862984	534	0.599558
28	0.311764	534	0.599558
28	0.181332	534	0.599558
28	0.801123	536	0.0715574
28	0.541992	536	0.0715574
28	0.839399	536	0.0715574
28	0.604145	536	0.0715574
29	0.508867	536	0.0715574
29	0.407809	536	0.0715574
29	0.192229	536	0.0715574
29	0.210259	536	0.0715574
29	0.0445137	536	0.0715574
29	0.0114537	536	0.0715574
29	0.0270726	536	0.0715574
29	0.0208882	536	0.0715574
29	0.0552537	538	0.656927
29	0.071632	538	0.656927
29	0.0222887	538	0.656927
29	0.0589234	538	0.656927
29	0.0207294	538	0.656927
29	0.042756	538	0.656927
29	0.270647	538	0.656927
29	0.905625	538	0.656927
29	0.801461	538	0.656927
29	0.848691	538	0.656927
29	0.52426	538	0.656927
29	0.79338	538	0.656927
29	0.640531	538	0.656927
30	0.0467758	541	0.643625
30	0.291769	541	0.643625
30	0.837068	541	0.643625
30	0.861654	541	0.643625
30	0.294493	541	0.643625
30	0.181153	541	0.643625
30	0.756305	541	0.643625
30	0.504368	541	0.643625
30	0.810943	541	0.643625
30	0.636557	541	0.643625
31	0.564011	541	0.643625
31	0.399346	541	0.643625
31	0.328716	541	0.643625
31	0.210757	545	0.612253
31	0.0447366	545	0.612253
31	0.0114537	545	0.612253
31	0.0252062	545	0.612253
31	0.020988	545	0.612253
31	0.0563512	545	0.612253
31	0.0777098	545	0.612253
31	0.0238863	545	0.612253
31	0.0626014	545	0.612253
31	0.0245724	545	0.612253
31	0.0496202	545	0.612253
31	0.240804	547	0.60033
31	0.911424	547	0.60033
31	0.858837	547	0.60033
31	0.844489	547	0.60033
31	0.27674	547	0.60033
31	0.184851	547	0.60033
31	0.821314	547	0.60033
31	0.541726	547	0.60033
31	0.804091	547	0.60033
31	0.63357	547	0.60033
32	0.646897	547	0.60033
32	0.466528	547	0.60033
32	0.397519	547	0.60033
32	0.220986	550	0.462279
32	0.0454857	550	0.462279
32	0.0114537	550	0.462279
32	0.0306618	550	0.462279
32	0.0210555	550	0.462279
32	0.0554299	550	0.462279
32	0.0713552	550	0.462279
32	0.0215286	550	0.462279
32	0.0586177	550	0.462279
32	0.0207228	550	0.462279
32	0.0416199	550	0.462279
32	0.242047	550	0.462279
32	0.914047	550	0.462279
32	0.839237	553	0.620414
32	0.84394	553	0.620414
32	0.251539	553	0.620414
32	0.173875	553	0.620414
32	0.676368	553	0.620414
32	0.532771	553	0.620414
32	0.73689	553	0.620414
32	0.621605	553	0.620414
33	0.542571	553	0.620414
33	0.389617	553	0.620414
33	0.326891	553	0.620414
33	0.216998	553	0.620414
33	0.047019	553	0.620414
33	0.0114537	559	0.645511
33	0.0266732	559	0.645511
33	0.0202875	559	0.645511
33	0.0554801	559	0.645511
33	0.072651	559	0.645511
33	0.0221432	559	0.645511
33	0.0583314	559	0.645511
33	0.0205608	559	0.645511
33	0.0416463	559	0.645511
34	0.335381	559	0.645511
34	0.216557	559	0.645511
34	0.0348984	559	0.645511
34	0.058506	559	0.645511
34	0.0205934	561	0.56473
34	0.041908	561	0.56473
34	0.271652	561	0.56473
34	0.920817	561	0.56473
34	0.76194	561	0.56473
34	0.83112	561	0.56473
34	0.332207	561	0.56473
34	0.197879	561	0.56473
34	0.808918	561	0.56473
34	0.541505	561	0.56473
34	0.757771	561	0.56473
34	0.624645	561	0.56473
35	0.557872	561	0.56473
35	0.426609	565	0.581789
35	0.437667	565	0.581789
35	0.254036	565	0.581789
35	0.0392775	565	0.581789
35	0.294736	565	0.581789
35	0.918598	565	0.581789
35	0.833411	565	0.581789
35	0.858348	565	0.581789
35	0.218661	565	0.581789
35	0.17529	565	0.581789
35	0.827321	565	0.581789
35	0.525697	565	0.581789
35	0.77858	565	0.581789
35	0.627234	566	0.596865
36	0.632729	566	0.596865
36	0.527073	566	0.596865
36	0.405457	566	0.596865
36	0.231211	566	0.596865
36	0.0465898	566	0.596865
36	0.0114537	566	0.596865
36	0.0296054	566	0.596865
36	0.0320076	566	0.596865
36	0.0521928	566	0.596865
36	0.0122698	566	0.596865
36	0.0589458	566	0.596865
36	0.0194137	566	0.596865
36	0.0407367	570	0.580903
36	0.277887	570	0.580903
36	0.920856	570	0.580903
36	0.866878	570	0.580903
36	0.811844	570	0.580903
36	0.246862	570	0.580903
36	0.175865	570	0.580903
36	0.799734	570	0.580903
36	0.514019	570	0.580903
36	0.816749	570	0.580903
36	0.639237	570	0.580903
37	0.627343	570	0.580903
37	0.415765	570	0.580903
37	0.4017	571	0.57364
37	0.245671	572	0.589232
37	0.0609861	572	0.589232
37	0.0138412	572	0.589232
37	0.032318	572	0.589232
37	0.0222832	572	0.589232
37	0.0555856	572	0.589232
37	0.0665647	572	0.589232
37	0.0192583	572	0.589232
37	0.0577131	572	0.589232
37	0.020152	572	0.589232
37	0.0412042	572	0.589232
37	0.274439	576	0.622427
37	0.911837	576	0.622427
37	0.847526	576	0.622427
37	0.261946	576	0.622427
37	0.123996	581	0.427252
37	0.690933	581	0.427252
37	0.501424	581	0.427252
37	0.769159	581	0.427252
37	0.597345	581	0.427252
38	0.391716	581	0.427252
38	0.378108	581	0.427252
38	0.228866	581	0.427252
38	0.0422954	581	0.427252
38	0.0114537	581	0.427252
38	0.023756	581	0.427252
38	0.0412155	581	0.427252
38	0.286892	581	0.427252
38	0.924348	584	0.59286
38	0.838153	584	0.59286
38	0.843003	584	0.59286
38	0.250039	584	0.59286
38	0.119698	584	0.59286
38	0.728892	584	0.59286
38	0.52187	584	0.59286
39	0.755646	584	0.59286
39	0.489418	584	0.59286
39	0.495815	584	0.59286
39	0.307385	584	0.59286
39	0.114185	584	0.59286
39	0.0563963	586	0.620984
39	0.0564657	586	0.620984
39	0.0558836	586	0.620984
39	0.0795779	586	0.620984
39	0.0336196	586	0.620984
39	0.026267	586	0.620984
39	0.0734025	586	0.620984
39	0.0435458	586	0.620984
39	0.0476032	586	0.620984
39	0.294737	586	0.620984
39	0.924534	586	0.620984
39	0.835126	586	0.620984
39	0.854424	590	0.517473
39	0.310644	590	0.517473
39	0.202442	590	0.517473
39	0.759104	590	0.517473
39	0.565944	590	0.517473
39	0.842572	590	0.517473
39	0.648331	590	0.517473
40	0.580847	590	0.517473
40	0.40913	590	0.517473
40	0.293277	590	0.517473
40	0.0115896	590	0.517473
40	0.0284008	590	0.517473
40	0.0198863	595	0.561069
40	0.0548249	595	0.561069
40	0.0730124	595	0.561069
40	0.0223468	595	0.561069
40	0.0589634	595	0.561069
40	0.0206293	595	0.561069
40	0.0418249	595	0.561069
40	0.29026	595	0.561069
40	0.904259	595	0.561069
40	0.817198	597	0.653741
40	0.850303	597	0.653741
40	0.259452	597	0.653741
40	0.164537	597	0.653741
40	0.833109	597	0.653741
40	0.500389	597	0.653741
40	0.81038	597	0.653741
40	0.633299	597	0.653741
42	0.635447	597	0.653741
42	0.439422	597	0.653741
42	0.342435	597	0.653741
42	0.23202	597	0.653741
42	0.0618585	597	0.653741
42	0.0114537	605	0.533344
42	0.0245656	607	0.629899
42	0.0165945	607	0.629899
42	0.0552107	607	0.629899
42	0.0761286	615	0.650894
42	0.0225014	615	0.650894
42	0.0590786	615	0.650894
42	0.0210071	615	0.650894
42	0.0424232	615	0.650894
42	0.290961	617	0.57702
42	0.922804	617	0.57702
42	0.85315	617	0.57702
42	0.863478	617	0.57702
42	0.264709	622	0.584347
42	0.17815	622	0.584347
42	0.858468	622	0.584347
42	0.523882	622	0.584347
42	0.80274	622	0.584347
42	0.633104	622	0.584347
43	0.631978	622	0.584347
43	0.40441	622	0.584347
43	0.330419	622	0.584347
43	0.220386	622	0.584347
43	0.0483001	623	0.634461
43	0.0114537	623	0.634461
43	0.0294261	623	0.634461
43	0.0226957	623	0.634461
43	0.0561113	623	0.634461
43	0.0737131	623	0.634461
43	0.0243472	623	0.634461
43	0.060248	623	0.634461
43	0.0221391	623	0.634461
43	0.0438608	623	0.634461
43	0.223973	623	0.634461
43	0.917102	623	0.634461
43	0.754048	623	0.634461
43	0.846392	625	0.736019
43	0.268125	625	0.736019
45	0.640271	625	0.736019
45	0.421725	625	0.736019
45	0.364331	625	0.736019
45	0.227776	625	0.736019
45	0.0331645	625	0.736019
45	0.0114537	625	0.736019
45	0.026626	625	0.736019
45	0.0204681	625	0.736019
45	0.0554072	625	0.736019
45	0.0724146	625	0.736019
45	0.0223463	625	0.736019
45	0.0587751	627	0.615578
45	0.0207687	627	0.615578
45	0.0419275	627	0.615578
45	0.251819	627	0.615578
45	0.917307	627	0.615578
45	0.775455	633	0.640143
45	0.844573	633	0.640143
45	0.275423	633	0.640143
45	0.170692	633	0.640143
45	0.779019	633	0.640143
45	0.52667	633	0.640143
45	0.778927	635	0.548601
45	0.642293	635	0.548601
46	0.632877	635	0.548601
46	0.414511	635	0.548601
46	0.345128	635	0.548601
46	0.22273	635	0.548601
46	0.0577374	635	0.548601
46	0.0114537	635	0.548601
46	0.0260175	635	0.548601
46	0.0253146	635	0.548601
46	0.0560013	635	0.548601
46	0.0757452	635	0.548601
46	0.0185167	635	0.548601
46	0.0590482	636	0.612972
46	0.0219009	636	0.612972
46	0.0458908	636	0.612972
46	0.260308	636	0.612972
46	0.922021	636	0.612972
46	0.893166	636	0.612972
46	0.871152	636	0.612972
46	0.259359	636	0.612972
46	0.150281	636	0.612972
47	0.611577	636	0.612972
48	0.528057	636	0.612972
48	0.0114537	636	0.612972
48	0.0291733	636	0.612972
48	0.020572	650	0.60366
48	0.0418753	650	0.60366
48	0.28788	650	0.60366
48	0.920104	650	0.60366
48	0.923227	650	0.60366
48	0.173846	650	0.60366
48	0.655024	650	0.60366
48	0.528141	650	0.60366
48	0.8223	650	0.60366
48	0.635518	650	0.60366
49	0.606167	650	0.60366
49	0.377533	650	0.60366
49	0.316524	650	0.60366
49	0.0124091	651	0.737359
49	0.0300498	651	0.737359
49	0.021395	651	0.737359
49	0.0550706	651	0.737359
49	0.0727669	651	0.737359
49	0.0226193	651	0.737359
49	0.0596744	651	0.737359
49	0.0220494	651	0.737359
49	0.0446216	651	0.737359
49	0.293849	651	0.737359
49	0.919047	651	0.737359
49	0.829215	651	0.737359
49	0.844588	651	0.737359
49	0.291251	661	0.624779
49	0.17113	661	0.624779
49	0.734519	661	0.624779
49	0.508982	661	0.624779
49	0.784907	661	0.624779
49	0.641017	661	0.624779
50	0.629921	661	0.624779
50	0.412867	661	0.624779
50	0.378142	661	0.624779
50	0.224372	661	0.624779
50	0.0333943	661	0.624779
50	0.0125911	661	0.624779
50	0.0267304	661	0.624779
50	0.0215414	663	0.642583
50	0.055322	663	0.642583
50	0.0748304	663	0.642583
50	0.0244481	663	0.642583
50	0.0613041	663	0.642583
50	0.0219137	663	0.642583
50	0.0422278	663	0.642583
50	0.237106	669	0.59049
50	0.920516	670	0.62196
50	0.782464	670	0.62196
50	0.829645	670	0.62196
50	0.290993	670	0.62196
50	0.160163	670	0.62196
50	0.809708	670	0.62196
50	0.532679	676	0.543283
50	0.840206	676	0.543283
50	0.640708	676	0.543283
55	0.616024	677	0.651463
55	0.403648	677	0.651463
55	0.34423	677	0.651463
55	0.215186	677	0.651463
55	0.0323948	677	0.651463
55	0.0114537	677	0.651463
55	0.0258584	677	0.651463
55	0.0205026	677	0.651463
55	0.0548165	677	0.651463
55	0.0733329	677	0.651463
55	0.0228005	678	0.605757
55	0.0590164	678	0.605757
55	0.0208743	678	0.605757
55	0.0423185	678	0.605757
55	0.286954	678	0.605757
55	0.910543	678	0.605757
55	0.747374	678	0.605757
55	0.846903	678	0.605757
55	0.225083	678	0.605757
55	0.163859	678	0.605757
55	0.835518	678	0.605757
55	0.530861	678	0.605757
55	0.822851	678	0.605757
55	0.647653	680	0.587584
56	0.617461	680	0.587584
56	0.414655	680	0.587584
56	0.310085	680	0.587584
56	0.208367	680	0.587584
56	0.0420016	680	0.587584
56	0.0114537	680	0.587584
56	0.027591	680	0.587584
56	0.0201286	680	0.587584
56	0.0545824	680	0.587584
56	0.0726157	680	0.587584
56	0.0220489	680	0.587584
56	0.0579433	680	0.587584
56	0.267449	682	0.518882
56	0.919711	682	0.518882
56	0.818015	682	0.518882
56	0.861294	682	0.518882
56	0.197124	682	0.518882
56	0.155584	682	0.518882
56	0.810711	682	0.518882
56	0.484627	683	0.628243
56	0.768839	683	0.628243
56	0.608619	683	0.628243
58	0.577401	683	0.628243
58	0.416137	683	0.628243
58	0.27909	683	0.628243
58	0.222875	683	0.628243
58	0.0506044	683	0.628243
58	0.0114537	683	0.628243
58	0.0255528	683	0.628243
58	0.0174586	683	0.628243
58	0.0673899	683	0.628243
58	0.0215922	683	0.628243
58	0.0586139	691	0.567981
58	0.0206366	691	0.567981
58	0.0417626	691	0.567981
58	0.292257	691	0.567981
58	0.907143	697	0.606844
58	0.855166	697	0.606844
58	0.844075	697	0.606844
58	0.248456	697	0.606844
58	0.123082	697	0.606844
58	0.739377	698	0.675539
58	0.522612	700	0.625013
58	0.802045	700	0.625013
58	0.639545	700	0.625013
59	0.605073	700	0.625013
59	0.401825	700	0.625013
59	0.347461	700	0.625013
59	0.23639	700	0.625013
59	0.0508518	700	0.625013
59	0.0121229	700	0.625013
59	0.0291949	700	0.625013
59	0.0230617	700	0.625013
59	0.0580982	700	0.625013
59	0.0738882	700	0.625013
59	0.0504633	703	0.630718
59	0.0884429	703	0.630718
59	0.043037	703	0.630718
59	0.059071	703	0.630718
59	0.263677	703	0.630718
59	0.78633	703	0.630718
59	0.827561	703	0.630718
59	0.279234	703	0.630718
59	0.188081	703	0.630718
59	0.806901	703	0.630718
59	0.503708	703	0.630718
59	0.808623	703	0.630718
59	0.644368	703	0.630718
60	0.683194	707	0.586015
60	0.524879	707	0.586015
60	0.307265	707	0.586015
60	0.21202	707	0.586015
60	0.0540105	707	0.586015
60	0.0142572	707	0.586015
60	0.0266959	707	0.586015
60	0.0279004	707	0.586015
60	0.0599615	707	0.586015
60	0.076537	710	0.575551
60	0.0238887	710	0.575551
60	0.0685405	710	0.575551
60	0.0279083	710	0.575551
60	0.0530054	710	0.575551
60	0.284539	710	0.575551
60	0.916782	725	0.374716
60	0.793626	725	0.374716
60	0.847119	725	0.374716
60	0.287579	725	0.374716
60	0.184175	725	0.374716
60	0.779483	725	0.374716
60	0.533386	725	0.374716
60	0.841962	725	0.374716
60	0.640909	725	0.374716
61	0.632807	725	0.374716
61	0.465261	725	0.374716
61	0.383803	725	0.374716
61	0.253992	725	0.374716
61	0.0543252	727	0.607537
61	0.0118759	727	0.607537
61	0.021121	727	0.607537
61	0.0189657	727	0.607537
61	0.0537443	727	0.607537
61	0.0714764	727	0.607537
61	0.0220742	727	0.607537
61	0.0589465	727	0.607537
61	0.0208268	727	0.607537
61	0.0422941	727	0.607537
61	0.268782	727	0.607537
61	0.922826	727	0.607537
61	0.892446	731	0.565654
61	0.860904	731	0.565654
61	0.258685	731	0.565654
61	0.178458	731	0.565654
61	0.791995	731	0.565654
61	0.519289	731	0.565654
61	0.833021	731	0.565654
61	0.638042	731	0.565654
62	0.610618	731	0.565654
62	0.393774	731	0.565654
62	0.323974	731	0.565654
62	0.217045	731	0.565654
62	0.0577115	731	0.565654
62	0.0158756	733	0.520861
62	0.0309872	733	0.520861
62	0.0207342	733	0.520861
62	0.0540672	733	0.520861
62	0.0730358	733	0.520861
62	0.0195724	733	0.520861
62	0.0575038	733	0.520861
62	0.0200813	733	0.520861
62	0.0428848	733	0.520861
62	0.286971	733	0.520861
62	0.899244	733	0.520861
62	0.772021	733	0.520861
62	0.824375	733	0.520861
62	0.282772	737	0.681367
62	0.184778	737	0.681367
62	0.798621	737	0.681367
62	0.526175	737	0.681367
62	0.825774	737	0.681367
62	0.645062	737	0.681367
63	0.783337	737	0.681367
63	0.732928	737	0.681367
63	0.595634	738	0.593723
63	0.421959	738	0.593723
63	0.0899425	738	0.593723
63	0.0329926	738	0.593723
63	0.0386364	738	0.593723
63	0.0398451	738	0.593723
63	0.0877486	738	0.593723
63	0.187746	738	0.593723
63	0.0710938	738	0.593723
63	0.0959649	738	0.593723
63	0.036791	738	0.593723
63	0.0464998	738	0.593723
63	0.288541	738	0.593723
63	0.924534	739	0.569701
63	0.88973	739	0.569701
63	0.857905	739	0.569701
63	0.171039	739	0.569701
63	0.148906	739	0.569701
63	0.763433	739	0.569701
63	0.540793	739	0.569701
63	0.835381	739	0.569701
63	0.618956	739	0.569701
65	0.422569	739	0.569701
65	0.375078	739	0.569701
65	0.255526	739	0.569701
65	0.0566562	739	0.569701
65	0.0117956	755	0.6218
65	0.0280392	755	0.6218
65	0.019162	755	0.6218
65	0.0549735	755	0.6218
65	0.0734627	755	0.6218
65	0.0231782	755	0.6218
65	0.0598157	756	0.532673
65	0.0204114	756	0.532673
65	0.0424622	756	0.532673
65	0.283603	756	0.532673
65	0.911829	756	0.532673
65	0.895942	756	0.532673
65	0.823828	756	0.532673
65	0.261271	756	0.532673
65	0.17032	756	0.532673
65	0.835168	756	0.532673
65	0.505981	756	0.532673
65	0.767419	756	0.532673
65	0.592806	756	0.532673
66	0.644953	757	0.627564
66	0.459937	757	0.627564
66	0.379989	757	0.627564
66	0.194759	757	0.627564
66	0.0433466	757	0.627564
66	0.0129929	757	0.627564
66	0.0324035	766	0.637531
66	0.0242421	766	0.637531
66	0.0576048	766	0.637531
66	0.132721	766	0.637531
66	0.131413	766	0.637531
66	0.123284	766	0.637531
66	0.0593479	766	0.637531
66	0.0359822	766	0.637531
66	0.256997	766	0.637531
66	0.889274	766	0.637531
66	0.809641	766	0.637531
66	0.800666	766	0.637531
66	0.196217	766	0.637531
66	0.107845	768	0.647779
66	0.7148	768	0.647779
66	0.514422	768	0.647779
66	0.795389	768	0.647779
66	0.626827	768	0.647779
68	0.62402	768	0.647779
68	0.437956	768	0.647779
68	0.338595	768	0.647779
68	0.221594	768	0.647779
68	0.0383324	768	0.647779
68	0.012876	768	0.647779
68	0.0264394	768	0.647779
68	0.020604	768	0.647779
68	0.0560564	777	0.583744
68	0.0679814	777	0.583744
68	0.0422237	777	0.583744
68	0.287521	777	0.583744
68	0.841769	777	0.583744
68	0.849619	777	0.583744
68	0.204747	777	0.583744
68	0.121202	777	0.583744
68	0.80646	777	0.583744
68	0.525104	777	0.583744
68	0.795398	777	0.583744
68	0.632079	777	0.583744
69	0.627529	777	0.583744
69	0.418703	782	0.604576
69	0.42818	782	0.604576
69	0.244459	782	0.604576
69	0.0557136	782	0.604576
69	0.0114537	782	0.604576
69	0.0296867	782	0.604576
69	0.0222074	782	0.604576
69	0.0599001	782	0.604576
69	0.100974	782	0.604576
69	0.0436118	782	0.604576
69	0.0708958	782	0.604576
69	0.0282455	782	0.604576
69	0.0523721	782	0.604576
69	0.302273	788	0.619595
69	0.924534	788	0.619595
69	0.878541	788	0.619595
69	0.852458	788	0.619595
69	0.277765	788	0.619595
69	0.19898	788	0.619595
69	0.81473	788	0.619595
69	0.540005	788	0.619595
69	0.788306	788	0.619595
69	0.629652	788	0.619595
70	0.213009	788	0.619595
70	0.0421167	788	0.619595
70	0.0114537	788	0.619595
70	0.0295912	790	0.41523
70	0.0203727	790	0.41523
70	0.0558936	790	0.41523
70	0.0739487	790	0.41523
70	0.0228589	790	0.41523
70	0.0588575	790	0.41523
70	0.021045	790	0.41523
70	0.0420406	790	0.41523
70	0.298681	790	0.41523
70	0.89079	791	0.578621
70	0.812258	792	0.617362
70	0.842153	792	0.617362
70	0.281981	792	0.617362
70	0.129076	792	0.617362
70	0.794266	792	0.617362
70	0.517236	792	0.617362
70	0.799386	792	0.617362
70	0.620233	792	0.617362
78	0.444462	792	0.617362
78	0.389169	792	0.617362
78	0.237536	792	0.617362
78	0.0607475	800	0.550608
78	0.0148788	800	0.550608
78	0.0297824	800	0.550608
78	0.0206951	800	0.550608
78	0.0546927	800	0.550608
78	0.0726148	800	0.550608
78	0.0242138	800	0.550608
78	0.061301	800	0.550608
78	0.0230794	800	0.550608
78	0.0454328	800	0.550608
78	0.298638	800	0.550608
78	0.905782	800	0.550608
78	0.834718	800	0.550608
78	0.866458	801	0.395506
78	0.286904	801	0.395506
78	0.188198	801	0.395506
78	0.727234	801	0.395506
78	0.529329	801	0.395506
78	0.818988	801	0.395506
78	0.653884	801	0.395506
88	0.624571	801	0.395506
88	0.425578	801	0.395506
88	0.40226	801	0.395506
88	0.237454	801	0.395506
88	0.0501901	801	0.395506
88	0.0114537	801	0.395506
88	0.0286	803	0.425375
88	0.0205719	810	0.423396
88	0.0554295	810	0.423396
88	0.0718631	810	0.423396
88	0.0217758	810	0.423396
88	0.0585612	810	0.423396
88	0.0205042	810	0.423396
88	0.0413691	810	0.423396
88	0.281951	810	0.423396
88	0.920836	810	0.423396
88	0.839378	810	0.423396
88	0.844497	811	0.427072
88	0.286367	811	0.427072
88	0.170054	811	0.427072
88	0.706664	811	0.427072
88	0.527311	811	0.427072
88	0.841158	811	0.427072
88	0.647201	811	0.427072
89	0.432337	811	0.427072
89	0.387479	811	0.427072
89	0.244732	811	0.427072
89	0.0561614	811	0.427072
89	0.0118149	811	0.427072
89	0.0292378	811	0.427072
89	0.0212627	813	0.402519
89	0.0567052	813	0.402519
89	0.0739983	813	0.402519
89	0.0228283	813	0.402519
89	0.0594468	813	0.402519
89	0.0211329	813	0.402519
89	0.0423424	813	0.402519
89	0.292632	816	0.62893
89	0.917375	816	0.62893
89	0.878696	816	0.62893
89	0.866208	816	0.62893
89	0.295145	816	0.62893
89	0.175024	816	0.62893
89	0.770908	816	0.62893
89	0.528519	816	0.62893
89	0.825352	816	0.62893
89	0.651319	816	0.62893
90	0.371036	816	0.62893
90	0.232546	818	0.632235
90	0.0546599	818	0.632235
90	0.0116063	818	0.632235
90	0.0276477	818	0.632235
90	0.0223432	818	0.632235
90	0.056671	818	0.632235
90	0.0743966	818	0.632235
90	0.0229347	818	0.632235
90	0.0590797	818	0.632235
90	0.0208257	818	0.632235
90	0.0426454	818	0.632235
90	0.24853	818	0.632235
90	0.920937	821	0.419017
90	0.841579	821	0.419017
90	0.853101	821	0.419017
90	0.286268	821	0.419017
90	0.179024	821	0.419017
90	0.73218	821	0.419017
90	0.531339	821	0.419017
90	0.828427	821	0.419017
90	0.624158	821	0.419017
96	0.250574	821	0.419017
96	0.0519557	821	0.419017
96	0.0121888	821	0.419017
96	0.0302146	821	0.419017
96	0.0205846	822	0.428669
96	0.0548317	822	0.428669
96	0.0685342	822	0.428669
96	0.0211666	822	0.428669
96	0.0582681	822	0.428669
96	0.0205948	822	0.428669
96	0.040818	822	0.428669
96	0.261442	822	0.428669
96	0.917848	822	0.428669
96	0.878887	822	0.428669
96	0.865709	822	0.428669
96	0.273751	822	0.428669
96	0.176328	823	0.631022
96	0.812921	823	0.631022
96	0.531366	823	0.631022
96	0.829016	823	0.631022
96	0.638462	823	0.631022
99	0.232844	823	0.631022
99	0.0552141	823	0.631022
99	0.0114537	823	0.631022
99	0.0272075	823	0.631022
99	0.0204642	823	0.631022
99	0.0559798	823	0.631022
99	0.0737527	823	0.631022
99	0.022449	823	0.631022
99	0.0587173	830	0.430402
99	0.0207572	830	0.430402
99	0.0417394	830	0.430402
99	0.275312	830	0.430402
99	0.92308	830	0.430402
99	0.768733	830	0.430402
99	0.854306	830	0.430402
99	0.280869	830	0.430402
99	0.173679	830	0.430402
99	0.822769	830	0.430402
99	0.522748	830	0.430402
99	0.832714	830	0.430402
99	0.639379	830	0.430402
100	0.0568937	836	0.656613
100	0.036409	836	0.656613
100	0.0648871	836	0.656613
100	0.0397864	836	0.656613
100	0.07819	836	0.656613
100	0.0376675	836	0.656613
100	0.0748547	836	0.656613
100	0.372415	836	0.656613
100	0.924534	836	0.656613
100	0.923969	836	0.656613
100	0.850324	836	0.656613
100	0.302756	836	0.656613
100	0.142366	836	0.656613
100	0.733123	837	0.423131
100	0.552403	837	0.423131
100	0.844632	837	0.423131
100	0.671186	837	0.423131
150	0.0115746	837	0.423131
150	0.0249698	837	0.423131
150	0.0550866	837	0.423131
150	0.0731695	837	0.423131
150	0.0219043	837	0.423131
150	0.0582606	837	0.423131
150	0.0203493	837	0.423131
150	0.0421956	837	0.423131
150	0.227677	852	0.426324
150	0.910932	852	0.426324
150	0.792659	852	0.426324
150	0.860069	852	0.426324
150	0.266563	852	0.426324
150	0.171265	852	0.426324
150	0.748092	852	0.426324
150	0.483331	852	0.426324
151	0.239305	852	0.426324
151	0.0548999	852	0.426324
151	0.0127009	852	0.426324
151	0.0289117	852	0.426324
151	0.0201728	852	0.426324
151	0.0536116	856	0.416096
151	0.0714362	856	0.416096
151	0.0222321	856	0.416096
151	0.0587454	856	0.416096
151	0.021209	856	0.416096
151	0.042291	856	0.416096
151	0.213837	856	0.416096
151	0.922035	856	0.416096
151	0.848399	856	0.416096
151	0.838674	856	0.416096
151	0.181048	856	0.416096
151	0.172239	862	0.421114
151	0.820711	862	0.421114
151	0.508502	862	0.421114
151	0.619117	862	0.421114
151	0.633282	868	0.625737
153	0.237673	868	0.625737
153	0.0515768	868	0.625737
153	0.0114537	868	0.625737
153	0.0300474	868	0.625737
153	0.0210752	868	0.625737
153	0.0560431	868	0.625737
153	0.074128	868	0.625737
153	0.022569	868	0.625737
153	0.0590746	868	0.625737
153	0.0210327	868	0.625737
153	0.0421109	880	0.427161
153	0.256841	880	0.427161
153	0.924534	880	0.427161
153	0.924534	880	0.427161
153	0.840407	880	0.427161
153	0.275801	880	0.427161
153	0.177166	880	0.427161
153	0.658301	880	0.427161
153	0.507987	880	0.427161
153	0.7727	880	0.427161
153	0.629574	880	0.427161
155	0.241952	880	0.427161
155	0.0491972	880	0.427161
155	0.0124483	881	0.391608
155	0.029226	881	0.391608
155	0.0220331	881	0.391608
155	0.0560706	881	0.391608
155	0.0751018	881	0.391608
155	0.0220818	881	0.391608
155	0.0578522	893	0.394702
155	0.0412269	893	0.394702
155	0.189864	893	0.394702
155	0.271323	893	0.394702
155	0.174309	901	0.32605
155	0.725132	901	0.32605
155	0.447231	901	0.32605
155	0.783349	901	0.32605
155	0.633381	901	0.32605
156	0.240643	901	0.32605
156	0.0482037	901	0.32605
156	0.0114537	901	0.32605
156	0.0229677	901	0.32605
156	0.0160675	901	0.32605
156	0.0419077	901	0.32605
156	0.281719	901	0.32605
156	0.920145	901	0.32605
156	0.779398	902	0.363493
156	0.858928	902	0.363493
156	0.266707	902	0.363493
156	0.166839	902	0.363493
156	0.810475	902	0.363493
156	0.530919	902	0.363493
156	0.838148	902	0.363493
156	0.641345	902	0.363493
157	0.250439	902	0.363493
157	0.0583897	902	0.363493
157	0.0164077	903	0.394271
157	0.0321812	903	0.394271
157	0.0293132	903	0.394271
157	0.0692785	903	0.394271
157	0.122535	903	0.394271
157	0.0539716	903	0.394271
157	0.0878616	903	0.394271
157	0.0391054	903	0.394271
157	0.0479849	903	0.394271
157	0.228104	903	0.394271
157	0.922102	903	0.394271
157	0.894632	903	0.394271
157	0.862617	903	0.394271
157	0.308924	908	0.385618
157	0.198475	908	0.385618
157	0.784903	908	0.385618
157	0.535677	908	0.385618
157	0.841445	908	0.385618
157	0.633478	908	0.385618
158	0.234435	908	0.385618
158	0.0487555	908	0.385618
158	0.0114537	908	0.385618
158	0.030195	909	0.355459
158	0.021343	912	0.383338
158	0.0563566	912	0.383338
158	0.0741178	912	0.383338
158	0.0231496	912	0.383338
158	0.059903	912	0.383338
158	0.0218644	912	0.383338
158	0.0436912	912	0.383338
158	0.241931	912	0.383338
158	0.904997	912	0.383338
158	0.802972	912	0.383338
158	0.836239	913	0.349134
158	0.244835	913	0.349134
158	0.161237	913	0.349134
158	0.625062	913	0.349134
158	0.467235	913	0.349134
158	0.810558	913	0.349134
158	0.591872	913	0.349134
159	0.22011	913	0.349134
159	0.0545982	913	0.349134
159	0.0114537	913	0.349134
159	0.0263736	913	0.349134
159	0.0210522	913	0.349134
159	0.0559443	915	0.349594
159	0.0725887	915	0.349594
159	0.021806	915	0.349594
159	0.0590111	915	0.349594
159	0.0211397	915	0.349594
159	0.0417385	915	0.349594
159	0.28473	915	0.349594
159	0.924534	915	0.349594
159	0.774283	915	0.349594
159	0.837733	915	0.349594
159	0.267278	915	0.349594
159	0.11509	915	0.349594
159	0.774701	915	0.349594
159	0.504704	919	0.391108
159	0.78973	919	0.391108
159	0.639741	919	0.391108
301	0.238777	919	0.391108
301	0.0593988	919	0.391108
301	0.0127285	919	0.391108
301	0.0295003	919	0.391108
301	0.0214734	919	0.391108
301	0.0525382	919	0.391108
301	0.0658997	919	0.391108
301	0.019223	919	0.391108
301	0.05876	919	0.391108
301	0.0206566	919	0.391108
301	0.0418227	920	0.361966
301	0.277761	920	0.361966
301	0.924414	920	0.361966
301	0.844272	920	0.361966
301	0.8365	920	0.361966
301	0.285354	920	0.361966
301	0.196519	920	0.361966
301	0.703166	920	0.361966
301	0.515192	920	0.361966
301	0.785306	920	0.361966
301	0.668613	920	0.361966
333	0.8654	920	0.361966
333	0.892339	921	0.275257
333	0.383409	921	0.275257
333	0.273246	921	0.275257
333	0.816607	921	0.275257
333	0.581034	921	0.275257
333	0.825447	921	0.275257
333	0.661949	921	0.275257
338	0.0689153	921	0.275257
338	0.0826001	921	0.275257
338	0.0291266	921	0.275257
338	0.0367055	921	0.275257
338	0.324535	922	0.364521
338	0.924534	922	0.364521
338	0.874733	922	0.364521
338	0.882082	922	0.364521
338	0.362831	922	0.364521
338	0.236156	922	0.364521
338	0.796014	922	0.364521
338	0.534649	922	0.364521
338	0.818028	922	0.364521
338	0.639952	922	0.364521
400	0.634315	923	0.373796
400	0.446329	923	0.373796
400	0.385938	923	0.373796
400	0.238079	923	0.373796
400	0.062636	923	0.373796
400	0.0117738	923	0.373796
400	0.0293772	923	0.373796
400	0.0216968	925	0.387833
400	0.0542239	925	0.387833
400	0.0760945	925	0.387833
400	0.0240167	925	0.387833
400	0.0601126	925	0.387833
400	0.0229022	925	0.387833
400	0.0447687	925	0.387833
400	0.284535	925	0.387833
400	0.924534	925	0.387833
400	0.817188	925	0.387833
400	0.857965	925	0.387833
400	0.265088	925	0.387833
400	0.178246	925	0.387833
400	0.777866	927	0.293622
400	0.500079	927	0.293622
400	0.794399	927	0.293622
400	0.62923	927	0.293622
401	0.632682	927	0.293622
401	0.44338	927	0.293622
401	0.369798	927	0.293622
401	0.251351	930	0.383682
401	0.0524877	930	0.383682
401	0.0133251	930	0.383682
401	0.0296359	930	0.383682
401	0.0236472	930	0.383682
401	0.0571885	930	0.383682
401	0.0851895	930	0.383682
401	0.0320041	930	0.383682
401	0.0683361	930	0.383682
401	0.0257395	930	0.383682
401	0.0461455	930	0.383682
401	0.268195	930	0.383682
401	0.918041	931	0.333342
401	0.865413	931	0.333342
401	0.80636	931	0.333342
401	0.263115	931	0.333342
401	0.190184	931	0.333342
401	0.772061	931	0.333342
401	0.529999	936	0.393432
401	0.834495	936	0.393432
401	0.64106	936	0.393432
402	0.600362	936	0.393432
402	0.444282	936	0.393432
402	0.415985	936	0.393432
402	0.250862	936	0.393432
402	0.0601957	936	0.393432
402	0.0132524	936	0.393432
402	0.0282408	936	0.393432
402	0.0242815	936	0.393432
402	0.061024	936	0.393432
402	0.0811725	936	0.393432
402	0.027495	938	0.433074
402	0.062265	938	0.433074
402	0.0280421	938	0.433074
402	0.0534122	938	0.433074
402	0.257913	938	0.433074
402	0.921778	938	0.433074
402	0.840374	938	0.433074
402	0.868822	938	0.433074
402	0.29545	938	0.433074
402	0.183089	938	0.433074
402	0.838578	938	0.433074
402	0.514015	938	0.433074
402	0.805604	949	0.334456
402	0.637896	949	0.334456
403	0.592076	949	0.334456
403	0.426906	949	0.334456
403	0.342705	949	0.334456
403	0.244933	949	0.334456
403	0.0524123	949	0.334456
403	0.0115466	949	0.334456
403	0.280225	949	0.334456
403	0.177442	949	0.334456
403	0.704998	949	0.334456
403	0.522129	949	0.334456
403	0.795048	949	0.334456
403	0.627046	950	0.299644
404	0.601549	950	0.299644
404	0.408659	950	0.299644
404	0.370545	950	0.299644
404	0.234382	950	0.299644
404	0.0391766	951	0.343811
404	0.0126714	951	0.343811
404	0.027792	951	0.343811
404	0.0229673	951	0.343811
404	0.0580803	951	0.343811
404	0.0774686	951	0.343811
404	0.0247901	951	0.343811
404	0.0604114	951	0.343811
404	0.0221053	951	0.343811
404	0.0437497	951	0.343811
404	0.284021	951	0.343811
404	0.924532	951	0.343811
404	0.804001	951	0.343811
404	0.851592	952	0.37612
404	0.285791	952	0.37612
404	0.183113	952	0.37612
404	0.803913	952	0.37612
404	0.523374	952	0.37612
404	0.785227	952	0.37612
404	0.640284	952	0.37612
405	0.61903	952	0.37612
405	0.383182	952	0.37612
406	0.613911	952	0.37612
406	0.429661	952	0.37612
406	0.403123	952	0.37612
406	0.231662	952	0.37612
406	0.0571073	953	0.308272
406	0.0128158	953	0.308272
407	0.603398	953	0.308272
407	0.40973	953	0.308272
407	0.379609	953	0.308272
407	0.233482	957	0.359594
407	0.0549355	957	0.359594
407	0.0119334	957	0.359594
407	0.0265279	957	0.359594
407	0.0209108	957	0.359594
407	0.0562683	957	0.359594
407	0.0740615	957	0.359594
407	0.0233306	957	0.359594
407	0.0588655	957	0.359594
407	0.0210151	957	0.359594
407	0.0416722	957	0.359594
407	0.29224	957	0.359594
407	0.924534	957	0.359594
407	0.725876	967	0.223088
407	0.846302	967	0.223088
407	0.264782	967	0.223088
407	0.179294	967	0.223088
407	0.761603	967	0.223088
407	0.517056	967	0.223088
407	0.808066	967	0.223088
407	0.650822	967	0.223088
408	0.612264	970	0.248879
408	0.405414	970	0.248879
408	0.378906	970	0.248879
408	0.219316	970	0.248879
408	0.0491133	970	0.248879
408	0.0114537	970	0.248879
408	0.0726355	970	0.248879
408	0.0204663	970	0.248879
408	0.0415474	970	0.248879
408	0.194191	970	0.248879
408	0.910891	970	0.248879
408	0.846664	970	0.248879
408	0.283022	970	0.248879
408	0.162567	976	0.235874
408	0.479919	976	0.235874
408	0.796989	976	0.235874
408	0.643861	976	0.235874
409	0.63379	976	0.235874
409	0.393586	976	0.235874
409	0.364958	976	0.235874
409	0.0418931	976	0.235874
409	0.273933	976	0.235874
409	0.91083	976	0.235874
409	0.682936	976	0.235874
409	0.835692	977	0.232961
409	0.513361	977	0.232961
409	0.79707	977	0.232961
409	0.616807	977	0.232961
410	0.625872	977	0.232961
410	0.419402	977	0.232961
410	0.392032	977	0.232961
410	0.236609	977	0.232961
410	0.0465415	977	0.232961
410	0.0179974	977	0.232961
410	0.0324479	977	0.232961
410	0.0248834	977	0.232961
410	0.0583098	977	0.232961
410	0.0748239	980	0.0114537
410	0.0250599	980	0.0114537
410	0.0611943	980	0.0114537
410	0.0217641	980	0.0114537
410	0.0409973	980	0.0114537
410	0.237961	980	0.0114537
410	0.908641	980	0.0114537
410	0.789846	980	0.0114537
410	0.264446	980	0.0114537
410	0.636822	980	0.0114537
411	0.0132539	980	0.0114537
411	0.0282448	981	0.216166
411	0.0222366	981	0.216166
411	0.0576001	981	0.216166
411	0.0800516	985	0.237839
411	0.026667	985	0.237839
411	0.0624484	985	0.237839
411	0.0243047	985	0.237839
411	0.0472865	985	0.237839
411	0.284976	985	0.237839
411	0.896122	985	0.237839
411	0.783484	985	0.237839
411	0.865436	985	0.237839
411	0.216821	985	0.237839
411	0.182575	985	0.237839
411	0.620947	985	0.237839
411	0.515043	985	0.237839
411	0.817372	988	0.225281
411	0.645608	988	0.225281
412	0.617242	988	0.225281
412	0.381053	988	0.225281
413	0.607122	988	0.225281
413	0.408215	988	0.225281
413	0.364088	988	0.225281
413	0.229597	988	0.225281
413	0.041172	988	0.225281
413	0.0114537	988	0.225281
413	0.0262313	988	0.225281
413	0.0550326	988	0.225281
413	0.0727026	988	0.225281
413	0.0218618	989	0.233406
413	0.0583415	989	0.233406
413	0.0210439	989	0.233406
413	0.0424112	989	0.233406
413	0.269024	989	0.233406
413	0.920152	989	0.233406
413	0.755183	989	0.233406
413	0.849231	989	0.233406
413	0.300371	989	0.233406
413	0.159759	989	0.233406
413	0.788683	989	0.233406
413	0.507949	989	0.233406
413	0.836098	989	0.233406
413	0.642724	990	0.249212
415	0.601324	990	0.249212
415	0.411858	990	0.249212
415	0.277581	990	0.249212
415	0.226815	990	0.249212
415	0.0466315	990	0.249212
415	0.0114537	990	0.249212
415	0.0280777	990	0.249212
415	0.020287	990	0.249212
415	0.0549913	990	0.249212
415	0.0728212	990	0.249212
415	0.0589751	990	0.249212
415	0.0220429	990	0.249212
415	0.0476196	999	0.248259
415	0.29674	999	0.248259
415	0.913547	999	0.248259
415	0.820977	999	0.248259
415	0.875149	999	0.248259
415	0.274294	999	0.248259
415	0.177022	999	0.248259
415	0.822419	999	0.248259
415	0.512949	999	0.248259
415	0.836788	999	0.248259
415	0.639647	999	0.248259
416	0.578466	999	0.248259
416	0.361982	999	0.248259
416	0.21589	1207
416	0.047098	1207
416	0.0119276	1207
416	0.0272801	1208
416	0.0206517	1208
416	0.0548243	1208
416	0.071321	1217
416	0.0220089	1217
416	0.0585293	1217
416	0.0204522	1218
416	0.0411806	1218
416	0.281556	1218
417	0.641748	1223
417	0.432724	1225
417	0.388597	1229
417	0.246671	1229
417	0.0555883	1231
417	0.0138316	1231
417	0.030492	1238
417	0.0233591	1238
417	0.059342	1255
417	0.0810476	1255
417	0.0264336	1256
417	0.0614979	1259
417	0.0227242	1259
417	0.0444294	1260
417	0.288182	1266
417	0.924534	1266
417	0.841962	1268
417	0.854812	1268
417	0.283735	1270
417	0.17712	1278
417	0.766579	1282
417	0.526381	1283
417	0.839501	1283
417	0.62889	1288
418	0.668745	1288
418	0.413459	1308
418	0.368983	1308
418	0.0117003	1309
418	0.0290102	1309
418	0.02455	1311
418	0.0564935	1314
418	0.073038	1319
418	0.0306511	1319
418	0.064604	1323
418	0.0222357	1323
418	0.0390787	1324
418	0.288948	1328
418	0.924534	1332
418	0.858997	1333
418	0.838988	1336
418	0.27795	1336
419	0.596582	1339
419	0.417946	1339
419	0.353944	1360
419	0.220953	1367
419	0.0542963	1373
419	0.0117588	1380
419	0.0243448	1696	0.0458378
419	0.0215627	1696	0.0458378
419	0.056002	1696	0.0458378
419	0.0766592	1696	0.0458378
419	0.0244343	1696	0.0458378
419	0.0602641	1696	0.0458378
419	0.0215553	1696	0.0458378
419	0.0424348	1696	0.0458378
419	0.28448	1696	0.0458378
419	0.924534	1696	0.0458378
419	0.819627	1696	0.0458378
419	0.857571	1696	0.0458378
419	0.285779	1696	0.0458378
419	0.175897	2001	0.0213662
419	0.813371	2001	0.0213662
419	0.526	2001	0.0213662
419	0.789034	2001	0.0213662
419	0.628458	2001	0.0213662
420	0.639797	2001	0.0213662
420	0.425799	2001	0.0213662
420	0.337716	2001	0.0213662
420	0.23745	2001	0.0213662
420	0.0527746	2001	0.0213662
420	0.0114537	2001	0.0213662
420	0.028431	2001	0.0213662
420	0.021583	2001	0.0213662
420	0.0562094	2002	0.0205207
420	0.0739795	2002	0.0205207
420	0.0223073	2002	0.0205207
420	0.0587006	2002	0.0205207
420	0.0407508	2002	0.0205207
420	0.266723	2002	0.0205207
420	0.919411	2002	0.0205207
420	0.870891	2002	0.0205207
420	0.845678	2002	0.0205207
420	0.307032	2003	0.0218445
420	0.165248	2004	0.0206716
420	0.82714	2004	0.0206716
420	0.479804	2004	0.0206716
420	0.789244	2004	0.0206716
420	0.639176	2004	0.0206716
421	0.647114	2004	0.0206716
421	0.421858	2004	0.0206716
421	0.373081	2004	0.0206716
421	0.239473	2004	0.0206716
421	0.0505988	2004	0.0206716
421	0.011818	2004	0.0206716
421	0.0258273	2004	0.0206716
421	0.0219828	2004	0.0206716
421	0.0565682	2005	0.0209516
421	0.0739316	2005	0.0209516
421	0.0219218	2005	0.0209516
421	0.05827	2005	0.0209516
421	0.0206788	2005	0.0209516
421	0.0416424	2005	0.0209516
421	0.289161	2005	0.0209516
421	0.922727	2005	0.0209516
421	0.820012	2006	0.0205541
421	0.865164	2006	0.0205541
421	0.294974	2006	0.0205541
421	0.18228	2006	0.0205541
421	0.552408	2006	0.0205541
421	0.513769	2006	0.0205541
421	0.788385	2006	0.0205541
421	0.632916	2006	0.0205541
422	0.645504	2006	0.0205541
422	0.423164	2006	0.0205541
422	0.36601	2006	0.0205541
422	0.25201	2006	0.0205541
422	0.0618887	2007	0.0205702
422	0.0142378	2007	0.0205702
422	0.0303621	2007	0.0205702
422	0.0257519	2007	0.0205702
422	0.0623562	2007	0.0205702
422	0.0904979	2007	0.0205702
422	0.0309359	2007	0.0205702
422	0.06786	2007	0.0205702
422	0.0277406	2007	0.0205702
422	0.0492606	2007	0.0205702
422	0.290799	2007	0.0205702
422	0.924534	2007	0.0205702
422	0.878827	2007	0.0205702
422	0.835917	2008	0.022261
422	0.426886	2008	0.022261
422	0.796144	2008	0.022261
422	0.633297	2008	0.022261
423	0.640671	2008	0.022261
423	0.42718	2008	0.022261
423	0.413374	2008	0.022261
423	0.25137	2008	0.022261
423	0.0598106	2008	0.022261
423	0.0118593	2008	0.022261
423	0.0249157	2008	0.022261
423	0.0208299	2008	0.022261
423	0.0568348	2008	0.022261
423	0.075949	2009	0.020733
423	0.0236374	2009	0.020733
423	0.0595211	2009	0.020733
423	0.0212307	2009	0.020733
423	0.0431755	2009	0.020733
423	0.29812	2009	0.020733
423	0.924534	2009	0.020733
423	0.890543	2009	0.020733
423	0.854981	2009	0.020733
423	0.268969	2009	0.020733
423	0.172055	2009	0.020733
423	0.762256	2009	0.020733
423	0.5119	2009	0.020733
423	0.814205	2010	0.0212056
423	0.637492	2010	0.0212056
425	0.593116	2010	0.0212056
425	0.430831	2010	0.0212056
425	0.451229	2010	0.0212056
425	0.21084	2010	0.0212056
425	0.0538887	2010	0.0212056
425	0.0123129	2011	0.023658
425	0.0258115	2011	0.023658
425	0.0195308	2011	0.023658
425	0.0554729	2011	0.023658
425	0.128646	2011	0.023658
425	0.0523748	2011	0.023658
425	0.0849287	2011	0.023658
425	0.0283179	2011	0.023658
425	0.0434155	2011	0.023658
425	0.235586	2011	0.023658
425	0.924534	2011	0.023658
425	0.842604	2011	0.023658
425	0.837529	2011	0.023658
425	0.313974	2013	0.0207191
425	0.206181	2017	0.0206814
425	0.8476	2017	0.0206814
425	0.539114	2017	0.0206814
425	0.844073	2017	0.0206814
425	0.626989	2017	0.0206814
426	0.627728	2017	0.0206814
426	0.418061	2017	0.0206814
426	0.375055	2017	0.0206814
426	0.232685	2017	0.0206814
426	0.0590582	2017	0.0206814
426	0.0114537	2017	0.0206814
426	0.0273362	2017	0.0206814
426	0.0206923	2017	0.0206814
426	0.0544727	2019	0.0209616
426	0.0721673	2019	0.0209616
426	0.0218573	2019	0.0209616
426	0.058018	2019	0.0209616
426	0.0208872	2019	0.0209616
426	0.0420609	2019	0.0209616
426	0.278976	2019	0.0209616
426	0.905976	2019	0.0209616
426	0.800664	2019	0.0209616
426	0.840943	2019	0.0209616
426	0.260759	2019	0.0209616
426	0.166452	2019	0.0209616
426	0.74393	2020	0.0208204
426	0.497133	2020	0.0208204
426	0.823693	2020	0.0208204
426	0.643941	2020	0.0208204
428	0.60106	2020	0.0208204
428	0.41506	2020	0.0208204
428	0.343352	2020	0.0208204
428	0.222212	2020	0.0208204
428	0.0496172	2020	0.0208204
428	0.0114537	2020	0.0208204
428	0.0214897	2020	0.0208204
428	0.0206722	2020	0.0208204
428	0.0558817	2020	0.0208204
428	0.0749237	2021	0.0210962
428	0.0231689	2021	0.0210962
428	0.0592332	2021	0.0210962
428	0.0208105	2021	0.0210962
428	0.0415769	2021	0.0210962
428	0.255319	2021	0.0210962
428	0.921018	2021	0.0210962
428	0.825919	2021	0.0210962
428	0.850129	2022	0.0208416
428	0.280023	2022	0.0208416
428	0.175884	2022	0.0208416
428	0.778172	2022	0.0208416
428	0.503583	2022	0.0208416
428	0.767174	2022	0.0208416
[truncated: 43,994 more rows]

## Sheet: Sheet3
0.400689
0.400689
0.400689
0.400689
0.400689
0.400689
0.400689
0.400689
0.400689
0.451475
0.451475
0.451475
0.451475
0.451475
0.451475
0.451475
0.451475
0.451475
0.393231
0.393231
0.704428
0.704428
0.704428
0.704428
0.704428
0.704428
0.704428
0.704428
0.704428
0.704428
0.704428
0.704428
0.704428
0.237733
0.237733
0.237733
0.237733
0.237733
0.237733
0.237733
0.237733
0.237733
0.547151
0.547151
0.547151
0.547151
0.547151
0.547151
0.547151
0.547151
0.547151
0.547151
0.547151
0.547151
0.547151
0.704094
0.704094
0.704094
0.704094
0.704094
0.704094
0.704094
0.704094
0.704094
0.704094
0.704094
0.704094
0.704094
0.0467758
0.0467758
0.0467758
0.0467758
0.0467758
0.0467758
0.0467758
0.0467758
0.0467758
0.0467758
0.0467758
0.646897
0.646897
0.646897
0.646897
0.640271
0.640271
0.640271
0.640271
0.640271
0.640271
0.640271
0.640271
0.640271
0.606167
0.606167
0.606167
0.606167
0.606167
0.606167
0.606167
0.606167
0.606167
0.606167
0.606167
0.606167
0.606167
0.629921
0.629921
0.629921
0.629921
0.629921
0.629921
0.629921
0.629921
0.629921
0.629921
0.629921
0.629921
0.629921
0.783337
0.783337
0.783337
0.783337
0.783337
0.783337
0.783337
0.783337
0.783337
0.783337
0.783337
0.783337
0.783337
0.644953
0.644953
0.644953
0.644953
0.644953
0.644953
0.644953
0.644953
0.644953
0.644953
0.644953
0.644953
0.644953
0.62402
0.62402
0.62402
0.62402
0.62402
0.62402
0.213009
0.213009
0.213009
0.213009
0.213009
0.213009
0.213009
0.213009
0.213009
0.213009
0.213009
0.213009
0.213009
0.444462
0.0568937
0.0568937
0.0568937
0.0568937
0.0568937
0.0568937
0.0568937
0.0568937
0.0568937
0.0568937
0.0568937
0.0568937
0.0568937
0.237673
0.237673
0.237673
0.237673
0.237673
0.237673
0.237673
0.237673
0.237673
0.237673
0.237673
0.237673
0.237673
0.241952
0.241952
0.241952
0.241952
0.241952
0.250439
0.250439
0.250439
0.250439
0.250439
0.250439
0.250439
0.250439
0.250439
0.250439
0.250439
0.250439
0.250439
0.238777
0.238777
0.238777
0.238777
0.238777
0.238777
0.8654
0.8654
0.8654
0.8654
0.8654
0.8654
0.8654
0.8654
0.8654
0.8654
0.8654
0.0689153
0.0689153
0.0689153
0.0689153
0.0689153
0.0689153
0.0689153
0.0689153
0.0689153
0.0689153
0.0689153
0.0689153
0.0689153
0.634315
0.634315
0.634315
0.634315
0.634315
0.634315
0.634315
0.634315
0.634315
0.634315
0.634315
0.634315
0.634315
0.592076
0.592076
0.592076
0.592076
0.592076
0.592076
0.601549
0.601549
0.601549
0.601549
0.601549
0.601549
0.601549
0.601549
0.601549
0.601549
0.601549
0.601549
0.601549
0.603398
0.603398
0.603398
0.603398
0.612264
0.612264
0.612264
0.612264
0.612264
0.612264
0.625872
0.625872
0.625872
0.625872
0.625872
0.625872
0.625872
0.625872
0.607122
0.607122
0.607122
0.607122
0.607122
0.607122
0.607122
0.607122
0.607122
0.607122
0.607122
0.607122
0.639797
0.639797
0.639797
0.639797
0.639797
0.639797
0.639797
0.639797
0.639797
0.639797
0.639797
0.639797
0.645504
0.645504
0.645504
0.645504
0.645504
0.645504
0.645504
0.645504
0.645504
0.645504
0.640671
0.640671
0.640671
0.640671
0.640671
0.640671
0.640671
0.640671
0.640671
0.640671
0.640671
0.640671
0.640671
0.593116
0.593116
0.593116
0.593116
0.593116
0.593116
0.593116
0.593116
0.593116
0.593116
0.593116
0.593116
0.593116
0.616251
0.616251
0.616251
0.616251
0.616251
0.616251
0.616251
0.616251
0.616251
0.616251
0.616251
0.616251
0.621973
0.621973
0.621973
0.621973
0.621973
0.621973
0.621973
0.621973
0.621973
0.621973
0.621973
0.621973
0.621973
0.441368
0.441368
0.441368
0.441368
0.441368
0.441368
0.441368
0.441368
0.441368
0.441368
0.441368
0.441368
0.441368
0.536148
0.536148
0.536148
0.536148
0.536148
0.536148
0.536148
0.536148
0.536148
0.60698
0.60698
0.60698
0.60698
0.60698
0.60698
0.60698
0.60698
0.60698
0.60698
0.60698
0.60698
0.60698
0.617947
0.617947
0.617947
0.617947
0.617947
0.617947
0.617947
0.617947
0.617947
0.617947
0.617947
0.598178
0.598178
0.598178
0.598178
0.598178
0.598178
0.598178
0.598178
0.598178
0.598178
0.609059
0.609059
0.609059
0.609059
0.609059
0.609059
0.609059
0.609059
0.609059
0.609059
0.609059
0.609059
0.609059
0.635317
0.635317
0.635317
0.635317
0.635317
0.635317
0.635317
0.635317
0.635317
0.635317
0.635317
0.635317
0.635317
0.619007
0.619007
0.619007
0.619007
0.619007
0.619007
0.619007
0.619007
0.619007
0.619007
0.619007
0.619007
0.619007
0.599558
0.599558
0.599558
0.599558
0.599558
0.0715574
0.0715574
0.0715574
0.0715574
0.0715574
0.0715574
0.0715574
0.0715574
0.0715574
0.0715574
0.0715574
0.0715574
0.656927
0.656927
0.656927
0.656927
0.656927
0.656927
0.656927
0.656927
0.656927
0.656927
0.656927
0.656927
0.656927
0.643625
0.643625
0.643625
0.643625
0.643625
0.643625
0.643625
0.643625
0.643625
0.643625
0.643625
0.643625
0.643625
0.612253
0.612253
0.612253
0.612253
0.612253
0.612253
0.612253
0.612253
0.612253
0.612253
0.612253
0.60033
0.60033
0.60033
0.60033
0.60033
0.60033
0.60033
0.60033
0.60033
0.60033
0.60033
0.60033
0.60033
0.462279
0.462279
0.462279
0.462279
0.462279
0.462279
0.462279
0.462279
0.462279
0.462279
0.462279
0.462279
0.462279
0.620414
0.620414
0.620414
0.620414
0.620414
0.620414
0.620414
0.620414
0.620414
0.620414
0.620414
0.620414
0.620414
0.645511
0.645511
0.645511
0.645511
0.645511
0.645511
0.645511
0.645511
0.645511
0.645511
0.645511
0.645511
0.645511
0.56473
0.56473
0.56473
0.56473
0.56473
0.56473
0.56473
0.56473
0.56473
0.56473
0.56473
0.56473
0.56473
0.581789
0.581789
0.581789
0.581789
0.581789
0.581789
0.581789
0.581789
0.581789
0.581789
0.581789
0.581789
0.581789
0.596865
0.596865
0.596865
0.596865
0.596865
0.596865
0.596865
0.596865
0.596865
0.596865
0.596865
0.596865
0.596865
0.580903
0.580903
0.580903
0.580903
0.580903
0.580903
0.580903
0.580903
0.580903
0.580903
0.580903
0.580903
0.580903
0.57364
0.589232
0.589232
0.589232
0.589232
0.589232
0.589232
0.589232
0.589232
0.589232
0.589232
0.589232
0.622427
0.622427
0.622427
0.622427
0.427252
0.427252
0.427252
0.427252
0.427252
0.427252
0.427252
0.427252
0.427252
0.427252
0.427252
0.427252
0.427252
0.59286
0.59286
0.59286
0.59286
0.59286
0.59286
0.59286
0.59286
0.59286
0.59286
0.59286
0.59286
0.620984
0.620984
0.620984
0.620984
0.620984
0.620984
0.620984
0.620984
0.620984
0.620984
0.620984
0.620984
0.517473
0.517473
0.517473
0.517473
0.517473
0.517473
0.517473
0.517473
0.517473
0.517473
0.517473
0.517473
0.561069
0.561069
0.561069
0.561069
0.561069
0.561069
0.561069
0.561069
0.561069
0.653741
0.653741
0.653741
0.653741
0.653741
0.653741
0.653741
0.653741
0.653741
0.653741
0.653741
0.653741
0.653741
0.533344
0.629899
0.629899
0.629899
0.650894
0.650894
0.650894
0.650894
0.650894
0.57702
0.57702
0.57702
0.57702
0.584347
0.584347
0.584347
0.584347
0.584347
0.584347
0.584347
0.584347
0.584347
0.584347
0.634461
0.634461
0.634461
0.634461
0.634461
0.634461
0.634461
0.634461
0.634461
0.634461
0.634461
0.634461
0.634461
0.736019
0.736019
0.736019
0.736019
0.736019
0.736019
0.736019
0.736019
0.736019
0.736019
0.736019
0.736019
0.736019
0.615578
0.615578
0.615578
0.615578
0.615578
0.640143
0.640143
0.640143
0.640143
0.640143
0.640143
0.548601
0.548601
0.548601
0.548601
0.548601
0.548601
0.548601
0.548601
0.548601
0.548601
0.548601
0.548601
0.548601
0.612972
0.612972
0.612972
0.612972
0.612972
0.612972
0.612972
0.612972
0.612972
0.612972
0.612972
0.612972
0.612972
0.60366
0.60366
0.60366
0.60366
0.60366
0.60366
0.60366
0.60366
0.60366
0.60366
0.60366
0.60366
0.60366
0.737359
0.737359
0.737359
0.737359
0.737359
0.737359
0.737359
0.737359
0.737359
0.737359
0.737359
0.737359
0.737359
0.624779
0.624779
0.624779
0.624779
0.624779
0.624779
0.624779
0.624779
0.624779
0.624779
0.624779
0.624779
0.624779
0.642583
0.642583
0.642583
0.642583
0.642583
0.642583
0.642583
0.59049
0.62196
0.62196
0.62196
0.62196
0.62196
0.62196
0.543283
0.543283
0.543283
0.651463
0.651463
0.651463
0.651463
0.651463
0.651463
0.651463
0.651463
0.651463
0.651463
0.605757
0.605757
0.605757
0.605757
0.605757
0.605757
0.605757
0.605757
0.605757
0.605757
0.605757
0.605757
0.605757
0.587584
0.587584
0.587584
0.587584
0.587584
0.587584
0.587584
0.587584
0.587584
0.587584
0.587584
0.587584
0.587584
0.518882
0.518882
0.518882
0.518882
0.518882
0.518882
0.518882
0.628243
0.628243
0.628243
0.628243
0.628243
0.628243
0.628243
0.628243
0.628243
0.628243
0.628243
0.628243
0.628243
0.567981
0.567981
0.567981
0.567981
0.606844
0.606844
0.606844
0.606844
0.606844
0.675539
0.625013
0.625013
0.625013
0.625013
0.625013
0.625013
0.625013
0.625013
0.625013
0.625013
0.625013
0.625013
0.625013
0.630718
0.630718
0.630718
0.630718
0.630718
0.630718
0.630718
0.630718
0.630718
0.630718
0.630718
0.630718
0.630718
0.586015
0.586015
0.586015
0.586015
0.586015
0.586015
0.586015
0.586015
0.586015
0.575551
0.575551
0.575551
0.575551
0.575551
0.575551
0.374716
0.374716
0.374716
0.374716
0.374716
0.374716
0.374716
0.374716
0.374716
0.374716
0.374716
0.374716
0.374716
0.607537
0.607537
0.607537
0.607537
0.607537
0.607537
0.607537
0.607537
0.607537
0.607537
0.607537
0.607537
0.565654
0.565654
0.565654
0.565654
0.565654
0.565654
0.565654
0.565654
0.565654
0.565654
0.565654
0.565654
0.565654
0.520861
0.520861
0.520861
0.520861
0.520861
0.520861
0.520861
0.520861
0.520861
0.520861
0.520861
0.520861
0.520861
0.681367
0.681367
0.681367
0.681367
0.681367
0.681367
0.681367
0.681367
0.593723
0.593723
0.593723
0.593723
0.593723
0.593723
0.593723
0.593723
0.593723
0.593723
0.593723
0.593723
0.593723
0.569701
0.569701
0.569701
0.569701
0.569701
0.569701
0.569701
0.569701
0.569701
0.569701
0.569701
0.569701
0.569701
0.6218
0.6218
0.6218
0.6218
0.6218
0.6218
0.532673
0.532673
0.532673
0.532673
0.532673
0.532673
0.532673
0.532673
0.532673
0.532673
0.532673
0.532673
0.532673
0.627564
0.627564
0.627564
0.627564
0.627564
0.627564
0.637531
0.637531
0.637531
0.637531
0.637531
0.637531
0.637531
0.637531
0.637531
0.637531
0.637531
0.637531
0.637531
0.647779
0.647779
0.647779
0.647779
0.647779
0.647779
0.647779
0.647779
0.647779
0.647779
0.647779
0.647779
0.647779
0.583744
0.583744
0.583744
0.583744
0.583744
0.583744
0.583744
0.583744
0.583744
0.583744
0.583744
0.583744
0.583744
0.604576
0.604576
0.604576
0.604576
0.604576
0.604576
0.604576
0.604576
0.604576
0.604576
0.604576
0.604576
0.604576
0.619595
0.619595
0.619595
0.619595
0.619595
0.619595
0.619595
0.619595
0.619595
0.619595
0.619595
0.619595
0.619595
0.41523
0.41523
0.41523
0.41523
0.41523
0.41523
0.41523
0.41523
0.41523
0.578621
0.617362
0.617362
0.617362
0.617362
0.617362
0.617362
0.617362
0.617362
0.617362
0.617362
0.617362
0.550608
0.550608
0.550608
0.550608
0.550608
0.550608
0.550608
0.550608
0.550608
0.550608
0.550608
0.550608
0.550608
0.395506
0.395506
0.395506
0.395506
0.395506
0.395506
0.395506
0.395506
0.395506
0.395506
0.395506
0.395506
0.395506
0.425375
0.423396
0.423396
0.423396
0.423396
0.423396
0.423396
0.423396
0.423396
0.423396
0.423396
0.427072
0.427072
0.427072
0.427072
0.427072
0.427072
0.427072
0.427072
0.427072
0.427072
0.427072
0.427072
0.427072
0.402519
0.402519
0.402519
0.402519
0.402519
0.402519
0.402519
0.62893
0.62893
0.62893
0.62893
0.62893
0.62893
0.62893
0.62893
0.62893
0.62893
0.62893
0.632235
0.632235
0.632235
0.632235
0.632235
0.632235
0.632235
0.632235
0.632235
0.632235
0.632235
0.632235
0.419017
0.419017
0.419017
0.419017
0.419017
0.419017
0.419017
0.419017
0.419017
0.419017
0.419017
0.419017
0.419017
0.428669
0.428669
0.428669
0.428669
0.428669
0.428669
0.428669
0.428669
0.428669
0.428669
0.428669
0.428669
0.631022
0.631022
0.631022
0.631022
0.631022
0.631022
0.631022
0.631022
0.631022
0.631022
0.631022
0.631022
0.631022
0.430402
0.430402
0.430402
0.430402
0.430402
0.430402
0.430402
0.430402
0.430402
0.430402
0.430402
0.430402
0.430402
0.656613
0.656613
0.656613
0.656613
0.656613
0.656613
0.656613
0.656613
0.656613
0.656613
0.656613
0.656613
0.656613
0.423131
0.423131
0.423131
0.423131
0.423131
0.423131
0.423131
0.423131
0.423131
0.423131
0.423131
0.423131
0.426324
0.426324
0.426324
0.426324
0.426324
0.426324
0.426324
0.426324
0.426324
0.426324
0.426324
0.426324
0.426324
0.416096
0.416096
0.416096
0.416096
0.416096
0.416096
0.416096
0.416096
0.416096
0.416096
0.416096
0.421114
0.421114
0.421114
0.421114
0.625737
0.625737
0.625737
0.625737
0.625737
0.625737
0.625737
0.625737
0.625737
0.625737
0.625737
0.427161
0.427161
0.427161
0.427161
0.427161
0.427161
0.427161
0.427161
0.427161
0.427161
0.427161
0.427161
0.427161
0.391608
0.391608
0.391608
0.391608
0.391608
0.391608
0.394702
0.394702
0.394702
0.394702
0.32605
0.32605
0.32605
0.32605
0.32605
0.32605
0.32605
0.32605
0.32605
0.32605
0.32605
0.32605
0.32605
0.363493
0.363493
0.363493
0.363493
0.363493
0.363493
0.363493
0.363493
0.363493
0.363493
0.394271
0.394271
0.394271
0.394271
0.394271
0.394271
0.394271
0.394271
0.394271
0.394271
0.394271
0.394271
0.394271
0.385618
0.385618
0.385618
0.385618
0.385618
0.385618
0.385618
0.385618
0.385618
0.355459
0.383338
0.383338
0.383338
0.383338
0.383338
0.383338
0.383338
0.383338
0.383338
0.383338
0.349134
0.349134
0.349134
0.349134
0.349134
0.349134
0.349134
0.349134
0.349134
0.349134
0.349134
0.349134
0.349594
0.349594
0.349594
0.349594
0.349594
0.349594
0.349594
0.349594
0.349594
0.349594
0.349594
0.349594
0.349594
0.391108
0.391108
0.391108
0.391108
0.391108
0.391108
0.391108
0.391108
0.391108
0.391108
0.391108
0.391108
0.391108
0.361966
0.361966
0.361966
0.361966
0.361966
0.361966
0.361966
0.361966
0.361966
0.361966
0.361966
0.361966
0.275257
0.275257
0.275257
0.275257
0.275257
0.275257
0.275257
0.275257
0.275257
0.275257
0.275257
0.364521
0.364521
0.364521
0.364521
0.364521
0.364521
0.364521
0.364521
0.364521
0.364521
0.373796
0.373796
0.373796
0.373796
0.373796
0.373796
0.373796
0.387833
0.387833
0.387833
0.387833
0.387833
0.387833
0.387833
0.387833
0.387833
0.387833
0.387833
0.387833
0.387833
0.293622
0.293622
0.293622
0.293622
0.293622
0.293622
0.293622
0.383682
0.383682
0.383682
0.383682
0.383682
0.383682
0.383682
0.383682
0.383682
0.383682
0.383682
0.383682
0.333342
0.333342
0.333342
0.333342
0.333342
0.333342
0.393432
0.393432
0.393432
0.393432
0.393432
0.393432
0.393432
0.393432
0.393432
0.393432
0.393432
0.393432
0.393432
0.433074
0.433074
0.433074
0.433074
0.433074
0.433074
0.433074
0.433074
0.433074
0.433074
0.433074
0.433074
0.334456
0.334456
0.334456
0.334456
0.334456
0.334456
0.334456
0.334456
0.334456
0.334456
0.334456
0.334456
0.334456
0.299644
0.299644
0.299644
0.299644
0.299644
0.343811
0.343811
0.343811
0.343811
0.343811
0.343811
0.343811
0.343811
0.343811
0.343811
0.343811
0.343811
0.343811
0.37612
0.37612
0.37612
0.37612
0.37612
0.37612
0.37612
0.37612
0.37612
0.37612
0.37612
0.37612
0.37612
0.308272
0.308272
0.308272
0.308272
0.308272
0.359594
0.359594
0.359594
0.359594
0.359594
0.359594
0.359594
0.359594
0.359594
0.359594
0.359594
0.359594
0.359594
0.223088
0.223088
0.223088
0.223088
0.223088
0.223088
0.223088
0.223088
0.248879
0.248879
0.248879
0.248879
0.248879
0.248879
0.248879
0.248879
0.248879
0.248879
0.248879
0.248879
0.248879
0.235874
0.235874
0.235874
0.235874
0.235874
0.235874
0.235874
0.235874
0.235874
0.235874
0.235874
0.232961
0.232961
0.232961
0.232961
0.232961
0.232961
0.232961
0.232961
0.232961
0.232961
0.232961
0.232961
0.232961
0.0114537
0.0114537
0.0114537
0.0114537
0.0114537
0.0114537
0.0114537
0.0114537
0.0114537
0.0114537
0.0114537
0.216166
0.216166
0.216166
0.237839
0.237839
0.237839
0.237839
0.237839
0.237839
0.237839
0.237839
0.237839
0.237839
0.237839
0.237839
0.237839
0.225281
0.225281
0.225281
0.225281
0.225281
0.225281
0.225281
0.225281
0.225281
0.225281
0.225281
0.225281
0.225281
0.233406
0.233406
0.233406
0.233406
0.233406
0.233406
0.233406
0.233406
0.233406
0.233406
0.233406
0.233406
0.233406
0.249212
0.249212
0.249212
0.249212
0.249212
0.249212
0.249212
0.249212
0.249212
0.249212
0.249212
0.249212
0.249212
0.248259
0.248259
0.248259
0.248259
0.248259
0.248259
0.248259
0.248259
0.248259
0.248259
0.248259
0.248259
0.248259
0.0458378
0.0458378
0.0458378
0.0458378
0.0458378
0.0458378
0.0458378
0.0458378
0.0458378
0.0458378
0.0458378
0.0458378
0.0458378
0.0213662
0.0213662
0.0213662
0.0213662
0.0213662
0.0213662
0.0213662
0.0213662
0.0213662
0.0213662
0.0213662
0.0213662
0.0213662
0.0205207
0.0205207
0.0205207
0.0205207
0.0205207
0.0205207
0.0205207
0.0205207
0.0205207
0.0218445
0.0206716
0.0206716
0.0206716
0.0206716
0.0206716
0.0206716
0.0206716
0.0206716
0.0206716
0.0206716
0.0206716
0.0206716
0.0206716
0.0209516
0.0209516
0.0209516
0.0209516
0.0209516
0.0209516
0.0209516
0.0209516
0.0205541
0.0205541
0.0205541
0.0205541
0.0205541
0.0205541
0.0205541
0.0205541
0.0205541
0.0205541
0.0205541
0.0205541
0.0205702
0.0205702
0.0205702
0.0205702
0.0205702
0.0205702
0.0205702
0.0205702
0.0205702
0.0205702
0.0205702
0.0205702
0.0205702
0.022261
0.022261
0.022261
0.022261
0.022261
0.022261
0.022261
0.022261
0.022261
0.022261
0.022261
0.022261
0.022261
0.020733
0.020733
0.020733
0.020733
0.020733
0.020733
0.020733
0.020733
0.020733
0.020733
0.020733
0.020733
0.020733
0.0212056
0.0212056
0.0212056
0.0212056
0.0212056
0.0212056
0.0212056
0.023658
0.023658
0.023658
0.023658
0.023658
0.023658
0.023658
0.023658
0.023658
0.023658
0.023658
0.023658
0.023658
0.0207191
0.0206814
0.0206814
0.0206814
0.0206814
0.0206814
0.0206814
0.0206814
0.0206814
0.0206814
0.0206814
0.0206814
0.0206814
0.0206814
0.0209616
0.0209616
0.0209616
0.0209616
0.0209616
0.0209616
0.0209616
0.0209616
0.0209616
0.0209616
0.0209616
0.0209616
0.0208204
0.0208204
0.0208204
0.0208204
0.0208204
0.0208204
0.0208204
0.0208204
0.0208204
0.0208204
0.0208204
0.0208204
0.0208204
0.0210962
0.0210962
0.0210962
0.0210962
0.0210962
0.0210962
0.0210962
0.0210962
0.0208416
0.0208416
0.0208416
0.0208416
0.0208416
0.0208416
0.0208416
0.0208416
0.0208416
0.0208416
0.0208416
0.0208416
0.0205615
0.0205615
0.0205615
0.0205615
0.0205615
0.0205615
0.0205615
0.0205615
0.0205615
0.0205615
0.0205615
0.0205615
0.0208217
0.0208217
0.0208217
0.0208217
0.0208217
0.0208217
0.0208217
0.0208217
0.0208217
0.0208217
0.0208217
0.0208217
0.0208217
0.0224291
0.0224291
0.0224291
0.0224291
0.0224291
0.0220939
0.0220939
0.0220939
0.0220939
0.0220939
0.0220939
0.0220939
0.0220939
0.0220939
0.0220939
0.0220939
0.0220939
0.0220939
0.020508
0.020508
0.020508
0.020508
0.020508
0.020508
0.020508
0.020508
0.020508
0.020508
0.020508
[truncated: 16,464 more rows]
