# Supplementary material for: How corporate ESG performance enables New-qualitive Productive forces development based on Listed companies in the manufacturing industry: Evidence from China
Source: Research Square preprint supplement (doi:10.21203/rs.3.rs-6158355/v1), 2025-07-24
Supplement: Supplementary file 7 [file 91527385d84442166f3f5bfb.xlsx]

## Sheet: Sheet1
股票代码	年份	NPRO	新质生产力	E分数	数字化转型程度	无形资产占比	研发人员数量占比	绿色技术水平	绿色专利占比	研究生以上人数占比	固定资产占比	董监高是否具有海外背景	资本积累率A	高管绿色认知	创新水平	行业代码	行业名称	所属省份	所属省份代码	所属城市	所属城市代码
4	2011	0.0854888	8.54888	1	0	0.0578346	0	0	0	3.73	0.1865	1	0.071145	0	0	C27	医药制造业	广东省	440000	深圳市	440300
4	2012	0.0957206	9.57206	1	0.693147	0.0550521	0	0	0	4.33	0.2412	1	0.069696	0	0	C27	医药制造业	广东省	440000	深圳市	440300
4	2013	0.0857899	8.57899	1	0	0.0505603	0	0	0	4.9383	0.1697	1	-0.023971	0	0	C27	医药制造业	广东省	440000	深圳市	440300
4	2014	0.0853099	8.53099	1	0	0.0626161	0	0	0	5.91	0.1118	1	0.089114	0	0	C27	医药制造业	广东省	440000	深圳市	440300
4	2015	0.0932337	9.32337	1	0	0.081097	0	0	0	4.33	0.0948	1	0.037561	1.09861	0	C27	医药制造业	广东省	440000	深圳市	440300
4	2016	0.0877917	8.77917	1	0	0.109017	0	0	0	4.47	0.1496	1	0.091269	0	0	C27	医药制造业	广东省	440000	深圳市	440300
4	2017	0.116691	11.6691	1	1.94591	0.0883302	13.77	0	0	4.65	0.1161	1	0.033065	0	0	C27	医药制造业	广东省	440000	深圳市	440300
4	2018	0.12617	12.617	1	2.89037	0	27.8	0	0	3.33	0.0028	1	-0.004158	0	0	C27	医药制造业	广东省	440000	深圳市	440300
4	2019	0.128041	12.8041	1	3.91202	0.0145727	10.76	0	0	5.18	0.0015	1	6.66096	0	0	C27	医药制造业	广东省	440000	深圳市	440300
8	2015	0.115893	11.5893	1	2.07944	0.0161856	15.25	0	0	5.12	0.1193	1	3.86013	0	0	C37	铁路、船舶、航空航天和其它运输设备制造业	北京市	110000	北京市	110000
8	2016	0.154332	15.4332	1	2.70805	0.0205662	38.52	0	0	13.0321	0.0223	1	1.12254	1.09861	0	C37	铁路、船舶、航空航天和其它运输设备制造业	北京市	110000	北京市	110000
8	2017	0.100019	10.0019	1	3.13549	0.0186982	56.97	0	0	11.58	0.023	0	0.164369	1.09861	0	C37	铁路、船舶、航空航天和其它运输设备制造业	北京市	110000	北京市	110000
8	2018	0.114689	11.4689	1	4.02535	0.0223504	56.63	0	0	11.44	0.0294	0	0.030304	1.09861	0.693147	C37	铁路、船舶、航空航天和其它运输设备制造业	北京市	110000	北京市	110000
8	2019	0.116923	11.6923	1	3.55535	0.0233226	55.27	0	0	10.65	0.0368	0	0.023178	1.09861	1.94591	C37	铁路、船舶、航空航天和其它运输设备制造业	北京市	110000	北京市	110000
8	2020	0.10523	10.523	1	2.30259	0.0260981	57.73	0	0	10.73	0.0351	0	-0.119832	1.09861	1.94591	C37	铁路、船舶、航空航天和其它运输设备制造业	北京市	110000	北京市	110000
8	2021	0.109285	10.9285	3	2.30259	0.0248528	28.21	0	0	9.69	0.0333	0	-0.199811	1.38629	2.19722	C37	铁路、船舶、航空航天和其它运输设备制造业	北京市	110000	北京市	110000
8	2022	0.0925043	9.25043	3	1.38629	0.0228172	27.2	0	0	8.96	0.0387	0	-0.160408	1.09861	1.79176	C37	铁路、船舶、航空航天和其它运输设备制造业	北京市	110000	北京市	110000
8	2023	0.114014	11.4014	5	1.38629	0.0189026	27.78	0	0	9.72	0.0482	0	-0.184316	1.38629	1.09861	C37	铁路、船舶、航空航天和其它运输设备制造业	北京市	110000	北京市	110000
10	2013	0.0037424	1.22037	1	0	0.0076549	0	0	0	1.3423	0.0425	0	2.51508	0	0	C35	专用设备制造业	北京市	110000	北京市	110000
10	2014	0.0050061	1.22037	1	0	0.0063251	0	0	0	1.99	0.0598	0	-0.163858	0	0	C35	专用设备制造业	北京市	110000	北京市	110000
16	2011	0.177323	17.7323	2	2.30259	0.0114976	0	0.693147	0.204082	1.04	0.1052	1	0.002957	0	6.19644	C39	计算机、通信和其他电子设备制造业	广东省	440000	深圳市	440300
16	2012	0.206524	20.6524	2	2.19722	0.0175259	0	1.60944	2.0202	0.93	0.114	1	0.002412	0.693147	5.29331	C39	计算机、通信和其他电子设备制造业	广东省	440000	深圳市	440300
16	2013	0.226673	22.6673	3	2.3979	0.0228406	0	1.94591	4.05405	0.8665	0.1212	1	0.00783	0	5.00395	C39	计算机、通信和其他电子设备制造业	广东省	440000	深圳市	440300
16	2014	0.189941	18.9941	3	1.94591	0.0207175	0	1.09861	1.73913	0.95	0.1063	1	0.003863	0	4.75359	C39	计算机、通信和其他电子设备制造业	广东省	440000	深圳市	440300
16	2015	0.187458	18.7458	2	3.3673	0.0247427	6.54	0.693147	0.689655	0.92	0.1238	1	-0.284356	0	4.98361	C39	计算机、通信和其他电子设备制造业	广东省	440000	深圳市	440300
16	2016	0.191205	19.1205	3	3.4012	0.0175169	0	0.693147	0.909091	0.9086	0.0913	1	0.079029	0	4.70953	C39	计算机、通信和其他电子设备制造业	广东省	440000	深圳市	440300
16	2017	0.181516	18.1516	4	3.43399	0.0087041	7.59	0	0	0.8753	0.0674	1	1.47045	0	4.21951	C39	计算机、通信和其他电子设备制造业	广东省	440000	深圳市	440300
16	2018	0.228726	22.8726	4	4.00733	0.022367	7.74	0.693147	0.775194	0.8648	0.0731	1	0.15286	1.60944	4.86754	C39	计算机、通信和其他电子设备制造业	广东省	440000	深圳市	440300
16	2019	0.219086	21.9086	4	3.61092	0.0284893	7.75	0.693147	1.69491	1.05	0.0601	1	0.050292	1.38629	4.09434	C39	计算机、通信和其他电子设备制造业	广东省	440000	深圳市	440300
16	2020	0.230751	23.0752	4	4.04305	0.0238428	8.74	0.693147	1.92308	1.79	0.0637	1	0.080006	2.07944	3.97029	C39	计算机、通信和其他电子设备制造业	广东省	440000	深圳市	440300
16	2021	0.222445	22.2445	2	3.61092	0.0244591	9.27	1.09861	4.7619	2.4	0.1006	1	-0.048498	2.07944	3.7612	C39	计算机、通信和其他电子设备制造业	广东省	440000	深圳市	440300
16	2022	0.224922	22.4922	2	3.63759	0.0293752	10.59	1.09861	5.12821	2.72	0.1082	1	-0.170531	2.07944	3.68888	C39	计算机、通信和其他电子设备制造业	广东省	440000	深圳市	440300
16	2023	0.16081	16.081	4	3.63759	0.0303529	10.48	0.693147	2.85714	2.59	0.1457	0	-0.302018	2.07944	3.58352	C39	计算机、通信和其他电子设备制造业	广东省	440000	深圳市	440300
17	2014	0.0837661	8.37661	1	0.693147	0.0877458	0	0	0	0	0.015	1	0.75302	0	0	C37	铁路、船舶、航空航天和其它运输设备制造业	广东省	440000	深圳市	440300
17	2015	0.0761422	7.61422	1	0	0.0820814	0	0	0	0	0.022	1	-0.007845	0	0	C37	铁路、船舶、航空航天和其它运输设备制造业	广东省	440000	深圳市	440300
17	2016	0.085888	8.5888	1	0	0.0556867	12.96	0	0	0	0.0689	1	0.290628	0	0	C37	铁路、船舶、航空航天和其它运输设备制造业	广东省	440000	深圳市	440300
17	2017	0.026315	2.6315	1	0.693147	0.0307096	13.73	0	0	0	0.0536	0	0.091377	0	0.693147	C37	铁路、船舶、航空航天和其它运输设备制造业	广东省	440000	深圳市	440300
17	2018	0.0232479	2.32479	1	0.693147	0.0205617	13.21	0	0	0	0	0	-0.099704	0	0.693147	C37	铁路、船舶、航空航天和其它运输设备制造业	广东省	440000	深圳市	440300
17	2019	0.0191268	1.91268	1	0	0.0120031	25.42	0	0	0	0	0	-0.326191	0	0	C37	铁路、船舶、航空航天和其它运输设备制造业	广东省	440000	深圳市	440300
17	2021	0.0439287	4.39287	2	0	0	31.67	0	0	1.64	0	0	-0.06394	0	1.09861	C37	铁路、船舶、航空航天和其它运输设备制造业	广东省	440000	深圳市	440300
17	2022	0.22829	22.829	2	0	0	22.22	1.60944	28.5714	1.59	0	1	11.7005	0	2.70805	C37	铁路、船舶、航空航天和其它运输设备制造业	广东省	440000	深圳市	440300
17	2023	0.0368854	3.68854	1	1.09861	0	15.94	0	0	1.45	0.0062	0	0.014937	0	1.60944	C37	铁路、船舶、航空航天和其它运输设备制造业	广东省	440000	深圳市	440300
20	2011	0.0970472	9.70472	1	0	0.0777448	0	0	0	0.4	0.3106	1	0.038919	1.09861	0	C39	计算机、通信和其他电子设备制造业	广东省	440000	深圳市	440300
20	2012	0.096083	9.6083	1	0	0.0741413	0	0	0	0.19	0.2974	1	0.011706	1.09861	0	C39	计算机、通信和其他电子设备制造业	广东省	440000	深圳市	440300
20	2013	0.0945255	9.45255	1	0	0.0674931	0	0	0	0.191	0.2674	1	-0.023261	1.09861	0	C39	计算机、通信和其他电子设备制造业	广东省	440000	深圳市	440300
20	2014	0.0946846	9.46846	1	1.38629	0.0411671	0	0	0	0.28	0.1603	1	0.028091	0	0	C39	计算机、通信和其他电子设备制造业	广东省	440000	深圳市	440300
20	2015	0.0917737	9.17737	1	1.38629	0.0401496	0	0	0	0	0.0958	1	0.115819	0	0	C39	计算机、通信和其他电子设备制造业	广东省	440000	深圳市	440300
20	2016	0.0797143	7.97143	1	0	0.0709563	0	0	0	0	0.1289	1	0.018352	0	0	C39	计算机、通信和其他电子设备制造业	广东省	440000	深圳市	440300
20	2017	0.0863231	8.63232	1	0	0.0687677	0	0	0	0.6	0.1328	1	0.003048	0.693147	0	C39	计算机、通信和其他电子设备制造业	广东省	440000	深圳市	440300
20	2018	0.0867916	8.67915	1	0	0.0677627	0	0	0	0.3	0.3048	1	0.010275	0	0	C39	计算机、通信和其他电子设备制造业	广东省	440000	深圳市	440300
20	2019	0.0875106	8.75106	1	0	0.0699628	0	0	0	0.2	0.3228	1	0.016854	0	0	C39	计算机、通信和其他电子设备制造业	广东省	440000	深圳市	440300
20	2020	0.0936137	9.36137	1	0	0.0650239	9.07	0	0	0.53	0.3084	1	0.020705	0	0	C39	计算机、通信和其他电子设备制造业	广东省	440000	深圳市	440300
20	2021	0.1221	12.21	3	0.693147	0.0593569	8.57	0	0	0.53	0.2847	1	0.021418	0	0	C39	计算机、通信和其他电子设备制造业	广东省	440000	深圳市	440300
20	2022	0.12378	12.378	3	0	0.0615264	20.55	0	0	1.04	0.2808	1	0.029488	0	0	C39	计算机、通信和其他电子设备制造业	广东省	440000	深圳市	440300
20	2023	0.0531323	5.31323	2	1.09861	0.0626522	20.38	0	0	0.62	0.275	0	0.037735	0	0	C39	计算机、通信和其他电子设备制造业	广东省	440000	深圳市	440300
21	2011	0.296724	29.6724	4	1.94591	0.0051229	0	2.30259	31.0345	0.78	0.1432	1	-0.035216	0.693147	3.4012	C39	计算机、通信和其他电子设备制造业	广东省	440000	深圳市	440300
21	2012	0.23587	23.587	4	0	0.0050948	0	1.94591	20.6897	0.75	0.1235	1	-0.038048	0	3.4012	C39	计算机、通信和其他电子设备制造业	广东省	440000	深圳市	440300
21	2013	0.165415	16.5415	3	1.09861	0.0064769	0	0.693147	7.69231	0.7661	0.0892	1	0.193664	0	2.63906	C39	计算机、通信和其他电子设备制造业	广东省	440000	深圳市	440300
21	2014	0.168653	16.8653	3	1.09861	0.0102353	0	0.693147	5	0.64	0.0969	1	0.019728	0.693147	3.04452	C39	计算机、通信和其他电子设备制造业	广东省	440000	深圳市	440300
21	2015	0.237007	23.7007	3	0.693147	0.0102229	2.41	1.94591	16.6667	0.63	0.1475	1	0.02899	1.09861	3.61092	C39	计算机、通信和其他电子设备制造业	广东省	440000	深圳市	440300
21	2016	0.239331	23.9331	4	1.60944	0.0122749	1.46	1.60944	13.7931	0.473	0.2167	1	0.017605	0.693147	3.4012	C39	计算机、通信和其他电子设备制造业	广东省	440000	深圳市	440300
21	2017	0.188002	18.8002	3	2.48491	0.0138359	2.71	0.693147	5	0.73	0.1469	1	0.119198	0.693147	3.04452	C39	计算机、通信和其他电子设备制造业	广东省	440000	深圳市	440300
21	2018	0.252889	25.2889	2	3.17805	0.0368671	3.16	1.79176	20	0.97	0.1652	1	0.077234	0.693147	3.2581	C39	计算机、通信和其他电子设备制造业	广东省	440000	深圳市	440300
21	2019	0.20328	20.328	3	2.30259	0.0306447	2.08	1.09861	5.40541	0.73	0.1474	1	0.049086	0.693147	3.63759	C39	计算机、通信和其他电子设备制造业	广东省	440000	深圳市	440300
21	2020	0.238829	23.8829	4	2.07944	0.0278526	2.07	1.60944	10.8108	0.77	0.1549	1	0.12783	0.693147	3.63759	C39	计算机、通信和其他电子设备制造业	广东省	440000	深圳市	440300
21	2021	0.328024	32.8024	3	3.04452	0.0219974	2.01	2.56495	40	0.93	0.1575	1	0.432456	0.693147	3.43399	C39	计算机、通信和其他电子设备制造业	广东省	440000	深圳市	440300
21	2022	0.243872	24.3872	3	3.09104	0.0210383	3.39	1.79176	8.92857	1.53	0.1516	1	0.042574	0.693147	4.04305	C39	计算机、通信和其他电子设备制造业	广东省	440000	深圳市	440300
21	2023	0.176224	17.6224	3	2.89037	0.0152769	3.49	1.60944	11.1111	1.61	0.1772	0	0.068462	1.60944	3.61092	C39	计算机、通信和其他电子设备制造业	广东省	440000	深圳市	440300
30	2013	0.0709244	7.09244	1	0	0.0422886	0	0.693147	10	1.7266	0.1943	0	0.131234	0	2.3979	C41	其他制造业	吉林省	220000	长春市	220100
30	2014	0.06448	6.448	1	0	0.0347448	0	0.693147	5.55556	1.77	0.1893	0	0.121074	0	2.94444	C36	汽车制造业	吉林省	220000	长春市	220100
30	2015	0.0412435	4.12435	1	0	0.0341987	12.8	0	0	1.88	0.219	0	0.113953	0	2.70805	C36	汽车制造业	吉林省	220000	长春市	220100
30	2016	0.0947237	9.47237	1	0.693147	0.0327163	12.9	0.693147	14.2857	2.1075	0.1909	0	0.088605	0	2.07944	C36	汽车制造业	吉林省	220000	长春市	220100
30	2017	0.0525501	5.25501	1	1.79176	0.0286178	13	0	0	2.18	0.1711	0	0.095147	0	1.79176	C36	汽车制造业	吉林省	220000	长春市	220100
30	2018	0.0487013	4.87013	1	1.79176	0.0389084	12.61	0	0	2.18	0.1907	0	0.127046	0	1.09861	C36	汽车制造业	吉林省	220000	长春市	220100
30	2019	0.0568123	5.68123	1	1.79176	0.0361397	13	0	0	2.66	0.1815	0	0.045702	0	2.19722	C36	汽车制造业	吉林省	220000	长春市	220100
30	2020	0.0679712	6.79712	1	3.04452	0.0469404	13	0	0	2.84	0.1704	0	0.110148	0	1.79176	C36	汽车制造业	吉林省	220000	长春市	220100
30	2021	0.0900314	9.00314	1	3.55535	0.0460887	12.7	0	0	3.21	0.2013	0	0.028687	0.693147	3.09104	C36	汽车制造业	吉林省	220000	长春市	220100
30	2022	0.0760065	7.60065	1	3.2581	0.0422928	12.8	0	0	3.42	0.1922	0	-0.004854	0.693147	1.60944	C36	汽车制造业	吉林省	220000	长春市	220100
30	2023	0.0907663	9.07663	2	3.33221	0.0353141	14.5	0	0	4.62	0.1713	0	0.039029	0.693147	1.79176	C36	汽车制造业	吉林省	220000	长春市	220100
32	2011	0.0433952	4.33951	1	1.94591	0.198064	0	0	0	0	0.0787	0	0.017481	0	1.09861	C39	计算机、通信和其他电子设备制造业	广东省	440000	深圳市	440300
32	2012	0.0539627	5.39627	1	2.56495	0.178342	0	0	0	2.29	0.0611	0	0.205841	0.693147	0.693147	C39	计算机、通信和其他电子设备制造业	广东省	440000	深圳市	440300
32	2013	0.0533817	5.33817	1	2.94444	0.193851	0	0	0	2.2932	0.044	0	-0.031904	0.693147	0	C39	计算机、通信和其他电子设备制造业	广东省	440000	深圳市	440300
32	2014	0.0445433	4.45433	1	2.56495	0.105664	0	0	0	2.6316	0.0417	0	0.469999	0.693147	0	C39	计算机、通信和其他电子设备制造业	广东省	440000	深圳市	440300
45	2015	0.0366736	3.66736	2	0	0.0136819	7.66	0	0	2.35	0.2661	0	-0.009871	0.693147	0	C39	计算机、通信和其他电子设备制造业	广东省	440000	深圳市	440300
45	2016	0.0258726	2.58726	1	0	0.0096366	8.44	0	0	2.5478	0.1757	0	0.581977	1.09861	0	C39	计算机、通信和其他电子设备制造业	广东省	440000	深圳市	440300
45	2017	0.116632	11.6632	2	0	0.0092643	10.2	0	0	2.62	0.1564	1	0.024098	2.07944	0	C39	计算机、通信和其他电子设备制造业	广东省	440000	深圳市	440300
45	2018	0.117932	11.7932	2	0	0.0082007	10.18	0	0	2.84	0.2139	1	-0.018035	1.94591	0	C39	计算机、通信和其他电子设备制造业	广东省	440000	深圳市	440300
45	2019	0.114584	11.4584	2	0	0.0080589	10.89	0	0	2.47	0.1993	1	0.114218	1.60944	0	C39	计算机、通信和其他电子设备制造业	广东省	440000	深圳市	440300
45	2020	0.109839	10.9839	2	0	0.007254	12.34	0	0	2.63	0.159	1	0.011596	1.09861	0	C39	计算机、通信和其他电子设备制造业	广东省	440000	深圳市	440300
45	2021	0.119256	11.9255	2	0	0.0087276	10.61	0	0	2.51	0.4317	1	0.016545	1.09861	0	C39	计算机、通信和其他电子设备制造业	广东省	440000	深圳市	440300
45	2022	0.123585	12.3585	2	0	0.0078675	12	0	0	2.79	0.3988	1	0.019283	1.60944	0	C39	计算机、通信和其他电子设备制造业	广东省	440000	深圳市	440300
45	2023	0.0598262	5.98262	2	0.693147	0.0070028	12.57	0	0	2.97	0.3657	0	0.020063	1.60944	0	C39	计算机、通信和其他电子设备制造业	广东省	440000	深圳市	440300
49	2011	0.091083	9.1083	1	1.38629	0.0187583	0	0	0	0.56	0.0926	1	0.535892	0	0	C38	电气机械及器材制造业	广东省	440000	深圳市	440300
49	2012	0.091562	9.1562	1	1.60944	0.0137306	0	0	0	0.22	0.0604	1	0.086141	0	0	C38	电气机械及器材制造业	广东省	440000	深圳市	440300
49	2013	0.0260803	2.60803	1	2.19722	0.0070811	0	0	0	0.2661	0.0352	0	0.40534	0	0	C38	电气机械及器材制造业	广东省	440000	深圳市	440300
49	2014	0.0927799	9.27799	1	1.79176	0.0099742	0	0	0	0.6105	0.0347	1	0.407913	0	0	C38	电气机械及器材制造业	广东省	440000	深圳市	440300
49	2015	0.100592	10.0592	1	1.94591	0.0137453	7.12	0	0	0.67	0.0523	1	0.304111	0	0	C38	电气机械及器材制造业	广东省	440000	深圳市	440300
49	2016	0.112396	11.2396	1	2.3979	0.0120805	8.93	0	0	0.7479	0.0441	1	0.25238	0.693147	0	C38	电气机械及器材制造业	广东省	440000	深圳市	440300
49	2017	0.112678	11.2678	1	2.3979	0.0077605	7.14	0	0	0.88	0.0867	1	0.210062	0.693147	0	C38	电气机械及器材制造业	广东省	440000	深圳市	440300
49	2018	0.116352	11.6352	1	2.77259	0.0063615	7.37	0	0	0.75	0.0778	1	0.247586	0.693147	0	C38	电气机械及器材制造业	广东省	440000	深圳市	440300
49	2019	0.0564535	5.64536	1	3.17805	0.0203918	9.13	0	0	0.7	0.0981	0	0.263445	1.09861	0	C38	电气机械及器材制造业	广东省	440000	深圳市	440300
49	2020	0.0601231	6.01231	1	3.49651	0.0238879	8.85	0	0	0.73	0.1026	0	-0.013602	1.09861	0	C38	电气机械及器材制造业	广东省	440000	深圳市	440300
49	2021	0.0705776	7.05776	2	3.29584	0.0220393	8.85	0	0	0.68	0.0791	0	0.215074	1.38629	0	C38	电气机械及器材制造业	广东省	440000	深圳市	440300
49	2022	0.0839233	8.39233	2	3.66356	0.0254468	11.78	0	0	1.17	0.1557	0	0.231836	1.79176	0	C38	电气机械及器材制造业	广东省	440000	深圳市	440300
49	2023	0.0775597	7.75597	2	3.29584	0.0264231	12.97	0	0	1.69	0.2071	0	0.509711	1.09861	0	C38	电气机械及器材制造业	广东省	440000	深圳市	440300
50	2011	0.131078	13.1078	1	0	0.0260285	0	0	0	2.55	0.5681	1	0.171933	1.09861	3.43399	C39	计算机、通信和其他电子设备制造业	广东省	440000	深圳市	440300
50	2012	0.139961	13.9961	2	0.693147	0.026361	0	0	0	3.44	0.5655	1	0.047005	0	3.21888	C39	计算机、通信和其他电子设备制造业	广东省	440000	深圳市	440300
50	2013	0.130862	13.0862	2	0	0.0253514	0	0	0	3.4764	0.4998	1	0.075132	0	3.3673	C39	计算机、通信和其他电子设备制造业	广东省	440000	深圳市	440300
50	2014	0.137771	13.7771	2	1.38629	0.0378508	0	0	0	4.55	0.4981	1	0.972588	0	1.94591	C39	计算机、通信和其他电子设备制造业	广东省	440000	深圳市	440300
50	2015	0.16213	16.213	2	2.63906	0.0442802	14.32	0	0	5.64	0.3165	1	0.547501	0	2.77259	C39	计算机、通信和其他电子设备制造业	广东省	440000	深圳市	440300
50	2016	0.179627	17.9627	2	3.13549	0.048185	16.78	0	0	5.2246	0.2891	1	0.038543	1.60944	2.48491	C39	计算机、通信和其他电子设备制造业	广东省	440000	深圳市	440300
50	2017	0.177342	17.7342	3	3.13549	0.0343677	13.09	0	0	4.24	0.2233	1	0.052027	1.09861	2.19722	C39	计算机、通信和其他电子设备制造业	广东省	440000	深圳市	440300
50	2018	0.16638	16.638	2	3.2581	0.0351856	13.07	0	0	3.58	0.4872	1	0.06203	1.09861	0.693147	C39	计算机、通信和其他电子设备制造业	广东省	440000	深圳市	440300
50	2019	0.172151	17.2151	2	3.4012	0.031642	16.21	0	0	4.69	0.4316	1	0.027014	0.693147	1.60944	C39	计算机、通信和其他电子设备制造业	广东省	440000	深圳市	440300
50	2020	0.174979	17.4979	2	2.94444	0.0294473	19.03	0	0	5.63	0.363	1	0.256901	0	3.49651	C39	计算机、通信和其他电子设备制造业	广东省	440000	深圳市	440300
50	2021	0.210067	21.0067	4	3.29584	0.0211591	23.3	0	0	7.19	0.3021	1	0.038854	0.693147	3.61092	C39	计算机、通信和其他电子设备制造业	广东省	440000	深圳市	440300
50	2022	0.211742	21.1742	4	3.04452	0.0279489	24.88	0	0	7.36	0.2843	1	0.004642	1.38629	3.2581	C39	计算机、通信和其他电子设备制造业	广东省	440000	深圳市	440300
50	2023	0.149452	14.9452	4	2.99573	0.0292954	25.68	0	0	7.11	0.5615	0	-0.041912	1.09861	3.2581	C39	计算机、通信和其他电子设备制造业	广东省	440000	深圳市	440300
63	2011	0.336713	33.6713	3	3.66356	0.0113407	0	3.58352	0.984806	27.45	0.0665	1	0.053152	0.693147	8.17611	C39	计算机、通信和其他电子设备制造业	广东省	440000	深圳市	440300
63	2012	0.33296	33.296	4	3.78419	0.010117	0	3.13549	0.730654	31.18	0.066	1	-0.138844	0	8.01036	C39	计算机、通信和其他电子设备制造业	广东省	440000	深圳市	440300
63	2013	0.344525	34.4525	3	3.63759	0.0123577	0	3.52636	1.84667	30.0927	0.0744	1	0.045716	1.79176	7.48885	C39	计算机、通信和其他电子设备制造业	广东省	440000	深圳市	440300
63	2014	0.36078	36.078	4	3.82864	0.0128485	0	3.66356	1.49724	27.82	0.0692	1	0.112878	1.79176	7.83953	C39	计算机、通信和其他电子设备制造业	广东省	440000	深圳市	440300
63	2015	0.387442	36.9914	4	4.30406	0.0349434	37.46	3.33221	0.964286	28.54	0.0636	1	0.648706	2.07944	7.93773	C39	计算机、通信和其他电子设备制造业	广东省	440000	深圳市	440300
63	2016	0.386917	36.9914	4	4.35671	0.0307404	36.93	3.43399	1.50905	28.02	0.0531	1	-0.05683	1.94591	7.59539	C39	计算机、通信和其他电子设备制造业	广东省	440000	深圳市	440300
63	2017	0.383967	36.9914	6	4.04305	0.0329365	38.71	2.56495	0.652884	31.1864	0.0604	1	0.109944	1.94591	7.51698	C39	计算机、通信和其他电子设备制造业	广东省	440000	深圳市	440300
63	2018	0.407774	36.9914	7	4.23411	0.066165	38.06	2.70805	0.853138	32.1725	0.0688	1	-0.273676	2.3979	7.40367	C39	计算机、通信和其他电子设备制造业	广东省	440000	深圳市	440300
63	2019	0.414335	36.9914	7	4.02535	0.054665	40.39	2.89037	1.08974	33.7	0.0665	1	0.151502	2.48491	7.35308	C39	计算机、通信和其他电子设备制造业	广东省	440000	深圳市	440300
63	2020	0.397583	36.9914	7	3.66356	0.0621853	43.07	2.63906	0.936599	35.5	0.0791	1	0.215212	1.38629	7.23634	C39	计算机、通信和其他电子设备制造业	广东省	440000	深圳市	440300
63	2021	0.420594	36.9914	6	3.82864	0.0479638	46	3.3673	1.70732	37.19	0.0678	1	0.15535	2.07944	7.40306	C39	计算机、通信和其他电子设备制造业	广东省	440000	深圳市	440300
63	2022	0.413202	36.9914	5	3.58352	0.0405732	48.52	3.4012	1.50493	39.2335	0.0714	1	0.117392	2.19722	7.56424	C39	计算机、通信和其他电子设备制造业	广东省	440000	深圳市	440300
63	2023	0.410004	36.9914	5	3.73767	0.0383037	49.09	3.2581	1.84094	40.89	0.0665	1	0.147594	2.07944	7.2145	C39	计算机、通信和其他电子设备制造业	广东省	440000	深圳市	440300
66	2011	0.153806	15.3806	5	2.30259	0.0228759	0	1.09861	10	2.88	0.0988	0	-0.060273	0	3.04452	C39	计算机、通信和其他电子设备制造业	广东省	440000	深圳市	440300
66	2012	0.163281	16.3282	5	1.94591	0.0574775	0	1.09861	9.09091	3.62	0.1015	0	0.002257	1.38629	3.13549	C39	计算机、通信和其他电子设备制造业	广东省	440000	深圳市	440300
66	2013	0.152681	15.2681	5	3.04452	0.0441643	0	0.693147	3.57143	4.1274	0.0943	0	-0.152022	1.38629	3.3673	C39	计算机、通信和其他电子设备制造业	广东省	440000	深圳市	440300
66	2014	0.173976	17.3976	5	2.83321	0.0239215	0	1.09861	12.5	4.12	0.0882	0	-0.025204	1.09861	2.83321	C39	计算机、通信和其他电子设备制造业	广东省	440000	深圳市	440300
66	2015	0.181807	18.1807	5	2.94444	0.0234581	17.86	1.09861	8	4.45	0.0927	0	0.027638	1.09861	3.2581	C39	计算机、通信和其他电子设备制造业	广东省	440000	深圳市	440300
66	2016	0.186375	18.6375	4	2.89037	0.0025983	17.93	1.60944	14.8148	4.33	0.0138	0	0.09215	0	3.33221	C39	计算机、通信和其他电子设备制造业	广东省	440000	深圳市	440300
66	2017	0.270709	27.0709	5	2.94444	0.0264987	27.38	1.09861	8.33333	6.59	0.1223	1	-0.524919	1.94591	3.21888	C39	计算机、通信和其他电子设备制造业	广东省	440000	深圳市	440300
66	2018	0.270271	27.0271	6	3.55535	0.0295418	25.83	0.693147	7.69231	6.44	0.12	1	-0.120149	1.94591	2.63906	C39	计算机、通信和其他电子设备制造业	广东省	440000	深圳市	440300
66	2019	0.271858	27.1858	6	3.63759	0.0210769	31.24	0.693147	3.44828	7.15	0.1284	1	0.166112	1.94591	3.4012	C39	计算机、通信和其他电子设备制造业	广东省	440000	深圳市	440300
66	2020	0.208503	20.8503	7	3.17805	0.0187826	31.03	0.693147	5.55556	7.83	0.1053	0	0.08049	1.94591	2.94444	C39	计算机、通信和其他电子设备制造业	广东省	440000	深圳市	440300
66	2021	0.209512	20.9513	4	3.09104	0.0202109	31.34	1.09861	18.1818	7.89	0.1214	0	0.151522	1.79176	2.48491	C39	计算机、通信和其他电子设备制造业	广东省	440000	深圳市	440300
66	2022	0.185579	18.5578	4	2.77259	0.0225744	30.86	1.09861	11.1111	8.91	0.1258	0	0.37952	0.693147	2.94444	C39	计算机、通信和其他电子设备制造业	广东省	440000	深圳市	440300
66	2023	0.110544	11.0544	4	3.17805	0.0222418	0	0	0	8.91	0.1399	0	-0.065501	0.693147	2.70805	C39	计算机、通信和其他电子设备制造业	广东省	440000	深圳市	440300
68	2013	0.104525	10.4525	1	0	0.0670657	0	0	0	13.8889	0.3628	1	-0.159658	0	0	C39	计算机、通信和其他电子设备制造业	广东省	440000	深圳市	440300
68	2014	0.158281	15.8281	1	1.09861	0.101031	0	0	0	44.5313	0.4877	1	-0.405342	0	0	C39	计算机、通信和其他电子设备制造业	广东省	440000	深圳市	440300
68	2016	0.157126	15.7126	1	1.38629	0.0310347	23.79	0	0	32.78	0.144	1	0.209108	1.09861	0	C39	计算机、通信和其他电子设备制造业	广东省	440000	深圳市	440300
68	2017	0.123827	12.3827	1	0.693147	0.013763	7.57	0	0	24.14	0.0637	1	0.364209	1.09861	0	C39	计算机、通信和其他电子设备制造业	广东省	440000	深圳市	440300
68	2018	0.13551	13.551	1	1.38629	0.0103485	9.43	0	0	25.14	0.0485	1	-0.143006	1.38629	0	C39	计算机、通信和其他电子设备制造业	广东省	440000	深圳市	440300
68	2019	0.137262	13.7262	1	1.38629	0.0272489	7.04	0	0	21.3	0.0485	1	0.022519	2.19722	0	C39	计算机、通信和其他电子设备制造业	广东省	440000	深圳市	440300
70	2011	0.0375774	3.75774	1	0.693147	0.0687366	0	0	0	2	0.2817	0	0.054096	0	1.79176	C39	计算机、通信和其他电子设备制造业	广东省	440000	深圳市	440300
70	2012	0.0215187	2.15187	1	0	0.0533196	0	0	0	1.75	0.1682	0	0.064625	0	1.38629	C38	电气机械及器材制造业	广东省	440000	深圳市	440300
70	2013	0.0428755	4.28755	1	1.38629	0.0377257	0	0	0	2.2623	0.1882	0	0.192467	0	2.19722	C38	电气机械及器材制造业	广东省	440000	深圳市	440300
70	2014	0.100813	10.0813	1	2.63906	0.0298516	0	0.693147	11.1111	2.16	0.1836	0	0.082269	0	2.30259	C38	电气机械及器材制造业	广东省	440000	深圳市	440300
70	2015	0.138258	13.8258	1	2.19722	0.0351967	12.43	0	0	1.6	0.1341	1	0.117331	0.693147	2.77259	C38	电气机械及器材制造业	广东省	440000	深圳市	440300
70	2016	0.106523	10.6523	1	0.693147	0.0267371	12.56	0	0	1.29	0.1228	1	0.107866	0	1.60944	C38	电气机械及器材制造业	广东省	440000	深圳市	440300
70	2017	0.133508	13.3508	1	1.60944	0.0208738	14.77	0	0	1.32	0.0983	1	0.168835	1.09861	2.63906	C38	电气机械及器材制造业	广东省	440000	深圳市	440300
70	2018	0.130737	13.0737	1	1.38629	0.0193849	14.64	0	0	1.74	0.0965	1	0.20691	0.693147	3.04452	C38	电气机械及器材制造业	广东省	440000	深圳市	440300
70	2019	0.135111	13.5111	1	2.30259	0.0218712	15.45	0	0	2.68	0.0822	1	0.309644	0.693147	2.07944	C38	电气机械及器材制造业	广东省	440000	深圳市	440300
70	2020	0.152369	15.2369	1	2.70805	0.0143889	18.36	0	0	3.51	0.0559	1	0.031218	0.693147	3.66356	C38	电气机械及器材制造业	广东省	440000	深圳市	440300
70	2021	0.212764	21.2764	2	3.21888	0.0163524	19.22	1.09861	5.26316	3.07	0.0616	1	-0.152731	0.693147	3.66356	C38	电气机械及器材制造业	广东省	440000	深圳市	440300
70	2022	0.205232	20.5232	2	3.29584	0.0258996	19.03	0.693147	9.09091	2.68	0.1452	1	-0.061354	0.693147	2.48491	C38	电气机械及器材制造业	广东省	440000	深圳市	440300
70	2023	0.100403	10.0403	3	3.4012	0.0155465	18.37	0	0	2.68	0.1645	0	0.051657	0	2.3979	C38	电气机械及器材制造业	广东省	440000	深圳市	440300
78	2011	0.0781742	7.81742	1	0	0.036478	0	0	0	1.87	0.0853	1	0.075798	0	0	C27	医药制造业	广东省	440000	深圳市	440300
100	2011	0.190151	19.0151	3	1.79176	0.0183916	0	1.09861	2.94118	2.14	0	1	0.065812	0.693147	4.23411	C39	计算机、通信和其他电子设备制造业	广东省	440000	惠州市	441300
100	2012	0.191487	19.1486	5	2.19722	0.0225569	0	0	0	2.19	0.2675	1	0.049252	0.693147	4.45435	C39	计算机、通信和其他电子设备制造业	广东省	440000	惠州市	441300
100	2013	0.257459	25.7459	6	3.04452	0.0239915	0	1.60944	3.0303	2.1281	0	1	-0.013581	0.693147	4.89035	C39	计算机、通信和其他电子设备制造业	广东省	440000	惠州市	441300
100	2014	0.235974	23.5974	6	4.36945	0.0241549	0	0.693147	0.675676	2.68	0	1	0.345845	0	5.00395	C39	计算机、通信和其他电子设备制造业	广东省	440000	惠州市	441300
100	2015	0.262252	26.2252	6	4.41884	0.0267028	9.11	1.09861	1.6129	3.24	0	1	0.400921	0.693147	4.82831	C39	计算机、通信和其他电子设备制造业	广东省	440000	惠州市	441300
100	2016	0.262179	26.2179	5	3.95124	0.0323199	8.55	1.60944	2.51572	6.6414	0	1	0.215718	0	5.07517	C39	计算机、通信和其他电子设备制造业	广东省	440000	惠州市	441300
100	2017	0.257643	25.7643	5	4.3438	0.0397551	10.56	1.38629	1.52284	3.468	0	1	0.183535	0	5.28827	C39	计算机、通信和其他电子设备制造业	广东省	440000	惠州市	441300
100	2018	0.320391	32.0391	6	3.49651	0.030892	16.63	2.70805	8.28402	7.94	0	1	0.124277	0	5.1358	C39	计算机、通信和其他电子设备制造业	广东省	440000	惠州市	441300
100	2019	0.349223	34.9223	4	2.56495	0.0344844	17.4	4.02535	17.134	7.0494	0	1	0.049472	0	5.77455	C39	计算机、通信和其他电子设备制造业	广东省	440000	惠州市	441300
100	2020	0.349562	34.9562	3	1.94591	0.038983	16.83	4.36945	21.3115	5.76	0	1	0.409716	0	5.90536	C39	计算机、通信和其他电子设备制造业	广东省	440000	惠州市	441300
100	2021	0.384423	36.9914	4	0	0.0452904	16.14	4.69135	34.0694	5.215	0	1	0.32855	1.09861	5.76205	C39	计算机、通信和其他电子设备制造业	广东省	440000	惠州市	441300
100	2022	0.371328	36.9914	4	1.60944	0.0466225	17.16	4.11087	26.9058	6.0792	0	1	0.104268	1.38629	5.41165	C39	计算机、通信和其他电子设备制造业	广东省	440000	惠州市	441300
100	2023	0.195295	19.5295	5	2.99573	0.0481105	15.04	1.60944	3.33333	6.0792	0	0	0.099344	1.09861	4.79579	C39	计算机、通信和其他电子设备制造业	广东省	440000	惠州市	441300
153	2011	0.0262735	2.62735	1	0	0.122562	0	0	0	0	0.365	0	0.015155	0	0.693147	C27	医药制造业	安徽省	340000	芜湖市	340200
153	2012	0.0368905	3.68905	1	0	0.111642	0	0	0	0	0.3601	0	0.014296	0	2.30259	C27	医药制造业	安徽省	340000	芜湖市	340200
153	2013	0.0250173	2.50173	1	0	0.0813744	0	0	0	0	0.3191	0	0.360363	0	1.09861	C27	医药制造业	安徽省	340000	芜湖市	340200
153	2014	0.0296061	2.96061	1	0	0.0716225	0	0	0	0	0.273	0	0.024166	0	2.07944	C27	医药制造业	安徽省	340000	芜湖市	340200
153	2015	0.0258159	2.58159	1	0	0.0691034	2.46	0	0	0	0.2601	0	0.032535	0	1.38629	C27	医药制造业	安徽省	340000	芜湖市	340200
153	2016	0.0979357	9.79357	1	0	0.0496043	2.53	0	0	0	0.3389	1	-0.038657	1.09861	0	C27	医药制造业	安徽省	340000	芜湖市	340200
153	2017	0.0983287	9.83287	1	0	0.0432769	2.89	0	0	0	0.2891	1	0.058713	1.38629	0	C27	医药制造业	安徽省	340000	芜湖市	340200
153	2018	0.100733	10.0733	1	0	0.0448711	3.32	0	0	0	0.2523	1	0.058446	1.79176	0	C27	医药制造业	安徽省	340000	芜湖市	340200
153	2019	0.0262983	2.62983	1	0	0.0382469	3.42	0	0	0	0.2015	0	0.027351	1.60944	0	C27	医药制造业	安徽省	340000	芜湖市	340200
153	2020	0.0349369	3.49369	1	0	0.0430318	3.51	0	0	0	0.1857	0	0.091068	2.07944	0.693147	C27	医药制造业	安徽省	340000	芜湖市	340200
153	2021	0.0410596	4.10596	1	0.693147	0.0425534	3.66	0	0	0	0.1847	0	0.075778	2.48491	0	C27	医药制造业	安徽省	340000	芜湖市	340200
153	2022	0.106405	10.6405	1	0	0.0380917	3.57	0	0	0	0.2185	1	-0.009357	2.63906	0	C27	医药制造业	安徽省	340000	芜湖市	340200
153	2023	0.0416664	4.16664	1	0	0.0463939	3.58	0	0	0	0.2147	0	0.093496	2.70805	0.693147	C27	医药制造业	安徽省	340000	芜湖市	340200
155	2011	0.0504022	5.04022	2	0	0.0201578	0	0	0	0.1	0.5125	0	-0.129539	2.07944	0	C26	化学原料及化学制品制造业	四川省	510000	成都市	510100
155	2013	0.30077	30.077	3	0	0.0164453	0	0.693147	100	0.1778	0.4482	0	-0.483031	1.79176	0.693147	C26	化学原料及化学制品制造业	四川省	510000	成都市	510100
155	2017	0.0519729	5.19729	1	1.38629	0.0054088	0	0	0	10.64	0.3827	0	-0.108305	1.09861	0	C26	化学原料及化学制品制造业	四川省	510000	成都市	510100
155	2018	0.0523897	5.23897	1	1.09861	0.0101703	0	0	0	15.09	0.4247	0	0.030498	0.693147	0	C26	化学原料及化学制品制造业	四川省	510000	成都市	510100
155	2019	0.0322473	3.22473	1	0	0.0103293	0	0	0	13.97	0.3991	0	0.114472	0	0	C26	化学原料及化学制品制造业	四川省	510000	成都市	510100
157	2011	0.190929	19.0929	3	0	0.0364048	0	1.60944	2.31214	4.82	0.0573	1	0.297015	0	5.15906	C35	专用设备制造业	湖南省	430000	长沙市	430100
157	2012	0.223027	22.3027	1	0	0.0306956	0	3.09104	2.78146	5.86	0.0514	1	0.155865	0	6.62804	C35	专用设备制造业	湖南省	430000	长沙市	430100
157	2013	0.185493	18.5493	2	0	0.0327348	0	1.38629	0.35503	6.4711	0	1	0.020943	0.693147	6.74052	C35	专用设备制造业	湖南省	430000	长沙市	430100
157	2014	0.231211	23.1211	3	1.09861	0.0352714	0	2.30259	0.986842	6.45	0	1	-0.019111	0	6.81674	C35	专用设备制造业	湖南省	430000	长沙市	430100
157	2015	0.290277	29.0277	3	2.48491	0.0495069	21.85	3.17805	3.14637	5.57	0	1	-0.015487	0	6.59578	C35	专用设备制造业	湖南省	430000	长沙市	430100
157	2016	0.237911	23.7911	3	2.19722	0.0537681	20.92	1.79176	1.32979	5.3253	0	1	-0.069298	0	5.93224	C35	专用设备制造业	湖南省	430000	长沙市	430100
157	2017	0.232072	23.2072	3	2.3979	0.0493124	19.85	1.38629	1.60428	5.01	0	1	0.011439	1.09861	5.23644	C35	专用设备制造业	湖南省	430000	长沙市	430100
157	2018	0.206295	20.6295	1	2.89037	0.0429514	20.63	1.09861	2.10526	5.6147	0	1	0.014157	1.38629	4.56435	C35	专用设备制造业	湖南省	430000	长沙市	430100
157	2019	0.18433	18.433	2	2.94444	0.0439666	23.09	0	0	6.46	0	1	0.019725	1.38629	4.49981	C35	专用设备制造业	湖南省	430000	长沙市	430100
157	2020	0.243435	24.3435	2	3.29584	0.0391717	25.47	1.38629	1.54639	7.92	0	1	0.21131	1.79176	5.273	C35	专用设备制造业	湖南省	430000	长沙市	430100
157	2021	0.271292	27.1292	4	3.46574	0.0448449	27.82	1.38629	1.05263	9.1	0	1	0.217392	1.60944	5.65599	C35	专用设备制造业	湖南省	430000	长沙市	430100
157	2022	0.319769	31.9769	5	3.4012	0.0431034	29.71	2.3979	1.79533	10.16	0	1	-0.022676	1.60944	6.32436	C35	专用设备制造业	湖南省	430000	长沙市	430100
157	2023	0.262312	26.2312	5	3.7612	0.0388582	32.7	2.56495	3.38028	12.08	0	0	0.038474	1.60944	5.87493	C35	专用设备制造业	湖南省	430000	长沙市	430100
301	2018	0.06223	6.223	1	2.07944	0.0357966	11.94	0	0	0	0.3847	0	0.963184	1.60944	0	C28	化学纤维制造业	江苏省	320000	苏州市	320500
301	2019	0.0607006	6.07006	1	2.07944	0.0408427	9.67	0	0	0	0.3811	0	-0.025221	1.60944	0	C28	化学纤维制造业	江苏省	320000	苏州市	320500
301	2020	0.0478665	4.78665	1	1.38629	0.0355625	9.44	0	0	0	0.2189	0	0.473715	1.79176	0	C28	化学纤维制造业	江苏省	320000	苏州市	320500
301	2021	0.0648143	6.48143	2	1.09861	0.0231409	9.23	0	0	9.25	0.2363	0	-0.0245	1.60944	0	C28	化学纤维制造业	江苏省	320000	苏州市	320500
301	2022	0.0543156	5.43156	2	1.38629	0.0251175	9.24	0	0	0.87	0.2399	0	0.212256	1.09861	0	C28	化学纤维制造业	江苏省	320000	苏州市	320500
301	2023	0.118636	11.8636	5	2.19722	0.025736	13.52	0	0	0.87	0.6489	0	-0.023467	1.38629	0	C28	化学纤维制造业	江苏省	320000	苏州市	320500
333	2013	0.215867	21.5867	1	2.70805	0.0343051	0	2.19722	1.01781	0.9479	0	1	0.17835	0	6.66823	C38	电气机械及器材制造业	广东省	440000	佛山市	440600
333	2014	0.255559	25.5559	3	3.78419	0.0285302	0	2.07944	2.07715	1.41	0.1623	1	0.170184	0.693147	5.82305	C38	电气机械及器材制造业	广东省	440000	佛山市	440600
333	2015	0.218977	21.8977	2	3.04452	0.02633	9.3	1.60944	2.8169	2.01	0.1454	1	0.225232	0	4.96284	C38	电气机械及器材制造业	广东省	440000	佛山市	440600
333	2016	0.270011	27.0011	2	2.77259	0.0402609	9.07	3.04452	5.71429	2.2579	0.1234	1	0.231032	0	5.86079	C38	电气机械及器材制造业	广东省	440000	佛山市	440600
333	2017	0.299678	29.9678	3	3.93183	0.0611311	10.33	3.09104	7.95455	2.85	0.0911	1	0.20222	0	5.57973	C38	电气机械及器材制造业	广东省	440000	佛山市	440600
333	2018	0.227519	22.7519	1	4.06044	0.0613826	10.74	1.60944	1.91388	3.27	0.0851	1	0.114915	0.693147	5.34711	C38	电气机械及器材制造业	广东省	440000	佛山市	440600
333	2019	0.248088	24.8088	2	3.93183	0.0512797	10.18	1.79176	2.38095	3.28	0.0717	1	0.162692	1.38629	5.35186	C38	电气机械及器材制造业	广东省	440000	佛山市	440600
333	2020	0.245064	24.5064	2	4.26268	0.0427945	10.77	1.60944	4.44444	3.72	0.0617	1	0.155736	1.38629	4.51086	C38	电气机械及器材制造业	广东省	440000	佛山市	440600
333	2021	0.258572	25.8572	3	4.65396	0.0442666	10.92	1.38629	4.22535	3.32	0.0589	1	0.085224	2.19722	4.27667	C38	电气机械及器材制造业	广东省	440000	佛山市	440600
333	2022	0.262208	26.2208	3	4.40672	0.0400159	12.5	1.38629	6.66667	3.93	0.0617	1	0.126822	2.48491	3.82864	C38	电气机械及器材制造业	广东省	440000	佛山市	440600
333	2023	0.140175	14.0175	4	4.17439	0.0379759	11.69	0	0	3.65	0.0637	0	0.147283	2.19722	3.49651	C38	电气机械及器材制造业	广东省	440000	佛山市	440600
338	2011	0.208349	20.8349	3	0.693147	0.0187749	0	1.79176	6.66667	3.11	0.1568	1	0.23674	0	4.33073	C36	汽车制造业	山东省	370000	潍坊市	370700
338	2012	0.202515	20.2515	1	0	0.0325731	0	2.30259	8.03571	5.15	0.1738	1	0.086375	0	4.72739	C36	汽车制造业	山东省	370000	潍坊市	370700
338	2013	0.213054	21.3054	1	0	0.0289529	0	2.77259	7.8534	0	0.1675	1	0.093253	0	5.25749	C36	汽车制造业	山东省	370000	潍坊市	370700
338	2014	0.254507	25.4507	1	1.09861	0.1056	0	3.3673	5.14706	0	0.1845	1	0.190143	0.693147	6.30079	C36	汽车制造业	山东省	370000	潍坊市	370700
338	2015	0.246145	24.6145	1	0	0.111953	7.11	3.2581	6.39386	0	0.206	1	-0.005136	0.693147	5.97126	C36	汽车制造业	山东省	370000	潍坊市	370700
338	2016	0.272608	27.2608	2	0.693147	0.154661	7.55	3.58352	7.2314	0	0.1573	1	0.062586	0	6.18415	C36	汽车制造业	山东省	370000	潍坊市	370700
338	2017	0.266952	26.6953	2	1.94591	0.125713	8.45	2.94444	6.74157	0	0.1427	1	0.27287	0.693147	5.59099	C36	汽车制造业	山东省	370000	潍坊市	370700
338	2018	0.309248	30.9248	2	1.60944	0.113503	9.1	3.63759	7.37052	0	0.1435	1	0.10477	3.09104	6.22059	C36	汽车制造业	山东省	370000	潍坊市	370700
338	2019	0.317725	31.7724	3	1.38629	0.0989546	9.36	3.8712	8.7037	0	0.1111	1	0.120711	2.07944	6.29342	C36	汽车制造业	山东省	370000	潍坊市	370700
338	2020	0.384717	36.9914	3	2.48491	0.0879989	6.72	5.17615	14.7157	0	0.1172	1	0.152757	2.19722	7.08757	C36	汽车制造业	山东省	370000	潍坊市	370700
338	2021	0.418215	36.9914	6	2.77259	0.0754687	12.62	5.1299	12.0258	0	0.1198	1	0.27587	2.07944	7.2428	C36	汽车制造业	山东省	370000	潍坊市	370700
338	2022	0.442546	36.9914	7	3.85015	0.0775012	15.93	5.11199	10.2167	0	0.129	1	-0.013308	2.30259	7.38771	C36	汽车制造业	山东省	370000	潍坊市	370700
338	2023	0.351626	35.1626	7	3.21888	0.0690246	16.81	4.75359	10.2313	0	0.1319	0	0.082365	2.19722	7.02554	C36	汽车制造业	山东省	370000	潍坊市	370700
400	2011	0.138601	13.8601	3	2.3979	0.0106564	0	0	0	7.13	0.1188	1	0.075676	0.693147	0	C38	电气机械及器材制造业	河南省	410000	许昌市	411000
400	2012	0.0380882	3.80882	1	2.07944	0.0065531	0	0	0	7.98	0.1505	0	0.074409	0	0	C38	电气机械及器材制造业	河南省	410000	许昌市	411000
400	2013	0.283783	28.3783	1	2.19722	0.0047556	0	0.693147	100	9.2668	0.121	0	0.197544	0	0.693147	C38	电气机械及器材制造业	河南省	410000	许昌市	411000
400	2014	0.282059	28.2059	3	2.07944	0.00713	0	1.79176	35.7143	11.42	0.0954	1	0.312695	0	2.70805	C38	电气机械及器材制造业	河南省	410000	许昌市	411000
400	2015	0.28097	28.097	3	1.38629	0.0083359	38.77	1.60944	25	12.2	0.0794	1	0.102255	0.693147	2.83321	C38	电气机械及器材制造业	河南省	410000	许昌市	411000
400	2016	0.316766	31.6766	3	2.3979	0.0155914	0.3954	2.56495	70.5882	13.14	0.0722	0	0.098797	0	2.89037	C38	电气机械及器材制造业	河南省	410000	许昌市	411000
400	2017	0.32461	32.461	3	2.30259	0.0256598	37.14	1.79176	35.7143	12.3278	0.0783	1	0.076049	1.38629	2.70805	C38	电气机械及器材制造业	河南省	410000	许昌市	411000
400	2018	0.399048	36.9914	3	2.48491	0.033759	40.76	1.79176	71.4286	13.3395	0.0841	1	0.028097	0.693147	2.07944	C38	电气机械及器材制造业	河南省	410000	许昌市	411000
400	2019	0.337397	33.7397	4	2.56495	0.0414161	40.55	1.38629	42.8571	13.47	0.0865	1	0.038766	0.693147	2.07944	C38	电气机械及器材制造业	河南省	410000	许昌市	411000
400	2020	0.292918	29.2918	3	3.3673	0.0477618	44.15	0.693147	33.3333	13.88	0.0951	1	0.027521	0.693147	1.38629	C38	电气机械及器材制造业	河南省	410000	许昌市	411000
400	2021	0.28118	28.118	2	2.83321	0.0453988	45.58	0.693147	33.3333	15.07	0.0861	1	0.104075	1.09861	1.38629	C38	电气机械及器材制造业	河南省	410000	许昌市	411000
400	2022	0.297389	29.7389	2	2.48491	0.040317	44.52	1.09861	33.3333	17.71	0.0857	1	0.073802	1.38629	1.94591	C38	电气机械及器材制造业	河南省	410000	许昌市	411000
400	2023	0.155864	15.5864	6	2.70805	0.0363618	44.27	0	0	20.42	0.0804	0	0.05369	1.09861	0	C38	电气机械及器材制造业	河南省	410000	许昌市	411000
403	2018	0.0198626	1.98626	1	0	0.0527632	6.21	0	0	0	0.3135	0	0.142586	0	0	C27	医药制造业	山西省	140000	太原市	140100
403	2019	0.0077172	1.22037	1	0	0.042637	7.25	0	0	0	0	0	0.289703	0	0	C27	医药制造业	山西省	140000	太原市	140100
403	2020	0.079298	7.9298	1	0	0.0396099	8.87	0	0	0	0	1	0.206215	0	0	C27	医药制造业	山西省	140000	太原市	140100
403	2021	0.0960443	9.60443	1	0	0.0282249	13.76	0	0	0	0	1	5.5443	1.60944	0	C27	医药制造业	山西省	140000	太原市	140100
403	2022	0.0912128	9.12128	1	0	0.0241177	7.64	0	0	0	0	1	0.084295	1.60944	0	C27	医药制造业	山西省	140000	太原市	140100
403	2023	0.0234156	2.34156	2	0	0.0246328	6.64	0	0	0	0	0	0.081727	0.693147	0	C27	医药制造业	山西省	140000	太原市	140100
404	2011	0.0898768	8.98768	1	0	0.0264037	0	0	0	0.57	0.1848	1	0.060034	0	1.38629	C34	通用设备制造业	江西省	360000	景德镇市	360200
404	2012	0.0938848	9.38848	1	0	0.0323374	0	0	0	0.7	0.1763	1	0.184906	0.693147	1.09861	C34	通用设备制造业	江西省	360000	景德镇市	360200
404	2013	0.0972098	9.72098	1	0.693147	0.0240588	0	0	0	0.9637	0.1455	1	1.22682	0.693147	0.693147	C34	通用设备制造业	江西省	360000	景德镇市	360200
404	2014	0.130226	13.0227	3	0.693147	0.0229381	0	0	0	0.9582	0.1778	1	0.084432	0	2.83321	C34	通用设备制造业	江西省	360000	景德镇市	360200
404	2015	0.0992436	9.92436	2	0	0.0234164	9.9	0	0	1.17	0.1911	1	0.099022	0	0	C34	通用设备制造业	江西省	360000	景德镇市	360200
404	2016	0.118358	11.8358	2	0	0.0193588	10.39	0	0	1.365	0.1676	1	0.096316	0	2.77259	C34	通用设备制造业	江西省	360000	景德镇市	360200
404	2017	0.146715	14.6715	3	0.693147	0.0184896	10.32	0	0	1.29	0.1388	1	0.219237	1.38629	2.63906	C34	通用设备制造业	江西省	360000	景德镇市	360200
404	2018	0.159851	15.9851	3	2.63906	0.0304379	9.09	0	0	1.06	0.1559	1	0.063575	0	3.13549	C34	通用设备制造业	江西省	360000	景德镇市	360200
404	2019	0.164605	16.4605	3	2.30259	0.0290846	7.3	0	0	1.12	0.1506	1	0.011148	1.09861	3.21888	C34	通用设备制造业	江西省	360000	景德镇市	360200
404	2020	0.177804	17.7804	2	2.30259	0.0253597	6.91	0.693147	2.17391	1.01	0.1348	1	0.036274	0.693147	3.85015	C34	通用设备制造业	江西省	360000	景德镇市	360200
404	2021	0.131724	13.1724	1	1.94591	0.024299	7.31	0	0	1.03	0.124	1	0.045921	0.693147	2.99573	C34	通用设备制造业	江西省	360000	景德镇市	360200
404	2022	0.137133	13.7133	2	1.38629	0.0219551	9.93	0	0	1.16	0.1216	1	0.057608	0.693147	2.77259	C34	通用设备制造业	江西省	360000	景德镇市	360200
404	2023	0.0582245	5.82245	1	2.30259	0.0146613	4.86	0	0	1.06	0.1014	0	0.063169	0.693147	2.48491	C34	通用设备制造业	江西省	360000	景德镇市	360200
407	2012	0.0280826	2.80826	1	0	0.0588209	0	0	0	4.77	0.2524	0	-0.062381	1.09861	0	C26	化学原料及化学制品制造业	山东省	370000	济南市	370100
407	2013	0.0462737	4.62737	2	0	0.0538042	0	0	0	6.24	0.2302	0	0.019682	0.693147	1.38629	C26	化学原料及化学制品制造业	山东省	370000	济南市	370100
407	2014	0.025877	2.5877	1	0	0.0456045	0	0	0	4.77	0.1043	0	0.480539	0.693147	1.09861	C26	化学原料及化学制品制造业	山东省	370000	济南市	370100
407	2015	0.0197642	1.97642	1	0.693147	0.0465121	0	0	0	3.19	0	0	0.036337	0.693147	0	C26	化学原料及化学制品制造业	山东省	370000	济南市	370100
408	2017	0.041448	4.1448	1	0	0.045848	0	0	0	0.34	0.4222	0	0.091286	2.56495	0	C26	化学原料及化学制品制造业	青海省	630000	格尔木市	632801
408	2018	0.0379634	3.79634	1	0	0.0347121	0.68	0	0	0.3509	0.3368	0	0.137776	2.56495	0	C26	化学原料及化学制品制造业	青海省	630000	格尔木市	632801
408	2019	0.0376316	3.76316	1	0	0.0320666	1.65	0	0	0.41	0.3922	0	0.059757	2.19722	0	C26	化学原料及化学制品制造业	青海省	630000	格尔木市	632801
408	2021	0.108695	10.8695	1	0	0.0348627	2.58	0	0	0.97	0.3047	1	0.194093	2.48491	0	C26	化学原料及化学制品制造业	青海省	630000	格尔木市	632801
408	2022	0.110305	11.0305	1	0	0.0262112	4.8	0	0	1.21	0.2108	1	0.282417	2.94444	0	C26	化学原料及化学制品制造业	青海省	630000	格尔木市	632801
408	2023	0.148752	14.8752	4	0.693147	0.0232844	4.61	0	0	2.01	0.2031	1	0.076416	2.56495	0	C26	化学原料及化学制品制造业	青海省	630000	格尔木市	632801
410	2011	0.0288336	2.88336	1	0	0.0377556	0	0	0	3.4	0.116	0	0.051005	0	2.56495	C34	通用设备制造业	辽宁省	210000	沈阳市	210100
410	2012	0.0382651	3.82651	1	1.09861	0.0447816	0	0	0	4.39	0.1002	0	0.004348	0	2.07944	C34	通用设备制造业	辽宁省	210000	沈阳市	210100
410	2013	0.0318687	3.18687	1	0	0.0465922	0	0	0	4.7502	0.1274	0	0.665271	0	2.63906	C34	通用设备制造业	辽宁省	210000	沈阳市	210100
410	2014	0.0636687	6.36686	1	0	0.0456742	0	0.693147	4.34783	4.64	0.0949	0	0.006962	0	3.17805	C34	通用设备制造业	辽宁省	210000	沈阳市	210100
410	2015	0.028339	2.8339	1	0	0.0490708	8.21	0	0	4.31	0.0821	0	-0.17612	0	1.60944	C34	通用设备制造业	辽宁省	210000	沈阳市	210100
410	2016	0.0317958	3.17958	1	0	0.0437937	8.82	0	0	4.04	0.1138	0	-0.63527	0	1.94591	C34	通用设备制造业	辽宁省	210000	沈阳市	210100
410	2018	0.0502024	5.02024	1	1.09861	0.0395966	8.76	0	0	4.22	0.1677	0	-0.852934	0	2.56495	C34	通用设备制造业	辽宁省	210000	沈阳市	210100
410	2023	0.0813245	8.13245	3	1.38629	0.0377791	7.92	0	0	4.3	0.2181	0	0.014695	0	3.13549	C34	通用设备制造业	辽宁省	210000	沈阳市	210100
413	2011	0.0132367	1.32367	1	0	0.0307349	0	0	0	0	0.1414	0	0.089372	0.693147	0	C39	计算机、通信和其他电子设备制造业	河北省	130000	石家庄市	130100
413	2012	0.0079724	1.22037	1	0	0.0282512	0	0	0	4.69	0.0244	0	0.937274	0	0	C39	计算机、通信和其他电子设备制造业	河北省	130000	石家庄市	130100
413	2013	0.0067626	1.22037	1	0	0.0124862	0	0	0	4.4646	0.0156	0	10.6704	0	0	C39	计算机、通信和其他电子设备制造业	河北省	130000	石家庄市	130100
413	2014	0.0840708	8.40708	1	0	0.0176967	0	0	0	5.5	0.1571	1	0.102414	0	0	C39	计算机、通信和其他电子设备制造业	河北省	130000	石家庄市	130100
413	2015	0.087915	8.7915	1	0	0.0160525	7.72	0	0	1.19	0.2396	1	0.564017	0	0	C39	计算机、通信和其他电子设备制造业	河北省	130000	石家庄市	130100
413	2016	0.0877134	8.77134	1	0	0.0123476	12.23	0	0	0	0.1912	1	0.584268	0	0	C39	计算机、通信和其他电子设备制造业	河北省	130000	石家庄市	130100
413	2017	0.124458	12.4458	3	0.693147	0.0144272	17.61	0	0	3.25	0.1639	1	0.314939	0	0	C39	计算机、通信和其他电子设备制造业	河北省	130000	石家庄市	130100
413	2018	0.129483	12.9483	1	1.79176	0.0158034	21.98	0	0	3.16	0.1327	1	0.038981	1.60944	0	C39	计算机、通信和其他电子设备制造业	河北省	130000	石家庄市	130100
413	2019	0.124969	12.4969	1	0.693147	0.0214553	21.43	0	0	3.83	0.1404	1	-0.057078	1.79176	0.693147	C39	计算机、通信和其他电子设备制造业	河北省	130000	石家庄市	130100
413	2020	0.0852361	8.52361	1	1.94591	0.0635821	18.52	0	0	2.17	0.1463	0	-0.09208	1.60944	3.52636	C39	计算机、通信和其他电子设备制造业	河北省	130000	石家庄市	130100
413	2021	0.17413	17.413	3	1.79176	0.0592602	16.82	1.79176	7.8125	1.56	0.1181	0	-0.095955	1.38629	4.17439	C39	计算机、通信和其他电子设备制造业	河北省	130000	石家庄市	130100
413	2022	0.127837	12.7837	3	1.79176	0.0574687	15.42	0.693147	4.7619	1.38	0.1428	0	-0.086425	1.38629	3.09104	C39	计算机、通信和其他电子设备制造业	河北省	130000	石家庄市	130100
420	2011	0.0230145	2.30145	1	0	0.0703167	0	0	0	0	0.4831	0	-0.341535	0	0	C28	化学纤维制造业	吉林省	220000	吉林市	220200
420	2013	0.0449612	4.49612	1	0	0.072754	0	0	0	0	0.3419	0	-0.71474	2.63906	0.693147	C28	化学纤维制造业	吉林省	220000	吉林市	220200
420	2014	0.0437932	4.37932	1	0	0.0416819	0	0	0	0	0.4739	0	4.92797	2.07944	0.693147	C28	化学纤维制造业	吉林省	220000	吉林市	220200
420	2015	0.0408836	4.08836	1	0	0.0445086	0	0	0	0	0.4763	0	-0.049524	1.38629	1.09861	C28	化学纤维制造业	吉林省	220000	吉林市	220200
420	2016	0.0381463	3.81463	1	0	0.0249226	0	0	0	0	0.3334	0	1.76703	1.60944	1.38629	C28	化学纤维制造业	吉林省	220000	吉林市	220200
420	2017	0.0325048	3.25048	1	0	0.0370091	0	0	0	0	0.4487	0	0.032254	0	1.79176	C28	化学纤维制造业	吉林省	220000	吉林市	220200
420	2018	0.024453	2.4453	1	0	0.035835	0	0	0	0.21	0.4132	0	0.050129	0.693147	0	C28	化学纤维制造业	吉林省	220000	吉林市	220200
420	2019	0.034862	3.4862	1	0	0.0288321	0	0	0	0.16	0.5643	0	0.034237	0.693147	0.693147	C28	化学纤维制造业	吉林省	220000	吉林市	220200
420	2020	0.0374942	3.74942	1	0	0.0268006	0	0	0	0.15	0.522	0	0.030779	1.79176	0	C28	化学纤维制造业	吉林省	220000	吉林市	220200
420	2021	0.0575247	5.75247	2	0.693147	0.0252213	0	0	0	0	0.5987	0	-0.049599	1.60944	0	C28	化学纤维制造业	吉林省	220000	吉林市	220200
420	2022	0.0582987	5.82987	2	0.693147	0.0202462	0	0	0	0	0.5524	0	0.464114	1.94591	0	C28	化学纤维制造业	吉林省	220000	吉林市	220200
420	2023	0.0504823	5.04823	2	0	0.0227607	0	0	0	0	0.5758	0	0.007432	1.79176	0	C28	化学纤维制造业	吉林省	220000	吉林市	220200
422	2011	0.126581	12.6581	3	0	0.0204995	0	0	0	1.86	0.4179	1	0.369218	1.60944	0	C26	化学原料及化学制品制造业	湖北省	420000	宜昌市	420500
422	2012	0.149352	14.9352	4	0	0.0214181	0	0	0	2.41	0.422	1	0.113636	1.94591	1.09861	C26	化学原料及化学制品制造业	湖北省	420000	宜昌市	420500
422	2013	0.288611	28.8611	4	0	0.0200127	0	1.38629	42.8571	0.7064	0.5554	1	-0.050574	1.38629	2.07944	C26	化学原料及化学制品制造业	湖北省	420000	宜昌市	420500
422	2014	0.277285	27.7285	4	0	0.0177011	0	0.693147	50	0.73	0.5067	1	0.007289	1.60944	1.09861	C26	化学原料及化学制品制造业	湖北省	420000	宜昌市	420500
422	2015	0.178988	17.8988	1	0	0.0167999	8.09	0.693147	20	0	0.487	1	0.073161	0.693147	1.79176	C26	化学原料及化学制品制造业	湖北省	420000	宜昌市	420500
422	2016	0.35642	35.642	1	0.693147	0.0172201	9.3	0.693147	100	0	0.5198	1	-0.156527	0.693147	0.693147	C26	化学原料及化学制品制造业	湖北省	420000	宜昌市	420500
422	2017	0.134051	13.4051	2	0.693147	0.0197904	7.72	0.693147	14.2857	0	0.6304	0	-0.770361	2.07944	2.07944	C26	化学原料及化学制品制造业	湖北省	420000	宜昌市	420500
422	2021	0.0612133	6.12133	2	0	0.0129271	7.5	0	0	0.21	0.4084	0	1.95379	3.21888	0	C26	化学原料及化学制品制造业	湖北省	420000	宜昌市	420500
422	2022	0.259285	25.9285	2	0	0.0231842	10	1.60944	28.5714	0.44	0.4218	1	0.715729	2.77259	2.70805	C26	化学原料及化学制品制造业	湖北省	420000	宜昌市	420500
422	2023	0.149952	14.9952	2	0	0.0215274	10.94	1.09861	20	0.76	0.3647	0	0.271428	2.56495	2.3979	C26	化学原料及化学制品制造业	湖北省	420000	宜昌市	420500
423	2011	0.138044	13.8044	3	1.38629	0.0346216	3.11	0	0	1.29	0.1115	1	0.233456	0	2.77259	C27	医药制造业	山东省	370000	聊城市	371500
423	2012	0.13496	13.496	3	1.38629	0.0284777	0	0	0	1.33	0.0981	1	0.240597	0	2.77259	C27	医药制造业	山东省	370000	聊城市	371500
423	2013	0.13211	13.211	2	2.70805	0.0307986	0	0	0	1.7649	0.1072	1	0.179318	0	1.79176	C27	医药制造业	山东省	370000	聊城市	371500
423	2014	0.166673	16.6673	3	2.77259	0.0310148	0	0	0	2.2592	0.1778	1	0.185539	0	4.49981	C27	医药制造业	山东省	370000	聊城市	371500
423	2015	0.144575	14.4575	2	1.94591	0.0231183	7.8	0	0	2.66	0.1583	1	0.175094	0	3.55535	C27	医药制造业	山东省	370000	聊城市	371500
423	2016	0.147578	14.7578	2	1.79176	0.0184665	7.65	0	0	4.2815	0.1425	1	0.183977	0	4.09434	C27	医药制造业	山东省	370000	聊城市	371500
423	2017	0.150702	15.0702	1	1.94591	0.0265704	7.89	0	0	5.23	0.1381	1	0.177123	1.38629	4.00733	C27	医药制造业	山东省	370000	聊城市	371500
423	2018	0.151146	15.1146	1	1.94591	0.0303728	7.9	0	0	5.03	0.125	1	0.147647	1.38629	4.14314	C27	医药制造业	山东省	370000	聊城市	371500
423	2019	0.177847	17.7847	2	2.83321	0.0363971	8.72	0	0	4.2	0.185	1	-0.115274	1.60944	4.35671	C27	医药制造业	山东省	370000	聊城市	371500
423	2020	0.171664	17.1664	2	2.89037	0.0403663	8.38	0	0	4.1	0.2032	1	-0.025121	1.38629	3.58352	C27	医药制造业	山东省	370000	聊城市	371500
423	2021	0.160699	16.0699	2	2.77259	0.0351749	7.2	0	0	3.97	0.1774	1	0.022334	1.09861	2.89037	C27	医药制造业	山东省	370000	聊城市	371500
423	2022	0.150299	15.0298	2	2.30259	0.0262881	8.4	0	0	4.37	0.1554	1	0.035558	0.693147	2.63906	C27	医药制造业	山东省	370000	聊城市	371500
423	2023	0.190055	19.0055	6	1.94591	0.0242369	8.78	0	0	5.65	0.1381	1	0.037656	0.693147	2.30259	C27	医药制造业	山东省	370000	聊城市	371500
425	2011	0.119885	11.9885	3	0	0.0381921	0	0	0	0	0.074	1	0.238884	1.38629	1.38629	C35	专用设备制造业	江苏省	320000	徐州市	320300
425	2012	0.164276	16.4276	3	0	0.042267	0	0.693147	1.5625	9.33	0.1293	1	0.156265	0	4.17439	C35	专用设备制造业	江苏省	320000	徐州市	320300
425	2013	0.148987	14.8987	2	0.693147	0.0438277	0	0	0	10.3855	0.1248	1	0.123099	0.693147	4.84419	C35	专用设备制造业	江苏省	320000	徐州市	320300
425	2014	0.200665	20.0665	1	0	0.044788	0	2.19722	3.4632	10.1	0.1677	1	0.026608	0	5.44674	C35	专用设备制造业	江苏省	320000	徐州市	320300
425	2015	0.231689	23.1689	1	0.693147	0.0350671	14.97	2.63906	3.7464	8.37	0.1411	1	0.008082	0	5.8522	C35	专用设备制造业	江苏省	320000	徐州市	320300
425	2016	0.243215	24.3215	2	1.60944	0.0413973	15.94	2.30259	3.26087	8.68	0.1716	1	-0.006977	0	5.62402	C35	专用设备制造业	江苏省	320000	徐州市	320300
425	2017	0.141661	14.1661	2	2.77259	0.0398454	15.87	0.693147	0.478469	8.73	0.1445	0	0.174508	1.38629	5.34711	C35	专用设备制造业	江苏省	320000	徐州市	320300
425	2018	0.189705	18.9705	2	3.49651	0.0359553	16.55	1.94591	1.45631	9.14	0.1172	0	0.261256	1.09861	6.02345	C35	专用设备制造业	江苏省	320000	徐州市	320300
425	2019	0.255029	25.5029	2	3.80666	0.0310123	17.97	1.60944	1.48148	10.47	0.0983	1	0.108953	1.38629	5.60212	C35	专用设备制造业	江苏省	320000	徐州市	320300
425	2020	0.260514	26.0514	3	3.61092	0.0271633	18.55	1.60944	3.57143	11.06	0.0868	1	0.015588	1.09861	4.72739	C35	专用设备制造业	江苏省	320000	徐州市	320300
425	2021	0.247628	24.7628	2	3.46574	0.0283535	18.88	1.38629	10.7143	11.41	0.0782	1	0.087751	1.09861	3.3673	C35	专用设备制造业	江苏省	320000	徐州市	320300
425	2022	0.227101	22.71	2	2.94444	0.0368012	21	1.09861	6.89655	12.99	0.1083	1	0.035409	0.693147	3.4012	C35	专用设备制造业	江苏省	320000	徐州市	320300
425	2023	0.127901	12.7901	2	3.55535	0.0455182	24.2	0	0	12.99	0.139	0	0.051687	1.38629	3.61092	C35	专用设备制造业	江苏省	320000	徐州市	320300
510	2011	0.0487261	4.87261	1	0	0.0432803	0	0	0	0	0.5898	0	-0.04997	1.79176	1.09861	C26	化学原料及化学制品制造业	四川省	510000	德阳市	510600
510	2012	0.0474382	4.74382	2	0	0.0335882	0	0	0	0	0.5952	0	0.01029	0.693147	0.693147	C26	化学原料及化学制品制造业	四川省	510000	德阳市	510600
510	2013	0.0290651	2.90651	1	0	0.0395546	0	0	0	0	0.6813	0	-0.166426	0	0	C26	化学原料及化学制品制造业	四川省	510000	德阳市	510600
510	2014	0.0268982	2.68982	1	0	0.0392699	0	0	0	0	0.6266	0	-0.155773	0	0	C26	化学原料及化学制品制造业	四川省	510000	德阳市	510600
510	2016	0.0372095	3.72095	1	0	0.0472978	2	0	0	0	0.715	0	0.064756	0	0.693147	C26	化学原料及化学制品制造业	四川省	510000	德阳市	510600
510	2017	0.0334915	3.34915	1	0	0.0406101	2.2	0	0	0	0.6017	0	0.034107	0.693147	0	C26	化学原料及化学制品制造业	四川省	510000	德阳市	510600
510	2018	0.0442432	4.42432	2	0	0.0431069	2.6	0	0	0	0.5774	0	0.090493	0.693147	0	C26	化学原料及化学制品制造业	四川省	510000	德阳市	510600
510	2019	0.0242323	2.42323	1	0	0.0380341	2.7	0	0	0.36	0.5002	0	0.098996	0	0	C26	化学原料及化学制品制造业	四川省	510000	德阳市	510600
510	2020	0.0305399	3.05399	1	0	0.0321481	2.8	0	0	0.49	0.5136	0	0.042633	0.693147	0	C26	化学原料及化学制品制造业	四川省	510000	德阳市	510600
510	2021	0.0545178	5.45178	2	0.693147	0.0255588	2.8	0	0	0.58	0.4531	0	0.244175	1.60944	0	C26	化学原料及化学制品制造业	四川省	510000	德阳市	510600
510	2022	0.120432	12.0432	2	0	0.0267786	2.9	0	0	0.71	0.4465	1	0.071359	1.94591	0	C26	化学原料及化学制品制造业	四川省	510000	德阳市	510600
510	2023	0.0400243	4.00243	1	0	0.0696711	3.2	0	0	0.71	0.4159	0	-0.090734	1.94591	0	C26	化学原料及化学制品制造业	四川省	510000	德阳市	510600
513	2011	0.0314497	3.14497	1	0	0.0370169	0	0	0	2.6	0.2369	0	0.141131	0	2.3979	C27	医药制造业	广东省	440000	珠海市	440400
513	2012	0.0400665	4.00666	1	0	0.0364108	0	0	0	3.22	0.2001	0	0.05595	0.693147	2.89037	C27	医药制造业	广东省	440000	珠海市	440400
513	2013	0.126379	12.6379	2	0	0.0341938	0	0	0	4.4879	0.3011	1	0.133454	0.693147	2.77259	C27	医药制造业	广东省	440000	珠海市	440400
513	2014	0.136866	13.6866	2	1.09861	0.0353676	0	0	0	4.4012	0.4031	1	0.132584	0	2.83321	C27	医药制造业	广东省	440000	珠海市	440400
513	2015	0.144102	14.4102	1	2.07944	0.0321229	6.31	0	0	4.45	0.4115	1	0.178197	1.09861	1.94591	C27	医药制造业	广东省	440000	珠海市	440400
513	2016	0.154071	15.4071	2	1.60944	0.0283879	5.65	0	0	4.35	0.3173	1	0.477295	1.38629	2.77259	C27	医药制造业	广东省	440000	珠海市	440400
513	2017	0.14593	14.593	1	1.60944	0.0165938	8.42	0	0	5.1845	0.2089	1	0.580945	2.56495	2.07944	C27	医药制造业	广东省	440000	珠海市	440400
513	2018	0.163415	16.3415	2	1.60944	0.014004	9.4	0	0	6.01	0.1845	1	0.045956	2.70805	2.70805	C27	医药制造业	广东省	440000	珠海市	440400
513	2019	0.142883	14.2883	1	1.60944	0.01277	8.08	0	0	5	0.1758	1	0.044712	2.83321	1.60944	C27	医药制造业	广东省	440000	珠海市	440400
513	2020	0.168848	16.8848	3	1.94591	0.0114823	10.89	0	0	5.94	0.1604	1	0.111187	2.94444	1.09861	C27	医药制造业	广东省	440000	珠海市	440400
513	2021	0.189966	18.9966	4	1.94591	0.0116342	10.91	0	0	5.7	0.164	1	0.049189	3.29584	2.07944	C27	医药制造业	广东省	440000	珠海市	440400
513	2022	0.19628	19.628	5	2.07944	0.0224187	10.81	0	0	5.59	0.1596	1	0.043688	3.33221	1.09861	C27	医药制造业	广东省	440000	珠海市	440400
513	2023	0.122862	12.2862	4	2.07944	0.0170208	10.14	0	0	6.17	0.1715	0	-0.011354	3.3673	2.19722	C27	医药制造业	广东省	440000	珠海市	440400
518	2011	0.0348489	3.48489	1	0	0.177704	0	0	0	0	0.2317	0	0.040966	0	2.19722	C27	医药制造业	江苏省	320000	江阴市	320281
518	2012	0.0558955	5.58955	1	0	0.177109	0	0	0	0	0.2449	0	-0.093386	0.693147	4.26268	C27	医药制造业	江苏省	320000	江阴市	320281
518	2013	0.0502174	5.02174	1	0.693147	0.119142	0	0	0	0	0	0	-0.119802	0.693147	4.21951	C27	医药制造业	江苏省	320000	江阴市	320281
518	2014	0.0261013	2.61013	1	0.693147	0.124663	0	0	0	0	0	0	-0.01257	0	1.60944	C27	医药制造业	江苏省	320000	江阴市	320281
518	2015	0.0040516	1.22037	1	0	0.0708225	0	0	0	0	0	0	-0.156464	0	0	C27	医药制造业	江苏省	320000	江阴市	320281
518	2016	0.003905	1.22037	1	0	0.0681611	0	0	0	0	0	0	0.003954	0	0	C27	医药制造业	江苏省	320000	江阴市	320281
518	2017	0.0087145	1.22037	1	0	0.0489898	0	0	0	0	0	0	0.105466	0.693147	0	C27	医药制造业	江苏省	320000	江阴市	320281
518	2018	0.0102557	1.22037	1	0	0.043161	2.59	0	0	0	0	0	-0.048469	0.693147	0	C27	医药制造业	江苏省	320000	江阴市	320281
518	2019	0.0100058	1.22037	1	0	0.0379599	2.65	0	0	0	0	0	0.027244	0.693147	0	C27	医药制造业	江苏省	320000	江阴市	320281
518	2020	0.0263895	2.63895	1	0.693147	0.0352418	5.56	0	0	0	0.0871	0	0.037458	1.09861	0	C27	医药制造业	江苏省	320000	江阴市	320281
518	2021	0.0218578	2.18578	1	0	0.0291624	11.02	0	0	0	0.0722	0	-0.055867	1.09861	0	C27	医药制造业	江苏省	320000	江阴市	320281
518	2022	0.0290165	2.90165	1	0.693147	0.0420901	14.35	0	0	0	0.0698	0	-0.082379	0.693147	0	C27	医药制造业	江苏省	320000	江阴市	320281
518	2023	0.0346726	3.46726	1	1.09861	0.0453989	15.49	0	0	0	0.0755	0	-0.135999	0.693147	0	C27	医药制造业	江苏省	320000	江阴市	320281
519	2011	0.0231258	2.31258	1	0	0.0360882	0	0	0	0	0.2848	0	-0.031129	0	1.38629	C34	通用设备制造业	湖南省	430000	湘潭市	430300
519	2012	0.0187865	1.87865	1	0	0.0357104	0	0	0	0	0.2754	0	0.009957	0.693147	0	C34	通用设备制造业	湖南省	430000	湘潭市	430300
519	2017	0.108576	10.8575	1	0	0.0582949	13.88	0	0	0.93	0.2502	1	0.022169	1.60944	0	C35	专用设备制造业	湖南省	430000	湘潭市	430300
519	2018	0.0465584	4.65584	1	0	0.0528843	18.7	0	0	1.04	0.2132	0	0.044433	2.3979	0	C35	专用设备制造业	湖南省	430000	湘潭市	430300
519	2019	0.031184	3.1184	1	0	0.0480146	18.21	0	0	1.27	0.2004	0	0.041496	0.693147	0	C35	专用设备制造业	湖南省	430000	湘潭市	430300
519	2020	0.0430509	4.30509	2	0	0.042184	18.82	0	0	1.5	0.206	0	0.040231	0.693147	0	C35	专用设备制造业	湖南省	430000	湘潭市	430300
519	2021	0.0596107	5.96107	2	0	0.0351206	19.6	0	0	2.76	0.1988	0	0.05793	2.48491	0	C35	专用设备制造业	湖南省	430000	湘潭市	430300
519	2022	0.046456	4.6456	2	0	0.0313711	21.8	0	0	3.34	0.1999	0	0.082212	0.693147	0	C35	专用设备制造业	湖南省	430000	湘潭市	430300
519	2023	0.0504768	5.04768	2	0	0.028906	25.17	0	0	4.34	0.2146	0	0.079664	0.693147	0	C35	专用设备制造业	湖南省	430000	湘潭市	430300
521	2011	0.126441	12.6441	2	0.693147	0.0853212	0	0	0	1.63	0.1231	1	0.039344	0	3.58352	C38	电气机械及器材制造业	安徽省	340000	合肥市	340100
521	2012	0.165675	16.5675	4	1.09861	0.0796676	0	0	0	0.53	0.1577	1	0.044577	0.693147	4.51086	C38	电气机械及器材制造业	安徽省	340000	合肥市	340100
521	2013	0.182092	18.2092	4	2.56495	0.0695896	0	0	0	0.6261	0.1336	1	0.075889	0.693147	4.77069	C38	电气机械及器材制造业	安徽省	340000	合肥市	340100
521	2014	0.168589	16.8589	4	1.94591	0.0623669	0	0	0	0.65	0.1358	1	0.071905	0	4.69135	C38	电气机械及器材制造业	安徽省	340000	合肥市	340100
521	2015	0.179133	17.9133	3	3.29584	0.063757	10.68	0	0	0.6	0.1347	1	-0.0054	0	4.60517	C38	电气机械及器材制造业	安徽省	340000	合肥市	340100
521	2016	0.202655	20.2655	3	3.33221	0.0490878	10.85	0.693147	0.568182	0.7065	0.0963	1	0.471119	0	5.17615	C38	电气机械及器材制造业	安徽省	340000	合肥市	340100
521	2017	0.21838	21.838	3	3.2581	0.0484198	14.29	0.693147	0.520833	0.82	0.0902	1	-0.001724	1.60944	5.26269	C38	电气机械及器材制造业	安徽省	340000	合肥市	340100
521	2018	0.186289	18.6289	2	3.17805	0.0525376	15.52	0	0	0.9	0.1114	1	-0.004193	1.60944	5.1299	C38	电气机械及器材制造业	安徽省	340000	合肥市	340100
521	2019	0.226533	22.6533	2	3.09104	0.0657114	16.62	1.09861	0.598802	1.13	0.1535	1	-0.004591	1.60944	5.81413	C38	电气机械及器材制造业	安徽省	340000	合肥市	340100
521	2020	0.209286	20.9286	2	2.70805	0.0581774	19.62	0.693147	0.31746	1.09	0.1485	1	-0.029319	1.38629	5.75574	C38	电气机械及器材制造业	安徽省	340000	合肥市	340100
521	2021	0.241988	24.1988	3	3.13549	0.0627632	13.04	1.38629	1.03806	1.33	0.1516	1	0.006589	1.38629	5.66988	C38	电气机械及器材制造业	安徽省	340000	合肥市	340100
521	2022	0.23853	23.853	3	2.94444	0.0555894	15.07	1.09861	0.558659	1.34	0.1376	1	0.108962	2.07944	5.88332	C38	电气机械及器材制造业	安徽省	340000	合肥市	340100
521	2023	0.121827	12.1827	3	1.94591	0.0457134	15.07	0	0	1.16	0.1102	0	0.118216	2.19722	5.65599	C38	电气机械及器材制造业	安徽省	340000	合肥市	340100
523	2011	0.123129	12.3129	3	0.693147	0.0274149	0	0	0	0	0.0935	1	1.08569	1.09861	1.09861	C26	化学原料及化学制品制造业	广东省	440000	广州市	440100
523	2012	0.135497	13.5497	3	1.09861	0.032782	0	0	0	1.03	0.0714	1	0.021023	1.38629	1.79176	C26	化学原料及化学制品制造业	广东省	440000	广州市	440100
523	2013	0.159925	15.9925	3	2.56495	0.0235276	0	0	0	1.0825	0.1978	1	0.02897	1.60944	2.07944	C26	化学原料及化学制品制造业	广东省	440000	广州市	440100
523	2014	0.162596	16.2596	3	2.83321	0.0189201	0	0	0	0.8522	0.1519	1	0.031303	1.38629	2.63906	C26	化学原料及化学制品制造业	广东省	440000	广州市	440100
523	2015	0.168048	16.8048	3	1.94591	0.016098	22	0	0	1.61	0.1265	1	0.023533	1.38629	2.56495	C26	化学原料及化学制品制造业	广东省	440000	广州市	440100
523	2016	0.168621	16.8621	3	2.83321	0.0140152	21	0	0	2.98	0.1112	1	0.620609	1.09861	1.60944	C26	化学原料及化学制品制造业	广东省	440000	广州市	440100
523	2017	0.189627	18.9627	4	2.07944	0.0120449	21.09	0	0	3.65	0.0909	1	0.030768	1.94591	3.13549	C26	化学原料及化学制品制造业	广东省	440000	广州市	440100
523	2018	0.171058	17.1058	4	1.09861	0.0089925	18.23	0	0	3.72	0.0668	1	-0.089798	1.38629	3.13549	C26	化学原料及化学制品制造业	广东省	440000	广州市	440100
523	2019	0.166753	16.6753	4	1.09861	0.0099841	16.76	0	0	2.75	0.0815	1	-0.252436	1.09861	3.09104	C26	化学原料及化学制品制造业	广东省	440000	广州市	440100
523	2022	0.0780429	7.80429	2	1.38629	0.0240675	11.73	0	0	1.9	0.3159	0	-0.051164	0.693147	2.99573	C26	化学原料及化学制品制造业	广东省	440000	广州市	440100
523	2023	0.0572491	5.72491	3	1.60944	0.0051886	9.54	0	0	4.0936	0.1334	0	0.205029	0	0	C26	化学原料及化学制品制造业	广东省	440000	广州市	440100
525	2011	0.0442113	4.42113	1	0.693147	0.0443236	0	0	0	0	0.2522	0	2.98469	2.83321	0	C26	化学原料及化学制品制造业	江苏省	320000	南京市	320100
525	2012	0.0633698	6.33698	3	0	0.0363548	0	0	0	5.34	0.1929	0	0.095863	2.94444	0	C26	化学原料及化学制品制造业	江苏省	320000	南京市	320100
525	2013	0.0686892	6.86892	3	0	0.035727	0	0	0	5.3558	0.2448	0	0.017635	3.33221	0	C26	化学原料及化学制品制造业	江苏省	320000	南京市	320100
525	2014	0.34391	34.391	3	0	0.0372665	0	1.60944	100	5.49	0.2765	0	0.113899	2.94444	1.60944	C26	化学原料及化学制品制造业	江苏省	320000	南京市	320100
525	2015	0.45066	36.9914	3	2.70805	0.0505028	24.94	1.09861	100	6.7	0.3862	1	0.004487	2.99573	1.09861	C26	化学原料及化学制品制造业	江苏省	320000	南京市	320100
525	2016	0.133938	13.3938	1	0	0.0432174	24.18	0	0	6.79	0.2923	1	0.216832	2.83321	0	C26	化学原料及化学制品制造业	江苏省	320000	南京市	320100
525	2017	0.15449	15.449	1	1.94591	0.0376588	23.18	0	0	6.69	0.3321	1	0.140491	2.70805	0	C26	化学原料及化学制品制造业	江苏省	320000	南京市	320100
525	2018	0.157631	15.7631	2	1.09861	0.0425658	22.53	0	0	6.72	0.2914	1	0.074576	3.04452	0	C26	化学原料及化学制品制造业	江苏省	320000	南京市	320100
525	2019	0.17128	17.128	3	1.79176	0.0448145	21.12	0	0	6.51	0.2614	1	-0.050044	2.70805	0	C26	化学原料及化学制品制造业	江苏省	320000	南京市	320100
525	2020	0.182056	18.2056	4	1.79176	0.0513152	20.38	0	0	5.92	0.3184	1	-0.105398	2.48491	0	C26	化学原料及化学制品制造业	江苏省	320000	南京市	320100
528	2011	0.141848	14.1849	3	0	0.0321053	0	0	0	2.81	0.0958	1	0.103655	1.60944	3.68888	C35	专用设备制造业	广西壮族自治区	450000	柳州市	450200
528	2012	0.116188	11.6188	2	0	0.0359915	0	0	0	3.1	0.1161	1	-0.001478	0	3.4012	C35	专用设备制造业	广西壮族自治区	450000	柳州市	450200
528	2013	0.12818	12.818	2	0	0.0373519	0	0	0	3.6107	0.1388	1	0.004281	1.09861	3.55535	C35	专用设备制造业	广西壮族自治区	450000	柳州市	450200
528	2014	0.206353	20.6353	3	1.09861	0.033353	0	1.38629	5.26316	4.29	0.1242	1	-0.016549	1.09861	4.06044	C35	专用设备制造业	广西壮族自治区	450000	柳州市	450200
528	2015	0.15879	15.879	3	0.693147	0.0318973	11.9	0	0	4.63	0.1191	1	-0.024062	1.09861	3.98898	C35	专用设备制造业	广西壮族自治区	450000	柳州市	450200
528	2016	0.18678	18.678	3	0	0.0331174	10	1.09861	2.5	4.9399	0.1198	1	-0.006633	0.693147	4.39445	C35	专用设备制造业	广西壮族自治区	450000	柳州市	450200
528	2017	0.187521	18.7521	2	1.09861	0.0308234	10.12	1.09861	2	4.79	0.1143	1	0.030475	0.693147	4.61512	C35	专用设备制造业	广西壮族自治区	450000	柳州市	450200
528	2018	0.160156	16.0156	2	1.38629	0.0296524	10.28	0	0	4.65	0.104	1	0.009394	1.60944	4.35671	C35	专用设备制造业	广西壮族自治区	450000	柳州市	450200
528	2019	0.163503	16.3503	2	1.79176	0.0264549	10.66	0	0	5.47	0.0965	1	0.072594	1.38629	4.36945	C35	专用设备制造业	广西壮族自治区	450000	柳州市	450200
528	2020	0.212209	21.2209	4	2.07944	0.0282953	10.04	0.693147	1.21951	4.4	0.0902	1	0.099928	1.60944	4.41884	C35	专用设备制造业	广西壮族自治区	450000	柳州市	450200
528	2021	0.189943	18.9943	3	2.83321	0.0309888	10.39	0	0	5.18	0.1064	1	0.031014	1.94591	4.21951	C35	专用设备制造业	广西壮族自治区	450000	柳州市	450200
528	2022	0.236131	23.6131	2	1.94591	0.0358468	9.59	1.94591	5.76923	5.34	0.116	1	0.062577	1.38629	4.65396	C35	专用设备制造业	广西壮族自治区	450000	柳州市	450200
528	2023	0.136473	13.6473	2	2.30259	0.0311595	11.76	1.09861	1.81818	5.5	0.1314	0	0.04785	1.09861	4.70953	C35	专用设备制造业	广西壮族自治区	450000	柳州市	450200
530	2011	0.0213142	2.13142	1	0	0.0552625	0	0	0	0	0.1132	0	0.015259	1.60944	0	C34	通用设备制造业	辽宁省	210000	大连市	210200
530	2012	0.0236142	2.36142	1	0	0.0564465	0	0	0	2.77	0.1379	0	0.03446	1.38629	0	C34	通用设备制造业	辽宁省	210000	大连市	210200
530	2013	0.0252671	2.52671	1	0	0.0522986	0	0	0	2.9163	0.1332	0	0.05197	0.693147	1.09861	C34	通用设备制造业	辽宁省	210000	大连市	210200
530	2014	0.0329726	3.29726	1	1.09861	0.0503984	0	0	0	3	0.1357	0	0.027152	1.09861	0	C34	通用设备制造业	辽宁省	210000	大连市	210200
530	2015	0.0553173	5.53173	2	0.693147	0.0388041	14	0	0	2.99	0.1102	0	0.315075	0	2.30259	C34	通用设备制造业	辽宁省	210000	大连市	210200
530	2016	0.121474	12.1474	1	0.693147	0.0310452	14.77	0	0	3.1983	0.1022	1	0.222383	1.09861	1.94591	C34	通用设备制造业	辽宁省	210000	大连市	210200
530	2017	0.16872	16.872	3	1.79176	0.02561	15.52	0	0	3.53	0.1585	1	0.036829	1.38629	2.99573	C34	通用设备制造业	辽宁省	210000	大连市	210200
530	2018	0.196452	19.6452	1	1.60944	0.0264029	15.71	1.09861	10	3.7	0.1712	1	-0.010411	1.09861	3.04452	C34	通用设备制造业	辽宁省	210000	大连市	210200
530	2019	0.12683	12.6829	1	2.07944	0.0256158	15.99	0.693147	12.5	3.98	0.1796	0	-0.001244	1.94591	2.19722	C34	通用设备制造业	辽宁省	210000	大连市	210200
530	2020	0.0475903	4.75903	1	1.09861	0.025599	10.77	0	0	3.02	0.1568	0	-0.001425	1.38629	0.693147	C34	通用设备制造业	辽宁省	210000	大连市	210200
530	2021	0.0518285	5.18285	1	0.693147	0.0248611	17.53	0	0	3.06	0.1491	0	-0.115884	1.09861	1.60944	C34	通用设备制造业	辽宁省	210000	大连市	210200
530	2022	0.104106	10.4106	1	0	0.0221097	14.18	0	0	3.34	0.1617	1	0.003532	1.38629	0	C34	通用设备制造业	辽宁省	210000	大连市	210200
530	2023	0.113904	11.3904	2	1.38629	0.0257942	12.95	0.693147	7.14286	3.34	0.1583	0	0.01433	1.38629	2.70805	C34	通用设备制造业	辽宁省	210000	大连市	210200
533	2011	0.01003	1.22037	1	0.693147	0.0025072	0	0	0	0.79	0.0356	0	0.052197	0	0	C38	电气机械及器材制造业	广东省	440000	佛山市	440600
533	2012	0.0320782	3.20782	2	1.09861	0.0156211	0	0	0	0.79	0.0283	0	0.073125	0.693147	0	C38	电气机械及器材制造业	广东省	440000	佛山市	440600
533	2013	0.0453125	4.53125	2	1.38629	0.11606	0	0	0	1.1177	0.0422	0	0.756007	1.09861	0	C38	电气机械及器材制造业	广东省	440000	佛山市	440600
533	2014	0.0421852	4.21852	2	1.09861	0.112426	0	0	0	1.09	0.049	0	0.047292	1.09861	0	C38	电气机械及器材制造业	广东省	440000	佛山市	440600
533	2015	0.115149	11.5149	1	1.94591	0.0806032	14	0	0	1.07	0.0377	1	0.049923	0.693147	0	C38	电气机械及器材制造业	广东省	440000	佛山市	440600
533	2016	0.119247	11.9247	2	1.09861	0.0825951	14.83	0	0	1.0923	0.0713	1	-0.026697	0.693147	0	C38	电气机械及器材制造业	广东省	440000	佛山市	440600
533	2017	0.110214	11.0214	1	1.09861	0.060249	15.62	0	0	1.29	0.0525	1	0.057217	1.09861	0	C38	电气机械及器材制造业	广东省	440000	佛山市	440600
533	2018	0.12842	12.842	2	0.693147	0.103644	19.55	0	0	1.51	0.0896	1	-0.568672	1.60944	0	C38	电气机械及器材制造业	广东省	440000	佛山市	440600
533	2019	0.115476	11.5476	1	0.693147	0.10659	23.25	0	0	1.4	0.088	1	-0.069141	1.09861	0	C38	电气机械及器材制造业	广东省	440000	佛山市	440600
533	2020	0.114952	11.4952	1	1.09861	0.100646	22.05	0	0	1.41	0.0803	1	0.087092	0.693147	0	C38	电气机械及器材制造业	广东省	440000	佛山市	440600
533	2021	0.122797	12.2797	1	1.09861	0.101057	24.92	0	0	1.36	0.078	1	-0.145501	1.38629	0	C38	电气机械及器材制造业	广东省	440000	佛山市	440600
533	2022	0.129821	12.9821	1	1.60944	0.0914984	28.05	0	0	1.44	0.0687	1	0.050611	1.38629	0	C38	电气机械及器材制造业	广东省	440000	佛山市	440600
533	2023	0.0560542	5.60542	1	1.94591	0.0854234	27.41	0	0	1.42	0.0655	0	0.075633	0.693147	0	C38	电气机械及器材制造业	广东省	440000	佛山市	440600
534	2019	0.113105	11.3105	1	0	0.0827424	24.74	0	0	11.15	0.182	1	-0.458915	0	0	C27	医药制造业	广东省	440000	汕头市	440500
534	2020	0.113447	11.3447	1	0	0.0918963	22.81	0	0	9.89	0.2492	1	0.04645	0	0	C27	医药制造业	广东省	440000	汕头市	440500
534	2021	0.12094	12.0939	1	0.693147	0.115095	21	0	0	8.29	0.2938	1	0.108654	0	0	C27	医药制造业	广东省	440000	汕头市	440500
534	2022	0.121813	12.1813	1	1.09861	0.101773	19.08	0	0	7.13	0.2919	1	0.12796	0	0	C27	医药制造业	广东省	440000	汕头市	440500
534	2023	0.0466088	4.66088	1	1.09861	0.113831	15.25	0	0	6.47	0.2467	0	0.051961	0	0	C27	医药制造业	广东省	440000	汕头市	440500
536	2011	0.112773	11.2773	2	0	0.0206592	0	0	0	0	0.4557	1	0.048166	1.38629	0	C39	计算机、通信和其他电子设备制造业	福建省	350000	福州市	350100
536	2012	0.100928	10.0928	2	0	0.0098662	0	0	0	0.43	0.3076	1	-0.020837	0.693147	0	C39	计算机、通信和其他电子设备制造业	福建省	350000	福州市	350100
536	2013	0.0953288	9.53288	2	0	0.0062852	0	0	0	0	0.1829	1	-0.078289	0.693147	0	C39	计算机、通信和其他电子设备制造业	福建省	350000	福州市	350100
536	2014	0.0961313	9.61313	2	0	0.0060003	0	0	0	0	0.2036	1	0.079472	0.693147	0	C39	计算机、通信和其他电子设备制造业	福建省	350000	福州市	350100
536	2015	0.10316	10.316	1	1.09861	0.0088717	7.88	0	0	0	0.2154	1	-0.242757	0.693147	0	C39	计算机、通信和其他电子设备制造业	福建省	350000	福州市	350100
536	2016	0.126157	12.6157	3	1.38629	0.0151646	5.47	0	0	0	0.092	1	3.32907	1.09861	0	C39	计算机、通信和其他电子设备制造业	福建省	350000	福州市	350100
536	2017	0.0459435	4.59435	2	1.09861	0.014132	4.57	0	0	0	0.3218	0	-0.019289	0.693147	0	C39	计算机、通信和其他电子设备制造业	福建省	350000	福州市	350100
536	2018	0.108097	10.8097	1	0.693147	0.0150192	4.75	0	0	0	0.527	1	-0.41269	0	0.693147	C39	计算机、通信和其他电子设备制造业	福建省	350000	福州市	350100
536	2019	0.255234	25.5234	2	1.79176	0.0188787	7.76	1.09861	33.3333	0	0.5782	1	-0.344259	0.693147	1.94591	C39	计算机、通信和其他电子设备制造业	福建省	350000	福州市	350100
536	2021	0.262191	26.2191	3	3.46574	0.0198271	5.75	0.693147	33.3333	0	0.5871	1	-0.037796	0	1.38629	C39	计算机、通信和其他电子设备制造业	福建省	350000	福州市	350100
536	2022	0.19224	19.224	3	3.33221	0.0317544	9.21	0	0	0	0.6493	1	-0.242558	0.693147	3.21888	C39	计算机、通信和其他电子设备制造业	福建省	350000	福州市	350100
536	2023	0.118402	11.8402	3	2.83321	0.0386272	10.19	0	0	0	0.7053	0	-0.396434	0	3.89182	C39	计算机、通信和其他电子设备制造业	福建省	350000	福州市	350100
538	2011	0.150475	15.0475	2	2.63906	0.0268772	0	0	0	2.71	0.1137	1	0.258397	0.693147	3.49651	C27	医药制造业	云南省	530000	昆明市	530100
538	2012	0.122575	12.2575	1	2.30259	0.0214716	0	0	0	2.46	0.1174	1	0.264976	0	2.56495	C27	医药制造业	云南省	530000	昆明市	530100
538	2013	0.123896	12.3896	1	2.70805	0.0173253	0	0	0	3.6222	0.0986	1	0.26841	0	2.07944	C27	医药制造业	云南省	530000	昆明市	530100
538	2014	0.149359	14.9359	2	2.99573	0.0152274	0	0	0	3.63	0.1011	1	0.251012	0	3.63759	C27	医药制造业	云南省	530000	昆明市	530100
538	2015	0.133175	13.3175	1	2.63906	0.0123807	7.96	0	0	3.76	0.085	1	0.197668	0	2.77259	C27	医药制造业	云南省	530000	昆明市	530100
538	2016	0.142989	14.2989	2	2.70805	0.0093936	8.09	0	0	4.11	0.0725	1	0.171182	0	2.48491	C27	医药制造业	云南省	530000	昆明市	530100
538	2017	0.166631	16.6631	3	3.29584	0.0115287	8.45	0	0	4.16	0.063	1	0.145131	0.693147	2.48491	C27	医药制造业	云南省	530000	昆明市	530100
538	2018	0.139358	13.9358	2	3.09104	0.0102654	8.81	0	0	4.16	0.0565	1	0.098086	0	1.38629	C27	医药制造业	云南省	530000	昆明市	530100
538	2019	0.151474	15.1474	2	3.09104	0.0108418	9.21	0	0	4.18	0.0405	1	-0.047639	0.693147	2.30259	C27	医药制造业	云南省	530000	昆明市	530100
538	2020	0.140931	14.0931	1	3.09104	0.0096909	10.21	0	0	4.36	0.0561	1	0.006407	0.693147	2.19722	C27	医药制造业	云南省	530000	昆明市	530100
538	2021	0.202272	20.2272	6	3.78419	0.0133684	13.07	0	0	5.12	0.0568	1	0.002342	0.693147	1.38629	C27	医药制造业	云南省	530000	昆明市	530100
538	2022	0.250751	25.0751	6	3.66356	0.0110836	14.7	0.693147	9.09091	6.27	0.0511	1	0.00239	0.693147	2.48491	C27	医药制造业	云南省	530000	昆明市	530100
538	2023	0.135957	13.5957	6	3.63759	0.0108465	5.97	0	0	6.42	0.0495	0	0.035777	1.09861	2.30259	C27	医药制造业	云南省	530000	昆明市	530100
541	2011	0.222389	22.2389	4	0	0.0692866	0	1.09861	22.2222	0	0.2038	1	0.009304	1.09861	2.30259	C38	电气机械及器材制造业	广东省	440000	佛山市	440600
541	2012	0.14236	14.236	4	0	0.0436231	0	0	0	0	0.1564	1	0.055968	1.60944	2.19722	C38	电气机械及器材制造业	广东省	440000	佛山市	440600
541	2013	0.145923	14.5923	3	0	0.0513473	0	0	0	0	0.1401	1	-0.023961	1.94591	3.91202	C38	电气机械及器材制造业	广东省	440000	佛山市	440600
541	2014	0.154416	15.4416	3	0.693147	0.0500746	0	0	0	0	0.124	1	0.057809	1.94591	4.14314	C38	电气机械及器材制造业	广东省	440000	佛山市	440600
541	2015	0.135029	13.5029	3	0.693147	0.0270964	2.88	0	0	0	0.0801	1	0.634429	0.693147	3.04452	C38	电气机械及器材制造业	广东省	440000	佛山市	440600
541	2016	0.130689	13.0689	3	0	0.0262829	2.78	0	0	0	0.0731	1	-0.010334	0.693147	3.55535	C38	电气机械及器材制造业	广东省	440000	佛山市	440600
541	2017	0.152859	15.2859	3	1.60944	0.0274048	2.82	0	0	0	0.0852	1	-0.041123	0.693147	4.12713	C38	电气机械及器材制造业	广东省	440000	佛山市	440600
541	2018	0.200326	20.0326	4	1.60944	0.0309091	7.29	0.693147	1.20482	0	0.0916	1	-0.095491	1.60944	4.43082	C38	电气机械及器材制造业	广东省	440000	佛山市	440600
541	2019	0.20806	20.806	4	2.30259	0.0271775	8.38	0.693147	1.47059	0	0.102	1	0.130398	1.60944	4.23411	C38	电气机械及器材制造业	广东省	440000	佛山市	440600
541	2020	0.193849	19.3849	2	1.79176	0.0200361	10.81	1.09861	1.23457	0.44	0.0805	1	0.269833	1.09861	5.09375	C38	电气机械及器材制造业	广东省	440000	佛山市	440600
541	2021	0.153475	15.3475	3	2.19722	0.0280088	13.2	1.38629	1.72414	0.7	0.1364	0	-0.005667	1.09861	5.16479	C38	电气机械及器材制造业	广东省	440000	佛山市	440600
541	2022	0.17269	17.2691	3	2.63906	0.0222519	14.89	1.38629	1.10294	1.44	0.2295	0	-0.187101	1.94591	5.60947	C38	电气机械及器材制造业	广东省	440000	佛山市	440600
541	2023	0.189861	18.9861	5	2.3979	0.0256607	14.17	1.38629	1.65746	1.65	0.2039	0	0.136177	1.94591	5.20401	C38	电气机械及器材制造业	广东省	440000	佛山市	440600
545	2013	0.0493068	4.93068	1	0.693147	0.0455061	0	0	0	2.03	0.4864	0	0.14403	2.07944	0	C26	化学原料及化学制品制造业	吉林省	220000	吉林市	220200
545	2014	0.0302801	3.02801	2	0	0.0245399	0	0	0	1.23	0.2606	0	1.15381	0.693147	0	C26	化学原料及化学制品制造业	吉林省	220000	吉林市	220200
545	2015	0.125376	12.5376	2	1.09861	0.0199542	6.82	0	0	0.83	0.2352	1	0.086991	1.79176	0	C26	化学原料及化学制品制造业	吉林省	220000	吉林市	220200
545	2016	0.126527	12.6527	2	0	0.0247029	6.59	0	0	1.2071	0.4677	1	0.078072	2.19722	0	C26	化学原料及化学制品制造业	吉林省	220000	吉林市	220200
545	2017	0.13526	13.5259	2	0	0.0191693	12.57	0	0	1.4	0.4444	1	0.052989	2.83321	0	C26	化学原料及化学制品制造业	吉林省	220000	吉林市	220200
545	2018	0.133362	13.3362	2	0	0.0163711	13.72	0	0	1.49	0.3764	1	0.024592	2.83321	0	C26	化学原料及化学制品制造业	吉林省	220000	吉林市	220200
545	2019	0.1334	13.34	2	0	0.0161363	13.74	0	0	1.82	0.3809	1	0.011378	2.77259	0	C26	化学原料及化学制品制造业	吉林省	220000	吉林市	220200
545	2020	0.145686	14.5686	2	1.09861	0.0171904	14.21	0	0	1.45	0.3895	1	-0.129829	2.77259	0	C26	化学原料及化学制品制造业	吉林省	220000	吉林市	220200
545	2021	0.135293	13.5293	2	1.09861	0.0157328	15.71	0	0	1.72	0.3433	1	0.062025	1.60944	0	C26	化学原料及化学制品制造业	吉林省	220000	吉林市	220200
545	2022	0.134416	13.4416	2	1.09861	0.0231471	12.7	0	0	1.86	0.3223	1	-0.021924	1.79176	0	C26	化学原料及化学制品制造业	吉林省	220000	吉林市	220200
545	2023	0.0697352	6.97352	2	1.09861	0.0237741	11.5	0	0	1.86	0.3832	0	-0.19963	2.30259	0	C26	化学原料及化学制品制造业	吉林省	220000	吉林市	220200
547	2011	0.039107	3.9107	2	0.693147	0.0142116	0	0	0	10.46	0.0409	0	0.222125	0.693147	0	C39	计算机、通信和其他电子设备制造业	福建省	350000	福州市	350100
547	2012	0.0226051	2.26051	1	0.693147	0.0116258	0	0	0	11.42	0.0339	0	0.068826	0	0	C39	计算机、通信和其他电子设备制造业	福建省	350000	福州市	350100
547	2013	0.0274082	2.74082	1	0.693147	0.0111334	0	0	0	14.9646	0.054	0	0.009396	0	0	C39	计算机、通信和其他电子设备制造业	福建省	350000	福州市	350100
547	2014	0.0169895	1.69895	1	0	0.0278649	0	0	0	11.6134	0.0539	0	0.369678	0	0	C39	计算机、通信和其他电子设备制造业	福建省	350000	福州市	350100
547	2015	0.0668125	6.68125	1	1.09861	0.0256169	44.89	0	0	16.73	0.0356	0	11.3422	0	0	C39	计算机、通信和其他电子设备制造业	福建省	350000	福州市	350100
547	2016	0.0730611	7.30611	1	1.38629	0.0274337	46.71	0	0	17.647	0.0606	0	-0.03072	0	0	C39	计算机、通信和其他电子设备制造业	福建省	350000	福州市	350100
547	2017	0.0901404	9.01404	2	1.94591	0.0388457	40.19	0	0	20.2	0.0827	0	0.050268	0	0	C39	计算机、通信和其他电子设备制造业	福建省	350000	福州市	350100
547	2018	0.0852455	8.52455	1	2.83321	0.038026	36.82	0	0	20.06	0.0662	0	0.242202	0	0	C39	计算机、通信和其他电子设备制造业	福建省	350000	福州市	350100
547	2019	0.0961713	9.61713	1	3.49651	0.0401708	39.7	0	0	21.46	0.0635	0	0.131756	0	0	C39	计算机、通信和其他电子设备制造业	福建省	350000	福州市	350100
547	2020	0.101392	10.1392	1	3.80666	0.0394791	43.87	0	0	20.82	0.053	0	0.136616	0	0	C39	计算机、通信和其他电子设备制造业	福建省	350000	福州市	350100
547	2021	0.185917	18.5917	2	4.12713	0.0455845	39.9	0	0	22.45	0.0492	1	0.071594	0	0	C39	计算机、通信和其他电子设备制造业	福建省	350000	福州市	350100
547	2022	0.203286	20.3286	3	4.11087	0.0399475	47.11	0	0	23.65	0.0492	1	0.020934	0	0	C39	计算机、通信和其他电子设备制造业	福建省	350000	福州市	350100
547	2023	0.135042	13.5042	3	3.82864	0.0416467	54.19	0	0	23.65	0.0541	0	-0.223107	0	0	C39	计算机、通信和其他电子设备制造业	福建省	350000	福州市	350100
550	2011	0.158705	15.8705	3	0	0.0248143	0	0.693147	0.724638	0	0.1929	1	0.189749	0	4.93447	C36	汽车制造业	江西省	360000	南昌市	360100
550	2012	0.159052	15.9052	3	0	0.0215464	0	0.693147	0.980392	2.44	0.1756	1	0.102614	0	4.63473	C36	汽车制造业	江西省	360000	南昌市	360100
550	2013	0.12141	12.141	1	0	0.0378457	0	0	0	3.3719	0.2601	1	0.120598	0	4.86754	C36	汽车制造业	江西省	360000	南昌市	360100
550	2014	0.155057	15.5056	2	0	0.0317667	0	0.693147	1.5873	3.1134	0.2285	1	0.155268	0.693147	4.15888	C36	汽车制造业	江西省	360000	南昌市	360100
550	2015	0.171434	17.1434	2	0	0.0324858	13.44	0.693147	0.735294	6	0.2226	1	0.130464	0.693147	4.91998	C36	汽车制造业	江西省	360000	南昌市	360100
550	2016	0.19392	19.392	3	0	0.0302972	13.19	1.09861	2.35294	5.4847	0.2282	1	0.035731	0.693147	4.45435	C36	汽车制造业	江西省	360000	南昌市	360100
550	2017	0.233287	23.3287	3	1.79176	0.0306263	13.94	1.60944	2.77778	5.43	0.2288	1	0.013149	0.693147	4.97673	C36	汽车制造业	江西省	360000	南昌市	360100
550	2018	0.248478	24.8478	2	2.30259	0.0358299	16.28	2.07944	4.04624	6.12	0.2427	1	-0.174024	0.693147	5.15906	C36	汽车制造业	江西省	360000	南昌市	360100
550	2019	0.2218	22.18	1	2.48491	0.0390458	18.65	1.38629	1.23967	7.21	0.2352	1	0.010792	1.09861	5.49306	C36	汽车制造业	江西省	360000	南昌市	360100
550	2020	0.225432	22.5432	1	2.77259	0.0330454	17.73	1.60944	1.63265	6.89	0.1833	1	0.046673	0.693147	5.50533	C36	汽车制造业	江西省	360000	南昌市	360100
550	2021	0.296961	29.6962	2	2.56495	0.0407405	17.9	3.3673	7.29167	6.88	0.2287	1	-0.221275	0	5.95324	C36	汽车制造业	江西省	360000	南昌市	360100
550	2022	0.279839	27.9839	2	2.48491	0.0435049	19.05	2.77259	6.63717	7.16	0.1983	1	0.08009	0.693147	5.42495	C36	汽车制造业	江西省	360000	南昌市	360100
550	2023	0.209815	20.9815	2	2.3979	0.0580286	21.32	2.89037	7.02479	7.81	0.1849	0	0.080538	0	5.49306	C36	汽车制造业	江西省	360000	南昌市	360100
553	2011	0.032588	3.2588	1	0	0.0643156	0	0	0	0.39	0.486	0	0.016521	1.09861	0	C26	化学原料及化学制品制造业	湖北省	420000	荆州市	421000
553	2012	0.0504513	5.04513	2	0	0.0598231	0	0	0	0.58	0.544	0	0.085278	1.60944	0	C26	化学原料及化学制品制造业	湖北省	420000	荆州市	421000
553	2013	0.0567859	5.67859	2	0	0.0507228	0	0	0	0.8011	0.489	0	0.222623	2.63906	0	C26	化学原料及化学制品制造业	湖北省	420000	荆州市	421000
553	2014	0.0605563	6.05563	3	0	0.0477187	0	0	0	0.7296	0.4256	0	0.298074	2.07944	0	C26	化学原料及化学制品制造业	湖北省	420000	荆州市	421000
553	2015	0.13531	13.531	3	0	0.0556114	1.07	0	0	0.64	0.5656	1	0.044828	1.79176	0	C26	化学原料及化学制品制造业	湖北省	420000	荆州市	421000
553	2016	0.12884	12.884	2	0	0.0696054	1.16	0	0	0.7523	0.5375	1	-0.044019	1.79176	0.693147	C26	化学原料及化学制品制造业	湖北省	420000	荆州市	421000
553	2017	0.130177	13.0177	3	0	0.101898	3.63	0	0	0.88	0.155	1	0.109956	1.60944	1.09861	C26	化学原料及化学制品制造业	湖北省	420000	荆州市	421000
553	2018	0.117063	11.7063	1	0.693147	0.13261	3.84	0	0	0.88	0.1549	1	0.186501	1.94591	0.693147	C26	化学原料及化学制品制造业	湖北省	420000	荆州市	421000
553	2019	0.121759	12.1759	2	0	0.128857	3.47	0	0	0.3483	0.1532	1	-0.016408	2.19722	0.693147	C26	化学原料及化学制品制造业	湖北省	420000	荆州市	421000
553	2020	0.118022	11.8022	2	0	0.111674	3.34	0	0	1.98	0.1405	1	-0.041917	2.30259	0	C26	化学原料及化学制品制造业	湖北省	420000	荆州市	421000
553	2021	0.129755	12.9755	3	0	0.106027	2.86	0	0	1.7824	0.1602	1	-0.016741	1.79176	0.693147	C26	化学原料及化学制品制造业	湖北省	420000	荆州市	421000
553	2022	0.142952	14.2952	4	0.693147	0.0921474	3.01	0	0	1.9548	0.1544	1	0.097251	1.79176	0	C26	化学原料及化学制品制造业	湖北省	420000	荆州市	421000
553	2023	0.351203	35.1203	6	1.09861	0.0959878	3.26	1.79176	83.3333	5.35	0.1812	0	-0.0519	1.60944	1.94591	C26	化学原料及化学制品制造业	湖北省	420000	荆州市	421000
559	2011	0.0103622	1.22037	1	0	0.0157868	0	0	0	0	0.2399	0	0.020486	0	0	C36	汽车制造业	浙江省	330000	杭州市	330100
559	2012	0.0356516	3.56516	3	0	0.0225178	0	0	0	0.73	0.2788	0	-0.081008	0	0	C36	汽车制造业	浙江省	330000	杭州市	330100
559	2013	0.0351623	3.51623	3	0	0.0212179	0	0	0	0.771	0.2671	0	-0.15254	0	0	C36	汽车制造业	浙江省	330000	杭州市	330100
559	2014	0.0220899	2.20899	2	0	0.0154671	0	0	0	0.68	0.2321	0	0.134321	0	0	C36	汽车制造业	浙江省	330000	杭州市	330100
559	2015	0.0296988	2.96988	2	0	0.0143547	10.64	0	0	0.82	0.2271	0	0.050931	0	0	C36	汽车制造业	浙江省	330000	杭州市	330100
559	2016	0.0375682	3.75683	2	0	0.0167995	11.21	0	0	1.1122	0.2548	0	0.007498	0.693147	0	C36	汽车制造业	浙江省	330000	杭州市	330100
559	2017	0.0472651	4.72651	2	1.38629	0.0168464	11.29	0	0	1.19	0.2632	0	0.141504	0	0	C36	汽车制造业	浙江省	330000	杭州市	330100
559	2018	0.131333	13.1333	2	1.38629	0.0162106	10.23	0	0	1.92	0.2574	1	0.013033	1.60944	0	C36	汽车制造业	浙江省	330000	杭州市	330100
559	2019	0.147002	14.7002	3	1.94591	0.0127639	9.05	0	0	2.66	0.2676	1	-0.002638	1.38629	0	C36	汽车制造业	浙江省	330000	杭州市	330100
559	2020	0.146222	14.6222	3	2.19722	0.0114463	8.45	0	0	2.35	0.1996	1	0.623489	1.38629	0	C36	汽车制造业	浙江省	330000	杭州市	330100
559	2021	0.131379	13.1379	2	2.19722	0.0126084	8.78	0	0	2.17	0.169	1	-0.006856	1.09861	0	C36	汽车制造业	浙江省	330000	杭州市	330100
559	2022	0.177809	17.7809	2	1.60944	0.0117169	7.02	0.693147	2.43902	1.43	0.1399	1	0.015363	1.60944	3.73767	C36	汽车制造业	浙江省	330000	杭州市	330100
559	2023	0.0727925	7.27925	2	1.09861	0.010668	7.49	0	0	1.43	0.1208	0	0.01463	1.60944	3.29584	C36	汽车制造业	浙江省	330000	杭州市	330100
561	2011	0.0224502	2.24502	1	0.693147	0.0397574	0	0	0	3.15	0.1039	0	0.145836	0	0.693147	C39	计算机、通信和其他电子设备制造业	陕西省	610000	宝鸡市	610300
561	2012	0.0393724	3.93724	1	1.79176	0.0335213	0	0	0	3.5	0.1035	0	0.031346	0	1.38629	C39	计算机、通信和其他电子设备制造业	陕西省	610000	宝鸡市	610300
561	2013	0.0377244	3.77244	1	0.693147	0.0399625	0	0	0	4.8099	0.0925	0	0.067878	0	2.63906	C39	计算机、通信和其他电子设备制造业	陕西省	610000	宝鸡市	610300
561	2014	0.0376676	3.76676	1	0	0.0334628	0	0	0	5.84	0.0777	0	0.047759	0.693147	2.83321	C39	计算机、通信和其他电子设备制造业	陕西省	610000	宝鸡市	610300
561	2015	0.0514414	5.14414	1	0	0.0271974	27.62	0	0	6.09	0.0603	0	0.08416	0	2.89037	C39	计算机、通信和其他电子设备制造业	陕西省	610000	宝鸡市	610300
561	2016	0.0552336	5.52336	1	0	0.0300779	30	0	0	6.1019	0.0805	0	0.111511	0	3.04452	C39	计算机、通信和其他电子设备制造业	陕西省	610000	宝鸡市	610300
561	2017	0.0967987	9.67987	1	0.693147	0.0358088	30.92	0.693147	4.54545	7.11	0.1146	0	0.119668	0	3.13549	C39	计算机、通信和其他电子设备制造业	陕西省	610000	宝鸡市	610300
561	2018	0.0641249	6.41249	1	0.693147	0.0329968	25.17	0	0	7.44	0.0961	0	0.072216	0	3.4012	C39	计算机、通信和其他电子设备制造业	陕西省	610000	宝鸡市	610300
561	2019	0.0625194	6.25194	1	0.693147	0.0305631	29	0	0	7.47	0.0761	0	0.080856	0.693147	2.07944	C39	计算机、通信和其他电子设备制造业	陕西省	610000	宝鸡市	610300
561	2020	0.151021	15.1021	1	0.693147	0.0272047	31	1.09861	25	7.45	0.0769	0	0.046093	0.693147	2.19722	C39	计算机、通信和其他电子设备制造业	陕西省	610000	宝鸡市	610300
561	2021	0.107155	10.7155	2	1.38629	0.0223656	29	0.693147	5.26316	0	0.1454	0	0.07704	0	2.99573	C39	计算机、通信和其他电子设备制造业	陕西省	610000	宝鸡市	610300
561	2022	0.139278	13.9278	2	0.693147	0.0193438	0.27	1.79176	17.2414	0	0.1444	0	0.052662	0	3.4012	C39	计算机、通信和其他电子设备制造业	陕西省	610000	宝鸡市	610300
561	2023	0.0965381	9.65381	2	0.693147	0.0180569	0.29	1.09861	7.14286	0	0.1348	0	0.050077	0	3.3673	C39	计算机、通信和其他电子设备制造业	陕西省	610000	宝鸡市	610300
565	2011	0.108644	10.8644	3	0	0.0571706	0	0	0	0	0.3114	1	-0.35204	0	0	C26	化学原料及化学制品制造业	重庆市	500000	重庆市	500000
565	2012	0.064002	6.4002	4	0	0.0232953	0	0	0	0	0.22	0	0.345755	1.79176	0.693147	C26	化学原料及化学制品制造业	重庆市	500000	重庆市	500000
565	2013	0.0505348	5.05348	2	0	0.0246536	0	0	0	0	0.2363	0	0.029282	2.19722	1.38629	C26	化学原料及化学制品制造业	重庆市	500000	重庆市	500000
565	2014	0.0401952	4.01952	2	0	0.0245078	0	0	0	0	0.2494	0	0.062149	2.07944	0	C26	化学原料及化学制品制造业	重庆市	500000	重庆市	500000
565	2015	0.0670873	6.70873	2	0.693147	0.0215132	13.51	0	0	0	0.2205	0	0.230768	2.19722	1.38629	C26	化学原料及化学制品制造业	重庆市	500000	重庆市	500000
565	2016	0.0643311	6.43311	2	0.693147	0.0167207	17.71	0	0	0	0.1823	0	0.26345	2.30259	0.693147	C26	化学原料及化学制品制造业	重庆市	500000	重庆市	500000
565	2017	0.0795072	7.95072	3	0.693147	0.0138415	17.65	0	0	0	0.1598	0	0.064296	2.89037	0.693147	C26	化学原料及化学制品制造业	重庆市	500000	重庆市	500000
565	2018	0.0791681	7.91681	3	0.693147	0.0144397	17.05	0	0	0	0.1497	0	0.031766	2.94444	0.693147	C26	化学原料及化学制品制造业	重庆市	500000	重庆市	500000
565	2019	0.0522339	5.22339	1	0	0.0134328	17.16	0	0	0	0.1348	0	0.050828	3.04452	1.09861	C26	化学原料及化学制品制造业	重庆市	500000	重庆市	500000
565	2020	0.064176	6.4176	2	0	0.0205495	15.41	0	0	0	0.1218	0	0.054762	3.04452	1.38629	C26	化学原料及化学制品制造业	重庆市	500000	重庆市	500000
565	2021	0.0531761	5.31761	1	0	0.0198224	15.12	0	0	0	0.1761	0	0.056909	3.43399	0.693147	C26	化学原料及化学制品制造业	重庆市	500000	重庆市	500000
565	2022	0.0622297	6.22297	2	0	0.0192914	14.37	0	0	0	0.1723	0	0.027963	3.2581	0.693147	C26	化学原料及化学制品制造业	重庆市	500000	重庆市	500000
565	2023	0.0602183	6.02183	2	0	0.0196674	15.83	0	0	0	0.1733	0	-0.045498	2.89037	0.693147	C26	化学原料及化学制品制造业	重庆市	500000	重庆市	500000
566	2011	0.0102054	1.22037	1	0	0.0813549	0	0	0	0	0.1399	0	1.65366	0	0	C27	医药制造业	海南省	460000	海口市	460100
566	2012	0.011186	1.22037	1	0	0.0795604	0	0	0	1.51	0.1248	0	0.11813	0	0	C27	医药制造业	海南省	460000	海口市	460100
566	2013	0.0175513	1.75513	1	0	0.0638894	0	0	0	2.1797	0.14	0	0.067153	0.693147	0	C27	医药制造业	海南省	460000	海口市	460100
566	2014	0.0260362	2.60362	1	0.693147	0.0612402	0	0	0	2.22	0.1663	0	0.087349	0.693147	0	C27	医药制造业	海南省	460000	海口市	460100
566	2015	0.113206	11.3206	1	1.79176	0.053061	4.74	0	0	0	0.1845	1	0.467527	1.09861	0	C27	医药制造业	海南省	460000	海口市	460100
566	2016	0.102803	10.2803	1	1.09861	0.0453954	2.95	0	0	1.72	0.1057	1	1.21955	1.09861	0	C27	医药制造业	海南省	460000	海口市	460100
566	2017	0.131955	13.1955	1	3.09104	0.0442599	5.36	0	0	4.64	0.1061	1	-0.098212	1.38629	0	C27	医药制造业	海南省	460000	海口市	460100
566	2018	0.124449	12.4449	1	2.48491	0.0431711	8.44	0	0	3.22	0.1314	1	-0.049583	1.09861	0	C27	医药制造业	海南省	460000	海口市	460100
566	2019	0.11438	11.438	1	1.60944	0.0442182	8.73	0	0	2.79	0.1236	1	-0.040369	1.09861	0	C27	医药制造业	海南省	460000	海口市	460100
566	2020	0.120202	12.0202	1	2.07944	0.0397239	8.2	0	0	1.75	0.1879	1	-0.142316	1.09861	0	C27	医药制造业	海南省	460000	海口市	460100
566	2021	0.116959	11.6959	1	1.60944	0.0547422	6.31	0	0	2.93	0.2148	1	-0.399533	1.09861	0	C27	医药制造业	海南省	460000	海口市	460100
566	2022	0.0315347	3.15347	1	0.693147	0.0468	5.18	0	0	2.71	0.2174	0	-0.019979	0.693147	0	C27	医药制造业	海南省	460000	海口市	460100
566	2023	0.0330652	3.30653	1	0.693147	0.0692897	6.3	0	0	2.71	0.2032	0	-0.058534	0.693147	0	C27	医药制造业	海南省	460000	海口市	460100
570	2011	0.0219603	2.19603	1	0	0.030775	0	0	0	0.43	0.1494	0	-0.159988	0	1.94591	C34	通用设备制造业	江苏省	320000	常州市	320400
570	2012	0.0190904	1.90904	1	0	0.0276156	0	0	0	0.44	0.1816	0	0.059737	0	1.38629	C34	通用设备制造业	江苏省	320000	常州市	320400
570	2013	0.0228388	2.28388	1	0	0.0276819	0	0	0	0.4419	0.2036	0	-0.018953	0	1.79176	C34	通用设备制造业	江苏省	320000	常州市	320400
570	2014	0.034777	3.4777	1	0	0.0329802	0	0	0	0.55	0.1809	0	0.069596	0.693147	2.70805	C34	通用设备制造业	江苏省	320000	常州市	320400
570	2015	0.0367549	3.67549	1	0	0.0318962	10.76	0	0	0.59	0.1716	0	0.034485	0	2.77259	C34	通用设备制造业	江苏省	320000	常州市	320400
570	2016	0.0472558	4.72558	1	0	0.0268239	10.55	0	0	0	0.1486	0	0.159356	1.09861	3.21888	C34	通用设备制造业	江苏省	320000	常州市	320400
570	2017	0.0424595	4.24595	1	0	0.0289256	10.87	0	0	0	0.1504	0	-0.031965	1.09861	2.48491	C34	通用设备制造业	江苏省	320000	常州市	320400
570	2018	0.0457318	4.57318	1	0	0.0290724	11.55	0	0	0	0.1442	0	-0.089051	1.79176	2.07944	C34	通用设备制造业	江苏省	320000	常州市	320400
570	2019	0.0614759	6.14759	2	0	0.0285768	11.96	0	0	0	0.1312	0	0.03277	2.07944	2.3979	C34	通用设备制造业	江苏省	320000	常州市	320400
570	2020	0.107582	10.7582	2	0.693147	0.0401904	12.36	0.693147	8.33333	0	0.1149	0	0.076187	1.94591	2.56495	C34	通用设备制造业	江苏省	320000	常州市	320400
570	2021	0.069763	6.9763	1	1.94591	0.0319223	9.55	0	0	0	0.0829	0	0.350711	1.79176	2.99573	C34	通用设备制造业	江苏省	320000	常州市	320400
570	2022	0.114353	11.4353	2	2.19722	0.0301555	8.89	0.693147	4	0	0.138	0	0.084018	1.60944	3.2581	C34	通用设备制造业	江苏省	320000	常州市	320400
570	2023	0.0990994	9.90995	1	1.79176	0.0287743	8.74	0.693147	5.26316	0	0.1309	0	0.033627	1.60944	2.99573	C34	通用设备制造业	江苏省	320000	常州市	320400
571	2011	0.026979	2.6979	1	0	0.0868246	0	0	0	0.19	0.3168	0	-0.21191	1.09861	0	C37	铁路、船舶、航空航天和其它运输设备制造业	海南省	460000	海口市	460100
572	2011	0.0129854	1.29854	1	0	0.0749222	0	0	0	0.9	0.195	0	0.059041	0	0	C36	汽车制造业	海南省	460000	海口市	460100
572	2012	0.0154998	1.54998	1	0	0.084709	0	0	0	1.3	0.2332	0	0.050896	0	0	C36	汽车制造业	海南省	460000	海口市	460100
572	2013	0.0224487	2.24487	1	0	0.0964713	0	0	0	1.433	0.2391	0	0.064169	0.693147	0	C36	汽车制造业	海南省	460000	海口市	460100
572	2014	0.0232564	2.32564	1	0.693147	0.0973353	0	0	0	1.8	0.2056	0	0.029451	0	0	C36	汽车制造业	海南省	460000	海口市	460100
572	2015	0.0624093	6.24093	1	2.07944	0.0890428	21.11	0	0	2.59	0.1794	0	-0.001007	1.09861	0	C36	汽车制造业	海南省	460000	海口市	460100
572	2016	0.0433329	4.33329	1	1.38629	0.0868421	17.23	0	0	3.5365	0.1713	0	-0.007177	0	0	C36	汽车制造业	海南省	460000	海口市	460100
572	2017	0.0532744	5.32744	1	2.07944	0.089029	19.72	0	0	4.3	0.1609	0	-0.142409	0	0	C36	汽车制造业	海南省	460000	海口市	460100
572	2018	0.0722923	7.22923	1	2.07944	0.100565	22.5	0	0	4.65	0.2667	0	-0.301288	1.38629	0	C36	汽车制造业	海南省	460000	海口市	460100
572	2021	0.0622642	6.22642	1	2.30259	0.143693	5.04	0	0	2.49	0.2717	0	0.026011	1.38629	0	C36	汽车制造业	海南省	460000	海口市	460100
572	2022	0.0621925	6.21925	1	1.38629	0.140652	18.98	0	0	2.1	0.2829	0	-0.346388	1.38629	0	C36	汽车制造业	海南省	460000	海口市	460100
572	2023	0.0554468	5.54468	1	1.09861	0.103236	16.72	0	0	1.49	0.2166	0	-0.067438	1.79176	0	C36	汽车制造业	海南省	460000	海口市	460100
576	2020	0.0340682	3.40682	1	0	0.0069231	32.61	0	0	0	0.0165	0	0.51556	1.09861	0	C35	专用设备制造业	广东省	440000	江门市	440700
576	2021	0.0375807	3.75807	1	0	0.0044358	37.42	0	0	0	0.0212	0	-0.060987	1.09861	0	C35	专用设备制造业	广东省	440000	江门市	440700
576	2022	0.0435704	4.35704	1	0	0.0054577	37.05	0	0	0	0.0288	0	0.097056	1.79176	0	C35	专用设备制造业	广东省	440000	江门市	440700
576	2023	0.0415559	4.15559	2	0	0.0054873	39.43	0	0	0	0.0347	0	-0.087653	0	0	C35	专用设备制造业	广东省	440000	江门市	440700
581	2011	0.100767	10.0767	1	0	0.031519	0	0	0	1.78	0.1712	1	0.228857	1.38629	1.09861	C34	通用设备制造业	江苏省	320000	无锡市	320200
581	2012	0.124004	12.4004	4	0	0.0253533	0	0	0	2.01	0.1271	1	0.677965	0.693147	0.693147	C36	汽车制造业	江苏省	320000	无锡市	320200
581	2013	0.117624	11.7624	3	0	0.0275569	0	0	0	2.393	0.1125	1	0.115687	0.693147	1.38629	C36	汽车制造业	江苏省	320000	无锡市	320200
581	2014	0.112864	11.2864	2	0.693147	0.0251138	0	0	0	3.56	0.0932	1	0.126575	1.09861	0.693147	C36	汽车制造业	江苏省	320000	无锡市	320200
581	2015	0.157816	15.7816	3	1.09861	0.0229629	19.81	0	0	4.2	0.1478	1	0.084361	1.60944	1.79176	C36	汽车制造业	江苏省	320000	无锡市	320200
581	2016	0.199893	19.9893	4	0	0.0201119	20.79	0.693147	12.5	4.2418	0.1418	1	0.097038	0.693147	2.19722	C36	汽车制造业	江苏省	320000	无锡市	320200
581	2017	0.289303	28.9303	4	1.94591	0.0168371	20.92	1.60944	26.6667	3.86	0.1278	1	0.145759	1.60944	2.77259	C36	汽车制造业	江苏省	320000	无锡市	320200
581	2018	0.271968	27.1968	4	2.63906	0.015551	20.08	1.79176	11.6279	4.42	0.1296	1	0.071694	1.09861	3.78419	C36	汽车制造业	江苏省	320000	无锡市	320200
581	2019	0.243079	24.3079	4	2.94444	0.0179726	18.75	1.09861	8	4.98	0.1188	1	0.06277	1.09861	3.2581	C36	汽车制造业	江苏省	320000	无锡市	320200
581	2020	0.292358	29.2358	3	2.83321	0.0166143	20.3	1.94591	23.0769	5.96	0.1054	1	0.074912	1.38629	3.29584	C36	汽车制造业	江苏省	320000	无锡市	320200
581	2021	0.276786	27.6786	2	2.3979	0.0157519	20.82	2.30259	14.7541	6.27	0.1048	1	0.062159	1.60944	4.12713	C36	汽车制造业	江苏省	320000	无锡市	320200
581	2022	0.277261	27.7261	2	2.30259	0.0170924	20.92	2.3979	9.52381	8.34	0.1321	1	-0.076542	1.94591	4.66344	C36	汽车制造业	江苏省	320000	无锡市	320200
581	2023	0.204965	20.4965	2	2.63906	0.0172655	21.84	1.94591	15.7895	9.41	0.1414	0	0.094578	1.79176	3.66356	C36	汽车制造业	江苏省	320000	无锡市	320200
584	2011	0.0963159	9.63159	1	0	0.0089343	0	0	0	0	0.4031	1	-0.006197	1.09861	0	C28	化学纤维制造业	四川省	510000	成都市	510100
584	2012	0.0854542	8.54542	1	0	0.008621	0	0	0	0	0.365	1	-0.016878	0	0	C28	化学纤维制造业	四川省	510000	成都市	510100
584	2013	0.0845165	8.45165	1	0	0.0086006	0	0	0	0	0.341	1	0.224759	0	0	C28	化学纤维制造业	四川省	510000	成都市	510100
584	2014	0.0922971	9.22971	1	0	0.0130524	0	0	0	0	0.295	1	-0.072408	1.09861	0	C28	化学纤维制造业	江苏省	320000	江阴市	320281
584	2015	0.0822863	8.22863	1	0	0.0081573	0	0	0	0	0.2851	1	-0.003214	0	0	C28	化学纤维制造业	江苏省	320000	江阴市	320281
584	2016	0.122104	12.2104	1	3.46574	0.0103947	0	0	0	0	0.1841	1	-0.243313	0.693147	0	C28	化学纤维制造业	江苏省	320000	江阴市	320281
584	2017	0.152395	15.2395	1	5.03695	0.0192618	25.56	0	0	2.61	0.109	1	0.07148	0	0	C28	化学纤维制造业	江苏省	320000	江阴市	320281
584	2018	0.184016	18.4016	1	5.03695	0.0182705	40.44	0	0	3.5	0.0254	1	0.067643	1.09861	1.94591	C28	化学纤维制造业	江苏省	320000	江阴市	320281
584	2019	0.18886	18.886	1	5.03695	0.0275455	41.07	0	0	4.15	0.0231	1	0.036616	1.09861	2.3979	C35	专用设备制造业	江苏省	320000	江阴市	320281
584	2020	0.181645	18.1645	1	5.03695	0.0247222	41.35	0	0	2.92	0.0192	1	0.36702	0.693147	2.07944	C35	专用设备制造业	江苏省	320000	江阴市	320281
584	2021	0.175446	17.5446	1	5.03695	0.0331996	51.02	0	0	3.44	0.032	1	-0.232919	0.693147	0	C35	专用设备制造业	江苏省	320000	江阴市	320281
584	2022	0.138813	13.8813	1	5.03695	0.0287272	0	0	0	2.75	0.0674	1	-0.429518	0.693147	0	C35	专用设备制造业	江苏省	320000	江阴市	320281
586	2012	0.0212406	2.12406	1	0.693147	0.0479741	0	0	0	1.26	0.0914	0	0.043013	0.693147	0	C39	计算机、通信和其他电子设备制造业	四川省	510000	成都市	510100
586	2013	0.0128282	1.28282	1	0	0.0417378	0	0	0	1.0598	0.0844	0	0.054573	0.693147	0	C39	计算机、通信和其他电子设备制造业	四川省	510000	成都市	510100
586	2014	0.0249542	2.49542	1	1.09861	0.0380661	0	0	0	1.88	0.0698	0	0.039586	0.693147	0	C39	计算机、通信和其他电子设备制造业	四川省	510000	成都市	510100
586	2015	0.0386431	3.8643	1	1.79176	0.0396947	9.48	0	0	1.3	0.0655	0	0.086017	0.693147	0	C39	计算机、通信和其他电子设备制造业	四川省	510000	成都市	510100
586	2016	0.109124	10.9124	1	1.79176	0.036678	9.75	0	0	1.4	0.0595	1	0.019269	0.693147	0	C39	计算机、通信和其他电子设备制造业	四川省	510000	成都市	510100
586	2017	0.107468	10.7468	1	2.19722	0.0359901	9.24	0	0	1.37	0.0662	1	0.0071	0	0	C39	计算机、通信和其他电子设备制造业	四川省	510000	成都市	510100
586	2018	0.123719	12.3719	1	2.70805	0.0371033	13.12	0	0	2.74	0.0751	1	-0.005823	0.693147	0	C39	计算机、通信和其他电子设备制造业	四川省	510000	成都市	510100
586	2019	0.132589	13.2589	1	3.09104	0.0356108	20.08	0	0	2.56	0.0736	1	0.027938	0.693147	0	C39	计算机、通信和其他电子设备制造业	四川省	510000	成都市	510100
586	2020	0.124013	12.4013	1	1.94591	0.0349782	21.89	0	0	4.31	0.0897	1	0.017368	0.693147	0	C39	计算机、通信和其他电子设备制造业	四川省	510000	成都市	510100
586	2021	0.116601	11.6601	2	0	0.032013	23.36	0	0	5.24	0.104	1	0.102799	0.693147	0	C39	计算机、通信和其他电子设备制造业	四川省	510000	成都市	510100
586	2022	0.126726	12.6727	2	1.09861	0.02829	23.04	0	0	4.02	0.1037	1	0.063803	0.693147	0	C39	计算机、通信和其他电子设备制造业	四川省	510000	成都市	510100
586	2023	0.0557564	5.57564	2	0.693147	0.0260745	26.07	0	0	5.98	0.0967	0	0.064449	0.693147	0	C39	计算机、通信和其他电子设备制造业	四川省	510000	成都市	510100
590	2011	0.104684	10.4684	1	0	0.222654	0	0	0	0.49	0.2798	1	0.295505	0	1.38629	C27	医药制造业	湖南省	430000	衡阳市	430400
590	2012	0.100719	10.0719	1	0	0.186945	0	0	0	0.41	0.2329	1	0.324641	0	1.38629	C27	医药制造业	湖南省	430000	衡阳市	430400
590	2013	0.0946863	9.46863	1	0	0.264133	0	0	0	0.3224	0.2214	1	-0.436855	0	0	C27	医药制造业	湖南省	430000	衡阳市	430400
590	2014	0.0954541	9.54541	1	0	0.266032	0	0	0	0.36	0.237	1	-0.316887	0	0	C27	医药制造业	湖南省	430000	衡阳市	430400
590	2016	0.117588	11.7588	1	0.693147	0.27185	3.8	0	0	0.7726	0.2262	1	0.282621	0	1.60944	C27	医药制造业	湖南省	430000	衡阳市	430400
590	2017	0.105654	10.5654	1	0.693147	0.19213	4.5	0	0	0.95	0.1847	1	1.20996	0	0.693147	C27	医药制造业	湖南省	430000	衡阳市	430400
590	2018	0.111281	11.128	1	0.693147	0.168512	4.5	0	0	1	0.1867	1	-0.006193	1.38629	0	C27	医药制造业	湖南省	430000	衡阳市	430400
590	2019	0.11229	11.229	1	0.693147	0.159082	4.87	0	0	1.05	0.1694	1	0.073212	1.60944	0	C27	医药制造业	湖南省	430000	衡阳市	430400
590	2020	0.0431092	4.31092	1	1.09861	0.154862	4.78	0	0	0.56	0.1629	0	0.036522	1.38629	0	C27	医药制造业	湖南省	430000	衡阳市	430400
590	2021	0.0508233	5.08233	1	1.60944	0.138139	4.53	0	0	0.91	0.2361	0	0.058054	1.38629	0	C27	医药制造业	湖南省	430000	衡阳市	430400
590	2022	0.0429619	4.29619	1	1.09861	0.134938	5.5	0	0	0.84	0.2288	0	0.029565	1.09861	0	C27	医药制造业	湖南省	430000	衡阳市	430400
590	2023	0.0385783	3.85783	1	0.693147	0.114955	6.6	0	0	1.13	0.2299	0	0.036593	1.09861	0	C27	医药制造业	湖南省	430000	衡阳市	430400
595	2013	0.0404799	4.04799	1	0	0.116775	0	0	0	0.1291	0.1592	0	0.232194	1.38629	2.19722	C34	通用设备制造业	宁夏回族自治区	640000	银川市	640100
595	2014	0.055165	5.5165	2	0	0.129669	0	0	0	0.23	0.2245	0	0.078429	1.38629	2.19722	C34	通用设备制造业	宁夏回族自治区	640000	银川市	640100
595	2015	0.135784	13.5784	2	0	0.128018	15.06	0	0	0.4	0.1795	1	1.55189	1.38629	2.30259	C34	通用设备制造业	宁夏回族自治区	640000	银川市	640100
595	2016	0.127104	12.7104	1	0	0.125388	13.19	0	0	0.4933	0.2823	1	-0.112278	1.38629	2.30259	C34	通用设备制造业	宁夏回族自治区	640000	银川市	640100
595	2018	0.108484	10.8484	1	0.693147	0.0779426	13.86	0	0	0	0.253	1	-0.090747	0.693147	0	C34	通用设备制造业	宁夏回族自治区	640000	银川市	640100
595	2019	0.0334701	3.34701	1	0	0.0912067	15.4	0	0	0	0.2851	0	-0.455339	0.693147	0	C34	通用设备制造业	宁夏回族自治区	640000	银川市	640100
595	2021	0.0383333	3.83333	1	0	0.0949575	21.08	0	0	1.49	0.28	0	-0.185814	0	0.693147	C34	通用设备制造业	宁夏回族自治区	640000	银川市	640100
595	2022	0.0340804	3.40804	1	0	0.100368	21.37	0	0	1.28	0.2899	0	-0.104793	0	0	C34	通用设备制造业	宁夏回族自治区	640000	银川市	640100
595	2023	0.0394331	3.94332	1	0	0.108475	19.74	0	0	1.18	0.2974	0	-0.231638	0.693147	0	C34	通用设备制造业	宁夏回族自治区	640000	银川市	640100
597	2011	0.0579375	5.79375	3	0	0.146206	0	0	0	0	0.2519	0	-0.156423	1.09861	1.09861	C27	医药制造业	辽宁省	210000	沈阳市	210100
597	2012	0.0353305	3.53304	2	0	0.135367	0	0	0	2.08	0.2298	0	0.008191	0	0.693147	C27	医药制造业	辽宁省	210000	沈阳市	210100
597	2013	0.122131	12.2131	2	0	0.100132	0	0	0	3.0333	0.2048	1	-0.086425	1.79176	1.09861	C27	医药制造业	辽宁省	210000	沈阳市	210100
597	2014	0.158008	15.8008	3	2.07944	0.0856434	0	0	0	2.55	0.2027	1	0.726757	1.60944	1.79176	C27	医药制造业	辽宁省	210000	沈阳市	210100
597	2015	0.152633	15.2633	2	1.09861	0.0859143	9.38	0	0	2.91	0.3865	1	-0.130439	1.09861	2.70805	C27	医药制造业	辽宁省	210000	沈阳市	210100
597	2016	0.152672	15.2672	2	1.09861	0.0764113	11.68	0	0	2.686	0.3323	1	0.013743	1.09861	2.89037	C27	医药制造业	辽宁省	210000	沈阳市	210100
597	2017	0.149999	14.9999	1	1.79176	0.0696018	9.96	0	0	3.03	0.2961	1	0.046839	1.94591	2.3979	C27	医药制造业	辽宁省	210000	沈阳市	210100
597	2018	0.0880566	8.80566	2	1.38629	0.0596175	11.45	0	0	3.11	0.2487	0	0.410054	2.30259	2.3979	C27	医药制造业	辽宁省	210000	沈阳市	210100
597	2019	0.0884462	8.84462	1	2.56495	0.0554835	8.86	0	0	3.16	0.2782	0	0.090455	2.19722	2.48491	C27	医药制造业	辽宁省	210000	沈阳市	210100
597	2020	0.0840108	8.40108	1	1.94591	0.0561451	11.44	0	0	3.16	0.3909	0	0.052166	2.30259	1.79176	C27	医药制造业	辽宁省	210000	沈阳市	210100
597	2021	0.0679378	6.79378	1	0.693147	0.0494525	11.19	0	0	3.24	0.3418	0	0.040772	2.63906	1.38629	C27	医药制造业	辽宁省	210000	沈阳市	210100
597	2022	0.0741789	7.41789	1	1.60944	0.0511909	11.32	0	0	3.39	0.318	0	0.09859	2.07944	1.60944	C27	医药制造业	辽宁省	210000	沈阳市	210100
597	2023	0.0617868	6.17868	1	1.38629	0.0446372	12.41	0	0	3.57	0.2766	0	0.094506	1.79176	0.693147	C27	医药制造业	辽宁省	210000	沈阳市	210100
605	2013	0.0252583	2.52583	1	0.693147	0.0930931	0	0	0	3.2258	0.0679	0	4.58923	0.693147	0	C27	医药制造业	北京市	110000	北京市	110000
607	2012	0.0492804	4.92804	1	2.56495	0.0738763	0	0	0	2.06	0.225	0	0.059996	0.693147	0	C40	仪器仪表制造业	浙江省	330000	杭州市	330100
607	2013	0.0462096	4.62096	1	2.30259	0.0751608	0	0	0	1.9795	0.2201	0	0.066221	0.693147	0	C40	仪器仪表制造业	浙江省	330000	杭州市	330100
607	2014	0.060099	6.0099	1	4.29046	0.0096825	0	0	0	1.55	0.129	0	0.657358	0.693147	0	C40	仪器仪表制造业	浙江省	330000	杭州市	330100
615	2011	0.12233	12.233	3	0	0.11993	0	0	0	0	0.2204	1	-0.143219	1.60944	0	C28	化学纤维制造业	湖北省	420000	襄阳市	420600
615	2012	0.131443	13.1443	3	0	0.094009	0	0	0	0	0.1894	1	0.031588	2.07944	1.09861	C28	化学纤维制造业	湖北省	420000	襄阳市	420600
615	2013	0.137875	13.7875	3	0	0.111843	0	0	0	0	0.2305	1	-0.048323	1.60944	2.19722	C28	化学纤维制造业	湖北省	420000	襄阳市	420600
615	2014	0.186631	18.6631	3	0	0.0881752	0	0.693147	11.1111	0	0.232	1	0.286625	2.19722	2.30259	C28	化学纤维制造业	湖北省	420000	襄阳市	420600
615	2015	0.146009	14.6009	3	0.693147	0.0216162	11.78	0	0	0	0.067	1	0.162039	1.79176	2.48491	C28	化学纤维制造业	湖北省	420000	襄阳市	420600
617	2011	0.0388622	3.88622	3	0	0.0384338	0	0	0	0	0.2087	0	-0.123527	0.693147	0	C34	通用设备制造业	山东省	370000	济南市	370100
617	2012	0.0467953	4.67953	3	0	0.0569413	0	0	0	0	0.2337	0	-0.063239	1.38629	0	C34	通用设备制造业	山东省	370000	济南市	370100
617	2014	0.047685	4.7685	4	0	0.0614932	0	0	0	0	0.263	0	-0.156152	0	0	C34	通用设备制造业	山东省	370000	济南市	370100
617	2015	0.0375093	3.75093	3	0	0.0550165	2.7	0	0	0	0.2505	0	-0.120063	0	0	C34	通用设备制造业	山东省	370000	济南市	370100
622	2013	0.083847	8.38471	1	0	0.129387	0	0	0	1.7143	0.0998	1	0.043816	0	0	C35	专用设备制造业	湖南省	430000	岳阳市	430600
622	2014	0.086714	8.6714	1	0	0.173462	0	0	0	2.04	0.0997	1	-0.152666	0	0	C35	专用设备制造业	湖南省	430000	岳阳市	430600
622	2015	0.093575	9.3575	1	0	0.20825	5	0	0	2.04	0.1318	1	-0.235571	0	0	C35	专用设备制造业	湖南省	430000	岳阳市	430600
622	2017	0.0808518	8.08518	1	0	0	7.3	0	0	2.59	0.0508	1	-0.067527	0	0	C35	专用设备制造业	湖南省	430000	岳阳市	430600
622	2018	0.0874043	8.74043	1	0	0	8.11	0	0	2.7	0.0493	1	0.025699	0.693147	0	C35	专用设备制造业	湖南省	430000	岳阳市	430600
622	2019	0.0819669	8.19669	1	0	0	8.13	0	0	2.92	0.0542	1	0.052367	0	0	C35	专用设备制造业	湖南省	430000	岳阳市	430600
622	2020	0.088559	8.8559	1	0.693147	0	7.52	0	0	3.01	0.0384	1	-0.006405	0	0	C35	专用设备制造业	湖南省	430000	岳阳市	430600
622	2021	0.0911104	9.11104	1	0	0.0352036	7.75	0	0	3.1	0	1	0.005068	1.09861	0	C35	专用设备制造业	湖南省	430000	岳阳市	430600
622	2022	0.10037	10.037	1	0.693147	0.0357931	9.02	0	0	3.76	0	1	-0.06177	1.09861	0	C35	专用设备制造业	湖南省	430000	岳阳市	430600
622	2023	0.0359847	3.59847	1	1.09861	0.0285295	16.8	0	0	3.76	0	0	-0.057015	0.693147	0	C35	专用设备制造业	湖南省	430000	岳阳市	430600
623	2011	0.0365875	3.65875	2	1.09861	0.016405	0	0	0	0	0.0769	0	0.255198	1.09861	0	C27	医药制造业	吉林省	220000	敦化市	222403
623	2012	0.04224	4.224	2	0.693147	0.0201281	0	0	0	0.59	0.0985	0	0.072407	2.07944	0	C27	医药制造业	吉林省	220000	敦化市	222403
623	2013	0.0516046	5.16046	3	0.693147	0.0187548	0	0	0	0.8399	0.1069	0	0.092509	1.79176	0	C27	医药制造业	吉林省	220000	敦化市	222403
623	2014	0.0297764	2.97764	2	0	0.0198341	0	0	0	0.81	0.1176	0	0.140418	1.38629	0	C27	医药制造业	吉林省	220000	敦化市	222403
623	2015	0.0350748	3.50748	2	0	0.0175248	3.92	0	0	0.98	0.0906	0	0.389015	1.79176	0	C27	医药制造业	吉林省	220000	敦化市	222403
623	2016	0.0322296	3.22296	2	0	0.0158212	4.03	0	0	1.05	0.1046	0	0.073389	1.38629	0	C27	医药制造业	吉林省	220000	敦化市	222403
623	2017	0.0414121	4.14121	2	0	0.0136691	5.31	0	0	1.16	0.0956	0	0.088089	2.3979	0	C27	医药制造业	吉林省	220000	敦化市	222403
623	2018	0.0566002	5.66002	2	1.38629	0.0136008	6.36	0	0	0.97	0.0839	0	0.035621	2.3979	0	C27	医药制造业	吉林省	220000	敦化市	222403
623	2019	0.0478812	4.78812	2	0.693147	0.0120671	6.03	0	0	0.98	0.0829	0	0.0565	2.30259	0	C27	医药制造业	吉林省	220000	敦化市	222403
623	2020	0.0521198	5.21199	2	1.38629	0.012044	6.1	0	0	0.9	0.0768	0	0.048323	1.94591	0	C27	医药制造业	吉林省	220000	敦化市	222403
623	2021	0.0343344	3.43344	1	1.09861	0.0123716	5.46	0	0	1.06	0.0704	0	0.064153	1.60944	0	C27	医药制造业	吉林省	220000	敦化市	222403
623	2022	0.0257465	2.57465	1	0	0.0117117	5.15	0	0	0.85	0.0676	0	0.051975	2.07944	0	C27	医药制造业	吉林省	220000	敦化市	222403
623	2023	0.0445014	4.45015	1	1.94591	0.0134923	5.12	0	0	0.83	0.066	0	0.04412	1.79176	0	C27	医药制造业	吉林省	220000	敦化市	222403
625	2011	0.219207	21.9207	1	0	0.0498766	0	2.63906	2.76009	5.39	0.2065	1	0.361549	0.693147	6.15698	C37	铁路、船舶、航空航天和其它运输设备制造业	重庆市	500000	重庆市	500000
625	2012	0.241086	24.1086	3	0	0.0462547	0	2.77259	3.87597	4.3	0.2521	1	0.050674	0	5.96101	C36	汽车制造业	重庆市	500000	重庆市	500000
625	2013	0.219191	21.9191	3	0.693147	0.0385787	0	1.94591	1.54242	3.9479	0.2575	1	0.2111	0	5.96615	C36	汽车制造业	重庆市	500000	重庆市	500000
625	2014	0.156692	15.6692	2	1.09861	0.0413126	0	0	0	3.48	0.209	1	0.359891	0.693147	5.96871	C36	汽车制造业	重庆市	500000	重庆市	500000
625	2015	0.231151	23.1151	3	1.79176	0.0317996	11.83	1.60944	1	4.44	0.1556	1	0.342489	0.693147	5.99396	C36	汽车制造业	重庆市	500000	重庆市	500000
625	2016	0.151371	15.1371	1	1.38629	0.0323438	16.13	1.94591	0.702576	5	0.1453	0	0.268615	0.693147	6.7511	C36	汽车制造业	重庆市	500000	重庆市	500000
625	2017	0.270749	27.0749	2	2.70805	0.0381431	18.34	2.48491	1.53417	5.29	0.1795	1	0.094803	1.09861	6.57647	C36	汽车制造业	重庆市	500000	重庆市	500000
625	2018	0.260816	26.0816	1	2.77259	0.0536775	21.43	2.30259	1.47059	6.83	0.237	1	-0.027606	1.09861	6.41836	C36	汽车制造业	重庆市	500000	重庆市	500000
625	2019	0.263066	26.3066	1	2.3979	0.0533679	21.3	2.56495	1.86916	6.49	0.276	1	-0.048076	0.693147	6.46615	C36	汽车制造业	重庆市	500000	重庆市	500000
625	2020	0.286595	28.6595	2	3.09104	0.0409048	16.47	2.77259	2.5729	5.12	0.2186	1	0.217285	1.38629	6.3699	C36	汽车制造业	重庆市	500000	重庆市	500000
625	2021	0.275344	27.5344	2	2.63906	0.0323918	17.13	2.70805	2.0202	5.45	0.1575	1	0.044613	1.09861	6.54247	C36	汽车制造业	重庆市	500000	重庆市	500000
625	2022	0.314645	31.4645	2	2.83321	0.0304446	18.42	3.61092	2.69058	6.26	0.1325	1	0.126777	1.60944	7.19968	C36	汽车制造业	重庆市	500000	重庆市	500000
625	2023	0.276287	27.6287	3	2.48491	0.0791159	22.34	4.14314	3.66647	8.91	0.1051	0	0.186403	1.38629	7.43367	C36	汽车制造业	重庆市	500000	重庆市	500000
627	2011	0.0670963	6.70963	4	0	0.20322	0	0	0	0	0.1889	0	-0.117297	1.09861	0.693147	C26	化学原料及化学制品制造业	湖北省	420000	荆门市	420800
627	2012	0.0459464	4.59464	3	0	0.181494	0	0	0	0.2	0.1761	0	0.08713	0.693147	0	C26	化学原料及化学制品制造业	湖北省	420000	荆门市	420800
627	2013	0.0541639	5.41639	3	0	0.168535	0	0	0	0.1977	0.2788	0	-0.065773	0.693147	0.693147	C26	化学原料及化学制品制造业	湖北省	420000	荆门市	420800
627	2014	0.0523089	5.23089	3	0.693147	0.238974	0	0	0	0.1333	0.2146	0	0.050608	0	0	C26	化学原料及化学制品制造业	湖北省	420000	荆门市	420800
627	2015	0.117407	11.7408	3	0	0.203573	9.1	0	0	0.7	0.1342	1	0.197332	0	0	C26	化学原料及化学制品制造业	湖北省	420000	荆门市	420800
633	2013	0.0916097	9.16098	1	0	0.0542761	0	0	0	3.7594	0.3465	1	-0.000622	0	0	C38	电气机械及器材制造业	辽宁省	210000	沈阳市	210100
633	2014	0.116637	11.6637	1	0.693147	0.0608484	0	0	0	3.1	0.4524	1	-0.127409	1.60944	0	C38	电气机械及器材制造业	辽宁省	210000	沈阳市	210100
633	2015	0.120275	12.0275	1	0.693147	0.0698383	0	0	0	4.13	0.5021	1	-0.188575	1.60944	0	C38	电气机械及器材制造业	辽宁省	210000	沈阳市	210100
633	2017	0.0537529	5.37529	1	2.30259	0.0150148	0	0	0	4.44	0.1023	0	-0.134523	2.19722	0	C38	电气机械及器材制造业	新疆维吾尔自治区	650000	和田市	653201
633	2018	0.026518	2.6518	1	0	0.0138476	0	0	0	2.85	0.0956	0	0.008099	2.19722	0	C38	电气机械及器材制造业	新疆维吾尔自治区	650000	和田市	653201
633	2019	0.025992	2.5992	1	0	0.0126675	0	0	0	2.79	0.0856	0	0.100432	2.19722	0	C38	电气机械及器材制造业	新疆维吾尔自治区	650000	和田市	653201
635	2011	0.0812923	8.12923	4	0	0.0218424	0	0	0	0.06	0.7521	0	0.075533	1.94591	0	C26	化学原料及化学制品制造业	宁夏回族自治区	640000	石嘴山市	640200
635	2012	0.0722243	7.22243	4	0	0.0244256	0	0	0	0.06	0.7877	0	1.48164	0.693147	0	C26	化学原料及化学制品制造业	宁夏回族自治区	640000	石嘴山市	640200
635	2013	0.0722741	7.22741	3	0	0.0248502	0	0	0	0.07	0.7505	0	0.023809	2.19722	0	C26	化学原料及化学制品制造业	宁夏回族自治区	640000	石嘴山市	640200
635	2014	0.0859905	8.59905	4	0	0.02778	0	0	0	0.08	0.8081	0	0.008714	2.19722	0	C26	化学原料及化学制品制造业	宁夏回族自治区	640000	石嘴山市	640200
635	2015	0.0423437	4.23437	2	0	0.0264091	0.78	0	0	0.12	0.7333	0	0.009129	0	0	C26	化学原料及化学制品制造业	宁夏回族自治区	640000	石嘴山市	640200
635	2016	0.0744637	7.44637	4	0	0.0248024	0.69	0	0	0.09	0.6334	0	0.036468	1.60944	0	C26	化学原料及化学制品制造业	宁夏回族自治区	640000	石嘴山市	640200
635	2017	0.0871407	8.71407	4	0.693147	0.0234568	0	0	0	0.09	0.5556	0	0.031226	2.63906	0	C26	化学原料及化学制品制造业	宁夏回族自治区	640000	石嘴山市	640200
635	2018	0.0788068	7.88068	4	0	0.0248565	1.34	0	0	0.05	0.5625	0	-0.114087	2.3979	0	C26	化学原料及化学制品制造业	宁夏回族自治区	640000	石嘴山市	640200
635	2019	0.0953783	9.53783	5	0	0.0240823	1.33	0	0	0.32	0.5128	0	0.010147	2.30259	1.09861	C26	化学原料及化学制品制造业	宁夏回族自治区	640000	石嘴山市	640200
635	2020	0.0755053	7.55053	4	0	0.0227582	0.24	0	0	0.33	0.4575	0	0.009667	2.56495	0	C26	化学原料及化学制品制造业	宁夏回族自治区	640000	石嘴山市	640200
635	2021	0.182568	18.2568	2	0	0.0225134	0.92	1.79176	26.3158	0.05	0.4489	0	-0.014739	2.48491	2.99573	C26	化学原料及化学制品制造业	宁夏回族自治区	640000	石嘴山市	640200
635	2022	0.0690853	6.90853	2	0	0.0242551	0.89	0	0	0.05	0.482	0	-0.146241	2.3979	2.30259	C26	化学原料及化学制品制造业	宁夏回族自治区	640000	石嘴山市	640200
635	2023	0.0702758	7.02757	2	0.693147	0.023877	2.37	0	0	0.05	0.5044	0	-0.294266	1.60944	2.07944	C26	化学原料及化学制品制造业	宁夏回族自治区	640000	石嘴山市	640200
636	2011	0.0899953	8.99953	1	1.09861	0.0551132	0	0.693147	4.34783	0.37	0.3325	0	-0.076592	1.09861	3.17805	C39	计算机、通信和其他电子设备制造业	广东省	440000	肇庆市	441200
636	2012	0.100051	10.0051	1	2.30259	0.0551964	0	0.693147	3.22581	0.55	0.3475	0	-0.043781	0.693147	3.46574	C39	计算机、通信和其他电子设备制造业	广东省	440000	肇庆市	441200
636	2013	0.122084	12.2084	1	1.09861	0.0286141	0	0	0	0.595	0.2986	1	0.052193	0	3.58352	C39	计算机、通信和其他电子设备制造业	广东省	440000	肇庆市	441200
636	2014	0.148977	14.8977	1	1.38629	0.027406	0	0.693147	3.57143	0.69	0.2348	1	0.628641	0	3.3673	C39	计算机、通信和其他电子设备制造业	广东省	440000	肇庆市	441200
636	2015	0.137376	13.7376	1	2.19722	0.0229725	10.19	0	0	0.8	0.2426	1	0.270037	0	3.33221	C39	计算机、通信和其他电子设备制造业	广东省	440000	肇庆市	441200
636	2016	0.0877375	8.77375	1	1.38629	0.0207209	11.09	0.693147	4.16667	1.0228	0.2621	0	-0.055367	0	3.21888	C39	计算机、通信和其他电子设备制造业	广东省	440000	肇庆市	441200
636	2017	0.115214	11.5214	1	2.30259	0.0193928	10.99	0.693147	2.17391	0.61	0.3321	0	0.013645	1.79176	3.85015	C39	计算机、通信和其他电子设备制造业	广东省	440000	肇庆市	441200
636	2018	0.0885958	8.85958	1	2.30259	0.0157685	14.89	0	0	0.63	0.3081	0	0.20675	1.60944	3.55535	C39	计算机、通信和其他电子设备制造业	广东省	440000	肇庆市	441200
636	2019	0.0911563	9.11563	1	2.19722	0.0147212	19.35	0	0	0.71	0.3047	0	0.013904	1.60944	3.63759	C39	计算机、通信和其他电子设备制造业	广东省	440000	肇庆市	441200
636	2020	0.116747	11.6746	1	2.48491	0.0276027	17.2	0.693147	2.17391	0.92	0.2729	0	0.075111	1.38629	3.85015	C39	计算机、通信和其他电子设备制造业	广东省	440000	肇庆市	441200
636	2021	0.149771	14.9771	1	1.60944	0.020805	13.91	0	0	2.07	0.2912	1	0.167925	1.09861	3.82864	C39	计算机、通信和其他电子设备制造业	广东省	440000	肇庆市	441200
636	2022	0.195068	19.5068	2	1.79176	0.0180747	15	0.693147	1.66667	2.32	0.2819	1	0.696366	1.79176	4.11087	C39	计算机、通信和其他电子设备制造业	广东省	440000	肇庆市	441200
636	2023	0.141301	14.1301	4	1.79176	0.0182596	14.46	0.693147	2.94118	2.04	0.3336	0	0.005911	1.09861	3.55535	C39	计算机、通信和其他电子设备制造业	广东省	440000	肇庆市	441200
650	2011	0.0312573	3.12573	1	1.09861	0.159796	0	0	0	0.41	0.0966	0	0.252246	0.693147	0	C27	医药制造业	江西省	360000	樟树市	360982
650	2012	0.0241845	2.41845	1	0	0.199577	0	0	0	0.66	0.1564	0	0.356837	0.693147	0	C27	医药制造业	江西省	360000	南昌市	360100
650	2013	0.022674	2.2674	1	0	0.181325	0	0	0	0.8407	0.1393	0	0.132465	0.693147	0	C27	医药制造业	江西省	360000	南昌市	360100
650	2014	0.0354946	3.54946	1	1.09861	0.153484	0	0	0	0.93	0.1985	0	0.115115	0.693147	0	C27	医药制造业	江西省	360000	南昌市	360100
650	2015	0.0591454	5.91454	1	3.3673	0.118954	2.05	0	0	0.92	0.1835	0	0.202962	0.693147	0	C27	医药制造业	江西省	360000	南昌市	360100
650	2016	0.0521784	5.21784	1	2.48491	0.0971967	3.61	0	0	0.66	0.1734	0	0.232086	1.09861	0	C27	医药制造业	江西省	360000	南昌市	360100
650	2017	0.0559776	5.59776	1	2.94444	0.0899823	3.35	0	0	0.58	0.1603	0	0.083621	1.09861	0	C27	医药制造业	江西省	360000	南昌市	360100
650	2018	0.0385868	3.85867	1	1.09861	0.0780842	3.1	0	0	0.76	0.1357	0	0.127443	1.60944	0	C27	医药制造业	江西省	360000	南昌市	360100
650	2019	0.0333653	3.33653	1	0.693147	0.0719995	3.67	0	0	0.86	0.1107	0	0.111615	1.60944	0	C27	医药制造业	江西省	360000	南昌市	360100
650	2020	0.0359163	3.59163	1	1.09861	0.0565845	4.11	0	0	0.73	0.081	0	0.289194	1.60944	0	C27	医药制造业	江西省	360000	南昌市	360100
650	2021	0.0682717	6.82717	1	4.00733	0.0496152	3.83	0	0	0.65	0.0759	0	0.051001	1.79176	0	C27	医药制造业	江西省	360000	南昌市	360100
650	2022	0.0640932	6.40932	1	3.52636	0.076375	3.98	0	0	0.43	0.1073	0	0.0835	1.60944	0	C27	医药制造业	江西省	360000	南昌市	360100
650	2023	0.0630336	6.30336	1	3.21888	0.0565133	4.02	0	0	0.43	0.1208	0	0.036236	1.94591	0	C27	医药制造业	江西省	360000	樟树市	360982
651	2011	0.258969	25.8969	4	0	0.0190369	0	2.70805	1.49733	0.56	0.0905	1	0.311557	2.30259	6.84162	C38	电气机械及器材制造业	广东省	440000	珠海市	440400
651	2012	0.275551	27.5551	3	0	0.0152024	0	3.43399	2.57954	0.54	0.1181	1	0.500787	2.56495	7.05962	C38	电气机械及器材制造业	广东省	440000	珠海市	440400
651	2013	0.299887	29.9887	3	1.38629	0.0177273	0	3.61092	3.27273	0.6875	0.105	1	0.285947	2.94444	7.00397	C38	电气机械及器材制造业	广东省	440000	珠海市	440400
651	2014	0.290535	29.0535	3	3.63759	0.0158758	0	4.7185	5.08242	1.06	0.0956	0	0.275846	2.48491	7.68937	C38	电气机械及器材制造业	广东省	440000	珠海市	440400
651	2015	0.285672	28.5672	4	3.17805	0.0164266	0	4.47734	4.27939	0	0.0954	0	0.076114	2.3979	7.61776	C38	电气机械及器材制造业	广东省	440000	珠海市	440400
651	2016	0.30346	30.346	4	2.77259	0.0183982	0	5.12396	5.07445	0	0.097	0	0.130892	2.19722	8.09925	C38	电气机械及器材制造业	广东省	440000	珠海市	440400
651	2017	0.314457	31.4457	5	2.48491	0.0167675	0	5.15906	4.89253	0	0.0813	0	0.216236	2.48491	8.17103	C38	电气机械及器材制造业	广东省	440000	珠海市	440400
651	2018	0.356953	35.6953	6	3.58352	0.0207157	13.3	5.49717	4.92102	0	0.0732	0	0.386809	2.19722	8.50492	C38	电气机械及器材制造业	广东省	440000	珠海市	440400
651	2019	0.382602	36.9914	7	3.85015	0.0187493	16.04	5.76205	5.32236	0	0.0676	0	0.210057	2.19722	8.69232	C38	电气机械及器材制造业	广东省	440000	珠海市	440400
651	2020	0.389971	36.9914	6	3.61092	0.0210527	17.22	6.23441	6.89889	0	0.068	0	0.043132	2.3979	8.90639	C38	电气机械及器材制造业	广东省	440000	珠海市	440400
651	2021	0.339764	33.9764	2	3.7612	0.0310295	17.38	6.16542	6.38698	0	0	0	-0.076617	2.19722	8.91436	C38	电气机械及器材制造业	广东省	440000	珠海市	440400
651	2022	0.399001	36.9914	2	3.7612	0.0327353	17.93	5.82008	5.16923	0	0	1	-0.056052	2.3979	8.77971	C38	电气机械及器材制造业	广东省	440000	珠海市	440400
651	2023	0.32081	32.081	3	2.70805	0.0294188	21.05	5.56834	5.57097	0	0	0	0.184245	2.30259	8.45233	C38	电气机械及器材制造业	广东省	440000	珠海市	440400
661	2011	0.0117784	1.22037	1	0	0.0718889	0	0	0	0	0.1947	0	0.17698	0	0	C27	医药制造业	吉林省	220000	长春市	220100
661	2012	0.0269936	2.69936	1	0	0.064349	0	0	0	6.38	0.2574	0	0.377994	0.693147	0	C27	医药制造业	吉林省	220000	长春市	220100
661	2013	0.0217582	2.17582	1	0	0.0489528	0	0	0	7.8872	0.2528	0	0.3066	0	0	C27	医药制造业	吉林省	220000	长春市	220100
661	2014	0.0199604	1.99604	1	0	0.0444003	0	0	0	7.506	0.2248	0	0.200637	0	0	C27	医药制造业	吉林省	220000	长春市	220100
661	2015	0.108253	10.8253	1	0.693147	0.0470813	13.96	0	0	8.81	0.1841	1	0.191023	0	0	C27	医药制造业	吉林省	220000	长春市	220100
661	2016	0.104381	10.4381	1	0.693147	0.0319609	12.06	0	0	9.618	0.1186	1	0.827566	0	0	C27	医药制造业	吉林省	220000	长春市	220100
661	2017	0.0978501	9.78501	1	0	0.0229304	11.27	0	0	10.3403	0.1518	1	0.168497	0	0	C27	医药制造业	吉林省	220000	长春市	220100
661	2018	0.0258186	2.58186	1	0	0.0249308	10.31	0	0	10.45	0.1265	0	0.216463	0	0	C27	医药制造业	吉林省	220000	长春市	220100
661	2019	0.0976523	9.76523	1	0	0.0218805	12.63	0	0	10.48	0.119	1	0.392279	0	0	C27	医药制造业	吉林省	220000	长春市	220100
661	2020	0.102521	10.2521	1	0	0.0597894	10.89	0	0	14	0.118	1	0.399163	0	0	C27	医药制造业	吉林省	220000	长春市	220100
661	2021	0.116365	11.6365	2	0	0.0624804	12.14	0	0	15.99	0.0987	1	0.398725	0	0	C27	医药制造业	吉林省	220000	长春市	220100
661	2022	0.131163	13.1163	3	0	0.0593041	12.96	0	0	17.85	0.124	1	0.207096	0	0	C27	医药制造业	吉林省	220000	长春市	220100
661	2023	0.0869281	8.69281	4	1.09861	0.0560747	14.72	0	0	19.62	0.1237	0	0.203165	0	0	C27	医药制造业	吉林省	220000	长春市	220100
663	2016	0.123569	12.3569	3	1.38629	0.0302803	3.28	0	0	0	0.0864	1	0.057505	0	1.09861	C21	家具制造业	福建省	350000	永安市	350481
663	2017	0.157872	15.7872	3	2.19722	0.0305444	3.16	0	0	0	0.1952	1	0.025611	1.79176	1.94591	C21	家具制造业	福建省	350000	永安市	350481
663	2018	0.161403	16.1403	5	2.63906	0.0498433	2.99	0	0	0	0.3039	1	-0.615753	0	0	C21	家具制造业	福建省	350000	永安市	350481
663	2019	0.145838	14.5838	3	2.3979	0.0525102	3.08	0	0	0	0.3049	1	-0.278384	1.09861	0	C21	家具制造业	福建省	350000	永安市	350481
663	2021	0.129347	12.9347	3	1.60944	0.027218	10.02	0	0	0	0.1249	1	0.085797	0	0.693147	C21	家具制造业	福建省	350000	永安市	350481
663	2022	0.118217	11.8217	3	1.09861	0.0315039	9.69	0	0	0	0.1083	1	0.381682	0	0	C21	家具制造业	福建省	350000	永安市	350481
663	2023	0.0549346	5.49346	3	1.60944	0.054941	12.89	0	0	0	0.0596	0	0.206654	0	0	C21	家具制造业	福建省	350000	永安市	350481
669	2011	0.0077456	1.22037	1	0	0	0	0	0	0	0.1962	0	-0.006969	0	0	C39	计算机、通信和其他电子设备制造业	吉林省	220000	吉林市	220200
670	2014	0.122366	12.2366	1	4.14314	0.108544	0	0	0	0	0.008	1	3.81467	0	0	C39	计算机、通信和其他电子设备制造业	湖北省	420000	荆州市	421000
670	2015	0.16762	16.762	1	4.00733	0.184162	55.49	0	0	0	0.0673	1	-0.004497	0	0	C39	计算机、通信和其他电子设备制造业	湖北省	420000	荆州市	421000
670	2017	0.155763	15.5763	1	3.09104	0.0960378	47.1	0	0	0	0.3021	1	-0.466001	0	0	C39	计算机、通信和其他电子设备制造业	湖北省	420000	荆州市	421000
670	2018	0.153449	15.3449	1	2.48491	0.14606	38.46	0	0	0	0.4982	1	-0.45921	0	0	C39	计算机、通信和其他电子设备制造业	湖北省	420000	荆州市	421000
670	2022	0.121486	12.1486	2	2.19722	0.0048982	21.09	0	0	0	0.0019	1	0.482104	0	0	C39	计算机、通信和其他电子设备制造业	湖北省	420000	荆州市	421000
670	2023	0.018949	1.8949	2	0	0.0058266	10	0	0	0	0.0017	0	-0.033124	0	0	C39	计算机、通信和其他电子设备制造业	湖北省	420000	荆州市	421000
676	2014	0.258072	25.8072	1	0	0.0747868	0	0.693147	100	0	0.2441	0	-0.353875	0	0.693147	C38	电气机械及器材制造业	河南省	410000	郑州市	410100
676	2015	0.136686	13.6686	1	3.21888	0.0372143	14.84	0	0	0	0.3109	1	-0.029462	0.693147	0	C38	电气机械及器材制造业	河南省	410000	郑州市	410100
676	2016	0.168921	16.8921	1	4.86754	0.0687067	31.2	0	0	10.4101	0.0015	1	30.6623	0.693147	0	C38	电气机械及器材制造业	河南省	410000	郑州市	410100
677	2013	0.124424	12.4424	1	0	0.0948241	0	0	0	0.2204	0.5739	1	-0.291712	1.38629	1.94591	C28	化学纤维制造业	山东省	370000	潍坊市	370700
677	2014	0.178622	17.8622	1	0	0.101149	0	0.693147	14.2857	0.1429	0.6176	1	0.089027	1.38629	2.07944	C28	化学纤维制造业	山东省	370000	潍坊市	370700
677	2016	0.0301918	3.01918	1	0	0.103275	6.09	0	0	0.24	0.4985	0	0.025948	0	0	C28	化学纤维制造业	山东省	370000	潍坊市	370700
677	2017	0.0379809	3.79809	1	0	0.0999389	6.25	0	0	0.23	0.4611	0	0.012024	1.09861	0	C28	化学纤维制造业	山东省	370000	潍坊市	370700
677	2018	0.051886	5.1886	2	0	0.0935508	6.22	0	0	0.43	0.532	0	0.009839	1.09861	0	C28	化学纤维制造业	山东省	370000	潍坊市	370700
677	2019	0.0388655	3.88655	1	0	0.091407	6.31	0	0	0.32	0.4922	0	0.027356	1.09861	0	C28	化学纤维制造业	山东省	370000	潍坊市	370700
677	2020	0.0461709	4.61709	2	0	0.0882601	8.13	0	0	0.22	0.4529	0	0.024759	0.693147	0	C28	化学纤维制造业	山东省	370000	潍坊市	370700
677	2021	0.0346354	3.46354	2	0	0.0696332	7.69	0	0	0.24	0.3438	0	0.218821	0	0	C28	化学纤维制造业	山东省	370000	潍坊市	370700
677	2022	0.032569	3.2569	2	0	0.0615933	7.17	0	0	0.21	0.3134	0	0.122287	0	0	C28	化学纤维制造业	山东省	370000	潍坊市	370700
677	2023	0.0391028	3.91028	2	0	0.0531373	0.87	0	0	0.22	0.2595	0	0.058864	1.60944	0	C28	化学纤维制造业	山东省	370000	潍坊市	370700
678	2011	0.11392	11.392	1	0	0.0710529	0	0	0	0.41	0.2286	1	0.051189	0.693147	3.3673	C34	通用设备制造业	湖北省	420000	襄阳市	420600
678	2012	0.112079	11.2079	1	0	0.190084	0	0	0	0.41	0.1773	1	0.010081	1.38629	1.60944	C34	通用设备制造业	湖北省	420000	襄阳市	420600
678	2013	0.140014	14.0014	2	0.693147	0.140016	0	0	0	0.5089	0.2675	1	1.0678	1.38629	2.77259	C34	通用设备制造业	湖北省	420000	襄阳市	420600
678	2014	0.129697	12.9697	2	0	0.12779	0	0	0	6.06	0.354	1	0.002927	0.693147	1.94591	C34	通用设备制造业	湖北省	420000	襄阳市	420600
678	2015	0.0469519	4.69519	1	0	0.135684	5.5	0	0	0	0.395	0	-0.047474	0	2.77259	C34	通用设备制造业	湖北省	420000	襄阳市	420600
678	2016	0.0470023	4.70023	1	0	0.114071	6.03	0	0	6.72	0.3998	0	0.231422	0	1.79176	C34	通用设备制造业	湖北省	420000	襄阳市	420600
678	2017	0.0606587	6.06587	1	0	0.119593	5.88	0	0	6.61	0.4153	0	0.025707	1.09861	2.30259	C34	通用设备制造业	湖北省	420000	襄阳市	420600
678	2018	0.0587547	5.87547	1	0	0.118674	5.89	0	0	6.41	0.4383	0	-0.049037	1.09861	1.94591	C34	通用设备制造业	湖北省	420000	襄阳市	420600
678	2019	0.0697813	6.97813	2	0	0.115072	9.55	0	0	7.02	0.4531	0	0.007362	1.09861	1.38629	C34	通用设备制造业	湖北省	420000	襄阳市	420600
678	2020	0.0819422	8.19422	2	0.693147	0.115653	10.04	0	0	8.11	0.4556	0	-0.091034	1.09861	1.79176	C34	通用设备制造业	湖北省	420000	襄阳市	420600
678	2021	0.0789074	7.89074	2	0	0.117786	10.21	0	0	7.01	0.4417	0	-0.04655	1.38629	2.30259	C34	通用设备制造业	湖北省	420000	襄阳市	420600
678	2022	0.0699817	6.99817	2	0	0.108352	10.22	0	0	7.14	0.4147	0	-0.119776	0.693147	2.07944	C34	通用设备制造业	湖北省	420000	襄阳市	420600
678	2023	0.0756112	7.56112	2	0	0.119106	11.29	0	0	7.14	0.409	0	-0.041171	0.693147	2.70805	C34	通用设备制造业	湖北省	420000	襄阳市	420600
680	2011	0.111127	11.1127	4	0	0.0366317	0	0.693147	1.40845	0	0.1672	0	0.111866	1.79176	4.27667	C35	专用设备制造业	山东省	370000	济宁市	370800
680	2012	0.116683	11.6683	4	0	0.05128	0	1.09861	0.833333	0	0.1927	0	0.0112	0	5.4848	C35	专用设备制造业	山东省	370000	济宁市	370800
680	2013	0.162226	16.2227	3	0	0.0557036	0	0.693147	0.50505	0	0.1854	1	-0.029926	0	5.29331	C35	专用设备制造业	山东省	370000	济宁市	370800
680	2014	0.17618	17.618	1	0	0.0621552	0	1.60944	2.64901	0	0.2141	1	-0.005833	0.693147	5.02388	C35	专用设备制造业	山东省	370000	济宁市	370800
680	2015	0.13359	13.359	2	0.693147	0.0767719	16.46	1.38629	3.48837	0	0.252	0	-0.225564	1.09861	4.46591	C35	专用设备制造业	山东省	370000	济宁市	370800
680	2016	0.0865487	8.65487	2	0.693147	0.0719289	16.67	0	0	0	0.2234	0	0.005824	1.38629	4.35671	C35	专用设备制造业	山东省	370000	济宁市	370800
680	2017	0.178767	17.8767	2	1.60944	0.0607142	0	0.693147	2.08333	0	0.1835	1	0.029292	1.94591	3.89182	C35	专用设备制造业	山东省	370000	济宁市	370800
680	2018	0.199801	19.9801	3	1.38629	0.0652418	17.18	0.693147	0.675676	0	0.1691	1	-0.01108	1.38629	5.00395	C35	专用设备制造业	山东省	370000	济宁市	370800
680	2019	0.215456	21.5456	2	1.38629	0.0703193	19.09	1.38629	1.63934	0	0.1649	1	0.011449	1.60944	5.21494	C35	专用设备制造业	山东省	370000	济宁市	370800
680	2020	0.183404	18.3404	2	2.48491	0.0650324	21.13	0	0	0	0.1402	1	0.029017	1.60944	5.09987	C35	专用设备制造业	山东省	370000	济宁市	370800
680	2021	0.218695	21.8695	1	2.07944	0.0565322	22.23	1.60944	2.10526	0	0.108	1	0.229304	1.60944	5.25227	C35	专用设备制造业	山东省	370000	济宁市	370800
680	2022	0.244939	24.4939	2	3.33221	0.0518694	25.59	1.79176	2.6738	0	0.1226	1	0.044552	0.693147	5.23644	C35	专用设备制造业	山东省	370000	济宁市	370800
680	2023	0.156413	15.6413	2	3.17805	0.0306542	27.19	1.38629	2.7027	0	0.0982	0	0.131948	0.693147	4.7185	C35	专用设备制造业	山东省	370000	济宁市	370800
682	2012	0.175601	17.5601	3	1.38629	0.0287745	0	0	0	12.17	0.1238	1	0.040778	3.2581	2.70805	C38	电气机械及器材制造业	山东省	370000	烟台市	370600
682	2013	0.28033	28.033	3	1.79176	0.0239554	0	1.09861	33.3333	13.2008	0.1447	1	0.051899	3.17805	1.94591	C38	电气机械及器材制造业	山东省	370000	烟台市	370600
682	2014	0.294861	29.4861	3	2.07944	0.032422	0	0.693147	50	11.81	0.1508	1	0.063256	2.3979	1.09861	C38	电气机械及器材制造业	山东省	370000	烟台市	370600
682	2015	0.292202	29.2202	3	2.48491	0.0328411	21.96	1.09861	66.6667	11.08	0.147	0	0.081141	2.19722	1.38629	C38	电气机械及器材制造业	山东省	370000	烟台市	370600
682	2016	0.352724	35.2724	2	2.99573	0.0293824	26.01	2.19722	80	10.41	0.1397	0	0.06848	1.79176	2.3979	C38	电气机械及器材制造业	山东省	370000	烟台市	370600
682	2017	0.199816	19.9816	2	3.13549	0.0199402	29.05	0.693147	33.3333	11.05	0.1236	0	0.556416	1.38629	1.38629	C38	电气机械及器材制造业	山东省	370000	烟台市	370600
682	2018	0.426633	36.9914	2	2.70805	0.0185849	29.25	2.07944	87.5	10.43	0.1132	1	0.040631	1.09861	2.19722	C38	电气机械及器材制造业	山东省	370000	烟台市	370600
683	2011	0.119097	11.9097	1	0.693147	0.023008	0	0	0	0	0.5342	1	0.087223	1.60944	0.693147	C26	化学原料及化学制品制造业	内蒙古自治区	150000	鄂尔多斯市	150600
683	2012	0.107162	10.7162	1	0	0.0241467	0	0	0	0	0.3965	1	-0.020827	2.30259	0	C26	化学原料及化学制品制造业	内蒙古自治区	150000	鄂尔多斯市	150600
683	2013	0.105654	10.5654	1	0	0.0208926	0	0	0	0.5522	0.3262	1	-0.00456	2.3979	0	C26	化学原料及化学制品制造业	内蒙古自治区	150000	鄂尔多斯市	150600
683	2014	0.114645	11.4645	1	0	0.0502549	0	0	0	0.3	0.5196	1	0.169437	2.3979	0	C26	化学原料及化学制品制造业	内蒙古自治区	150000	鄂尔多斯市	150600
683	2015	0.112443	11.2443	1	0	0.0488191	1.24	0	0	0.34	0.5107	1	-0.033459	2.07944	0	C26	化学原料及化学制品制造业	内蒙古自治区	150000	鄂尔多斯市	150600
683	2016	0.135793	13.5793	1	2.30259	0.0418126	2.07	0	0	0.26	0.4378	1	0.181007	2.19722	0	C26	化学原料及化学制品制造业	内蒙古自治区	150000	鄂尔多斯市	150600
683	2017	0.0723933	7.23933	1	2.19722	0.0428601	3.86	0	0	0.31	0.4204	0	0.079059	3.09104	0	C26	化学原料及化学制品制造业	内蒙古自治区	150000	鄂尔多斯市	150600
683	2018	0.0608863	6.08863	1	1.60944	0.0377821	3.61	0	0	0.35	0.3843	0	0.11582	2.70805	0	C26	化学原料及化学制品制造业	内蒙古自治区	150000	鄂尔多斯市	150600
683	2019	0.0656326	6.56326	1	1.38629	0.0367082	4.21	0	0	0.51	0.5388	0	0.034723	2.77259	0	C26	化学原料及化学制品制造业	内蒙古自治区	150000	鄂尔多斯市	150600
683	2020	0.0626166	6.26166	1	1.09861	0.0670427	5.26	0	0	0.59	0.5574	0	-0.003642	2.3979	0	C26	化学原料及化学制品制造业	内蒙古自治区	150000	鄂尔多斯市	150600
683	2021	0.053304	5.3304	1	1.09861	0.0369938	11.2	0	0	0.65	0.3836	0	0.411555	1.79176	0	C26	化学原料及化学制品制造业	内蒙古自治区	150000	鄂尔多斯市	150600
683	2022	0.0370438	3.70438	1	1.09861	0.0280124	5.11	0	0	0.8	0.3288	0	0.189782	0.693147	0	C26	化学原料及化学制品制造业	内蒙古自治区	150000	鄂尔多斯市	150600
683	2023	0.0556618	5.56618	2	0.693147	0.0433457	5.01	0	0	0.8	0.52	0	0.072478	1.09861	0	C26	化学原料及化学制品制造业	内蒙古自治区	150000	鄂尔多斯市	150600
691	2020	0.0469372	4.69372	1	0	0.0504693	14.41	0	0	0.23	0.3483	0	1.63359	2.30259	0	C26	化学原料及化学制品制造业	甘肃省	620000	兰州市	620100
691	2021	0.0439168	4.39168	1	0	0.0464887	12.41	0	0	0.22	0.3382	0	0.295375	2.19722	0	C26	化学原料及化学制品制造业	甘肃省	620000	兰州市	620100
691	2022	0.0432725	4.32725	1	0	0.0445611	12.24	0	0	0.22	0.3534	0	0.049254	2.07944	0	C26	化学原料及化学制品制造业	甘肃省	620000	兰州市	620100
691	2023	0.0485841	4.85841	1	0	0.0456279	17.06	0	0	0.9	0.3787	0	-0.380796	2.07944	0	C26	化学原料及化学制品制造业	甘肃省	620000	兰州市	620100
697	2017	0.104346	10.4346	1	0	0.0307652	12.98	0	0	12.59	0.209	1	0.047719	0	0	C37	铁路、船舶、航空航天和其它运输设备制造业	陕西省	610000	咸阳市	610400
697	2018	0.0979558	9.79558	1	0	0.0290268	9.73	0	0	8.68	0.2216	1	0.976499	0	0	C37	铁路、船舶、航空航天和其它运输设备制造业	陕西省	610000	咸阳市	610400
697	2019	0.0396913	3.96913	1	0	0.0321203	12.26	0	0	9.5	0.2234	0	-0.506765	1.09861	0	C37	铁路、船舶、航空航天和其它运输设备制造业	陕西省	610000	咸阳市	610400
697	2020	0.0394487	3.94487	1	0	0.0618841	9.22	0	0	11.09	0.2717	0	-0.329214	0.693147	0	C37	铁路、船舶、航空航天和其它运输设备制造业	陕西省	610000	咸阳市	610400
697	2021	0.125911	12.5911	2	0	0.0591984	8.88	0	0	13.49	0.2419	1	-0.587015	1.09861	0	C37	铁路、船舶、航空航天和其它运输设备制造业	陕西省	610000	咸阳市	610400
698	2011	0.0396112	3.96112	1	0	0.0581204	0	0	0	0	0.6721	0	0.070123	0	1.38629	C26	化学原料及化学制品制造业	辽宁省	210000	沈阳市	210100
700	2011	0.1075	10.75	1	0	0.0155985	0	0	0	0	0.2155	1	0.305644	0.693147	3.04452	C36	汽车制造业	江苏省	320000	江阴市	320281
700	2012	0.10823	10.8231	1	0	0.0150842	0	0	0	0	0.219	1	0.13581	1.38629	2.30259	C36	汽车制造业	江苏省	320000	江阴市	320281
700	2013	0.0914667	9.14667	2	0	0.0157359	0	0	0	0	0.2208	1	0.139079	0	0	C36	汽车制造业	江苏省	320000	江阴市	320281
700	2014	0.0799075	7.99075	1	0	0.0149956	0	0	0	0	0.2148	1	-0.106998	0	0	C36	汽车制造业	江苏省	320000	江阴市	320281
700	2015	0.11138	11.138	1	1.09861	0.0140717	8.54	0	0	1.56	0.3103	1	0.735071	0	1.09861	C36	汽车制造业	江苏省	320000	江阴市	320281
700	2016	0.100345	10.0344	1	0.693147	0.0201899	9.17	0	0	0	0.2404	1	0.281631	0	0.693147	C36	汽车制造业	江苏省	320000	江阴市	320281
700	2017	0.0881056	8.81056	1	0	0.0204713	8.97	0	0	0	0.2501	1	-0.189754	0	0	C36	汽车制造业	江苏省	320000	江阴市	320281
700	2018	0.106704	10.6704	1	0	0.0204754	11.89	0	0	0	0.3456	1	-0.134304	0	1.79176	C36	汽车制造业	江苏省	320000	江阴市	320281
700	2019	0.106634	10.6634	1	0.693147	0.0251533	17.1	0	0	0	0.3724	1	0.022241	0	0	C36	汽车制造业	江苏省	320000	江阴市	320281
700	2020	0.101657	10.1657	1	0.693147	0.0226841	12.84	0	0	0	0.3278	1	0.155594	0	0	C36	汽车制造业	江苏省	320000	江阴市	320281
700	2021	0.121937	12.1937	2	1.38629	0.0206826	9.39	0	0	0	0.2815	1	-0.162262	0.693147	0	C36	汽车制造业	江苏省	320000	江阴市	320281
700	2022	0.142312	14.2311	2	1.38629	0.0178537	10.5	0	0	0	0.2642	1	0.293751	3.09104	0	C36	汽车制造业	江苏省	320000	江阴市	320281
700	2023	0.0765808	7.65808	2	1.09861	0.0179567	10.6	0	0	0	0.2839	0	0.167246	2.77259	1.38629	C36	汽车制造业	江苏省	320000	江阴市	320281
703	2011	0.0860788	8.60788	1	0	0.0332974	0	0	0	0	0.3448	1	0.529283	0	0	C28	化学纤维制造业	广西壮族自治区	450000	北海市	450500
703	2012	0.101321	10.1321	1	0	0.0336686	0	0	0	0	0.3447	1	-0.030443	1.79176	0	C28	化学纤维制造业	广西壮族自治区	450000	北海市	450500
703	2013	0.0991086	9.91086	1	0	0.0281457	0	0	0	0	0.3358	1	0.055143	1.60944	0	C28	化学纤维制造业	广西壮族自治区	450000	北海市	450500
703	2014	0.122374	12.2374	1	1.09861	0.0243176	0	0	0	0	0.3909	1	-0.048601	2.70805	0	C28	化学纤维制造业	广西壮族自治区	450000	北海市	450500
703	2015	0.124956	12.4956	1	1.60944	0.0243204	0	0	0	0	0.3819	1	0.187248	2.3979	0	C28	化学纤维制造业	广西壮族自治区	450000	北海市	450500
703	2016	0.0608434	6.08434	1	2.19722	0.0091977	0	0	0	0	0.2985	0	0.586648	2.89037	0	C28	化学纤维制造业	广西壮族自治区	450000	北海市	450500
703	2017	0.131028	13.1028	1	2.3979	0.0075347	0	0	0	1.94	0.2336	1	0.199595	2.63906	0	C28	化学纤维制造业	广西壮族自治区	450000	北海市	450500
703	2018	0.121064	12.1064	1	2.63906	0.0168759	1.55	0	0	2.06	0.201	1	0.260923	1.09861	0	C28	化学纤维制造业	广西壮族自治区	450000	北海市	450500
703	2019	0.139201	13.9201	1	2.19722	0.0182754	2.69	0	0	1.7	0.4549	1	0.273154	2.56495	0	C28	化学纤维制造业	广西壮族自治区	450000	北海市	450500
703	2020	0.140812	14.0812	1	2.3979	0.0193021	3.29	0	0	1.51	0.4507	1	0.025036	2.48491	0	C28	化学纤维制造业	广西壮族自治区	450000	北海市	450500
703	2021	0.15007	15.007	2	1.94591	0.0183316	3.82	0	0	1.65	0.4369	1	0.087416	2.83321	0	C28	化学纤维制造业	广西壮族自治区	450000	北海市	450500
703	2022	0.153355	15.3354	2	2.07944	0.0262451	6.81	0	0	1.41	0.4239	1	-0.007512	2.83321	0	C28	化学纤维制造业	广西壮族自治区	450000	钦州市	450700
703	2023	0.113285	11.3285	5	2.07944	0.0253057	6.61	0	0	2.05	0.4204	0	-0.021301	2.3979	0	C28	化学纤维制造业	广西壮族自治区	450000	钦州市	450700
707	2011	0.197653	19.7653	3	0	0.0734033	0	0.693147	50	0.62	0.486	0	-0.098077	1.60944	1.09861	C26	化学原料及化学制品制造业	湖北省	420000	应城市	420981
707	2012	0.287513	28.7513	3	0	0.0613276	0	1.79176	38.4615	0.51	0.4581	1	0.040435	2.07944	2.63906	C26	化学原料及化学制品制造业	湖北省	420000	应城市	420981
707	2013	0.23284	23.284	3	0	0.0483966	0	1.60944	50	0.5731	0.4008	0	-0.312204	2.30259	2.19722	C26	化学原料及化学制品制造业	湖北省	420000	应城市	420981
707	2014	0.287721	28.7721	3	0	0.0411672	0	1.60944	80	0.74	0.3514	0	-0.002318	1.60944	1.79176	C26	化学原料及化学制品制造业	湖北省	420000	应城市	420981
707	2015	0.20299	20.299	2	0	0.0362377	11.32	0.693147	25	0.84	0.3028	1	0.007267	1.38629	1.60944	C26	化学原料及化学制品制造业	湖北省	420000	应城市	420981
707	2016	0.123478	12.3478	2	0	0.0367632	10.48	0	0	0.12	0.3099	1	-0.365267	1.38629	1.09861	C26	化学原料及化学制品制造业	湖北省	420000	应城市	420981
707	2017	0.0798559	7.98559	4	0	0.0407601	8.49	0	0	0.14	0.3758	0	-0.509087	2.07944	0.693147	C26	化学原料及化学制品制造业	湖北省	420000	应城市	420981
707	2022	0.0653808	6.53808	2	0	0.124927	10.31	0	0	0.17	0.4235	0	1.48824	2.07944	0.693147	C26	化学原料及化学制品制造业	湖北省	420000	应城市	420981
707	2023	0.0666705	6.66705	2	0.693147	0.13085	13.81	0	0	0.17	0.3171	0	0.432012	2.07944	0	C26	化学原料及化学制品制造业	湖北省	420000	应城市	420981
710	2011	0.0406081	4.06081	3	0	0.0469588	0	0	0	0.92	0.214	0	0.002262	0.693147	0	C37	铁路、船舶、航空航天和其它运输设备制造业	四川省	510000	成都市	510100
710	2012	0.0200944	2.00944	1	0	0.0917349	0	0	0	1.07	0.2214	0	0.009639	0	0.693147	C36	汽车制造业	四川省	510000	成都市	510100
710	2013	0.0134708	1.34708	1	0	0.0807391	0	0	0	1.5171	0.1811	0	-0.02169	0	0	C36	汽车制造业	四川省	510000	成都市	510100
710	2014	0.0095853	1.22037	1	0	0.0362727	0	0	0	1.1204	0.158	0	0.074635	0	0	C36	汽车制造业	四川省	510000	成都市	510100
710	2015	0.021283	2.1283	1	0	0.0317406	10.09	0	0	1.51	0.1397	0	-0.094902	0	0.693147	C36	汽车制造业	四川省	510000	成都市	510100
710	2016	0.0385201	3.85201	1	0.693147	0.0282774	11.18	0	0	0.9585	0.2616	0	-0.030699	0	1.38629	C36	汽车制造业	四川省	510000	成都市	510100
725	2011	0.16532	16.532	2	0	0.0211529	0	0.693147	0.952381	9.54	0.4128	1	0.022933	0	4.66344	C39	计算机、通信和其他电子设备制造业	北京市	110000	北京市	110000
725	2012	0.196729	19.6729	2	1.09861	0.0223098	0	1.09861	1.07527	9.03	0.5146	1	0.006258	0	5.23111	C39	计算机、通信和其他电子设备制造业	北京市	110000	北京市	110000
725	2013	0.201574	20.1574	1	0	0.021893	0	2.07944	1.82292	8.6769	0.3512	1	0.081936	0	5.95324	C39	计算机、通信和其他电子设备制造业	北京市	110000	北京市	110000
725	2014	0.245415	24.5415	2	1.79176	0.0158434	0	2.3979	1.5873	9.35	0.3626	1	1.01706	0	6.44731	C39	计算机、通信和其他电子设备制造业	北京市	110000	北京市	110000
725	2015	0.272712	27.2712	2	2.63906	0.0175581	6.08	2.70805	1.60367	9.53	0.4166	1	0.01808	0	6.77308	C39	计算机、通信和其他电子设备制造业	北京市	110000	北京市	110000
725	2016	0.30186	30.186	2	3.2581	0.0152918	6.61	3.3673	2.76407	11.79	0.341	1	0.174411	0	6.92166	C39	计算机、通信和其他电子设备制造业	北京市	110000	北京市	110000
725	2017	0.336523	33.6523	2	3.58352	0.0116461	27.42	3.63759	3.20624	12.22	0.346	1	0.133327	0.693147	7.05186	C39	计算机、通信和其他电子设备制造业	北京市	110000	北京市	110000
725	2018	0.345523	34.5523	2	3.95124	0.01953	28.73	3.61092	3.20285	13.61	0.4215	1	0.154127	0.693147	7.02554	C39	计算机、通信和其他电子设备制造业	北京市	110000	北京市	110000
725	2019	0.335854	33.5854	2	3.91202	0.0217866	30.17	3.52636	2.68075	14.01	0.3695	1	0.171991	0	7.11639	C39	计算机、通信和其他电子设备制造业	北京市	110000	北京市	110000
725	2020	0.348634	34.8634	2	3.8712	0.0279923	25.76	3.8712	3.17139	11.78	0.53	1	0.229268	0	7.30182	C39	计算机、通信和其他电子设备制造业	北京市	110000	北京市	110000
725	2021	0.407958	36.9914	4	4.29046	0.0249251	24.8	4.35671	4.0569	11.69	0.5041	1	0.250727	1.94591	7.54908	C39	计算机、通信和其他电子设备制造业	北京市	110000	北京市	110000
725	2022	0.336543	33.6542	5	4.09434	0.0212768	23.86	4.26268	4.81762	10.97	0.4898	0	-0.07056	1.38629	7.28207	C39	计算机、通信和其他电子设备制造业	北京市	110000	北京市	110000
725	2023	0.283279	28.3279	4	4.18966	0.0275905	24.17	3.09104	1.5861	10.76	0.5019	0	-0.020995	1.09861	7.18917	C39	计算机、通信和其他电子设备制造业	北京市	110000	北京市	110000
727	2011	0.0187279	1.87279	1	0	0.0497293	0	0	0	0	0.4036	0	-0.009151	0	0	C39	计算机、通信和其他电子设备制造业	江苏省	320000	南京市	320100
727	2012	0.0327558	3.27557	1	0	0.0814761	0	0	0	0.55	0.408	0	-0.253584	0	1.60944	C39	计算机、通信和其他电子设备制造业	江苏省	320000	南京市	320100
727	2013	0.0322694	3.22694	2	0	0.105358	0	0	0	0.7991	0.3577	0	-0.031547	0	0	C39	计算机、通信和其他电子设备制造业	江苏省	320000	南京市	320100
727	2014	0.0438081	4.38081	1	1.38629	0.0106567	0	0	0	0.62	0.0249	0	0.036867	1.09861	2.3979	C39	计算机、通信和其他电子设备制造业	江苏省	320000	南京市	320100
727	2015	0.0265692	2.65692	1	0	0.0128348	30	0	0	2.61	0.0267	0	1.33112	0	0	C39	计算机、通信和其他电子设备制造业	江苏省	320000	南京市	320100
727	2016	0.129204	12.9204	1	0	0.031758	7.92	0	0	2.502	0.7895	1	0.00321	1.09861	1.09861	C39	计算机、通信和其他电子设备制造业	江苏省	320000	南京市	320100
727	2017	0.142662	14.2662	1	0.693147	0.0340293	25.79	0	0	2.9459	0.7303	1	0.00291	1.38629	0	C39	计算机、通信和其他电子设备制造业	江苏省	320000	南京市	320100
727	2018	0.145055	14.5055	2	0	0.0450655	22.46	0	0	4.0995	0.7086	1	-0.088543	1.38629	0	C39	计算机、通信和其他电子设备制造业	江苏省	320000	南京市	320100
727	2019	0.148928	14.8928	1	1.09861	0.052754	23.27	0	0	3.96	0.7194	1	-0.578905	1.60944	0	C39	计算机、通信和其他电子设备制造业	江苏省	320000	南京市	320100
727	2021	0.17495	17.495	4	1.94591	0.0553811	13.77	0	0	6.89	0.0968	1	0.21254	2.30259	0.693147	C39	计算机、通信和其他电子设备制造业	江苏省	320000	南京市	320100
727	2022	0.216425	21.6425	6	2.56495	0.0565245	14.08	0	0	7.28	0.12	1	0.176979	2.19722	2.30259	C39	计算机、通信和其他电子设备制造业	江苏省	320000	南京市	320100
727	2023	0.132884	13.2884	6	2.70805	0.04807	13.76	0	0	7.28	0.1226	0	0.070528	2.48491	0	C39	计算机、通信和其他电子设备制造业	江苏省	320000	南京市	320100
731	2011	0.115118	11.5118	1	1.38629	0.0568353	0	0.693147	11.1111	0	0.3324	0	0.11873	2.70805	2.30259	C26	化学原料及化学制品制造业	四川省	510000	遂宁市	510900
731	2012	0.0624206	6.24206	1	1.38629	0.0514302	0	0	0	0	0.2543	0	0.076089	2.30259	2.07944	C26	化学原料及化学制品制造业	四川省	510000	遂宁市	510900
731	2013	0.203022	20.3022	1	0.693147	0.0443023	0	1.38629	50	0	0.2148	0	0.330837	2.48491	1.94591	C26	化学原料及化学制品制造业	四川省	510000	遂宁市	510900
731	2014	0.120124	12.0124	1	0	0.0625673	0	0.693147	20	0	0.5199	0	-0.089847	2.30259	1.79176	C26	化学原料及化学制品制造业	四川省	510000	遂宁市	510900
731	2015	0.190748	19.0748	1	0	0.0547641	3.78	1.38629	42.8571	0	0.4723	0	0.022942	2.07944	2.07944	C26	化学原料及化学制品制造业	四川省	510000	遂宁市	510900
731	2016	0.0467269	4.67269	1	0	0.0665518	3.99	0	0	0	0.4717	0	-0.092179	1.94591	0.693147	C26	化学原料及化学制品制造业	四川省	510000	遂宁市	510900
731	2017	0.203418	20.3418	1	0	0.0699661	3.99	0.693147	25	0	0.59	1	0.057885	1.94591	1.60944	C26	化学原料及化学制品制造业	四川省	510000	遂宁市	510900
731	2018	0.128968	12.8968	1	0	0.0713759	4.06	0	0	0	0.57	1	0.066841	2.48491	1.09861	C26	化学原料及化学制品制造业	四川省	510000	遂宁市	510900
731	2019	0.141521	14.1521	1	1.38629	0.0751257	4.02	0	0	0	0.5736	1	0.001077	2.48491	0.693147	C26	化学原料及化学制品制造业	四川省	510000	遂宁市	510900
731	2020	0.131135	13.1135	1	1.09861	0.0689725	4.3	0	0	0	0.5008	1	0.024119	2.56495	0	C26	化学原料及化学制品制造业	四川省	510000	遂宁市	510900
731	2021	0.149145	14.9145	2	1.60944	0.045249	4.8	0	0	0	0.4101	1	0.214312	2.07944	1.38629	C26	化学原料及化学制品制造业	四川省	510000	遂宁市	510900
731	2022	0.169424	16.9424	2	1.60944	0.0361634	4.66	0.693147	33.3333	0	0.3223	0	0.191097	2.30259	1.38629	C26	化学原料及化学制品制造业	四川省	510000	遂宁市	510900
731	2023	0.0847005	8.47005	4	1.09861	0.0316271	6.61	0	0	0	0.3457	0	0.046366	2.19722	0	C26	化学原料及化学制品制造业	四川省	510000	遂宁市	510900
733	2011	0.0301706	3.01706	1	1.38629	0.0023138	0	0	0	0.68	0.2092	0	0.041618	0.693147	0	C39	计算机、通信和其他电子设备制造业	贵州省	520000	贵阳市	520100
733	2012	0.0154953	1.54954	1	0	0.0047562	0	0	0	0.96	0.2086	0	0.022887	0.693147	0	C39	计算机、通信和其他电子设备制造业	贵州省	520000	贵阳市	520100
733	2013	0.0278214	2.78214	1	0	0.0262528	0	0	0	1.6213	0.2008	0	0.025216	1.94591	0	C39	计算机、通信和其他电子设备制造业	贵州省	520000	贵阳市	520100
733	2014	0.0269198	2.69198	1	0	0.0288603	0	0	0	2.5	0.1818	0	0.243855	1.79176	0	C39	计算机、通信和其他电子设备制造业	贵州省	520000	贵阳市	520100
733	2015	0.0495359	4.95359	1	1.79176	0.0298107	5.88	0	0	1.74	0.1394	0	0.069066	1.94591	0	C39	计算机、通信和其他电子设备制造业	贵州省	520000	贵阳市	520100
733	2016	0.0452815	4.52815	1	1.60944	0.0259123	6.5	0	0	2.2	0.1354	0	0.060728	1.60944	0	C39	计算机、通信和其他电子设备制造业	贵州省	520000	贵阳市	520100
733	2017	0.0389166	3.89166	1	2.07944	0.0238986	7.3	0	0	2.71	0.1648	0	0.061318	0	0	C39	计算机、通信和其他电子设备制造业	贵州省	520000	贵阳市	520100
733	2018	0.128024	12.8024	1	2.56495	0.0210441	7.9	0	0	3.02	0.1372	1	0.156497	1.60944	0	C39	计算机、通信和其他电子设备制造业	贵州省	520000	贵阳市	520100
733	2019	0.125482	12.5482	1	2.07944	0.0217658	9.83	0	0	3.83	0.1471	1	0.047425	1.60944	0	C39	计算机、通信和其他电子设备制造业	贵州省	520000	贵阳市	520100
733	2020	0.116876	11.6876	1	1.60944	0.0193553	11.09	0	0	4.09	0.1417	1	0.109612	1.09861	0	C39	计算机、通信和其他电子设备制造业	贵州省	520000	贵阳市	520100
733	2021	0.142106	14.2106	3	1.38629	0.0145914	12.18	0	0	4.73	0.1294	1	0.245283	1.60944	0	C39	计算机、通信和其他电子设备制造业	贵州省	520000	贵阳市	520100
733	2022	0.152903	15.2903	3	2.19722	0.0116246	13.93	0	0	5.76	0.1213	1	0.311342	1.60944	0	C39	计算机、通信和其他电子设备制造业	贵州省	520000	贵阳市	520100
733	2023	0.081708	8.1708	3	2.07944	0.0088242	15.86	0	0	5.76	0.1067	0	0.471004	1.60944	0	C39	计算机、通信和其他电子设备制造业	贵州省	520000	贵阳市	520100
737	2012	0.042685	4.2685	1	0	0.107526	0	0	0	0.21	0.3618	0	0.180124	1.09861	1.79176	C26	化学原料及化学制品制造业	山西省	140000	运城市	140800
737	2013	0.0435096	4.35096	1	0	0.106581	0	0	0	0.4039	0.3936	0	-0.352728	1.60944	1.09861	C26	化学原料及化学制品制造业	山西省	140000	运城市	140800
737	2014	0.0415256	4.15256	1	0.693147	0.113406	0	0	0	0.4	0.3391	0	0.165087	0.693147	1.09861	C26	化学原料及化学制品制造业	山西省	140000	运城市	140800
737	2015	0.0541533	5.41533	1	0.693147	0.111392	6.5	0	0	0.45	0.3296	0	-0.647085	1.09861	1.79176	C26	化学原料及化学制品制造业	山西省	140000	运城市	140800
737	2016	0.0590676	5.90676	1	0.693147	0.114981	6.09	0	0	0.69	0.3399	0	0.156269	1.09861	2.3979	C26	化学原料及化学制品制造业	山西省	140000	运城市	140800
737	2021	0.0931978	9.31978	2	2.30259	0.0237	2.93	0	0	0.35	0.4093	0	0.225385	2.83321	1.79176	C26	化学原料及化学制品制造业	山西省	140000	运城市	140800
737	2022	0.0766088	7.66088	2	1.94591	0.0263638	3.17	0	0	0.49	0.3977	0	0.050501	2.83321	0	C26	化学原料及化学制品制造业	山西省	140000	运城市	140800
737	2023	0.073719	7.3719	2	1.60944	0.0279543	3.23	0	0	0.49	0.3789	0	0.064459	2.99573	0	C26	化学原料及化学制品制造业	山西省	140000	运城市	140800
738	2011	0.094082	9.4082	1	0	0.103895	0	0	0	2.53	0.2233	1	0.079449	0.693147	0	C37	铁路、船舶、航空航天和其它运输设备制造业	湖南省	430000	株洲市	430200
738	2012	0.106198	10.6198	1	0	0.0995906	0	0	0	3.59	0.207	1	0.074987	2.07944	0	C37	铁路、船舶、航空航天和其它运输设备制造业	湖南省	430000	株洲市	430200
738	2013	0.114558	11.4558	2	0	0.0712014	0	0	0	3.7638	0.143	1	0.652773	2.19722	0	C37	铁路、船舶、航空航天和其它运输设备制造业	湖南省	430000	株洲市	430200
738	2014	0.107452	10.7452	1	0	0.0629433	0	0	0	4.46	0.2412	1	0.036201	2.19722	0	C37	铁路、船舶、航空航天和其它运输设备制造业	江苏省	320000	无锡市	320200
738	2015	0.105831	10.5831	1	0	0.060882	10.29	0	0	4.55	0.2483	1	0.073633	1.09861	0	C37	铁路、船舶、航空航天和其它运输设备制造业	江苏省	320000	无锡市	320200
738	2016	0.0272025	2.72025	1	0	0.0620589	10.67	0	0	4.4547	0.2754	0	0.039502	0	0	C37	铁路、船舶、航空航天和其它运输设备制造业	江苏省	320000	无锡市	320200
738	2017	0.0309864	3.09864	1	0	0.0596399	16.57	0	0	4.64	0.261	0	0.042835	0	0	C37	铁路、船舶、航空航天和其它运输设备制造业	江苏省	320000	无锡市	320200
738	2018	0.0458063	4.58063	1	0	0.0595403	16.51	0	0	4.87	0.2843	0	0.040972	1.60944	0	C37	铁路、船舶、航空航天和其它运输设备制造业	江苏省	320000	无锡市	320200
738	2019	0.042287	4.2287	1	0	0.0668193	16.71	0	0	5.28	0.2792	0	0.049492	1.09861	0	C37	铁路、船舶、航空航天和其它运输设备制造业	江苏省	320000	无锡市	320200
738	2020	0.0568881	5.68881	1	0	0.0603284	17.55	0	0	6.31	0.2524	0	0.07764	2.77259	0	C37	铁路、船舶、航空航天和其它运输设备制造业	江苏省	320000	无锡市	320200
738	2021	0.121268	12.1268	1	0	0.0559396	16.01	0	0	6.73	0.1791	1	0.568621	2.48491	0	C37	铁路、船舶、航空航天和其它运输设备制造业	江苏省	320000	无锡市	320200
738	2022	0.148248	14.8248	2	1.38629	0.0543488	15.79	0	0	6.75	0.1671	1	0.075305	2.63906	0	C37	铁路、船舶、航空航天和其它运输设备制造业	江苏省	320000	无锡市	320200
738	2023	0.0843035	8.43035	4	0	0.0512301	14.98	0	0	7.26	0.1847	0	0.062317	2.48491	0	C37	铁路、船舶、航空航天和其它运输设备制造业	江苏省	320000	无锡市	320200
739	2011	0.115191	11.5191	2	0	0.128779	0	0	0	3.82	0.4001	1	-0.002355	0.693147	0	C27	医药制造业	山东省	370000	青岛市	370200
739	2012	0.1074	10.74	2	0	0.102058	0	0	0	0	0.3513	1	0.108877	0.693147	0	C27	医药制造业	山东省	370000	青岛市	370200
739	2013	0.10889	10.889	2	0	0.0958183	0	0	0	0	0.3103	1	0.360474	1.09861	0	C27	医药制造业	浙江省	330000	东阳市	330783
739	2014	0.0952002	9.52002	1	0	0.0827853	0	0	0	0	0.3555	1	0.241204	0.693147	0	C27	医药制造业	浙江省	330000	东阳市	330783
739	2015	0.0942326	9.42326	1	0	0.0786695	6.8	0	0	0	0.3616	1	0.04807	0	0	C27	医药制造业	浙江省	330000	东阳市	330783
739	2016	0.0943722	9.43722	1	0	0.0713386	6.34	0	0	0	0.3842	1	0.082632	0	0	C27	医药制造业	浙江省	330000	东阳市	330783
739	2017	0.113552	11.3552	1	0.693147	0.0661843	7.14	0	0	0	0.3726	1	0.16568	1.38629	0	C27	医药制造业	浙江省	330000	东阳市	330783
739	2018	0.0318787	3.18787	1	0	0.0596719	7.76	0	0	0	0.3429	0	0.096489	1.09861	0	C27	医药制造业	浙江省	330000	东阳市	330783
739	2019	0.0377635	3.77635	2	0	0.0507791	8.59	0	0	0	0.2911	0	0.126366	0.693147	0	C27	医药制造业	浙江省	330000	东阳市	330783
739	2020	0.0393767	3.93767	2	0	0.0453511	9.08	0	0	0	0.2432	0	0.165258	1.09861	0	C27	医药制造业	浙江省	330000	东阳市	330783
739	2021	0.0727594	7.27594	1	2.30259	0.0403094	14.35	0	0	5.48	0.2108	0	0.152444	2.3979	0	C27	医药制造业	浙江省	330000	东阳市	330783
739	2022	0.133276	13.3277	1	1.38629	0.028205	15.11	0	0	5.5	0.2552	1	0.090755	2.19722	0	C27	医药制造业	浙江省	330000	东阳市	330783
739	2023	0.130991	13.0991	1	1.09861	0.0250473	16.72	0	0	6.95	0.2351	1	0.128857	2.07944	0	C27	医药制造业	浙江省	330000	东阳市	330783
755	2011	0.0590763	5.90763	4	0	0.0165878	0	0	0	1.08	0.4362	0	0.019839	0.693147	0	C26	化学原料及化学制品制造业	山西省	140000	临汾市	141000
755	2012	0.0877828	8.77828	4	0.693147	0.0227413	0	0	0	0.73	0.5793	0	-0.157425	1.94591	0.693147	C26	化学原料及化学制品制造业	山西省	140000	临汾市	141000
755	2013	0.092388	9.2388	4	1.09861	0.0232284	0	0	0	0.7534	0.7079	0	-0.246741	1.94591	0	C26	化学原料及化学制品制造业	山西省	140000	临汾市	141000
755	2015	0.102823	10.2823	4	0.693147	0.0246466	11.55	0	0	1.01	0.6649	0	-0.299935	1.94591	1.09861	C26	化学原料及化学制品制造业	山西省	140000	临汾市	141000
755	2016	0.118521	11.8521	4	1.09861	0.0276309	12.14	0	0	1.0085	0.6864	0	-0.57104	1.94591	2.48491	C26	化学原料及化学制品制造业	山西省	140000	临汾市	141000
755	2018	0.102002	10.2002	4	0	0.890131	0	0	0	0.86	0.0009	0	-0.535917	1.94591	0	C26	化学原料及化学制品制造业	山西省	140000	临汾市	141000
756	2011	0.178957	17.8957	1	0	0.0743974	0	0.693147	20	0	0.3539	1	0.020533	1.60944	1.79176	C27	医药制造业	山东省	370000	淄博市	370300
756	2012	0.127047	12.7047	2	0	0.0710748	0	0	0	0	0.3922	1	0.015574	1.09861	2.30259	C27	医药制造业	山东省	370000	淄博市	370300
756	2013	0.198435	19.8435	3	0	0.0704021	0	1.09861	10	0	0.3653	1	0.01116	1.38629	3.04452	C27	医药制造业	山东省	370000	淄博市	370300
756	2014	0.140535	14.0535	2	0	0.0737223	0	0	0	0	0.4655	1	0.015143	1.79176	2.94444	C27	医药制造业	山东省	370000	淄博市	370300
756	2015	0.191775	19.1775	3	1.38629	0.0655736	0	0.693147	4.7619	0	0.4609	1	0.037771	1.09861	3.09104	C27	医药制造业	山东省	370000	淄博市	370300
756	2016	0.155943	15.5943	2	1.79176	0.0599805	0	0	0	0	0.4491	1	0.047995	1.79176	2.56495	C27	医药制造业	山东省	370000	淄博市	370300
756	2017	0.168515	16.8514	4	1.60944	0.0613548	0	0	0	0	0.4082	1	0.240535	1.09861	2.48491	C27	医药制造业	山东省	370000	淄博市	370300
756	2018	0.128555	12.8555	1	1.60944	0.0562365	0	0	0	0	0.4447	1	0.084165	0.693147	1.94591	C27	医药制造业	山东省	370000	淄博市	370300
756	2019	0.184629	18.4629	2	1.09861	0.0639516	0	0.693147	11.1111	0	0.4361	1	0.104965	1.09861	2.30259	C27	医药制造业	山东省	370000	淄博市	370300
756	2020	0.145481	14.5481	2	1.94591	0.0633371	0	0	0	0	0.4395	1	0.090261	0.693147	2.19722	C27	医药制造业	山东省	370000	淄博市	370300
756	2021	0.268012	26.8012	4	1.79176	0.0636183	11.2	1.38629	20	0	0.4358	1	0.076624	1.38629	2.77259	C27	医药制造业	山东省	370000	淄博市	370300
756	2022	0.188295	18.8295	1	1.38629	0.0573623	12.12	0.693147	10	0	0.4172	1	0.191381	1.79176	2.3979	C27	医药制造业	山东省	370000	淄博市	370300
756	2023	0.148175	14.8175	3	0	0.0597305	11.95	0	0	0	0.4014	1	0.097984	0.693147	2.99573	C27	医药制造业	山东省	370000	淄博市	370300
757	2013	0.007449	1.22037	1	0	0.0127365	0	0	0	0.48	0.1555	0	1.08846	0	0	C34	通用设备制造业	四川省	510000	内江市	511000
757	2014	0.0752116	7.52116	1	0	0.0074321	0	0	0	0.54	0.088	1	3.40824	0	0	C34	通用设备制造业	四川省	510000	内江市	511000
757	2015	0.0847107	8.47108	1	0	0.0073846	7.25	0	0	0.58	0.1974	1	0.033485	0	0	C34	通用设备制造业	四川省	510000	内江市	511000
757	2016	0.0880025	8.80025	1	0	0.0065127	7.85	0	0	0.4283	0.2757	1	0.048156	0	0	C34	通用设备制造业	四川省	510000	内江市	511000
757	2017	0.0952495	9.52495	1	0.693147	0.0056413	8.64	0	0	0.43	0.2545	1	0.082209	0	0	C34	通用设备制造业	四川省	510000	内江市	511000
757	2018	0.0917315	9.17315	1	0	0.0048366	10.75	0	0	0.54	0.3162	1	0.129985	0	0	C34	通用设备制造业	四川省	510000	内江市	511000
766	2011	0.0255677	2.55678	1	0	0.186598	0	0	0	0	0.1293	0	0.018865	0	1.38629	C27	医药制造业	吉林省	220000	通化市	220500
766	2012	0.0209458	2.09458	1	0	0.177547	0	0	0	0.22	0.1189	0	0.020544	0.693147	0	C27	医药制造业	吉林省	220000	通化市	220500
766	2013	0.0245558	2.45558	1	0	0.170778	0	0	0	0	0.1017	0	-0.007301	0.693147	0.693147	C27	医药制造业	吉林省	220000	通化市	220500
766	2014	0.0228758	2.28758	1	0	0.142773	0	0	0	0	0.0994	0	0.07221	0.693147	0.693147	C27	医药制造业	吉林省	220000	通化市	220500
766	2015	0.0997291	9.97291	1	0	0.062926	10.8	0	0	0	0.1735	1	2.4062	0.693147	0.693147	C27	医药制造业	吉林省	220000	通化市	220500
766	2016	0.113397	11.3397	1	0.693147	0.0566352	12.14	0	0	0	0.1536	1	0.852517	1.09861	1.09861	C27	医药制造业	吉林省	220000	通化市	220500
766	2017	0.10431	10.431	1	0	0.0496058	11.96	0	0	0	0.1397	1	0.061779	1.38629	0.693147	C27	医药制造业	吉林省	220000	通化市	220500
766	2018	0.0400583	4.00583	1	0	0.0508451	14.51	0	0	0	0.1308	0	0.074509	1.94591	0.693147	C27	医药制造业	吉林省	220000	通化市	220500
766	2019	0.112915	11.2915	1	1.09861	0.0574056	15.5	0	0	0	0.1653	1	-0.438475	1.09861	0	C27	医药制造业	吉林省	220000	通化市	220500
766	2020	0.118614	11.8614	1	0.693147	0.0502427	16.98	0	0	0	0.1448	1	-0.135282	1.38629	1.09861	C27	医药制造业	吉林省	220000	通化市	220500
766	2021	0.10321	10.321	1	0	0.0502929	18.66	0	0	0	0.1747	1	0.014743	1.09861	0	C27	医药制造业	吉林省	220000	通化市	220500
766	2022	0.108508	10.8508	1	0	0.0462335	18.75	0	0	0	0.1637	1	0.012478	1.79176	0	C27	医药制造业	吉林省	220000	通化市	220500
766	2023	0.0407451	4.07451	1	0	0.0446238	21	0	0	0	0.1629	0	-0.021268	1.94591	0	C27	医药制造业	吉林省	220000	通化市	220500
768	2011	0.0272991	2.72991	2	0	0.0125048	0	0	0	1.99	0.0933	0	0.013046	1.09861	0	C37	铁路、船舶、航空航天和其它运输设备制造业	陕西省	610000	西安市	610100
768	2012	0.0895379	8.95379	1	0	0.0147526	0	0	0	2.97	0.1362	1	-0.0148	1.09861	0	C37	铁路、船舶、航空航天和其它运输设备制造业	陕西省	610000	西安市	610100
768	2013	0.0901901	9.01901	1	0	0.0155357	0	0	0	3.2435	0.1437	1	0.011028	1.09861	0	C37	铁路、船舶、航空航天和其它运输设备制造业	陕西省	610000	西安市	610100
768	2014	0.0935489	9.35489	1	0	0.0150067	0	0	0	3.92	0.148	1	0.047323	1.38629	0	C37	铁路、船舶、航空航天和其它运输设备制造业	陕西省	610000	西安市	610100
768	2015	0.0988308	9.88308	1	0	0.0151218	7.27	0	0	4.36	0.1352	1	0.311529	1.38629	0	C37	铁路、船舶、航空航天和其它运输设备制造业	陕西省	610000	西安市	610100
768	2016	0.113481	11.3481	2	0	0.0143018	8.17	0	0	6.786	0.1355	1	0.044931	1.38629	0	C37	铁路、船舶、航空航天和其它运输设备制造业	陕西省	610000	西安市	610100
768	2017	0.115563	11.5563	2	0	0.0096284	8.63	0	0	7.52	0.1172	1	-0.003086	1.60944	0	C37	铁路、船舶、航空航天和其它运输设备制造业	陕西省	610000	西安市	610100
768	2018	0.109595	10.9595	2	0	0.0089952	7.41	0	0	5.2762	0.1021	1	0.094323	1.38629	0	C37	铁路、船舶、航空航天和其它运输设备制造业	陕西省	610000	西安市	610100
768	2019	0.105259	10.5259	2	0	0.0061078	6.61	0	0	4.81	0.0867	1	-0.140361	1.09861	0	C37	铁路、船舶、航空航天和其它运输设备制造业	陕西省	610000	西安市	610100
768	2020	0.0505883	5.05883	2	0.693147	0.0329262	6.23	0	0	5.31	0.1422	0	-0.124925	0.693147	1.09861	C37	铁路、船舶、航空航天和其它运输设备制造业	陕西省	610000	西安市	610100
768	2021	0.0448982	4.48982	2	0	0.0262608	6.64	0	0	5.99	0.1199	0	0.028474	0.693147	1.38629	C37	铁路、船舶、航空航天和其它运输设备制造业	陕西省	610000	西安市	610100
768	2022	0.114043	11.4043	2	0	0.0220766	6.83	1.38629	3.57143	6.54	0.101	0	0.024936	0.693147	4.44265	C37	铁路、船舶、航空航天和其它运输设备制造业	陕西省	610000	西安市	610100
768	2023	0.116677	11.6677	3	0	0.0216154	7.18	1.09861	1.63934	7.41	0.1013	0	0.211356	0.693147	4.81218	C37	铁路、船舶、航空航天和其它运输设备制造业	陕西省	610000	西安市	610100
777	2011	0.0233151	2.3315	1	0	0.0483634	0	0	0	0.71	0.178	0	0.034814	0	1.79176	C34	通用设备制造业	江苏省	320000	苏州市	320500
777	2012	0.0157044	1.57044	1	0	0.0454699	0	0	0	0.92	0.1562	0	0.055764	0.693147	0	C34	通用设备制造业	江苏省	320000	苏州市	320500
777	2013	0.0302297	3.02297	1	0	0.0430561	0	0	0	1.1254	0.237	0	0.035676	1.09861	1.09861	C34	通用设备制造业	江苏省	320000	苏州市	320500
777	2014	0.0240774	2.40774	1	0	0.0424641	0	0	0	1.23	0.2393	0	0.046955	0.693147	0.693147	C34	通用设备制造业	江苏省	320000	苏州市	320500
777	2015	0.0407918	4.07918	1	0.693147	0.0398135	10.16	0	0	1.26	0.2147	0	0.058176	0.693147	1.09861	C34	通用设备制造业	江苏省	320000	苏州市	320500
777	2016	0.117383	11.7383	1	0.693147	0.0279578	12.13	0	0	2.6743	0.1543	1	0.096793	0.693147	1.94591	C34	通用设备制造业	江苏省	320000	苏州市	320500
777	2017	0.120112	12.0112	1	0	0.0252144	12.2	0	0	3.99	0.1331	1	-0.001346	1.38629	2.48491	C34	通用设备制造业	江苏省	320000	苏州市	320500
777	2018	0.125999	12.5998	1	0	0.0232151	11.81	0	0	4.26	0.1143	1	0.054618	1.79176	2.94444	C34	通用设备制造业	江苏省	320000	苏州市	320500
777	2019	0.140155	14.0155	2	0	0.0210635	11.46	0	0	4.02	0.099	1	0.085016	1.79176	3.52636	C34	通用设备制造业	江苏省	320000	苏州市	320500
777	2020	0.151475	15.1475	3	0	0.0199154	11.97	0	0	4.5	0.0895	1	0.048682	1.79176	3.46574	C34	通用设备制造业	江苏省	320000	苏州市	320500
777	2021	0.159125	15.9125	2	1.38629	0.0170708	11.7	0	0	5.39	0.0718	1	0.077851	2.07944	3.66356	C34	通用设备制造业	江苏省	320000	苏州市	320500
777	2022	0.0679744	6.79744	2	0	0.0161826	12.99	0	0	5.97	0.0721	0	0.078802	1.09861	3.85015	C34	通用设备制造业	江苏省	320000	苏州市	320500
777	2023	0.0638834	6.38834	2	0	0.0177148	13.03	0	0	5.97	0.0652	0	0.11423	1.09861	3.29584	C34	通用设备制造业	江苏省	320000	苏州市	320500
782	2011	0.0292802	2.92802	1	0	0.0115458	0	0	0	0	0.3756	0	0.118144	0	1.94591	C26	化学原料及化学制品制造业	广东省	440000	江门市	440700
782	2012	0.104722	10.4722	1	0	0.0126427	0	0	0	0.36	0.3981	1	0.012413	0.693147	1.60944	C28	化学纤维制造业	广东省	440000	江门市	440700
782	2013	0.0343402	3.43402	1	0	0.020099	0	0	0	0.354	0.3318	0	-0.004607	0.693147	1.94591	C28	化学纤维制造业	广东省	440000	江门市	440700
782	2014	0.0244227	2.44227	1	0	0.020353	0	0	0	0.6109	0.2979	0	0.177322	0.693147	0.693147	C28	化学纤维制造业	广东省	440000	江门市	440700
782	2015	0.0426926	4.26926	1	0	0.0221601	16.64	0	0	0.61	0.4378	0	0.017783	0	1.60944	C28	化学纤维制造业	广东省	440000	江门市	440700
782	2016	0.0373643	3.73643	1	0	0.0168576	13.6	0	0	0.8	0.3761	0	-0.070205	0.693147	0.693147	C28	化学纤维制造业	广东省	440000	江门市	440700
782	2017	0.120148	12.0148	1	0	0.0158743	15.3	0	0	0.84	0.3413	1	0.021899	1.09861	1.94591	C28	化学纤维制造业	广东省	440000	江门市	440700
782	2018	0.11284	11.284	1	0	0.0162657	25.5	0	0	0.66	0.2861	1	0.011554	0.693147	0.693147	C28	化学纤维制造业	广东省	440000	江门市	440700
782	2019	0.120392	12.0392	1	0	0.0172193	24.96	0	0	0.64	0.2992	1	-0.011176	0	2.56495	C28	化学纤维制造业	广东省	440000	江门市	440700
782	2020	0.1154	11.5399	1	0	0.0154841	26.2	0	0	0.86	0.2604	1	-0.015389	0.693147	1.09861	C28	化学纤维制造业	广东省	440000	江门市	440700
782	2021	0.131088	13.1088	2	0	0.0134869	27	0	0	0.81	0.2092	1	0.031463	0.693147	1.94591	C28	化学纤维制造业	广东省	440000	江门市	440700
782	2022	0.138258	13.8258	2	0	0.0136535	27.1	0	0	0.83	0.1894	1	-0.044432	1.09861	2.56495	C28	化学纤维制造业	广东省	440000	江门市	440700
782	2023	0.0644316	6.44316	2	0	0.0661658	25.78	0	0	0.93	0.1921	0	-0.1125	1.09861	1.79176	C28	化学纤维制造业	广东省	440000	江门市	440700
788	2011	0.0882197	8.82197	1	0	0.0501354	0	0	0	0	0.1376	1	0.070448	1.09861	0	C27	医药制造业	重庆市	500000	重庆市	500000
788	2012	0.078277	7.8277	1	0	0.0377853	0	0	0	1.13	0.1075	1	0.058063	0	0	C27	医药制造业	重庆市	500000	重庆市	500000
788	2013	0.0923816	9.23816	1	0	0.0362788	0	0	0	1.2011	0.3411	1	0.070276	0	0.693147	C27	医药制造业	重庆市	500000	重庆市	500000
788	2014	0.0908367	9.08367	1	0	0.052212	0	0	0	1.72	0.389	1	-0.037822	0	0	C27	医药制造业	重庆市	500000	重庆市	500000
788	2015	0.100273	10.0273	1	0	0.0013904	20.37	0	0	4.57	0.0459	1	-0.002558	0	1.09861	C27	医药制造业	重庆市	500000	重庆市	500000
788	2016	0.0970822	9.70822	1	0	0.001319	18.76	0	0	4.12	0.0808	1	0.007021	0	0.693147	C27	医药制造业	重庆市	500000	重庆市	500000
788	2017	0.104355	10.4355	1	0	0.0011998	19.56	0	0	4.16	0.0753	1	0.028918	1.38629	0	C27	医药制造业	重庆市	500000	重庆市	500000
788	2018	0.0999531	9.99531	1	0	0.0014534	11.93	0	0	5.34	0.0694	1	0.032026	1.38629	0	C27	医药制造业	重庆市	500000	重庆市	500000
788	2019	0.104035	10.4034	1	0	0.0035857	13.56	0	0	5.83	0.0629	1	0.031098	1.09861	0.693147	C27	医药制造业	重庆市	500000	重庆市	500000
788	2020	0.100495	10.0495	1	0	0.0132415	14.61	0	0	5.97	0.0607	1	0.036215	1.09861	0	C27	医药制造业	重庆市	500000	重庆市	500000
788	2021	0.041171	4.1171	1	0.693147	0.0262535	13.28	0	0	5.49	0.0493	0	0.03341	1.09861	0.693147	C27	医药制造业	重庆市	500000	重庆市	500000
788	2022	0.0290664	2.90664	1	0	0.0387278	13.21	0	0	5.05	0.0548	0	0.031535	1.09861	0	C27	医药制造业	重庆市	500000	重庆市	500000
788	2023	0.0291593	2.91593	1	0	0.0470361	13.05	0	0	5.05	0.0481	0	0.032209	1.09861	0	C27	医药制造业	重庆市	500000	重庆市	500000
790	2015	0.117726	11.7726	1	1.09861	0.043462	15.48	0	0	3.14	0.3293	1	-0.07742	0	0.693147	C27	医药制造业	四川省	510000	成都市	510100
790	2016	0.110145	11.0145	1	1.09861	0.0295619	16.73	0	0	2.7883	0.2688	1	0.14142	0	0	C27	医药制造业	四川省	510000	成都市	510100
790	2017	0.106524	10.6524	1	1.09861	0.0146437	17.22	0	0	3.09	0.1804	1	0.259843	0	0	C27	医药制造业	四川省	510000	成都市	510100
790	2018	0.107129	10.7129	1	1.09861	0.0174382	18.66	0	0	2.8491	0.1724	1	-0.003949	0	0	C27	医药制造业	四川省	510000	成都市	510100
790	2019	0.111414	11.1414	1	1.09861	0.0159732	18.62	0	0	2.15	0.1545	1	0.054048	0.693147	0	C27	医药制造业	四川省	510000	成都市	510100
790	2020	0.0366957	3.66957	1	0	0.0153464	22.77	0	0	3.54	0.1502	0	0.036042	1.09861	0	C27	医药制造业	四川省	510000	成都市	510100
790	2021	0.0608956	6.08956	1	0.693147	0.0579101	21.17	0	0	3.09	0.1214	0	0.07363	1.09861	2.3979	C27	医药制造业	四川省	510000	成都市	510100
790	2022	0.0481516	4.81517	1	0	0.0590766	15.35	0	0	2.56	0.1906	0	0.019397	1.38629	1.60944	C27	医药制造业	四川省	510000	成都市	510100
790	2023	0.0464404	4.64404	1	0	0.0699267	15.63	0	0	2.56	0.1665	0	0.070508	1.38629	1.38629	C27	医药制造业	四川省	510000	成都市	510100
791	2011	0.0567723	5.67723	4	0	0.131544	0	0	0	0	0.2428	0	-0.033453	0.693147	0	C26	化学原料及化学制品制造业	甘肃省	620000	兰州市	620100
792	2011	0.0981246	9.81246	2	0	0.0263912	0	0	0	0	0.2247	1	0.231175	0.693147	0	C26	化学原料及化学制品制造业	青海省	630000	格尔木市	632801
792	2012	0.0977444	9.77444	2	0	0.0189034	0	0	0	0.51	0.2111	1	0.186117	0.693147	0	C26	化学原料及化学制品制造业	青海省	630000	格尔木市	632801
792	2013	0.105803	10.5803	2	0	0.0142147	0	0	0	0.4482	0.2263	1	0.017915	0.693147	1.09861	C26	化学原料及化学制品制造业	青海省	630000	格尔木市	632801
792	2014	0.113245	11.3245	2	0	0.0108639	0	0	0	0.58	0.2758	1	0.07078	0	2.70805	C26	化学原料及化学制品制造业	青海省	630000	格尔木市	632801
792	2015	0.11488	11.488	1	0	0.0092336	5.6	0	0	0.59	0.3412	1	0.269846	0.693147	2.77259	C26	化学原料及化学制品制造业	青海省	630000	格尔木市	632801
792	2016	0.162822	16.2822	2	0	0.0097846	0.0575	0.693147	5.88235	0.2568	0.4414	1	0.077161	1.09861	2.89037	C26	化学原料及化学制品制造业	青海省	630000	格尔木市	632801
792	2017	0.231893	23.1893	4	1.38629	0.0145648	5.78	1.09861	5.88235	0.63	0.6387	1	-0.156811	1.38629	3.55535	C26	化学原料及化学制品制造业	青海省	630000	格尔木市	632801
792	2018	0.209152	20.9152	4	1.79176	0.0130071	15.92	0	0	0.61	0.6913	1	-0.155086	2.30259	3.58352	C26	化学原料及化学制品制造业	青海省	630000	格尔木市	632801
792	2021	0.286606	28.6606	2	2.48491	0.0399831	27.04	2.70805	8.9172	0.99	0.304	1	1.21249	1.09861	5.06259	C26	化学原料及化学制品制造业	青海省	630000	格尔木市	632801
792	2022	0.26318	26.318	2	1.94591	0.0239906	16.99	2.3979	11.6279	1.09	0.1838	1	1.44417	1.38629	4.46591	C26	化学原料及化学制品制造业	青海省	630000	格尔木市	632801
792	2023	0.20182	20.182	5	1.79176	0.0197479	18.88	1.94591	7.89474	1.55	0.1825	0	0.216497	1.09861	4.3438	C26	化学原料及化学制品制造业	青海省	630000	格尔木市	632801
800	2011	0.0556203	5.56203	3	0	0.0365276	0	0	0	6.71	0.2053	0	-0.044009	1.79176	0	C36	汽车制造业	吉林省	220000	长春市	220100
800	2012	0.0656624	6.56624	4	0	0.0620794	0	0	0	7.32	0.2071	0	-0.097876	1.38629	0	C36	汽车制造业	吉林省	220000	长春市	220100
800	2013	0.116504	11.6504	3	0	0.0517419	0	0	0	8.3708	0.276	1	0.121095	0	0	C36	汽车制造业	吉林省	220000	长春市	220100
800	2014	0.106276	10.6276	2	0	0.0578616	0	0	0	8.71	0.284	1	-0.00025	0	0	C36	汽车制造业	吉林省	220000	长春市	220100
800	2015	0.12624	12.624	2	0.693147	0.0575005	8.24	0	0	8.52	0.3038	1	0.005479	0.693147	0	C36	汽车制造业	吉林省	220000	长春市	220100
800	2016	0.0563235	5.63234	2	1.09861	0.0432313	8.02	0	0	7.8061	0.2538	0	-0.122539	0.693147	0	C36	汽车制造业	吉林省	220000	长春市	220100
800	2017	0.0705101	7.05101	3	1.38629	0.0348675	9.73	0	0	7.83	0.2279	0	0.032224	0.693147	0	C36	汽车制造业	吉林省	220000	长春市	220100
800	2018	0.0830911	8.30911	3	2.48491	0.0349028	11.63	0	0	7.05	0.2309	0	0.017584	0.693147	0	C36	汽车制造业	吉林省	220000	长春市	220100
800	2019	0.154478	15.4477	3	3.04452	0.0383485	12.31	1.09861	1.44928	7.88	0.225	0	-0.002311	0	4.93447	C36	汽车制造业	吉林省	220000	长春市	220100
800	2020	0.114083	11.4083	3	0.693147	0.0431007	8.94	0.693147	1.23457	6.04	0.124	0	-0.138445	1.09861	4.40672	C36	汽车制造业	吉林省	220000	长春市	220100
800	2021	0.0771877	7.71877	3	1.94591	0.0397368	11.7	0	0	7.11	0.1324	0	0.068473	1.09861	0	C36	汽车制造业	吉林省	220000	长春市	220100
800	2022	0.0898835	8.98835	3	2.70805	0.0448999	14.27	0	0	7.8	0.1693	0	-0.096136	1.09861	0	C36	汽车制造业	吉林省	220000	长春市	220100
800	2023	0.0979553	9.79553	3	3.09104	0.037017	15.75	0	0	8.4	0.1728	0	0.032352	1.38629	0	C36	汽车制造业	吉林省	220000	长春市	220100
801	2011	0.152656	15.2656	1	1.09861	0.0055305	0	2.3979	16.3934	1.82	0.1045	0	0.063202	0	4.12713	C39	计算机、通信和其他电子设备制造业	四川省	510000	绵阳市	510700
801	2012	0.111771	11.1771	1	0.693147	0.0037285	0	1.60944	6.15385	1.84	0.077	0	0.611989	1.09861	4.18966	C39	计算机、通信和其他电子设备制造业	四川省	510000	绵阳市	510700
801	2013	0.115005	11.5005	1	1.38629	0.0048062	0	1.60944	3.7037	2.8356	0.0709	0	0.048196	0.693147	4.69135	C39	计算机、通信和其他电子设备制造业	四川省	510000	绵阳市	510700
801	2014	0.124671	12.4671	1	2.99573	0.0054901	0	1.38629	5.17241	2.51	0.071	0	0.053042	0.693147	4.07754	C39	计算机、通信和其他电子设备制造业	四川省	510000	绵阳市	510700
801	2015	0.125977	12.5977	1	4.00733	0.0156457	19.53	0.693147	1.49254	4.22	0.0854	0	0.262361	0.693147	4.21951	C39	计算机、通信和其他电子设备制造业	四川省	510000	绵阳市	510700
801	2016	0.130035	13.0035	1	3.93183	0.0096963	20.64	0.693147	1.17647	4.48	0.0778	0	0.04078	1.09861	4.45435	C39	计算机、通信和其他电子设备制造业	四川省	510000	绵阳市	510700
801	2017	0.180733	18.0733	1	4.20469	0.0081929	21.42	1.94591	8.33333	4.74	0.0747	0	-0.009038	0.693147	4.29046	C39	计算机、通信和其他电子设备制造业	四川省	510000	绵阳市	510700
801	2018	0.107076	10.7076	1	4.46591	0.0065615	20.86	0	0	4.53	0.0637	0	0.027704	0.693147	4.12713	C39	计算机、通信和其他电子设备制造业	四川省	510000	绵阳市	510700
801	2019	0.145661	14.5661	1	3.43399	0.0055007	20.92	1.38629	4.41176	4.3	0.06	0	0.002355	0.693147	4.23411	C39	计算机、通信和其他电子设备制造业	四川省	510000	绵阳市	510700
801	2020	0.143905	14.3905	1	3.13549	0.00508	20.91	1.38629	3.44828	6.17	0.0544	0	0.084768	0.693147	4.47734	C39	计算机、通信和其他电子设备制造业	四川省	510000	绵阳市	510700
801	2021	0.145752	14.5752	2	1.09861	0.0055177	18.23	1.60944	4.34783	6.16	0.0552	0	0.050948	1.38629	4.5326	C39	计算机、通信和其他电子设备制造业	四川省	510000	绵阳市	510700
801	2022	0.195903	19.5903	2	2.19722	0.0046693	17.56	2.48491	10	6.22	0.0511	0	0.060956	1.38629	4.70953	C39	计算机、通信和其他电子设备制造业	四川省	510000	绵阳市	510700
801	2023	0.106873	10.6873	1	2.07944	0.0039198	15.5	0.693147	1.96078	5.7	0.0548	0	0.039393	1.38629	3.95124	C39	计算机、通信和其他电子设备制造业	四川省	510000	绵阳市	510700
803	2018	0.0288468	2.88468	1	1.79176	0.0459772	5.98	0	0	0	0.0594	0	0.148829	0	0	C38	电气机械及器材制造业	四川省	510000	南充市	511300
810	2014	0.130704	13.0704	2	3.3673	0.0109036	0	0	0	4.5889	0.0092	1	0.225356	0.693147	0	C39	计算机、通信和其他电子设备制造业	四川省	510000	遂宁市	510900
810	2015	0.147062	14.7062	1	3.93183	0.0287187	37.06	0	0	4.13	0.0099	1	0.168555	0	0	C39	计算机、通信和其他电子设备制造业	四川省	510000	遂宁市	510900
810	2016	0.137503	13.7503	1	4.06044	0.0257452	20.5	0	0	2.1277	0.0989	1	-0.027479	0	0	C39	计算机、通信和其他电子设备制造业	四川省	510000	遂宁市	510900
810	2017	0.146698	14.6698	1	4.40672	0.0234288	20.37	0	0	2.16	0.0916	1	0.015006	0.693147	0	C39	计算机、通信和其他电子设备制造业	四川省	510000	遂宁市	510900
810	2018	0.151704	15.1704	1	4.85981	0.0211116	21.2	0	0	2.17	0.081	1	0.1343	0.693147	0	C39	计算机、通信和其他电子设备制造业	四川省	510000	遂宁市	510900
810	2019	0.149137	14.9137	1	4.40672	0.0167916	20.97	0	0	1.82	0.0742	1	0.170942	1.09861	0	C39	计算机、通信和其他电子设备制造业	四川省	510000	遂宁市	510900
810	2020	0.15552	15.5519	1	5.03695	0.0160439	19.95	0	0	2.07	0.0745	1	0.102048	1.09861	0	C39	计算机、通信和其他电子设备制造业	四川省	510000	遂宁市	510900
810	2021	0.170336	17.0336	3	4.38203	0.0226716	19.09	0	0	2.04	0.0666	1	0.058197	1.09861	0	C39	计算机、通信和其他电子设备制造业	四川省	510000	遂宁市	510900
810	2022	0.181318	18.1319	3	4.64439	0.0262006	27.64	0	0	3.67	0.063	1	0.319262	1.09861	0	C39	计算机、通信和其他电子设备制造业	四川省	510000	遂宁市	510900
810	2023	0.182617	18.2617	3	4.63473	0.027567	29.17	0	0	4.16	0.0545	1	0.059055	1.09861	0	C39	计算机、通信和其他电子设备制造业	四川省	510000	遂宁市	510900
811	2011	0.0144123	1.44123	1	0	0.0249385	0	0	0	2.28	0.138	0	0.493801	0	0.693147	C34	通用设备制造业	山东省	370000	烟台市	370600
811	2012	0.0206712	2.06712	1	0	0.0234855	0	0	0	2.3	0.149	0	0.155056	0.693147	0.693147	C34	通用设备制造业	山东省	370000	烟台市	370600
811	2013	0.0285226	2.85226	1	0	0.0190746	0	0	0	2.6151	0.1196	0	0.210681	0.693147	1.94591	C34	通用设备制造业	山东省	370000	烟台市	370600
811	2014	0.0527922	5.27921	2	0.693147	0.0445154	0	0	0	2.8716	0.102	0	0.113311	1.09861	2.07944	C34	通用设备制造业	山东省	370000	烟台市	370600
811	2015	0.0635499	6.35499	2	0	0.0586325	19.54	0	0	3.7	0.1375	0	0.109859	1.60944	1.60944	C34	通用设备制造业	山东省	370000	烟台市	370600
811	2016	0.0563227	5.63227	2	0	0.0451088	19.56	0	0	3.9706	0.1305	0	0.152657	1.60944	0.693147	C34	通用设备制造业	山东省	370000	烟台市	370600
811	2017	0.0656485	6.56485	3	0	0.0390766	20.09	0	0	4.26	0.1239	0	0.177161	1.94591	0	C34	通用设备制造业	山东省	370000	烟台市	370600
811	2018	0.0681201	6.81201	3	0	0.0380735	21.15	0	0	5.08	0.1161	0	0.040613	2.07944	0	C34	通用设备制造业	山东省	370000	烟台市	370600
811	2019	0.160094	16.0094	3	0.693147	0.0277047	22.42	0.693147	25	4.77	0.1005	0	0.33977	1.94591	1.60944	C34	通用设备制造业	山东省	370000	烟台市	370600
811	2020	0.0748672	7.48672	3	0	0.0215797	23.66	0	0	5.42	0.1146	0	0.127566	1.38629	1.60944	C34	通用设备制造业	山东省	370000	烟台市	370600
811	2021	0.0584619	5.84619	1	0	0.0181571	24.76	0	0	5.53	0.1099	0	0.106696	1.38629	2.3979	C34	通用设备制造业	山东省	370000	烟台市	370600
811	2022	0.0715617	7.15617	1	1.94591	0.0204255	21.67	0	0	4.8	0.113	0	0.066197	1.60944	1.38629	C34	通用设备制造业	山东省	370000	烟台市	370600
811	2023	0.0703889	7.03889	2	1.09861	0.0191668	21.27	0	0	5.1	0.102	0	0.084777	1.09861	1.60944	C34	通用设备制造业	山东省	370000	烟台市	370600
813	2017	0.120052	12.0052	1	0	0.0121376	16.38	0	0	7.82	0.0874	1	0.211606	1.38629	1.79176	C27	医药制造业	新疆维吾尔自治区	650000	乌鲁木齐市	650100
813	2018	0.095474	9.5474	1	0	0.0094842	15	0	0	8.56	0.0937	1	0.161938	0	0	C27	医药制造业	新疆维吾尔自治区	650000	乌鲁木齐市	650100
813	2019	0.0945036	9.45036	1	0	0.0084755	14.09	0	0	8.33	0.094	1	0.062512	0	0	C27	医药制造业	新疆维吾尔自治区	650000	乌鲁木齐市	650100
813	2020	0.115713	11.5713	1	0	0.0307608	19.43	0	0	10.34	0.0816	1	0.060844	1.09861	0.693147	C27	医药制造业	新疆维吾尔自治区	650000	乌鲁木齐市	650100
813	2021	0.12562	12.562	1	1.09861	0.0493254	18.73	0	0	9.97	0.0889	1	-0.081149	1.38629	0	C27	医药制造业	新疆维吾尔自治区	650000	乌鲁木齐市	650100
813	2022	0.0496779	4.96779	1	1.09861	0.0378686	18.67	0	0	0	0.1094	0	-0.033999	2.07944	0	C27	医药制造业	新疆维吾尔自治区	650000	乌鲁木齐市	650100
813	2023	0.0415419	4.15419	1	0.693147	0.0344466	20.36	0	0	0	0.1386	0	-0.008047	1.38629	0	C27	医药制造业	新疆维吾尔自治区	650000	乌鲁木齐市	650100
816	2011	0.0525729	5.25729	1	0	0.280203	0	0	0	0	0.1189	0	0.787429	1.09861	3.17805	C34	通用设备制造业	江苏省	320000	盐城市	320900
816	2012	0.0607859	6.07859	1	0	0.351355	0	0	0	0.35	0.1286	0	-0.308404	2.07944	2.48491	C34	通用设备制造业	江苏省	320000	盐城市	320900
816	2013	0.0618229	6.18229	1	0.693147	0.329849	0	0	0	0.5645	0.1137	0	0.03101	1.94591	1.94591	C34	通用设备制造业	江苏省	320000	盐城市	320900
816	2014	0.101178	10.1178	1	3.46574	0.241381	0	0	0	0.64	0.1601	0	0.768071	2.19722	3.3673	C34	通用设备制造业	江苏省	320000	盐城市	320900
816	2015	0.111697	11.1697	1	5.03695	0.243387	5.92	0	0	0.54	0.1826	0	0.012158	1.79176	2.19722	C34	通用设备制造业	江苏省	320000	盐城市	320900
816	2016	0.107832	10.7832	1	5.03695	0.250894	9.53	0	0	0.9559	0.1963	0	-0.010295	0.693147	2.3979	C34	通用设备制造业	江苏省	320000	盐城市	320900
816	2017	0.112997	11.2997	1	5.03695	0.259208	8.35	0	0	1.19	0.1979	0	-0.081111	1.38629	2.30259	C34	通用设备制造业	江苏省	320000	盐城市	320900
816	2020	0.0865769	8.65769	1	5.03695	0.203181	8.65	0	0	0.57	0.1852	0	0.032349	0.693147	0	C34	通用设备制造业	江苏省	320000	盐城市	320900
816	2021	0.0929842	9.29842	1	5.03695	0.186824	3.45	0	0	0.95	0.1856	0	0.038753	1.94591	0	C34	通用设备制造业	江苏省	320000	盐城市	320900
816	2022	0.0858558	8.58558	1	5.03695	0.21185	4.5	0	0	1.03	0.2175	0	0.002315	0.693147	0	C34	通用设备制造业	江苏省	320000	盐城市	320900
816	2023	0.0942751	9.42751	1	4.95583	0.206155	5.15	0	0	1.03	0.2127	0	-0.014073	1.79176	0	C34	通用设备制造业	江苏省	320000	盐城市	320900
818	2012	0.112194	11.2194	1	0	0.193824	0	0	0	0.12	0.4739	1	0.026896	1.38629	0	C26	化学原料及化学制品制造业	辽宁省	210000	葫芦岛市	211400
818	2013	0.113035	11.3035	1	0	0.185799	0	0	0	0.129	0.4584	1	-0.044075	1.60944	0	C26	化学原料及化学制品制造业	辽宁省	210000	葫芦岛市	211400
818	2014	0.119537	11.9537	1	0	0.187341	0	0	0	0.1345	0.5485	1	0.045163	1.94591	0	C26	化学原料及化学制品制造业	辽宁省	210000	葫芦岛市	211400
818	2015	0.120768	12.0768	1	0	0.188974	5.47	0	0	0.19	0.5478	1	0.061048	1.60944	0	C26	化学原料及化学制品制造业	辽宁省	210000	葫芦岛市	211400
818	2016	0.130907	13.0907	1	0	0.205457	6.41	0	0	0.18	0.5269	1	0.075374	1.79176	1.09861	C26	化学原料及化学制品制造业	辽宁省	210000	葫芦岛市	211400
818	2017	0.122998	12.2998	1	0.693147	0.143169	6.08	0	0	0.25	0.3639	1	0.123309	2.07944	0	C26	化学原料及化学制品制造业	辽宁省	210000	葫芦岛市	211400
818	2018	0.181478	18.1478	1	0	0.125498	6.07	0.693147	14.2857	0.52	0.3135	1	-0.05387	2.3979	2.07944	C26	化学原料及化学制品制造业	辽宁省	210000	葫芦岛市	211400
818	2019	0.138598	13.8598	2	1.09861	0.115596	11.97	0	0	0.71	0.2795	1	0.117555	2.07944	0	C26	化学原料及化学制品制造业	辽宁省	210000	葫芦岛市	211400
818	2020	0.279263	27.9263	3	2.63906	0.12659	14.1	1.09861	28.5714	2.12	0.2495	1	0.145915	2.19722	2.07944	C26	化学原料及化学制品制造业	辽宁省	210000	葫芦岛市	211400
818	2021	0.211356	21.1356	1	2.07944	0.111436	20.14	0.693147	14.2857	2.22	0.2291	1	0.173205	2.30259	2.07944	C26	化学原料及化学制品制造业	辽宁省	210000	葫芦岛市	211400
818	2022	0.231203	23.1203	1	0	0.10886	19.15	1.09861	28.5714	2.02	0.2243	1	0.036479	2.3979	2.07944	C26	化学原料及化学制品制造业	辽宁省	210000	葫芦岛市	211400
818	2023	0.0945765	9.45765	2	3.17805	0.103202	22.38	0	0	1.98	0.1967	0	0.069121	1.94591	0	C26	化学原料及化学制品制造业	辽宁省	210000	葫芦岛市	211400
821	2011	0.101881	10.1881	1	0	0.0170086	0	0	0	0	0.2815	1	0.014336	0	2.70805	C35	专用设备制造业	湖北省	420000	荆门市	420800
821	2012	0.110905	11.0905	1	0	0.0175558	0	0	0	1.63	0.3014	1	-0.093797	0.693147	2.77259	C35	专用设备制造业	湖北省	420000	荆门市	420800
821	2013	0.115817	11.5817	1	0	0.0339536	0	0	0	1.5859	0.3051	1	0.084203	1.09861	2.83321	C35	专用设备制造业	湖北省	420000	荆门市	420800
821	2014	0.150952	15.0952	1	0.693147	0.0318268	0	0.693147	4.16667	1.71	0.2853	1	0.016406	0.693147	3.21888	C35	专用设备制造业	湖北省	420000	荆门市	420800
821	2015	0.343321	34.3321	1	0.693147	0.0268198	13.51	0.693147	100	1.53	0.2003	1	0.513078	0	0.693147	C35	专用设备制造业	湖北省	420000	荆门市	420800
821	2016	0.147393	14.7393	1	3.04452	0.0232575	15.26	0	0	2.2807	0.1778	1	0.04897	0	3.04452	C35	专用设备制造业	湖北省	420000	荆门市	420800
821	2017	0.157105	15.7105	1	3.63759	0.0242849	16.03	0	0	2.42	0.1186	1	0.023093	0.693147	2.89037	C35	专用设备制造业	湖北省	420000	荆门市	420800
821	2018	0.153899	15.39	1	3.58352	0.0215572	19.7	0	0	1.99	0.0772	1	0.50314	0	3.29584	C35	专用设备制造业	湖北省	420000	荆门市	420800
821	2019	0.144933	14.4933	1	2.19722	0.020039	19.27	0	0	2.46	0.0805	1	-0.19586	0.693147	3.29584	C35	专用设备制造业	湖北省	420000	荆门市	420800
821	2020	0.1565	15.65	1	2.30259	0.020396	25.03	0	0	2.74	0.0615	1	0.02314	1.38629	3.4012	C35	专用设备制造业	湖北省	420000	荆门市	420800
821	2021	0.135795	13.5795	1	1.94591	0.0250624	16.01	0	0	2.78	0.0445	1	0.267373	0.693147	2.83321	C35	专用设备制造业	湖北省	420000	荆门市	420800
821	2022	0.146166	14.6166	1	2.07944	0.0196902	22.8	0	0	2.2	0.0365	1	0.12504	1.09861	3.09104	C35	专用设备制造业	湖北省	420000	荆门市	420800
821	2023	0.0824592	8.24592	2	2.07944	0.0108622	23.54	0	0	2.22	0.0684	0	0.120245	0.693147	2.77259	C35	专用设备制造业	湖北省	420000	荆门市	420800
822	2011	0.276223	27.6223	1	0	0.0273885	0	0.693147	100	0	0.6239	0	0.107355	0.693147	0.693147	C26	化学原料及化学制品制造业	山东省	370000	潍坊市	370700
822	2012	0.142542	14.2543	1	0	0.024665	0	0.693147	33.3333	0	0.6242	0	-0.161689	1.60944	1.38629	C26	化学原料及化学制品制造业	山东省	370000	潍坊市	370700
822	2013	0.283812	28.3812	1	0	0.025418	0	0.693147	100	0	0.5491	0	-0.373042	1.94591	0.693147	C26	化学原料及化学制品制造业	山东省	370000	潍坊市	370700
822	2015	0.0256263	2.56263	1	0	0.0241579	0	0	0	0	0.466	0	0.056997	0.693147	0	C26	化学原料及化学制品制造业	山东省	370000	潍坊市	370700
822	2016	0.0345924	3.45924	1	0	0.0227332	0	0	0	0	0.4585	0	-0.054322	1.79176	0	C26	化学原料及化学制品制造业	山东省	370000	潍坊市	370700
822	2017	0.0389186	3.89186	1	0	0.0196789	0	0	0	0	0.4054	0	0.30787	2.56495	0	C26	化学原料及化学制品制造业	山东省	370000	潍坊市	370700
822	2018	0.0541759	5.41759	2	0	0.0186105	0	0	0	0	0.4503	0	0.193623	2.83321	0	C26	化学原料及化学制品制造业	山东省	370000	潍坊市	370700
822	2019	0.0464162	4.64162	1	0	0.0183792	0.95	0	0	0	0.4728	0	-0.003722	2.48491	0.693147	C26	化学原料及化学制品制造业	山东省	370000	潍坊市	370700
822	2020	0.0595785	5.95785	1	0.693147	0.0205518	1.05	0	0	0	0.4853	0	-0.095494	2.48491	1.38629	C26	化学原料及化学制品制造业	山东省	370000	潍坊市	370700
822	2021	0.0503465	5.03465	2	0	0.0161935	1.19	0	0	0	0.3765	0	0.16783	2.63906	0	C26	化学原料及化学制品制造业	山东省	370000	潍坊市	370700
822	2022	0.115151	11.5151	2	0	0.0165489	6.2	0.693147	12.5	0	0.3473	0	0.047791	2.56495	2.19722	C26	化学原料及化学制品制造业	山东省	370000	潍坊市	370700
822	2023	0.110799	11.0799	2	0.693147	0.0130128	9.28	0.693147	5	0	0.2942	0	0.250651	2.3979	3.04452	C26	化学原料及化学制品制造业	山东省	370000	潍坊市	370700
823	2011	0.0502006	5.02006	1	1.79176	0.018611	0	0	0	1.62	0.4054	0	0.070957	1.38629	0	C39	计算机、通信和其他电子设备制造业	广东省	440000	汕头市	440500
823	2012	0.0394945	3.94945	1	1.09861	0.0170969	0	0	0	1.56	0.3787	0	0.06362	0	1.38629	C39	计算机、通信和其他电子设备制造业	广东省	440000	汕头市	440500
823	2013	0.0271281	2.71281	1	1.09861	0.0148197	0	0	0	1.4469	0.3212	0	0.02143	0	0	C39	计算机、通信和其他电子设备制造业	广东省	440000	汕头市	440500
823	2014	0.0609347	6.09347	1	2.3979	0.0125056	0	0	0	1.52	0.3451	0	0.392604	0	2.63906	C39	计算机、通信和其他电子设备制造业	广东省	440000	汕头市	440500
823	2015	0.194771	19.4771	1	2.30259	0.0125018	9	0.693147	14.2857	1.92	0.3631	1	0.007568	1.09861	2.07944	C39	计算机、通信和其他电子设备制造业	广东省	440000	汕头市	440500
823	2016	0.151871	15.1871	1	2.99573	0.011873	11.28	0	0	1.94	0.3354	1	0.053369	1.94591	1.09861	C39	计算机、通信和其他电子设备制造业	广东省	440000	汕头市	440500
823	2017	0.269129	26.9129	1	3.09104	0.0158001	11.39	1.38629	33.3333	1.82	0.3181	1	0.048451	1.38629	2.30259	C39	计算机、通信和其他电子设备制造业	广东省	440000	汕头市	440500
823	2018	0.288005	28.8005	1	2.77259	0.014399	14.03	1.60944	40	1.79	0.2885	1	0.061929	1.38629	2.3979	C39	计算机、通信和其他电子设备制造业	广东省	440000	汕头市	440500
823	2019	0.295424	29.5424	1	3.13549	0.0192452	14.39	1.09861	50	1.78	0.3209	1	0.065247	1.38629	1.60944	C39	计算机、通信和其他电子设备制造业	广东省	440000	汕头市	440500
823	2020	0.280116	28.0116	1	3.3673	0.0155862	14.33	0.693147	50	1.79	0.2619	1	0.088692	1.38629	1.09861	C39	计算机、通信和其他电子设备制造业	广东省	440000	汕头市	440500
823	2021	0.114705	11.4705	3	3.7612	0.0127411	14.24	0	0	1.91	0.219	0	0.091703	1.60944	2.19722	C39	计算机、通信和其他电子设备制造业	广东省	440000	汕头市	440500
823	2022	0.183143	18.3144	3	3.49651	0.0129584	12.69	1.09861	16.6667	1.88	0.2238	0	0.075598	1.79176	2.56495	C39	计算机、通信和其他电子设备制造业	广东省	440000	汕头市	440500
823	2023	0.19401	19.401	3	3.61092	0.0130141	15	1.09861	20	1.85	0.3586	0	0.022154	1.38629	2.3979	C39	计算机、通信和其他电子设备制造业	广东省	440000	汕头市	440500
830	2011	0.0315625	3.15625	1	0	0.0366629	0	0	0	0.41	0.5863	0	0.971722	0.693147	0	C26	化学原料及化学制品制造业	山东省	370000	聊城市	371500
830	2012	0.292535	29.2535	1	0.693147	0.0297586	0	0.693147	100	0.62	0.5876	0	0.038511	1.79176	0.693147	C26	化学原料及化学制品制造业	山东省	370000	聊城市	371500
830	2013	0.139526	13.9526	2	1.09861	0.0457835	0	0.693147	16.6667	0.8842	0.627	0	0.054151	2.07944	1.94591	C26	化学原料及化学制品制造业	山东省	370000	聊城市	371500
830	2014	0.050365	5.0365	1	0.693147	0.0421814	0	0	0	1.01	0.6977	0	0.064841	1.38629	0	C26	化学原料及化学制品制造业	山东省	370000	聊城市	371500
830	2015	0.15028	15.028	2	1.09861	0.0428831	2.03	1.09861	16.6667	1.03	0.667	0	0.332673	1.09861	2.56495	C26	化学原料及化学制品制造业	山东省	370000	聊城市	371500
830	2016	0.176212	17.6212	3	0.693147	0.0446201	8.99	1.09861	22.2222	0.97	0.6108	0	0.08518	1.79176	2.30259	C26	化学原料及化学制品制造业	山东省	370000	聊城市	371500
830	2017	0.238744	23.8744	3	0	0.0504387	9.61	1.94591	40	1	0.6434	0	0.214149	1.94591	2.77259	C26	化学原料及化学制品制造业	山东省	370000	聊城市	371500
830	2018	0.246992	24.6992	2	0.693147	0.0524679	10.06	1.60944	50	0.83	0.7334	0	0.047002	1.94591	2.19722	C26	化学原料及化学制品制造业	山东省	370000	聊城市	371500
830	2019	0.315088	31.5088	2	0.693147	0.0479411	10.33	1.94591	42.8571	0.91	0.701	1	0.02999	2.07944	2.70805	C26	化学原料及化学制品制造业	山东省	370000	聊城市	371500
830	2020	0.34437	34.437	2	0.693147	0.060286	11.67	2.07944	53.8462	1.06	0.675	1	0.255516	2.19722	2.63906	C26	化学原料及化学制品制造业	山东省	370000	聊城市	371500
830	2021	0.158385	15.8385	2	1.09861	0.0619352	12.86	0	0	1.23	0.6552	1	0.256092	2.30259	0.693147	C26	化学原料及化学制品制造业	山东省	370000	聊城市	371500
830	2022	0.154659	15.4659	2	1.09861	0.0674779	11.65	0	0	1.37	0.6233	1	-0.034024	2.63906	0	C26	化学原料及化学制品制造业	山东省	370000	聊城市	371500
830	2023	0.324956	32.4956	2	0	0.0658174	11.89	1.09861	100	1.37	0.5674	0	-0.02479	2.19722	1.09861	C26	化学原料及化学制品制造业	山东省	370000	聊城市	371500
836	2011	0.0375558	3.75558	2	1.09861	0.0382927	0	0	0	2.97	0.2216	0	-0.004164	0	0	C39	计算机、通信和其他电子设备制造业	天津市	120000	天津市	120000
836	2012	0.023764	2.37641	2	0	0.0380197	0	0	0	2.04	0.2027	0	0.043168	0	0	C38	电气机械及器材制造业	天津市	120000	天津市	120000
836	2013	0.0261443	2.61443	1	1.09861	0.0348839	0	0	0	2.1903	0.2456	0	0.044758	0	0	C38	电气机械及器材制造业	天津市	120000	天津市	120000
836	2014	0.0139473	1.39473	1	0	0.0340007	0	0	0	2.01	0.2466	0	-0.178321	0	0	C38	电气机械及器材制造业	天津市	120000	天津市	120000
836	2015	0.0436478	4.36478	1	1.60944	0.0251333	15	0	0	2.11	0.1383	0	1.17307	0.693147	0	C38	电气机械及器材制造业	天津市	120000	天津市	120000
836	2016	0.131295	13.1295	1	3.17805	0.0349929	19.44	0	0	2.9703	0.1673	1	0.034945	0	0	C38	电气机械及器材制造业	天津市	120000	天津市	120000
836	2017	0.168297	16.8297	3	3.33221	0.0311787	19.66	0	0	4.06	0.1621	1	0.063108	1.38629	0	C38	电气机械及器材制造业	天津市	120000	天津市	120000
836	2018	0.161368	16.1368	4	2.30259	0.0323198	14.97	0	0	2.39	0.1802	1	-0.174114	1.09861	0	C38	电气机械及器材制造业	天津市	120000	天津市	120000
836	2019	0.0842344	8.42344	4	0.693147	0.0321715	22.82	0	0	2.8	0.2411	0	-0.230288	1.38629	0	C38	电气机械及器材制造业	天津市	120000	天津市	120000
836	2020	0.0890493	8.90493	3	1.60944	0.0306872	18.54	0	0	2.59	0.2848	0	0.009438	1.38629	1.09861	C38	电气机械及器材制造业	天津市	120000	天津市	120000
836	2021	0.0821847	8.21847	3	1.60944	0.0290817	18.13	0	0	2.89	0.3098	0	0.044128	1.38629	0	C38	电气机械及器材制造业	天津市	120000	天津市	120000
836	2022	0.0585965	5.85965	3	0	0.0268706	12.18	0	0	2.75	0.273	0	-0.024654	1.38629	0	C38	电气机械及器材制造业	天津市	120000	天津市	120000
836	2023	0.077858	7.7858	3	1.38629	0.0291689	10.95	0	0	2.75	0.277	0	-0.179995	1.94591	0	C38	电气机械及器材制造业	天津市	120000	天津市	120000
837	2011	0.0958737	9.58737	1	0	0.0208883	0	0	0	0	0.2607	1	0.102992	0	1.94591	C34	通用设备制造业	陕西省	610000	宝鸡市	610300
837	2012	0.098864	9.8864	1	0	0.0201573	0	0	0	1.51	0.2941	1	-0.015532	0	1.94591	C34	通用设备制造业	陕西省	610000	宝鸡市	610300
837	2013	0.100748	10.0748	1	0	0.0177899	0	0	0	1.5	0.2641	1	-0.023421	0	2.3979	C34	通用设备制造业	陕西省	610000	宝鸡市	610300
837	2014	0.0951724	9.51724	1	0	0.0491121	0	0	0	1.57	0.3095	1	0.189308	0	1.09861	C34	通用设备制造业	陕西省	610000	宝鸡市	610300
837	2015	0.107201	10.7201	1	0	0.0457633	10.1	0	0	0.97	0.2986	1	-0.025503	0	1.94591	C34	通用设备制造业	陕西省	610000	宝鸡市	610300
837	2016	0.0967579	9.67579	1	0	0.0413849	10.5	0	0	1.14	0.2533	1	0.01307	0	0.693147	C34	通用设备制造业	陕西省	610000	宝鸡市	610300
837	2017	0.119933	11.9933	1	0	0.035668	10.6	0	0	1.29	0.2249	1	0.025666	1.60944	2.19722	C34	通用设备制造业	陕西省	610000	宝鸡市	610300
837	2018	0.147741	14.7741	2	1.60944	0.033738	10.5	0	0	1.22	0.2273	1	-0.081746	1.60944	2.07944	C34	通用设备制造业	陕西省	610000	宝鸡市	610300
837	2019	0.149689	14.9689	2	2.30259	0.0368946	10.17	0	0	1.19	0.2496	1	-0.113684	1.09861	1.79176	C34	通用设备制造业	陕西省	610000	宝鸡市	610300
837	2021	0.134801	13.4801	1	1.38629	0.0474439	10.36	0	0	1.54	0.3171	1	0.34176	0.693147	2.63906	C34	通用设备制造业	陕西省	610000	宝鸡市	610300
837	2022	0.13354	13.354	1	1.60944	0.0537212	11.08	0	0	1.75	0.2932	1	0.064266	1.09861	1.60944	C34	通用设备制造业	陕西省	610000	宝鸡市	610300
837	2023	0.0433254	4.33254	1	0.693147	0.045022	12.58	0	0	2.17	0.2984	0	0.308444	0	1.38629	C34	通用设备制造业	陕西省	610000	宝鸡市	610300
852	2011	0.0416398	4.16398	1	0.693147	0.0323133	0	0	0	0	0.3862	0	0.037556	0	2.3979	C35	专用设备制造业	湖北省	420000	武汉市	420100
852	2012	0.0854548	8.54548	1	0.693147	0.0267362	0	0.693147	9.09091	3.79	0.3694	0	0.039749	0	2.48491	C35	专用设备制造业	湖北省	420000	武汉市	420100
852	2013	0.041955	4.1955	1	0	0.0229705	0	0	0	4.299	0.3269	0	0.015145	0	3.21888	C35	专用设备制造业	湖北省	420000	武汉市	420100
852	2014	0.0706943	7.06943	1	0	0.0184073	0	0.693147	4.34783	4.66	0.3124	0	0.001414	0	3.17805	C35	专用设备制造业	湖北省	420000	武汉市	420100
852	2015	0.0639162	6.39162	1	1.09861	0.0125724	13.43	0	0	4.13	0.1894	0	0.073688	0.693147	3.29584	C35	专用设备制造业	湖北省	420000	武汉市	420100
852	2016	0.0500678	5.00678	1	1.09861	0.0155008	11.11	0	0	4.319	0.1999	0	-0.314009	0	2.30259	C35	专用设备制造业	湖北省	420000	武汉市	420100
852	2017	0.0678316	6.78315	1	1.38629	0.0141073	13.85	0	0	4.58	0.1869	0	0.034047	1.94591	1.79176	C35	专用设备制造业	湖北省	420000	武汉市	420100
852	2018	0.0643342	6.43342	2	1.60944	0.0125774	15.34	0	0	5.58	0.1646	0	0.010897	0.693147	0.693147	C35	专用设备制造业	湖北省	420000	武汉市	420100
852	2019	0.0425919	4.25919	2	0	0.0112166	16.29	0	0	6.17	0.1503	0	0.015878	0.693147	0	C35	专用设备制造业	湖北省	420000	武汉市	420100
852	2020	0.137994	13.7994	2	0.693147	0.0110456	17.79	0	0	7.83	0.151	1	0.006955	1.79176	0.693147	C35	专用设备制造业	湖北省	420000	武汉市	420100
852	2021	0.131683	13.1683	2	1.09861	0.0125169	19.5	0	0	8.4	0.1908	1	0.022471	0.693147	0	C35	专用设备制造业	湖北省	420000	武汉市	420100
852	2022	0.156271	15.6271	3	1.38629	0.0086282	21.8	0	0	9.07	0.1554	1	0.521203	1.79176	0	C35	专用设备制造业	湖北省	420000	武汉市	420100
852	2023	0.115515	11.5515	6	1.09861	0.00897	22.8	0	0	9.07	0.1397	0	0.030952	1.09861	0.693147	C35	专用设备制造业	湖北省	420000	武汉市	420100
856	2012	0.0106306	1.22037	1	0	0.0970488	0	0	0	0	0.1292	0	0.102397	0	0	C35	专用设备制造业	河北省	130000	唐山市	130200
856	2013	0.0324436	3.24436	1	0	0.0850284	0	0	0	0	0.106	0	0.143771	0	3.29584	C35	专用设备制造业	河北省	130000	唐山市	130200
856	2014	0.0125694	1.25694	1	0	0.0712874	0	0	0	0	0.0907	0	-0.08867	0	0.693147	C35	专用设备制造业	河北省	130000	唐山市	130200
856	2015	0.0496053	4.96053	1	0.693147	0.0756265	2.33	0	0	0.78	0.0934	0	-0.441121	1.38629	2.77259	C35	专用设备制造业	河北省	130000	唐山市	130200
856	2017	0.026844	2.6844	1	0	0.0504205	5.21	0	0	1.65	0.1652	0	0.040585	1.38629	0	C35	专用设备制造业	河北省	130000	唐山市	130200
856	2018	0.0444982	4.44982	1	0	0.0434584	5.92	0	0	2.44	0.1393	0	0.201357	1.38629	2.48491	C35	专用设备制造业	河北省	130000	唐山市	130200
856	2019	0.0809077	8.09077	1	0	0.041541	6.44	0.693147	14.2857	2.16	0.1365	0	0.03108	0	2.07944	C35	专用设备制造业	河北省	130000	唐山市	130200
856	2020	0.0395269	3.95269	2	0	0.0381273	6.18	0	0	2	0.1671	0	-0.023908	0	1.79176	C35	专用设备制造业	河北省	130000	唐山市	130200
856	2021	0.0366114	3.66114	1	0.693147	0.008528	5.06	0	0	2.39	0.1146	0	-0.197204	0	2.48491	C35	专用设备制造业	河北省	130000	唐山市	130200
856	2022	0.112184	11.2184	1	0.693147	0.0073136	9.5	1.09861	13.3333	2.92	0.1049	0	0.027327	1.09861	2.77259	C35	专用设备制造业	河北省	130000	唐山市	130200
856	2023	0.117819	11.7819	1	0.693147	0.0072911	10.78	0	0	2.72	0.107	1	0.059116	1.09861	2.07944	C35	专用设备制造业	河北省	130000	唐山市	130200
862	2011	0.0509238	5.09238	1	1.60944	0.0227386	0	0	0	0	0.379	0	0.274455	1.09861	1.09861	C34	通用设备制造业	宁夏回族自治区	640000	银川市	640100
862	2012	0.0355307	3.55307	1	0	0.0154306	0	0	0	1.5	0.5995	0	-0.245371	1.09861	0	C34	通用设备制造业	宁夏回族自治区	640000	银川市	640100
862	2013	0.119534	11.9534	1	0	0.0152141	0	1.09861	12.5	1.4337	0.7265	0	-0.31601	1.09861	2.83321	C34	通用设备制造业	宁夏回族自治区	640000	银川市	640100
862	2014	0.0908611	9.0861	1	0	0.0087909	0	0.693147	4.54545	1.34	0.7819	0	0.332648	0.693147	3.13549	C34	通用设备制造业	宁夏回族自治区	640000	银川市	640100
868	2011	0.161897	16.1897	1	0	0.0489282	0	1.09861	10.5263	1.24	0.1335	1	0.686403	0.693147	2.99573	C36	汽车制造业	安徽省	340000	合肥市	340100
868	2012	0.148659	14.8659	1	0	0.0419402	0	1.09861	5.55556	1.25	0.1233	1	0.039908	0	3.61092	C36	汽车制造业	安徽省	340000	合肥市	340100
868	2013	0.189553	18.9553	1	0	0.0457961	0	1.94591	7.89474	1.0513	0.1318	1	-0.085728	0.693147	4.3438	C36	汽车制造业	安徽省	340000	合肥市	340100
868	2014	0.142997	14.2997	1	0.693147	0.0508727	0	2.3979	6.57895	1.8194	0.1401	0	0.129235	0.693147	5.03044	C36	汽车制造业	安徽省	340000	合肥市	340100
868	2015	0.135671	13.5671	1	0	0.0445522	9.31	2.3979	4.62963	1.71	0.1823	0	0.006997	0	5.3799	C36	汽车制造业	安徽省	340000	合肥市	340100
868	2016	0.14371	14.371	1	0	0.0297297	10.06	2.70805	3.04348	1.54	0.1251	0	0.023949	0	6.1334	C36	汽车制造业	安徽省	340000	合肥市	340100
868	2017	0.148293	14.8293	1	0	0.0305609	10.8	2.48491	2.48307	1.69	0.1238	0	-0.225154	1.38629	6.09582	C36	汽车制造业	安徽省	340000	合肥市	340100
868	2018	0.160359	16.0359	2	0	0.0330068	12.44	2.3979	3.21543	2.16	0.135	0	-0.601651	1.60944	5.743	C36	汽车制造业	安徽省	340000	合肥市	340100
868	2021	0.124797	12.4797	2	1.09861	0.0472676	12.23	1.38629	1.96078	2.37	0.1878	0	-0.459083	0	5.03695	C36	汽车制造业	安徽省	340000	合肥市	340100
868	2022	0.185567	18.5567	2	2.07944	0.0516977	12.55	2.30259	9.89011	2.17	0.1988	0	-0.764593	1.09861	4.52179	C36	汽车制造业	安徽省	340000	合肥市	340100
868	2023	0.151859	15.1859	2	1.79176	0.0514386	13.87	1.79176	6.84931	2.58	0.1967	0	10.536	0	4.30406	C36	汽车制造业	安徽省	340000	合肥市	340100
880	2011	0.140883	14.0883	1	0	0.0477766	0	0.693147	8.33333	1.16	0.2497	1	0.216804	0	2.56495	C34	通用设备制造业	山东省	370000	潍坊市	370700
880	2012	0.0860587	8.60587	1	0	0.046797	0	0.693147	16.6667	3.5	0.231	0	0.056191	0	1.94591	C34	通用设备制造业	山东省	370000	潍坊市	370700
880	2013	0.117311	11.7311	1	0	0.0596798	0	0	0	3.9784	0.4201	1	0.022173	0.693147	2.30259	C34	通用设备制造业	山东省	370000	潍坊市	370700
880	2014	0.131297	13.1297	2	0	0.0493245	0	0	0	4.25	0.3755	1	0.043053	1.09861	2.48491	C34	通用设备制造业	山东省	370000	潍坊市	370700
880	2015	0.0658897	6.58897	2	0	0.0505003	10.91	0	0	4.29	0.4005	0	0.025165	1.09861	1.94591	C34	通用设备制造业	山东省	370000	潍坊市	370700
880	2016	0.0592128	5.92128	1	0	0.0504174	11.7	0	0	4.3952	0.4015	0	0.017144	0	3.80666	C34	通用设备制造业	山东省	370000	潍坊市	370700
880	2017	0.133327	13.3327	2	0	0.0426702	13.37	0	0	4.89	0.3362	1	0.017776	0	2.89037	C34	通用设备制造业	山东省	370000	潍坊市	370700
880	2018	0.0982988	9.82988	2	0	0.041345	13.43	0.693147	2.5641	0	0.2895	0	0.027921	1.38629	3.68888	C34	通用设备制造业	山东省	370000	潍坊市	370700
880	2019	0.0843493	8.43493	2	0	0.0383886	11.5	0.693147	1.92308	0	0.2594	0	0.063037	0	3.97029	C34	通用设备制造业	山东省	370000	潍坊市	370700
880	2020	0.184555	18.4555	1	0	0.0484836	11.83	1.38629	3.37079	0	0.2479	1	0.073336	1.60944	4.49981	C34	通用设备制造业	山东省	370000	潍坊市	370700
880	2021	0.183414	18.3414	2	0	0.0374327	14.43	1.09861	1.85185	0	0.2088	1	0.07977	1.38629	4.69135	C34	通用设备制造业	山东省	370000	潍坊市	370700
880	2022	0.228348	22.8348	3	2.30259	0.0332827	14.25	1.38629	6.66667	0	0.1752	1	0.078528	1.09861	3.82864	C34	通用设备制造业	山东省	370000	潍坊市	370700
880	2023	0.155214	15.5214	3	2.30259	0.0278633	16.6	1.09861	7.40741	0	0.15	0	0.064971	1.94591	3.33221	C34	通用设备制造业	山东省	370000	潍坊市	370700
881	2018	0.107196	10.7196	2	0	0.0290566	9.15	0	0	0	0.1953	1	0.084974	1.09861	0	C26	化学原料及化学制品制造业	辽宁省	210000	大连市	210200
881	2019	0.113445	11.3445	2	0	0.0347976	10.46	0	0	0	0.2113	1	0.018744	1.60944	0	C26	化学原料及化学制品制造业	辽宁省	210000	大连市	210200
881	2020	0.136506	13.6506	3	1.38629	0.0332223	16	0	0	0	0.2252	1	0.041105	0.693147	0	C26	化学原料及化学制品制造业	辽宁省	210000	大连市	210200
881	2021	0.128276	12.8276	2	0.693147	0.0744598	12.16	0	0	0	0.206	1	0.040379	2.07944	0	C26	化学原料及化学制品制造业	辽宁省	210000	大连市	210200
881	2022	0.12251	12.251	2	1.09861	0.0832452	13.75	0	0	0	0.2049	1	0.01001	0.693147	0	C26	化学原料及化学制品制造业	辽宁省	210000	大连市	210200
881	2023	0.0688059	6.88059	3	1.09861	0.0858518	16.31	0	0	0	0.2088	0	-0.105647	1.09861	0	C26	化学原料及化学制品制造业	辽宁省	210000	大连市	210200
893	2020	0.117445	11.7445	1	0	0.638148	0	0	0	2.99	0.1818	1	0.018223	0	0	C26	化学原料及化学制品制造业	广东省	440000	广州市	440100
893	2021	0.12885	12.885	2	0	0.493187	0	0	0	1.6	0.2849	1	0.227371	0.693147	0	C26	化学原料及化学制品制造业	广东省	440000	广州市	440100
893	2022	0.120073	12.0073	2	0.693147	0.510517	0	0	0	1.38	0	1	1.36785	0	0	C26	化学原料及化学制品制造业	广东省	440000	广州市	440100
893	2023	0.0371606	3.71606	2	0	0.424598	0.2	0	0	1.38	0	0	0.086903	0	0	C26	化学原料及化学制品制造业	广东省	440000	广州市	440100
901	2011	0.129563	12.9563	2	1.38629	0.046195	0	0	0	0	0.1348	1	0.076885	0.693147	2.63906	C40	仪器仪表制造业	黑龙江省	230000	哈尔滨市	230100
901	2012	0.156261	15.6261	2	2.77259	0.0500002	0	0	0	11.55	0.117	1	-0.074457	0.693147	2.48491	C37	铁路、船舶、航空航天和其它运输设备制造业	黑龙江省	230000	哈尔滨市	230100
901	2013	0.157316	15.7316	2	3.04452	0.0480632	0	0	0	12.6403	0.0972	1	0.078133	0	2.99573	C37	铁路、船舶、航空航天和其它运输设备制造业	黑龙江省	230000	哈尔滨市	230100
901	2014	0.22895	22.895	2	3.55535	0.0391079	0	1.09861	18.1818	11.8577	0.088	1	0.612611	0	2.48491	C37	铁路、船舶、航空航天和其它运输设备制造业	黑龙江省	230000	哈尔滨市	230100
901	2015	0.213328	21.3328	2	3.66356	0.0498571	25	0.693147	7.14286	10.18	0.1052	1	0.048747	0	2.70805	C37	铁路、船舶、航空航天和其它运输设备制造业	黑龙江省	230000	哈尔滨市	230100
901	2016	0.200474	20.0474	1	3.21888	0.0570407	17.99	0.693147	9.09091	8.44	0.139	1	0.371091	0.693147	2.48491	C37	铁路、船舶、航空航天和其它运输设备制造业	黑龙江省	230000	哈尔滨市	230100
901	2017	0.18075	18.075	2	2.99573	0.0549401	17.04	1.60944	10	13.26	0.1465	0	0.071302	0.693147	3.71357	C37	铁路、船舶、航空航天和其它运输设备制造业	黑龙江省	230000	哈尔滨市	230100
901	2018	0.180947	18.0947	2	2.77259	0.0548601	15.26	0	0	18.25	0.1526	1	0.047951	0.693147	3.09104	C37	铁路、船舶、航空航天和其它运输设备制造业	黑龙江省	230000	哈尔滨市	230100
901	2019	0.230519	23.0519	1	3.68888	0.0492936	15.46	0.693147	14.2857	18.01	0.1868	1	0.032472	1.38629	2.07944	C37	铁路、船舶、航空航天和其它运输设备制造业	黑龙江省	230000	哈尔滨市	230100
901	2020	0.261881	26.1881	2	3.95124	0.0283532	15.48	1.09861	13.3333	18.15	0.1948	1	0.045703	1.79176	2.77259	C36	汽车制造业	黑龙江省	230000	哈尔滨市	230100
901	2021	0.238461	23.8461	2	4.35671	0.0239755	15.59	0.693147	5.26316	21.23	0.1474	1	-0.021683	1.60944	2.99573	C36	汽车制造业	黑龙江省	230000	哈尔滨市	230100
901	2022	0.217569	21.7569	2	4.36945	0.0247645	18.9	0	0	21.03	0.1587	1	0.011567	2.56495	2.94444	C36	汽车制造业	黑龙江省	230000	哈尔滨市	230100
901	2023	0.211967	21.1967	3	4.29046	0.0273902	20.45	1.38629	15.7895	20.73	0.1748	0	-0.020388	0	2.99573	C36	汽车制造业	黑龙江省	230000	哈尔滨市	230100
902	2014	0.0495312	4.95312	1	0.693147	0.0565236	0	0	0	0.81	0.3722	0	0.267933	1.09861	1.94591	C26	化学原料及化学制品制造业	湖北省	420000	荆门市	420800
902	2015	0.2345	23.45	4	2.83321	0.0515684	5.3	1.38629	37.5	0.42	0.2827	0	0.713354	1.60944	2.19722	C26	化学原料及化学制品制造业	湖北省	420000	荆门市	420800
902	2016	0.207646	20.7646	2	1.60944	0.0613172	5.46	1.09861	11.7647	0.65	0.3254	1	0.067528	1.09861	2.89037	C26	化学原料及化学制品制造业	湖北省	420000	荆门市	420800
902	2017	0.237227	23.7227	3	0.693147	0.0588057	6.09	1.38629	17.6471	0.81	0.3107	1	0.09312	1.94591	2.89037	C26	化学原料及化学制品制造业	湖北省	420000	荆门市	420800
902	2018	0.255333	25.5333	4	0.693147	0.0568478	6.02	1.38629	21.4286	0.77	0.3117	1	0.092386	1.94591	2.70805	C26	化学原料及化学制品制造业	湖北省	420000	荆门市	420800
902	2019	0.170483	17.0483	4	0.693147	0.0617462	5	0	0	1	0.2899	1	0.050099	2.30259	2.70805	C26	化学原料及化学制品制造业	湖北省	420000	荆门市	420800
902	2020	0.224132	22.4132	4	0.693147	0.0661893	5.77	1.09861	10.5263	1.42	0.2569	1	0.063831	1.94591	2.99573	C26	化学原料及化学制品制造业	湖北省	420000	荆门市	420800
902	2021	0.258555	25.8555	2	1.94591	0.0656647	5.08	1.38629	27.2727	1.8	0.3421	1	0.145256	1.79176	2.48491	C26	化学原料及化学制品制造业	湖北省	420000	荆门市	420800
902	2022	0.25449	25.449	3	1.09861	0.0804543	6.98	0.693147	33.3333	1.65	0.391	1	0.086466	2.30259	1.38629	C26	化学原料及化学制品制造业	湖北省	420000	荆门市	420800
902	2023	0.1328	13.28	2	1.09861	0.079492	8.44	0.693147	11.1111	1.61	0.4072	0	0.110734	2.3979	2.30259	C26	化学原料及化学制品制造业	湖北省	420000	荆门市	420800
903	2011	0.0934169	9.34169	1	0	0.0752203	0	0	0	0.62	0.2156	1	-0.028029	1.09861	0	C34	通用设备制造业	云南省	530000	昆明市	530100
903	2012	0.127288	12.7288	1	0	0.0586786	0	0	0	0.65	0.341	1	0.021341	2.77259	2.19722	C34	通用设备制造业	云南省	530000	昆明市	530100
903	2013	0.127633	12.7633	1	0.693147	0.0553998	0	0	0	1.0281	0.3428	1	0.043808	2.56495	1.38629	C34	通用设备制造业	云南省	530000	昆明市	530100
903	2014	0.161828	16.1828	1	0	0.0687392	0	0.693147	3.125	1.17	0.2882	1	0.286613	2.70805	3.49651	C34	通用设备制造业	云南省	530000	昆明市	530100
903	2015	0.172867	17.2867	1	0	0.0675128	8.25	0.693147	3.7037	1.85	0.2775	1	0.036704	3.2581	3.33221	C34	通用设备制造业	云南省	530000	昆明市	530100
903	2016	0.182894	18.2894	4	0.693147	0.0574032	8.65	0	0	1.94	0.2252	1	0.220437	2.83321	3.68888	C34	通用设备制造业	云南省	530000	昆明市	530100
903	2017	0.138758	13.8758	2	0	0.0621301	10.47	0	0	3.03	0.2487	1	0.215023	2.19722	1.94591	C34	通用设备制造业	云南省	530000	昆明市	530100
903	2018	0.177753	17.7753	3	1.09861	0.0572098	11.91	0	0	1.82	0.2095	1	0.021931	2.89037	3.63759	C34	通用设备制造业	云南省	530000	昆明市	530100
903	2019	0.201741	20.1741	2	1.38629	0.0566792	12.25	0.693147	8.33333	3.22	0.2153	1	0.003229	2.83321	2.56495	C34	通用设备制造业	云南省	530000	昆明市	530100
903	2020	0.192205	19.2205	3	2.19722	0.0748268	11.57	0	0	2.69	0.2171	1	-0.003661	3.2581	3.2581	C34	通用设备制造业	云南省	530000	昆明市	530100
903	2021	0.22996	22.996	2	1.60944	0.0793634	12.07	1.09861	13.3333	2.69	0.2203	1	-0.000648	2.94444	2.77259	C34	通用设备制造业	云南省	530000	昆明市	530100
903	2022	0.105437	10.5437	2	1.60944	0.110571	13.1	0	0	2.69	0.2417	0	-0.242921	3.09104	3.09104	C34	通用设备制造业	云南省	530000	昆明市	530100
903	2023	0.137789	13.7789	2	1.60944	0.132604	12.08	0.693147	7.14286	2.69	0.2475	0	-0.292258	2.94444	2.70805	C34	通用设备制造业	云南省	530000	昆明市	530100
908	2014	0.0176804	1.76804	1	0	0.0154576	0	0	0	1.67	0.1402	0	0.282496	1.09861	0	C34	通用设备制造业	湖南省	430000	岳阳市	430600
908	2015	0.0827721	8.27721	1	0	0.018431	7.39	0	0	1.76	0.0944	1	1.26193	0	0	C27	医药制造业	湖南省	430000	岳阳市	430600
908	2016	0.0945021	9.45021	1	0	0.0172857	13.25	0	0	3.53	0.0859	1	0.165158	0.693147	0	C27	医药制造业	湖南省	430000	岳阳市	430600
908	2017	0.110932	11.0932	1	0	0.0181036	14.39	0	0	2.44	0.1445	1	-0.006651	2.3979	0	C27	医药制造业	湖南省	430000	岳阳市	430600
908	2018	0.126455	12.6455	2	0	0.0212622	16.75	0	0	4.34	0.1493	1	0.094289	2.3979	0	C27	医药制造业	湖南省	430000	岳阳市	430600
908	2019	0.12776	12.776	2	0	0.0300143	18.07	0	0	4.12	0.2211	1	-0.326657	2.07944	0	C27	医药制造业	湖南省	430000	岳阳市	430600
908	2020	0.146382	14.6382	3	0	0.0355565	19.5	0	0	4.23	0.3452	1	-0.681397	2.19722	0	C27	医药制造业	湖南省	430000	岳阳市	430600
908	2021	0.115247	11.5247	1	0	0.0566334	18.39	0	0	2.25	0.3495	1	-0.492041	1.38629	0	C27	医药制造业	湖南省	430000	岳阳市	430600
908	2022	0.12806	12.806	1	0	0.0698629	26.36	0	0	3.1	0.3111	1	-0.348944	1.60944	0.693147	C27	医药制造业	湖南省	430000	岳阳市	430600
909	2011	0.0188357	1.88357	1	1.38629	0.0040783	0	0	0	2.59	0.0129	0	0.104338	0	0	C39	计算机、通信和其他电子设备制造业	浙江省	330000	杭州市	330100
912	2011	0.0373883	3.73883	1	0	0.0208549	0	0	0	0	0.2716	0	0.033222	2.07944	1.09861	C26	化学原料及化学制品制造业	四川省	510000	成都市	510100
912	2012	0.175179	17.5179	3	0	0.0141833	0	0.693147	50	0.84	0.1919	0	-0.078809	0.693147	1.09861	C26	化学原料及化学制品制造业	四川省	510000	成都市	510100
912	2013	0.0457662	4.57662	2	0	0.0202717	0	0	0	0.9149	0.38	0	-0.106824	0.693147	1.60944	C26	化学原料及化学制品制造业	四川省	510000	成都市	510100
912	2014	0.0464215	4.64215	2	0	0.0210047	0	0	0	0.94	0.3625	0	-0.565918	1.60944	0.693147	C26	化学原料及化学制品制造业	四川省	510000	成都市	510100
912	2016	0.136228	13.6228	2	0	0.0300985	1.55	0.693147	25	0.49	0.7496	0	-0.845166	0.693147	1.60944	C26	化学原料及化学制品制造业	四川省	510000	成都市	510100
912	2019	0.105543	10.5543	3	1.79176	0.0219678	17.56	0	0	0.66	0.6381	0	0.064651	2.19722	0.693147	C26	化学原料及化学制品制造业	四川省	510000	成都市	510100
912	2020	0.0840692	8.40692	3	0.693147	0.0182325	16.27	0	0	0.77	0.5249	0	0.073677	2.30259	0	C26	化学原料及化学制品制造业	四川省	510000	成都市	510100
912	2021	0.322272	32.2272	2	1.60944	0.0139687	15.73	0.693147	100	0.8	0.4203	0	0.085512	2.30259	0.693147	C26	化学原料及化学制品制造业	四川省	510000	成都市	510100
912	2022	0.0720086	7.20086	2	1.09861	0.0125792	15.3	0	0	0.94	0.3742	0	0.064996	2.48491	0	C26	化学原料及化学制品制造业	四川省	510000	成都市	510100
912	2023	0.0848043	8.48043	2	2.19722	0.0107863	15.08	0	0	0.94	0.3643	0	0.023001	2.07944	0.693147	C26	化学原料及化学制品制造业	四川省	510000	成都市	510100
913	2011	0.112193	11.2193	2	0	0.0432112	0	0	0	0	0.15	1	-0.006355	0	3.09104	C37	铁路、船舶、航空航天和其它运输设备制造业	浙江省	330000	温岭市	331081
913	2012	0.109099	10.9099	2	0	0.0489808	0	0	0	0	0.1877	1	0.598412	0	2.3979	C37	铁路、船舶、航空航天和其它运输设备制造业	浙江省	330000	温岭市	331081
913	2013	0.166191	16.6191	2	0	0.0477423	0	1.09861	9.09091	0	0.199	1	-0.023059	0	3.13549	C37	铁路、船舶、航空航天和其它运输设备制造业	浙江省	330000	温岭市	331081
913	2014	0.103152	10.3153	1	0	0.049711	0	0	0	0	0.2337	1	-0.079915	0	2.89037	C37	铁路、船舶、航空航天和其它运输设备制造业	浙江省	330000	温岭市	331081
913	2015	0.0681839	6.81839	1	0	0.0504865	4.55	0.693147	5	0.26	0.2337	0	-0.031164	0	3.04452	C37	铁路、船舶、航空航天和其它运输设备制造业	浙江省	330000	温岭市	331081
913	2017	0.118596	11.8596	1	0	0.0377652	5.15	0	0	0.09	0.1883	1	0.066869	1.09861	3.55535	C37	铁路、船舶、航空航天和其它运输设备制造业	浙江省	330000	温岭市	331081
913	2018	0.0730227	7.30227	2	1.09861	0.0326298	5.82	0	0	0.37	0.1915	0	-0.003083	1.09861	3.71357	C37	铁路、船舶、航空航天和其它运输设备制造业	浙江省	330000	温岭市	331081
913	2019	0.0646088	6.46088	2	0.693147	0.0258484	7.69	0	0	0.05	0.1712	0	0.062566	1.09861	3.17805	C37	铁路、船舶、航空航天和其它运输设备制造业	浙江省	330000	温岭市	331081
913	2020	0.113697	11.3697	2	1.09861	0.0265845	11.41	1.09861	3.77359	0.24	0.1603	0	0.003712	0.693147	3.98898	C37	铁路、船舶、航空航天和其它运输设备制造业	浙江省	330000	温岭市	331081
913	2021	0.213304	21.3304	2	1.38629	0.0252287	12.91	1.60944	4.3956	0.53	0.1305	1	0.123251	1.38629	4.52179	C37	铁路、船舶、航空航天和其它运输设备制造业	浙江省	330000	温岭市	331081
913	2022	0.223962	22.3962	2	1.79176	0.0538944	12.57	1.60944	5	0.5	0.1564	1	0.165851	1.79176	4.39445	C37	铁路、船舶、航空航天和其它运输设备制造业	浙江省	330000	温岭市	331081
913	2023	0.130575	13.0575	5	2.07944	0.0413592	13.83	0	0	0.79	0.1309	0	0.265799	1.60944	4.31749	C37	铁路、船舶、航空航天和其它运输设备制造业	浙江省	330000	温岭市	331081
915	2011	0.0305511	3.05511	1	0	0.138468	0	0	0	8.77	0.3215	0	0.184313	0	0	C27	医药制造业	山东省	370000	临沂市	371300
915	2012	0.0570227	5.70227	3	0	0.114696	0	0	0	2.48	0.2752	0	0.229859	1.09861	0.693147	C27	医药制造业	山东省	370000	临沂市	371300
915	2013	0.155824	15.5824	3	0	0.0974208	0	1.09861	25	2.99	0.2669	0	0.226271	1.38629	2.19722	C27	医药制造业	山东省	370000	临沂市	371300
915	2014	0.116392	11.6392	3	0	0.0741702	0	0.693147	20	3.75	0.2239	0	0.277671	0	1.79176	C27	医药制造业	山东省	370000	临沂市	371300
915	2015	0.17195	17.195	2	1.09861	0.072782	9.24	1.38629	27.2727	3.97	0.2572	0	0.133122	0.693147	2.48491	C27	医药制造业	山东省	370000	临沂市	371300
915	2016	0.26261	26.261	2	0	0.0594147	9.09	1.94591	66.6667	4.58	0.2104	0	0.160609	1.09861	2.30259	C27	医药制造业	山东省	370000	临沂市	371300
915	2017	0.169529	16.9529	3	0	0.0311183	8.98	1.09861	33.3333	4.53	0.2316	0	0.138165	0.693147	1.94591	C27	医药制造业	山东省	370000	临沂市	371300
915	2018	0.250745	25.0745	2	0	0.057016	8.51	1.38629	75	4.76	0.2244	0	0.055056	0	1.60944	C27	医药制造业	山东省	370000	临沂市	371300
915	2019	0.190802	19.0802	3	0	0.0527809	8.21	0.693147	50	5.41	0.2494	0	0.0967	0.693147	1.09861	C27	医药制造业	山东省	370000	临沂市	371300
915	2020	0.167306	16.7306	2	0.693147	0.0424726	7.89	1.09861	33.3333	5.51	0.2449	0	0.143392	0.693147	1.94591	C27	医药制造业	山东省	370000	临沂市	371300
915	2021	0.0289563	2.89563	1	0	0.0442385	7.75	0	0	5.37	0.223	0	0.158127	0.693147	0	C27	医药制造业	山东省	370000	临沂市	371300
915	2022	0.0256079	2.56079	1	0	0.0371366	6.1	0	0	5.07	0.1872	0	0.19476	0.693147	0	C27	医药制造业	山东省	370000	临沂市	371300
915	2023	0.0511008	5.11008	1	1.60944	0.0322729	13.98	0	0	4.71	0.174	0	0.107148	1.09861	0	C27	医药制造业	山东省	370000	临沂市	371300
919	2011	0.0109357	1.22037	1	0	0.0224869	0	0	0	2.73	0.1656	0	0.057275	0	0	C27	医药制造业	江苏省	320000	南京市	320100
919	2012	0.0195152	1.95152	1	0	0.0323754	0	0	0	2.79	0.2178	0	0.060425	0.693147	0	C27	医药制造业	江苏省	320000	南京市	320100
919	2013	0.0371993	3.71993	1	0.693147	0.0306153	0	0	0	2.9049	0.2762	0	0.044081	0.693147	1.09861	C27	医药制造业	江苏省	320000	南京市	320100
919	2014	0.105881	10.5881	1	0	0.0350283	0	0	0	3.14	0.2816	1	0.068565	0.693147	1.79176	C27	医药制造业	江苏省	320000	南京市	320100
919	2015	0.11271	11.271	1	1.38629	0.0342573	2.63	0	0	3.25	0.2564	1	0.063086	1.09861	0	C27	医药制造业	江苏省	320000	南京市	320100
919	2016	0.105701	10.5701	1	0.693147	0.0326635	2.61	0	0	3.8138	0.2566	1	0.043923	1.09861	0	C27	医药制造业	江苏省	320000	南京市	320100
919	2017	0.111089	11.1089	1	1.09861	0.0319623	2.63	0	0	4.98	0.2481	1	0.00029	1.09861	0	C27	医药制造业	江苏省	320000	南京市	320100
919	2018	0.103697	10.3697	1	0	0.0430523	3	0	0	5.49	0.2647	1	0.062928	1.38629	0	C27	医药制造业	江苏省	320000	南京市	320100
919	2019	0.100061	10.0061	1	0	0.0376104	2.66	0	0	6.19	0.2283	1	0.055045	1.09861	0	C27	医药制造业	江苏省	320000	南京市	320100
919	2020	0.069086	6.9086	2	0.693147	0.0345934	2.33	0	0	8.86	0.3008	0	0.002461	0.693147	2.63906	C27	医药制造业	江苏省	320000	南京市	320100
919	2021	0.04219	4.219	1	0	0.0315213	2.3	0	0	7.81	0.2843	0	0.029543	1.60944	0.693147	C27	医药制造业	江苏省	320000	南京市	320100
919	2022	0.103543	10.3543	1	0	0.0568838	2.52	0.693147	12.5	8.22	0.2772	0	0.026166	1.79176	2.19722	C27	医药制造业	江苏省	320000	南京市	320100
919	2023	0.0986429	9.86429	1	0	0.0586687	2.69	0.693147	9.09091	8.22	0.2851	0	0.01598	1.79176	2.48491	C27	医药制造业	江苏省	320000	南京市	320100
920	2011	0.0797483	7.97483	2	0	0.0559894	0	0.693147	7.69231	0	0.2475	0	0.060171	0	2.63906	C37	铁路、船舶、航空航天和其它运输设备制造业	贵州省	520000	贵阳市	520100
920	2012	0.086687	8.6687	2	0	0.0545043	0	0.693147	12.5	0.18	0.2324	0	0.162297	0	2.19722	C37	铁路、船舶、航空航天和其它运输设备制造业	贵州省	520000	贵阳市	520100
920	2013	0.141247	14.1247	2	0	0.054947	0	1.38629	27.2727	0.5343	0.2266	0	0.125502	0	2.48491	C37	铁路、船舶、航空航天和其它运输设备制造业	贵州省	520000	贵阳市	520100
920	2015	0.0510749	5.10749	1	0.693147	0.0600659	10.94	0	0	2.3	0.2525	0	-0.013906	1.38629	1.09861	C37	铁路、船舶、航空航天和其它运输设备制造业	贵州省	520000	贵阳市	520100
920	2016	0.050489	5.0489	1	1.09861	0.0571098	9.69	0	0	2.6201	0.2933	0	-0.161896	0.693147	1.09861	C26	化学原料及化学制品制造业	贵州省	520000	贵阳市	520100
920	2017	0.0478712	4.78712	1	0.693147	0.0546	9.18	0	0	2.54	0.2817	0	0.074686	1.94591	0	C26	化学原料及化学制品制造业	贵州省	520000	贵阳市	520100
920	2018	0.0693478	6.93478	2	1.94591	0.0386175	9.79	0	0	2.55	0.2389	0	0.012294	1.79176	0	C26	化学原料及化学制品制造业	贵州省	520000	贵阳市	520100
920	2019	0.0573686	5.73686	2	0.693147	0.0373603	11.48	0	0	3.46	0.265	0	0.283726	1.60944	0	C26	化学原料及化学制品制造业	贵州省	520000	贵阳市	520100
920	2020	0.0562789	5.62789	2	0.693147	0.0969751	12.38	0	0	3.9	0.2324	0	0.11029	1.09861	0	C26	化学原料及化学制品制造业	贵州省	520000	贵阳市	520100
920	2021	0.201581	20.1581	2	0.693147	0.0946061	11.98	0.693147	20	3.97	0.1958	1	-0.001399	1.09861	1.79176	C26	化学原料及化学制品制造业	贵州省	520000	贵阳市	520100
920	2022	0.155225	15.5225	2	1.09861	0.0765277	18.58	0	0	3.69	0.1638	1	0.346608	1.79176	2.48491	C26	化学原料及化学制品制造业	贵州省	520000	贵阳市	520100
920	2023	0.207976	20.7976	3	1.09861	0.0871201	17.22	0.693147	4.7619	4.49	0.2906	1	0.022593	1.94591	3.09104	C26	化学原料及化学制品制造业	贵州省	520000	贵阳市	520100
921	2013	0.14129	14.129	4	1.09861	0.0436102	0	0	0	0.7948	0.198	1	0.699404	1.60944	0	C38	电气机械及器材制造业	广东省	440000	佛山市	440600
921	2014	0.158332	15.8332	4	2.07944	0.0505732	0	0	0	0.92	0.221	1	0.237877	1.60944	0.693147	C38	电气机械及器材制造业	广东省	440000	佛山市	440600
921	2015	0.137938	13.7938	3	1.38629	0.0485824	3.02	0	0	1.15	0.247	1	0.135317	1.60944	0	C38	电气机械及器材制造业	广东省	440000	佛山市	440600
921	2016	0.149756	14.9756	4	2.3979	0.0386953	3.22	0	0	1.3749	0.1827	1	0.189917	0.693147	0	C38	电气机械及器材制造业	广东省	440000	佛山市	440600
921	2017	0.142245	14.2246	3	2.30259	0.0331522	3.47	0	0	1.64	0.1505	1	0.331306	1.38629	0	C38	电气机械及器材制造业	广东省	440000	佛山市	440600
921	2018	0.144729	14.4729	5	1.38629	0.0327428	3.98	0	0	2.88	0.1495	1	0.113198	0	0	C38	电气机械及器材制造业	广东省	440000	佛山市	440600
921	2019	0.13096	13.096	4	1.09861	0.0564291	4.9	0	0	2.95	0.1122	1	0.581977	0	0	C38	电气机械及器材制造业	广东省	440000	佛山市	440600
921	2020	0.137771	13.7772	4	1.38629	0.0417359	4.28	0	0	2.81	0.0928	1	0.154289	0.693147	0	C38	电气机械及器材制造业	广东省	440000	佛山市	440600
921	2021	0.161763	16.1763	4	1.60944	0.0293922	5.99	0	0	3.96	0.0927	1	0.082236	1.38629	1.94591	C38	电气机械及器材制造业	广东省	440000	佛山市	440600
921	2022	0.191419	19.142	4	2.19722	0.0263585	6.21	0	0	4.39	0.096	1	0.044096	2.07944	4.30406	C38	电气机械及器材制造业	广东省	440000	佛山市	440600
921	2023	0.220895	22.0895	5	2.3979	0.0203476	0	2.30259	12.8571	4.59	0.0859	0	0.191471	1.79176	4.26268	C38	电气机械及器材制造业	广东省	440000	佛山市	440600
922	2013	0.0924528	9.24528	2	0	0.0458557	0	0	0	0.9015	0.1763	1	0.000968	0	0	C38	电气机械及器材制造业	黑龙江省	230000	佳木斯市	230800
922	2014	0.0925039	9.25039	2	0	0.0507284	0	0	0	1.08	0.1651	1	0.369853	0	0	C38	电气机械及器材制造业	黑龙江省	230000	佳木斯市	230800
922	2015	0.109722	10.9722	2	0	0.0570941	13.2	0	0	1.58	0.1864	1	-0.117324	0.693147	0	C38	电气机械及器材制造业	黑龙江省	230000	佳木斯市	230800
922	2016	0.1245	12.45	2	0.693147	0.0632582	14.2	0	0	1.7691	0.1874	1	-0.233482	1.38629	0	C38	电气机械及器材制造业	黑龙江省	230000	佳木斯市	230800
922	2018	0.132602	13.2602	2	1.94591	0.0318575	14.39	0	0	0	0.1391	1	0.179327	1.38629	0	C38	电气机械及器材制造业	黑龙江省	230000	佳木斯市	230800
922	2019	0.122005	12.2005	2	0.693147	0.0268579	15.12	0	0	0	0.1229	1	0.189496	1.79176	0	C38	电气机械及器材制造业	黑龙江省	230000	佳木斯市	230800
922	2020	0.116399	11.6399	2	0.693147	0.0306598	14.94	0	0	0	0.1281	1	0.172483	1.09861	0	C38	电气机械及器材制造业	黑龙江省	230000	佳木斯市	230800
922	2021	0.101562	10.1562	1	1.09861	0.0246826	0	0	0	0	0.0987	1	0.05113	1.60944	0	C38	电气机械及器材制造业	黑龙江省	230000	佳木斯市	230800
922	2022	0.113551	11.3551	1	1.60944	0.0216111	12.33	0	0	0	0.0874	1	0.118103	1.38629	0	C38	电气机械及器材制造业	黑龙江省	230000	佳木斯市	230800
922	2023	0.0432062	4.32062	1	1.60944	0.0181702	18.11	0	0	0	0.1419	0	-0.007283	0.693147	0	C38	电气机械及器材制造业	黑龙江省	230000	佳木斯市	230800
923	2011	0.0152619	1.52619	1	0	0.0636938	0	0	0	0	0.0969	0	-0.0641	0	1.09861	C35	专用设备制造业	河北省	130000	张家口市	130700
923	2012	0.018636	1.8636	1	0	0.0555128	0	0	0	0	0.1022	0	0.028197	0	1.60944	C35	专用设备制造业	河北省	130000	张家口市	130700
923	2013	0.0077874	1.22037	1	0	0.0710847	0	0	0	0	0.0946	0	-0.124961	0	0	C35	专用设备制造业	河北省	130000	张家口市	130700
923	2014	0.0265234	2.65234	1	0	0.0719198	0	0	0	0	0.154	0	-0.139898	0	2.30259	C35	专用设备制造业	河北省	130000	张家口市	130700
923	2015	0.0395512	3.95512	1	0	0.0699247	6.44	0	0	0	0.2962	0	-0.062777	0	2.70805	C35	专用设备制造业	河北省	130000	张家口市	130700
923	2016	0.0383219	3.83219	1	0	0.0701961	6.68	0	0	0	0.3004	0	-0.031499	0	2.48491	C35	专用设备制造业	河北省	130000	张家口市	130700
923	2017	0.0410619	4.10619	1	0	0.0770057	6.69	0	0	0	0.0816	0	0.629517	1.09861	2.70805	C35	专用设备制造业	河北省	130000	张家口市	130700
925	2011	0.0494175	4.94175	2	0	0.188234	0	0	0	12.9	0.0226	0	0.691774	1.38629	0	C35	专用设备制造业	浙江省	330000	杭州市	330100
925	2012	0.144344	14.4344	3	0.693147	0.230208	0	0	0	11.75	0.0878	1	0.031739	1.60944	0	C35	专用设备制造业	浙江省	330000	杭州市	330100
925	2013	0.160228	16.0228	3	0.693147	0.209292	0	0	0	13.3043	0.0861	1	-0.091523	1.79176	1.94591	C35	专用设备制造业	浙江省	330000	杭州市	330100
925	2014	0.175404	17.5404	3	0.693147	0.206526	0	0	0	18.63	0.0742	1	0.00708	2.48491	2.48491	C35	专用设备制造业	浙江省	330000	杭州市	330100
925	2015	0.283623	28.3623	3	1.09861	0.171626	33.36	1.38629	17.6471	13.39	0.0636	1	0.318495	3.2581	2.89037	C35	专用设备制造业	浙江省	330000	杭州市	330100
925	2016	0.354701	35.4701	3	1.38629	0.220282	21.87	1.79176	45.4545	13.01	0.0662	1	-0.073155	3.73767	2.48491	C35	专用设备制造业	浙江省	330000	杭州市	330100
925	2017	0.349191	34.9191	3	3.52636	0.170032	22.51	1.94591	30	13.61	0.0573	1	1.0866	3.58352	3.04452	C35	专用设备制造业	浙江省	330000	杭州市	330100
925	2018	0.337949	33.7949	5	4.17439	0.149749	23.37	1.38629	20	15.65	0.0515	1	0.016043	3.29584	2.77259	C35	专用设备制造业	浙江省	330000	杭州市	330100
925	2019	0.278398	27.8398	5	3.3673	0.131355	25.24	0.693147	9.09091	12.76	0.0479	1	0.023395	3.09104	2.48491	C35	专用设备制造业	浙江省	330000	杭州市	330100
925	2020	0.479535	36.9914	5	4.26268	0.0964629	24.57	2.77259	68.1818	15.39	0	1	0.012679	2.94444	3.13549	C35	专用设备制造业	浙江省	330000	杭州市	330100
925	2021	0.400538	36.9914	1	4.31749	0.069774	22.43	2.89037	56.6667	13.75	0	1	0.104429	1.79176	3.43399	C35	专用设备制造业	浙江省	330000	杭州市	330100
925	2022	0.368062	36.8062	1	4.26268	0.0677053	22.53	2.56495	48	13.16	0	1	0.087908	1.60944	3.2581	C35	专用设备制造业	浙江省	330000	杭州市	330100
925	2023	0.313015	31.3015	1	4.40672	0.0590136	27.07	2.89037	51.5151	13.16	0	0	0.018381	0.693147	3.52636	C35	专用设备制造业	浙江省	330000	杭州市	330100
927	2011	0.116032	11.6033	2	0	0.0337453	0	0	0	2.17	0.2833	1	0.017853	1.60944	0.693147	C36	汽车制造业	天津市	120000	天津市	120000
927	2012	0.101663	10.1663	2	0	0.0367274	0	0	0	2.04	0.3907	1	0.001281	0	0	C36	汽车制造业	天津市	120000	天津市	120000
927	2013	0.345497	34.5497	2	0	0.0384236	0	0.693147	100	1.9083	0.3828	1	-0.133009	0	0.693147	C36	汽车制造业	天津市	120000	天津市	120000
927	2014	0.110869	11.0869	2	0	0.0645758	0	0	0	1.94	0.4379	1	-0.517238	0.693147	0	C36	汽车制造业	天津市	120000	天津市	120000
927	2016	0.091059	9.1059	1	0	0.0394042	0	0	0	1.0863	0.2815	1	0.102759	0.693147	0	C36	汽车制造业	天津市	120000	天津市	120000
927	2017	0.126845	12.6845	3	1.38629	0.0364226	0	0	0	1.17	0.2366	1	-0.948886	0.693147	0	C36	汽车制造业	天津市	120000	天津市	120000
927	2018	0.139381	13.9381	3	1.79176	0.0392267	0	0	0	0.8808	0.2964	1	0.360607	1.38629	0	C36	汽车制造业	天津市	120000	天津市	120000
930	2012	0.0922867	9.22867	2	0	0.0536611	0	0.693147	6.66667	0.57	0.5863	0	0.04438	0	2.77259	C26	化学原料及化学制品制造业	安徽省	340000	蚌埠市	340300
930	2013	0.15085	15.085	3	0	0.0544354	0	1.79176	9.25926	0.6407	0.6156	0	0.00794	0	4.00733	C26	化学原料及化学制品制造业	安徽省	340000	蚌埠市	340300
930	2014	0.101714	10.1714	3	0	0.049667	0	0.693147	2.5641	0.736	0.6037	0	0.003321	0	3.68888	C26	化学原料及化学制品制造业	安徽省	340000	蚌埠市	340300
930	2015	0.15562	15.562	1	0	0.0606524	8.67	0.693147	3.84615	0.88	0.4231	1	-0.492958	0.693147	3.29584	C26	化学原料及化学制品制造业	安徽省	340000	蚌埠市	340300
930	2016	0.164039	16.4039	1	0	0.0612758	15.45	0.693147	7.14286	1.13	0.4259	1	0.083927	0.693147	2.70805	C26	化学原料及化学制品制造业	安徽省	340000	蚌埠市	340300
930	2017	0.131443	13.1443	1	0	0.0748129	12.75	0	0	0.99	0.3656	1	0.149795	2.3979	1.60944	C26	化学原料及化学制品制造业	安徽省	340000	蚌埠市	340300
930	2018	0.127389	12.7389	2	0	0.0442945	4.1	0	0	1.36	0.4164	1	0.619306	1.09861	1.79176	C26	化学原料及化学制品制造业	安徽省	340000	蚌埠市	340300
930	2019	0.131184	13.1184	3	0	0.0479784	4.23	0	0	1.68	0.471	1	0.057752	1.38629	0	C26	化学原料及化学制品制造业	安徽省	340000	蚌埠市	340300
930	2020	0.145992	14.5992	3	0	0.0415753	5.2	0	0	1.91	0.3835	1	0.058698	1.38629	2.48491	C26	化学原料及化学制品制造业	安徽省	340000	蚌埠市	340300
930	2021	0.148807	14.8806	2	1.60944	0.0348219	5.84	0	0	1.49	0.4312	1	0.088587	2.30259	0.693147	C26	化学原料及化学制品制造业	安徽省	340000	蚌埠市	340300
930	2022	0.155744	15.5744	2	1.60944	0.0336502	5.79	0	0	1.7	0.4643	1	0.06434	1.79176	2.07944	C26	化学原料及化学制品制造业	安徽省	340000	蚌埠市	340300
930	2023	0.117973	11.7973	6	0.693147	0.0363058	5.52	0	0	1.79	0.4894	0	-0.132407	1.79176	1.60944	C26	化学原料及化学制品制造业	安徽省	340000	蚌埠市	340300
931	2018	0.122491	12.2491	1	1.79176	0.0430302	13.42	0	0	3.45	0.1754	1	0.057327	1.09861	0	C27	医药制造业	北京市	110000	北京市	110000
931	2019	0.117776	11.7776	1	1.09861	0.0405673	15.68	0	0	3.77	0.2003	1	-0.019136	1.09861	0	C27	医药制造业	北京市	110000	北京市	110000
931	2020	0.134854	13.4855	2	1.09861	0.039808	16.96	0	0	3.6	0.2198	1	0.02902	1.60944	0	C27	医药制造业	北京市	110000	北京市	110000
931	2021	0.132375	13.2375	1	1.60944	0.0345453	21.3	0	0	3.17	0.242	1	-0.050951	1.60944	0	C27	医药制造业	北京市	110000	北京市	110000
931	2022	0.114045	11.4045	1	0.693147	0.0343939	8.6	0	0	3.62	0.2511	1	-0.077934	1.60944	0	C27	医药制造业	北京市	110000	北京市	110000
931	2023	0.0446034	4.46034	1	1.09861	0.0297638	8.96	0	0	3.08	0.2316	0	0.035987	1.38629	0	C27	医药制造业	北京市	110000	北京市	110000
936	2011	0.101131	10.1131	1	0	0.007665	0	0	0	0	0.2148	1	-0.042515	1.38629	1.38629	C28	化学纤维制造业	江苏省	320000	江阴市	320281
936	2012	0.0970436	9.70436	1	0	0.0076025	0	0	0	0	0.1878	1	0.052899	1.60944	0.693147	C28	化学纤维制造业	江苏省	320000	江阴市	320281
936	2013	0.0836712	8.36712	1	0	0.0077279	0	0	0	0	0.171	1	-0.007108	0.693147	0	C28	化学纤维制造业	江苏省	320000	江阴市	320281
936	2014	0.0757155	7.57155	1	0	0.0061857	0	0	0	0	0.1207	1	0.198879	0	0	C28	化学纤维制造业	江苏省	320000	江阴市	320281
936	2015	0.0271055	2.71055	1	2.07944	0.0053788	0.69	0	0	0	0.0915	0	0.241914	0	0	C28	化学纤维制造业	江苏省	320000	江阴市	320281
936	2016	0.0341508	3.41508	1	2.07944	0.0023569	0.67	0	0	0	0.0374	0	0.700813	1.09861	0	C28	化学纤维制造业	江苏省	320000	江阴市	320281
936	2017	0.026945	2.6945	1	2.30259	0.0019359	0.77	0	0	0	0.0293	0	-0.059983	0	0	C28	化学纤维制造业	江苏省	320000	江阴市	320281
936	2018	0.0143545	1.43545	1	1.09861	0.0018665	0.88	0	0	0	0.0408	0	0.064821	0	0	C28	化学纤维制造业	江苏省	320000	江阴市	320281
936	2019	0.0171932	1.71932	1	1.38629	0.0016732	0.85	0	0	0	0.034	0	0.177661	0	0	C28	化学纤维制造业	江苏省	320000	江阴市	320281
936	2020	0.0916225	9.16225	1	1.09861	0.00223	1.41	0	0	0	0.0508	1	-0.179597	0.693147	0	C28	化学纤维制造业	江苏省	320000	江阴市	320281
936	2021	0.134578	13.4578	2	1.38629	0.0032211	6.97	0	0	0	0.0629	1	0.062859	1.09861	2.89037	C28	化学纤维制造业	江苏省	320000	江阴市	320281
936	2022	0.134069	13.4069	2	1.38629	0.003265	7.39	0	0	0	0.0762	1	-0.014795	2.19722	1.38629	C28	化学纤维制造业	江苏省	320000	江阴市	320281
936	2023	0.0417246	4.17246	2	0	0.0031126	5.23	0	0	0	0.0722	0	0.012176	2.19722	0.693147	C28	化学纤维制造业	江苏省	320000	江阴市	320281
938	2012	0.127561	12.7561	1	3.17805	0.0215547	0	0	0	6.72	0.0175	1	0.322041	0	1.79176	C39	计算机、通信和其他电子设备制造业	北京市	110000	北京市	110000
938	2013	0.145185	14.5185	1	4.02535	0.0234544	0	0	0	5.6872	0.016	1	0.09974	0.693147	2.30259	C39	计算机、通信和其他电子设备制造业	北京市	110000	北京市	110000
938	2014	0.125504	12.5504	1	3.93183	0.0178123	0	0	0	4.96	0.0109	1	0.619533	0	0.693147	C39	计算机、通信和其他电子设备制造业	北京市	110000	北京市	110000
938	2015	0.153374	15.3374	1	4.06044	0.0151337	24.23	0	0	5.18	0.0089	1	0.281049	0	1.94591	C39	计算机、通信和其他电子设备制造业	北京市	110000	北京市	110000
938	2016	0.195858	19.5859	1	4.56435	0.101239	39.21	0	0	25.65	0.0095	1	9.07788	0	1.60944	C39	计算机、通信和其他电子设备制造业	北京市	110000	北京市	110000
938	2017	0.202018	20.2018	1	4.83628	0.0877525	47.22	0	0	29.09	0.0104	1	0.066495	0.693147	0	C39	计算机、通信和其他电子设备制造业	北京市	110000	北京市	110000
938	2018	0.207377	20.7377	2	4.89035	0.0754765	45.16	0	0	30.43	0.0118	1	0.053925	0	0	C39	计算机、通信和其他电子设备制造业	北京市	110000	北京市	110000
938	2019	0.244389	24.4389	4	5.03695	0.065675	45.64	0	0	31.9	0.011	1	0.060336	0	1.60944	C39	计算机、通信和其他电子设备制造业	北京市	110000	北京市	110000
938	2020	0.243043	24.3043	4	5.03695	0.0665857	43.95	0	0	31.77	0.0104	1	0.056268	0	1.60944	C39	计算机、通信和其他电子设备制造业	北京市	110000	北京市	110000
938	2021	0.226156	22.6156	3	5.03695	0.058413	40.93	0	0	30.45	0.0137	1	0.078671	0	1.38629	C39	计算机、通信和其他电子设备制造业	北京市	110000	北京市	110000
938	2022	0.233739	23.3739	3	4.91265	0.0499156	39.33	0	0	30.13	0.0141	1	0.06056	1.09861	1.60944	C39	计算机、通信和其他电子设备制造业	北京市	110000	北京市	110000
938	2023	0.151133	15.1133	3	4.96981	0.0471969	40.1	0	0	30.13	0.0121	0	0.058551	0	1.09861	C39	计算机、通信和其他电子设备制造业	北京市	110000	北京市	110000
949	2011	0.0483458	4.83458	2	0	0.0091192	0	0	0	0	0.4305	0	-0.017126	1.38629	1.09861	C28	化学纤维制造业	河南省	410000	新乡市	410700
949	2012	0.0554124	5.54124	2	0	0.0155468	0	0	0	0	0.5087	0	-0.075886	1.38629	1.60944	C28	化学纤维制造业	河南省	410000	新乡市	410700
949	2013	0.0304264	3.04264	1	0	0.01557	0	0	0	0	0.5128	0	0.017814	1.09861	0	C28	化学纤维制造业	河南省	410000	新乡市	410700
949	2014	0.0544911	5.44911	2	0	0.0146803	0	0	0	0	0.4782	0	0.390612	1.60944	1.38629	C28	化学纤维制造业	河南省	410000	新乡市	410700
949	2015	0.0709431	7.09431	2	0	0.0141584	12.16	0	0	0	0.5315	0	0.044578	2.07944	1.60944	C28	化学纤维制造业	河南省	410000	新乡市	410700
949	2016	0.0666382	6.66382	2	0	0.0120406	11.52	0	0	0	0.4769	0	0.419874	2.07944	1.38629	C28	化学纤维制造业	河南省	410000	新乡市	410700
949	2017	0.0637773	6.37773	1	0	0.0118644	12.71	0	0	0	0.4932	0	-0.001987	2.70805	1.60944	C28	化学纤维制造业	河南省	410000	新乡市	410700
949	2018	0.0578653	5.78653	1	0	0.009519	12.73	0	0	0	0.5423	0	0.028288	2.56495	0.693147	C28	化学纤维制造业	河南省	410000	新乡市	410700
949	2019	0.066386	6.6386	1	0	0.0089636	13.37	0	0	0	0.6228	0	0.030075	2.56495	1.38629	C28	化学纤维制造业	河南省	410000	新乡市	410700
949	2020	0.186538	18.6538	1	0.693147	0.015911	13.9	0.693147	6.25	0	0.5725	1	0.019062	2.48491	2.83321	C28	化学纤维制造业	河南省	410000	新乡市	410700
949	2021	0.152962	15.2962	2	0.693147	0.0122569	12.95	0	0	0	0.4281	1	0.611783	2.56495	2.07944	C28	化学纤维制造业	河南省	410000	新乡市	410700
949	2022	0.232097	23.2097	2	0.693147	0.0253342	13.06	1.60944	6.77966	0	0.5024	1	-0.114479	2.56495	4.09434	C28	化学纤维制造业	河南省	410000	新乡市	410700
949	2023	0.136128	13.6128	2	0.693147	0.023013	10.44	1.09861	5.12821	0	0.5036	0	-0.011461	2.30259	3.68888	C28	化学纤维制造业	河南省	410000	新乡市	410700
950	2011	0.0303044	3.03044	1	0	0.0228619	0	0	0	0	0.1239	0	0.053498	2.83321	0	C26	化学原料及化学制品制造业	重庆市	500000	重庆市	500000
950	2012	0.0565221	5.65221	3	0	0.0177358	0	0	0	0	0.5377	0	-0.032126	1.38629	0	C26	化学原料及化学制品制造业	重庆市	500000	重庆市	500000
950	2013	0.0351977	3.51977	2	0	0.0275813	0	0	0	0	0.4178	0	0.002353	0.693147	0	C26	化学原料及化学制品制造业	重庆市	500000	重庆市	500000
950	2014	0.0737803	7.37803	4	0	0.0675474	0	0	0	0	0.6802	0	-0.149862	1.09861	0	C26	化学原料及化学制品制造业	重庆市	500000	重庆市	500000
950	2015	0.0625482	6.25482	1	0.693147	0.0705183	10.02	0	0	0	0.7144	0	-0.174281	0	2.19722	C26	化学原料及化学制品制造业	重庆市	500000	重庆市	500000
951	2011	0.0090105	1.22037	1	0	0.0237324	0	0	0	2.7	0.1157	0	0.070423	0	0	C36	汽车制造业	山东省	370000	济南市	370100
951	2012	0.0155979	1.55979	1	0	0.0309438	0	0	0	1.48	0.1583	0	-0.014541	0.693147	0	C36	汽车制造业	山东省	370000	济南市	370100
951	2013	0.0198447	1.98447	1	0	0.0257973	0	0	0	1.2868	0.1293	0	0.11666	1.38629	0	C36	汽车制造业	山东省	370000	济南市	370100
951	2014	0.0870399	8.70399	1	0	0.0237408	0	0	0	1.33	0.1072	1	0.043974	1.09861	0	C36	汽车制造业	山东省	370000	济南市	370100
951	2015	0.104497	10.4497	1	1.38629	0.0228195	4.2	0	0	1.21	0.0943	1	0.045094	1.09861	0	C36	汽车制造业	山东省	370000	济南市	370100
951	2016	0.110926	11.0926	1	2.07944	0.0185974	4.2	0	0	1.261	0.0703	1	0.059788	1.09861	0	C36	汽车制造业	山东省	370000	济南市	370100
951	2017	0.102019	10.2019	1	0.693147	0.0136468	4.51	0	0	1.23	0.047	1	0.17416	1.94591	0	C36	汽车制造业	山东省	370000	济南市	370100
951	2018	0.100893	10.0893	1	0.693147	0.0165204	4.13	0	0	1.21	0.0552	1	0.074258	1.79176	0	C36	汽车制造业	山东省	370000	济南市	370100
951	2019	0.128776	12.8776	2	2.19722	0.0148628	4.73	0	0	1.1302	0.0543	1	0.145167	1.79176	0	C36	汽车制造业	山东省	370000	济南市	370100
951	2020	0.0695181	6.95181	2	3.04452	0.0241954	9	0	0	1.91	0.032	0	0.20112	1.60944	0	C36	汽车制造业	山东省	370000	济南市	370100
951	2021	0.0617099	6.17099	1	2.99573	0.0246789	6.63	0	0	2.35	0.0908	0	0.585147	1.94591	0	C36	汽车制造业	山东省	370000	济南市	370100
951	2022	0.0798428	7.98428	3	2.48491	0.0247409	8.56	0	0	1.99	0.1287	0	-0.02566	1.79176	0	C36	汽车制造业	山东省	370000	济南市	370100
951	2023	0.0741568	7.41568	3	2.48491	0.0223513	10.54	0	0	1.56	0.1134	0	0.077637	1.09861	0	C36	汽车制造业	山东省	370000	济南市	370100
952	2011	0.0548354	5.48354	3	0	0.0497597	0	0	0	0	0.4002	0	0.028883	1.60944	0	C27	医药制造业	湖北省	420000	武穴市	421182
952	2012	0.0635843	6.35843	3	0	0.122684	0	0	0	0.73	0.4193	0	-0.119905	1.38629	0.693147	C27	医药制造业	湖北省	420000	武穴市	421182
952	2013	0.0601104	6.01104	3	0	0.119237	0	0	0	0.747	0.4123	0	-0.032901	1.60944	0	C27	医药制造业	湖北省	420000	武穴市	421182
952	2014	0.059091	5.9091	3	0	0.115564	0	0	0	0.88	0.3486	0	-0.312354	1.79176	0	C27	医药制造业	湖北省	420000	武穴市	421182
952	2015	0.0736685	7.36685	3	0	0.113139	11.99	0	0	0.82	0.3159	0	0.01665	2.07944	0.693147	C27	医药制造业	湖北省	420000	武穴市	421182
952	2016	0.082509	8.2509	3	0	0.108561	10.25	0	0	1.1	0.5456	0	0.282793	2.19722	0.693147	C27	医药制造业	湖北省	420000	武穴市	421182
952	2017	0.0835066	8.35066	3	0	0.0998509	11.7	0	0	1.45	0.5475	0	0.16089	2.77259	0	C27	医药制造业	湖北省	420000	武穴市	421182
952	2018	0.0567735	5.67734	1	0	0.0945455	14.44	0	0	1.34	0.5031	0	0.151225	2.30259	0	C27	医药制造业	湖北省	420000	武穴市	421182
952	2019	0.0624842	6.24843	1	0	0.0948701	14.17	0	0	1.51	0.4978	0	0.094602	2.07944	1.09861	C27	医药制造业	湖北省	420000	武穴市	421182
952	2020	0.214907	21.4907	3	0	0.081624	15.05	0.693147	50	1.39	0.4422	0	0.416252	2.3979	1.09861	C27	医药制造业	湖北省	420000	武穴市	421182
952	2021	0.121877	12.1877	1	0	0.0755154	15.41	0	0	1.37	0.4209	1	0.062323	2.07944	0	C27	医药制造业	湖北省	420000	武穴市	421182
952	2022	0.135484	13.5484	1	1.09861	0.0610016	16.16	0	0	2.31	0.3794	1	0.028262	1.79176	0.693147	C27	医药制造业	湖北省	420000	武穴市	421182
952	2023	0.0646746	6.46746	1	0.693147	0.0716002	13.53	0	0	2.31	0.5192	0	-0.06661	1.79176	0.693147	C27	医药制造业	湖北省	420000	武穴市	421182
953	2014	0.0373627	3.73627	1	0	0	0	0	0	0	0.3789	0	-0.557508	2.63906	0	C26	化学原料及化学制品制造业	广西壮族自治区	450000	河池市	451200
953	2015	0.037542	3.7542	1	0	0	0	0	0	0	0.4168	0	-0.548333	2.48491	0	C26	化学原料及化学制品制造业	广西壮族自治区	450000	河池市	451200
953	2021	0.0642644	6.42644	1	0.693147	0.0709143	32.53	0	0	1.65	0.3038	0	0.064203	1.79176	0	C27	医药制造业	广西壮族自治区	450000	河池市	451200
953	2022	0.0551065	5.51065	1	0	0.0910242	17.44	0	0	2.13	0.4986	0	-0.513501	1.79176	0	C27	医药制造业	广西壮族自治区	450000	河池市	451200
953	2023	0.0627782	6.27782	1	0.693147	0.0859161	16.57	0	0	2.13	0.5247	0	-0.122237	1.79176	0	C27	医药制造业	广西壮族自治区	450000	河池市	451200
957	2011	0.0305503	3.05503	1	0	0.0701424	0	0	0	0.94	0.1254	0	0.065005	0	2.89037	C36	汽车制造业	山东省	370000	聊城市	371500
957	2012	0.071902	7.1902	1	0	0.0971619	0	0.693147	6.25	1.53	0.1262	0	0.100736	0.693147	2.83321	C36	汽车制造业	山东省	370000	聊城市	371500
957	2013	0.0586385	5.86385	2	0	0.100594	0	0	0	1.7744	0.1121	0	0.157486	1.09861	3.63759	C36	汽车制造业	山东省	370000	聊城市	371500
957	2014	0.101959	10.1959	2	0	0.07675	0	1.09861	5.40541	2.18	0.22	0	0.342721	0.693147	3.63759	C36	汽车制造业	山东省	370000	聊城市	371500
957	2015	0.0938134	9.38134	1	0	0.0447096	10.78	1.09861	5.55556	2.16	0.1437	0	0.999492	0.693147	3.61092	C36	汽车制造业	山东省	370000	聊城市	371500
957	2016	0.0843921	8.43921	1	0.693147	0.0375013	11.3	0.693147	2.85714	2.87	0.1445	0	0.206592	0.693147	3.58352	C36	汽车制造业	山东省	370000	聊城市	371500
957	2017	0.0966137	9.66137	1	0	0.0297553	11.1	1.09861	6.45161	3.11	0.0923	0	0.077118	1.09861	3.46574	C36	汽车制造业	山东省	370000	聊城市	371500
957	2018	0.145479	14.5479	1	1.09861	0.0294671	12.62	1.79176	11.3636	3.31	0.093	0	-0.02647	1.38629	3.80666	C36	汽车制造业	山东省	370000	聊城市	371500
957	2019	0.162967	16.2967	2	1.60944	0.0428026	10	1.60944	16	3.69	0.101	0	0.010201	1.38629	3.2581	C36	汽车制造业	山东省	370000	聊城市	371500
957	2020	0.213073	21.3073	2	2.3979	0.0474806	14.95	2.30259	23.6842	3.99	0.104	0	0.011969	1.09861	3.66356	C36	汽车制造业	山东省	370000	聊城市	371500
957	2021	0.143995	14.3995	1	1.94591	0.0500272	11.6	1.79176	6.94444	3.78	0.105	0	-0.076627	0.693147	4.29046	C36	汽车制造业	山东省	370000	聊城市	371500
957	2022	0.191741	19.1741	1	2.19722	0.0499946	15.83	2.3979	15.3846	4.41	0.1079	0	0.040432	1.38629	4.18966	C36	汽车制造业	山东省	370000	聊城市	371500
957	2023	0.17461	17.461	1	1.94591	0.0531748	16.1	2.30259	11.8421	4.81	0.1101	0	0.024798	0.693147	4.3438	C36	汽车制造业	山东省	370000	聊城市	371500
967	2011	0.0217813	2.17813	1	1.38629	0.019125	0	0	0	0	0.141	0	0.329835	0	0	C38	电气机械及器材制造业	浙江省	330000	绍兴市	330600
967	2012	0.0193246	1.93246	1	0	0.0328745	0	0	0	0	0.1523	0	0.204772	0	1.60944	C38	电气机械及器材制造业	浙江省	330000	绍兴市	330600
967	2013	0.115894	11.5894	2	0.693147	0.0296811	0	0	0	0	0.1562	1	0.106298	0.693147	1.79176	C38	电气机械及器材制造业	浙江省	330000	绍兴市	330600
967	2014	0.127947	12.7947	3	0	0.0287402	0	0	0	0	0.1425	1	0.54701	2.07944	1.38629	C38	电气机械及器材制造业	浙江省	330000	绍兴市	330600
967	2015	0.15142	15.142	3	1.38629	0.0131229	14.44	0	0	2.42	0.0697	1	1.35873	1.94591	1.38629	C38	电气机械及器材制造业	浙江省	330000	绍兴市	330600
967	2016	0.13352	13.352	2	2.30259	0.037831	6.5	0	0	3.06	0.0635	1	-0.000924	1.60944	0	C38	电气机械及器材制造业	浙江省	330000	绍兴市	330600
967	2017	0.131332	13.1332	1	2.48491	0.0646316	6.5	0	0	4.35	0.0405	1	0.293891	2.19722	0	C38	电气机械及器材制造业	浙江省	330000	绍兴市	330600
967	2018	0.155564	15.5564	2	2.99573	0.0956723	17.63	0	0	5.41	0.0356	1	0.033451	1.79176	0	C38	电气机械及器材制造业	浙江省	330000	绍兴市	330600
970	2011	0.119056	11.9056	3	0	0.0113191	1.8	0	0	1.45	0.1415	1	0.531593	1.38629	0.693147	C39	计算机、通信和其他电子设备制造业	北京市	110000	北京市	110000
970	2012	0.137363	13.7363	4	0	0.0141214	0	0	0	1.55	0.1482	1	0.460495	1.38629	1.79176	C39	计算机、通信和其他电子设备制造业	北京市	110000	北京市	110000
970	2013	0.125057	12.5057	4	0	0.0126486	0	0	0	1.6257	0.1591	1	0.080438	1.38629	0	C39	计算机、通信和其他电子设备制造业	北京市	110000	北京市	110000
970	2014	0.140267	14.0267	4	0	0.0122047	0	0	0	2.09	0.1612	1	0.048811	1.60944	1.79176	C39	计算机、通信和其他电子设备制造业	北京市	110000	北京市	110000
970	2015	0.135729	13.5729	4	0	0.0117653	3.21	0	0	2.29	0.1652	1	0.048088	1.09861	1.38629	C39	计算机、通信和其他电子设备制造业	北京市	110000	北京市	110000
970	2016	0.129702	12.9702	3	0	0.0119703	3.11	0	0	2.2872	0.1648	1	0.05742	1.38629	1.79176	C39	计算机、通信和其他电子设备制造业	北京市	110000	北京市	110000
970	2017	0.142465	14.2465	3	0.693147	0.0145486	3.19	0	0	2.31	0.1489	1	0.045509	2.19722	1.60944	C39	计算机、通信和其他电子设备制造业	北京市	110000	北京市	110000
970	2018	0.131333	13.1333	2	0	0.0210826	3.23	0	0	2.38	0.1743	1	0.035131	2.19722	2.48491	C39	计算机、通信和其他电子设备制造业	北京市	110000	北京市	110000
970	2019	0.109562	10.9562	1	0	0.021563	3.63	0	0	2.5	0.1686	1	0.027372	1.38629	1.94591	C39	计算机、通信和其他电子设备制造业	北京市	110000	北京市	110000
970	2020	0.121699	12.1699	2	0.693147	0.0190087	3.8	0	0	2.47	0.1529	1	0.017435	1.38629	1.09861	C39	计算机、通信和其他电子设备制造业	北京市	110000	北京市	110000
970	2021	0.18231	18.231	3	0	0.015263	4.03	0.693147	14.2857	2.38	0.123	1	0.08208	1.38629	2.07944	C39	计算机、通信和其他电子设备制造业	北京市	110000	北京市	110000
970	2022	0.196493	19.6493	3	0.693147	0.0104389	4.87	0.693147	16.6667	2.46	0.1236	1	0.285207	1.60944	1.94591	C39	计算机、通信和其他电子设备制造业	北京市	110000	北京市	110000
970	2023	0.116684	11.6684	5	2.3979	0.0108531	5.16	0	0	2.68	0.1572	0	0.025213	2.3979	1.60944	C39	计算机、通信和其他电子设备制造业	北京市	110000	北京市	110000
976	2011	0.0222281	2.22281	1	0	0.0481357	0	0	0	0	0.4951	0	-0.255897	0	0	C28	化学纤维制造业	广东省	440000	开平市	440783
976	2012	0.0282115	2.82115	1	0	0.0561639	0	0	0	0	0.4855	0	0.024786	0.693147	0	C28	化学纤维制造业	广东省	440000	开平市	440783
976	2013	0.0236398	2.36398	1	0	0.0618625	0	0	0	0	0.5111	0	-0.181171	0	0	C28	化学纤维制造业	广东省	440000	开平市	440783
976	2014	0.0311003	3.11003	1	0	0.0829024	0	0	0	0	0.5207	0	-0.486708	0.693147	0	C28	化学纤维制造业	广东省	440000	开平市	440783
976	2016	0.0188538	1.88538	1	0	0.0257151	6.74	0	0	0	0.0691	0	13.9289	1.09861	0	C28	化学纤维制造业	广东省	440000	开平市	440783
976	2017	0.0945738	9.45738	1	0	0.0112561	17.38	0	0	0	0.035	1	0.145546	1.09861	0	C37	铁路、船舶、航空航天和其它运输设备制造业	广东省	440000	开平市	440783
976	2018	0.0905003	9.05003	1	0	0.0138626	16.28	0	0	0	0.0357	1	0.048094	0.693147	0	C37	铁路、船舶、航空航天和其它运输设备制造业	广东省	440000	开平市	440783
976	2019	0.110061	11.0061	3	0	0.0161067	15.63	0	0	3.01	0.0311	1	0.076145	0	0	C37	铁路、船舶、航空航天和其它运输设备制造业	广东省	440000	开平市	440783
976	2020	0.130406	13.0406	2	1.38629	0.0132209	15.41	0	0	4.57	0.0263	1	0.11436	1.79176	0	C37	铁路、船舶、航空航天和其它运输设备制造业	广东省	440000	开平市	440783
976	2021	0.104164	10.4164	1	1.09861	0.0125634	18.32	0	0	5.81	0.0244	1	0.030979	0	0	C37	铁路、船舶、航空航天和其它运输设备制造业	广东省	440000	开平市	440783
976	2022	0.135859	13.5859	3	1.38629	0.0130891	18.22	0	0	5.84	0.0279	1	-0.409839	0.693147	0	C37	铁路、船舶、航空航天和其它运输设备制造业	广东省	440000	开平市	440783
977	2011	0.254669	25.4669	1	3.93183	0.10439	0	2.3979	5.49451	11.98	0.0935	1	0.073886	0	5.20949	C39	计算机、通信和其他电子设备制造业	山东省	370000	济南市	370100
977	2012	0.261894	26.1894	1	3.97029	0.0793493	0	2.56495	5.40541	14.94	0.0642	1	0.037448	0	5.40717	C39	计算机、通信和其他电子设备制造业	山东省	370000	济南市	370100
977	2013	0.182844	18.2844	1	3.63759	0.0984321	0	2.48491	4	13.9933	0.0394	0	-0.121578	0	5.6204	C39	计算机、通信和其他电子设备制造业	山东省	370000	济南市	370100
977	2014	0.166012	16.6012	1	4.09434	0.0559352	0	1.94591	1.99336	14.2756	0.0264	0	1.19239	0	5.71043	C39	计算机、通信和其他电子设备制造业	山东省	370000	济南市	370100
977	2015	0.24595	24.595	3	4.2485	0.0664779	40.3	2.56495	3.76175	17.55	0.0296	0	0.216861	0	5.76832	C39	计算机、通信和其他电子设备制造业	山东省	370000	济南市	370100
977	2016	0.239637	23.9637	2	4.36945	0.0686691	44.03	2.48491	2.99728	20.41	0.0431	0	0.38995	0	5.90808	C39	计算机、通信和其他电子设备制造业	山东省	370000	济南市	370100
977	2017	0.241904	24.1904	3	4.52179	0.0457304	40.07	2.19722	3.57143	19.45	0.0225	0	0.843436	0.693147	5.4161	C39	计算机、通信和其他电子设备制造业	山东省	370000	济南市	370100
977	2018	0.23454	23.454	4	4.70048	0.0324962	39.03	1.79176	3.47222	21.02	0.0232	0	0.27852	0	4.97673	C39	计算机、通信和其他电子设备制造业	山东省	370000	济南市	370100
977	2019	0.225837	22.5837	4	4.77912	0.0238454	38.97	1.60944	4.93827	18.24	0.0288	0	0.107252	0	4.40672	C39	计算机、通信和其他电子设备制造业	山东省	370000	济南市	370100
977	2020	0.168706	16.8706	5	4.97673	0.0138232	40.12	0	0	18.71	0.0278	0	0.43843	0	2.3979	C39	计算机、通信和其他电子设备制造业	山东省	370000	济南市	370100
977	2021	0.16145	16.145	3	4.99043	0.0086327	40.45	0	0	21.71	0.0212	0	0.049767	0	4.09434	C39	计算机、通信和其他电子设备制造业	山东省	370000	济南市	370100
977	2022	0.253293	25.3293	5	4.85981	0.0092872	42.07	1.79176	2.57732	24.94	0.0296	0	0.131906	0	5.273	C39	计算机、通信和其他电子设备制造业	山东省	370000	济南市	370100
977	2023	0.230291	23.0291	5	4.5326	0.0069958	43.95	1.09861	0.966183	26.53	0.0425	0	0.035197	0	5.33754	C39	计算机、通信和其他电子设备制造业	山东省	370000	济南市	370100
980	2011	0.032099	3.2099	1	0	0.0556461	0	0	0	0	0.3836	0	0.030671	0	1.94591	C40	仪器仪表制造业	安徽省	340000	黄山市	341000
980	2012	0.0286901	2.86901	1	0	0.0539568	0	0	0	0	0.3272	0	0.023462	0	1.79176	C36	汽车制造业	安徽省	340000	黄山市	341000
980	2013	0.0152102	1.52102	1	0	0.0347746	0	0	0	0	0.2101	0	0.619846	0	0.693147	C36	汽车制造业	安徽省	340000	黄山市	341000
980	2014	0.0202964	2.02963	1	0	0.0354719	0	0	0	0	0.1734	0	0.017266	0	1.60944	C36	汽车制造业	安徽省	340000	黄山市	341000
980	2015	0.01743	1.743	1	0	0.0294445	14.54	0	0	0	0.1319	0	0.029612	0	0	C36	汽车制造业	安徽省	340000	黄山市	341000
980	2016	0.0184888	1.84888	1	0	0.0430638	14.2	0	0	0	0.1454	0	0.036697	0	0	C36	汽车制造业	安徽省	340000	黄山市	341000
980	2017	0.129768	12.9768	1	1.38629	0.131934	11.57	0	0	1.8	0.093	1	6.82423	0.693147	2.30259	C36	汽车制造业	安徽省	340000	黄山市	341000
980	2018	0.135868	13.5868	1	2.63906	0.130612	13.21	0	0	2.46	0.1245	1	0.038409	1.38629	0	C36	汽车制造业	安徽省	340000	黄山市	341000
980	2019	0.140471	14.0472	1	2.30259	0.132697	20.67	0	0	3.44	0.1664	1	-0.636629	1.38629	0	C36	汽车制造业	浙江省	330000	永康市	330784
980	2022	0.0677963	6.77963	2	1.38629	0.223015	10.82	0	0	2.76	0.2131	0	-0.29157	1.09861	0	C36	汽车制造业	浙江省	330000	永康市	330784
980	2023	0.0825624	8.25624	2	2.70805	0.248188	6.99	0	0	2.76	0.1943	0	-0.381209	1.38629	0	C36	汽车制造业	浙江省	330000	永康市	330784
981	2018	0.120994	12.0994	1	2.07944	0.0784533	6.66	0	0	8.33	0.1021	1	-0.186792	0	0.693147	C36	汽车制造业	甘肃省	620000	兰州市	620100
981	2022	0.128487	12.8487	1	2.83321	0.186155	6.51	0	0	5.16	0.1475	1	0.376193	0	0	C36	汽车制造业	甘肃省	620000	兰州市	620100
981	2023	0.0520134	5.20134	1	2.56495	0.135444	6.81	0	0	5.16	0.1404	0	-0.434681	0	0	C36	汽车制造业	甘肃省	620000	兰州市	620100
985	2011	0.0374113	3.74113	1	0	0.0355466	0	0	0	0	0.5116	0	0.028426	1.79176	0	C26	化学原料及化学制品制造业	黑龙江省	230000	大庆市	230600
985	2012	0.0276979	2.76979	1	0	0.0312054	0	0	0	0	0.6585	0	-0.033373	0	0	C26	化学原料及化学制品制造业	黑龙江省	230000	大庆市	230600
985	2013	0.0338943	3.38944	1	0	0.0281822	0	0	0	0	0.6952	0	0.047572	0	0.693147	C26	化学原料及化学制品制造业	黑龙江省	230000	大庆市	230600
985	2014	0.287777	28.7777	1	0	0.0256549	0	0.693147	100	0	0.6493	0	0.014176	1.94591	0.693147	C26	化学原料及化学制品制造业	黑龙江省	230000	大庆市	230600
985	2015	0.0469713	4.69713	1	0	0.0247924	10.23	0	0	0	0.6212	0	-0.039474	1.60944	0	C26	化学原料及化学制品制造业	黑龙江省	230000	大庆市	230600
985	2016	0.0422843	4.22843	1	0	0.0261702	10.4	0	0	0	0.6073	0	0.075135	1.09861	0	C26	化学原料及化学制品制造业	黑龙江省	230000	大庆市	230600
985	2017	0.0388338	3.88339	1	0	0.0203133	10.83	0	0	0	0.5201	0	0.068162	1.09861	0	C26	化学原料及化学制品制造业	黑龙江省	230000	大庆市	230600
985	2018	0.0324287	3.24287	1	0	0.0167469	10.75	0	0	0	0.4764	0	-0.049536	0	0.693147	C26	化学原料及化学制品制造业	黑龙江省	230000	大庆市	230600
985	2019	0.0280762	2.80762	1	0	0.0143433	10.9	0	0	0	0.4915	0	0.098589	0	0	C26	化学原料及化学制品制造业	黑龙江省	230000	大庆市	230600
985	2020	0.0378052	3.78052	1	0	0.0139067	11.46	0	0	2.35	0.5112	0	0.000137	0.693147	0	C26	化学原料及化学制品制造业	黑龙江省	230000	大庆市	230600
985	2021	0.0581161	5.81161	2	0	0.0181862	12	0	0	2.09	0.4614	0	0.024369	1.94591	0	C26	化学原料及化学制品制造业	黑龙江省	230000	大庆市	230600
985	2022	0.0620355	6.20355	2	0	0.0162071	12	0	0	4.3	0.408	0	0.018367	1.79176	0.693147	C26	化学原料及化学制品制造业	黑龙江省	230000	大庆市	230600
985	2023	0.0592943	5.92943	2	0	0.0143284	12.37	0	0	0	0.3857	0	-0.028373	1.79176	1.09861	C26	化学原料及化学制品制造业	黑龙江省	230000	大庆市	230600
988	2011	0.0555297	5.55297	1	2.70805	0.0493813	0	0	0	13.12	0.2086	0	0.381893	0	0	C39	计算机、通信和其他电子设备制造业	湖北省	420000	武汉市	420100
988	2012	0.0556544	5.56545	1	2.63906	0.0471873	0	0	0	13.79	0.2149	0	0.030333	0	0	C39	计算机、通信和其他电子设备制造业	湖北省	420000	武汉市	420100
988	2013	0.0690708	6.90708	1	2.99573	0.0545798	0	0	0	15	0.2615	0	0.034309	0.693147	0	C39	计算机、通信和其他电子设备制造业	湖北省	420000	武汉市	420100
988	2014	0.0802331	8.02331	1	3.80666	0.0530956	0	0	0	15.19	0.2295	0	0.062285	1.09861	0	C39	计算机、通信和其他电子设备制造业	湖北省	420000	武汉市	420100
988	2015	0.0935139	9.35139	1	3.80666	0.0535363	21.74	0	0	17.41	0.214	0	0.043603	0	0.693147	C39	计算机、通信和其他电子设备制造业	湖北省	420000	武汉市	420100
988	2016	0.0888308	8.88308	1	3.21888	0.0438326	22.6	0	0	16.6252	0.2055	0	0.080193	0	1.09861	C39	计算机、通信和其他电子设备制造业	湖北省	420000	武汉市	420100
988	2017	0.10228	10.228	2	3.4012	0.0317839	21.99	0	0	14.86	0.14	0	0.634248	1.60944	0	C39	计算机、通信和其他电子设备制造业	湖北省	420000	武汉市	420100
988	2018	0.104018	10.4018	2	3.49651	0.0288468	23.24	0	0	15.08	0.133	0	0.090581	1.60944	0	C39	计算机、通信和其他电子设备制造业	湖北省	420000	武汉市	420100
988	2019	0.116333	11.6333	2	4.14314	0.0293736	24.98	0	0	16.6	0.1506	0	0.077291	1.79176	0	C39	计算机、通信和其他电子设备制造业	湖北省	420000	武汉市	420100
988	2020	0.0930867	9.30867	2	3.04452	0.0262676	24.77	0	0	15.73	0.1352	0	0.070423	0.693147	0	C39	计算机、通信和其他电子设备制造业	湖北省	420000	武汉市	420100
988	2021	0.105904	10.5904	3	2.83321	0.0190315	24.85	0	0	15.65	0.1191	0	0.110374	0.693147	0.693147	C39	计算机、通信和其他电子设备制造业	湖北省	420000	武汉市	420100
988	2022	0.0948042	9.48042	3	2.89037	0.0159456	24.5	0	0	15.7304	0.1047	0	0.112339	0	0	C39	计算机、通信和其他电子设备制造业	湖北省	420000	武汉市	420100
988	2023	0.12239	12.239	5	2.56495	0.0215465	26.6	0	0	16.26	0.1109	0	0.110645	0.693147	0	C39	计算机、通信和其他电子设备制造业	湖北省	420000	武汉市	420100
989	2011	0.099661	9.9661	1	0	0.0779316	0	0	0	1.61	0.1161	1	0.051221	0	2.56495	C27	医药制造业	湖南省	430000	长沙市	430100
989	2012	0.115279	11.5279	1	0	0.0743422	0	0	0	1.09	0.1326	1	0.011604	1.79176	2.63906	C27	医药制造业	湖南省	430000	长沙市	430100
989	2013	0.114325	11.4325	1	0	0.0701683	0	0	0	1.0873	0.1267	1	0.051226	1.09861	3.4012	C27	医药制造业	湖南省	430000	长沙市	430100
989	2014	0.0538118	5.38119	1	0.693147	0.0573601	0	0	0	1.1	0.3609	0	0.043362	0.693147	3.04452	C27	医药制造业	湖南省	430000	长沙市	430100
989	2015	0.120125	12.0125	1	2.83321	0.0694802	12.5	0.693147	6.25	1.87	0.2781	0	1.69728	1.09861	2.83321	C27	医药制造业	湖南省	430000	长沙市	430100
989	2016	0.0846751	8.4675	2	1.60944	0.0602267	8.09	0	0	1.73	0.245	0	0.092274	1.79176	2.77259	C27	医药制造业	湖南省	430000	长沙市	430100
989	2017	0.0719096	7.19096	1	1.79176	0.0543167	7.43	0	0	2.06	0.202	0	0.088349	1.94591	2.3979	C27	医药制造业	湖南省	430000	长沙市	430100
989	2018	0.073949	7.3949	1	2.19722	0.0568951	8.07	0	0	2.34	0.2088	0	-0.042698	1.79176	2.07944	C27	医药制造业	湖南省	430000	长沙市	430100
989	2019	0.0790838	7.90838	1	2.77259	0.0580142	7.23	0	0	2.53	0.2124	0	-0.073974	1.79176	1.94591	C27	医药制造业	湖南省	430000	长沙市	430100
989	2020	0.16563	16.563	2	2.89037	0.0647508	6.9	0	0	2.28	0.2149	1	-0.016623	2.19722	1.94591	C27	医药制造业	湖南省	430000	长沙市	430100
989	2021	0.13477	13.477	1	2.19722	0.0604155	6.8	0	0	2.34	0.1959	1	0.011417	1.94591	0.693147	C27	医药制造业	湖南省	430000	长沙市	430100
989	2022	0.237458	23.7458	1	2.07944	0.0538136	9.63	0.693147	33.3333	3.13	0.229	1	0.002658	2.19722	1.38629	C27	医药制造业	湖南省	430000	长沙市	430100
989	2023	0.123609	12.3609	1	1.38629	0.0503938	11.05	0.693147	14.2857	3.13	0.2142	0	-0.008101	2.30259	2.07944	C27	医药制造业	湖南省	430000	长沙市	430100
990	2011	0.0980556	9.80556	1	0	0.0705235	0	0	0	5.51	0.1985	1	0.01538	1.09861	0	C27	医药制造业	江西省	360000	南昌市	360100
990	2012	0.0975927	9.75927	1	0	0.0833742	0	0	0	4.34	0.2021	1	-0.003484	1.09861	0	C26	化学原料及化学制品制造业	江西省	360000	南昌市	360100
990	2013	0.0945674	9.45674	1	0	0.0712622	0	0	0	4.9455	0.2128	1	0.026122	0.693147	0	C26	化学原料及化学制品制造业	江西省	360000	南昌市	360100
990	2014	0.107805	10.7805	2	0	0.0650279	0	0	0	5.21	0.2638	1	0.383062	0.693147	0	C26	化学原料及化学制品制造业	江西省	360000	南昌市	360100
990	2015	0.0920128	9.20128	1	0	0.0521997	6.48	0	0	4.45	0.2202	1	0.119869	0	0	C26	化学原料及化学制品制造业	江西省	360000	南昌市	360100
990	2016	0.104091	10.4091	1	0	0.0350597	7.99	0	0	4.3845	0.2233	1	4.08845	1.38629	0	C26	化学原料及化学制品制造业	江西省	360000	南昌市	360100
990	2017	0.123091	12.3091	1	1.09861	0.0307196	9.87	0	0	5.22	0.2025	1	0.035288	2.07944	0	C26	化学原料及化学制品制造业	江西省	360000	南昌市	360100
990	2018	0.105916	10.5916	1	0	0.0251875	10.06	0	0	5.5	0.1683	1	0.01602	1.60944	0	C26	化学原料及化学制品制造业	江西省	360000	南昌市	360100
990	2019	0.117618	11.7618	1	0.693147	0.0253659	9.32	0	0	6.34	0.2628	1	0.001312	1.60944	0	C26	化学原料及化学制品制造业	江西省	360000	南昌市	360100
990	2020	0.127146	12.7146	1	1.38629	0.0233902	9.11	0	0	6.55	0.2408	1	0.021558	1.94591	0	C26	化学原料及化学制品制造业	江西省	360000	南昌市	360100
990	2021	0.142523	14.2523	2	1.38629	0.0211332	9.05	0	0	6.98	0.2204	1	0.105727	2.48491	0	C26	化学原料及化学制品制造业	江西省	360000	南昌市	360100
990	2022	0.127568	12.7568	2	0	0.019032	10.12	0	0	7.54	0.2103	1	0.00273	2.3979	0	C26	化学原料及化学制品制造业	江西省	360000	南昌市	360100
990	2023	0.117535	11.7535	1	0	0.0218845	10.11	0	0	8.25	0.1985	1	-0.011451	2.48491	0	C26	化学原料及化学制品制造业	江西省	360000	南昌市	360100
999	2011	0.098989	9.8989	1	0	0.169448	0	0	0	1.69	0.1773	1	0.025146	0	1.38629	C27	医药制造业	广东省	440000	深圳市	440300
999	2012	0.106843	10.6843	1	0	0.165398	0	0	0	2.3	0.2399	1	0.149575	0	2.07944	C27	医药制造业	广东省	440000	深圳市	440300
999	2013	0.11048	11.048	2	0	0.148036	0	0	0	2.45	0.2436	1	0.134559	0	1.09861	C27	医药制造业	广东省	440000	深圳市	440300
999	2014	0.117757	11.7757	1	0	0.147986	0	0	0	2.7317	0.2103	1	0.128928	0	3.85015	C27	医药制造业	广东省	440000	深圳市	440300
999	2015	0.106335	10.6335	1	0	0.144011	2.14	0	0	2.88	0.2258	1	0.097008	0	1.94591	C27	医药制造业	广东省	440000	深圳市	440300
999	2016	0.132099	13.2099	2	0	0.133656	2.13	0	0	3.0141	0.2175	1	0.13646	0	4.09434	C27	医药制造业	广东省	440000	深圳市	440300
999	2017	0.14106	14.106	2	0	0.117967	2.3	0	0	3.2559	0.202	1	0.160907	1.60944	3.58352	C27	医药制造业	广东省	440000	深圳市	440300
999	2018	0.178336	17.8335	4	1.09861	0.102238	2.29	0	0	3.44	0.1803	1	0.103096	2.56495	3.04452	C27	医药制造业	广东省	440000	深圳市	440300
999	2019	0.0963586	9.63586	3	1.38629	0.0900251	2.7	0	0	3.8	0.1602	0	0.153412	2.19722	3.13549	C27	医药制造业	广东省	440000	深圳市	440300
999	2020	0.124924	12.4924	4	2.56495	0.0989538	2.87	0	0	4.37	0.1583	0	0.075002	2.30259	3.46574	C27	医药制造业	广东省	440000	深圳市	440300
999	2021	0.122855	12.2855	4	2.70805	0.094395	2.95	0	0	4.84	0.1524	0	0.117623	1.94591	3.3673	C27	医药制造业	广东省	440000	深圳市	440300
999	2022	0.144342	14.4342	5	2.83321	0.0873603	3.23	0	0	5.04	0.1375	0	0.111506	2.99573	3.43399	C27	医药制造业	广东省	440000	深圳市	440300
999	2023	0.143082	14.3082	5	2.83321	0.0860981	3.83	0	0	5.16	0.1467	0	0.383751	2.3979	3.85015	C27	医药制造业	广东省	440000	深圳市	440300
1207	2021	0.225109	22.5109	2	0	0.0523819	14.77	1.09861	28.5714	0.8	0	1	1.348	2.30259	2.07944	C26	化学原料及化学制品制造业	山东省	370000	青州市	370781
1207	2022	0.146867	14.6867	2	0	0.0618841	16.37	0	0	1.1236	0.2581	1	0.02281	2.48491	2.3979	C26	化学原料及化学制品制造业	山东省	370000	青州市	370781
1207	2023	0.149104	14.9104	2	0.693147	0.0627607	17.61	0	0	1.02	0.2106	1	0.295911	2.63906	1.60944	C26	化学原料及化学制品制造业	山东省	370000	青州市	370781
1208	2021	0.11934	11.934	1	2.07944	0.0195521	11.4	1.09861	1.78571	2.6	0	0	0.585353	1.79176	4.72739	C38	电气机械及器材制造业	湖南省	430000	湘潭市	430300
1208	2022	0.103895	10.3895	1	2.30259	0.0140323	11.35	0.693147	1.14942	3.16	0.0652	0	0.070021	1.09861	4.47734	C38	电气机械及器材制造业	湖南省	430000	湘潭市	430300
1208	2023	0.102745	10.2745	2	2.19722	0.0144296	11.18	0.693147	3.22581	3.89	0.0644	0	0.039982	0	3.46574	C38	电气机械及器材制造业	湖南省	430000	湘潭市	430300
1217	2021	0.267442	26.7442	2	0	0.0230754	12.89	1.79176	35.7143	0.29	0	1	1.46917	2.99573	2.70805	C26	化学原料及化学制品制造业	安徽省	340000	池州市	341700
1217	2022	0.220073	22.0073	2	0	0.0203126	14.24	0.693147	25	0.42	0.2756	1	0.079892	3.43399	1.60944	C26	化学原料及化学制品制造业	安徽省	340000	池州市	341700
1217	2023	0.191402	19.1402	2	0	0.0258878	16	1.79176	27.7778	0.39	0.2208	0	0.061056	2.89037	2.94444	C26	化学原料及化学制品制造业	安徽省	340000	池州市	341700
1218	2021	0.039763	3.9763	2	0	0.0306811	13.97	0	0	2.51	0	0	1.23198	1.60944	0	C26	化学原料及化学制品制造业	湖南省	430000	长沙市	430100
1218	2022	0.0549775	5.49775	2	0	0.0636663	15.54	0	0	2.79	0.2303	0	0.0202	1.94591	0	C26	化学原料及化学制品制造业	湖南省	430000	长沙市	430100
1218	2023	0.0640353	6.40353	2	0.693147	0.0613589	15.78	0	0	2.93	0.209	0	0.037663	2.19722	0	C26	化学原料及化学制品制造业	湖南省	430000	长沙市	430100
1223	2023	0.0494936	4.94936	1	1.60944	0.0298123	6.56	0	0	0	0.1597	0	0.06403	1.09861	1.38629	C35	专用设备制造业	江西省	360000	九江市	360400
1225	2023	0.127558	12.7558	1	0.693147	0.033809	22.36	0	0	0	0.0934	1	0.994291	1.09861	2.56495	C34	通用设备制造业	浙江省	330000	杭州市	330100
1229	2022	0.156467	15.6467	2	3.95124	0.161964	19.16	0	0	2.17	0	1	1.76387	0.693147	0	C39	计算机、通信和其他电子设备制造业	广东省	440000	广州市	440100
1229	2023	0.110302	11.0302	3	4.26268	0.147934	22.18	0	0	2.17	0.0154	0	0.058174	0.693147	1.09861	C39	计算机、通信和其他电子设备制造业	广东省	440000	广州市	440100
1231	2022	0.102857	10.2857	2	0	0.0325054	16.1	0	0	6.51	0	1	1.03099	0	0	C26	化学原料及化学制品制造业	陕西省	610000	西安市	610100
1231	2023	0.293851	29.3851	2	1.09861	0.0310727	8.9	0.693147	100	6.51	0.1229	0	0.031302	0.693147	0.693147	C26	化学原料及化学制品制造业	陕西省	610000	西安市	610100
1238	2022	0.0405698	4.05698	2	1.38629	0.0497947	14.42	0	0	0.75	0	0	0.650062	0	0	C21	家具制造业	浙江省	330000	临海市	331082
1238	2023	0.0615471	6.15471	2	1.09861	0.0535959	12.3	0	0	0.75	0.2314	0	-0.00253	0	2.30259	C21	家具制造业	浙江省	330000	临海市	331082
1255	2022	0.0547915	5.47915	2	0.693147	0.0570415	15.03	0	0	1.91	0	0	1.07356	2.30259	0	C26	化学原料及化学制品制造业	浙江省	330000	海宁市	330481
1255	2023	0.073175	7.3175	2	0	0.112036	16.35	0	0	1.91	0.2558	0	-0.019249	2.19722	1.79176	C26	化学原料及化学制品制造业	浙江省	330000	海宁市	330481
1256	2023	0.0500542	5.00542	1	0.693147	0.0307062	14.91	0	0	0.62	0.196	0	0.064998	0.693147	2.19722	C35	专用设备制造业	浙江省	330000	温州市	330300
1259	2022	0.0385648	3.85648	1	2.99573	0.0072439	7.24	0	0	0.17	0	0	1.0336	0	0	C38	电气机械及器材制造业	北京市	110000	北京市	110000
1259	2023	0.0875099	8.75099	2	3.13549	0.0675376	9.62	0	0	0.17	0.0323	0	0.034705	0	4.18966	C38	电气机械及器材制造业	北京市	110000	北京市	110000
1260	2023	0.0444467	4.44466	2	0	0.0367686	7.13	0	0	0	0.3062	0	0.802902	0	1.94591	C36	汽车制造业	山东省	370000	烟台市	370600
1266	2022	0.109625	10.9625	3	0.693147	0.0148901	0	0	0	1.86	0	1	1.58946	0.693147	0	C40	仪器仪表制造业	上海市	310000	上海市	310000
1266	2023	0.0736772	7.36771	3	1.60944	0.015491	0	0	0	1.86	0.0253	0	-0.028604	0.693147	3.33221	C40	仪器仪表制造业	上海市	310000	上海市	310000
1268	2022	0.100264	10.0264	1	0.693147	0.035231	11.41	0	0	0	0	1	1.11673	1.38629	0	C34	通用设备制造业	广东省	440000	清远市	441800
1268	2023	0.0488851	4.88851	1	0	0.0342966	10.64	0	0	0	0.4354	0	0.054568	1.09861	1.79176	C34	通用设备制造业	广东省	440000	清远市	441800
1270	2023	0.192376	19.2376	3	1.38629	0.0051744	47.6	0.693147	33.3333	3.85	0.0834	0	0.032143	1.09861	1.38629	C39	计算机、通信和其他电子设备制造业	浙江省	330000	杭州市	330100
1278	2023	0.0433218	4.33218	2	0	0.0329251	13.29	0	0	0.46	0.1594	0	0.756807	0.693147	1.09861	C36	汽车制造业	浙江省	330000	慈溪市	330282
1282	2023	0.0603564	6.03564	1	1.09861	0.0292619	12.33	0	0	0.18	0	0	1.24654	1.79176	3.13549	C36	汽车制造业	安徽省	340000	芜湖市	340200
1283	2022	0.128074	12.8074	1	2.94444	0.0330454	17.08	0	0	4.55	0	1	0.952049	0.693147	0	C38	电气机械及器材制造业	广东省	440000	深圳市	440300
1283	2023	0.148574	14.8574	2	2.48491	0.0185293	16.43	1.09861	6.25	4.55	0.3201	0	0.138041	1.09861	3.49651	C38	电气机械及器材制造业	广东省	440000	深圳市	440300
1288	2022	0.0751415	7.51415	1	1.79176	0.0149702	8.76	0	0	0	0.0566	0	0.040429	2.77259	3.17805	C34	通用设备制造业	四川省	510000	自贡市	510300
1288	2023	0.0742289	7.42289	1	1.79176	0.0153066	9.74	0	0	0	0.0533	0	0.126721	3.04452	2.63906	C34	通用设备制造业	四川省	510000	自贡市	510300
1308	2022	0.159365	15.9365	3	3.2581	0.0051301	23.01	0	0	0	0	1	1.20584	1.60944	0	C39	计算机、通信和其他电子设备制造业	广东省	440000	深圳市	440300
1308	2023	0.163494	16.3494	3	3.3673	0.0037577	21.06	1.09861	5.71429	1.37	0.0607	0	0.171607	1.79176	3.58352	C39	计算机、通信和其他电子设备制造业	广东省	440000	深圳市	440300
1309	2022	0.154659	15.4659	3	2.19722	0.0033587	28	0	0	4.6	0	1	0.97168	1.38629	0	C39	计算机、通信和其他电子设备制造业	广东省	440000	深圳市	440300
1309	2023	0.281471	28.1471	3	2.3979	0.0015016	29.18	1.94591	21.4286	6.76	0.0132	1	0.027936	0.693147	3.3673	C39	计算机、通信和其他电子设备制造业	广东省	440000	深圳市	440300
1311	2023	0.0544094	5.44094	2	0.693147	0.0416899	11.95	0	0	0	0.2742	0	1.29986	0.693147	1.09861	C36	汽车制造业	安徽省	340000	滁州市	341100
1314	2023	0.158212	15.8212	3	3.3673	0.0161909	44.85	0.693147	7.14286	4.18	0.1498	0	1.26887	0	2.70805	C39	计算机、通信和其他电子设备制造业	广东省	440000	深圳市	440300
1319	2022	0.10167	10.167	1	1.94591	0.0388776	10.51	0	0	0	0	1	0.768613	0	0	C36	汽车制造业	广东省	440000	东莞市	441900
1319	2023	0.0631921	6.31921	1	2.07944	0.0358729	12.58	0	0	0	0.2206	0	0.055934	0.693147	2.07944	C36	汽车制造业	广东省	440000	东莞市	441900
1323	2022	0.0493667	4.93667	1	3.66356	0.0592771	7.2	0	0	0.7	0	0	0.698393	0	0	C21	家具制造业	广东省	440000	东莞市	441900
1323	2023	0.130537	13.0537	4	3.33221	0.0445947	8.24	0	0	0.7	0.286	0	0.063964	0	5.6058	C21	家具制造业	广东省	440000	东莞市	441900
1324	2023	0.147567	14.7567	1	0.693147	0.0178044	11.92	1.09861	33.3333	0	0	0	1.29269	1.38629	1.94591	C37	铁路、船舶、航空航天和其它运输设备制造业	江苏省	320000	常州市	320400
1328	2023	0.0830353	8.30353	2	2.83321	0.0086596	10.43	0	0	0	0	0	1.5914	1.09861	3.29584	C26	化学原料及化学制品制造业	重庆市	500000	重庆市	500000
1332	2023	0.0720944	7.20944	3	0	0.032913	11.51	0	0	1.67	0.0868	0	0.041094	1.79176	2.63906	C35	专用设备制造业	江苏省	320000	无锡市	320200
1333	2023	0.0706925	7.06926	2	1.09861	0.0153474	14.97	0	0	0.94	0.1547	0	0.026794	2.19722	1.38629	C26	化学原料及化学制品制造业	浙江省	330000	海宁市	330481
1336	2022	0.0603641	6.03641	1	1.09861	0.0156935	28.06	0	0	3.07	0	0	1.49841	2.77259	0	C35	专用设备制造业	浙江省	330000	杭州市	330100
1336	2023	0.20887	20.887	1	0	0.0145718	25.82	1.38629	50	3.07	0.0339	0	0.037927	2.48491	1.94591	C35	专用设备制造业	浙江省	330000	杭州市	330100
1339	2022	0.0999688	9.99688	3	4.06044	0.0128879	28.38	0	0	0	0	0	1.39255	1.38629	0	C39	计算机、通信和其他电子设备制造业	广东省	440000	深圳市	440300
1339	2023	0.196755	19.6755	5	4.2485	0.0130385	24	1.09861	4.16667	0	0.1795	0	0.039177	1.38629	3.89182	C39	计算机、通信和其他电子设备制造业	广东省	440000	深圳市	440300
1360	2023	0.0728591	7.28591	2	0.693147	0.0223568	15.41	0	0	5.15	0	0	1.47517	1.60944	3.09104	C35	专用设备制造业	江西省	360000	南昌市	360100
1367	2023	0.0341461	3.41461	1	0	0.0147494	12.58	0	0	3.46	0	0	1.66364	1.79176	0.693147	C27	医药制造业	浙江省	330000	东阳市	330783
1373	2023	0.0555404	5.55404	2	1.79176	0.0084154	14.32	0	0	0	0	0	1.02596	0	1.94591	C39	计算机、通信和其他电子设备制造业	江苏省	320000	南京市	320100
1380	2023	0.0433754	4.33754	1	0	0.0395411	13.01	0	0	0.95	0	0	1.66197	1.38629	2.63906	C34	通用设备制造业	浙江省	330000	诸暨市	330681
1696	2011	0.0066155	1.22037	1	0	0.0362461	0	0	0	0	0.1151	0	-0.046694	0	0	C37	铁路、船舶、航空航天和其它运输设备制造业	重庆市	500000	重庆市	500000
1696	2012	0.0081461	1.22037	1	0	0.0459329	0	0	0	0.26	0.1321	0	0.458328	0	0	C37	铁路、船舶、航空航天和其它运输设备制造业	重庆市	500000	重庆市	500000
1696	2013	0.0086449	1.22037	1	0	0.0431249	0	0	0	1.274	0.1197	0	0.107183	0	0	C37	铁路、船舶、航空航天和其它运输设备制造业	重庆市	500000	重庆市	500000
1696	2014	0.0244403	2.44402	1	1.09861	0.0372959	0	0	0	1.24	0.1011	0	0.118428	0	0.693147	C37	铁路、船舶、航空航天和其它运输设备制造业	重庆市	500000	重庆市	500000
1696	2015	0.0456346	4.56346	1	0.693147	0.0320803	7.5	0	0	0.45	0.1082	0	0.111612	0	3.66356	C37	铁路、船舶、航空航天和其它运输设备制造业	重庆市	500000	重庆市	500000
1696	2016	0.102293	10.2293	1	0	0.032168	7.36	0	0	0.82	0.1262	1	-0.016177	0.693147	1.79176	C37	铁路、船舶、航空航天和其它运输设备制造业	重庆市	500000	重庆市	500000
1696	2017	0.113177	11.3177	1	0	0.0234055	9.51	0	0	1.13	0.096	1	0.037534	1.94591	1.79176	C37	铁路、船舶、航空航天和其它运输设备制造业	重庆市	500000	重庆市	500000
1696	2018	0.113977	11.3977	1	0	0.0230821	9.2	0	0	1.19	0.0929	1	0.088276	1.94591	1.94591	C37	铁路、船舶、航空航天和其它运输设备制造业	重庆市	500000	重庆市	500000
1696	2019	0.044404	4.4404	1	0	0.0213336	9.28	0	0	1.05	0.0948	0	0.037811	2.07944	1.94591	C37	铁路、船舶、航空航天和其它运输设备制造业	重庆市	500000	重庆市	500000
1696	2020	0.0540624	5.40624	1	1.09861	0.0176756	7.43	0	0	0.76	0.0837	0	0.054778	2.07944	1.94591	C37	铁路、船舶、航空航天和其它运输设备制造业	重庆市	500000	重庆市	500000
1696	2021	0.0848815	8.48815	3	1.60944	0.0290188	8.79	0	0	0.92	0.0899	0	-0.006567	1.94591	2.19722	C37	铁路、船舶、航空航天和其它运输设备制造业	重庆市	500000	重庆市	500000
1696	2022	0.0847052	8.47052	3	1.79176	0.0307135	10.24	0	0	0.91	0.108	0	0.02697	1.38629	2.30259	C37	铁路、船舶、航空航天和其它运输设备制造业	重庆市	500000	重庆市	500000
1696	2023	0.0863825	8.63825	3	2.19722	0.0319072	12.11	0	0	1.41	0.1048	0	0.024363	1.60944	1.38629	C37	铁路、船舶、航空航天和其它运输设备制造业	重庆市	500000	重庆市	500000
2001	2011	0.137373	13.7373	4	0	0.0378212	0	0	0	0	0.2326	1	0.163253	1.38629	1.38629	C27	医药制造业	浙江省	330000	绍兴市	330600
2001	2012	0.147622	14.7622	4	0	0.0494993	0	0	0	1.77	0.2596	1	0.07402	1.38629	2.30259	C27	医药制造业	浙江省	330000	绍兴市	330600
2001	2013	0.137373	13.7373	4	0	0.0414457	0	0	0	1.8199	0.2843	1	0.085625	0.693147	1.60944	C27	医药制造业	浙江省	330000	绍兴市	330600
2001	2014	0.139285	13.9285	4	0	0.0445693	0	0	0	3.06	0.297	1	0.067667	1.09861	1.09861	C27	医药制造业	浙江省	330000	绍兴市	330600
2001	2015	0.15588	15.588	4	0	0.0482282	14.87	0	0	4.36	0.2768	1	0.005433	1.09861	1.79176	C27	医药制造业	浙江省	330000	绍兴市	330600
2001	2016	0.152626	15.2626	4	0	0.0429039	16.13	0	0	5.3984	0.2735	1	0.147026	1.09861	1.09861	C27	医药制造业	浙江省	330000	绍兴市	330600
2001	2017	0.0738449	7.3845	3	0	0.0344816	15.69	0	0	6.75	0.2556	0	0.729988	1.79176	0.693147	C27	医药制造业	浙江省	330000	绍兴市	330600
2001	2018	0.10192	10.192	5	0	0.0566547	18.4	0	0	6.6621	0.2439	0	0.158537	1.79176	1.09861	C27	医药制造业	浙江省	330000	绍兴市	330600
2001	2019	0.102826	10.2826	5	0	0.0461174	17.99	0	0	8.11	0.2726	0	0.042281	1.09861	1.79176	C27	医药制造业	浙江省	330000	绍兴市	330600
2001	2020	0.107914	10.7914	5	0	0.0455406	19.43	0	0	8.08	0.4503	0	0.137161	1.09861	1.38629	C27	医药制造业	浙江省	330000	绍兴市	330600
2001	2021	0.0694243	6.94243	1	0	0.0438638	21.92	0	0	8.5	0.4127	0	0.126773	1.79176	1.38629	C27	医药制造业	浙江省	330000	绍兴市	330600
2001	2022	0.0834636	8.34636	1	0.693147	0.0454302	22.81	0	0	9.4	0.4318	0	0.080682	1.79176	1.94591	C27	医药制造业	浙江省	330000	绍兴市	330600
2001	2023	0.089908	8.9908	1	1.09861	0.061486	23.85	0	0	10.63	0.5583	0	0.053146	1.79176	1.09861	C27	医药制造业	浙江省	330000	绍兴市	330600
2002	2013	0.0182602	1.82602	1	0	0.0216833	0	0	0	0	0.2817	0	0.791534	0.693147	0	C26	化学原料及化学制品制造业	江苏省	320000	扬州市	321000
2002	2014	0.0215509	2.15509	1	0	0.0158532	0	0	0	0	0.3743	0	0.143146	0.693147	0	C26	化学原料及化学制品制造业	江苏省	320000	扬州市	321000
2002	2015	0.0528383	5.28383	1	1.60944	0.0235288	2.77	0	0	0	0.3361	0	0.480173	2.19722	0	C26	化学原料及化学制品制造业	江苏省	320000	扬州市	321000
2002	2016	0.085232	8.5232	2	2.99573	0.0214032	2.84	0	0	0	0.5789	0	-0.129556	1.79176	0	C26	化学原料及化学制品制造业	江苏省	320000	扬州市	321000
2002	2017	0.113236	11.3235	3	3.04452	0.0249223	7.33	0	0	0	0.5241	0	0.511054	2.19722	1.60944	C26	化学原料及化学制品制造业	江苏省	320000	扬州市	321000
2002	2018	0.0944069	9.44069	2	3.13549	0.0302934	7.7	0	0	0	0.5398	0	0.051352	2.3979	0	C26	化学原料及化学制品制造业	江苏省	320000	扬州市	321000
2002	2019	0.0912025	9.12026	2	3.29584	0.0245233	9.22	0	0	0	0.4375	0	0.19213	2.19722	0	C26	化学原料及化学制品制造业	江苏省	320000	扬州市	321000
2002	2020	0.109384	10.9384	3	3.09104	0.0231533	10.52	0	0	0	0.5525	0	0.025714	2.63906	0	C26	化学原料及化学制品制造业	江苏省	320000	扬州市	321000
2002	2021	0.0958941	9.58941	2	2.77259	0.0223966	10.8	0	0	0	0.5381	0	0.334773	2.83321	0	C26	化学原料及化学制品制造业	江苏省	320000	扬州市	321000
2003	2011	0.0495373	4.95373	3	0	0.0709652	0	0	0	0	0.3323	0	0.42056	0	1.38629	C41	其他制造业	浙江省	330000	临海市	331082
2004	2011	0.0990074	9.90074	1	0.693147	0.0563028	0	0	0	0	0.1568	1	1.4966	0	1.60944	C27	医药制造业	重庆市	500000	重庆市	500000
2004	2012	0.0996269	9.96269	1	0	0.0667226	0	0	0	3.46	0.1654	1	0.143454	0	2.07944	C27	医药制造业	重庆市	500000	重庆市	500000
2004	2013	0.0882579	8.82579	1	0	0.0534504	0	0	0	3.2905	0.1506	1	0.356936	0	0.693147	C26	化学原料及化学制品制造业	重庆市	500000	重庆市	500000
2004	2014	0.103661	10.3661	2	0	0.0414054	0	0	0	3.48	0.155	1	0.440331	1.09861	0	C26	化学原料及化学制品制造业	重庆市	500000	重庆市	500000
2004	2015	0.104199	10.4199	1	0.693147	0.0596524	10.81	0	0	3.74	0.1175	1	0.837295	0.693147	0	C26	化学原料及化学制品制造业	重庆市	500000	重庆市	500000
2004	2016	0.111984	11.1984	1	1.09861	0.0521202	11.27	0	0	4.2612	0.1033	1	0.028225	1.09861	0	C26	化学原料及化学制品制造业	重庆市	500000	重庆市	500000
2004	2017	0.130185	13.0185	1	1.79176	0.0493373	9.72	0	0	2.65	0.1533	1	0.242184	2.48491	0	C26	化学原料及化学制品制造业	重庆市	500000	重庆市	500000
2004	2018	0.133621	13.3621	1	1.94591	0.0555863	9.63	0	0	3.42	0.1873	1	-0.056667	2.3979	0	C26	化学原料及化学制品制造业	重庆市	500000	重庆市	500000
2004	2019	0.147593	14.7593	2	1.60944	0.0547615	9.3	0	0	3.92	0.202	1	0.038732	3.04452	0	C26	化学原料及化学制品制造业	重庆市	500000	重庆市	500000
2004	2020	0.163615	16.3615	3	1.94591	0.0581925	9.2	0	0	3.93	0.216	1	0.067424	3.09104	0	C26	化学原料及化学制品制造业	重庆市	500000	重庆市	500000
2004	2021	0.155834	15.5834	2	2.30259	0.0573759	9.71	0	0	3.33	0.2055	1	0.11934	3.13549	0	C26	化学原料及化学制品制造业	重庆市	500000	重庆市	500000
2004	2022	0.160042	16.0042	2	1.60944	0.057712	10.08	0	0	3.41	0.2346	1	0.046261	2.99573	1.60944	C26	化学原料及化学制品制造业	重庆市	500000	重庆市	500000
2004	2023	0.0816058	8.16058	2	1.94591	0.0520344	10.72	0	0	3.41	0.2515	0	0.002015	2.89037	0	C26	化学原料及化学制品制造业	重庆市	500000	重庆市	500000
2005	2011	0.192968	19.2968	3	0	0.0546599	0	1.09861	8	0.7	0.1806	1	0.131122	1.94591	3.2581	C38	电气机械及器材制造业	广东省	440000	珠海市	440400
2005	2012	0.203185	20.3185	4	0	0.0381204	0	1.09861	5.55556	0.95	0.2427	1	0.551983	1.94591	3.61092	C38	电气机械及器材制造业	广东省	440000	珠海市	440400
2005	2013	0.178873	17.8873	4	1.60944	0.0442309	0	0	0	1.0046	0.3141	1	0.010713	1.79176	3.61092	C38	电气机械及器材制造业	广东省	440000	珠海市	440400
2005	2014	0.21444	21.444	4	1.09861	0.052485	0	1.09861	2.85714	0.97	0.3088	1	0.383491	1.60944	4.26268	C38	电气机械及器材制造业	广东省	440000	珠海市	440400
2005	2015	0.233926	23.3926	4	1.94591	0.0580219	7.71	1.38629	6.81818	0.84	0.2729	1	0.017572	0.693147	3.80666	C38	电气机械及器材制造业	广东省	440000	珠海市	440400
2005	2016	0.203344	20.3344	3	2.19722	0.0749048	7.52	0.693147	5.55556	0.83	0.2742	1	-0.028102	1.38629	2.94444	C38	电气机械及器材制造业	广东省	440000	珠海市	440400
2005	2017	0.161598	16.1598	2	2.30259	0.0778792	7.52	0	0	0.81	0.2541	1	0.107603	0.693147	3.93183	C38	电气机械及器材制造业	广东省	440000	珠海市	440400
2005	2018	0.207364	20.7364	2	1.94591	0.09803	7.63	0.693147	11.1111	0.81	0.3829	1	-0.099783	1.94591	2.30259	C38	电气机械及器材制造业	广东省	440000	珠海市	440400
2006	2011	0.122749	12.2749	2	0	0.0195105	0	0	0	0	0.198	1	2.05885	1.60944	2.56495	C35	专用设备制造业	浙江省	330000	绍兴市	330600
2006	2012	0.0751036	7.51036	4	0.693147	0.0232009	0	0	0	0	0.2405	0	-0.184893	0.693147	2.3979	C35	专用设备制造业	浙江省	330000	绍兴市	330600
2006	2013	0.0888955	8.88955	5	0.693147	0.0251173	0	0	0	0	0.2341	0	-0.197828	0.693147	2.77259	C35	专用设备制造业	浙江省	330000	绍兴市	330600
2006	2015	0.156957	15.6957	4	1.09861	0.0244584	13	0	0	0	0.1732	1	0.02909	0.693147	2.3979	C35	专用设备制造业	浙江省	330000	绍兴市	330600
2006	2016	0.151165	15.1165	3	1.09861	0.0232699	11.43	0	0	0	0.1561	1	0.07168	0.693147	3.43399	C35	专用设备制造业	浙江省	330000	绍兴市	330600
2006	2017	0.177117	17.7117	4	2.19722	0.0253002	13.31	0	0	0	0.1355	1	0.092833	1.38629	2.89037	C35	专用设备制造业	浙江省	330000	绍兴市	330600
2006	2018	0.186201	18.6201	5	1.60944	0.0224854	13.94	0	0	0	0.1973	1	0.008839	1.60944	2.83321	C35	专用设备制造业	浙江省	330000	绍兴市	330600
2006	2019	0.232302	23.2302	5	2.56495	0.0241744	13.81	0.693147	4.7619	0	0.2469	1	-0.114762	1.79176	3.09104	C35	专用设备制造业	浙江省	330000	绍兴市	330600
2006	2020	0.200049	20.0049	5	2.56495	0.01891	13.78	0	0	0	0.1957	1	0.052843	1.38629	3.63759	C35	专用设备制造业	浙江省	330000	绍兴市	330600
2006	2021	0.139044	13.9044	1	2.07944	0.0146315	13.15	0	0	0	0.1422	1	0.112602	0.693147	3.3673	C35	专用设备制造业	浙江省	330000	绍兴市	330600
2006	2022	0.17581	17.581	1	2.48491	0.0138547	14.66	0.693147	2.04082	0	0.1317	1	0.283431	1.09861	3.91202	C35	专用设备制造业	浙江省	330000	绍兴市	330600
2006	2023	0.0980342	9.80342	1	1.38629	0.0136674	16.97	0.693147	6.25	0	0.1712	0	-0.041128	1.09861	2.83321	C35	专用设备制造业	浙江省	330000	绍兴市	330600
2007	2011	0.098963	9.8963	2	0	0.0334712	0	0	0	3.96	0.271	1	0.072811	0	0	C27	医药制造业	河南省	410000	新乡市	410700
2007	2012	0.105968	10.5968	2	0	0.0301723	0	0	0	5.22	0.2674	1	0.09682	0.693147	0	C27	医药制造业	河南省	410000	新乡市	410700
2007	2013	0.109885	10.9885	3	0	0.0372891	0	0	0	5.1651	0.2215	1	0.169535	0	0	C27	医药制造业	河南省	410000	新乡市	410700
2007	2014	0.0992594	9.92594	2	0	0.0547619	0	0	0	5.42	0.2054	1	0.098217	0	0	C27	医药制造业	河南省	410000	新乡市	410700
2007	2015	0.111881	11.1881	2	0	0.0496957	17.03	0	0	4.69	0.241	1	0.06833	0	0	C27	医药制造业	河南省	410000	新乡市	410700
2007	2016	0.110857	11.0857	2	0	0.0453398	17.93	0	0	4.1909	0.2191	1	0.141857	0	0	C27	医药制造业	河南省	410000	新乡市	410700
2007	2017	0.108492	10.8492	2	0	0.0399917	17.22	0	0	4.05	0.1839	1	0.091685	0	0	C27	医药制造业	河南省	410000	新乡市	410700
2007	2018	0.111822	11.1822	2	0	0.0319216	24.39	0	0	3.73	0.1573	1	0.192172	0	0	C27	医药制造业	河南省	410000	新乡市	410700
2007	2019	0.112913	11.2913	2	0	0.0265731	26.81	0	0	3.27	0.1615	1	0.192523	0	0	C27	医药制造业	河南省	410000	新乡市	410700
2007	2020	0.0478482	4.78482	3	0	0.0194492	22.83	0	0	1.91	0.1382	0	0.176711	0	0	C27	医药制造业	河南省	410000	新乡市	410700
2007	2021	0.115272	11.5272	2	0	0.0177276	23.95	0.693147	14.2857	2.39	0.191	0	0.118961	1.09861	2.07944	C27	医药制造业	河南省	410000	新乡市	410700
2007	2022	0.176295	17.6295	2	0	0.0210299	21.95	0.693147	9.09091	2.19	0.14	1	0.347145	1.38629	2.48491	C27	医药制造业	河南省	410000	新乡市	410700
2007	2023	0.0615786	6.15787	2	0	0.019851	20.71	0	0	2.24	0.1276	0	0.099152	1.38629	2.07944	C27	医药制造业	河南省	410000	新乡市	410700
2008	2011	0.168573	16.8573	3	0.693147	0.0297497	0	0.693147	1	2.88	0.2034	1	0.169526	0	4.61512	C35	专用设备制造业	广东省	440000	深圳市	440300
2008	2012	0.151668	15.1668	3	0.693147	0.0301395	0	0	0	4.14	0.184	1	0.156063	0.693147	4.41884	C35	专用设备制造业	广东省	440000	深圳市	440300
2008	2013	0.151998	15.1998	3	0.693147	0.0283829	0	0	0	4.2817	0.1909	1	0.050827	0.693147	4.41884	C35	专用设备制造业	广东省	440000	深圳市	440300
2008	2014	0.152355	15.2355	2	0	0.0262419	0	0.693147	0.8	5.29	0.1762	1	0.112766	0	4.83628	C35	专用设备制造业	广东省	440000	深圳市	440300
2008	2015	0.170642	17.0642	2	1.09861	0.0254745	27.74	0	0	5.37	0.1722	1	0.137031	0.693147	5.1299	C35	专用设备制造业	广东省	440000	深圳市	440300
2008	2016	0.172697	17.2697	2	0.693147	0.0784595	30.86	0	0	5.79	0.1488	1	0.129545	0.693147	5.36129	C35	专用设备制造业	广东省	440000	深圳市	440300
2008	2017	0.186283	18.6283	2	0.693147	0.0533052	31.82	0.693147	0.367647	5.58	0.0972	1	0.312797	0	5.60947	C35	专用设备制造业	广东省	440000	深圳市	440300
2008	2018	0.210739	21.0739	1	1.79176	0.0612862	34.64	1.09861	0.41841	5.97	0.0761	1	0.18019	0.693147	6.1717	C35	专用设备制造业	广东省	440000	深圳市	440300
2008	2019	0.240979	24.0979	3	1.60944	0.0647676	34.84	1.60944	0.766284	5.11	0.0801	1	0.056067	0	6.25958	C35	专用设备制造业	广东省	440000	深圳市	440300
2008	2020	0.265665	26.5665	3	2.30259	0.0519991	34.04	2.19722	1.12202	4.42	0.0635	1	0.112462	0	6.57088	C35	专用设备制造业	广东省	440000	深圳市	440300
2008	2021	0.275466	27.5466	3	2.19722	0.0427733	34.06	2.30259	1.25698	4.06	0.1301	1	0.193817	0.693147	6.57508	C35	专用设备制造业	广东省	440000	深圳市	440300
2008	2022	0.244729	24.4729	3	2.70805	0.0409689	35.6	1.38629	0.564972	3.47	0.1099	1	0.278648	0	6.27664	C35	专用设备制造业	广东省	440000	深圳市	440300
2008	2023	0.137099	13.7099	4	2.56495	0.049332	38.53	0	0	2.93	0.1154	0	0.055951	0	5.16479	C35	专用设备制造业	广东省	440000	深圳市	440300
2009	2011	0.139537	13.9537	1	1.60944	0.0623929	0	0	0	1.35	0.2088	1	0.006828	0.693147	4.5326	C35	专用设备制造业	江苏省	320000	无锡市	320200
2009	2012	0.148115	14.8115	1	2.19722	0.0671122	0	0	0	1.84	0.2051	1	0.029585	1.38629	3.91202	C34	通用设备制造业	江苏省	320000	无锡市	320200
2009	2013	0.176536	17.6535	1	1.38629	0.0538474	0	1.09861	3.0303	1.3111	0.162	1	1.00388	1.38629	4.20469	C34	通用设备制造业	江苏省	320000	无锡市	320200
2009	2014	0.173438	17.3438	1	2.19722	0.0574685	0	0.693147	1.31579	1.81	0.1579	1	0.061667	1.60944	4.3438	C34	通用设备制造业	江苏省	320000	无锡市	320200
2009	2015	0.202117	20.2117	1	2.07944	0.075665	13.67	1.09861	2.5974	1.52	0.2072	1	0.102204	1.94591	4.35671	C34	通用设备制造业	江苏省	320000	无锡市	320200
2009	2016	0.167361	16.7361	1	2.48491	0.0769415	9.54	0	0	1.75	0.2065	1	0.081969	1.60944	4.86754	C34	通用设备制造业	江苏省	320000	无锡市	320200
2009	2017	0.209484	20.9484	3	2.3979	0.0659413	12.48	0.693147	0.909091	2.17	0.1495	1	0.026459	1.60944	4.70953	C34	通用设备制造业	江苏省	320000	无锡市	320200
2009	2018	0.174449	17.4449	3	1.79176	0.0738752	11.24	0	0	1.83	0.1341	1	0.127363	1.09861	4.60517	C34	通用设备制造业	江苏省	320000	无锡市	320200
2009	2019	0.19078	19.078	4	2.19722	0.0602218	13.03	0	0	1.83	0.127	1	-0.162941	1.38629	4.31749	C34	通用设备制造业	江苏省	320000	无锡市	320200
2009	2020	0.200786	20.0786	4	2.77259	0.056996	13.76	0	0	1.87	0.1242	1	-0.005685	1.79176	4.31749	C34	通用设备制造业	江苏省	320000	无锡市	320200
2009	2021	0.184478	18.4478	1	2.30259	0.0572996	13.53	0.693147	1.81818	1.79	0.1176	1	0.055133	1.94591	4.02535	C34	通用设备制造业	江苏省	320000	无锡市	320200
2009	2022	0.183734	18.3734	1	2.19722	0.0440057	12.18	0.693147	1.81818	1.97	0.1124	1	0.047056	2.19722	4.02535	C34	通用设备制造业	江苏省	320000	无锡市	320200
2009	2023	0.107967	10.7967	1	1.79176	0.037642	12.77	0.693147	3.125	1.97	0.1683	0	-0.051212	1.94591	3.49651	C34	通用设备制造业	江苏省	320000	无锡市	320200
2010	2011	0.147444	14.7444	4	0	0.0807428	0	0	0	6.16	0.1448	1	0.103618	1.09861	2.30259	C26	化学原料及化学制品制造业	浙江省	330000	杭州市	330100
2010	2012	0.129136	12.9136	4	0	0.0775268	0	0	0	5.26	0.1131	1	0.138758	0	1.38629	C26	化学原料及化学制品制造业	浙江省	330000	杭州市	330100
2010	2013	0.0388961	3.88961	3	0	0.0633297	0	0	0	3.5947	0.2191	0	0.093869	0	0	C26	化学原料及化学制品制造业	浙江省	330000	杭州市	330100
2010	2014	0.0633543	6.33543	3	1.09861	0.0635935	0	0	0	4.78	0.1783	0	-0.015167	0	1.79176	C26	化学原料及化学制品制造业	浙江省	330000	杭州市	330100
2010	2015	0.150429	15.0429	3	2.63906	0.0721374	16.59	0	0	4.33	0.0619	1	2.93046	0	0.693147	C26	化学原料及化学制品制造业	浙江省	330000	杭州市	330100
2010	2016	0.174698	17.4698	3	3.52636	0.135432	17.66	0	0	4.9686	0.0824	1	0.056236	0.693147	1.09861	C26	化学原料及化学制品制造业	浙江省	330000	杭州市	330100
2010	2017	0.185741	18.5741	5	3.78419	0.0448406	17.19	0	0	4.52	0.0694	1	0.061147	0.693147	0	C26	化学原料及化学制品制造业	浙江省	330000	杭州市	330100
2011	2011	0.0849522	8.49522	1	0	0.0777798	0	0.693147	5.55556	2.14	0.0991	0	0.566905	2.48491	2.94444	C34	通用设备制造业	浙江省	330000	诸暨市	330681
2011	2012	0.0762965	7.62965	3	0	0.231461	0	0	0	1.96	0.1373	0	0.127723	1.60944	2.70805	C34	通用设备制造业	浙江省	330000	诸暨市	330681
2011	2013	0.136462	13.6463	3	0	0.233425	0	1.09861	10	1.6546	0.1252	0	-0.017777	2.19722	3.04452	C34	通用设备制造业	浙江省	330000	诸暨市	330681
2011	2014	0.116333	11.6333	2	0	0.329935	0	0.693147	9.09091	1.6855	0.1453	0	0.032249	2.48491	2.48491	C34	通用设备制造业	浙江省	330000	诸暨市	330681
2011	2015	0.140579	14.0579	3	0.693147	0.364445	5.44	0.693147	10	2.1	0.1481	0	0.056594	2.19722	2.3979	C34	通用设备制造业	浙江省	330000	诸暨市	330681
2011	2016	0.148355	14.8355	2	1.09861	0.333784	5.57	0.693147	20	2.2539	0.1346	0	0.213064	2.07944	1.79176	C34	通用设备制造业	浙江省	330000	诸暨市	330681
2011	2017	0.156262	15.6262	3	0	0.292758	5.27	1.09861	20	2.13	0.1181	0	-0.01767	1.60944	2.3979	C34	通用设备制造业	浙江省	330000	诸暨市	330681
2011	2018	0.0956573	9.56573	4	0	0.277582	5.71	0	0	2.12	0.1533	0	-0.522536	1.79176	2.56495	C34	通用设备制造业	浙江省	330000	诸暨市	330681
2011	2019	0.147306	14.7306	4	0.693147	0.123339	5.03	1.09861	9.09091	0.8	0.1353	0	0.040984	1.79176	3.13549	C34	通用设备制造业	浙江省	330000	诸暨市	330681
2011	2020	0.143631	14.3631	4	0.693147	0.0246097	4.9	1.09861	10	1.03	0.113	0	-0.422485	1.94591	3.04452	C34	通用设备制造业	浙江省	330000	诸暨市	330681
2011	2021	0.0959768	9.59768	1	1.38629	0.0242387	4.7	0.693147	0.680272	0.92	0.1122	0	0.281763	1.60944	4.99721	C34	通用设备制造业	浙江省	330000	诸暨市	330681
2011	2022	0.183691	18.3691	1	1.09861	0.0223474	5.81	1.38629	1.57895	1.09	0.1123	1	1.16568	1.09861	5.25227	C34	通用设备制造业	浙江省	330000	诸暨市	330681
2011	2023	0.119918	11.9918	1	1.09861	0.0162245	5.75	1.60944	4.25532	1.07	0	0	0.237484	1.60944	4.55388	C34	通用设备制造业	浙江省	330000	诸暨市	330681
2013	2021	0.061297	6.1297	1	1.38629	0.0319894	13.36	0	0	6.1	0.1668	0	0.076886	2.48491	0	C37	铁路、船舶、航空航天和其它运输设备制造业	湖北省	420000	襄阳市	420600
2017	2011	0.138815	13.8815	1	3.89182	0.0038494	0	0	0	1.84	0.2213	1	-0.048926	0	2.07944	C41	其他制造业	广东省	440000	珠海市	440400
2017	2012	0.171438	17.1438	1	3.43399	0.0032377	0	0.693147	5.88235	1.75	0.2003	1	0.056986	0	2.89037	C39	计算机、通信和其他电子设备制造业	广东省	440000	珠海市	440400
2017	2013	0.194955	19.4955	1	3.71357	0.0033513	0	1.09861	3.84615	2.2022	0.18	1	0.043041	0.693147	3.97029	C39	计算机、通信和其他电子设备制造业	广东省	440000	珠海市	440400
2017	2014	0.193232	19.3232	1	3.55535	0.0031185	0	1.09861	10	2.12	0.1566	1	0.061799	0	3.04452	C39	计算机、通信和其他电子设备制造业	广东省	440000	珠海市	440400
2017	2015	0.221278	22.1278	1	3.68888	0.0029169	20.2	1.38629	11.1111	1.6543	0.1502	1	0.089593	0	3.33221	C39	计算机、通信和其他电子设备制造业	广东省	440000	珠海市	440400
2017	2016	0.193737	19.3737	1	3.91202	0.0025758	28.11	0.693147	4.7619	1.81	0.1422	1	0.114607	0	3.09104	C39	计算机、通信和其他电子设备制造业	广东省	440000	珠海市	440400
2017	2017	0.214556	21.4556	1	3.82864	0.0023046	28.67	1.09861	9.09091	1.84	0.1383	1	0.028049	0	3.13549	C39	计算机、通信和其他电子设备制造业	广东省	440000	珠海市	440400
2017	2018	0.190677	19.0677	1	3.3673	0.001904	31.8	0.693147	5	2.51	0.1232	1	0.033515	0	3.04452	C39	计算机、通信和其他电子设备制造业	广东省	440000	珠海市	440400
2017	2019	0.229314	22.9314	1	3.85015	0.0026097	29.07	1.38629	11.5385	2.86	0.0943	1	0.432836	0	3.29584	C39	计算机、通信和其他电子设备制造业	广东省	440000	珠海市	440400
2017	2020	0.16217	16.217	1	3.58352	0.0022981	31.82	0	0	3.07	0.0823	1	0.013332	0	3.17805	C39	计算机、通信和其他电子设备制造业	广东省	440000	珠海市	440400
2017	2021	0.230647	23.0647	3	3.71357	0.001831	25.84	1.09861	7.40741	3.31	0.0746	1	0.021342	0	3.33221	C39	计算机、通信和其他电子设备制造业	广东省	440000	珠海市	440400
2017	2022	0.183704	18.3704	3	3.68888	0.0011978	28.54	0	0	3.81	0.0534	1	0.056928	0	3.2581	C39	计算机、通信和其他电子设备制造业	广东省	440000	珠海市	440400
2017	2023	0.183462	18.3462	5	3.63759	0.0009424	30.57	1.09861	4.87805	5.04	0.049	0	0.089404	0	3.73767	C39	计算机、通信和其他电子设备制造业	广东省	440000	珠海市	440400
2019	2011	0.124791	12.4791	2	0	0.0706229	0	0	0	0.88	0.4089	1	-0.332727	2.56495	0	C26	化学原料及化学制品制造业	浙江省	330000	临安市	330185
2019	2013	0.132561	13.2561	3	0	0.0547331	0	0	0	0.8523	0.4228	1	0.055804	2.19722	0	C27	医药制造业	浙江省	330000	临安市	330185
2019	2014	0.122011	12.2011	3	0.693147	0.0432442	0	0	0	1.29	0.1623	1	5.60736	0.693147	0.693147	C27	医药制造业	浙江省	330000	临安市	330185
2019	2015	0.120638	12.0638	3	0	0.0508557	4.29	0	0	1.25	0.1615	1	0.132533	0.693147	1.09861	C27	医药制造业	浙江省	330000	临安市	330185
2019	2016	0.129885	12.9885	3	0	0.0379774	16.56	0	0	2.5506	0.112	1	0.354091	1.79176	0	C27	医药制造业	浙江省	330000	临安市	330185
2019	2017	0.127069	12.7069	3	0	0.0359239	17.41	0	0	3.23	0.0954	1	0.738796	1.38629	0	C27	医药制造业	浙江省	330000	杭州市	330100
2019	2018	0.109673	10.9673	1	0	0.0410785	18.49	0	0	4.05	0.0881	1	0.015541	1.79176	0	C27	医药制造业	浙江省	330000	杭州市	330100
2019	2019	0.108665	10.8665	1	0	0.0649856	17.44	0	0	4.24	0.0811	1	0.13561	1.60944	0	C27	医药制造业	浙江省	330000	杭州市	330100
2019	2020	0.126642	12.6642	1	1.79176	0.0614947	17.78	0	0	4.22	0.0893	1	0.116154	1.38629	0	C27	医药制造业	浙江省	330000	杭州市	330100
2019	2021	0.114882	11.4882	1	0	0.054106	19.3	0	0	5.69	0.1059	1	0.005078	1.94591	0	C27	医药制造业	浙江省	330000	杭州市	330100
2019	2022	0.120197	12.0197	1	0.693147	0.0599013	19.57	0	0	5.74	0.1069	1	0.042359	1.60944	0	C27	医药制造业	浙江省	330000	杭州市	330100
2019	2023	0.0577374	5.77374	1	1.09861	0.146333	18.94	0	0	6.33	0.119	0	-0.097507	1.38629	0	C27	医药制造业	浙江省	330000	杭州市	330100
2020	2011	0.104046	10.4046	1	0	0.0741738	0	0	0	2.36	0.2732	1	1.39333	0.693147	1.38629	C27	医药制造业	浙江省	330000	绍兴市	330600
2020	2012	0.12037	12.037	2	0	0.0922849	0	0	0	2.35	0.2788	1	0.00837	1.38629	1.09861	C27	医药制造业	浙江省	330000	绍兴市	330600
2020	2013	0.0560746	5.60746	2	0	0.0862249	0	0	0	2.94	0.2906	0	0.058762	1.79176	1.38629	C27	医药制造业	浙江省	330000	绍兴市	330600
2020	2014	0.0432487	4.32487	2	0	0.0524889	0	0	0	3.52	0.2857	0	0.709751	1.60944	0	C27	医药制造业	浙江省	330000	绍兴市	330600
2020	2015	0.06005	6.005	2	0	0.0648259	21.72	0	0	3.96	0.2052	0	0.616332	1.38629	0.693147	C27	医药制造业	浙江省	330000	绍兴市	330600
2020	2016	0.0578991	5.78991	2	0	0.0529956	21.11	0	0	3.7068	0.1866	0	0.073389	1.38629	0.693147	C27	医药制造业	浙江省	330000	绍兴市	330600
2020	2017	0.0631249	6.31249	2	0	0.0322032	21.66	0	0	5.06	0.1388	0	0.634342	1.79176	1.09861	C27	医药制造业	浙江省	330000	绍兴市	330600
2020	2018	0.0678484	6.78484	3	0	0.0282935	14.58	0	0	6.4237	0.1426	0	-0.098894	1.79176	0.693147	C27	医药制造业	浙江省	330000	绍兴市	330600
2020	2019	0.0796446	7.96446	3	0	0.0296124	15.6	0	0	7.6	0.1614	0	0.034416	1.79176	1.94591	C27	医药制造业	浙江省	330000	绍兴市	330600
2020	2020	0.0749954	7.49954	3	0	0.0266082	14.45	0	0	7.74	0.1657	0	0.059815	1.79176	1.38629	C27	医药制造业	浙江省	330000	绍兴市	330600
2020	2021	0.0626278	6.26278	1	1.09861	0.021469	13.98	0	0	7.11	0.1688	0	0.23012	1.38629	1.79176	C27	医药制造业	浙江省	330000	绍兴市	330600
2020	2022	0.0439469	4.39469	1	0	0.0568536	15.5	0	0	6.41	0.1754	0	0.055664	1.79176	0	C27	医药制造业	浙江省	330000	绍兴市	330600
2020	2023	0.0445223	4.45223	1	0	0.0502424	16.47	0	0	6.37	0.2223	0	0.071189	1.60944	0	C27	医药制造业	浙江省	330000	绍兴市	330600
2021	2011	0.031971	3.1971	1	0	0.0437986	0	0	0	0	0.1604	0	0.138331	0	3.2581	C35	专用设备制造业	浙江省	330000	台州市	331000
2021	2012	0.0344929	3.44929	1	0	0.0983307	0	0	0	0	0.1458	0	0.011497	0	3.2581	C35	专用设备制造业	浙江省	330000	台州市	331000
2021	2013	0.0457469	4.5747	2	0	0.0847044	0	0	0	0	0.1516	0	0.025758	0	3.33221	C35	专用设备制造业	浙江省	330000	台州市	331000
2021	2014	0.0504155	5.04155	2	0.693147	0.0695638	0	0	0	0	0.1132	0	0.392896	0	3.2581	C35	专用设备制造业	浙江省	330000	台州市	331000
2021	2015	0.102901	10.2901	1	0.693147	0.147738	10.52	0	0	0	0.2218	1	-0.332785	0	0	C35	专用设备制造业	浙江省	330000	台州市	331000
2021	2016	0.0938063	9.38063	1	0.693147	0.0468598	8.6	0	0	1.22	0.1361	1	0.009032	0	0	C35	专用设备制造业	浙江省	330000	台州市	331000
2021	2017	0.109261	10.9261	1	0.693147	0.0438985	12.05	0	0	1.2	0.1223	1	-0.090558	1.60944	0	C35	专用设备制造业	浙江省	330000	台州市	331000
2021	2018	0.110942	11.0942	1	0.693147	0.0280015	13.56	0	0	0.5495	0.1792	1	-0.260331	1.60944	0	C35	专用设备制造业	浙江省	330000	台州市	331000
2022	2011	0.0555954	5.55954	3	0.693147	0.0175564	0	0	0	8.83	0.1156	0	0.101493	0	1.38629	C27	医药制造业	上海市	310000	上海市	310000
2022	2012	0.0276348	2.76348	1	0.693147	0.0163544	0	0	0	7.72	0.1371	0	0.059022	0	0.693147	C27	医药制造业	上海市	310000	上海市	310000
2022	2013	0.0251949	2.51949	1	0.693147	0.0127937	0	0	0	9.2422	0.1612	0	0.112031	0	0	C27	医药制造业	上海市	310000	上海市	310000
2022	2014	0.0366246	3.66246	1	0.693147	0.0449082	0	0	0	10.21	0.179	0	0.049289	0	1.09861	C27	医药制造业	上海市	310000	上海市	310000
2022	2015	0.114072	11.4072	1	0	0.0420469	14.73	0	0	14.63	0	1	0.361255	0.693147	1.09861	C27	医药制造业	上海市	310000	上海市	310000
2022	2016	0.118385	11.8385	1	0	0.0480254	16.68	0	0	15.09	0	1	0.101472	0.693147	1.38629	C27	医药制造业	上海市	310000	上海市	310000
[truncated: 17,577 more rows]
