# Supplementary material for: How corporate ESG performance enables New-qualitive Productive forces development based on Listed companies in the manufacturing industry: Evidence from China
Source: Research Square preprint supplement (doi:10.21203/rs.3.rs-6158355/v1), 2025-07-24
Supplement: Supplementary file 8 [file 94bc8e7cc91bee2a231cae27.xlsx]

## Sheet: sheet1
Symbol	EndDate	StateTypeCode	Area	ApplyTypeCode	ApplyType	Invention
证券代码	统计截止日期	报表类型	地区	申请类型编码	申请类型	发明专利
没有单位	没有单位	没有单位	没有单位	没有单位	没有单位	件
000008	2016-12-31	1	1	S5204	截至报告期末累计获得	56	4.04305
000008	2017-12-31	1	1	S5201	已申请		0
000008	2017-12-31	1	1	S5203	已授权		0
000008	2018-12-31	1	1	S5204	截至报告期末累计获得		0
000008	2018-12-31	1	1	S5203	已授权		0
000008	2019-12-31	1	1	S5204	截至报告期末累计获得		0
000008	2019-12-31	1	1	S5203	已授权		0
000008	2020-12-31	1	1	S5203	已授权		0
000008	2020-12-31	1	1	S5204	截至报告期末累计获得		0
000008	2021-12-31	1	1	S5203	已授权	9	2.30259
000008	2022-12-31	2	1	S5204	截至报告期末累计获得	206	5.33272
000008	2022-12-31	2	1	S5203	已授权	15	2.77259
000008	2023-12-31	1	1	S5204	截至报告期末累计获得	229	5.43808
000012	2013-12-31	1	1	S5201	已申请		0
000012	2013-12-31	1	1	S5203	已授权		0
000012	2013-12-31	1	1	S5204	截至报告期末累计获得	44	3.80666
000012	2014-12-31	1	1	S5201	已申请		0
000012	2014-12-31	1	1	S5203	已授权	12	2.56495
000012	2014-12-31	1	1	S5206	截止报告期末累计已授权	56	4.04305
000012	2015-12-31	1	1	S5201	已申请	56	4.04305
000012	2015-12-31	1	1	S5206	截止报告期末累计已授权	85	4.45435
000012	2015-12-31	1	1	S5205	截止报告期末累计已被受理		0
000012	2020-12-31	1	1	S5201	已申请	146	4.99043
000012	2020-12-31	1	1	S5203	已授权	30	3.43399
000012	2021-12-31	1	1	S5205	截止报告期末累计已被受理	922	6.82763
000012	2021-12-31	1	1	S5206	截止报告期末累计已授权	304	5.72031
000012	2021-12-31	1	1	S5201	已申请	159	5.07517
000012	2021-12-31	1	1	S5203	已授权	47	3.8712
000012	2021-12-31	1	2	S5203	已授权	3	1.38629
000012	2022-12-31	1	2	S5203	已授权	2	1.09861
000012	2022-12-31	1	1	S5205	截止报告期末累计已被受理	1101	7.00488
000012	2022-12-31	1	1	S5206	截止报告期末累计已授权	374	5.92693
000012	2022-12-31	1	1	S5201	已申请	121	4.80402
000012	2022-12-31	1	1	S5203	已授权	67	4.21951
000012	2023-12-31	1	1	S5205	截止报告期末累计已被受理	1275	7.15149
000012	2023-12-31	1	1	S5206	截止报告期末累计已授权	465	6.14419
000012	2023-12-31	1	1	S5201	已申请	156	5.05625
000012	2023-12-31	1	1	S5203	已授权	98	4.59512
000016	2019-12-31	2	1	S5201	已申请		0
000021	2013-12-31	2	1	S5201	已申请		0
000021	2013-12-31	2	1	S5203	已授权		0
000021	2014-12-31	1	1	S5201	已申请	8	2.19722
000021	2014-12-31	1	1	S5203	已授权	1	0.693147
000021	2015-12-31	1	1	S5201	已申请	16	2.83321
000021	2015-12-31	1	1	S5202	已获得	6	1.94591
000021	2015-12-31	1	1	S5204	截至报告期末累计获得	19	2.99573
000021	2016-12-31	1	1	S5201	已申请	10	2.3979
000021	2016-12-31	1	1	S5202	已获得	6	1.94591
000021	2017-12-31	1	1	S5201	已申请	2	1.09861
000021	2017-12-31	1	1	S5203	已授权	3	1.38629
000021	2018-12-31	1	1	S5201	已申请	14	2.70805
000021	2018-12-31	1	1	S5203	已授权	3	1.38629
000021	2019-12-31	1	1	S5201	已申请	36	3.61092
000021	2019-12-31	1	1	S5203	已授权	6	1.94591
000021	2020-12-31	1	1	S5201	已申请	32	3.49651
000021	2020-12-31	1	1	S5203	已授权	7	2.07944
000030	2019-12-31	1	1	S5204	截至报告期末累计获得	24	3.21888
000030	2020-12-31	1	1	S5204	截至报告期末累计获得	24	3.21888
000030	2021-12-31	1	1	S5204	截至报告期末累计获得	24	3.21888
000030	2022-12-31	1	1	S5201	已申请	54	4.00733
000030	2023-12-31	1	1	S5201	已申请	79	4.38203
000039	2014-12-31	1	1	S5201	已申请		0
000039	2018-12-31	1	1	S5205	截止报告期末累计已被受理	251	5.52943
000039	2019-12-31	1	1	S5205	截止报告期末累计已被受理	266	5.58725
000039	2020-12-31	1	1	S5204	截至报告期末累计获得		0
000039	2020-12-31	1	1	S5201	已申请	247	5.51343
000039	2020-12-31	1	1	S5206	截止报告期末累计已授权	799	6.68461
000039	2021-12-31	1	1	S5201	已申请	185	5.22575
000039	2021-12-31	1	1	S5204	截至报告期末累计获得		0
000039	2022-12-31	1	1	S5201	已申请	229	5.43808
000039	2022-12-31	1	1	S5204	截至报告期末累计获得		0
000039	2023-12-31	1	1	S5201	已申请	292	5.68017
000039	2023-12-31	1	1	S5204	截至报告期末累计获得		0
000045	2013-12-31	1	1	S5201	已申请	1	0.693147
000045	2013-12-31	1	1	S5204	截至报告期末累计获得	4	1.60944
000045	2013-12-31	1	2	S5204	截至报告期末累计获得		0
000045	2014-12-31	1	1	S5201	已申请	2	1.09861
000045	2014-12-31	1	1	S5205	截止报告期末累计已被受理	4	1.60944
000045	2014-12-31	1	2	S5205	截止报告期末累计已被受理		0
000045	2015-12-31	1	1	S5201	已申请	2	1.09861
000045	2015-12-31	1	1	S5203	已授权		0
000045	2015-12-31	1	1	S5205	截止报告期末累计已被受理	13	2.63906
000045	2015-12-31	1	1	S5206	截止报告期末累计已授权	4	1.60944
000045	2015-12-31	1	2	S5205	截止报告期末累计已被受理	1	0.693147
000045	2015-12-31	1	2	S5206	截止报告期末累计已授权	0	0
000045	2016-12-31	1	1	S5205	截止报告期末累计已被受理	15	2.77259
000045	2016-12-31	1	2	S5205	截止报告期末累计已被受理	1	0.693147
000045	2016-12-31	1	2	S5206	截止报告期末累计已授权		0
000045	2016-12-31	1	1	S5206	截止报告期末累计已授权	7	2.07944
000045	2017-12-31	1	1	S5205	截止报告期末累计已被受理	16	2.83321
000045	2017-12-31	1	1	S5206	截止报告期末累计已授权	7	2.07944
000045	2017-12-31	1	2	S5205	截止报告期末累计已被受理	1	0.693147
000045	2017-12-31	1	2	S5206	截止报告期末累计已授权	0	0
000045	2017-12-31	1	1	S5201	已申请	1	0.693147
000045	2017-12-31	1	2	S5201	已申请		0
000045	2018-12-31	1	1	S5201	已申请	4	1.60944
000045	2018-12-31	1	2	S5201	已申请		0
000045	2018-12-31	1	1	S5205	截止报告期末累计已被受理	23	3.17805
000045	2018-12-31	1	1	S5206	截止报告期末累计已授权	8	2.19722
000045	2018-12-31	1	2	S5205	截止报告期末累计已被受理	1	0.693147
000045	2018-12-31	1	2	S5206	截止报告期末累计已授权	0	0
000045	2020-12-31	1	1	S5201	已申请	2	1.09861
000045	2020-12-31	1	1	S5203	已授权	3	1.38629
000045	2023-12-31	1	1	S5206	截止报告期末累计已授权	18	2.94444
000045	2023-12-31	1	2	S5206	截止报告期末累计已授权	0	0
000045	2023-12-31	1	1	S5201	已申请	5	1.79176
000045	2023-12-31	1	1	S5203	已授权	1	0.693147
000048	2017-12-31	1	1	S5201	已申请	1	0.693147
000048	2022-12-31	1	1	S5202	已获得		0
000048	2023-12-31	1	1	S5204	截至报告期末累计获得	2	1.09861
000049	2013-12-31	1	1	S5201	已申请	59	4.09434
000049	2013-12-31	1	1	S5203	已授权	6	1.94591
000049	2013-12-31	1	1	S5206	截止报告期末累计已授权	24	3.21888
000049	2014-12-31	1	1	S5201	已申请	54	4.00733
000049	2014-12-31	1	1	S5203	已授权	12	2.56495
000049	2014-12-31	1	1	S5206	截止报告期末累计已授权	34	3.55535
000049	2015-12-31	1	1	S5201	已申请		0
000049	2015-12-31	1	1	S5203	已授权		0
000049	2016-12-31	1	1	S5201	已申请	82	4.41884
000049	2016-12-31	1	1	S5202	已获得	16	2.83321
000049	2017-12-31	1	1	S5204	截至报告期末累计获得	43	3.78419
000049	2017-12-31	1	1	S5205	截止报告期末累计已被受理	79	4.38203
000049	2017-12-31	1	1	S5206	截止报告期末累计已授权	22	3.13549
000049	2018-12-31	1	1	S5204	截至报告期末累计获得	61	4.12713
000049	2018-12-31	1	1	S5201	已申请	27	3.3322
000049	2018-12-31	1	1	S5203	已授权	19	2.99573
000049	2019-12-31	1	1	S5204	截至报告期末累计获得	87	4.47734
000049	2019-12-31	1	1	S5201	已申请	18	2.94444
000049	2019-12-31	1	1	S5203	已授权	28	3.3673
000049	2020-12-31	1	1	S5204	截至报告期末累计获得	107	4.68213
000049	2020-12-31	1	1	S5201	已申请	21	3.09104
000049	2020-12-31	1	1	S5203	已授权	24	3.21888
000049	2021-12-31	1	1	S5204	截至报告期末累计获得	118	4.77912
000049	2021-12-31	1	1	S5201	已申请	19	2.99573
000049	2021-12-31	1	1	S5203	已授权	16	2.83321
000049	2022-12-31	1	1	S5204	截至报告期末累计获得	134	4.90527
000049	2022-12-31	1	1	S5201	已申请	27	3.3322
000049	2022-12-31	1	1	S5203	已授权	16	2.83321
000049	2023-12-31	1	1	S5204	截至报告期末累计获得	158	5.0689
000049	2023-12-31	1	1	S5201	已申请	52	3.97029
000049	2023-12-31	1	1	S5203	已授权	24	3.21888
000050	2015-12-31	1	1	S5201	已申请	1631	7.39756
000050	2015-12-31	1	1	S5202	已获得	574	6.35437
000050	2015-12-31	1	1	S5204	截至报告期末累计获得	2571	7.85244
000055	2013-12-31	1	1	S5204	截至报告期末累计获得	56	4.04305
000055	2015-12-31	1	1	S5202	已获得	69	4.2485
000055	2015-12-31	1	1	S5201	已申请	7	2.07944
000055	2016-12-31	1	1	S5204	截至报告期末累计获得	80	4.39445
000055	2016-12-31	1	2	S5204	截至报告期末累计获得		0
000055	2016-12-31	1	1	S5203	已授权	10	2.3979
000055	2017-12-31	1	1	S5201	已申请	6	1.94591
000055	2017-12-31	1	1	S5204	截至报告期末累计获得	107	4.68213
000055	2017-12-31	1	2	S5204	截至报告期末累计获得		0
000055	2018-12-31	1	1	S5204	截至报告期末累计获得	83	4.43082
000055	2018-12-31	1	1	S5201	已申请		0
000055	2018-12-31	1	1	S5203	已授权	4	1.60944
000055	2019-12-31	1	1	S5204	截至报告期末累计获得	188	5.24175
000055	2019-12-31	1	2	S5204	截至报告期末累计获得		0
000055	2019-12-31	1	1	S5201	已申请		0
000055	2019-12-31	1	1	S5203	已授权	1	0.693147
000055	2020-12-31	1	1	S5201	已申请		0
000055	2020-12-31	1	1	S5203	已授权		0
000055	2021-12-31	1	1	S5203	已授权		0
000055	2023-12-31	1	1	S5201	已申请		0
000055	2023-12-31	1	1	S5203	已授权		0
000060	2021-12-31	1	1	S5203	已授权		0
000060	2022-12-31	1	1	S5206	截止报告期末累计已授权		0
000060	2023-12-31	1	1	S5203	已授权		0
000063	2019-12-31	1	1	S5205	截止报告期末累计已被受理		0
000063	2022-12-31	1	1	S5206	截止报告期末累计已授权		0
000063	2022-12-31	1	1	S5205	截止报告期末累计已被受理		0
000063	2023-12-31	1	1	S5206	截止报告期末累计已授权		0
000063	2023-12-31	1	1	S5205	截止报告期末累计已被受理		0
000066	2017-12-31	1	1	S5201	已申请	90	4.51086
000066	2018-12-31	1	1	S5201	已申请	47	3.8712
000066	2018-12-31	1	1	S5203	已授权		0
000066	2019-12-31	1	1	S5203	已授权		0
000066	2020-12-31	2	1	S5201	已申请		0
000066	2020-12-31	2	1	S5203	已授权	29	3.4012
000066	2021-12-31	1	1	S5203	已授权	38	3.66356
000066	2022-12-31	1	1	S5201	已申请	173	5.15906
000066	2022-12-31	1	1	S5203	已授权	47	3.8712
000066	2023-12-31	1	1	S5204	截至报告期末累计获得		0
000066	2023-12-31	1	1	S5201	已申请	191	5.2575
000070	2013-12-31	1	1	S5201	已申请		0
000070	2013-12-31	1	1	S5202	已获得	2	1.09861
000070	2014-12-31	1	1	S5201	已申请		0
000070	2014-12-31	1	1	S5202	已获得	4	1.60944
000070	2015-12-31	1	1	S5204	截至报告期末累计获得	12	2.56495
000070	2015-12-31	1	1	S5202	已获得	2	1.09861
000070	2016-12-31	1	1	S5202	已获得		0
000070	2017-12-31	1	1	S5204	截至报告期末累计获得	23	3.17805
000070	2017-12-31	1	1	S5202	已获得		0
000070	2018-12-31	1	1	S5204	截至报告期末累计获得	33	3.52636
000070	2018-12-31	1	1	S5202	已获得	8	2.19722
000070	2019-12-31	1	1	S5204	截至报告期末累计获得	62	4.14313
000070	2019-12-31	1	1	S5202	已获得	13	2.63906
000070	2020-12-31	1	1	S5204	截至报告期末累计获得	75	4.33073
000070	2020-12-31	1	1	S5202	已获得	12	2.56495
000070	2021-12-31	1	1	S5204	截至报告期末累计获得	88	4.48864
000070	2022-12-31	1	1	S5204	截至报告期末累计获得	122	4.81218
000070	2022-12-31	1	1	S5202	已获得	27	3.3322
000070	2022-12-31	1	1	S5201	已申请		0
000070	2023-12-31	1	1	S5204	截至报告期末累计获得	134	4.90527
000100	2013-12-31	1	1	S5205	截止报告期末累计已被受理		0
000100	2013-12-31	1	1	S5206	截止报告期末累计已授权		0
000100	2014-12-31	1	1	S5205	截止报告期末累计已被受理		0
000100	2014-12-31	1	1	S5206	截止报告期末累计已授权		0
000100	2015-12-31	1	1	S5203	已授权	2780	7.93057
000100	2015-12-31	1	1	S5201	已申请	3758	8.23191
000100	2015-12-31	1	1	S5205	截止报告期末累计已被受理		0
000100	2015-12-31	1	2	S5205	截止报告期末累计已被受理	4592	8.43229
000100	2015-12-31	1	1	S5206	截止报告期末累计已授权		0
000100	2015-12-31	1	2	S5206	截止报告期末累计已授权		0
000100	2016-12-31	1	1	S5205	截止报告期末累计已被受理		0
000100	2016-12-31	1	2	S5205	截止报告期末累计已被受理		0
000100	2016-12-31	1	2	S5206	截止报告期末累计已授权		0
000100	2016-12-31	1	1	S5206	截止报告期末累计已授权		0
000100	2017-12-31	1	2	S5201	已申请		0
000100	2017-12-31	1	2	S5202	已获得		0
000100	2017-12-31	1	2	S5205	截止报告期末累计已被受理		0
000100	2017-12-31	1	1	S5205	截止报告期末累计已被受理	22065	10.0018
000100	2017-12-31	1	1	S5203	已授权		0
000100	2017-12-31	1	2	S5203	已授权		0
000100	2018-12-31	1	2	S5201	已申请		0
000100	2018-12-31	1	2	S5205	截止报告期末累计已被受理		0
000100	2018-12-31	1	1	S5205	截止报告期末累计已被受理		0
000100	2019-12-31	2	2	S5201	已申请		0
000100	2019-12-31	2	2	S5205	截止报告期末累计已被受理		0
000100	2020-12-31	1	2	S5201	已申请		0
000100	2020-12-31	1	2	S5205	截止报告期末累计已被受理		0
000100	2021-12-31	1	2	S5201	已申请		0
000100	2021-12-31	1	2	S5205	截止报告期末累计已被受理		0
000100	2022-12-31	1	2	S5205	截止报告期末累计已被受理		0
000100	2022-12-31	1	2	S5201	已申请		0
000100	2023-12-31	1	2	S5201	已申请		0
000100	2023-12-31	1	1	S5205	截止报告期末累计已被受理		0
000153	2013-12-31	1	1	S5201	已申请	20	3.04452
000153	2013-12-31	1	1	S5203	已授权	38	3.66356
000153	2014-12-31	1	1	S5201	已申请	26	3.29584
000153	2014-12-31	1	1	S5203	已授权	22	3.13549
000153	2015-12-31	1	1	S5201	已申请	15	2.77259
000153	2015-12-31	1	1	S5203	已授权	7	2.07944
000153	2016-12-31	1	1	S5201	已申请	12	2.56495
000153	2016-12-31	1	1	S5203	已授权	9	2.30259
000153	2017-12-31	1	1	S5201	已申请	14	2.70805
000153	2017-12-31	1	1	S5203	已授权	9	2.30259
000153	2018-12-31	1	1	S5203	已授权	13	2.63906
000153	2019-12-31	1	1	S5203	已授权	4	1.60944
000153	2019-12-31	1	1	S5206	截止报告期末累计已授权	124	4.82831
000153	2020-12-31	1	1	S5203	已授权	4	1.60944
000153	2020-12-31	1	1	S5201	已申请	18	2.94444
000153	2020-12-31	1	1	S5204	截至报告期末累计获得	138	4.93447
000153	2021-12-31	1	1	S5206	截止报告期末累计已授权	139	4.94164
000153	2022-12-31	1	1	S5206	截止报告期末累计已授权	139	4.94164
000153	2023-12-31	1	1	S5206	截止报告期末累计已授权	151	5.02388
000157	2013-12-31	1	1	S5201	已申请		0
000157	2015-12-31	1	1	S5203	已授权		0
000157	2016-12-31	1	1	S5203	已授权		0
000157	2017-12-31	1	1	S5203	已授权	271	5.6058
000157	2017-12-31	1	2	S5203	已授权	8	2.19722
000157	2019-12-31	1	1	S5203	已授权	101	4.62497
000157	2020-12-31	1	1	S5203	已授权	168	5.1299
000157	2021-12-31	1	1	S5203	已授权		0
000157	2021-12-31	1	1	S5205	截止报告期末累计已被受理		0
000157	2021-12-31	1	1	S5206	截止报告期末累计已授权		0
000157	2022-12-31	1	1	S5206	截止报告期末累计已授权		0
000157	2022-12-31	1	1	S5205	截止报告期末累计已被受理		0
000157	2023-12-31	1	1	S5205	截止报告期末累计已被受理	6753	8.81789
000157	2023-12-31	1	1	S5206	截止报告期末累计已授权		0
000157	2023-12-31	1	1	S5204	截至报告期末累计获得		0
000301	2018-12-31	1	1	S5204	截至报告期末累计获得	29	3.4012
000301	2019-12-31	1	1	S5204	截至报告期末累计获得	31	3.46574
000301	2020-12-31	1	1	S5204	截至报告期末累计获得		0
000301	2020-12-31	1	2	S5204	截至报告期末累计获得		0
000301	2021-12-31	1	1	S5204	截至报告期末累计获得	45	3.82864
000301	2022-12-31	1	1	S5204	截至报告期末累计获得	56	4.04305
000301	2023-12-31	1	1	S5204	截至报告期末累计获得	102	4.63473
000301	2023-12-31	1	1	S5201	已申请		0
000333	2013-12-31	1	1	S5205	截止报告期末累计已被受理		0
000333	2014-12-31	1	1	S5201	已申请	2585	7.85787
000333	2014-12-31	1	1	S5206	截止报告期末累计已授权	1200	7.09091
000333	2015-12-31	1	1	S5204	截至报告期末累计获得	1452	7.28139
000333	2015-12-31	1	1	S5201	已申请	4205	8.34427
000333	2015-12-31	1	1	S5206	截止报告期末累计已授权		0
000333	2016-12-31	1	1	S5201	已申请	5562	8.62389
000333	2017-12-31	1	1	S5201	已申请	7714	8.95092
000333	2018-12-31	2	1	S5201	已申请	6102	8.71654
000333	2019-12-31	2	1	S5203	已授权	2704	7.90286
000333	2019-12-31	2	1	S5201	已申请		0
000333	2020-12-31	2	1	S5202	已获得	2890	7.96936
000333	2020-12-31	2	2	S5203	已授权		0
000333	2023-12-31	1	1	S5204	截至报告期末累计获得	28000	10.24
000333	2023-12-31	1	1	S5206	截止报告期末累计已授权		0
000333	2023-12-31	1	1	S5203	已授权		0
000338	2015-12-31	1	1	S5201	已申请	20	3.04452
000338	2015-12-31	1	1	S5202	已获得		0
000400	2014-12-31	1	1	S5203	已授权		0
000400	2015-12-31	1	1	S5201	已申请	383	5.95064
000400	2015-12-31	1	1	S5203	已授权	75	4.33073
000400	2016-12-31	1	1	S5201	已申请	417	6.03548
000400	2016-12-31	1	1	S5203	已授权	112	4.72739
000400	2017-12-31	1	1	S5201	已申请	421	6.04501
000400	2017-12-31	1	1	S5203	已授权		0
000400	2018-12-31	1	1	S5201	已申请	273	5.61313
000400	2018-12-31	1	1	S5203	已授权	124	4.82831
000400	2018-12-31	1	2	S5203	已授权		0
000400	2019-12-31	1	1	S5203	已授权	245	5.50533
000400	2020-12-31	1	1	S5201	已申请		0
000401	2023-12-31	1	1	S5204	截至报告期末累计获得	168	5.1299
000403	2013-12-31	1	1	S5201	已申请		0
000403	2013-12-31	1	1	S5203	已授权		0
000403	2016-12-31	1	1	S5202	已获得		0
000403	2017-12-31	1	1	S5206	截止报告期末累计已授权	7	2.07944
000403	2018-12-31	1	1	S5204	截至报告期末累计获得	9	2.30259
000403	2019-12-31	1	1	S5204	截至报告期末累计获得	9	2.30259
000403	2020-12-31	1	1	S5204	截至报告期末累计获得	20	3.04452
000403	2021-12-31	1	1	S5204	截至报告期末累计获得		0
000403	2022-12-31	1	1	S5204	截至报告期末累计获得		0
000403	2023-12-31	1	1	S5206	截止报告期末累计已授权		0
000404	2013-12-31	1	1	S5201	已申请	4	1.60944
000404	2013-12-31	1	1	S5204	截至报告期末累计获得	13	2.63906
000404	2014-12-31	1	1	S5203	已授权	2	1.09861
000404	2015-12-31	1	1	S5201	已申请		0
000404	2015-12-31	1	1	S5203	已授权	3	1.38629
000404	2016-12-31	1	1	S5204	截至报告期末累计获得	26	3.29584
000404	2016-12-31	1	1	S5201	已申请		0
000404	2016-12-31	1	1	S5203	已授权	8	2.19722
000404	2017-12-31	1	1	S5201	已申请	24	3.21888
000404	2017-12-31	1	1	S5202	已获得	3	1.38629
000404	2019-12-31	1	1	S5203	已授权	4	1.60944
000404	2020-12-31	1	1	S5203	已授权		0
000404	2023-12-31	1	1	S5206	截止报告期末累计已授权		0
000404	2023-12-31	1	1	S5202	已获得	11	2.48491
000408	2021-12-31	1	1	S5204	截至报告期末累计获得	1	0.693147
000408	2022-12-31	1	1	S5204	截至报告期末累计获得	4	1.60944
000408	2023-12-31	1	1	S5204	截至报告期末累计获得	4	1.60944
000410	2013-12-31	1	1	S5203	已授权		0
000410	2013-12-31	1	1	S5204	截至报告期末累计获得		0
000410	2015-12-31	1	1	S5204	截至报告期末累计获得		0
000410	2016-12-31	1	1	S5203	已授权	8	2.19722
000410	2017-12-31	1	1	S5201	已申请	8	2.19722
000410	2017-12-31	1	1	S5203	已授权	7	2.07944
000410	2021-12-31	1	1	S5202	已获得		0
000410	2022-12-31	1	1	S5203	已授权	4	1.60944
000413	2015-12-31	1	1	S5201	已申请	40	3.71357
000413	2015-12-31	1	1	S5202	已获得	1	0.693147
000413	2015-12-31	1	1	S5204	截至报告期末累计获得	1	0.693147
000418	2015-12-31	1	1	S5201	已申请	528	6.27099
000418	2015-12-31	1	1	S5202	已获得	30	3.43399
000418	2015-12-31	1	1	S5204	截至报告期末累计获得	49	3.91202
000423	2015-12-31	1	1	S5201	已申请	32	3.49651
000423	2015-12-31	1	1	S5202	已获得	2	1.09861
000423	2015-12-31	1	1	S5204	截至报告期末累计获得	48	3.89182
000423	2016-12-31	1	1	S5203	已授权	25	3.2581
000423	2016-12-31	1	1	S5201	已申请	25	3.2581
000423	2017-12-31	1	1	S5206	截止报告期末累计已授权	20	3.04452
000423	2017-12-31	1	1	S5205	截止报告期末累计已被受理	52	3.97029
000423	2018-12-31	1	1	S5206	截止报告期末累计已授权	17	2.89037
000423	2019-12-31	2	1	S5206	截止报告期末累计已授权		0
000423	2022-12-31	1	2	S5206	截止报告期末累计已授权		0
000425	2016-12-31	1	1	S5203	已授权		0
000425	2016-12-31	1	1	S5202	已获得	307	5.7301
000425	2017-12-31	1	1	S5206	截止报告期末累计已授权	1046	6.95368
000425	2017-12-31	1	1	S5203	已授权		0
000425	2017-12-31	1	2	S5206	截止报告期末累计已授权		0
000425	2017-12-31	1	1	S5204	截至报告期末累计获得	1041	6.9489
000425	2017-12-31	1	1	S5201	已申请	274	5.61677
000425	2018-12-31	1	1	S5204	截至报告期末累计获得	1282	7.15696
000425	2018-12-31	1	2	S5204	截至报告期末累计获得		0
000425	2018-12-31	1	1	S5203	已授权	234	5.45959
000425	2018-12-31	1	2	S5203	已授权		0
000425	2019-12-31	2	1	S5206	截止报告期末累计已授权	1372	7.22475
000425	2019-12-31	1	1	S5203	已授权	170	5.14166
000425	2019-12-31	1	2	S5203	已授权		0
000425	2019-12-31	1	2	S5204	截至报告期末累计获得		0
000425	2019-12-31	1	1	S5204	截至报告期末累计获得	1372	7.22475
000425	2020-12-31	1	1	S5206	截止报告期末累计已授权	1537	7.33824
000425	2020-12-31	1	1	S5203	已授权	96	4.57471
000425	2020-12-31	1	2	S5203	已授权		0
000425	2020-12-31	1	2	S5204	截至报告期末累计获得		0
000425	2020-12-31	1	1	S5204	截至报告期末累计获得	1545	7.34343
000425	2021-12-31	1	1	S5203	已授权		0
000425	2021-12-31	1	1	S5206	截止报告期末累计已授权	1670	7.42118
000425	2021-12-31	1	2	S5202	已获得		0
000425	2021-12-31	1	2	S5204	截至报告期末累计获得		0
000425	2021-12-31	1	1	S5202	已获得	145	4.98361
000425	2021-12-31	1	1	S5204	截至报告期末累计获得	1670	7.42118
000425	2022-12-31	1	1	S5204	截至报告期末累计获得	2458	7.80751
000425	2022-12-31	1	2	S5204	截至报告期末累计获得		0
000425	2022-12-31	1	1	S5203	已授权	484	6.18415
000425	2023-12-31	1	1	S5204	截至报告期末累计获得	3271	8.09316
000425	2023-12-31	1	2	S5204	截至报告期末累计获得		0
000425	2023-12-31	1	1	S5203	已授权	800	6.68586
000488	2016-12-31	1	1	S5202	已获得	9	2.30259
000488	2017-12-31	1	1	S5206	截止报告期末累计已授权	12	2.56495
000488	2019-12-31	1	1	S5206	截止报告期末累计已授权	18	2.94444
000488	2019-12-31	1	1	S5201	已申请		0
000488	2019-12-31	1	1	S5203	已授权		0
000488	2020-12-31	1	1	S5206	截止报告期末累计已授权	25	3.2581
000488	2020-12-31	1	1	S5203	已授权		0
000488	2021-12-31	1	1	S5203	已授权		0
000488	2023-12-31	1	1	S5201	已申请		0
000488	2023-12-31	1	1	S5203	已授权		0
000488	2023-12-31	1	1	S5206	截止报告期末累计已授权	41	3.73767
000505	2022-12-31	1	1	S5204	截至报告期末累计获得		0
000505	2023-12-31	1	1	S5204	截至报告期末累计获得		0
000510	2020-12-31	1	1	S5202	已获得	1	0.693147
000511	2016-12-31	1	1	S5205	截止报告期末累计已被受理		0
000511	2017-12-31	1	1	S5201	已申请		0
000511	2017-12-31	1	1	S5203	已授权		0
000513	2013-12-31	1	1	S5201	已申请	25	3.2581
000513	2013-12-31	1	2	S5201	已申请		0
000513	2013-12-31	1	1	S5203	已授权	17	2.89037
000513	2014-12-31	1	1	S5201	已申请	37	3.63759
000513	2014-12-31	1	2	S5201	已申请		0
000513	2014-12-31	1	1	S5203	已授权	18	2.94444
000519	2015-12-31	1	1	S5201	已申请	13	2.63906
000519	2015-12-31	1	1	S5202	已获得	26	3.29584
000519	2015-12-31	1	1	S5204	截至报告期末累计获得	44	3.80666
000519	2015-12-31	1	1	S5206	截止报告期末累计已授权		0
000519	2016-12-31	1	1	S5201	已申请	10	2.3979
000519	2017-12-31	1	1	S5203	已授权	7	2.07944
000519	2017-12-31	1	1	S5201	已申请	2	1.09861
000523	2016-12-31	1	1	S5202	已获得	2	1.09861
000523	2016-12-31	1	1	S5203	已授权	2	1.09861
000523	2017-12-31	1	1	S5201	已申请	2	1.09861
000523	2018-12-31	1	1	S5201	已申请	7	2.07944
000523	2018-12-31	1	1	S5203	已授权	3	1.38629
000523	2019-12-31	1	1	S5203	已授权	3	1.38629
000523	2019-12-31	1	1	S5201	已申请	10	2.3979
000525	2019-12-31	1	1	S5205	截止报告期末累计已被受理		0
000525	2022-12-31	1	1	S5204	截至报告期末累计获得		0
000525	2022-12-31	1	1	S5205	截止报告期末累计已被受理		0
000525	2023-12-31	1	1	S5204	截至报告期末累计获得		0
000525	2023-12-31	1	1	S5205	截止报告期末累计已被受理		0
000528	2013-12-31	1	1	S5201	已申请		0
000528	2013-12-31	1	1	S5203	已授权		0
000528	2014-12-31	1	1	S5201	已申请	160	5.0814
000528	2014-12-31	1	2	S5201	已申请		0
000528	2014-12-31	1	1	S5203	已授权	32	3.49651
000528	2014-12-31	1	2	S5203	已授权		0
000528	2015-12-31	1	1	S5201	已申请	98	4.59512
000528	2015-12-31	1	1	S5203	已授权	73	4.30407
000528	2016-12-31	1	1	S5201	已申请	126	4.84419
000528	2016-12-31	1	1	S5203	已授权	84	4.44265
000528	2017-12-31	1	1	S5201	已申请	141	4.95583
000528	2017-12-31	1	1	S5203	已授权	98	4.59512
000528	2018-12-31	1	1	S5204	截至报告期末累计获得	379	5.94017
000528	2018-12-31	1	1	S5201	已申请	133	4.89784
000528	2018-12-31	1	2	S5201	已申请	5	1.79176
000528	2018-12-31	1	1	S5203	已授权	66	4.20469
000528	2019-12-31	1	1	S5201	已申请	100	4.61512
000528	2019-12-31	1	2	S5201	已申请	22	3.13549
000528	2019-12-31	1	1	S5203	已授权	52	3.97029
000528	2019-12-31	1	2	S5203	已授权	1	0.693147
000528	2019-12-31	1	1	S5204	截至报告期末累计获得		0
000528	2020-12-31	1	1	S5201	已申请		0
000528	2020-12-31	1	1	S5203	已授权		0
000528	2020-12-31	1	1	S5204	截至报告期末累计获得		0
000528	2021-12-31	1	1	S5201	已申请		0
000528	2021-12-31	1	1	S5203	已授权	73	4.30407
000528	2021-12-31	1	1	S5204	截至报告期末累计获得	732	6.59715
000528	2022-12-31	1	1	S5204	截至报告期末累计获得	776	6.65544
000528	2022-12-31	1	1	S5201	已申请	126	4.84419
000528	2023-12-31	1	1	S5204	截至报告期末累计获得	882	6.78333
000528	2023-12-31	1	1	S5201	已申请	113	4.7362
000530	2013-12-31	1	1	S5201	已申请		0
000530	2019-12-31	1	1	S5203	已授权	3	1.38629
000533	2016-12-31	1	1	S5201	已申请		0
000533	2019-12-31	1	1	S5202	已获得	2	1.09861
000533	2020-12-31	1	1	S5202	已获得	2	1.09861
000533	2022-12-31	1	1	S5204	截至报告期末累计获得	16	2.83321
000533	2022-12-31	1	1	S5201	已申请	3	1.38629
000533	2022-12-31	1	1	S5203	已授权	2	1.09861
000533	2023-12-31	1	1	S5204	截至报告期末累计获得	18	2.94444
000534	2016-12-31	1	1	S5201	已申请	13	2.63906
000534	2016-12-31	1	1	S5203	已授权		0
000534	2018-12-31	1	1	S5205	截止报告期末累计已被受理	21	3.09104
000534	2018-12-31	1	1	S5206	截止报告期末累计已授权	12	2.56495
000534	2019-12-31	1	1	S5206	截止报告期末累计已授权		0
000534	2019-12-31	1	1	S5205	截止报告期末累计已被受理	63	4.15888
000536	2015-12-31	1	1	S5201	已申请	17	2.89037
000536	2015-12-31	1	1	S5202	已获得	109	4.70048
000536	2015-12-31	1	1	S5204	截至报告期末累计获得	800	6.68586
000538	2015-12-31	1	1	S5202	已获得	101	4.62497
000538	2022-12-31	1	1	S5201	已申请		0
000538	2022-12-31	1	1	S5203	已授权		0
000541	2015-12-31	1	1	S5201	已申请	11	2.48491
000541	2015-12-31	1	1	S5202	已获得	1	0.693147
000541	2015-12-31	1	1	S5204	截至报告期末累计获得	5	1.79176
000541	2016-12-31	1	1	S5201	已申请	10	2.3979
000541	2019-12-31	1	1	S5206	截止报告期末累计已授权		0
000541	2019-12-31	1	2	S5206	截止报告期末累计已授权		0
000541	2019-12-31	1	1	S5201	已申请	12	2.56495
000541	2019-12-31	1	2	S5201	已申请		0
000541	2019-12-31	1	1	S5202	已获得	9	2.30259
000541	2019-12-31	1	2	S5202	已获得		0
000541	2020-12-31	1	1	S5206	截止报告期末累计已授权		0
000541	2020-12-31	1	2	S5206	截止报告期末累计已授权		0
000541	2020-12-31	1	1	S5201	已申请		0
000541	2020-12-31	1	1	S5203	已授权		0
000541	2021-12-31	1	1	S5206	截止报告期末累计已授权		0
000541	2021-12-31	1	1	S5203	已授权		0
000541	2021-12-31	1	1	S5201	已申请		0
000541	2022-12-31	1	1	S5203	已授权		0
000541	2023-12-31	1	1	S5206	截止报告期末累计已授权		0
000541	2023-12-31	1	1	S5203	已授权	52	3.97029
000545	2014-12-31	1	1	S5201	已申请	2	1.09861
000545	2014-12-31	1	1	S5203	已授权	1	0.693147
000545	2016-12-31	1	1	S5201	已申请	2	1.09861
000545	2017-12-31	1	1	S5205	截止报告期末累计已被受理	2	1.09861
000545	2019-12-31	1	1	S5201	已申请	3	1.38629
000545	2019-12-31	1	1	S5203	已授权		0
000545	2020-12-31	1	1	S5204	截至报告期末累计获得	6	1.94591
000545	2020-12-31	1	1	S5201	已申请	4	1.60944
000545	2020-12-31	1	1	S5203	已授权	1	0.693147
000545	2021-12-31	1	1	S5204	截至报告期末累计获得	7	2.07944
000545	2021-12-31	1	1	S5201	已申请	2	1.09861
000545	2021-12-31	1	1	S5203	已授权	1	0.693147
000545	2022-12-31	1	1	S5206	截止报告期末累计已授权	8	2.19722
000545	2023-12-31	1	1	S5204	截至报告期末累计获得	10	2.3979
000547	2014-12-31	1	1	S5201	已申请	29	3.4012
000547	2014-12-31	1	1	S5202	已获得	2	1.09861
000547	2015-12-31	1	1	S5202	已获得		0
000547	2016-12-31	1	1	S5204	截至报告期末累计获得		0
000547	2017-12-31	1	1	S5204	截至报告期末累计获得		0
000547	2018-12-31	1	1	S5204	截至报告期末累计获得		0
000547	2022-12-31	1	1	S5204	截至报告期末累计获得	187	5.23644
000547	2023-12-31	1	1	S5204	截至报告期末累计获得	219	5.39363
000550	2015-12-31	1	1	S5201	已申请	32	3.49651
000550	2015-12-31	1	1	S5202	已获得	6	1.94591
000550	2015-12-31	1	1	S5204	截至报告期末累计获得	22	3.13549
000553	2013-12-31	1	1	S5201	已申请	9	2.30259
000553	2013-12-31	1	1	S5203	已授权	3	1.38629
000553	2013-12-31	1	1	S5204	截至报告期末累计获得	16	2.83321
000553	2014-12-31	1	1	S5201	已申请		0
000553	2014-12-31	1	1	S5203	已授权	3	1.38629
000553	2014-12-31	1	1	S5204	截至报告期末累计获得	19	2.99573
000553	2015-12-31	1	1	S5201	已申请	2	1.09861
000553	2015-12-31	1	1	S5202	已获得	2	1.09861
000553	2015-12-31	1	1	S5204	截至报告期末累计获得	20	3.04452
000553	2016-12-31	1	1	S5201	已申请	6	1.94591
000553	2016-12-31	1	1	S5203	已授权		0
000553	2016-12-31	1	1	S5204	截至报告期末累计获得	24	3.21888
000559	2015-12-31	1	1	S5201	已申请	69	4.2485
000559	2015-12-31	1	1	S5202	已获得	19	2.99573
000559	2015-12-31	1	1	S5204	截至报告期末累计获得	67	4.21951
000559	2021-12-31	1	1	S5203	已授权	10	2.3979
000559	2021-12-31	1	1	S5206	截止报告期末累计已授权	196	5.2832
000559	2022-12-31	1	1	S5204	截至报告期末累计获得	264	5.57973
000559	2022-12-31	1	1	S5203	已授权	59	4.09434
000559	2023-12-31	1	1	S5206	截止报告期末累计已授权	350	5.86079
000559	2023-12-31	1	1	S5203	已授权	79	4.38203
000561	2013-12-31	1	1	S5203	已授权		0
000561	2017-12-31	1	1	S5203	已授权	9	2.30259
000561	2019-12-31	1	1	S5203	已授权	14	2.70805
000561	2020-12-31	1	1	S5203	已授权	14	2.70805
000561	2021-12-31	1	1	S5203	已授权	11	2.48491
000561	2023-12-31	1	1	S5203	已授权	22	3.13549
000565	2013-12-31	1	1	S5202	已获得	3	1.38629
000565	2013-12-31	1	1	S5201	已申请	3	1.38629
000565	2014-12-31	1	1	S5201	已申请	2	1.09861
000565	2015-12-31	1	1	S5201	已申请	1	0.693147
000565	2015-12-31	1	1	S5202	已获得	3	1.38629
000565	2015-12-31	1	1	S5204	截至报告期末累计获得	7	2.07944
000565	2016-12-31	1	1	S5201	已申请	2	1.09861
000565	2017-12-31	1	1	S5201	已申请	14	2.70805
000565	2018-12-31	1	1	S5201	已申请	4	1.60944
000565	2018-12-31	1	1	S5202	已获得	1	0.693147
000565	2019-12-31	1	1	S5201	已申请	5	1.79176
000565	2019-12-31	1	1	S5202	已获得	2	1.09861
000565	2019-12-31	1	1	S5204	截至报告期末累计获得	12	2.56495
000565	2020-12-31	1	1	S5201	已申请	5	1.79176
000565	2020-12-31	1	1	S5202	已获得	3	1.38629
000565	2020-12-31	1	1	S5204	截至报告期末累计获得	14	2.70805
000565	2021-12-31	1	1	S5201	已申请		0
000565	2021-12-31	1	1	S5206	截止报告期末累计已授权		0
000565	2021-12-31	1	1	S5203	已授权	1	0.693147
000565	2022-12-31	1	1	S5201	已申请	4	1.60944
000565	2022-12-31	1	1	S5203	已授权	1	0.693147
000565	2022-12-31	1	1	S5206	截止报告期末累计已授权	16	2.83321
000565	2023-12-31	1	1	S5201	已申请	4	1.60944
000565	2023-12-31	1	1	S5203	已授权	1	0.693147
000565	2023-12-31	1	1	S5206	截止报告期末累计已授权	17	2.89037
000566	2013-12-31	1	1	S5203	已授权		0
000566	2013-12-31	1	1	S5201	已申请	5	1.79176
000566	2013-12-31	1	1	S5204	截至报告期末累计获得	16	2.83321
000566	2014-12-31	1	1	S5201	已申请	7	2.07944
000566	2014-12-31	1	1	S5202	已获得	3	1.38629
000566	2014-12-31	1	1	S5204	截至报告期末累计获得	19	2.99573
000566	2015-12-31	1	1	S5204	截至报告期末累计获得	28	3.3673
000566	2016-12-31	1	1	S5204	截至报告期末累计获得		0
000566	2016-12-31	1	1	S5202	已获得	3	1.38629
000566	2017-12-31	1	1	S5201	已申请	2	1.09861
000566	2017-12-31	1	1	S5202	已获得	1	0.693147
000566	2019-12-31	1	1	S5203	已授权		0
000566	2019-12-31	1	1	S5204	截至报告期末累计获得	17	2.89037
000568	2022-12-31	1	1	S5205	截止报告期末累计已被受理		0
000568	2022-12-31	1	1	S5206	截止报告期末累计已授权		0
000568	2023-12-31	1	1	S5201	已申请		0
000568	2023-12-31	1	1	S5206	截止报告期末累计已授权	188	5.24175
000570	2016-12-31	1	1	S5206	截止报告期末累计已授权	6	1.94591
000570	2017-12-31	1	1	S5206	截止报告期末累计已授权	11	2.48491
000570	2017-12-31	1	1	S5201	已申请		0
000570	2017-12-31	1	1	S5203	已授权		0
000570	2018-12-31	1	1	S5206	截止报告期末累计已授权	14	2.70805
000570	2019-12-31	1	1	S5201	已申请		0
000570	2019-12-31	1	1	S5203	已授权		0
000570	2019-12-31	1	1	S5206	截止报告期末累计已授权	12	2.56495
000570	2020-12-31	1	1	S5201	已申请		0
000570	2020-12-31	1	1	S5203	已授权		0
000570	2020-12-31	1	1	S5206	截止报告期末累计已授权	13	2.63906
000570	2021-12-31	1	1	S5201	已申请		0
000570	2021-12-31	1	1	S5203	已授权		0
000570	2021-12-31	1	1	S5206	截止报告期末累计已授权	12	2.56495
000570	2022-12-31	1	1	S5203	已授权		0
000570	2022-12-31	1	1	S5206	截止报告期末累计已授权	13	2.63906
000570	2023-12-31	1	1	S5203	已授权		0
000570	2023-12-31	1	1	S5206	截止报告期末累计已授权	13	2.63906
000572	2022-12-31	1	1	S5205	截止报告期末累计已被受理		0
000572	2022-12-31	1	2	S5205	截止报告期末累计已被受理		0
000572	2023-12-31	1	1	S5205	截止报告期末累计已被受理		0
000572	2023-12-31	1	2	S5205	截止报告期末累计已被受理		0
000576	2015-12-31	1	1	S5201	已申请	3	1.38629
000576	2015-12-31	1	1	S5202	已获得	2	1.09861
000576	2015-12-31	1	1	S5204	截至报告期末累计获得	2	1.09861
000576	2017-12-31	1	1	S5202	已获得	1	0.693147
000584	2017-12-31	1	1	S5204	截至报告期末累计获得	2	1.09861
000584	2018-12-31	1	1	S5205	截止报告期末累计已被受理		0
000584	2019-12-31	1	1	S5203	已授权		0
000584	2019-12-31	1	1	S5204	截至报告期末累计获得	11	2.48491
000584	2020-12-31	1	1	S5203	已授权		0
000584	2020-12-31	1	1	S5206	截止报告期末累计已授权	15	2.77259
000584	2021-12-31	1	1	S5202	已获得		0
000584	2021-12-31	1	1	S5206	截止报告期末累计已授权	5	1.79176
000584	2023-12-31	1	1	S5206	截止报告期末累计已授权	292	5.68017
000586	2016-12-31	1	1	S5201	已申请		0
000586	2019-12-31	1	1	S5203	已授权		0
000586	2021-12-31	1	1	S5203	已授权		0
000587	2013-12-31	1	1	S5203	已授权	0	0
000587	2016-12-31	1	1	S5204	截至报告期末累计获得	3	1.38629
000587	2017-12-31	1	1	S5204	截至报告期末累计获得	3	1.38629
000587	2019-12-31	1	1	S5204	截至报告期末累计获得	4	1.60944
000589	2013-12-31	1	1	S5204	截至报告期末累计获得	3	1.38629
000589	2014-12-31	1	1	S5203	已授权	4	1.60944
000589	2014-12-31	1	1	S5206	截止报告期末累计已授权	7	2.07944
000589	2015-12-31	1	1	S5203	已授权	1	0.693147
000589	2015-12-31	1	1	S5206	截止报告期末累计已授权	9	2.30259
000589	2016-12-31	1	1	S5203	已授权		0
000589	2016-12-31	1	1	S5206	截止报告期末累计已授权	9	2.30259
000589	2017-12-31	1	1	S5206	截止报告期末累计已授权	9	2.30259
000589	2018-12-31	1	1	S5204	截至报告期末累计获得	9	2.30259
000589	2019-12-31	1	1	S5204	截至报告期末累计获得	10	2.3979
000589	2020-12-31	1	1	S5204	截至报告期末累计获得	9	2.30259
000589	2021-12-31	1	1	S5204	截至报告期末累计获得	8	2.19722
000589	2022-12-31	1	1	S5204	截至报告期末累计获得	12	2.56495
000589	2023-12-31	1	1	S5204	截至报告期末累计获得	16	2.83321
000590	2013-12-31	1	1	S5204	截至报告期末累计获得		0
000590	2014-12-31	1	1	S5204	截至报告期末累计获得	6	1.94591
000590	2018-12-31	1	1	S5201	已申请		0
000590	2018-12-31	1	1	S5203	已授权		0
000590	2019-12-31	1	1	S5201	已申请		0
000590	2019-12-31	1	1	S5203	已授权		0
000590	2023-12-31	1	1	S5204	截至报告期末累计获得		0
000595	2014-12-31	1	1	S5202	已获得		0
000595	2014-12-31	1	1	S5204	截至报告期末累计获得		0
000595	2015-12-31	1	1	S5201	已申请	21	3.09104
000595	2015-12-31	1	1	S5202	已获得	0	0
000595	2015-12-31	1	1	S5204	截至报告期末累计获得	8	2.19722
000595	2016-12-31	1	1	S5204	截至报告期末累计获得		0
000595	2020-12-31	1	1	S5204	截至报告期末累计获得	14	2.70805
000595	2022-12-31	1	1	S5202	已获得		0
000595	2022-12-31	1	1	S5204	截至报告期末累计获得	23	3.17805
000595	2023-12-31	1	1	S5206	截止报告期末累计已授权		0
000596	2018-12-31	1	1	S5201	已申请		0
000596	2019-12-31	1	1	S5206	截止报告期末累计已授权		0
000596	2021-12-31	1	1	S5202	已获得	3	1.38629
000596	2022-12-31	1	1	S5204	截至报告期末累计获得	9	2.30259
000596	2022-12-31	1	1	S5206	截止报告期末累计已授权		0
000596	2023-12-31	1	1	S5203	已授权		0
000597	2014-12-31	1	1	S5201	已申请		0
000597	2014-12-31	1	1	S5203	已授权	13	2.63906
000599	2013-12-31	1	1	S5201	已申请	3	1.38629
000599	2023-12-31	1	1	S5204	截至报告期末累计获得		0
000612	2014-12-31	1	1	S5201	已申请	4	1.60944
000612	2014-12-31	1	1	S5204	截至报告期末累计获得		0
000619	2013-12-31	1	1	S5202	已获得	1	0.693147
000619	2014-12-31	1	1	S5202	已获得	1	0.693147
000619	2015-12-31	1	1	S5202	已获得	2	1.09861
000619	2016-12-31	1	1	S5202	已获得	3	1.38629
000619	2017-12-31	1	1	S5202	已获得	1	0.693147
000619	2018-12-31	1	1	S5202	已获得	1	0.693147
000619	2019-12-31	1	1	S5202	已获得	1	0.693147
000619	2020-12-31	1	1	S5202	已获得	1	0.693147
000619	2021-12-31	1	1	S5202	已获得	1	0.693147
000619	2022-12-31	1	1	S5202	已获得	5	1.79176
000619	2023-12-31	1	1	S5202	已获得	5	1.79176
000623	2017-12-31	1	1	S5204	截至报告期末累计获得		0
000623	2018-12-31	1	1	S5206	截止报告期末累计已授权		0
000625	2015-12-31	1	1	S5201	已申请	455	6.12249
000625	2015-12-31	1	1	S5202	已获得	139	4.94164
000625	2015-12-31	1	1	S5204	截至报告期末累计获得	508	6.23245
000625	2018-12-31	1	1	S5201	已申请	401	5.99645
000625	2018-12-31	1	1	S5204	截至报告期末累计获得	1225	7.11151
000625	2019-12-31	1	1	S5201	已申请	402	5.99894
000625	2019-12-31	1	1	S5204	截至报告期末累计获得	1415	7.25559
000625	2020-12-31	1	1	S5201	已申请	400	5.99396
000625	2020-12-31	1	1	S5204	截至报告期末累计获得	1474	7.29641
000625	2021-12-31	1	1	S5204	截至报告期末累计获得	1633	7.39879
000625	2022-12-31	1	1	S5204	截至报告期末累计获得	2148	7.67276
000625	2023-12-31	1	1	S5204	截至报告期末累计获得	2704	7.90286
000629	2021-12-31	1	1	S5203	已授权	20	3.04452
000630	2013-12-31	1	1	S5203	已授权		0
000630	2014-12-31	1	1	S5203	已授权		0
000630	2015-12-31	1	1	S5203	已授权		0
000630	2019-12-31	1	1	S5203	已授权	18	2.94444
000636	2013-12-31	1	1	S5201	已申请		0
000636	2013-12-31	1	1	S5203	已授权		0
000636	2013-12-31	1	2	S5203	已授权		0
000636	2014-12-31	1	1	S5201	已申请	40	3.71357
000636	2014-12-31	1	1	S5203	已授权		0
000636	2014-12-31	1	2	S5203	已授权	2	1.09861
000636	2015-12-31	1	1	S5201	已申请		0
000636	2015-12-31	1	1	S5203	已授权		0
000636	2016-12-31	1	1	S5201	已申请		0
000636	2016-12-31	1	1	S5203	已授权		0
000636	2017-12-31	1	1	S5201	已申请	34	3.55535
000636	2017-12-31	1	1	S5203	已授权	30	3.43399
000636	2018-12-31	1	1	S5201	已申请		0
000636	2018-12-31	1	1	S5203	已授权		0
000636	2019-12-31	1	1	S5201	已申请		0
000636	2019-12-31	1	2	S5201	已申请		0
000636	2019-12-31	1	1	S5203	已授权		0
000636	2020-12-31	1	1	S5201	已申请	35	3.58352
000636	2020-12-31	1	2	S5201	已申请		0
000636	2020-12-31	1	1	S5203	已授权	22	3.13549
000636	2020-12-31	1	2	S5202	已获得	1	0.693147
000636	2020-12-31	1	2	S5203	已授权	47	3.8712
000636	2021-12-31	1	1	S5206	截止报告期末累计已授权	293	5.68358
000636	2023-12-31	1	1	S5204	截至报告期末累计获得	299	5.70378
000637	2013-12-31	1	1	S5201	已申请		0
000637	2014-12-31	1	1	S5203	已授权		0
000637	2019-12-31	1	1	S5203	已授权		0
000637	2021-12-31	1	1	S5201	已申请	2	1.09861
000637	2022-12-31	1	1	S5201	已申请	2	1.09861
000637	2022-12-31	1	1	S5203	已授权	1	0.693147
000637	2023-12-31	1	1	S5204	截至报告期末累计获得		0
000639	2013-12-31	1	1	S5204	截至报告期末累计获得	5	1.79176
000639	2014-12-31	1	1	S5204	截至报告期末累计获得	7	2.07944
000639	2015-12-31	1	1	S5201	已申请	7	2.07944
000639	2015-12-31	1	1	S5202	已获得	4	1.60944
000639	2015-12-31	1	1	S5204	截至报告期末累计获得	9	2.30259
000639	2020-12-31	1	1	S5204	截至报告期末累计获得	15	2.77259
000639	2021-12-31	1	1	S5202	已获得	16	2.83321
000639	2023-12-31	1	1	S5201	已申请		0
000639	2023-12-31	1	1	S5203	已授权	17	2.89037
000651	2015-12-31	1	1	S5205	截止报告期末累计已被受理	7043	8.85993
000651	2015-12-31	1	1	S5206	截止报告期末累计已授权	937	6.84375
000651	2016-12-31	1	1	S5206	截止报告期末累计已授权		0
000651	2016-12-31	1	1	S5203	已授权	911	6.81564
000651	2016-12-31	1	1	S5201	已申请	3662	8.20604
000651	2017-12-31	1	1	S5201	已申请	4182	8.33878
000651	2017-12-31	1	1	S5203	已授权	1273	7.14992
000651	2018-12-31	1	1	S5205	截止报告期末累计已被受理	22715	10.0308
000651	2018-12-31	1	1	S5201	已申请	7462	8.91771
000651	2018-12-31	1	1	S5203	已授权	1834	7.5148
000651	2019-12-31	2	1	S5205	截止报告期末累计已被受理	31500	10.3578
000651	2019-12-31	2	1	S5201	已申请	8860	9.08941
000651	2019-12-31	2	1	S5203	已授权	1739	7.46164
000651	2020-12-31	2	1	S5205	截止报告期末累计已被受理	40195	10.6015
000651	2020-12-31	2	1	S5201	已申请	8793	9.08182
000651	2020-12-31	2	1	S5203	已授权	2743	7.91717
000651	2021-12-31	1	1	S5205	截止报告期末累计已被受理	49529	10.8103
000651	2021-12-31	1	1	S5206	截止报告期末累计已授权	13507	9.51104
000651	2021-12-31	1	1	S5201	已申请	8214	9.01372
000651	2021-12-31	1	1	S5203	已授权	3008	8.00936
000651	2021-12-31	1	2	S5203	已授权	120	4.79579
000651	2022-12-31	1	1	S5201	已申请	7508	8.92386
000651	2022-12-31	1	1	S5203	已授权	3270	8.09285
000651	2023-12-31	1	1	S5205	截止报告期末累计已被受理	64174	11.0694
000651	2023-12-31	1	1	S5206	截止报告期末累计已授权	20416	9.92412
000657	2013-12-31	1	1	S5203	已授权		0
000657	2013-12-31	1	1	S5206	截止报告期末累计已授权		0
000657	2014-12-31	1	1	S5201	已申请	82	4.41884
000657	2014-12-31	1	1	S5203	已授权	22	3.13549
000657	2014-12-31	1	1	S5204	截至报告期末累计获得	241	5.48894
000657	2015-12-31	1	1	S5201	已申请		0
000657	2015-12-31	1	1	S5203	已授权	49	3.91202
000657	2015-12-31	1	2	S5201	已申请		0
000657	2015-12-31	1	2	S5203	已授权		0
000657	2016-12-31	1	1	S5201	已申请	51	3.95124
000657	2016-12-31	1	1	S5203	已授权	67	4.21951
000657	2017-12-31	1	1	S5201	已申请	73	4.30407
000657	2017-12-31	1	1	S5203	已授权	70	4.26268
000657	2017-12-31	1	1	S5204	截至报告期末累计获得	422	6.04737
000657	2017-12-31	1	2	S5206	截止报告期末累计已授权		0
000657	2018-12-31	1	1	S5201	已申请	89	4.49981
000657	2018-12-31	1	1	S5203	已授权	27	3.3322
000657	2018-12-31	1	1	S5204	截至报告期末累计获得	449	6.10925
000657	2018-12-31	1	2	S5206	截止报告期末累计已授权		0
000657	2019-12-31	1	1	S5201	已申请	31	3.46574
000657	2019-12-31	1	1	S5203	已授权	24	3.21888
000657	2019-12-31	1	1	S5204	截至报告期末累计获得	464	6.14204
000657	2019-12-31	1	2	S5204	截至报告期末累计获得		0
000657	2020-12-31	1	1	S5201	已申请	70	4.26268
000657	2020-12-31	1	1	S5203	已授权	45	3.82864
000657	2020-12-31	1	1	S5204	截至报告期末累计获得	536	6.286
000657	2020-12-31	1	2	S5206	截止报告期末累计已授权		0
000657	2021-12-31	1	1	S5201	已申请	92	4.5326
000657	2021-12-31	1	1	S5203	已授权	49	3.91202
000657	2021-12-31	1	1	S5204	截至报告期末累计获得	571	6.34914
000657	2021-12-31	1	2	S5204	截至报告期末累计获得		0
000657	2022-12-31	1	1	S5201	已申请	99	4.60517
000657	2022-12-31	1	1	S5203	已授权	66	4.20469
000657	2022-12-31	1	1	S5204	截至报告期末累计获得	618	6.42811
000657	2023-12-31	1	1	S5203	已授权		0
000657	2023-12-31	1	1	S5204	截至报告期末累计获得		0
000661	2015-12-31	1	1	S5201	已申请	19	2.99573
000661	2015-12-31	1	1	S5202	已获得	15	2.77259
000661	2015-12-31	1	1	S5204	截至报告期末累计获得	60	4.11087
000663	2013-12-31	1	1	S5204	截至报告期末累计获得	3	1.38629
000663	2015-12-31	1	1	S5204	截至报告期末累计获得	6	1.94591
000663	2021-12-31	1	1	S5204	截至报告期末累计获得	20	3.04452
000663	2022-12-31	1	1	S5204	截至报告期末累计获得	23	3.17805
000663	2023-12-31	1	1	S5204	截至报告期末累计获得	26	3.29584
000670	2015-12-31	1	1	S5204	截至报告期末累计获得		0
000670	2015-12-31	1	1	S5205	截止报告期末累计已被受理		0
000670	2016-12-31	1	1	S5204	截至报告期末累计获得		0
000670	2016-12-31	1	1	S5205	截止报告期末累计已被受理		0
000670	2017-12-31	1	1	S5204	截至报告期末累计获得		0
000670	2017-12-31	1	1	S5205	截止报告期末累计已被受理		0
000670	2018-12-31	1	1	S5204	截至报告期末累计获得		0
000677	2013-12-31	1	1	S5201	已申请	8	2.19722
000677	2013-12-31	1	1	S5203	已授权	5	1.79176
000677	2014-12-31	1	1	S5201	已申请	7	2.07944
000677	2014-12-31	1	1	S5203	已授权	7	2.07944
000677	2015-12-31	1	1	S5201	已申请	15	2.77259
000677	2015-12-31	1	1	S5202	已获得	13	2.63906
000677	2015-12-31	1	1	S5204	截至报告期末累计获得	60	4.11087
000677	2017-12-31	1	1	S5201	已申请	1	0.693147
000677	2017-12-31	1	1	S5203	已授权		0
000677	2018-12-31	1	1	S5201	已申请	1	0.693147
000677	2020-12-31	1	1	S5206	截止报告期末累计已授权		0
000678	2013-12-31	1	1	S5201	已申请		0
000678	2013-12-31	1	1	S5203	已授权	1	0.693147
000678	2014-12-31	1	1	S5201	已申请	6	1.94591
000678	2014-12-31	1	1	S5203	已授权		0
000678	2017-12-31	1	1	S5203	已授权	3	1.38629
000678	2017-12-31	1	1	S5204	截至报告期末累计获得	13	2.63906
000678	2019-12-31	1	1	S5201	已申请		0
000678	2019-12-31	1	1	S5203	已授权		0
000678	2021-12-31	1	1	S5203	已授权		0
000678	2022-12-31	1	1	S5201	已申请		0
000678	2022-12-31	1	1	S5203	已授权		0
000678	2023-12-31	1	1	S5203	已授权		0
000680	2013-12-31	1	1	S5201	已申请		0
000680	2013-12-31	1	1	S5203	已授权	23	3.17805
000680	2013-12-31	1	1	S5204	截至报告期末累计获得		0
000680	2014-12-31	1	1	S5201	已申请		0
000680	2014-12-31	1	1	S5203	已授权	12	2.56495
000680	2014-12-31	1	1	S5204	截至报告期末累计获得		0
000680	2015-12-31	1	1	S5204	截至报告期末累计获得		0
000680	2015-12-31	1	1	S5201	已申请		0
000680	2015-12-31	1	1	S5203	已授权	27	3.3322
000680	2016-12-31	1	1	S5204	截至报告期末累计获得		0
000680	2016-12-31	1	1	S5201	已申请		0
000680	2016-12-31	1	1	S5203	已授权	19	2.99573
000680	2017-12-31	1	1	S5204	截至报告期末累计获得		0
000680	2017-12-31	1	1	S5201	已申请		0
000680	2017-12-31	1	1	S5203	已授权	14	2.70805
000680	2017-12-31	1	2	S5203	已授权	1	0.693147
000680	2018-12-31	1	1	S5201	已申请	36	3.61092
000680	2018-12-31	1	1	S5203	已授权		0
000680	2019-12-31	1	1	S5201	已申请	35	3.58352
000680	2019-12-31	1	1	S5203	已授权	11	2.48491
000680	2020-12-31	1	1	S5201	已申请	29	3.4012
000680	2020-12-31	1	1	S5203	已授权	17	2.89037
000683	2015-12-31	1	1	S5204	截至报告期末累计获得	3	1.38629
000683	2019-12-31	1	1	S5202	已获得	2	1.09861
000683	2019-12-31	1	1	S5204	截至报告期末累计获得	2	1.09861
000683	2020-12-31	1	1	S5206	截止报告期末累计已授权	12	2.56495
000683	2020-12-31	1	1	S5204	截至报告期末累计获得	12	2.56495
000683	2021-12-31	1	1	S5204	截至报告期末累计获得	12	2.56495
000687	2013-12-31	1	1	S5204	截至报告期末累计获得	10	2.3979
000687	2014-12-31	1	1	S5204	截至报告期末累计获得	9	2.30259
000687	2015-12-31	1	1	S5204	截至报告期末累计获得	47	3.8712
000687	2015-12-31	1	1	S5206	截止报告期末累计已授权		0
000687	2016-12-31	1	1	S5205	截止报告期末累计已被受理		0
000687	2016-12-31	1	1	S5206	截止报告期末累计已授权	5	1.79176
000687	2017-12-31	1	1	S5205	截止报告期末累计已被受理		0
000687	2017-12-31	1	1	S5206	截止报告期末累计已授权	10	2.3979
000687	2018-12-31	1	1	S5205	截止报告期末累计已被受理		0
000687	2018-12-31	1	1	S5206	截止报告期末累计已授权	11	2.48491
000687	2019-12-31	1	1	S5205	截止报告期末累计已被受理		0
000687	2019-12-31	1	1	S5206	截止报告期末累计已授权	62	4.14313
000687	2020-12-31	1	1	S5205	截止报告期末累计已被受理		0
000687	2020-12-31	1	1	S5206	截止报告期末累计已授权	62	4.14313
000691	2020-12-31	1	1	S5204	截至报告期末累计获得	2	1.09861
000691	2021-12-31	1	1	S5204	截至报告期末累计获得	2	1.09861
000691	2022-12-31	1	1	S5202	已获得	3	1.38629
000691	2023-12-31	1	1	S5204	截至报告期末累计获得	3	1.38629
000698	2016-12-31	1	1	S5205	截止报告期末累计已被受理	6	1.94591
000698	2016-12-31	1	1	S5206	截止报告期末累计已授权	6	1.94591
000703	2017-12-31	1	1	S5201	已申请	14	2.70805
000703	2018-12-31	1	1	S5201	已申请	16	2.83321
000703	2018-12-31	1	1	S5203	已授权	3	1.38629
000703	2019-12-31	1	1	S5201	已申请	49	3.91202
000703	2019-12-31	1	1	S5203	已授权	5	1.79176
000703	2019-12-31	1	1	S5206	截止报告期末累计已授权	50	3.93183
000703	2019-12-31	1	1	S5205	截止报告期末累计已被受理	137	4.92725
000703	2020-12-31	1	1	S5201	已申请	113	4.7362
000703	2020-12-31	1	1	S5203	已授权	8	2.19722
000703	2021-12-31	1	1	S5205	截止报告期末累计已被受理		0
000703	2021-12-31	1	1	S5206	截止报告期末累计已授权	108	4.69135
000703	2022-12-31	1	1	S5205	截止报告期末累计已被受理		0
000703	2022-12-31	1	1	S5206	截止报告期末累计已授权	203	5.31812
000703	2023-12-31	1	1	S5206	截止报告期末累计已授权	262	5.57215
000708	2013-12-31	1	1	S5203	已授权		0
000708	2014-12-31	1	1	S5203	已授权	3	1.38629
000708	2015-12-31	1	1	S5201	已申请	7	2.07944
000708	2015-12-31	1	1	S5202	已获得	7	2.07944
000708	2015-12-31	1	1	S5204	截至报告期末累计获得	7	2.07944
000708	2016-12-31	1	1	S5203	已授权	2	1.09861
000708	2017-12-31	1	1	S5203	已授权	3	1.38629
000708	2018-12-31	1	1	S5201	已申请	35	3.58352
000708	2018-12-31	1	1	S5203	已授权		0
000708	2019-12-31	1	1	S5203	已授权		0
000708	2019-12-31	1	1	S5206	截止报告期末累计已授权	166	5.11799
000708	2019-12-31	1	2	S5206	截止报告期末累计已授权	1	0.693147
000708	2020-12-31	1	1	S5203	已授权	45	3.82864
000708	2020-12-31	1	1	S5206	截止报告期末累计已授权	218	5.38907
000708	2020-12-31	1	2	S5206	截止报告期末累计已授权	4	1.60944
000708	2021-12-31	1	1	S5203	已授权	72	4.29046
000708	2021-12-31	1	1	S5206	截止报告期末累计已授权	284	5.65249
000708	2021-12-31	1	2	S5206	截止报告期末累计已授权	5	1.79176
000708	2022-12-31	1	1	S5203	已授权	107	4.68213
000708	2022-12-31	1	1	S5206	截止报告期末累计已授权	391	5.97126
000708	2022-12-31	1	2	S5206	截止报告期末累计已授权	6	1.94591
000708	2023-12-31	1	1	S5203	已授权	122	4.81218
000709	2013-12-31	1	1	S5201	已申请		0
000709	2014-12-31	1	1	S5201	已申请		0
000709	2014-12-31	1	1	S5202	已获得		0
000709	2015-12-31	1	1	S5201	已申请	186	5.23111
000709	2016-12-31	1	1	S5201	已申请		0
000709	2016-12-31	1	1	S5203	已授权		0
000709	2017-12-31	1	1	S5201	已申请	320	5.77144
000709	2017-12-31	1	1	S5203	已授权		0
000709	2018-12-31	1	1	S5201	已申请	400	5.99396
000709	2018-12-31	1	1	S5203	已授权		0
000709	2019-12-31	1	1	S5201	已申请		0
000709	2019-12-31	1	1	S5203	已授权		0
000709	2020-12-31	1	1	S5201	已申请		0
000717	2016-12-31	1	1	S5205	截止报告期末累计已被受理	20	3.04452
000717	2017-12-31	1	1	S5201	已申请	25	3.2581
000717	2019-12-31	1	1	S5201	已申请	130	4.8752
000717	2020-12-31	1	1	S5201	已申请	280	5.63835
000717	2020-12-31	1	1	S5203	已授权	11	2.48491
000717	2020-12-31	1	1	S5204	截至报告期末累计获得	60	4.11087
000717	2021-12-31	1	1	S5201	已申请	391	5.97126
000717	2023-12-31	1	1	S5204	截至报告期末累计获得	500	6.21661
000725	2013-12-31	1	1	S5201	已申请		0
000725	2014-12-31	1	1	S5201	已申请		0
000725	2015-12-31	1	1	S5201	已申请		0
000725	2016-12-31	1	1	S5201	已申请		0
000725	2017-12-31	1	1	S5201	已申请		0
000725	2017-12-31	1	2	S5203	已授权		0
000725	2017-12-31	1	2	S5201	已申请		0
000725	2018-12-31	1	1	S5201	已申请		0
000725	2023-12-31	1	1	S5205	截止报告期末累计已被受理		0
000725	2023-12-31	1	1	S5206	截止报告期末累计已授权		0
000726	2013-12-31	1	1	S5201	已申请	9	2.30259
000726	2013-12-31	1	1	S5203	已授权	2	1.09861
000726	2014-12-31	1	1	S5205	截止报告期末累计已被受理	62	4.14313
000726	2014-12-31	1	2	S5205	截止报告期末累计已被受理	3	1.38629
000726	2014-12-31	1	1	S5206	截止报告期末累计已授权		0
000726	2015-12-31	1	1	S5201	已申请		0
000726	2015-12-31	1	1	S5205	截止报告期末累计已被受理		0
000726	2015-12-31	1	1	S5206	截止报告期末累计已授权		0
000726	2016-12-31	1	1	S5204	截至报告期末累计获得		0
000726	2017-12-31	1	1	S5203	已授权		0
000726	2017-12-31	1	1	S5206	截止报告期末累计已授权		0
000726	2018-12-31	1	1	S5206	截止报告期末累计已授权		0
000726	2020-12-31	1	1	S5203	已授权		0
000726	2021-12-31	1	1	S5203	已授权	16	2.83321
000726	2022-12-31	1	1	S5203	已授权	21	3.09104
000726	2023-12-31	1	1	S5203	已授权	53	3.98898
000727	2013-12-31	1	1	S5201	已申请	11	2.48491
000727	2013-12-31	1	1	S5203	已授权	2	1.09861
000727	2014-12-31	1	1	S5201	已申请	14	2.70805
000727	2014-12-31	1	1	S5203	已授权	2	1.09861
000727	2015-12-31	1	1	S5202	已获得	12	2.56495
000727	2016-12-31	1	1	S5205	截止报告期末累计已被受理		0
000727	2016-12-31	1	1	S5206	截止报告期末累计已授权	7	2.07944
000727	2016-12-31	1	1	S5201	已申请	5	1.79176
000727	2017-12-31	1	1	S5203	已授权		0
000727	2017-12-31	1	1	S5204	截至报告期末累计获得	8	2.19722
000727	2017-12-31	1	1	S5202	已获得		0
000727	2018-12-31	1	1	S5201	已申请	99	4.60517
000727	2018-12-31	1	2	S5201	已申请		0
000727	2018-12-31	1	1	S5202	已获得		0
000727	2019-12-31	1	1	S5201	已申请	128	4.85981
000727	2019-12-31	1	2	S5201	已申请		0
000727	2023-12-31	1	1	S5204	截至报告期末累计获得		0
000731	2013-12-31	1	1	S5203	已授权		0
000731	2013-12-31	1	1	S5204	截至报告期末累计获得		0
000731	2014-12-31	1	1	S5203	已授权	5	1.79176
000731	2014-12-31	1	1	S5204	截至报告期末累计获得		0
000731	2015-12-31	1	1	S5201	已申请		0
000731	2015-12-31	1	1	S5203	已授权		0
000731	2015-12-31	1	1	S5206	截止报告期末累计已授权		0
000731	2016-12-31	1	1	S5204	截至报告期末累计获得	2	1.09861
000731	2016-12-31	1	1	S5203	已授权		0
000731	2017-12-31	1	1	S5201	已申请	2	1.09861
000731	2017-12-31	1	1	S5203	已授权	3	1.38629
000731	2017-12-31	1	1	S5206	截止报告期末累计已授权		0
000731	2018-12-31	1	1	S5201	已申请	2	1.09861
000731	2018-12-31	1	1	S5203	已授权	2	1.09861
000731	2018-12-31	1	1	S5206	截止报告期末累计已授权		0
000731	2019-12-31	1	1	S5202	已获得	2	1.09861
000731	2019-12-31	1	1	S5203	已授权		0
000731	2019-12-31	1	1	S5204	截至报告期末累计获得	19	2.99573
000731	2020-12-31	1	1	S5201	已申请		0
000731	2020-12-31	1	1	S5204	截至报告期末累计获得	19	2.99573
000731	2021-12-31	1	1	S5204	截至报告期末累计获得	21	3.09104
000731	2022-12-31	1	1	S5203	已授权		0
000731	2022-12-31	1	1	S5204	截至报告期末累计获得	21	3.09104
000731	2023-12-31	1	1	S5204	截至报告期末累计获得	20	3.04452
000731	2023-12-31	1	1	S5203	已授权	2	1.09861
000733	2013-12-31	1	1	S5201	已申请	74	4.31749
000733	2013-12-31	1	1	S5203	已授权	10	2.3979
000733	2013-12-31	1	1	S5204	截至报告期末累计获得	43	3.78419
000733	2014-12-31	1	1	S5201	已申请	60	4.11087
000733	2014-12-31	1	2	S5201	已申请		0
000733	2014-12-31	1	1	S5203	已授权	13	2.63906
000733	2014-12-31	1	1	S5204	截至报告期末累计获得	58	4.07754
000733	2015-12-31	1	1	S5201	已申请	71	4.27667
000733	2015-12-31	1	1	S5203	已授权	30	3.43399
000733	2015-12-31	1	1	S5204	截至报告期末累计获得	90	4.51086
000733	2016-12-31	1	1	S5201	已申请	88	4.48864
000733	2016-12-31	1	1	S5202	已获得	65	4.18965
000733	2016-12-31	1	1	S5204	截至报告期末累计获得	157	5.0626
000733	2017-12-31	1	1	S5201	已申请	115	4.75359
000733	2017-12-31	1	2	S5201	已申请		0
000733	2017-12-31	1	1	S5203	已授权	48	3.89182
000733	2017-12-31	1	1	S5204	截至报告期末累计获得	214	5.37064
000733	2018-12-31	1	1	S5201	已申请	117	4.77068
000733	2018-12-31	1	1	S5203	已授权	55	4.02535
000733	2018-12-31	1	1	S5204	截至报告期末累计获得	270	5.60212
000733	2019-12-31	1	1	S5201	已申请	92	4.5326
000733	2019-12-31	1	1	S5203	已授权	46	3.85015
000733	2019-12-31	1	1	S5204	截至报告期末累计获得	309	5.73657
000733	2020-12-31	1	1	S5201	已申请	137	4.92725
000733	2020-12-31	1	1	S5203	已授权	24	3.21888
000733	2020-12-31	1	1	S5204	截至报告期末累计获得	323	5.78074
000733	2021-12-31	1	1	S5201	已申请	162	5.09375
000733	2021-12-31	1	1	S5203	已授权	27	3.3322
000733	2021-12-31	1	1	S5204	截至报告期末累计获得	359	5.8861
000733	2022-12-31	1	1	S5201	已申请	146	4.99043
000733	2022-12-31	1	1	S5203	已授权	51	3.95124
000733	2022-12-31	1	1	S5204	截至报告期末累计获得	394	5.97889
000733	2023-12-31	1	1	S5201	已申请	187	5.23644
000733	2023-12-31	1	1	S5203	已授权	56	4.04305
000733	2023-12-31	1	1	S5204	截至报告期末累计获得	453	6.1181
000737	2013-12-31	1	1	S5201	已申请	6	1.94591
000737	2013-12-31	1	1	S5203	已授权	2	1.09861
000737	2014-12-31	1	1	S5201	已申请	17	2.89037
000737	2014-12-31	1	1	S5203	已授权	3	1.38629
000737	2015-12-31	1	1	S5201	已申请	2	1.09861
000737	2015-12-31	1	1	S5202	已获得	1	0.693147
000737	2015-12-31	1	1	S5204	截至报告期末累计获得	16	2.83321
000737	2016-12-31	1	1	S5203	已授权		0
000737	2017-12-31	1	1	S5206	截止报告期末累计已授权	20	3.04452
000737	2017-12-31	1	1	S5205	截止报告期末累计已被受理	20	3.04452
000737	2017-12-31	1	1	S5203	已授权		0
000737	2018-12-31	1	1	S5201	已申请	7	2.07944
000737	2018-12-31	1	1	S5204	截至报告期末累计获得	8	2.19722
000737	2019-12-31	1	1	S5201	已申请	3	1.38629
000737	2019-12-31	1	1	S5203	已授权	1	0.693147
000737	2019-12-31	1	1	S5204	截至报告期末累计获得	9	2.30259
000737	2020-12-31	1	1	S5201	已申请	8	2.19722
000737	2020-12-31	1	1	S5203	已授权	1	0.693147
000737	2020-12-31	1	1	S5204	截至报告期末累计获得	11	2.48491
000737	2021-12-31	1	1	S5203	已授权		0
000737	2023-12-31	1	1	S5203	已授权		0
000738	2013-12-31	1	1	S5201	已申请		0
000738	2014-12-31	1	1	S5201	已申请	110	4.70953
000738	2014-12-31	1	1	S5203	已授权	45	3.82864
000738	2016-12-31	1	1	S5201	已申请	99	4.60517
000738	2016-12-31	1	1	S5203	已授权	34	3.55535
000738	2017-12-31	1	1	S5201	已申请	110	4.70953
000738	2017-12-31	1	1	S5203	已授权	67	4.21951
000738	2018-12-31	1	1	S5202	已获得	234	5.45959
000738	2018-12-31	1	1	S5201	已申请	126	4.84419
000738	2018-12-31	1	1	S5203	已授权	32	3.49651
000738	2019-12-31	1	1	S5202	已获得	308	5.73334
000738	2019-12-31	1	1	S5201	已申请	121	4.80402
000738	2019-12-31	1	1	S5203	已授权	79	4.38203
000738	2020-12-31	1	1	S5202	已获得	326	5.78996
000738	2020-12-31	1	1	S5201	已申请	129	4.86753
000738	2020-12-31	1	1	S5203	已授权	97	4.58497
000738	2021-12-31	1	1	S5201	已申请	135	4.91265
000738	2021-12-31	1	1	S5203	已授权	51	3.95124
000738	2021-12-31	1	1	S5202	已获得	385	5.95584
000738	2022-12-31	1	1	S5202	已获得	50	3.93183
000738	2022-12-31	1	1	S5201	已申请	143	4.96981
000738	2022-12-31	1	1	S5203	已授权	50	3.93183
000738	2023-12-31	1	1	S5202	已获得	121	4.80402
000739	2013-12-31	1	1	S5201	已申请	11	2.48491
000739	2016-12-31	1	1	S5203	已授权		0
000739	2017-12-31	1	1	S5204	截至报告期末累计获得	103	4.64439
000739	2018-12-31	1	1	S5203	已授权	12	2.56495
000739	2018-12-31	1	1	S5204	截至报告期末累计获得	98	4.59512
000739	2019-12-31	1	1	S5204	截至报告期末累计获得	137	4.92725
000739	2019-12-31	1	1	S5202	已获得	5	1.79176
000739	2020-12-31	1	1	S5204	截至报告期末累计获得	100	4.61512
000739	2020-12-31	1	1	S5201	已申请	13	2.63906
000739	2020-12-31	1	1	S5203	已授权	4	1.60944
000739	2021-12-31	1	1	S5203	已授权	13	2.63906
000739	2021-12-31	1	1	S5204	截至报告期末累计获得	113	4.7362
000739	2021-12-31	1	1	S5201	已申请	14	2.70805
000739	2022-12-31	1	1	S5204	截至报告期末累计获得	129	4.86753
000739	2022-12-31	1	1	S5203	已授权	17	2.89037
000739	2022-12-31	1	1	S5201	已申请	21	3.09104
000739	2023-12-31	1	1	S5201	已申请	23	3.17805
000739	2023-12-31	1	1	S5203	已授权	5	1.79176
000739	2023-12-31	1	1	S5204	截至报告期末累计获得	128	4.85981
000748	2015-12-31	1	1	S5201	已申请	25	3.2581
000748	2015-12-31	1	1	S5203	已授权	14	2.70805
000751	2017-12-31	1	1	S5201	已申请	2	1.09861
000756	2013-12-31	1	1	S5201	已申请	20	3.04452
000756	2013-12-31	1	1	S5203	已授权	16	2.83321
000756	2014-12-31	1	1	S5203	已授权		0
000756	2015-12-31	1	1	S5203	已授权	15	2.77259
000756	2016-12-31	1	1	S5203	已授权	8	2.19722
000756	2017-12-31	1	1	S5203	已授权		0
000756	2018-12-31	1	1	S5203	已授权		0
000756	2018-12-31	1	1	S5201	已申请		0
000756	2019-12-31	1	1	S5201	已申请		0
000756	2019-12-31	1	1	S5203	已授权		0
000756	2020-12-31	1	1	S5203	已授权		0
000756	2021-12-31	1	1	S5203	已授权		0
000756	2022-12-31	1	1	S5203	已授权		0
000756	2023-12-31	1	1	S5203	已授权		0
000760	2015-12-31	1	1	S5201	已申请	38	3.66356
000760	2015-12-31	1	1	S5202	已获得	15	2.77259
000760	2015-12-31	1	1	S5204	截至报告期末累计获得	29	3.4012
000761	2013-12-31	1	1	S5201	已申请		0
000761	2013-12-31	1	1	S5203	已授权		0
000761	2016-12-31	1	1	S5201	已申请	81	4.40672
000761	2016-12-31	1	2	S5201	已申请		0
000761	2016-12-31	1	1	S5203	已授权	11	2.48491
000761	2017-12-31	1	1	S5203	已授权	6	1.94591
000761	2017-12-31	1	1	S5201	已申请	6	1.94591
000761	2018-12-31	1	1	S5203	已授权	15	2.77259
000761	2019-12-31	1	1	S5201	已申请		0
000761	2019-12-31	1	1	S5203	已授权		0
000761	2020-12-31	1	1	S5201	已申请		0
000761	2020-12-31	1	1	S5203	已授权	16	2.83321
000761	2021-12-31	1	1	S5201	已申请	107	4.68213
000761	2021-12-31	1	1	S5203	已授权	30	3.43399
000761	2022-12-31	1	1	S5201	已申请		0
000761	2022-12-31	1	1	S5203	已授权	31	3.46574
000761	2023-12-31	1	1	S5205	截止报告期末累计已被受理		0
000761	2023-12-31	1	2	S5205	截止报告期末累计已被受理		0
000761	2023-12-31	1	1	S5206	截止报告期末累计已授权	82	4.41884
000766	2013-12-31	1	1	S5201	已申请		0
000766	2013-12-31	1	1	S5202	已获得	4	1.60944
000766	2014-12-31	1	1	S5204	截至报告期末累计获得		0
000766	2014-12-31	1	1	S5205	截止报告期末累计已被受理		0
000766	2015-12-31	1	1	S5201	已申请		0
000766	2015-12-31	1	1	S5202	已获得		0
000766	2016-12-31	1	1	S5204	截至报告期末累计获得	25	3.2581
000766	2017-12-31	1	1	S5204	截至报告期末累计获得	30	3.43399
000766	2017-12-31	1	1	S5205	截止报告期末累计已被受理	7	2.07944
000766	2018-12-31	1	1	S5204	截至报告期末累计获得	41	3.73767
000766	2019-12-31	1	1	S5204	截至报告期末累计获得	53	3.98898
000766	2019-12-31	1	1	S5205	截止报告期末累计已被受理	14	2.70805
000766	2020-12-31	1	1	S5202	已获得	42	3.7612
000766	2020-12-31	1	1	S5201	已申请	2	1.09861
000766	2021-12-31	1	1	S5204	截至报告期末累计获得	42	3.7612
000766	2021-12-31	1	1	S5205	截止报告期末累计已被受理	2	1.09861
000766	2022-12-31	1	1	S5204	截至报告期末累计获得	33	3.52636
000766	2022-12-31	1	1	S5205	截止报告期末累计已被受理	14	2.70805
000766	2023-12-31	1	1	S5204	截至报告期末累计获得	38	3.66356
000766	2023-12-31	1	1	S5205	截止报告期末累计已被受理	13	2.63906
000777	2014-12-31	1	1	S5201	已申请	4	1.60944
000777	2014-12-31	1	1	S5203	已授权	2	1.09861
000777	2014-12-31	1	1	S5204	截至报告期末累计获得	4	1.60944
000777	2015-12-31	1	1	S5204	截至报告期末累计获得	4	1.60944
000777	2015-12-31	1	1	S5201	已申请		0
000777	2016-12-31	1	1	S5204	截至报告期末累计获得	8	2.19722
000777	2017-12-31	1	1	S5204	截至报告期末累计获得	9	2.30259
000777	2018-12-31	1	1	S5201	已申请	37	3.63759
000777	2018-12-31	1	1	S5203	已授权	1	0.693147
000777	2019-12-31	1	1	S5201	已申请	31	3.46574
000777	2019-12-31	1	1	S5203	已授权	1	0.693147
000777	2020-12-31	1	1	S5203	已授权	4	1.60944
000777	2023-12-31	1	1	S5204	截至报告期末累计获得		0
000778	2014-12-31	1	1	S5204	截至报告期末累计获得	131	4.8828
000778	2015-12-31	1	1	S5204	截至报告期末累计获得	181	5.20401
000778	2016-12-31	1	1	S5204	截至报告期末累计获得	264	5.57973
000778	2017-12-31	1	1	S5204	截至报告期末累计获得	282	5.64545
000778	2017-12-31	1	2	S5204	截至报告期末累计获得		0
000778	2018-12-31	1	1	S5204	截至报告期末累计获得	343	5.84064
000778	2018-12-31	1	2	S5204	截至报告期末累计获得		0
000778	2019-12-31	1	1	S5204	截至报告期末累计获得	382	5.94803
000778	2019-12-31	1	2	S5204	截至报告期末累计获得		0
000778	2020-12-31	1	1	S5204	截至报告期末累计获得	388	5.96358
000778	2020-12-31	1	2	S5204	截至报告期末累计获得		0
000778	2021-12-31	1	1	S5204	截至报告期末累计获得	406	6.00881
000778	2021-12-31	1	2	S5204	截至报告期末累计获得		0
000778	2022-12-31	1	1	S5204	截至报告期末累计获得	453	6.1181
000778	2022-12-31	1	2	S5204	截至报告期末累计获得	7	2.07944
000778	2023-12-31	1	1	S5204	截至报告期末累计获得	535	6.28413
000778	2023-12-31	1	2	S5206	截止报告期末累计已授权	7	2.07944
000786	2013-12-31	1	2	S5205	截止报告期末累计已被受理		0
000786	2013-12-31	2	1	S5205	截止报告期末累计已被受理		0
000786	2013-12-31	2	1	S5206	截止报告期末累计已授权		0
000786	2014-12-31	1	1	S5201	已申请		0
000786	2014-12-31	1	2	S5201	已申请		0
000786	2014-12-31	1	1	S5203	已授权		0
000786	2014-12-31	1	2	S5203	已授权		0
000786	2015-12-31	1	1	S5201	已申请	191	5.2575
000786	2015-12-31	1	1	S5202	已获得	21	3.09104
000786	2015-12-31	1	2	S5204	截至报告期末累计获得	136	4.91998
000786	2016-12-31	1	1	S5204	截至报告期末累计获得		0
000786	2016-12-31	1	1	S5205	截止报告期末累计已被受理		0
000786	2016-12-31	1	1	S5206	截止报告期末累计已授权		0
000786	2016-12-31	1	2	S5205	截止报告期末累计已被受理		0
000786	2017-12-31	1	1	S5206	截止报告期末累计已授权		0
000786	2017-12-31	1	1	S5205	截止报告期末累计已被受理		0
000786	2017-12-31	1	2	S5205	截止报告期末累计已被受理		0
000786	2017-12-31	1	2	S5201	已申请	5	1.79176
000786	2018-12-31	1	1	S5205	截止报告期末累计已被受理		0
000786	2018-12-31	1	1	S5206	截止报告期末累计已授权		0
000786	2018-12-31	1	2	S5205	截止报告期末累计已被受理		0
000786	2019-12-31	1	1	S5206	截止报告期末累计已授权		0
000786	2019-12-31	1	1	S5205	截止报告期末累计已被受理		0
000786	2019-12-31	1	2	S5205	截止报告期末累计已被受理		0
000786	2020-12-31	1	1	S5206	截止报告期末累计已授权		0
000786	2020-12-31	1	1	S5205	截止报告期末累计已被受理		0
000786	2020-12-31	1	2	S5205	截止报告期末累计已被受理		0
000786	2020-12-31	1	2	S5206	截止报告期末累计已授权		0
000786	2021-12-31	1	1	S5204	截至报告期末累计获得		0
000786	2021-12-31	1	1	S5205	截止报告期末累计已被受理		0
000786	2021-12-31	1	1	S5206	截止报告期末累计已授权		0
000786	2021-12-31	1	2	S5205	截止报告期末累计已被受理		0
000786	2021-12-31	1	2	S5206	截止报告期末累计已授权		0
000786	2022-12-31	1	1	S5205	截止报告期末累计已被受理		0
000786	2022-12-31	1	1	S5206	截止报告期末累计已授权		0
000786	2022-12-31	1	2	S5205	截止报告期末累计已被受理		0
000786	2022-12-31	1	2	S5206	截止报告期末累计已授权		0
000786	2022-12-31	1	1	S5204	截至报告期末累计获得		0
000786	2023-12-31	1	1	S5205	截止报告期末累计已被受理		0
000786	2023-12-31	1	1	S5206	截止报告期末累计已授权		0
000786	2023-12-31	1	2	S5205	截止报告期末累计已被受理		0
000786	2023-12-31	1	2	S5206	截止报告期末累计已授权		0
000786	2023-12-31	1	1	S5201	已申请	349	5.85793
000786	2023-12-31	1	2	S5201	已申请	13	2.63906
000786	2023-12-31	1	1	S5203	已授权	222	5.40717
000786	2023-12-31	1	2	S5203	已授权	5	1.79176
000786	2023-12-31	1	1	S5204	截至报告期末累计获得		0
000789	2021-12-31	1	1	S5202	已获得		0
000789	2022-12-31	1	1	S5202	已获得	2	1.09861
000790	2013-12-31	1	1	S5201	已申请	11	2.48491
000790	2013-12-31	1	1	S5203	已授权	1	0.693147
000790	2013-12-31	1	1	S5205	截止报告期末累计已被受理	7	2.07944
000790	2013-12-31	1	2	S5205	截止报告期末累计已被受理		0
000790	2014-12-31	1	1	S5202	已获得	4	1.60944
000790	2014-12-31	1	1	S5205	截止报告期末累计已被受理	7	2.07944
000790	2014-12-31	1	2	S5205	截止报告期末累计已被受理	3	1.38629
000790	2014-12-31	1	1	S5206	截止报告期末累计已授权	2	1.09861
000790	2015-12-31	1	1	S5204	截至报告期末累计获得	17	2.89037
000790	2016-12-31	1	1	S5204	截至报告期末累计获得	22	3.13549
000790	2017-12-31	1	1	S5204	截至报告期末累计获得	23	3.17805
000790	2018-12-31	1	1	S5204	截至报告期末累计获得	23	3.17805
000790	2019-12-31	1	1	S5204	截至报告期末累计获得	28	3.3673
000790	2020-12-31	1	1	S5204	截至报告期末累计获得	24	3.21888
000790	2020-12-31	1	2	S5204	截至报告期末累计获得	4	1.60944
000790	2020-12-31	1	1	S5202	已获得	2	1.09861
000790	2021-12-31	1	1	S5204	截至报告期末累计获得	27	3.3322
000790	2021-12-31	1	2	S5204	截至报告期末累计获得		0
000790	2021-12-31	1	1	S5201	已申请		0
000790	2021-12-31	1	1	S5203	已授权		0
000790	2022-12-31	1	1	S5205	截止报告期末累计已被受理		0
000790	2022-12-31	1	1	S5206	截止报告期末累计已授权		0
000790	2022-12-31	1	2	S5206	截止报告期末累计已授权	4	1.60944
000790	2023-12-31	1	1	S5205	截止报告期末累计已被受理		0
000790	2023-12-31	1	1	S5206	截止报告期末累计已授权		0
000790	2023-12-31	1	2	S5206	截止报告期末累计已授权	4	1.60944
000790	2023-12-31	1	1	S5201	已申请		0
000790	2023-12-31	1	1	S5203	已授权	3	1.38629
000792	2015-12-31	1	1	S5201	已申请	9	2.30259
000792	2015-12-31	1	1	S5203	已授权	3	1.38629
000792	2016-12-31	1	1	S5201	已申请	8	2.19722
000792	2016-12-31	1	1	S5203	已授权	3	1.38629
000792	2017-12-31	1	1	S5201	已申请	55	4.02535
000792	2017-12-31	1	1	S5203	已授权	10	2.3979
000792	2018-12-31	1	1	S5201	已申请	72	4.29046
000792	2018-12-31	1	1	S5203	已授权	6	1.94591
000792	2019-12-31	1	1	S5201	已申请	39	3.68888
000792	2019-12-31	1	1	S5203	已授权	21	3.09104
000792	2020-12-31	1	1	S5201	已申请		0
000792	2020-12-31	1	1	S5203	已授权	19	2.99573
000792	2021-12-31	1	1	S5201	已申请		0
000792	2021-12-31	1	1	S5203	已授权		0
000792	2023-12-31	1	1	S5202	已获得		0
000795	2013-12-31	1	1	S5201	已申请	16	2.83321
000795	2013-12-31	1	1	S5202	已获得		0
000795	2014-12-31	1	1	S5202	已获得		0
000795	2015-12-31	1	1	S5204	截至报告期末累计获得	28	3.3673
000795	2016-12-31	1	1	S5204	截至报告期末累计获得	27	3.3322
000795	2016-12-31	1	1	S5201	已申请	24	3.21888
000795	2016-12-31	1	2	S5203	已授权		0
000795	2017-12-31	1	2	S5203	已授权	2	1.09861
000795	2017-12-31	1	1	S5203	已授权	3	1.38629
000795	2018-12-31	1	1	S5202	已获得	11	2.48491
000795	2018-12-31	1	2	S5202	已获得	2	1.09861
000795	2019-12-31	1	1	S5204	截至报告期末累计获得	202	5.31321
000795	2020-12-31	1	1	S5201	已申请	114	4.74493
000795	2020-12-31	1	1	S5203	已授权		0
000795	2021-12-31	1	1	S5203	已授权		0
000795	2022-12-31	1	1	S5201	已申请		0
000795	2022-12-31	1	1	S5203	已授权		0
000795	2023-12-31	1	1	S5201	已申请		0
000795	2023-12-31	1	1	S5203	已授权		0
000800	2023-12-31	1	1	S5205	截止报告期末累计已被受理	1200	7.09091
000801	2020-12-31	1	1	S5204	截至报告期末累计获得		0
000806	2015-12-31	1	1	S5202	已获得	2	1.09861
000806	2022-12-31	1	1	S5201	已申请	7	2.07944
000807	2016-12-31	1	1	S5201	已申请		0
000807	2016-12-31	1	1	S5203	已授权		0
000807	2019-12-31	1	1	S5204	截至报告期末累计获得	127	4.85203
000807	2021-12-31	1	1	S5204	截至报告期末累计获得	147	4.99721
000807	2021-12-31	1	1	S5201	已申请	18	2.94444
000807	2021-12-31	1	1	S5203	已授权	13	2.63906
000807	2022-12-31	1	1	S5204	截至报告期末累计获得	154	5.04343
000807	2023-12-31	1	1	S5204	截至报告期末累计获得	168	5.1299
000810	2014-12-31	1	1	S5204	截至报告期末累计获得	93	4.54329
000810	2014-12-31	1	1	S5205	截止报告期末累计已被受理	378	5.93754
000810	2015-12-31	1	1	S5201	已申请	245	5.50533
000810	2015-12-31	1	1	S5202	已获得	129	4.86753
000810	2015-12-31	1	1	S5204	截至报告期末累计获得	129	4.86753
000810	2016-12-31	1	1	S5201	已申请	471	6.15698
000810	2016-12-31	1	1	S5202	已获得	195	5.27811
000810	2016-12-31	1	1	S5204	截至报告期末累计获得	195	5.27811
000810	2017-12-31	1	1	S5204	截至报告期末累计获得	214	5.37064
000810	2018-12-31	1	1	S5204	截至报告期末累计获得	266	5.58725
000810	2019-12-31	1	1	S5205	截止报告期末累计已被受理	715	6.57368
000810	2019-12-31	1	1	S5204	截至报告期末累计获得	364	5.8999
000810	2020-12-31	1	1	S5205	截止报告期末累计已被受理	706	6.56103
000810	2020-12-31	1	1	S5206	截止报告期末累计已授权	378	5.93754
000812	2014-12-31	1	1	S5202	已获得		0
000812	2015-12-31	1	1	S5202	已获得	3	1.38629
000812	2016-12-31	1	1	S5202	已获得	2	1.09861
000812	2017-12-31	1	1	S5202	已获得	4	1.60944
000812	2018-12-31	1	1	S5202	已获得	3	1.38629
000812	2019-12-31	1	1	S5202	已获得	2	1.09861
000812	2020-12-31	1	1	S5202	已获得	7	2.07944
000813	2016-12-31	1	1	S5201	已申请		0
000813	2016-12-31	1	1	S5203	已授权	2	1.09861
000813	2017-12-31	1	1	S5203	已授权	2	1.09861
000813	2017-12-31	1	1	S5206	截止报告期末累计已授权		0
000813	2017-12-31	1	1	S5205	截止报告期末累计已被受理		0
000813	2018-12-31	1	1	S5206	截止报告期末累计已授权		0
000813	2018-12-31	1	1	S5203	已授权	3	1.38629
000813	2018-12-31	1	1	S5201	已申请	3	1.38629
000813	2019-12-31	1	1	S5206	截止报告期末累计已授权	14	2.70805
000813	2019-12-31	1	1	S5201	已申请	3	1.38629
000813	2020-12-31	1	1	S5201	已申请	8	2.19722
000813	2020-12-31	1	1	S5203	已授权	2	1.09861
000813	2020-12-31	1	1	S5206	截止报告期末累计已授权	18	2.94444
000813	2021-12-31	1	1	S5201	已申请	32	3.49651
000813	2021-12-31	1	1	S5203	已授权	8	2.19722
000813	2021-12-31	1	1	S5204	截至报告期末累计获得	26	3.29584
000813	2023-12-31	1	1	S5203	已授权	11	2.48491
000813	2023-12-31	1	1	S5201	已申请	30	3.43399
000816	2013-12-31	1	1	S5204	截至报告期末累计获得		0
000816	2014-12-31	1	1	S5204	截至报告期末累计获得		0
000816	2015-12-31	1	1	S5204	截至报告期末累计获得	15	2.77259
000816	2016-12-31	1	1	S5201	已申请	5	1.79176
000816	2017-12-31	1	1	S5206	截止报告期末累计已授权	14	2.70805
000816	2018-12-31	1	1	S5206	截止报告期末累计已授权	20	3.04452
000816	2019-12-31	1	1	S5206	截止报告期末累计已授权	21	3.09104
000816	2019-12-31	1	1	S5201	已申请	19	2.99573
000816	2020-12-31	1	1	S5201	已申请	22	3.13549
000816	2020-12-31	1	2	S5201	已申请		0
000816	2023-12-31	1	1	S5201	已申请	1	0.693147
000818	2016-12-31	1	1	S5203	已授权		0
000818	2018-12-31	1	1	S5201	已申请		0
000821	2013-12-31	1	1	S5204	截至报告期末累计获得	11	2.48491
000821	2014-12-31	1	1	S5201	已申请	8	2.19722
000821	2014-12-31	1	1	S5204	截至报告期末累计获得	11	2.48491
000821	2015-12-31	1	1	S5201	已申请	2	1.09861
000821	2015-12-31	1	1	S5204	截至报告期末累计获得	17	2.89037
000821	2016-12-31	1	1	S5202	已获得	8	2.19722
000821	2016-12-31	1	1	S5204	截至报告期末累计获得	36	3.61092
000821	2016-12-31	1	1	S5201	已申请	9	2.30259
000821	2017-12-31	1	1	S5204	截至报告期末累计获得	44	3.80666
000821	2017-12-31	1	1	S5205	截止报告期末累计已被受理		0
000821	2018-12-31	1	1	S5204	截至报告期末累计获得	120	4.79579
000821	2019-12-31	1	1	S5204	截至报告期末累计获得	77	4.35671
000821	2020-12-31	1	1	S5204	截至报告期末累计获得	74	4.31749
000821	2020-12-31	1	1	S5205	截止报告期末累计已被受理		0
000821	2021-12-31	1	1	S5204	截至报告期末累计获得	82	4.41884
000821	2021-12-31	1	1	S5205	截止报告期末累计已被受理		0
000821	2022-12-31	1	1	S5205	截止报告期末累计已被受理		0
000821	2022-12-31	1	2	S5204	截至报告期末累计获得		0
000821	2022-12-31	1	1	S5204	截至报告期末累计获得	89	4.49981
000821	2023-12-31	1	2	S5204	截至报告期末累计获得		0
000821	2023-12-31	1	1	S5204	截至报告期末累计获得	135	4.91265
000821	2023-12-31	1	1	S5205	截止报告期末累计已被受理		0
000822	2016-12-31	1	1	S5203	已授权	1	0.693147
000822	2019-12-31	2	1	S5201	已申请		0
000822	2021-12-31	1	1	S5203	已授权		0
000822	2022-12-31	1	1	S5202	已获得		0
000822	2023-12-31	1	1	S5202	已获得		0
000823	2013-12-31	1	1	S5203	已授权	4	1.60944
000823	2013-12-31	1	1	S5204	截至报告期末累计获得	10	2.3979
000823	2014-12-31	1	1	S5203	已授权	6	1.94591
000823	2015-12-31	1	1	S5206	截止报告期末累计已授权	62	4.14313
000823	2015-12-31	1	1	S5203	已授权	12	2.56495
000823	2016-12-31	1	1	S5206	截止报告期末累计已授权	76	4.34381
000823	2016-12-31	1	1	S5203	已授权	12	2.56495
000823	2017-12-31	1	1	S5206	截止报告期末累计已授权	87	4.47734
000823	2017-12-31	1	1	S5203	已授权	11	2.48491
000823	2018-12-31	1	1	S5206	截止报告期末累计已授权	97	4.58497
000823	2018-12-31	1	1	S5203	已授权	10	2.3979
000823	2019-12-31	1	1	S5206	截止报告期末累计已授权	108	4.69135
000823	2019-12-31	1	1	S5203	已授权	11	2.48491
000823	2020-12-31	1	1	S5206	截止报告期末累计已授权	111	4.7185
000823	2020-12-31	1	1	S5203	已授权	3	1.38629
000823	2021-12-31	1	1	S5206	截止报告期末累计已授权	123	4.82028
000823	2021-12-31	1	1	S5203	已授权	12	2.56495
000823	2021-12-31	1	2	S5203	已授权	1	0.693147
000823	2022-12-31	1	1	S5206	截止报告期末累计已授权	137	4.92725
000823	2022-12-31	1	1	S5203	已授权	13	2.63906
000823	2023-12-31	1	1	S5206	截止报告期末累计已授权	153	5.03695
000823	2023-12-31	1	1	S5203	已授权	16	2.83321
000825	2016-12-31	1	1	S5201	已申请	92	4.5326
000825	2016-12-31	1	1	S5203	已授权	112	4.72739
000825	2022-12-31	1	1	S5201	已申请		0
000831	2016-12-31	1	2	S5201	已申请	1	0.693147
000831	2016-12-31	1	1	S5201	已申请	1	0.693147
000831	2016-12-31	1	1	S5203	已授权		0
000831	2017-12-31	1	2	S5201	已申请		0
000831	2017-12-31	1	1	S5201	已申请	1	0.693147
000831	2017-12-31	1	1	S5203	已授权	1	0.693147
000831	2018-12-31	1	1	S5202	已获得	3	1.38629
000836	2015-12-31	1	1	S5202	已获得	2	1.09861
000836	2015-12-31	1	1	S5201	已申请	4	1.60944
000836	2015-12-31	1	1	S5204	截至报告期末累计获得	5	1.79176
000836	2016-12-31	1	1	S5202	已获得	7	2.07944
000836	2016-12-31	1	1	S5201	已申请	10	2.3979
000836	2016-12-31	1	1	S5204	截至报告期末累计获得	10	2.3979
000836	2018-12-31	1	1	S5202	已获得		0
000836	2019-12-31	1	1	S5202	已获得	4	1.60944
000836	2020-12-31	1	1	S5202	已获得	1	0.693147
000836	2021-12-31	2	1	S5202	已获得	5	1.79176
000836	2021-12-31	1	1	S5202	已获得	12	2.56495
000837	2013-12-31	1	1	S5203	已授权	2	1.09861
000837	2014-12-31	1	1	S5203	已授权	8	2.19722
000837	2015-12-31	1	1	S5203	已授权	8	2.19722
000837	2016-12-31	1	1	S5201	已申请		0
000837	2016-12-31	1	1	S5203	已授权	5	1.79176
000837	2017-12-31	1	1	S5201	已申请	4	1.60944
000837	2017-12-31	1	1	S5203	已授权		0
000837	2018-12-31	1	1	S5201	已申请	7	2.07944
000837	2018-12-31	1	1	S5203	已授权		0
000837	2019-12-31	1	1	S5201	已申请	10	2.3979
000837	2019-12-31	1	1	S5203	已授权		0
000837	2020-12-31	1	1	S5201	已申请		0
000837	2020-12-31	1	1	S5203	已授权	3	1.38629
000837	2021-12-31	1	1	S5201	已申请		0
000837	2021-12-31	1	1	S5203	已授权		0
000837	2022-12-31	2	1	S5201	已申请	17	2.89037
000837	2022-12-31	2	1	S5203	已授权		0
000837	2023-12-31	1	1	S5201	已申请		0
000837	2023-12-31	1	1	S5203	已授权		0
000848	2013-12-31	1	1	S5204	截至报告期末累计获得		0
000848	2014-12-31	1	1	S5204	截至报告期末累计获得		0
000848	2015-12-31	1	1	S5201	已申请	6	1.94591
000848	2015-12-31	1	1	S5202	已获得	3	1.38629
000848	2015-12-31	1	1	S5204	截至报告期末累计获得	7	2.07944
000848	2016-12-31	1	1	S5204	截至报告期末累计获得		0
000848	2017-12-31	1	1	S5204	截至报告期末累计获得	10	2.3979
000848	2017-12-31	1	1	S5202	已获得		0
000848	2018-12-31	1	1	S5202	已获得		0
000848	2018-12-31	1	1	S5204	截至报告期末累计获得	12	2.56495
000848	2019-12-31	1	1	S5204	截至报告期末累计获得	12	2.56495
000848	2020-12-31	1	1	S5204	截至报告期末累计获得	11	2.48491
000848	2021-12-31	1	1	S5204	截至报告期末累计获得	11	2.48491
000848	2022-12-31	1	1	S5204	截至报告期末累计获得	11	2.48491
000848	2023-12-31	1	1	S5204	截至报告期末累计获得	12	2.56495
000850	2013-12-31	1	1	S5204	截至报告期末累计获得	5	1.79176
000850	2014-12-31	1	1	S5201	已申请		0
000850	2014-12-31	1	1	S5203	已授权	1	0.693147
000850	2014-12-31	1	1	S5206	截止报告期末累计已授权	5	1.79176
000850	2015-12-31	1	1	S5201	已申请	93	4.54329
000850	2015-12-31	1	1	S5202	已获得	1	0.693147
000850	2015-12-31	1	1	S5204	截至报告期末累计获得	6	1.94591
000850	2016-12-31	1	1	S5203	已授权	24	3.21888
000850	2016-12-31	1	1	S5202	已获得		0
000850	2016-12-31	1	1	S5201	已申请	50	3.93183
000850	2016-12-31	1	1	S5206	截止报告期末累计已授权	30	3.43399
000850	2017-12-31	1	1	S5202	已获得	24	3.21888
000850	2017-12-31	1	1	S5204	截至报告期末累计获得	54	4.00733
000850	2018-12-31	1	1	S5203	已授权	20	3.04452
000850	2018-12-31	1	1	S5204	截至报告期末累计获得	74	4.31749
000850	2018-12-31	1	1	S5201	已申请	40	3.71357
000850	2019-12-31	1	1	S5203	已授权	2	1.09861
000850	2019-12-31	1	1	S5206	截止报告期末累计已授权	76	4.34381
000850	2019-12-31	1	1	S5201	已申请	29	3.4012
000850	2020-12-31	1	1	S5201	已申请	28	3.3673
000850	2020-12-31	1	1	S5206	截止报告期末累计已授权	77	4.35671
000850	2021-12-31	1	1	S5201	已申请	27	3.3322
000850	2021-12-31	1	1	S5203	已授权		0
000850	2021-12-31	1	1	S5206	截止报告期末累计已授权	77	4.35671
000850	2022-12-31	1	1	S5206	截止报告期末累计已授权	79	4.38203
000850	2022-12-31	1	1	S5201	已申请	6	1.94591
000850	2023-12-31	1	1	S5206	截止报告期末累计已授权	88	4.48864
000850	2023-12-31	1	1	S5201	已申请	30	3.43399
000850	2023-12-31	1	1	S5203	已授权	9	2.30259
000852	2015-12-31	1	1	S5205	截止报告期末累计已被受理	22	3.13549
000852	2021-12-31	1	1	S5201	已申请		0
000852	2021-12-31	1	1	S5203	已授权		0
000852	2023-12-31	1	1	S5206	截止报告期末累计已授权		0
000856	2013-12-31	1	1	S5201	已申请		0
000856	2014-12-31	1	1	S5202	已获得		0
000856	2016-12-31	1	1	S5202	已获得		0
000856	2017-12-31	1	1	S5202	已获得		0
000856	2017-12-31	1	1	S5201	已申请	3	1.38629
000856	2018-12-31	1	1	S5202	已获得		0
000856	2022-12-31	1	1	S5202	已获得	5	1.79176
000856	2023-12-31	1	1	S5201	已申请		0
000856	2023-12-31	1	1	S5203	已授权		0
000856	2023-12-31	1	1	S5204	截至报告期末累计获得		0
000858	2016-12-31	1	1	S5202	已获得		0
000858	2017-12-31	1	1	S5202	已获得	3	1.38629
000858	2018-12-31	1	1	S5202	已获得	3	1.38629
000858	2019-12-31	1	1	S5203	已授权	5	1.79176
000859	2013-12-31	1	1	S5203	已授权	1	0.693147
000859	2013-12-31	1	1	S5204	截至报告期末累计获得	7	2.07944
000859	2014-12-31	1	1	S5203	已授权	4	1.60944
000859	2014-12-31	1	1	S5204	截至报告期末累计获得	11	2.48491
000859	2015-12-31	1	1	S5204	截至报告期末累计获得	13	2.63906
000859	2015-12-31	1	1	S5203	已授权	4	1.60944
000859	2016-12-31	1	1	S5204	截至报告期末累计获得	23	3.17805
000859	2016-12-31	1	1	S5203	已授权	10	2.3979
000859	2017-12-31	1	1	S5203	已授权	11	2.48491
000859	2017-12-31	1	1	S5204	截至报告期末累计获得	39	3.68888
000859	2018-12-31	1	1	S5204	截至报告期末累计获得	53	3.98898
000859	2018-12-31	1	1	S5203	已授权	19	2.99573
000859	2019-12-31	1	1	S5204	截至报告期末累计获得	60	4.11087
000859	2019-12-31	1	1	S5203	已授权	6	1.94591
000859	2020-12-31	1	1	S5204	截至报告期末累计获得	80	4.39445
000859	2020-12-31	1	1	S5203	已授权		0
000859	2021-12-31	1	1	S5203	已授权		0
000859	2022-12-31	1	1	S5203	已授权		0
000859	2022-12-31	1	1	S5201	已申请		0
000859	2023-12-31	1	1	S5203	已授权		0
000868	2013-12-31	1	1	S5201	已申请	33	3.52636
000868	2014-12-31	1	1	S5203	已授权	3	1.38629
000868	2016-12-31	1	1	S5202	已获得	1	0.693147
000868	2017-12-31	1	1	S5203	已授权	70	4.26268
000868	2018-12-31	1	1	S5203	已授权	83	4.43082
000868	2019-12-31	1	1	S5203	已授权	20	3.04452
000868	2020-12-31	1	1	S5203	已授权	12	2.56495
000869	2013-12-31	1	1	S5203	已授权		0
000869	2016-12-31	1	1	S5201	已申请	2	1.09861
000869	2022-12-31	1	1	S5202	已获得	3	1.38629
000869	2023-12-31	1	1	S5202	已获得	1	0.693147
000876	2019-12-31	1	1	S5205	截止报告期末累计已被受理		0
000876	2019-12-31	1	1	S5206	截止报告期末累计已授权		0
000876	2019-12-31	1	1	S5201	已申请	90	4.51086
000876	2020-12-31	1	1	S5205	截止报告期末累计已被受理		0
000876	2020-12-31	1	1	S5206	截止报告期末累计已授权		0
000876	2020-12-31	1	1	S5201	已申请	93	4.54329
000877	2013-12-31	1	1	S5201	已申请		0
000877	2013-12-31	1	1	S5203	已授权		0
000877	2014-12-31	1	1	S5204	截至报告期末累计获得	9	2.30259
000877	2015-12-31	1	1	S5204	截至报告期末累计获得	9	2.30259
000877	2016-12-31	1	1	S5204	截至报告期末累计获得	11	2.48491
000877	2017-12-31	1	1	S5204	截至报告期末累计获得	9	2.30259
000877	2018-12-31	1	1	S5204	截至报告期末累计获得	11	2.48491
000877	2019-12-31	1	1	S5204	截至报告期末累计获得	11	2.48491
000877	2020-12-31	1	1	S5204	截至报告期末累计获得	10	2.3979
000877	2021-12-31	1	1	S5204	截至报告期末累计获得	192	5.26269
000877	2022-12-31	1	1	S5204	截至报告期末累计获得	278	5.63121
000878	2016-12-31	1	1	S5203	已授权		0
000878	2016-12-31	1	1	S5201	已申请		0
000878	2017-12-31	1	1	S5201	已申请	19	2.99573
000878	2017-12-31	1	1	S5203	已授权	4	1.60944
000878	2019-12-31	1	1	S5201	已申请		0
000878	2019-12-31	1	1	S5203	已授权	9	2.30259
000878	2020-12-31	1	1	S5201	已申请	35	3.58352
000878	2020-12-31	1	1	S5203	已授权	6	1.94591
000878	2020-12-31	1	1	S5206	截止报告期末累计已授权	79	4.38203
000878	2021-12-31	1	1	S5201	已申请	49	3.91202
000878	2021-12-31	1	1	S5203	已授权	13	2.63906
000878	2022-12-31	2	1	S5201	已申请	74	4.31749
000878	2022-12-31	2	1	S5203	已授权	16	2.83321
000878	2022-12-31	2	2	S5203	已授权		0
000878	2023-12-31	1	1	S5201	已申请	131	4.8828
000878	2023-12-31	1	2	S5201	已申请		0
000878	2023-12-31	1	1	S5203	已授权	16	2.83321
000878	2023-12-31	1	2	S5203	已授权		0
000880	2020-12-31	1	1	S5203	已授权		0
000881	2016-12-31	1	1	S5204	截至报告期末累计获得		0
000881	2016-12-31	1	1	S5201	已申请	66	4.20469
000881	2016-12-31	1	1	S5203	已授权	23	3.17805
000881	2017-12-31	1	1	S5201	已申请	51	3.95124
000881	2017-12-31	1	1	S5203	已授权	22	3.13549
000881	2018-12-31	1	1	S5201	已申请	109	4.70048
000881	2018-12-31	1	1	S5203	已授权	36	3.61092
000881	2019-12-31	1	1	S5201	已申请	70	4.26268
000881	2019-12-31	1	1	S5204	截至报告期末累计获得	211	5.35659
000881	2020-12-31	1	1	S5206	截止报告期末累计已授权		0
000881	2020-12-31	1	1	S5202	已获得		0
000881	2021-12-31	1	1	S5203	已授权		0
000881	2021-12-31	1	1	S5206	截止报告期末累计已授权		0
000887	2013-12-31	1	1	S5206	截止报告期末累计已授权	21	3.09104
000887	2014-12-31	1	1	S5204	截至报告期末累计获得	29	3.4012
000887	2014-12-31	1	2	S5204	截至报告期末累计获得		0
000887	2015-12-31	1	1	S5206	截止报告期末累计已授权	37	3.63759
000887	2015-12-31	1	2	S5206	截止报告期末累计已授权		0
000887	2016-12-31	1	1	S5204	截至报告期末累计获得	57	4.06044
000887	2016-12-31	1	2	S5204	截至报告期末累计获得		0
000887	2017-12-31	1	1	S5204	截至报告期末累计获得	64	4.17439
000887	2017-12-31	1	2	S5204	截至报告期末累计获得		0
000887	2018-12-31	1	1	S5204	截至报告期末累计获得	87	4.47734
000887	2018-12-31	1	2	S5204	截至报告期末累计获得		0
000887	2019-12-31	1	1	S5204	截至报告期末累计获得	96	4.57471
000887	2019-12-31	1	2	S5204	截至报告期末累计获得		0
000887	2020-12-31	1	1	S5204	截至报告期末累计获得	110	4.70953
000887	2020-12-31	1	2	S5204	截至报告期末累计获得		0
000887	2021-12-31	1	2	S5204	截至报告期末累计获得		0
000887	2021-12-31	1	1	S5204	截至报告期末累计获得	84	4.44265
000887	2022-12-31	1	1	S5204	截至报告期末累计获得	118	4.77912
000887	2022-12-31	1	2	S5204	截至报告期末累计获得		0
000887	2023-12-31	1	2	S5204	截至报告期末累计获得		0
000887	2023-12-31	1	1	S5204	截至报告期末累计获得	135	4.91265
000890	2013-12-31	1	1	S5203	已授权	1	0.693147
000890	2014-12-31	1	1	S5201	已申请	5	1.79176
000890	2014-12-31	1	1	S5203	已授权		0
000890	2015-12-31	1	1	S5202	已获得	5	1.79176
000890	2016-12-31	1	1	S5202	已获得	5	1.79176
000895	2020-12-31	1	1	S5201	已申请		0
000898	2013-12-31	1	1	S5201	已申请	341	5.83481
000898	2013-12-31	1	1	S5203	已授权	132	4.89035
000898	2015-12-31	1	1	S5201	已申请	694	6.54391
000898	2015-12-31	1	1	S5202	已获得	353	5.8693
000898	2015-12-31	1	1	S5204	截至报告期末累计获得	752	6.62407
000898	2017-12-31	1	1	S5201	已申请		0
000898	2018-12-31	1	1	S5201	已申请	303	5.71703
000898	2018-12-31	1	1	S5203	已授权	197	5.28827
000898	2019-12-31	1	1	S5201	已申请	325	5.7869
000898	2019-12-31	1	1	S5203	已授权	214	5.37064
000898	2020-12-31	1	1	S5203	已授权		0
000898	2023-12-31	1	1	S5201	已申请	544	6.30079
000898	2023-12-31	1	2	S5201	已申请	7	2.07944
000898	2023-12-31	1	1	S5203	已授权	301	5.71043
000898	2023-12-31	1	2	S5203	已授权	7	2.07944
000898	2023-12-31	1	1	S5204	截至报告期末累计获得	2515	7.83043
000901	2014-12-31	1	1	S5201	已申请	41	3.73767
000901	2014-12-31	1	1	S5203	已授权	24	3.21888
000901	2015-12-31	1	1	S5201	已申请	52	3.97029
000901	2015-12-31	1	1	S5202	已获得	21	3.09104
000901	2016-12-31	1	1	S5202	已获得		0
000901	2016-12-31	1	1	S5201	已申请	41	3.73767
000901	2016-12-31	1	1	S5203	已授权	25	3.2581
000901	2022-12-31	1	1	S5203	已授权		0
000901	2022-12-31	1	1	S5201	已申请		0
000901	2023-12-31	1	1	S5201	已申请		0
000901	2023-12-31	1	1	S5203	已授权	121	4.80402
000902	2015-12-31	1	1	S5202	已获得		0
000902	2015-12-31	1	1	S5204	截至报告期末累计获得		0
000902	2016-12-31	1	1	S5202	已获得	1	0.693147
000902	2016-12-31	1	1	S5204	截至报告期末累计获得		0
000902	2017-12-31	1	1	S5201	已申请	3	1.38629
000902	2017-12-31	1	1	S5203	已授权		0
000902	2017-12-31	1	1	S5204	截至报告期末累计获得		0
000902	2018-12-31	1	1	S5202	已获得		0
000902	2018-12-31	1	1	S5206	截止报告期末累计已授权		0
000903	2013-12-31	1	1	S5201	已申请	9	2.30259
000903	2013-12-31	1	1	S5203	已授权	2	1.09861
000903	2015-12-31	1	1	S5201	已申请	5	1.79176
000903	2015-12-31	1	1	S5202	已获得	3	1.38629
000903	2015-12-31	1	1	S5204	截至报告期末累计获得	5	1.79176
000903	2017-12-31	1	1	S5204	截至报告期末累计获得	12	2.56495
000903	2017-12-31	1	1	S5201	已申请		0
000903	2017-12-31	1	1	S5203	已授权	5	1.79176
000903	2018-12-31	1	1	S5204	截至报告期末累计获得	19	2.99573
000903	2019-12-31	1	1	S5204	截至报告期末累计获得	19	2.99573
000903	2020-12-31	1	1	S5204	截至报告期末累计获得	26	3.29584
000903	2021-12-31	1	1	S5204	截至报告期末累计获得	36	3.61092
000908	2014-12-31	1	1	S5201	已申请	24	3.21888
000908	2014-12-31	1	1	S5204	截至报告期末累计获得	98	4.59512
000908	2015-12-31	1	1	S5204	截至报告期末累计获得	125	4.83628
000908	2016-12-31	1	1	S5204	截至报告期末累计获得	127	4.85203
000908	2017-12-31	1	1	S5204	截至报告期末累计获得	134	4.90527
000908	2018-12-31	1	1	S5204	截至报告期末累计获得	128	4.85981
000908	2018-12-31	1	1	S5202	已获得		0
000908	2019-12-31	1	1	S5204	截至报告期末累计获得	142	4.96284
000908	2019-12-31	1	1	S5202	已获得		0
000908	2020-12-31	1	1	S5204	截至报告期末累计获得	139	4.94164
000908	2020-12-31	1	1	S5202	已获得		0
000910	2013-12-31	1	1	S5201	已申请	33	3.52636
000910	2014-12-31	1	1	S5201	已申请	24	3.21888
000910	2015-12-31	1	1	S5204	截至报告期末累计获得	11	2.48491
000910	2016-12-31	1	1	S5201	已申请	20	3.04452
000910	2017-12-31	1	1	S5201	已申请	29	3.4012
000910	2018-12-31	1	1	S5201	已申请	41	3.73767
000910	2019-12-31	1	1	S5201	已申请	35	3.58352
000910	2020-12-31	1	1	S5201	已申请	33	3.52636
000910	2020-12-31	1	1	S5203	已授权	1	0.693147
000912	2015-12-31	1	1	S5201	已申请	10	2.3979
000912	2015-12-31	1	1	S5202	已获得	1	0.693147
000912	2015-12-31	1	1	S5204	截至报告期末累计获得	17	2.89037
000912	2021-12-31	1	1	S5203	已授权	2	1.09861
000912	2021-12-31	1	1	S5201	已申请	11	2.48491
000912	2022-12-31	1	1	S5204	截至报告期末累计获得		0
000912	2022-12-31	1	1	S5201	已申请	8	2.19722
000912	2022-12-31	1	1	S5203	已授权	1	0.693147
000912	2023-12-31	1	1	S5201	已申请	8	2.19722
000912	2023-12-31	1	1	S5203	已授权	7	2.07944
000912	2023-12-31	1	1	S5204	截至报告期末累计获得		0
000913	2016-12-31	1	1	S5201	已申请		0
000913	2017-12-31	1	1	S5201	已申请	15	2.77259
000913	2017-12-31	1	1	S5204	截至报告期末累计获得	21	3.09104
000913	2017-12-31	1	1	S5205	截止报告期末累计已被受理	27	3.3322
000913	2019-12-31	1	1	S5201	已申请	10	2.3979
000913	2021-12-31	1	1	S5204	截至报告期末累计获得	125	4.83628
000915	2013-12-31	1	1	S5203	已授权	4	1.60944
000915	2015-12-31	1	1	S5201	已申请	17	2.89037
000915	2015-12-31	1	1	S5202	已获得	12	2.56495
000915	2015-12-31	1	1	S5204	截至报告期末累计获得	22	3.13549
000915	2020-12-31	1	1	S5206	截止报告期末累计已授权	33	3.52636
000919	2013-12-31	1	1	S5202	已获得	3	1.38629
000919	2014-12-31	1	1	S5203	已授权		0
000919	2016-12-31	1	1	S5202	已获得	3	1.38629
000919	2021-12-31	1	1	S5201	已申请	3	1.38629
000919	2021-12-31	1	1	S5203	已授权	1	0.693147
000919	2022-12-31	1	1	S5201	已申请	4	1.60944
000919	2022-12-31	1	1	S5203	已授权	6	1.94591
000919	2023-12-31	1	1	S5203	已授权	10	2.3979
000919	2023-12-31	1	1	S5201	已申请	8	2.19722
000920	2015-12-31	1	1	S5201	已申请	43	3.78419
000920	2015-12-31	1	1	S5202	已获得	18	2.94444
000920	2015-12-31	1	1	S5204	截至报告期末累计获得	61	4.12713
000920	2018-12-31	1	1	S5204	截至报告期末累计获得	38	3.66356
000920	2018-12-31	1	1	S5206	截止报告期末累计已授权	57	4.06044
000920	2019-12-31	1	1	S5202	已获得	6	1.94591
000920	2022-12-31	1	1	S5204	截至报告期末累计获得	59	4.09434
000920	2022-12-31	1	2	S5204	截至报告期末累计获得	4	1.60944
000920	2023-12-31	1	1	S5204	截至报告期末累计获得	69	4.2485
000920	2023-12-31	1	2	S5204	截至报告期末累计获得	4	1.60944
000921	2013-12-31	1	1	S5201	已申请	152	5.03044
000922	2013-12-31	1	1	S5201	已申请		0
000922	2016-12-31	1	1	S5203	已授权		0
000922	2018-12-31	1	1	S5201	已申请		0
000922	2019-12-31	1	1	S5204	截至报告期末累计获得	2	1.09861
000922	2019-12-31	1	1	S5203	已授权		0
000922	2019-12-31	1	1	S5201	已申请	8	2.19722
000922	2020-12-31	1	1	S5204	截至报告期末累计获得	5	1.79176
000922	2020-12-31	1	1	S5203	已授权		0
000922	2021-12-31	1	1	S5204	截至报告期末累计获得	11	2.48491
000922	2021-12-31	1	1	S5203	已授权		0
000922	2022-12-31	1	1	S5204	截至报告期末累计获得	17	2.89037
000922	2023-12-31	1	1	S5204	截至报告期末累计获得	200	5.3033
000922	2023-12-31	1	1	S5203	已授权	49	3.91202
000925	2015-12-31	1	1	S5201	已申请	30	3.43399
000925	2015-12-31	1	1	S5202	已获得	11	2.48491
000925	2015-12-31	1	1	S5204	截至报告期末累计获得	19	2.99573
000925	2016-12-31	1	1	S5204	截至报告期末累计获得	33	3.52636
000925	2017-12-31	1	1	S5204	截至报告期末累计获得	41	3.73767
000925	2019-12-31	1	1	S5204	截至报告期末累计获得	74	4.31749
000925	2020-12-31	1	1	S5204	截至报告期末累计获得	75	4.33073
000925	2020-12-31	1	1	S5202	已获得	17	2.89037
000925	2021-12-31	2	1	S5204	截至报告期末累计获得	94	4.55388
000925	2021-12-31	2	1	S5202	已获得	19	2.99573
000925	2022-12-31	1	1	S5201	已申请	67	4.21951
000925	2022-12-31	1	1	S5202	已获得	25	3.2581
000925	2022-12-31	1	1	S5204	截至报告期末累计获得	139	4.94164
000925	2023-12-31	1	1	S5201	已申请	37	3.63759
000925	2023-12-31	1	1	S5204	截至报告期末累计获得	177	5.18178
000925	2023-12-31	1	1	S5202	已获得	38	3.66356
000930	2013-12-31	1	1	S5201	已申请		0
000930	2013-12-31	1	1	S5203	已授权		0
000930	2018-12-31	1	1	S5205	截止报告期末累计已被受理	46	3.85015
000930	2019-12-31	1	1	S5203	已授权		0
000930	2019-12-31	1	1	S5206	截止报告期末累计已授权		0
000930	2020-12-31	1	1	S5203	已授权		0
000930	2020-12-31	1	1	S5201	已申请		0
000930	2021-12-31	1	1	S5203	已授权		0
000930	2021-12-31	1	1	S5206	截止报告期末累计已授权		0
000930	2022-12-31	1	1	S5203	已授权		0
000930	2022-12-31	1	1	S5206	截止报告期末累计已授权		0
000930	2023-12-31	1	1	S5206	截止报告期末累计已授权		0
000931	2014-12-31	1	1	S5203	已授权	1	0.693147
000931	2017-12-31	1	1	S5204	截至报告期末累计获得		0
000931	2022-12-31	1	1	S5202	已获得	12	2.56495
000931	2022-12-31	1	1	S5201	已申请	2	1.09861
000931	2023-12-31	1	1	S5202	已获得	8	2.19722
000931	2023-12-31	1	1	S5203	已授权	8	2.19722
000932	2014-12-31	1	1	S5201	已申请	69	4.2485
000932	2014-12-31	1	1	S5203	已授权	16	2.83321
000932	2015-12-31	1	1	S5201	已申请	42	3.7612
000932	2016-12-31	1	1	S5202	已获得	35	3.58352
000932	2016-12-31	1	1	S5204	截至报告期末累计获得	115	4.75359
000932	2017-12-31	1	1	S5202	已获得	37	3.63759
000932	2018-12-31	1	1	S5202	已获得	41	3.73767
000932	2019-12-31	1	1	S5202	已获得	37	3.63759
000932	2020-12-31	1	1	S5202	已获得	25	3.2581
000932	2022-12-31	1	1	S5203	已授权		0
000932	2023-12-31	1	1	S5203	已授权	120	4.79579
000935	2023-12-31	1	1	S5202	已获得	1	0.693147
000936	2020-12-31	1	1	S5204	截至报告期末累计获得	1	0.693147
000936	2020-12-31	1	1	S5203	已授权		0
000936	2020-12-31	1	1	S5201	已申请		0
000936	2022-12-31	1	1	S5202	已获得	2	1.09861
000936	2023-12-31	1	1	S5202	已获得	1	0.693147
000938	2023-12-31	1	1	S5205	截止报告期末累计已被受理		0
000949	2014-12-31	1	1	S5204	截至报告期末累计获得		0
000949	2022-12-31	1	1	S5203	已授权		0
000952	2014-12-31	1	1	S5202	已获得		0
000952	2014-12-31	1	1	S5206	截止报告期末累计已授权		0
000952	2015-12-31	1	1	S5204	截至报告期末累计获得	26	3.29584
000952	2015-12-31	1	1	S5201	已申请	4	1.60944
000952	2015-12-31	1	1	S5202	已获得	3	1.38629
000952	2016-12-31	1	1	S5206	截止报告期末累计已授权	21	3.09104
000952	2017-12-31	1	1	S5206	截止报告期末累计已授权	23	3.17805
000952	2017-12-31	1	1	S5202	已获得	2	1.09861
000952	2018-12-31	1	1	S5206	截止报告期末累计已授权	23	3.17805
000952	2019-12-31	1	1	S5206	截止报告期末累计已授权	24	3.21888
000952	2019-12-31	1	1	S5203	已授权	2	1.09861
000952	2019-12-31	1	1	S5201	已申请	2	1.09861
000952	2020-12-31	1	1	S5206	截止报告期末累计已授权	25	3.2581
000952	2021-12-31	1	1	S5206	截止报告期末累计已授权	33	3.52636
000952	2021-12-31	1	1	S5201	已申请	5	1.79176
000952	2022-12-31	1	1	S5206	截止报告期末累计已授权	33	3.52636
000952	2023-12-31	1	1	S5201	已申请	27	3.3322
000952	2023-12-31	1	1	S5203	已授权	4	1.60944
000952	2023-12-31	1	1	S5206	截止报告期末累计已授权	28	3.3673
000955	2016-12-31	1	1	S5204	截至报告期末累计获得	15	2.77259
000955	2019-12-31	1	1	S5201	已申请	15	2.77259
000955	2019-12-31	1	1	S5203	已授权	3	1.38629
000955	2020-12-31	1	1	S5201	已申请	18	2.94444
000955	2020-12-31	1	1	S5203	已授权	1	0.693147
000955	2022-12-31	1	1	S5202	已获得	15	2.77259
000955	2022-12-31	1	1	S5203	已授权		0
000955	2023-12-31	1	1	S5203	已授权	4	1.60944
000957	2014-12-31	1	1	S5203	已授权	3	1.38629
000957	2015-12-31	1	1	S5201	已申请		0
000957	2015-12-31	1	1	S5203	已授权	6	1.94591
000957	2016-12-31	1	1	S5204	截至报告期末累计获得	35	3.58352
000957	2017-12-31	1	1	S5201	已申请		0
000957	2017-12-31	1	1	S5204	截至报告期末累计获得		0
000957	2020-12-31	1	1	S5201	已申请		0
000957	2020-12-31	1	1	S5203	已授权	8	2.19722
000957	2021-12-31	1	1	S5201	已申请		0
000957	2021-12-31	1	1	S5203	已授权	8	2.19722
000957	2022-12-31	1	1	S5203	已授权	19	2.99573
000959	2015-12-31	1	1	S5203	已授权		0
000959	2015-12-31	1	1	S5201	已申请		0
000959	2016-12-31	1	1	S5206	截止报告期末累计已授权	279	5.63479
000959	2016-12-31	1	1	S5203	已授权	61	4.12713
000959	2017-12-31	1	1	S5203	已授权	94	4.55388
000959	2018-12-31	1	1	S5203	已授权	97	4.58497
000959	2019-12-31	1	1	S5203	已授权	141	4.95583
000959	2020-12-31	1	1	S5203	已授权	148	5.00395
000959	2021-12-31	1	1	S5206	截止报告期末累计已授权	182	5.20949
000959	2022-12-31	1	1	S5206	截止报告期末累计已授权	166	5.11799
000959	2023-12-31	1	1	S5206	截止报告期末累计已授权	229	5.43808
000960	2015-12-31	1	1	S5201	已申请		0
000960	2015-12-31	1	1	S5203	已授权		0
000960	2016-12-31	1	1	S5203	已授权	10	2.3979
000960	2017-12-31	1	1	S5203	已授权		0
000960	2018-12-31	1	1	S5203	已授权	13	2.63906
000960	2019-12-31	1	1	S5203	已授权	13	2.63906
000960	2019-12-31	1	1	S5201	已申请	23	3.17805
000960	2020-12-31	1	1	S5203	已授权	6	1.94591
000960	2021-12-31	1	1	S5203	已授权	17	2.89037
000960	2021-12-31	1	1	S5204	截至报告期末累计获得	71	4.27667
000960	2023-12-31	1	1	S5203	已授权	10	2.3979
000960	2023-12-31	1	1	S5204	截至报告期末累计获得	99	4.60517
000962	2013-12-31	1	1	S5201	已申请		0
000962	2013-12-31	1	1	S5202	已获得		0
000962	2013-12-31	1	1	S5203	已授权		0
000962	2013-12-31	1	1	S5204	截至报告期末累计获得		0
000962	2013-12-31	1	1	S5205	截止报告期末累计已被受理		0
000962	2013-12-31	1	1	S5206	截止报告期末累计已授权		0
000962	2014-12-31	1	1	S5201	已申请		0
000962	2014-12-31	1	1	S5203	已授权		0
000962	2014-12-31	1	1	S5205	截止报告期末累计已被受理		0
000962	2014-12-31	1	1	S5206	截止报告期末累计已授权		0
000962	2015-12-31	1	1	S5204	截至报告期末累计获得		0
000962	2015-12-31	1	1	S5203	已授权		0
000962	2015-12-31	1	1	S5206	截止报告期末累计已授权		0
000962	2016-12-31	1	2	S5204	截至报告期末累计获得		0
000962	2017-12-31	1	2	S5204	截至报告期末累计获得		0
000962	2017-12-31	1	1	S5201	已申请	5	1.79176
000962	2017-12-31	1	1	S5203	已授权		0
000962	2021-12-31	1	1	S5203	已授权		0
000962	2021-12-31	1	1	S5201	已申请		0
000962	2022-12-31	1	1	S5201	已申请		0
000962	2022-12-31	1	1	S5203	已授权		0
000962	2022-12-31	1	2	S5204	截至报告期末累计获得		0
000962	2023-12-31	1	2	S5204	截至报告期末累计获得		0
000962	2023-12-31	1	1	S5201	已申请		0
000962	2023-12-31	1	1	S5203	已授权	10	2.3979
000969	2013-12-31	1	1	S5201	已申请		0
000969	2013-12-31	1	1	S5203	已授权		0
000969	2014-12-31	1	1	S5201	已申请		0
000969	2014-12-31	1	1	S5203	已授权		0
000969	2015-12-31	1	1	S5206	截止报告期末累计已授权		0
000969	2015-12-31	1	1	S5201	已申请		0
000969	2015-12-31	1	1	S5203	已授权		0
000969	2016-12-31	1	1	S5206	截止报告期末累计已授权		0
000969	2016-12-31	1	1	S5201	已申请		0
000969	2016-12-31	1	1	S5203	已授权		0
000969	2017-12-31	1	1	S5204	截至报告期末累计获得	231	5.44674
000969	2017-12-31	1	1	S5201	已申请		0
000969	2017-12-31	1	1	S5203	已授权		0
000969	2018-12-31	1	1	S5204	截至报告期末累计获得	254	5.54126
000969	2018-12-31	1	1	S5201	已申请		0
000969	2018-12-31	1	1	S5203	已授权		0
000969	2019-12-31	1	1	S5206	截止报告期末累计已授权	307	5.7301
000969	2020-12-31	1	1	S5206	截止报告期末累计已授权		0
000969	2020-12-31	1	1	S5201	已申请		0
000969	2020-12-31	1	2	S5201	已申请		0
000969	2020-12-31	1	1	S5203	已授权		0
000969	2021-12-31	1	1	S5201	已申请		0
000969	2021-12-31	1	2	S5201	已申请		0
000969	2021-12-31	1	1	S5203	已授权		0
000969	2021-12-31	1	1	S5206	截止报告期末累计已授权		0
000969	2022-12-31	1	1	S5206	截止报告期末累计已授权		0
000969	2023-12-31	1	1	S5206	截止报告期末累计已授权		0
000970	2015-12-31	1	1	S5204	截至报告期末累计获得	102	4.63473
000970	2015-12-31	1	1	S5201	已申请	21	3.09104
000970	2015-12-31	1	1	S5202	已获得	24	3.21888
000970	2016-12-31	1	1	S5205	截止报告期末累计已被受理		0
000970	2016-12-31	1	1	S5206	截止报告期末累计已授权	110	4.70953
000970	2023-12-31	1	1	S5205	截止报告期末累计已被受理		0
000970	2023-12-31	1	1	S5206	截止报告期末累计已授权	220	5.39816
000973	2013-12-31	1	1	S5201	已申请	9	2.30259
000973	2013-12-31	1	1	S5206	截止报告期末累计已授权	1	0.693147
000973	2014-12-31	1	1	S5201	已申请	10	2.3979
000973	2014-12-31	1	1	S5203	已授权	8	2.19722
000973	2015-12-31	1	1	S5203	已授权	4	1.60944
000973	2015-12-31	1	1	S5201	已申请	18	2.94444
000973	2015-12-31	1	1	S5204	截至报告期末累计获得	34	3.55535
000973	2015-12-31	1	1	S5202	已获得	12	2.56495
000973	2016-12-31	1	1	S5203	已授权	18	2.94444
000973	2016-12-31	1	1	S5201	已申请	15	2.77259
000973	2017-12-31	1	1	S5201	已申请	11	2.48491
000973	2017-12-31	1	1	S5203	已授权	8	2.19722
000973	2018-12-31	1	1	S5206	截止报告期末累计已授权	77	4.35671
000973	2018-12-31	1	1	S5201	已申请	7	2.07944
000973	2018-12-31	1	1	S5203	已授权	5	1.79176
000973	2019-12-31	1	1	S5204	截至报告期末累计获得	77	4.35671
000973	2019-12-31	1	1	S5201	已申请	25	3.2581
000973	2019-12-31	1	1	S5203	已授权	2	1.09861
000973	2020-12-31	1	1	S5204	截至报告期末累计获得	77	4.35671
000973	2020-12-31	1	1	S5201	已申请	14	2.70805
000973	2020-12-31	1	1	S5203	已授权	3	1.38629
000973	2021-12-31	1	1	S5201	已申请	22	3.13549
000973	2021-12-31	1	1	S5203	已授权	10	2.3979
000973	2021-12-31	1	1	S5206	截止报告期末累计已授权	89	4.49981
000973	2022-12-31	1	1	S5201	已申请	17	2.89037
000973	2022-12-31	1	1	S5203	已授权	14	2.70805
000973	2022-12-31	1	1	S5206	截止报告期末累计已授权	104	4.65396
000973	2023-12-31	1	1	S5203	已授权	12	2.56495
000973	2023-12-31	1	1	S5206	截止报告期末累计已授权	116	4.76217
000980	2015-12-31	1	1	S5204	截至报告期末累计获得	3	1.38629
000980	2015-12-31	1	1	S5202	已获得	0	0
000980	2015-12-31	1	1	S5201	已申请	1	0.693147
000982	2013-12-31	1	1	S5203	已授权	2	1.09861
000982	2014-12-31	1	1	S5201	已申请		0
000982	2014-12-31	1	1	S5202	已获得	1	0.693147
000982	2014-12-31	1	1	S5204	截至报告期末累计获得		0
000982	2014-12-31	1	1	S5206	截止报告期末累计已授权	3	1.38629
000985	2013-12-31	1	1	S5204	截至报告期末累计获得	7	2.07944
000985	2014-12-31	1	1	S5204	截至报告期末累计获得		0
000985	2015-12-31	1	1	S5204	截至报告期末累计获得	4	1.60944
000985	2016-12-31	1	1	S5206	截止报告期末累计已授权		0
000985	2017-12-31	1	1	S5204	截至报告期末累计获得	4	1.60944
000985	2018-12-31	1	1	S5204	截至报告期末累计获得	4	1.60944
000985	2021-12-31	1	1	S5204	截至报告期末累计获得	8	2.19722
000985	2022-12-31	1	1	S5204	截至报告期末累计获得	8	2.19722
000985	2023-12-31	1	1	S5204	截至报告期末累计获得	11	2.48491
000988	2013-12-31	1	1	S5201	已申请	23	3.17805
000988	2014-12-31	1	1	S5201	已申请		0
000988	2014-12-31	1	1	S5203	已授权	8	2.19722
000988	2014-12-31	1	2	S5203	已授权		0
000988	2015-12-31	1	1	S5204	截至报告期末累计获得		0
[truncated: 37,278 more rows]

## Sheet: Sheet2
证券代码	数字发明	证券代码	数字发明					数字发明
000008	56	4
000008		4
000008		4
000008		4
000008		4
000008		4
000008		4
000008		4
000008		4
000008	9	8
000008	206	8
000008	15	8
000008	229	8
000012		8
000012		8
000012	44	8
000012		8
000012	12	8
000012	56	10
000012	56	10
000012	85	16
000012		16
000012	146	16
000012	30	16
000012	922	16
000012	304	16
000012	159	16
000012	47	16
000012	3	16
000012	2	16
000012	1101	16
000012	374	16
000012	121	16
000012	67	17
000012	1275	17
000012	465	17
000012	156	17
000012	98	17
000016		17
000021		17
000021		17
000021	8	17
000021	1	20
000021	16	20
000021	6	20
000021	19	20
000021	10	20
000021	6	20
000021	2	20
000021	3	20
000021	14	20
000021	3	20
000021	36	20
000021	6	20
000021	32	20
000021	7	21
000030	24	21
000030	24	21
000030	24	21
000030	54	21
000030	79	21
000039		21
000039	251	21
000039	266	21
000039		21
000039	247	21
000039	799	21
000039	185	21
000039		30
000039	229	30
000039		30
000039	292	30
000039		30
000045	1	30
000045	4	30
000045		30
000045	2	30
000045	4	30
000045		30
000045	2	32
000045		32
000045	13	32
000045	4	32
000045	1	45
000045	0	45
000045	15	45
000045	1	45
000045		45
000045	7	45
000045	16	45
000045	7	45
000045	1	45
000045	0	49
000045	1	49
000045		49
000045	4	49
000045		49
000045	23	49
000045	8	49
000045	1	49
000045	0	49
000045	2	49
000045	3	49
000045	18	49
000045	0	49
000045	5	50
000045	1	50
000048	1	50
000048		50
000048	2	50
000049	59	50
000049	6	50
000049	24	50
000049	54	50
000049	12	50
000049	34	50
000049		50
000049		50
000049	82	63
000049	16	63
000049	43	63
000049	79	63
000049	22	63
000049	61	63
000049	27	63
000049	19	63
000049	87	63
000049	18	63
000049	28	63
000049	107	63
000049	21	63
000049	24	66
000049	118	66
000049	19	66
000049	16	66
000049	134	66
000049	27	66
000049	16	66
000049	158	66
000049	52	66
000049	24	66
000050	1631	66
000050	574	66
000050	2571	66
000055	56	68
000055	69	68
000055	7	68
000055	80	68
000055		68
000055	10	68
000055	6	70
000055	107	70
000055		70
000055	83	70
000055		70
000055	4	70
000055	188	70
000055		70
000055		70
000055	1	70
000055		70
000055		70
000055		70
000055		78
000055		100
000060		100
000060		100
000060		100
000063		100
000063		100
000063		100
000063		100
000063		100
000066	90	100
000066	47	100
000066		100
000066		100
000066		153
000066	29	153
000066	38	153
000066	173	153
000066	47	153
000066		153
000066	191	153
000070		153
000070	2	153
000070		153
000070	4	153
000070	12	153
000070	2	153
000070		155
000070	23	155
000070		155
000070	33	155
000070	8	155
000070	62	157
000070	13	157
000070	75	157
000070	12	157
000070	88	157
000070	122	157
000070	27	157
000070		157
000070	134	157
000100		157
000100		157
000100		157
000100		157
000100	2780	301
000100	3758	301
000100		301
000100	4592	301
000100		301
000100		301
000100		333
000100		333
000100		333
000100		333
000100		333
000100		333
000100		333
000100	22065	333
000100		333
000100		333
000100		333
000100		338
000100		338
000100		338
000100		338
000100		338
000100		338
000100		338
000100		338
000100		338
000100		338
000100		338
000100		338
000153	20	338
000153	38	400
000153	26	400
000153	22	400
000153	15	400
000153	7	400
000153	12	400
000153	9	400
000153	14	400
000153	9	400
000153	13	400
000153	4	400
000153	124	400
000153	4	400
000153	18	403
000153	138	403
000153	139	403
000153	139	403
000153	151	403
000157		403
000157		404
000157		404
000157	271	404
000157	8	404
000157	101	404
000157	168	404
000157		404
000157		404
000157		404
000157		404
000157		404
000157	6753	404
000157		404
000157		407
000301	29	407
000301	31	407
000301		407
000301		408
000301	45	408
000301	56	408
000301	102	408
000301		408
000333		408
000333	2585	410
000333	1200	410
000333	1452	410
000333	4205	410
000333		410
000333	5562	410
000333	7714	410
000333	6102	410
000333	2704	413
000333		413
000333	2890	413
000333		413
000333	28000	413
000333		413
000333		413
000338	20	413
000338		413
000400		413
000400	383	413
000400	75	413
000400	417	420
000400	112	420
000400	421	420
000400		420
000400	273	420
000400	124	420
000400		420
000400	245	420
000400		420
000401	168	420
000403		420
000403		420
000403		422
000403	7	422
000403	9	422
000403	9	422
000403	20	422
000403		422
000403		422
000403		422
000404	4	422
000404	13	422
000404	2	423
000404		423
000404	3	423
000404	26	423
000404		423
000404	8	423
000404	24	423
000404	3	423
000404	4	423
000404		423
000404		423
000404	11	423
000408	1	423
000408	4	425
000408	4	425
000410		425
000410		425
000410		425
000410	8	425
000410	8	425
000410	7	425
000410		425
000410	4	425
000413	40	425
000413	1	425
000413	1	425
000418	528	510
000418	30	510
000418	49	510
000423	32	510
000423	2	510
000423	48	510
000423	25	510
000423	25	510
000423	20	510
000423	52	510
000423	17	510
000423		510
000423		513
000425		513
000425	307	513
000425	1046	513
000425		513
000425		513
000425	1041	513
000425	274	513
000425	1282	513
000425		513
000425	234	513
000425		513
000425	1372	513
000425	170	518
000425		518
000425		518
000425	1372	518
000425	1537	518
000425	96	518
000425		518
000425		518
000425	1545	518
000425		518
000425	1670	518
000425		518
000425		518
000425	145	519
000425	1670	519
000425	2458	519
000425		519
000425	484	519
000425	3271	519
000425		519
000425	800	519
000488	9	519
000488	12	521
000488	18	521
000488		521
000488		521
000488	25	521
000488		521
000488		521
000488		521
000488		521
000488	41	521
000505		521
000505		521
000510	1	521
000511		523
000511		523
000511		523
000513	25	523
000513		523
000513	17	523
000513	37	523
000513		523
000513	18	523
000519	13	523
000519	26	523
000519	44	525
000519		525
000519	10	525
000519	7	525
000519	2	525
000523	2	525
000523	2	525
000523	2	525
000523	7	525
000523	3	525
000523	3	528
000523	10	528
000525		528
000525		528
000525		528
000525		528
000525		528
000528		528
000528		528
000528	160	528
000528		528
000528	32	528
000528		528
000528	98	530
000528	73	530
000528	126	530
000528	84	530
000528	141	530
000528	98	530
000528	379	530
000528	133	530
000528	5	530
000528	66	530
000528	100	530
000528	22	530
000528	52	530
000528	1	533
000528		533
000528		533
000528		533
000528		533
000528		533
000528	73	533
000528	732	533
000528	776	533
000528	126	533
000528	882	533
000528	113	533
000530		533
000530	3	534
000533		534
000533	2	534
000533	2	534
000533	16	534
000533	3	536
000533	2	536
000533	18	536
000534	13	536
000534		536
000534	21	536
000534	12	536
000534		536
000534	63	536
000536	17	536
000536	109	536
000536	800	536
000538	101	538
000538		538
000538		538
000541	11	538
000541	1	538
000541	5	538
000541	10	538
000541		538
000541		538
000541	12	538
000541		538
000541	9	538
000541		538
000541		541
000541		541
000541		541
000541		541
000541		541
000541		541
000541		541
000541		541
000541		541
000541	52	541
000545	2	541
000545	1	541
000545	2	541
000545	2	545
000545	3	545
000545		545
000545	6	545
000545	4	545
000545	1	545
000545	7	545
000545	2	545
000545	1	545
000545	8	545
000545	10	545
000547	29	547
000547	2	547
000547		547
000547		547
000547		547
000547		547
000547	187	547
000547	219	547
000550	32	547
000550	6	547
000550	22	547
000553	9	547
000553	3	547
000553	16	550
000553		550
000553	3	550
000553	19	550
000553	2	550
000553	2	550
000553	20	550
000553	6	550
000553		550
000553	24	550
000559	69	550
000559	19	550
000559	67	550
000559	10	553
000559	196	553
000559	264	553
000559	59	553
000559	350	553
000559	79	553
000561		553
000561	9	553
000561	14	553
000561	14	553
000561	11	553
000561	22	553
000565	3	553
000565	3	559
000565	2	559
000565	1	559
000565	3	559
000565	7	559
000565	2	559
000565	14	559
000565	4	559
000565	1	559
000565	5	559
000565	2	559
000565	12	559
000565	5	559
000565	3	561
000565	14	561
000565		561
000565		561
000565	1	561
000565	4	561
000565	1	561
000565	16	561
000565	4	561
000565	1	561
000565	17	561
000566		561
000566	5	561
000566	16	565
000566	7	565
000566	3	565
000566	19	565
000566	28	565
000566		565
000566	3	565
000566	2	565
000566	1	565
000566		565
000566	17	565
000568		565
000568		565
000568		566
000568	188	566
000570	6	566
000570	11	566
000570		566
000570		566
000570	14	566
000570		566
000570		566
000570	12	566
000570		566
000570		566
000570	13	566
000570		570
000570		570
000570	12	570
000570		570
000570	13	570
000570		570
000570	13	570
000572		570
000572		570
000572		570
000572		570
000576	3	570
000576	2	570
000576	2	571
000576	1	572
000584	2	572
000584		572
000584		572
000584	11	572
000584		572
000584	15	572
000584		572
000584	5	572
000584	292	572
000586		572
000586		576
000586		576
000587	0	576
000587	3	576
000587	3	581
000587	4	581
000589	3	581
000589	4	581
000589	7	581
000589	1	581
000589	9	581
000589		581
000589	9	581
000589	9	581
000589	9	581
000589	10	581
000589	9	581
000589	8	584
000589	12	584
000589	16	584
000590		584
000590	6	584
000590		584
000590		584
000590		584
000590		584
000590		584
000595		584
000595		584
000595	21	586
000595	0	586
000595	8	586
000595		586
000595	14	586
000595		586
000595	23	586
000595		586
000596		586
000596		586
000596	3	586
000596	9	586
000596		590
000596		590
000597		590
000597	13	590
000599	3	590
000599		590
000612	4	590
000612		590
000619	1	590
000619	1	590
000619	2	590
000619	3	590
000619	1	595
000619	1	595
000619	1	595
000619	1	595
000619	1	595
000619	5	595
000619	5	595
000623		595
000623		595
000625	455	597
000625	139	597
000625	508	597
000625	401	597
000625	1225	597
000625	402	597
000625	1415	597
000625	400	597
000625	1474	597
000625	1633	597
000625	2148	597
000625	2704	597
000629	20	597
000630		605
000630		607
000630		607
000630	18	607
000636		615
000636		615
000636		615
000636	40	615
000636		615
000636	2	617
000636		617
000636		617
000636		617
000636		622
000636	34	622
000636	30	622
000636		622
000636		622
000636		622
000636		622
000636		622
000636	35	622
000636		622
000636	22	623
000636	1	623
000636	47	623
000636	293	623
000636	299	623
000637		623
000637		623
000637		623
000637	2	623
000637	2	623
000637	1	623
000637		623
000639	5	623
000639	7	625
000639	7	625
000639	4	625
000639	9	625
000639	15	625
000639	16	625
000639		625
000639	17	625
000651	7043	625
000651	937	625
000651		625
000651	911	625
000651	3662	625
000651	4182	627
000651	1273	627
000651	22715	627
000651	7462	627
000651	1834	627
000651	31500	633
000651	8860	633
000651	1739	633
000651	40195	633
000651	8793	633
000651	2743	633
000651	49529	635
000651	13507	635
000651	8214	635
000651	3008	635
000651	120	635
000651	7508	635
000651	3270	635
000651	64174	635
000651	20416	635
000657		635
000657		635
000657	82	635
000657	22	635
000657	241	636
000657		636
000657	49	636
000657		636
000657		636
000657	51	636
000657	67	636
000657	73	636
000657	70	636
000657	422	636
000657		636
000657	89	636
000657	27	636
000657	449	650
000657		650
000657	31	650
000657	24	650
000657	464	650
000657		650
000657	70	650
000657	45	650
000657	536	650
000657		650
000657	92	650
000657	49	650
000657	571	650
000657		651
000657	99	651
000657	66	651
000657	618	651
000657		651
000657		651
000661	19	651
000661	15	651
000661	60	651
000663	3	651
000663	6	651
000663	20	651
000663	23	651
000663	26	661
000670		661
000670		661
000670		661
000670		661
000670		661
000670		661
000670		661
000677	8	661
000677	5	661
000677	7	661
000677	7	661
000677	15	661
000677	13	663
000677	60	663
000677	1	663
000677		663
000677	1	663
000677		663
000678		663
000678	1	669
000678	6	670
000678		670
000678	3	670
000678	13	670
000678		670
000678		670
000678		676
000678		676
000678		676
000678		677
000680		677
000680	23	677
000680		677
000680		677
000680	12	677
000680		677
000680		677
000680		677
000680	27	677
000680		678
000680		678
000680	19	678
000680		678
000680		678
000680	14	678
000680	1	678
000680	36	678
000680		678
000680	35	678
000680	11	678
000680	29	678
000680	17	678
000683	3	680
000683	2	680
000683	2	680
000683	12	680
000683	12	680
000683	12	680
000687	10	680
000687	9	680
000687	47	680
000687		680
000687		680
000687	5	680
000687		680
000687	10	682
000687		682
000687	11	682
000687		682
000687	62	682
000687		682
000687	62	682
000691	2	683
000691	2	683
000691	3	683
000691	3	683
000698	6	683
000698	6	683
000703	14	683
000703	16	683
000703	3	683
000703	49	683
000703	5	683
000703	50	683
000703	137	683
000703	113	691
000703	8	691
000703		691
000703	108	691
000703		697
000703	203	697
000703	262	697
000708		697
000708	3	697
000708	7	698
000708	7	700
000708	7	700
000708	2	700
000708	3	700
000708	35	700
000708		700
000708		700
000708	166	700
000708	1	700
000708	45	700
000708	218	700
000708	4	700
000708	72	700
000708	284	703
000708	5	703
000708	107	703
000708	391	703
000708	6	703
000708	122	703
000709		703
000709		703
000709		703
000709	186	703
000709		703
000709		703
000709	320	703
000709		707
000709	400	707
000709		707
000709		707
000709		707
000709		707
000717	20	707
000717	25	707
000717	130	707
000717	280	710
000717	11	710
000717	60	710
000717	391	710
000717	500	710
000725		710
000725		725
000725		725
000725		725
000725		725
000725		725
000725		725
000725		725
000725		725
000725		725
000726	9	725
000726	2	725
000726	62	725
000726	3	725
000726		727
000726		727
000726		727
000726		727
000726		727
000726		727
000726		727
000726		727
000726		727
000726	16	727
000726	21	727
000726	53	727
000727	11	731
000727	2	731
000727	14	731
000727	2	731
000727	12	731
000727		731
000727	7	731
000727	5	731
000727		731
000727	8	731
000727		731
000727	99	731
000727		731
000727		733
000727	128	733
000727		733
000727		733
000731		733
000731		733
000731	5	733
000731		733
000731		733
000731		733
000731		733
000731	2	733
000731		733
000731	2	737
000731	3	737
000731		737
000731	2	737
000731	2	737
000731		737
000731	2	737
000731		737
000731	19	738
000731		738
000731	19	738
000731	21	738
000731		738
000731	21	738
000731	20	738
000731	2	738
000733	74	738
000733	10	738
000733	43	738
000733	60	738
000733		738
000733	13	739
000733	58	739
000733	71	739
000733	30	739
000733	90	739
000733	88	739
000733	65	739
000733	157	739
000733	115	739
000733		739
000733	48	739
000733	214	739
000733	117	739
000733	55	755
000733	270	755
000733	92	755
000733	46	755
000733	309	755
000733	137	755
000733	24	756
000733	323	756
000733	162	756
000733	27	756
000733	359	756
000733	146	756
000733	51	756
000733	394	756
000733	187	756
000733	56	756
000733	453	756
000737	6	756
000737	2	756
000737	17	757
000737	3	757
000737	2	757
000737	1	757
000737	16	757
000737		757
000737	20	766
000737	20	766
000737		766
000737	7	766
000737	8	766
000737	3	766
000737	1	766
000737	9	766
000737	8	766
000737	1	766
000737	11	766
000737		766
000737		766
000738		768
000738	110	768
000738	45	768
000738	99	768
000738	34	768
000738	110	768
000738	67	768
000738	234	768
000738	126	768
000738	32	768
000738	308	768
000738	121	768
000738	79	768
000738	326	777
000738	129	777
000738	97	777
000738	135	777
000738	51	777
000738	385	777
000738	50	777
000738	143	777
000738	50	777
000738	121	777
000739	11	777
000739		777
000739	103	777
000739	12	782
000739	98	782
000739	137	782
000739	5	782
000739	100	782
000739	13	782
000739	4	782
000739	13	782
000739	113	782
000739	14	782
000739	129	782
000739	17	782
000739	21	782
000739	23	788
000739	5	788
000739	128	788
000748	25	788
000748	14	788
000751	2	788
000756	20	788
000756	16	788
000756		788
000756	15	788
000756	8	788
000756		788
000756		788
000756		790
000756		790
000756		790
000756		790
000756		790
000756		790
000756		790
000760	38	790
000760	15	790
000760	29	791
000761		792
000761		792
000761	81	792
000761		792
000761	11	792
000761	6	792
000761	6	792
000761	15	792
000761		792
000761		792
000761		792
000761	16	800
000761	107	800
000761	30	800
000761		800
000761	31	800
000761		800
000761		800
000761	82	800
000766		800
000766	4	800
000766		800
000766		800
000766		800
000766		801
000766	25	801
000766	30	801
000766	7	801
000766	41	801
000766	53	801
000766	14	801
000766	42	801
000766	2	801
000766	42	801
000766	2	801
000766	33	801
000766	14	801
000766	38	803
000766	13	810
000777	4	810
000777	2	810
000777	4	810
000777	4	810
000777		810
000777	8	810
000777	9	810
000777	37	810
000777	1	810
000777	31	811
000777	1	811
000777	4	811
000777		811
000778	131	811
000778	181	811
000778	264	811
000778	282	811
000778		811
000778	343	811
000778		811
000778	382	811
000778		811
000778	388	813
000778		813
000778	406	813
000778		813
000778	453	813
000778	7	813
000778	535	813
000778	7	816
000786		816
000786		816
000786		816
000786		816
000786		816
000786		816
000786		816
000786	191	816
000786	21	816
000786	136	816
000786		818
000786		818
000786		818
000786		818
000786		818
000786		818
000786		818
000786	5	818
000786		818
000786		818
000786		818
000786		818
000786		821
000786		821
000786		821
000786		821
000786		821
000786		821
000786		821
000786		821
000786		821
000786		821
000786		821
000786		821
000786		821
000786		822
000786		822
000786		822
000786		822
000786		822
000786		822
000786		822
000786	349	822
000786	13	822
000786	222	822
000786	5	822
000786		822
000789		823
000789	2	823
000790	11	823
000790	1	823
000790	7	823
000790		823
000790	4	823
000790	7	823
000790	3	823
000790	2	823
000790	17	823
000790	22	823
000790	23	823
000790	23	830
000790	28	830
000790	24	830
000790	4	830
000790	2	830
000790	27	830
000790		830
000790		830
000790		830
000790		830
000790		830
000790	4	830
000790		830
000790		836
000790	4	836
000790		836
000790	3	836
000792	9	836
000792	3	836
000792	8	836
000792	3	836
000792	55	836
000792	10	836
000792	72	836
000792	6	836
000792	39	836
000792	21	837
000792		837
000792	19	837
000792		837
000792		837
000792		837
000795	16	837
000795		837
000795		837
000795	28	837
000795	27	837
000795	24	837
000795		852
000795	2	852
000795	3	852
000795	11	852
000795	2	852
000795	202	852
000795	114	852
000795		852
000795		852
000795		852
000795		852
000795		852
000795		852
000800	1200	856
000801		856
000806	2	856
000806	7	856
000807		856
000807		856
000807	127	856
000807	147	856
000807	18	856
000807	13	856
000807	154	856
000807	168	862
000810	93	862
000810	378	862
000810	245	862
000810	129	868
000810	129	868
000810	471	868
000810	195	868
000810	195	868
000810	214	868
000810	266	868
000810	715	868
000810	364	868
000810	706	868
000810	378	868
000812		880
000812	3	880
000812	2	880
000812	4	880
000812	3	880
000812	2	880
000812	7	880
000813		880
000813	2	880
000813	2	880
000813		880
000813		880
000813		880
000813	3	881
000813	3	881
000813	14	881
000813	3	881
000813	8	881
000813	2	881
000813	18	893
000813	32	893
000813	8	893
000813	26	893
000813	11	901
000813	30	901
000816		901
000816		901
000816	15	901
000816	5	901
000816	14	901
000816	20	901
000816	21	901
000816	19	901
000816	22	901
000816		901
000816	1	901
000818		902
000818		902
000821	11	902
000821	8	902
000821	11	902
000821	2	902
000821	17	902
000821	8	902
000821	36	902
000821	9	902
000821	44	903
000821		903
000821	120	903
000821	77	903
000821	74	903
000821		903
000821	82	903
000821		903
000821		903
000821		903
000821	89	903
000821		903
000821	135	903
000821		908
000822	1	908
000822		908
000822		908
000822		908
000822		908
000823	4	908
000823	10	908
000823	6	908
000823	62	909
000823	12	912
000823	76	912
000823	12	912
000823	87	912
000823	11	912
000823	97	912
000823	10	912
000823	108	912
000823	11	912
000823	111	912
000823	3	913
000823	123	913
000823	12	913
000823	1	913
000823	137	913
000823	13	913
000823	153	913
000823	16	913
000825	92	913
000825	112	913
000825		913
000831	1	913
000831	1	915
000831		915
000831		915
000831	1	915
000831	1	915
000831	3	915
000836	2	915
000836	4	915
000836	5	915
000836	7	915
000836	10	915
000836	10	915
000836		915
000836	4	919
000836	1	919
000836	5	919
000836	12	919
000837	2	919
000837	8	919
000837	8	919
000837		919
000837	5	919
000837	4	919
000837		919
000837	7	919
000837		919
000837	10	920
000837		920
000837		920
000837	3	920
000837		920
000837		920
000837	17	920
000837		920
000837		920
000837		920
000848		920
000848		920
000848	6	921
000848	3	921
000848	7	921
000848		921
000848	10	921
000848		921
000848		921
000848	12	921
000848	12	921
000848	11	921
000848	11	921
000848	11	922
000848	12	922
000850	5	922
000850		922
000850	1	922
000850	5	922
000850	93	922
000850	1	922
000850	6	922
000850	24	922
000850		923
000850	50	923
000850	30	923
000850	24	923
000850	54	923
000850	20	923
000850	74	923
000850	40	925
000850	2	925
000850	76	925
000850	29	925
000850	28	925
000850	77	925
000850	27	925
000850		925
000850	77	925
000850	79	925
000850	6	925
000850	88	925
000850	30	925
000850	9	927
000852	22	927
000852		927
000852		927
000852		927
000856		927
000856		927
000856		930
000856		930
000856	3	930
000856		930
000856	5	930
000856		930
000856		930
000856		930
000858		930
000858	3	930
000858	3	930
000858	5	930
000859	1	931
000859	7	931
000859	4	931
000859	11	931
000859	13	931
000859	4	931
000859	23	936
000859	10	936
000859	11	936
000859	39	936
000859	53	936
000859	19	936
000859	60	936
000859	6	936
000859	80	936
000859		936
000859		936
000859		936
000859		936
000859		938
000868	33	938
000868	3	938
000868	1	938
000868	70	938
000868	83	938
000868	20	938
000868	12	938
000869		938
000869	2	938
000869	3	938
000869	1	938
000876		949
000876		949
000876	90	949
000876		949
000876		949
000876	93	949
000877		949
000877		949
000877	9	949
000877	9	949
000877	11	949
000877	9	949
000877	11	949
000877	11	950
000877	10	950
000877	192	950
000877	278	950
000878		950
000878		951
000878	19	951
000878	4	951
000878		951
000878	9	951
000878	35	951
000878	6	951
000878	79	951
000878	49	951
000878	13	951
000878	74	951
000878	16	951
000878		951
000878	131	952
000878		952
000878	16	952
000878		952
000880		952
000881		952
000881	66	952
000881	23	952
000881	51	952
000881	22	952
000881	109	952
000881	36	952
000881	70	952
000881	211	953
000881		953
000881		953
000881		953
000881		953
000887	21	957
000887	29	957
000887		957
000887	37	957
000887		957
000887	57	957
000887		957
000887	64	957
000887		957
000887	87	957
000887		957
000887	96	957
000887		957
000887	110	967
000887		967
000887		967
000887	84	967
000887	118	967
000887		967
000887		967
000887	135	967
000890	1	970
000890	5	970
000890		970
000890	5	970
000890	5	970
000895		970
000898	341	970
000898	132	970
000898	694	970
000898	353	970
000898	752	970
000898		970
000898	303	970
000898	197	976
000898	325	976
000898	214	976
000898		976
000898	544	976
000898	7	976
000898	301	976
000898	7	976
000898	2515	976
000901	41	976
000901	24	976
000901	52	977
000901	21	977
000901		977
000901	41	977
000901	25	977
000901		977
000901		977
000901		977
000901	121	977
000902		977
000902		977
000902	1	977
000902		977
000902	3	980
000902		980
000902		980
000902		980
000902		980
000903	9	980
000903	2	980
000903	5	980
000903	3	980
000903	5	980
000903	12	980
000903		981
000903	5	981
000903	19	981
000903	19	985
000903	26	985
000903	36	985
000908	24	985
000908	98	985
000908	125	985
000908	127	985
000908	134	985
000908	128	985
000908		985
000908	142	985
000908		985
000908	139	985
000908		988
000910	33	988
000910	24	988
000910	11	988
000910	20	988
000910	29	988
000910	41	988
000910	35	988
000910	33	988
000910	1	988
000912	10	988
000912	1	988
000912	17	988
000912	2	989
000912	11	989
000912		989
000912	8	989
000912	1	989
000912	8	989
000912	7	989
000912		989
000913		989
000913	15	989
000913	21	989
000913	27	989
000913	10	989
000913	125	990
000915	4	990
000915	17	990
000915	12	990
000915	22	990
000915	33	990
000919	3	990
000919		990
000919	3	990
000919	3	990
000919	1	990
000919	4	990
000919	6	990
000919	10	999
000919	8	999
000920	43	999
000920	18	999
000920	61	999
000920	38	999
000920	57	999
000920	6	999
000920	59	999
000920	4	999
000920	69	999
000920	4	999
000921	152	999
000922		1207
000922		1207
000922		1207
000922	2	1208
000922		1208
000922	8	1208
000922	5	1217
000922		1217
000922	11	1217
000922		1218
000922	17	1218
000922	200	1218
000922	49	1223
000925	30	1225
000925	11	1229
000925	19	1229
000925	33	1231
000925	41	1231
000925	74	1238
000925	75	1238
000925	17	1255
000925	94	1255
000925	19	1256
000925	67	1259
000925	25	1259
000925	139	1260
000925	37	1266
000925	177	1266
000925	38	1268
000930		1268
000930		1270
000930	46	1278
000930		1282
000930		1283
000930		1283
000930		1288
000930		1288
000930		1308
000930		1308
000930		1309
000930		1309
000931	1	1311
000931		1314
000931	12	1319
000931	2	1319
000931	8	1323
000931	8	1323
000932	69	1324
000932	16	1328
000932	42	1332
000932	35	1333
000932	115	1336
000932	37	1336
000932	41	1339
000932	37	1339
000932	25	1360
000932		1367
000932	120	1373
000935	1	1380
000936	1	1696
000936		1696
000936		1696
000936	2	1696
000936	1	1696
000938		1696
000949		1696
000949		1696
000952		1696
000952		1696
000952	26	1696
000952	4	1696
000952	3	1696
000952	21	2001
000952	23	2001
000952	2	2001
000952	23	2001
000952	24	2001
000952	2	2001
000952	2	2001
000952	25	2001
000952	33	2001
000952	5	2001
000952	33	2001
000952	27	2001
000952	4	2001
000952	28	2002
000955	15	2002
000955	15	2002
000955	3	2002
000955	18	2002
000955	1	2002
000955	15	2002
000955		2002
000955	4	2002
000957	3	2003
000957		2004
000957	6	2004
000957	35	2004
000957		2004
000957		2004
000957		2004
000957	8	2004
000957		2004
000957	8	2004
000957	19	2004
000959		2004
000959		2004
000959	279	2004
000959	61	2005
000959	94	2005
000959	97	2005
000959	141	2005
000959	148	2005
000959	182	2005
000959	166	2005
000959	229	2005
000960		2006
000960		2006
000960	10	2006
000960		2006
000960	13	2006
000960	13	2006
000960	23	2006
000960	6	2006
000960	17	2006
000960	71	2006
000960	10	2006
000960	99	2006
000962		2007
000962		2007
000962		2007
000962		2007
000962		2007
000962		2007
000962		2007
000962		2007
000962		2007
000962		2007
000962		2007
000962		2007
000962		2007
000962		2008
000962		2008
000962	5	2008
000962		2008
000962		2008
000962		2008
000962		2008
000962		2008
000962		2008
000962		2008
000962		2008
000962	10	2008
000969		2008
000969		2009
000969		2009
000969		2009
000969		2009
000969		2009
000969		2009
000969		2009
000969		2009
000969		2009
000969	231	2009
000969		2009
000969		2009
000969	254	2009
000969		2010
000969		2010
000969	307	2010
000969		2010
000969		2010
000969		2010
000969		2010
000969		2011
000969		2011
000969		2011
000969		2011
000969		2011
000969		2011
000970	102	2011
000970	21	2011
000970	24	2011
000970		2011
000970	110	2011
000970		2011
000970	220	2011
000973	9	2013
000973	1	2017
000973	10	2017
000973	8	2017
000973	4	2017
000973	18	2017
000973	34	2017
000973	12	2017
000973	18	2017
000973	15	2017
000973	11	2017
000973	8	2017
000973	77	2017
000973	7	2017
000973	5	2019
000973	77	2019
000973	25	2019
000973	2	2019
000973	77	2019
000973	14	2019
000973	3	2019
000973	22	2019
000973	10	2019
000973	89	2019
000973	17	2019
000973	14	2019
000973	104	2020
000973	12	2020
000973	116	2020
000980	3	2020
000980	0	2020
000980	1	2020
000982	2	2020
000982		2020
000982	1	2020
000982		2020
000982	3	2020
000985	7	2020
000985		2020
000985	4	2021
000985		2021
000985	4	2021
000985	4	2021
000985	8	2021
000985	8	2021
000985	11	2021
000988	23	2021
000988		2022
000988	8	2022
000988		2022
000988		2022
000988		2022
000988		2022
[truncated: 37,272 more rows]

## Sheet: Sheet3
5
5
5
5
5
5
5
5
5
5
5
5
5
22
22
22
22
22
22
22
22
22
22
22
22
22
4
4
4
4
4
4
4
4
4
4
4
4
4
5
5
5
5
5
5
5
5
5
5
5
5
5
3
3
3
3
3
3
3
3
3
3
3
3
3
10
10
10
10
10
10
10
10
10
10
10
10
10
1
1
1
1
1
1
1
1
1
1
1
1
1
11
11
11
11
11
11
11
11
11
11
11
11
11
5
5
5
5
5
5
5
5
5
5
5
5
5
101
101
101
101
101
101
101
101
101
101
101
101
101
2
2
2
2
2
2
2
2
2
9
9
9
9
9
9
9
9
9
9
9
9
9
5
5
5
5
5
5
5
5
5
5
5
5
5
0
0
0
0
0
0
0
0
0
0
0
0
0
19
19
19
19
19
19
19
19
19
19
19
19
19
1
1
1
1
1
1
1
1
1
1
1
1
1
8
8
8
8
8
8
8
8
8
8
8
8
8
2
2
2
2
2
2
2
2
2
2
2
2
2
3
3
3
3
3
3
3
3
3
3
3
3
3
35
35
35
35
35
35
35
35
35
35
35
35
35
3
3
3
3
3
3
3
3
3
3
3
3
3
3
3
3
3
3
3
3
3
3
3
3
3
1
1
1
1
1
1
1
1
1
1
1
1
1
41
41
41
41
41
41
41
41
41
41
41
41
41
8
8
8
8
8
8
8
8
8
8
8
8
8
1
1
1
1
1
1
1
1
1
1
1
1
1
36
36
36
36
36
36
36
36
36
36
36
36
36
11
11
11
11
11
4
4
4
4
4
4
4
4
4
4
4
4
4
7
7
7
7
7
7
7
7
7
7
7
7
7
44
44
44
44
44
44
44
44
44
44
44
44
44
24
24
24
24
24
24
24
24
24
24
24
24
24
1
1
1
1
1
1
1
1
1
1
1
1
1
10
10
10
10
10
10
10
10
10
10
10
10
10
1
1
1
1
1
1
1
1
1
1
1
1
1
2
2
2
2
2
2
2
2
2
2
2
2
2
9
9
9
9
9
9
9
9
9
9
9
9
9
1
1
1
1
1
1
1
1
1
1
1
1
1
38
38
38
38
38
38
38
38
38
38
38
38
38
6
6
6
6
6
6
6
6
6
6
6
6
6
16
16
16
16
16
16
16
16
16
16
16
16
16
6
6
6
6
6
6
6
6
6
6
6
6
6
4
4
4
4
4
4
4
4
4
4
1
1
1
1
1
1
1
1
1
1
1
1
1
1
1
1
1
1
1
1
1
1
1
1
1
1
14
14
14
14
14
14
14
14
14
14
14
14
14
1
1
1
1
1
1
1
1
1
1
1
1
1
9
9
9
9
9
9
9
9
9
9
9
9
9
2
2
2
2
2
2
2
2
2
2
2
2
2
4
4
4
4
4
4
4
4
4
4
4
4
4
12
12
12
12
12
12
12
12
12
12
12
12
12
5
5
5
5
5
5
5
5
5
5
5
5
5
4
4
4
53
53
53
53
53
53
53
53
53
53
53
53
53
1
1
1
1
1
1
1
1
1
1
1
1
1
43
43
43
43
43
43
43
43
43
43
43
43
43
2
2
2
2
2
2
2
2
2
2
2
2
2
13
13
13
13
13
13
13
13
13
13
13
13
13
17
17
17
17
17
17
17
17
17
17
17
17
17
9
9
9
9
9
9
9
9
9
9
9
9
9
4
4
4
4
4
4
4
4
4
4
4
4
4
3
3
3
3
3
3
3
3
3
3
3
3
3
1
1
1
1
1
1
1
1
1
1
1
1
1
8
8
8
8
8
8
8
8
8
8
8
8
8
11
11
11
11
11
11
11
11
11
11
11
11
11
3
3
3
3
3
3
3
3
3
3
3
3
3
1
1
1
1
1
1
1
1
1
1
1
1
0
0
0
0
0
0
0
0
0
0
0
0
0
62
62
62
62
62
62
62
62
62
62
62
62
62
4
4
4
4
4
4
4
4
4
4
4
4
4
4
4
4
4
4
4
4
4
4
4
4
4
4
0
0
0
0
0
0
0
0
0
0
0
0
0
5
5
5
5
5
5
5
5
5
5
5
5
5
1
1
1
1
1
1
1
1
1
1
1
1
1
11
11
11
11
11
11
11
11
11
11
11
11
11
3
3
3
3
3
3
3
3
3
3
3
3
3
13
13
13
13
13
13
13
13
13
13
13
13
13
13
13
13
13
13
13
13
13
13
13
13
13
13
3
3
3
3
3
3
3
3
3
3
3
3
89
89
89
89
89
89
89
89
89
89
89
89
89
23
23
23
23
23
23
23
23
23
23
23
23
23
10
10
10
10
10
10
10
10
10
10
10
10
10
27
27
27
27
27
27
27
27
27
27
27
27
27
2
2
2
2
2
2
2
2
2
2
2
2
2
7
7
7
7
7
7
7
7
7
7
7
7
7
17
17
17
17
17
17
17
17
17
17
17
17
17
4
4
4
4
4
4
4
4
4
4
4
4
4
15
15
15
15
15
15
15
15
15
15
15
15
15
63
63
63
63
63
63
63
63
63
63
63
63
1
1
1
1
1
1
1
1
1
1
1
1
1
11
11
11
11
11
11
11
11
11
11
11
11
11
3
1
1
1
1
1
1
1
1
1
1
1
1
1
1
1
1
1
1
1
1
1
1
1
1
1
1
1
1
1
1
1
1
1
1
1
1
1
1
1
5
5
5
5
5
5
5
5
5
5
5
5
5
1
1
1
1
1
1
1
1
1
1
1
1
1
28
28
28
28
28
28
28
28
28
28
28
28
28
1
1
1
1
1
1
1
1
1
1
1
1
1
10
10
10
10
10
10
10
10
10
10
10
10
10
7
7
7
7
7
7
7
7
7
7
7
7
7
12
12
12
12
12
12
12
12
12
12
12
12
12
7
7
7
7
7
7
7
7
7
7
7
7
7
3
3
3
3
3
3
3
3
3
3
3
3
3
9
9
9
9
9
9
9
9
9
9
9
9
9
1
1
1
1
1
1
1
1
1
1
1
1
1
1
1
1
1
1
1
1
1
1
1
1
1
1
1
1
1
1
1
1
1
1
1
1
1
1
8
44
44
44
44
44
44
44
44
44
44
44
44
1
1
1
1
1
1
1
1
1
1
1
1
1
1
1
1
1
1
1
1
1
1
1
1
6
6
6
6
6
6
6
6
6
6
11
11
11
11
11
11
11
11
11
11
11
11
8
8
8
8
8
8
8
8
8
8
8
8
3
3
3
3
3
3
3
3
3
3
3
3
8
8
8
8
8
8
8
8
8
8
8
8
1
1
1
1
1
1
1
1
1
1
1
1
51
51
51
51
51
51
51
51
51
51
51
51
1
1
1
1
1
1
1
1
1
1
1
1
4
4
4
4
4
4
4
4
4
4
1
1
1
1
1
1
1
1
1
1
1
1
26
26
26
26
26
26
26
26
26
26
26
26
11
11
11
11
11
11
11
11
11
11
11
11
0
0
0
0
0
0
0
0
0
0
0
0
16
16
16
16
16
16
16
16
16
16
16
16
2
2
2
2
2
2
2
2
2
2
2
2
2
2
2
2
2
2
2
2
2
2
2
2
10
10
10
10
10
10
10
10
10
10
10
10
8
8
8
8
8
8
8
8
8
8
8
8
4
4
4
4
4
4
4
4
4
4
4
4
1
1
1
1
1
1
1
1
1
1
1
1
6
6
6
6
6
6
6
6
6
6
6
6
45
45
45
45
45
45
45
45
45
45
45
45
8
8
8
8
8
8
8
8
8
8
8
8
24
24
24
24
24
24
24
24
24
24
24
24
2
2
2
2
2
2
2
2
2
2
2
2
6
6
6
6
6
6
6
6
6
6
6
6
47
47
47
47
47
47
47
1
1
1
1
1
1
1
1
1
1
1
1
4
4
4
4
4
4
4
4
4
4
4
4
6
6
6
6
6
6
6
6
6
6
6
6
4
4
4
4
4
4
4
4
4
4
4
4
4
4
4
4
4
4
4
4
9
9
9
9
9
9
9
9
9
9
9
9
9
9
9
9
9
9
0
0
0
0
0
0
0
0
0
0
8
8
8
8
8
8
8
8
8
8
18
18
18
18
18
18
18
18
18
18
3
3
3
3
3
1
1
1
1
1
1
1
1
1
1
4
4
4
4
4
4
4
4
4
4
4
4
4
4
4
4
4
4
4
4
9
9
9
9
9
9
9
9
9
9
2
2
2
2
2
2
2
2
2
9
9
9
9
9
9
9
9
9
9
1
1
1
1
1
1
1
1
1
1
5
5
5
5
5
5
5
5
5
5
2
2
2
2
2
2
2
2
2
2
2
2
2
2
2
2
2
2
2
2
22
22
22
22
22
22
22
22
22
22
12
12
12
12
12
12
12
12
12
12
2
2
2
2
2
2
2
2
2
2
17
17
17
17
17
17
17
17
17
3
3
3
16
16
16
16
16
16
16
16
16
5
5
5
5
5
5
5
5
5
13
13
13
13
13
13
13
13
13
4
4
4
4
4
4
4
4
4
[truncated: 5,970 more rows]
