# Supplementary material for: How corporate ESG performance enables New-qualitive Productive forces development based on Listed companies in the manufacturing industry: Evidence from China
Source: Research Square preprint supplement (doi:10.21203/rs.3.rs-6158355/v1), 2025-07-24
Supplement: Supplementary file 9 [file a04313c56e27e31f2cf04489.xlsx]

## Sheet: sheet1
股票代码	股票简称	统计截止日期	报表类型编码	营业利润增长率A
000002	深万科A	1992-12-31	A
000002	深万科A	1993-12-31	A
000002	深万科A	1994-12-31	A
000002	深万科A	1995-06-30	A
000002	深万科A	1995-12-31	A
000002	深万科A	1996-06-30	A
000002	深万科A	1996-12-31	A
000002	深万科A	1997-06-30	A
000002	深万科A	1997-12-31	A
000002	深万科A	1998-06-30	A
000002	深万科A	1998-12-31	A
000002	深万科A	1999-06-30	A
000002	深万科A	1999-12-31	A
000002	深万科A	2000-06-30	A
000002	深万科A	2000-12-31	A
000002	深万科A	2001-06-30	A
000002	深万科A	2001-12-31	A
000002	万科A	2002-03-31	A
000002	万科A	2002-06-30	A	2.4337
000002	万科A	2002-09-30	A	-0.559128
000002	万科A	2002-12-31	A	3.82755
000002	万科A	2003-03-31	A	-0.789448
000002	万科A	2003-06-30	A	2.6994
000002	万科A	2003-09-30	A	-0.596661
000002	万科A	2003-09-30	B
000002	万科A	2003-12-31	A	3.86826
000002	万科A	2003-12-31	B
000002	万科A	2004-03-31	A	-0.624488
000002	万科A	2004-03-31	B	-0.612799
000002	万科A	2004-06-30	A	0.851253
000002	万科A	2004-06-30	B	1.00408
000002	万科A	2004-09-30	A	-0.647976
000002	万科A	2004-09-30	B	-0.666702
000002	万科A	2004-12-31	A	5.29891
000002	万科A	2004-12-31	B	6.04377
000002	万科A	2005-03-31	A	-0.456398
000002	万科A	2005-03-31	B	-0.488836
000002	万科A	2005-06-30	A	0.989112
000002	万科A	2005-06-30	B	1.15971
000002	万科A	2005-09-30	A	-0.794886
000002	万科A	2005-09-30	B	-0.859885
000002	G 万科A	2005-12-31	A	3.66899
000002	G 万科A	2005-12-31	B	5.33758
000002	G 万科A	2006-03-31	A	-0.191155
000002	G 万科A	2006-03-31	B	-0.196116
000002	G 万科A	2006-06-30	A	1.10763
000002	G 万科A	2006-06-30	B	1.14171
000002	G 万科A	2006-09-30	A	-0.835291
000002	G 万科A	2006-09-30	B	-0.834324
000002	万科A	2006-12-31	A	6.20166
000002	万科A	2006-12-31	B	4.5609
000002	万科A	2007-03-31	A	-0.416928
000002	万科A	2007-03-31	B	-1.05822
000002	万科A	2007-06-30	A	1.0632
000002	万科A	2007-06-30	B
000002	万科A	2007-09-30	A	-0.745848
000002	万科A	2007-09-30	B
000002	万科A	2007-12-31	A	9.75083
000002	万科A	2007-12-31	B
000002	万科A	2008-03-31	A	-0.780156
000002	万科A	2008-03-31	B	-0.948465
000002	万科A	2008-06-30	A	1.23639
000002	万科A	2008-06-30	B	16.59
000002	万科A	2008-09-30	A	-0.812619
000002	万科A	2008-09-30	B	-0.940512
000002	万科A	2008-12-31	A	5.04956
000002	万科A	2008-12-31	B	-4.35402
000002	万科A	2009-03-31	A	-0.527484
000002	万科A	2009-03-31	B
000002	万科A	2009-06-30	A	1.40278
000002	万科A	2009-06-30	B
000002	万科A	2009-09-30	A	-0.718884
000002	万科A	2009-09-30	B	-1.04086
000002	万科A	2009-12-31	A	3.40241
000002	万科A	2009-12-31	B
000002	万科A	2010-03-31	A	-0.578972
000002	万科A	2010-03-31	B	-0.997666
000002	万科A	2010-06-30	A	0.670844
000002	万科A	2010-06-30	B	6101.09
000002	万科A	2010-09-30	A	-0.654614
000002	万科A	2010-09-30	B	-0.941386
000002	万科A	2010-12-31	A	6.73932
000002	万科A	2010-12-31	B	-0.803333
000002	万科A	2011-03-31	A	-0.760571
000002	万科A	2011-03-31	B	1.89376
000002	万科A	2011-06-30	A	0.679303
000002	万科A	2011-06-30	B	44.037
000002	万科A	2011-09-30	A	-0.571969
000002	万科A	2011-09-30	B	-0.981327
000002	万科A	2011-12-31	A	7.57242
000002	万科A	2011-12-31	B	-2.56987
000002	万科A	2012-03-31	A	-0.799521
000002	万科A	2012-03-31	B
000002	万科A	2012-06-30	A	0.951713
000002	万科A	2012-06-30	B
000002	万科A	2012-09-30	A	-0.461543
000002	万科A	2012-09-30	B	-1.02639
000002	万科A	2012-12-31	A	5.00771
000002	万科A	2012-12-31	B
000002	万科A	2013-03-31	A	-0.813754
000002	万科A	2013-03-31	B	-1.23942
000002	万科A	2013-06-30	A	0.966506
000002	万科A	2013-06-30	B
000002	万科A	2013-09-30	A	-0.391673
000002	万科A	2013-09-30	B	-1.01883
000002	万科A	2013-12-31	A	3.98763
000002	万科A	2013-12-31	B
000002	万科A	2014-03-31	A	-0.858808
000002	万科A	2014-03-31	B	-1.17856
000002	万科A	2014-06-30	A	1.39797
000002	万科A	2014-06-30	B
000002	万科A	2014-09-30	A	-0.441688
000002	万科A	2014-09-30	B	-1.01626
000002	万科A	2014-12-31	A	4.70878
000002	万科A	2014-12-31	B
000002	万科A	2015-03-31	A	-0.924144
000002	万科A	2015-03-31	B	-0.112387
000002	万科A	2015-06-30	A	5.45321
000002	万科A	2015-06-30	B	16.3053
000002	万科A	2015-09-30	A	-0.518518
000002	万科A	2015-09-30	B	-1.01036
000002	万科A	2015-12-31	A	4.71401
000002	万科A	2015-12-31	B
000002	万科A	2016-03-31	A	-0.920719
000002	万科A	2016-03-31	B	-0.91258
000002	万科A	2016-06-30	A	4.01518
000002	万科A	2016-06-30	B	63.8293
000002	万科A	2016-09-30	A	-0.287637
000002	万科A	2016-09-30	B	-0.951421
000002	万科A	2016-12-31	A	2.94997
000002	万科A	2016-12-31	B	-2.20306
000002	万科A	2017-03-31	A	-0.932907
000002	万科A	2017-03-31	B
000002	万科A	2017-06-30	A	6.76304
000002	万科A	2017-06-30	B
000002	万科A	2017-09-30	A	-0.419464
000002	万科A	2017-09-30	B	-0.996411
000002	万科A	2017-12-31	A	3.28767
000002	万科A	2017-12-31	B	9.23159
000002	万科A	2018-03-31	A	-0.901376
000002	万科A	2018-03-31	B	-0.538944
000002	万科A	2018-06-30	A	4.60677
000002	万科A	2018-06-30	B	109.395
000002	万科A	2018-09-30	A	-0.278129
000002	万科A	2018-09-30	B	-1.0259
000002	万科A	2018-12-31	A	1.98083
000002	万科A	2018-12-31	B
000002	万科A	2019-03-31	A	-0.835804
000002	万科A	2019-03-31	B
000002	万科A	2019-06-30	A	2.73296
000002	万科A	2019-06-30	B
000002	万科A	2019-09-30	A	-0.358004
000002	万科A	2019-09-30	B	-0.95987
000002	万科A	2019-12-31	A	1.45674
000002	万科A	2019-12-31	B	-2.62885
000002	万科A	2020-03-31	A	-0.86081
000002	万科A	2020-03-31	B
000002	万科A	2020-06-30	A	3.5075
000002	万科A	2020-06-30	B
000002	万科A	2020-09-30	A	-0.282917
000002	万科A	2020-09-30	B	-1.00388
000002	万科A	2020-12-31	A	1.42495
000002	万科A	2020-12-31	B
000002	万科A	2021-03-31	A	-0.892998
000002	万科A	2021-03-31	B
000002	万科A	2021-06-30	A	3.43548
000002	万科A	2021-06-30	B	343.49
000002	万科A	2021-09-30	A	-0.38983
000002	万科A	2021-12-31	A	0.789889
000002	万科A	2021-12-31	B
000002	万科A	2022-03-31	A	-0.797412
000002	万科A	2022-06-30	A	4.10549
000002	万科A	2022-06-30	B
000002	万科A	2022-09-30	A	-0.348262
000002	万科A	2022-12-31	A	0.102244
000002	万科A	2022-12-31	B
000002	万科A	2023-03-31	A	-0.719014
000002	万科A	2023-06-30	A	2.97055
000002	万科A	2023-06-30	B
000002	万科A	2023-09-30	A	-0.51507
000002	万科A	2023-12-31	A	-0.868066
000002	万科A	2023-12-31	B
000002	万科A	2024-03-31	A	-0.345922
000002	万科A	2024-06-30	A	-13.3689
000002	万科A	2024-06-30	B
000002	万科A	2024-09-30	A
000004	深安达A	1991-12-31	A
000004	深安达A	1992-12-31	A
000004	深安达A	1993-12-31	A
000004	深安达A	1994-12-31	A
000004	深安达A	1995-06-30	A
000004	深安达A	1995-12-31	A
000004	深安达A	1996-06-30	A
000004	深安达A	1996-12-31	A
000004	深安达A	1997-06-30	A
000004	深安达A	1997-12-31	A
000004	深安达A	1998-06-30	A
000004	深安达A	1998-12-31	A
000004	ST 深安达	1999-06-30	A
000004	ST 深安达	1999-12-31	A
000004	ST 深安达	2000-06-30	A
000004	ST 深安达	2000-12-31	A
000004	北大高科	2001-06-30	A
000004	北大高科	2001-12-31	A
000004	北大高科	2002-03-31	A
000004	北大高科	2002-06-30	A
000004	北大高科	2002-09-30	A
000004	北大高科	2002-12-31	A	0.6861
000004	北大高科	2003-03-31	A	-1.49238
000004	北大高科	2003-06-30	A
000004	北大高科	2003-09-30	A
000004	北大高科	2003-09-30	B
000004	北大高科	2003-12-31	A
000004	北大高科	2003-12-31	B
000004	北大高科	2004-03-31	A	-1.5641
000004	北大高科	2004-03-31	B	-1.60787
000004	北大高科	2004-06-30	A
000004	北大高科	2004-06-30	B
000004	北大高科	2004-09-30	A	2.20596
000004	北大高科	2004-09-30	B	0.879914
000004	北大高科	2004-12-31	A	-4.19411
000004	北大高科	2004-12-31	B	-2.69502
000004	北大高科	2005-03-31	A
000004	北大高科	2005-03-31	B
000004	北大高科	2005-06-30	A
000004	北大高科	2005-06-30	B
000004	国农科技	2005-09-30	A
000004	国农科技	2005-09-30	B
000004	国农科技	2005-12-31	A
000004	国农科技	2005-12-31	B
000004	国农科技	2006-03-31	B
000004	*ST 国农	2006-06-30	A	-2.0002
000004	*ST 国农	2006-06-30	B	-49.1951
000004	G*ST 国农	2006-09-30	A
000004	G*ST 国农	2006-09-30	B
000004	*ST 国农	2006-12-31	A
000004	*ST 国农	2006-12-31	B
000004	*ST 国农	2007-03-31	A	-0.934376
000004	*ST 国农	2007-03-31	B	-1.22401
000004	ST 国农	2007-06-30	A	-7.85093
000004	ST 国农	2007-06-30	B
000004	ST 国农	2007-09-30	A
000004	ST 国农	2007-09-30	B
000004	ST 国农	2007-12-31	A
000004	ST 国农	2007-12-31	B
000004	ST 国农	2008-03-31	A
000004	ST 国农	2008-03-31	B
000004	ST 国农	2008-06-30	A	-5.56791
000004	ST 国农	2008-06-30	B
000004	ST 国农	2008-09-30	A
000004	ST 国农	2008-09-30	B	-1.15418
000004	ST 国农	2008-12-31	A
000004	ST 国农	2008-12-31	B
000004	ST 国农	2009-03-31	A
000004	ST 国农	2009-03-31	B
000004	*ST 国农	2009-06-30	A	2.71076
000004	*ST 国农	2009-06-30	B
000004	*ST 国农	2009-09-30	A	-1.85589
000004	*ST 国农	2009-09-30	B
000004	*ST 国农	2009-12-31	A
000004	*ST 国农	2009-12-31	B
000004	*ST 国农	2010-03-31	A	-0.805184
000004	*ST 国农	2010-03-31	B
000004	ST 国农	2010-06-30	A	2.8445
000004	ST 国农	2010-06-30	B
000004	ST 国农	2010-09-30	A	1.59886
000004	ST 国农	2010-09-30	B
000004	ST 国农	2010-12-31	A	-0.910888
000004	ST 国农	2010-12-31	B
000004	ST 国农	2011-03-31	A	0.486065
000004	ST 国农	2011-03-31	B
000004	国农科技	2011-06-30	A	0.287787
000004	国农科技	2011-06-30	B
000004	国农科技	2011-09-30	A	-0.225896
000004	国农科技	2011-09-30	B
000004	国农科技	2011-12-31	A	1.68274
000004	国农科技	2011-12-31	B
000004	国农科技	2012-03-31	A	-0.777831
000004	国农科技	2012-03-31	B
000004	国农科技	2012-06-30	A	-0.102538
000004	国农科技	2012-06-30	B
000004	国农科技	2012-09-30	A	1.70557
000004	国农科技	2012-09-30	B
000004	国农科技	2012-12-31	A	1.88579
000004	国农科技	2012-12-31	B
000004	国农科技	2013-03-31	A	-0.567337
000004	国农科技	2013-03-31	B
000004	国农科技	2013-06-30	A	-0.414083
000004	国农科技	2013-06-30	B
000004	国农科技	2013-09-30	A	0.947709
000004	国农科技	2013-09-30	B
000004	国农科技	2013-12-31	A	-0.702606
000004	国农科技	2013-12-31	B	92.6542
000004	国农科技	2014-03-31	A	-3.33826
000004	国农科技	2014-03-31	B	-0.970793
000004	国农科技	2014-06-30	A
000004	国农科技	2014-06-30	B	8.55408
000004	国农科技	2014-09-30	A
000004	国农科技	2014-09-30	B	-0.987279
000004	国农科技	2014-12-31	A	3.45829
000004	国农科技	2014-12-31	B	-8.99032
000004	国农科技	2015-03-31	A	-1.19434
000004	国农科技	2015-03-31	B
000004	国农科技	2015-06-30	A
000004	国农科技	2015-06-30	B
000004	国农科技	2015-09-30	A	-0.634375
000004	国农科技	2015-09-30	B
000004	国农科技	2015-12-31	A	-0.721489
000004	国农科技	2015-12-31	B
000004	国农科技	2016-03-31	A	-4.53352
000004	国农科技	2016-03-31	B	-0.485173
000004	国农科技	2016-06-30	A
000004	国农科技	2016-06-30	B	-1.26837
000004	国农科技	2016-09-30	A	2.28721
000004	国农科技	2016-09-30	B
000004	国农科技	2016-12-31	A	0.076061
000004	国农科技	2016-12-31	B
000004	国农科技	2017-03-31	A	-1.06877
000004	国农科技	2017-03-31	B	-1.01842
000004	国农科技	2017-06-30	A
000004	国农科技	2017-06-30	B
000004	国农科技	2017-09-30	A
000004	国农科技	2017-09-30	B
000004	国农科技	2017-12-31	A
000004	国农科技	2017-12-31	B
000004	国农科技	2018-03-31	A	-0.994654
000004	国农科技	2018-03-31	B
000004	国农科技	2018-06-30	A	-24.062
000004	国农科技	2018-06-30	B	-1.36075
000004	国农科技	2018-09-30	A
000004	国农科技	2018-09-30	B
000004	国农科技	2018-12-31	A
000004	国农科技	2018-12-31	B
000004	国农科技	2019-03-31	A
000004	国农科技	2019-03-31	B
000004	国农科技	2019-06-30	A	-1.75299
000004	国农科技	2019-06-30	B	-1.12285
000004	国农科技	2019-09-30	A
000004	国农科技	2019-09-30	B
000004	国农科技	2019-12-31	A
000004	国农科技	2019-12-31	B
000004	国农科技	2020-03-31	A	-0.62902
000004	国农科技	2020-03-31	B	-1.70633
000004	国农科技	2020-06-30	A	-1.20609
000004	国农科技	2020-06-30	B
000004	国农科技	2020-09-30	A
000004	国农科技	2020-09-30	B
000004	国华网安	2020-12-31	A	-0.961842
000004	国华网安	2020-12-31	B
000004	国华网安	2021-03-31	A	1.22882
000004	国华网安	2021-03-31	B
000004	国华网安	2021-06-30	A	-0.603948
000004	国华网安	2021-06-30	B
000004	国华网安	2021-09-30	A	13.4094
000004	国华网安	2021-12-31	A	-20.3143
000004	国华网安	2021-12-31	B
000004	国华网安	2022-03-31	A
000004	ST 国华	2022-06-30	A
000004	ST 国华	2022-06-30	B
000004	ST 国华	2022-09-30	A
000004	ST 国华	2022-12-31	A
000004	ST 国华	2022-12-31	B
000004	ST 国华	2023-03-31	A
000004	国华网安	2023-06-30	A
000004	国华网安	2023-06-30	B
000004	国华网安	2023-09-30	A
000004	国华网安	2023-12-31	A
000004	国华网安	2023-12-31	B
000004	国华网安	2024-03-31	A
000004	国华网安	2024-06-30	A
000004	国华网安	2024-06-30	B
000004	国华网安	2024-09-30	A
000006	深振业A	1993-12-31	A
000006	深振业A	1994-12-31	A
000006	深振业A	1995-06-30	A
000006	深振业A	1995-12-31	A
000006	深振业A	1996-06-30	A
000006	深振业A	1996-12-31	A
000006	深振业A	1997-06-30	A
000006	深振业A	1997-12-31	A
000006	深振业A	1998-06-30	A
000006	深振业A	1998-12-31	A
000006	深振业A	1999-06-30	A
000006	深振业A	1999-12-31	A
000006	深振业A	2000-06-30	A
000006	深振业A	2000-12-31	A
000006	深振业A	2001-06-30	A
000006	深振业A	2001-12-31	A
000006	深振业A	2002-03-31	A
000006	深振业A	2002-06-30	A	-1.87271
000006	深振业A	2002-09-30	A
000006	深振业A	2002-12-31	A	0.933231
000006	深振业A	2003-03-31	A	-1.29425
000006	深振业A	2003-06-30	A
000006	深振业A	2003-09-30	A	-1.62089
000006	深振业A	2003-09-30	B
000006	深振业A	2003-12-31	A
000006	深振业A	2003-12-31	B
000006	深振业A	2004-03-31	A
000006	深振业A	2004-03-31	B
000006	深振业A	2004-06-30	A
000006	深振业A	2004-06-30	B
000006	深振业A	2004-09-30	A
000006	深振业A	2004-09-30	B
000006	深振业A	2004-12-31	A	1.18907
000006	深振业A	2004-12-31	B	8.23913
000006	深振业A	2005-03-31	A	-0.875269
000006	深振业A	2005-03-31	B	-0.796535
000006	深振业A	2005-06-30	A	-1.38112
000006	深振业A	2005-06-30	B	-1.60325
000006	深振业A	2005-09-30	A
000006	深振业A	2005-09-30	B
000006	深振业A	2005-12-31	A	2.44884
000006	深振业A	2005-12-31	B	4.4027
000006	G 深振业	2006-03-31	A	-0.574533
000006	G 深振业	2006-03-31	B	-0.551832
000006	G 深振业	2006-06-30	A	2.78519
000006	G 深振业	2006-06-30	B	2.64689
000006	G 深振业	2006-09-30	A	-0.951028
000006	G 深振业	2006-09-30	B	-0.944867
000006	深振业A	2006-12-31	A	4.24303
000006	深振业A	2006-12-31	B	3.09115
000006	深振业A	2007-03-31	A	-0.633286
000006	深振业A	2007-03-31	B	-0.548014
000006	深振业A	2007-06-30	A	3.63057
000006	深振业A	2007-06-30	B	3.52336
000006	深振业A	2007-09-30	A	-0.251888
000006	深振业A	2007-09-30	B	-0.286081
000006	深振业A	2007-12-31	A	1.87475
000006	深振业A	2007-12-31	B	1.14542
000006	深振业A	2008-03-31	A	0.880166
000006	深振业A	2008-03-31	B	1.51572
000006	深振业A	2008-06-30	A	-0.974843
000006	深振业A	2008-06-30	B	-0.963882
000006	深振业A	2008-09-30	A	-1.11029
000006	深振业A	2008-09-30	B	-0.797725
000006	深振业A	2008-12-31	A
000006	深振业A	2008-12-31	B	26.9567
000006	深振业A	2009-03-31	A
000006	深振业A	2009-03-31	B	0.136487
000006	深振业A	2009-06-30	A	-0.326636
000006	深振业A	2009-06-30	B	-0.36343
000006	深振业A	2009-09-30	A	-0.229038
000006	深振业A	2009-09-30	B	-0.006835
000006	深振业A	2009-12-31	A	4.23378
000006	深振业A	2009-12-31	B	1.8519
000006	深振业A	2010-03-31	A	-0.772951
000006	深振业A	2010-03-31	B	-0.585133
000006	深振业A	2010-06-30	A	0.726417
000006	深振业A	2010-06-30	B	0.873524
000006	深振业A	2010-09-30	A	-0.457448
000006	深振业A	2010-09-30	B	-0.573275
000006	深振业A	2010-12-31	A	10.2588
000006	深振业A	2010-12-31	B	2.80006
000006	深振业A	2011-03-31	A	-0.84887
000006	深振业A	2011-03-31	B	-0.533228
000006	深振业A	2011-06-30	A	0.650084
000006	深振业A	2011-06-30	B	1.2925
000006	深振业A	2011-09-30	A	0.453326
000006	深振业A	2011-09-30	B	0.157676
000006	深振业A	2011-12-31	A	0.190799
000006	深振业A	2011-12-31	B	0.210971
000006	深振业A	2012-03-31	A	-0.416682
000006	深振业A	2012-03-31	B	-0.764528
000006	深振业A	2012-06-30	A	1.24179
000006	深振业A	2012-06-30	B	0.721517
000006	深振业A	2012-09-30	A	-0.629245
000006	深振业A	2012-09-30	B	-0.318694
000006	深振业A	2012-12-31	A	2.64005
000006	深振业A	2012-12-31	B	2.509
000006	深振业A	2013-03-31	A	-0.768815
000006	深振业A	2013-03-31	B	-0.761689
000006	深振业A	2013-06-30	A	2.26521
000006	深振业A	2013-06-30	B	4.78636
000006	深振业A	2013-09-30	A	-0.56553
000006	深振业A	2013-09-30	B	-0.829773
000006	深振业A	2013-12-31	A	2.83209
000006	深振业A	2013-12-31	B	-0.483829
000006	深振业A	2014-03-31	A	-0.938028
000006	深振业A	2014-03-31	B	-1.24056
000006	深振业A	2014-06-30	A	-0.187064
000006	深振业A	2014-06-30	B
000006	深振业A	2014-09-30	A	9.95631
000006	深振业A	2014-09-30	B	7.73516
000006	深振业A	2014-12-31	A	0.48926
000006	深振业A	2014-12-31	B	-0.512584
000006	深振业A	2015-03-31	A	-0.242067
000006	深振业A	2015-03-31	B	-0.388409
000006	深振业A	2015-06-30	A	-0.711308
000006	深振业A	2015-06-30	B	-0.610042
000006	深振业A	2015-09-30	A	-0.686738
000006	深振业A	2015-09-30	B	0.104246
000006	深振业A	2015-12-31	A	7.01803
000006	深振业A	2015-12-31	B	0.431737
000006	深振业A	2016-03-31	A	-0.713923
000006	深振业A	2016-03-31	B	0.088578
000006	深振业A	2016-06-30	A	0.414719
000006	深振业A	2016-06-30	B	-0.6495
000006	深振业A	2016-09-30	A	-0.746324
000006	深振业A	2016-09-30	B	-1.77821
000006	深振业A	2016-12-31	A	34.7466
000006	深振业A	2016-12-31	B
000006	深振业A	2017-03-31	A	-0.796125
000006	深振业A	2017-03-31	B	-1.03943
000006	深振业A	2017-06-30	A	0.34581
000006	深振业A	2017-06-30	B
000006	深振业A	2017-09-30	A	-0.45494
000006	深振业A	2017-09-30	B	-14.067
000006	深振业A	2017-12-31	A	3.3909
000006	深振业A	2017-12-31	B
000006	深振业A	2018-03-31	A	-0.393163
000006	深振业A	2018-03-31	B	-0.361954
000006	深振业A	2018-06-30	A	-0.286144
000006	深振业A	2018-06-30	B	-1.13143
000006	深振业A	2018-09-30	A	-0.40298
000006	深振业A	2018-09-30	B
000006	深振业A	2018-12-31	A	2.37109
000006	深振业A	2018-12-31	B
000006	深振业A	2019-03-31	A	-0.688783
000006	深振业A	2019-03-31	B	-0.901018
000006	深振业A	2019-06-30	A	-0.044404
000006	深振业A	2019-06-30	B	-2.7057
000006	深振业A	2019-09-30	A	1.63694
000006	深振业A	2019-09-30	B
000006	深振业A	2019-12-31	A	0.52081
000006	深振业A	2019-12-31	B	-1.07762
000006	深振业A	2020-03-31	A	-0.622623
000006	深振业A	2020-03-31	B
000006	深振业A	2020-06-30	A	-0.364913
000006	深振业A	2020-06-30	B
000006	深振业A	2020-09-30	A	1.59371
000006	深振业A	2020-09-30	B
000006	深振业A	2020-12-31	A	0.425894
000006	深振业A	2020-12-31	B	-0.047556
000006	深振业A	2021-03-31	A	-0.194422
000006	深振业A	2021-03-31	B	-0.85488
000006	深振业A	2021-06-30	A	-0.616809
000006	深振业A	2021-06-30	B	21.0294
000006	深振业A	2021-09-30	A	0.642198
000006	深振业A	2021-12-31	A	-0.923289
000006	深振业A	2021-12-31	B
000006	深振业A	2022-03-31	A	2.18874
000006	深振业A	2022-06-30	A	3.60814
000006	深振业A	2022-06-30	B
000006	深振业A	2022-09-30	A	-1.13652
000006	深振业A	2022-12-31	A
000006	深振业A	2022-12-31	B
000006	深振业A	2023-03-31	A	-1.04302
000006	深振业A	2023-06-30	A
000006	深振业A	2023-06-30	B
000006	深振业A	2023-09-30	A	-1.35611
000006	深振业A	2023-12-31	A
000006	深振业A	2023-12-31	B
000006	深振业A	2024-03-31	A
000006	深振业A	2024-06-30	A
000006	深振业A	2024-06-30	B
000006	深振业A	2024-09-30	A
000007	深达声A	1993-12-31	A
000007	深达声A	1994-12-31	A
000007	深达声A	1995-06-30	A
000007	深达声A	1995-12-31	A
000007	深达声A	1996-06-30	A
000007	深达声A	1996-12-31	A
000007	深达声A	1997-06-30	A
000007	深达声A	1997-12-31	A
000007	深达声A	1998-06-30	A
000007	深达声A	1998-12-31	A
000007	深达声A	1999-06-30	A
000007	深达声A	1999-12-31	A
000007	深达声A	2000-06-30	A
000007	深达声A	2000-12-31	A
000007	ST 达声	2001-06-30	A
000007	ST 达声	2001-12-31	A
000007	ST 达声	2002-03-31	A
000007	深达声A	2002-06-30	A	1.49034
000007	深达声A	2002-09-30	A	-0.465736
000007	深达声A	2002-12-31	A	-1.20158
000007	深达声A	2003-03-31	A
000007	深达声A	2003-06-30	A	-0.341176
000007	深达声A	2003-09-30	A	-1.28157
000007	深达声A	2003-09-30	B
000007	深达声A	2003-12-31	A
000007	深达声A	2003-12-31	B
000007	深达声A	2004-03-31	A	-1.35001
000007	深达声A	2004-03-31	B
000007	深达声A	2004-06-30	A
000007	深达声A	2004-06-30	B
000007	深达声A	2004-09-30	A
000007	深达声A	2004-09-30	B
000007	深达声A	2004-12-31	A
000007	深达声A	2004-12-31	B
000007	深达声A	2005-03-31	A
000007	深达声A	2005-03-31	B
000007	深达声A	2005-06-30	A
000007	深达声A	2005-06-30	B
000007	深达声A	2005-09-30	B
000007	深达声A	2005-12-31	A
000007	深达声A	2005-12-31	B
000007	深达声A	2006-03-31	A	-1.12922
000007	深达声A	2006-03-31	B	-1.2927
000007	深达声A	2006-06-30	A
000007	深达声A	2006-06-30	B
000007	G 深达声	2006-09-30	A
000007	G 深达声	2006-09-30	B
000007	深达声A	2006-12-31	A
000007	深达声A	2006-12-31	B
000007	深达声A	2007-03-31	A
000007	深达声A	2007-03-31	B
000007	ST 达声	2007-06-30	A
000007	ST 达声	2007-06-30	B
000007	ST 达声	2007-09-30	A
000007	ST 达声	2007-09-30	B
000007	ST 达声	2007-12-31	A
000007	ST 达声	2007-12-31	B
000007	ST 达声	2008-03-31	A	-1.34764
000007	ST 达声	2008-03-31	B	-1.31825
000007	ST 达声	2008-06-30	A
000007	ST 达声	2008-06-30	B
000007	ST 达声	2008-09-30	A
000007	ST 达声	2008-09-30	B	-6.42675
000007	ST 达声	2008-12-31	A
000007	ST 达声	2008-12-31	B
000007	ST 达声	2009-03-31	A
000007	ST 达声	2009-03-31	B	-1.05328
000007	ST 达声	2009-06-30	A
000007	ST 达声	2009-06-30	B
000007	ST 达声	2009-09-30	A
000007	ST 达声	2009-09-30	B
000007	ST 达声	2009-12-31	A
000007	ST 达声	2009-12-31	B	-4.91596
000007	ST 零七	2010-03-31	A
000007	ST 零七	2010-03-31	B
000007	ST 零七	2010-06-30	A
000007	ST 零七	2010-06-30	B
000007	ST 零七	2010-09-30	A	-1.35102
000007	ST 零七	2010-09-30	B
000007	ST 零七	2010-12-31	A
000007	ST 零七	2010-12-31	B
000007	ST 零七	2011-03-31	A
000007	ST 零七	2011-03-31	B
000007	ST 零七	2011-06-30	A
000007	ST 零七	2011-06-30	B
000007	ST 零七	2011-09-30	A	-0.99896
000007	ST 零七	2011-09-30	B	-16.125
000007	ST 零七	2011-12-31	A	3081.45
000007	ST 零七	2011-12-31	B
000007	ST 零七	2012-03-31	A	-0.948606
000007	ST 零七	2012-03-31	B	-0.959913
000007	零七股份	2012-06-30	A	10.6693
000007	零七股份	2012-06-30	B	2.42094
000007	零七股份	2012-09-30	A	0.247447
000007	零七股份	2012-09-30	B	-1.01765
000007	零七股份	2012-12-31	A	-1.56039
000007	零七股份	2012-12-31	B
000007	零七股份	2013-03-31	A
000007	零七股份	2013-03-31	B	-2.02288
000007	零七股份	2013-06-30	A
000007	零七股份	2013-06-30	B
000007	零七股份	2013-09-30	A	-2.68956
000007	零七股份	2013-09-30	B	-2.17997
000007	零七股份	2013-12-31	A
000007	零七股份	2013-12-31	B
000007	零七股份	2014-03-31	A	-1.39699
000007	零七股份	2014-03-31	B	-1.03872
000007	零七股份	2014-06-30	A
000007	零七股份	2014-06-30	B
000007	零七股份	2014-09-30	A	-1.63206
000007	零七股份	2014-09-30	B
000007	零七股份	2014-12-31	A
000007	零七股份	2014-12-31	B	-2.21383
000007	零七股份	2015-03-31	A
000007	零七股份	2015-03-31	B
000007	零七股份	2015-06-30	A
000007	零七股份	2015-06-30	B
000007	零七股份	2015-09-30	A
000007	零七股份	2015-09-30	B
000007	零七股份	2015-12-31	A	-0.580481
000007	零七股份	2015-12-31	B	-0.622224
000007	全新好	2016-03-31	A	2.23739
000007	全新好	2016-03-31	B	-1.04243
000007	全新好	2016-06-30	A	-0.461308
000007	全新好	2016-06-30	B
000007	全新好	2016-09-30	A	-0.716936
000007	全新好	2016-09-30	B
000007	全新好	2016-12-31	A	18.5918
000007	全新好	2016-12-31	B
000007	全新好	2017-03-31	A	-1.09017
000007	全新好	2017-03-31	B	-1.00185
000007	全新好	2017-06-30	A
000007	全新好	2017-06-30	B
000007	全新好	2017-09-30	A	-2.01537
000007	全新好	2017-09-30	B	-1.51189
000007	全新好	2017-12-31	A
000007	全新好	2017-12-31	B
000007	全新好	2018-03-31	A	-1.8045
000007	全新好	2018-03-31	B	-1.21497
000007	全新好	2018-06-30	A
000007	全新好	2018-06-30	B
000007	全新好	2018-09-30	A
000007	全新好	2018-09-30	B	1.36112
000007	全新好	2018-12-31	A	-15.2416
000007	全新好	2018-12-31	B	-6.5527
000007	全新好	2019-03-31	A
000007	全新好	2019-03-31	B
000007	全新好	2019-06-30	A	-0.59986
000007	全新好	2019-06-30	B	3.43138
000007	全新好	2019-09-30	A	-0.698994
000007	全新好	2019-09-30	B	-0.050427
000007	全新好	2019-12-31	A	15.203
000007	全新好	2019-12-31	B	-2.25414
000007	全新好	2020-03-31	A	-2.23494
000007	全新好	2020-03-31	B
000007	全新好	2020-06-30	A
000007	全新好	2020-06-30	B
000007	全新好	2020-09-30	A
000007	全新好	2020-09-30	B	0.576783
000007	全新好	2020-12-31	A
000007	全新好	2020-12-31	B	-11.9691
000007	全新好	2021-03-31	A
000007	全新好	2021-03-31	B
000007	*ST 全新	2021-06-30	A
000007	*ST 全新	2021-06-30	B	-4.64014
000007	*ST 全新	2021-09-30	A
000007	*ST 全新	2021-12-31	A	206.712
000007	*ST 全新	2021-12-31	B
000007	*ST 全新	2022-03-31	A	-1.02616
000007	*ST 全新	2022-06-30	A
000007	*ST 全新	2022-06-30	B
000007	全新好	2022-09-30	A
000007	全新好	2022-12-31	A	2.65515
000007	全新好	2022-12-31	B
000007	全新好	2023-03-31	A	-0.740657
000007	*ST 全新	2023-06-30	A	4.98825
000007	*ST 全新	2023-06-30	B
000007	*ST 全新	2023-09-30	A	-0.864052
000007	*ST 全新	2023-12-31	A	13.5838
000007	*ST 全新	2023-12-31	B
000007	*ST 全新	2024-03-31	A	-0.967806
000007	*ST 全新	2024-06-30	A	1.84643
000007	*ST 全新	2024-06-30	B
000007	全新好	2024-09-30	A	-0.199
000008	深锦兴A	1992-12-31	A
000008	深锦兴A	1993-12-31	A
000008	深锦兴A	1994-12-31	A
000008	深锦兴A	1995-06-30	A
000008	深锦兴A	1995-12-31	A
000008	深锦兴A	1996-06-30	A
000008	深锦兴A	1996-12-31	A
000008	深锦兴A	1997-06-30	A
000008	深锦兴A	1997-12-31	A
000008	深锦兴A	1998-06-30	A
000008	深锦兴A	1998-12-31	A
000008	深锦兴A	1999-06-30	A
000008	亿安科技	1999-12-31	A
000008	亿安科技	2000-06-30	A
000008	亿安科技	2000-12-31	A
000008	亿安科技	2001-06-30	A
000008	亿安科技	2001-12-31	A
000008	亿安科技	2002-03-31	A
000008	ST 亿安	2002-06-30	A	-3.71177
000008	ST 亿安	2002-09-30	A
000008	ST 亿安	2002-12-31	A
000008	ST 亿安	2003-03-31	A
000008	*ST 亿安	2003-06-30	A
000008	*ST 亿安	2003-09-30	A
000008	*ST 亿安	2003-12-31	A	-0.186609
000008	*ST 亿安	2003-12-31	B
000008	ST 亿安	2004-03-31	A	-0.781887
000008	ST 亿安	2004-03-31	B	-0.781887
000008	ST 亿安	2004-06-30	A	0.172044
000008	ST 亿安	2004-06-30	B	0.172044
000008	ST 亿安	2004-09-30	A	1.75592
000008	ST 亿安	2004-09-30	B	1.75501
000008	ST 亿安	2004-12-31	A	45.9818
000008	ST 亿安	2004-12-31	B	45.9973
000008	亿安科技	2005-03-31	A	-0.972167
000008	亿安科技	2005-03-31	B	-0.972165
000008	宝利来	2005-06-30	A	-1.37871
000008	宝利来	2005-06-30	B	-1.36026
000008	宝利来	2005-09-30	A
000008	宝利来	2005-09-30	B
000008	G 宝利来	2005-12-31	A
000008	G 宝利来	2005-12-31	B
000008	G 宝利来	2006-03-31	A
000008	G 宝利来	2006-03-31	B
000008	G 宝利来	2006-06-30	A
000008	G 宝利来	2006-06-30	B
000008	G 宝利来	2006-09-30	A
000008	G 宝利来	2006-09-30	B
000008	宝利来	2006-12-31	A
000008	宝利来	2006-12-31	B
000008	*ST 宝投	2007-03-31	A
000008	*ST 宝投	2007-03-31	B
000008	*ST 宝投	2007-06-30	A	-0.893474
000008	*ST 宝投	2007-06-30	B	-0.893474
000008	*ST 宝投	2007-09-30	A	10.8959
000008	*ST 宝投	2007-09-30	B	10.8959
000008	*ST 宝投	2007-12-31	A	-1.07724
000008	*ST 宝投	2007-12-31	B	-1.07724
000008	*ST 宝投	2008-03-31	A
000008	*ST 宝投	2008-03-31	B
000008	ST 宝利来	2008-06-30	A	-0.982491
000008	ST 宝利来	2008-06-30	B	-0.982491
000008	ST 宝利来	2008-09-30	A	15.4801
000008	ST 宝利来	2008-09-30	B	15.4801
000008	ST 宝利来	2008-12-31	A	3.96929
000008	ST 宝利来	2008-12-31	B	3.96929
000008	ST 宝利来	2009-03-31	A	-1.29597
000008	ST 宝利来	2009-03-31	B	-1.29597
000008	ST 宝利来	2009-06-30	A
000008	ST 宝利来	2009-06-30	B
000008	ST 宝利来	2009-09-30	A
000008	ST 宝利来	2009-09-30	B
000008	ST 宝利来	2009-12-31	A	0.905307
000008	ST 宝利来	2009-12-31	B	0.905307
000008	ST 宝利来	2010-03-31	A	-1.13187
000008	ST 宝利来	2010-03-31	B	-1.13187
000008	ST 宝利来	2010-06-30	A
000008	ST 宝利来	2010-06-30	B
000008	ST 宝利来	2010-09-30	A	0.100045
000008	ST 宝利来	2010-09-30	B	0.100045
000008	ST 宝利来	2010-12-31	A	10.1218
000008	ST 宝利来	2010-12-31	B	10.1218
000008	ST 宝利来	2011-03-31	A	-1.27944
000008	ST 宝利来	2011-03-31	B	-1.27944
000008	ST 宝利来	2011-06-30	A
000008	ST 宝利来	2011-06-30	B
000008	ST 宝利来	2011-09-30	A
000008	ST 宝利来	2011-09-30	B
000008	ST 宝利来	2011-12-31	A
000008	ST 宝利来	2011-12-31	B
000008	ST 宝利来	2012-03-31	A
000008	ST 宝利来	2012-03-31	B
000008	ST 宝利来	2012-06-30	A
000008	ST 宝利来	2012-06-30	B
000008	ST 宝利来	2012-09-30	A	-0.595444
000008	ST 宝利来	2012-09-30	B	-0.595444
000008	ST 宝利来	2012-12-31	A	1477.21
000008	ST 宝利来	2012-12-31	B	-16.7156
000008	ST 宝利来	2013-03-31	A	-0.888702
000008	ST 宝利来	2013-03-31	B
000008	宝利来	2013-06-30	A	0.45701
000008	宝利来	2013-06-30	B
000008	宝利来	2013-09-30	A	0.084856
000008	宝利来	2013-09-30	B
000008	宝利来	2013-12-31	A	-0.037651
000008	宝利来	2013-12-31	B	-0.003874
000008	宝利来	2014-03-31	A	-0.325763
000008	宝利来	2014-03-31	B	-2.32615
000008	宝利来	2014-06-30	A	0.079468
000008	宝利来	2014-06-30	B
000008	宝利来	2014-09-30	A	-0.389443
000008	宝利来	2014-09-30	B	-1.21623
000008	宝利来	2014-12-31	A	-0.187263
000008	宝利来	2014-12-31	B
000008	神州高铁	2015-03-31	A	16.3915
000008	神州高铁	2015-03-31	B	0.514151
000008	神州高铁	2015-06-30	A	-0.44647
000008	神州高铁	2015-06-30	B	-1.01046
000008	神州高铁	2015-09-30	A	0.040523
000008	神州高铁	2015-09-30	B
000008	神州高铁	2015-12-31	A	1.83312
000008	神州高铁	2015-12-31	B
000008	神州高铁	2016-03-31	A	-1.06554
000008	神州高铁	2016-03-31	B
000008	神州高铁	2016-06-30	A
000008	神州高铁	2016-06-30	B
000008	神州高铁	2016-09-30	A	4.65015
000008	神州高铁	2016-09-30	B	4.2482
000008	神州高铁	2016-12-31	A	0.472322
000008	神州高铁	2016-12-31	B	-1.23539
000008	神州高铁	2017-03-31	A	-1.0178
000008	神州高铁	2017-03-31	B
000008	神州高铁	2017-06-30	A
000008	神州高铁	2017-06-30	B
000008	神州高铁	2017-09-30	A	0.360865
000008	神州高铁	2017-09-30	B
000008	神州高铁	2017-12-31	A	8.58663
000008	神州高铁	2017-12-31	B
000008	神州高铁	2018-03-31	A	-0.980083
000008	神州高铁	2018-03-31	B	-1.03454
000008	神州高铁	2018-06-30	A	2.95642
000008	神州高铁	2018-06-30	B
000008	神州高铁	2018-09-30	A	0.256044
000008	神州高铁	2018-09-30	B	-0.902322
000008	神州高铁	2018-12-31	A	2.03882
000008	神州高铁	2018-12-31	B	-3.43576
000008	神州高铁	2019-03-31	A	-0.928452
000008	神州高铁	2019-03-31	B
000008	神州高铁	2019-06-30	A	2.70327
000008	神州高铁	2019-06-30	B
000008	神州高铁	2019-09-30	A	0.560866
000008	神州高铁	2019-09-30	B
000008	神州高铁	2019-12-31	A	2.27608
000008	神州高铁	2019-12-31	B	-0.896925
000008	神州高铁	2020-03-31	A	-1.30445
000008	神州高铁	2020-03-31	B	-8.7948
000008	神州高铁	2020-06-30	A
000008	神州高铁	2020-06-30	B
000008	神州高铁	2020-09-30	A
000008	神州高铁	2020-09-30	B
000008	神州高铁	2020-12-31	A	-8.91356
000008	神州高铁	2020-12-31	B
000008	神州高铁	2021-03-31	A
000008	神州高铁	2021-03-31	B
000008	神州高铁	2021-06-30	A
000008	神州高铁	2021-06-30	B
000008	神州高铁	2021-09-30	A
000008	神州高铁	2021-12-31	A	-19.1881
000008	神州高铁	2021-12-31	B
000008	神州高铁	2022-03-31	A
000008	神州高铁	2022-06-30	A
000008	神州高铁	2022-06-30	B
000008	神州高铁	2022-09-30	A
000008	神州高铁	2022-12-31	A
000008	神州高铁	2022-12-31	B
000008	神州高铁	2023-03-31	A
000008	神州高铁	2023-06-30	A
000008	神州高铁	2023-06-30	B
000008	神州高铁	2023-09-30	A
000008	神州高铁	2023-12-31	A
000008	神州高铁	2023-12-31	B
000008	神州高铁	2024-03-31	A
000008	神州高铁	2024-06-30	A
000008	神州高铁	2024-06-30	B
000008	神州高铁	2024-09-30	A
000009	深宝安A	1991-12-31	A
000009	深宝安A	1992-12-31	A
000009	深宝安A	1993-12-31	A
000009	深宝安A	1994-12-31	A
000009	深宝安A	1995-06-30	A
000009	深宝安A	1995-12-31	A
000009	深宝安A	1996-06-30	A
000009	深宝安A	1996-12-31	A
000009	深宝安A	1997-06-30	A
000009	深宝安A	1997-12-31	A
000009	深宝安A	1998-06-30	A
000009	深宝安A	1998-12-31	A
000009	ST 深宝安	1999-06-30	A
000009	ST 深宝安	1999-12-31	A
000009	深宝安A	2000-06-30	A
000009	深宝安A	2000-12-31	A
000009	深宝安A	2001-06-30	A
000009	深宝安A	2001-12-31	A
000009	深宝安A	2002-03-31	A
000009	深宝安A	2002-06-30	A	1.18506
000009	深宝安A	2002-09-30	A	-0.61267
000009	深宝安A	2002-12-31	A	4.81521
000009	深宝安A	2003-03-31	A	-0.493904
000009	深宝安A	2003-06-30	A	-0.6848
000009	深宝安A	2003-09-30	A	-1.02171
000009	深宝安A	2003-09-30	B
000009	深宝安A	2003-12-31	A
000009	深宝安A	2003-12-31	B
000009	深宝安A	2004-03-31	A	-0.802926
000009	深宝安A	2004-03-31	B	-0.997724
000009	深宝安A	2004-06-30	A	1.64234
000009	深宝安A	2004-06-30	B	-12.2929
000009	深宝安A	2004-09-30	A	-0.885391
000009	深宝安A	2004-09-30	B
000009	深宝安A	2004-12-31	A	21.5822
000009	深宝安A	2004-12-31	B
000009	深宝安A	2005-03-31	A	-0.810411
000009	深宝安A	2005-03-31	B	-0.976226
000009	深宝安A	2005-06-30	A	0.582277
000009	深宝安A	2005-06-30	B	-0.392051
000009	深宝安A	2005-09-30	A	-0.771611
000009	深宝安A	2005-09-30	B	-6.82702
000009	深宝安A	2005-12-31	A	21.7317
000009	深宝安A	2005-12-31	B
000009	深宝安A	2006-03-31	A	-0.784964
000009	深宝安A	2006-03-31	B	-0.886753
000009	深宝安A	2006-06-30	A	0.060676
000009	深宝安A	2006-06-30	B	-0.352358
000009	深宝安A	2006-09-30	A	-0.116774
000009	深宝安A	2006-09-30	B	-0.684175
000009	S 深宝安A	2006-12-31	A	6.74281
000009	S 深宝安A	2006-12-31	B	48.8524
000009	S 深宝安A	2007-03-31	A	-0.480012
000009	S 深宝安A	2007-03-31	B	-0.456264
000009	S 深宝安A	2007-06-30	A	0.36229
000009	S 深宝安A	2007-06-30	B	1.3429
000009	S 深宝安A	2007-09-30	A	-0.229977
000009	S 深宝安A	2007-09-30	B	-0.539368
000009	S 深宝安A	2007-12-31	A	-0.183626
000009	S 深宝安A	2007-12-31	B	-1.49002
000009	S 深宝安A	2008-03-31	A	0.260324
000009	S 深宝安A	2008-03-31	B
000009	中国宝安	2008-06-30	A	-0.119908
000009	中国宝安	2008-06-30	B	-1.18448
000009	中国宝安	2008-09-30	A	0.198328
000009	中国宝安	2008-09-30	B
000009	中国宝安	2008-12-31	A	-0.344142
000009	中国宝安	2008-12-31	B	2.91886
000009	中国宝安	2009-03-31	A	0.964176
000009	中国宝安	2009-03-31	B	-1.03819
000009	中国宝安	2009-06-30	A	0.092683
000009	中国宝安	2009-06-30	B
000009	中国宝安	2009-09-30	A	-0.41695
000009	中国宝安	2009-09-30	B
000009	中国宝安	2009-12-31	A	0.541073
000009	中国宝安	2009-12-31	B	7.83796
000009	中国宝安	2010-03-31	A	0.264584
000009	中国宝安	2010-03-31	B	-1.66686
000009	中国宝安	2010-06-30	A	0.021648
000009	中国宝安	2010-06-30	B
000009	中国宝安	2010-09-30	A	-0.411685
000009	中国宝安	2010-09-30	B	-0.656348
000009	中国宝安	2010-12-31	A	-0.144316
000009	中国宝安	2010-12-31	B	-3.08251
000009	中国宝安	2011-03-31	A	1.03288
000009	中国宝安	2011-03-31	B
000009	中国宝安	2011-06-30	A	0.100287
000009	中国宝安	2011-06-30	B
000009	中国宝安	2011-09-30	A	-0.709312
000009	中国宝安	2011-09-30	B
000009	中国宝安	2011-12-31	A	0.218808
000009	中国宝安	2011-12-31	B
000009	中国宝安	2012-03-31	A	0.420989
000009	中国宝安	2012-03-31	B	-1.10275
000009	中国宝安	2012-06-30	A	0.108615
000009	中国宝安	2012-06-30	B
000009	中国宝安	2012-09-30	A	-0.70639
000009	中国宝安	2012-09-30	B	-1.57223
000009	中国宝安	2012-12-31	A	3.51706
000009	中国宝安	2012-12-31	B
000009	中国宝安	2013-03-31	A	-0.263749
000009	中国宝安	2013-03-31	B
000009	中国宝安	2013-06-30	A	-0.399689
000009	中国宝安	2013-06-30	B
000009	中国宝安	2013-09-30	A	4.49442
000009	中国宝安	2013-09-30	B	0.650428
000009	中国宝安	2013-12-31	A	-1.11454
000009	中国宝安	2013-12-31	B	-1.13843
000009	中国宝安	2014-03-31	A
000009	中国宝安	2014-03-31	B
000009	中国宝安	2014-06-30	A	0.4739
000009	中国宝安	2014-06-30	B	4.84541
000009	中国宝安	2014-09-30	A	-0.611055
000009	中国宝安	2014-09-30	B	-0.35606
000009	中国宝安	2014-12-31	A	0.628193
000009	中国宝安	2014-12-31	B	-0.428253
000009	中国宝安	2015-03-31	A	-0.088312
000009	中国宝安	2015-03-31	B	-1.88985
000009	中国宝安	2015-06-30	A	-0.106427
000009	中国宝安	2015-06-30	B
000009	中国宝安	2015-09-30	A	6.84516
000009	中国宝安	2015-09-30	B
000009	中国宝安	2015-12-31	A	-0.928186
000009	中国宝安	2015-12-31	B	17.619
000009	中国宝安	2016-03-31	A	0.88874
000009	中国宝安	2016-03-31	B	-1.05868
000009	中国宝安	2016-06-30	A	-0.224188
000009	中国宝安	2016-06-30	B
000009	中国宝安	2016-09-30	A	1.36854
000009	中国宝安	2016-09-30	B
000009	中国宝安	2016-12-31	A	-0.75793
000009	中国宝安	2016-12-31	B
000009	中国宝安	2017-03-31	A	0.772894
000009	中国宝安	2017-03-31	B
000009	中国宝安	2017-06-30	A	0.544113
000009	中国宝安	2017-06-30	B
000009	中国宝安	2017-09-30	A	0.448767
000009	中国宝安	2017-09-30	B
000009	中国宝安	2017-12-31	A	-1.3155
000009	中国宝安	2017-12-31	B
000009	中国宝安	2018-03-31	A
000009	中国宝安	2018-03-31	B
000009	中国宝安	2018-06-30	A	1.44482
000009	中国宝安	2018-06-30	B
000009	中国宝安	2018-09-30	A	-0.969468
000009	中国宝安	2018-09-30	B	-1.40804
000009	中国宝安	2018-12-31	A	96.5478
000009	中国宝安	2018-12-31	B
000009	中国宝安	2019-03-31	A	-0.646088
000009	中国宝安	2019-03-31	B
000009	中国宝安	2019-06-30	A	0.133783
000009	中国宝安	2019-06-30	B	-1.3641
000009	中国宝安	2019-09-30	A	0.109937
000009	中国宝安	2019-09-30	B
000009	中国宝安	2019-12-31	A	-0.130693
000009	中国宝安	2019-12-31	B
000009	中国宝安	2020-03-31	A	-0.330432
000009	中国宝安	2020-03-31	B	-1.34302
000009	中国宝安	2020-06-30	A	0.537815
000009	中国宝安	2020-06-30	B
000009	中国宝安	2020-09-30	A	1.11318
000009	中国宝安	2020-09-30	B	-0.583724
000009	中国宝安	2020-12-31	A	-0.471902
000009	中国宝安	2020-12-31	B	-0.509778
000009	中国宝安	2021-03-31	A	0.393959
000009	中国宝安	2021-03-31	B	-1.4337
000009	中国宝安	2021-06-30	A	1.08153
000009	中国宝安	2021-06-30	B
000009	中国宝安	2021-09-30	A	-0.438539
000009	中国宝安	2021-12-31	A	-0.532014
000009	中国宝安	2021-12-31	B
000009	中国宝安	2022-03-31	A	1.18654
000009	中国宝安	2022-06-30	A	0.290908
000009	中国宝安	2022-06-30	B
000009	中国宝安	2022-09-30	A	-0.065755
000009	中国宝安	2022-12-31	A	0.544733
000009	中国宝安	2022-12-31	B
000009	中国宝安	2023-03-31	A	-0.37644
000009	中国宝安	2023-06-30	A	0.039106
000009	中国宝安	2023-06-30	B
000009	中国宝安	2023-09-30	A	-0.007694
000009	中国宝安	2023-12-31	A	-0.534092
000009	中国宝安	2023-12-31	B
000009	中国宝安	2024-03-31	A	0.181173
000009	中国宝安	2024-06-30	A	0.237983
000009	中国宝安	2024-06-30	B
000009	中国宝安	2024-09-30	A	-0.09104
000010	深华新A	1995-12-31	A
000010	深华新A	1996-06-30	A
000010	深华新A	1996-12-31	A
000010	深华新A	1997-06-30	A
000010	深华新A	1997-12-31	A
000010	深华新A	1998-06-30	A
000010	深华新A	1998-12-31	A
000010	深华新A	1999-06-30	A
000010	深华新A	1999-12-31	A
000010	ST 深华新	2000-06-30	A
000010	ST 深华新	2000-12-31	A
000010	深华新	2001-06-30	A
000010	深华新	2001-12-31	A
000010	深华新	2002-03-31	A
000010	深华新	2002-06-30	A	-1.92478
000010	深华新	2002-09-30	A
000010	深华新	2002-12-31	A	8.69061
000010	深华新	2003-03-31	A	-0.9051
000010	深华新	2003-06-30	A	1.91633
000010	深华新	2003-09-30	A	0.898792
000010	深华新	2003-09-30	B
000010	深华新	2003-12-31	A	-0.435874
000010	深华新	2003-12-31	B
000010	深华新	2004-03-31	A	-0.135293
000010	深华新	2004-03-31	B
000010	深华新	2004-06-30	A	-0.632483
000010	深华新	2004-06-30	B	-8.84578
000010	深华新	2004-09-30	A	2.32691
000010	深华新	2004-09-30	B
000010	深华新	2004-12-31	A	-1.57678
000010	深华新	2004-12-31	B	-101.133
000010	深华新	2005-03-31	A
000010	深华新	2005-03-31	B
000010	深华新	2005-06-30	A	1.68219
000010	深华新	2005-06-30	B
000010	深华新	2005-09-30	A	0.350489
000010	深华新	2005-09-30	B
000010	深华新	2005-12-31	A	-6.49975
000010	深华新	2005-12-31	B
000010	深华新	2006-03-31	B
000010	*ST 华新	2006-06-30	A	-6.05622
000010	*ST 华新	2006-06-30	B	-6.69555
000010	*ST 华新	2006-09-30	A
000010	*ST 华新	2006-09-30	B
000010	S*ST 华新	2006-12-31	A
000010	S*ST 华新	2006-12-31	B
000010	SST 华新	2007-03-31	A	-1.03071
000010	SST 华新	2007-03-31	B	-1.03818
000010	SST 华新	2007-06-30	A
000010	SST 华新	2007-06-30	B
000010	SST 华新	2007-09-30	A	-1.00723
000010	SST 华新	2007-09-30	B	-1.76887
000010	SST 华新	2007-12-31	A
000010	SST 华新	2007-12-31	B
000010	SST 华新	2008-03-31	A
000010	SST 华新	2008-03-31	B
000010	SST 华新	2008-06-30	A	-2.55123
000010	SST 华新	2008-06-30	B
000010	SST 华新	2008-09-30	A
000010	SST 华新	2008-09-30	B
000010	SST 华新	2008-12-31	A	-0.302872
000010	SST 华新	2008-12-31	B	-0.843792
000010	SST 华新	2009-03-31	A	-0.687149
000010	SST 华新	2009-03-31	B	-1.32362
000010	SST 华新	2009-06-30	A	1.41593
000010	SST 华新	2009-06-30	B
000010	SST 华新	2009-09-30	A	-0.703728
000010	SST 华新	2009-09-30	B
000010	SST 华新	2009-12-31	A	-1.25514
000010	SST 华新	2009-12-31	B	-18.3301
000010	SST 华新	2010-03-31	A
000010	SST 华新	2010-03-31	B
000010	SST 华新	2010-06-30	A
000010	SST 华新	2010-06-30	B
000010	SST 华新	2010-09-30	A
000010	SST 华新	2010-09-30	B
000010	SST 华新	2010-12-31	A	0.097521
000010	SST 华新	2010-12-31	B	-6.52211
000010	SST 华新	2011-03-31	A	-2.32259
000010	SST 华新	2011-03-31	B
000010	SST 华新	2011-06-30	A
000010	SST 华新	2011-06-30	B
000010	SST 华新	2011-09-30	A
000010	SST 华新	2011-09-30	B
000010	SST 华新	2011-12-31	A	-0.443887
000010	SST 华新	2011-12-31	B	-2.65041
000010	SST 华新	2012-03-31	A	-1.83587
000010	SST 华新	2012-03-31	B
000010	SST 华新	2012-06-30	A
000010	SST 华新	2012-06-30	B
000010	SST 华新	2012-09-30	A
000010	SST 华新	2012-09-30	B
000010	SST 华新	2012-12-31	A
000010	SST 华新	2012-12-31	B
000010	SST 华新	2013-03-31	A	-1.63317
000010	SST 华新	2013-03-31	B	-2.53736
000010	SST 华新	2013-06-30	A
000010	SST 华新	2013-06-30	B
000010	ST 华新	2013-09-30	A	-0.881071
000010	ST 华新	2013-09-30	B
000010	深华新	2013-12-31	A	8.92087
000010	深华新	2013-12-31	B
000010	深华新	2014-03-31	A	-1.59026
000010	深华新	2014-03-31	B
000010	深华新	2014-06-30	A
000010	深华新	2014-06-30	B
000010	深华新	2014-09-30	A
000010	深华新	2014-09-30	B
000010	深华新	2014-12-31	A
000010	深华新	2014-12-31	B
000010	深华新	2015-03-31	A
000010	深华新	2015-03-31	B
000010	深华新	2015-06-30	A	4.65308
000010	深华新	2015-06-30	B
000010	深华新	2015-09-30	A	-0.759339
000010	深华新	2015-09-30	B
000010	深华新	2015-12-31	A	4.6254
000010	深华新	2015-12-31	B
000010	深华新	2016-03-31	A	-3.90066
000010	深华新	2016-03-31	B
000010	美丽生态	2016-06-30	A
000010	美丽生态	2016-06-30	B
000010	美丽生态	2016-09-30	A	-0.997505
000010	美丽生态	2016-09-30	B
000010	美丽生态	2016-12-31	A	138.323
000010	美丽生态	2016-12-31	B
000010	美丽生态	2017-03-31	A	-2.0667
000010	美丽生态	2017-03-31	B
000010	美丽生态	2017-06-30	A
000010	美丽生态	2017-06-30	B
000010	美丽生态	2017-09-30	A
000010	美丽生态	2017-09-30	B
000010	美丽生态	2017-12-31	A	-14.3575
000010	美丽生态	2017-12-31	B
000010	美丽生态	2018-03-31	A
000010	美丽生态	2018-03-31	B
000010	美丽生态	2018-06-30	A
000010	美丽生态	2018-06-30	B
000010	美丽生态	2018-09-30	A
000010	美丽生态	2018-09-30	B
000010	美丽生态	2018-12-31	A
000010	美丽生态	2018-12-31	B
000010	美丽生态	2019-03-31	A
000010	美丽生态	2019-03-31	B
000010	*ST 美丽	2019-06-30	A	1.38575
000010	*ST 美丽	2019-06-30	B
000010	*ST 美丽	2019-09-30	A	0.967045
000010	*ST 美丽	2019-09-30	B
000010	*ST 美丽	2019-12-31	A	-0.658237
000010	*ST 美丽	2019-12-31	B
000010	*ST 美丽	2020-03-31	A	-1.90011
000010	*ST 美丽	2020-03-31	B
000010	*ST 美丽	2020-06-30	A
000010	*ST 美丽	2020-06-30	B
000010	美丽生态	2020-09-30	A	-0.161077
000010	美丽生态	2020-09-30	B	-23.0402
000010	美丽生态	2020-12-31	A	-0.490348
000010	美丽生态	2020-12-31	B
000010	美丽生态	2021-03-31	A	-0.506967
000010	美丽生态	2021-03-31	B
000010	美丽生态	2021-06-30	A	-0.444227
000010	美丽生态	2021-06-30	B
000010	美丽生态	2021-09-30	A	3.44322
000010	美丽生态	2021-12-31	A	-0.742012
000010	美丽生态	2021-12-31	B
000010	美丽生态	2022-03-31	A	-0.063405
000010	美丽生态	2022-06-30	A	0.50608
000010	美丽生态	2022-06-30	B
000010	美丽生态	2022-09-30	A	-1.95156
000010	美丽生态	2022-12-31	A
000010	美丽生态	2022-12-31	B
000010	美丽生态	2023-03-31	A
000010	美丽生态	2023-06-30	A
000010	美丽生态	2023-06-30	B
000010	美丽生态	2023-09-30	A
000010	美丽生态	2023-12-31	A
000010	美丽生态	2023-12-31	B
000010	美丽生态	2024-03-31	A
000010	美丽生态	2024-06-30	A
000010	美丽生态	2024-06-30	B
000010	美丽生态	2024-09-30	A
000011	深物业A	1993-12-31	A
000011	深物业A	1994-12-31	A
000011	深物业A	1995-06-30	A
000011	深物业A	1995-12-31	A
000011	深物业A	1996-06-30	A
000011	深物业A	1996-12-31	A
000011	深物业A	1997-06-30	A
000011	深物业A	1997-12-31	A
000011	深物业A	1998-06-30	A
000011	深物业A	1998-12-31	A
000011	深物业A	1999-06-30	A
000011	深物业A	1999-12-31	A
000011	ST 深物业	2000-06-30	A
000011	ST 深物业	2000-12-31	A
000011	ST 深物业	2001-06-30	A
000011	ST 深物业	2001-12-31	A
000011	ST 深物业	2002-03-31	A
000011	ST 深物业	2002-06-30	A	-1.87656
000011	ST 深物业	2002-09-30	A
000011	ST 深物业	2002-12-31	A
000011	ST 深物业	2003-03-31	A	-0.983262
000011	ST 深物业	2003-06-30	A	20.4549
000011	ST 深物业	2003-09-30	A	-0.249622
000011	ST 深物业	2003-09-30	B
000011	ST 深物业	2003-12-31	A	19.783
000011	ST 深物业	2003-12-31	B
000011	ST 深物业	2004-03-31	A	-0.993594
000011	ST 深物业	2004-03-31	B	-0.999092
000011	ST 深物业	2004-06-30	A	13.0985
000011	ST 深物业	2004-06-30	B	79.4071
000011	ST 深物业	2004-09-30	A	1.49401
000011	ST 深物业	2004-09-30	B	1.19503
000011	ST 深物业	2004-12-31	A	1.51698
000011	ST 深物业	2004-12-31	B	3.00396
000011	深物业A	2005-03-31	A	-1.00247
000011	深物业A	2005-03-31	B	-0.998541
000011	深物业A	2005-06-30	A
000011	深物业A	2005-06-30	B	219.366
000011	深物业A	2005-09-30	A	-0.463902
000011	深物业A	2005-09-30	B	-0.355732
000011	深物业A	2005-12-31	A	3.75407
000011	深物业A	2005-12-31	B	3.10395
000011	深物业A	2006-03-31	A	-1.11053
000011	深物业A	2006-03-31	B	-1.1399
000011	深物业A	2006-06-30	A
000011	深物业A	2006-06-30	B
000011	深物业A	2006-09-30	A
000011	深物业A	2006-09-30	B
000011	S 深物业A	2006-12-31	A
000011	S 深物业A	2006-12-31	B
000011	S 深物业A	2007-03-31	A	-1.60835
000011	S 深物业A	2007-03-31	B
000011	S 深物业A	2007-06-30	A
000011	S 深物业A	2007-06-30	B
000011	S 深物业A	2007-09-30	A
000011	S 深物业A	2007-09-30	B
000011	S 深物业A	2007-12-31	A
000011	S 深物业A	2007-12-31	B
000011	S 深物业A	2008-03-31	A
000011	S 深物业A	2008-03-31	B
000011	S*ST 物业	2008-06-30	A
000011	S*ST 物业	2008-06-30	B
000011	S*ST 物业	2008-09-30	A
000011	S*ST 物业	2008-09-30	B
000011	S*ST 物业	2008-12-31	A
000011	S*ST 物业	2008-12-31	B
000011	S*ST 物业	2009-03-31	A	-0.691869
000011	S*ST 物业	2009-03-31	B	-1.20132
000011	S*ST 物业	2009-06-30	A	3.96448
000011	S*ST 物业	2009-06-30	B
000011	S 深物业A	2009-09-30	A	-0.443115
000011	S 深物业A	2009-09-30	B
000011	深物业A	2009-12-31	A	-2.0607
000011	深物业A	2009-12-31	B	-1.05309
000011	深物业A	2010-03-31	A
000011	深物业A	2010-03-31	B
000011	深物业A	2010-06-30	A	251.481
000011	深物业A	2010-06-30	B
000011	深物业A	2010-09-30	A	-0.91668
000011	深物业A	2010-09-30	B	-1.07978
000011	深物业A	2010-12-31	A	1.97332
000011	深物业A	2010-12-31	B
000011	深物业A	2011-03-31	A	9.40927
000011	深物业A	2011-03-31	B
000011	深物业A	2011-06-30	A	-0.947914
000011	深物业A	2011-06-30	B
000011	深物业A	2011-09-30	A	-0.575912
000011	深物业A	2011-09-30	B
000011	深物业A	2011-12-31	A	-8.62093
000011	深物业A	2011-12-31	B	-8.57306
000011	深物业A	2012-03-31	A
000011	深物业A	2012-03-31	B
000011	深物业A	2012-06-30	A	19.2333
000011	深物业A	2012-06-30	B	0.24736
000011	深物业A	2012-09-30	A	-0.172949
000011	深物业A	2012-09-30	B	-0.48128
000011	深物业A	2012-12-31	A	1.59774
000011	深物业A	2012-12-31	B	70.4953
000011	深物业A	2013-03-31	A	0.206187
000011	深物业A	2013-03-31	B	-0.9796
000011	深物业A	2013-06-30	A	-0.530996
000011	深物业A	2013-06-30	B	3.36312
000011	深物业A	2013-09-30	A	-0.972456
000011	深物业A	2013-09-30	B	-1.04474
000011	深物业A	2013-12-31	A	-10.7959
000011	深物业A	2013-12-31	B
000011	深物业A	2014-03-31	A
000011	深物业A	2014-03-31	B	-0.993657
000011	深物业A	2014-06-30	A	1.86729
000011	深物业A	2014-06-30	B	0.046372
000011	深物业A	2014-09-30	A	1.52348
000011	深物业A	2014-09-30	B	209.325
000011	深物业A	2014-12-31	A	-0.401635
000011	深物业A	2014-12-31	B	-0.967137
000011	深物业A	2015-03-31	A	-0.987723
000011	深物业A	2015-03-31	B	-1.03392
000011	深物业A	2015-06-30	A	19.7524
000011	深物业A	2015-06-30	B
000011	深物业A	2015-09-30	A	-0.495735
000011	深物业A	2015-09-30	B	-0.96074
000011	深物业A	2015-12-31	A	-1.77855
000011	深物业A	2015-12-31	B	124.384
000011	深物业A	2016-03-31	A
000011	深物业A	2016-03-31	B	-0.972008
000011	深物业A	2016-06-30	A
000011	深物业A	2016-06-30	B	4.96591
000011	深物业A	2016-09-30	A
000011	深物业A	2016-09-30	B	-1.25837
000011	深物业A	2016-12-31	A
000011	深物业A	2016-12-31	B
000011	深物业A	2017-03-31	A	-0.20003
000011	深物业A	2017-03-31	B	-0.6474
000011	深物业A	2017-06-30	A	-0.820373
000011	深物业A	2017-06-30	B	0.150343
000011	深物业A	2017-09-30	A	2.87243
000011	深物业A	2017-09-30	B	-0.992269
000011	深物业A	2017-12-31	A	-0.71207
000011	深物业A	2017-12-31	B	22.8267
000011	深物业A	2018-03-31	A	-0.11817
000011	深物业A	2018-03-31	B	-0.74426
000011	深物业A	2018-06-30	A	-0.471076
000011	深物业A	2018-06-30	B	-0.480428
000011	深物业A	2018-09-30	A	1.15008
000011	深物业A	2018-09-30	B	0.640304
000011	深物业A	2018-12-31	A	6.28116
000011	深物业A	2018-12-31	B	22.0736
000011	深物业A	2019-03-31	A	-0.822936
000011	深物业A	2019-03-31	B	-0.777742
000011	深物业A	2019-06-30	A	-0.773587
000011	深物业A	2019-06-30	B	-0.127714
000011	深物业A	2019-09-30	A	-1.8964
000011	深物业A	2019-09-30	B	-0.535971
000011	深物业A	2019-12-31	A
000011	深物业A	2019-12-31	B	-0.807834
000011	深物业A	2020-03-31	A	-0.771758
000011	深物业A	2020-03-31	B	4.66131
000011	深物业A	2020-06-30	A	-0.677944
000011	深物业A	2020-06-30	B	-0.473632
000011	深物业A	2020-09-30	A	-1.50895
000011	深物业A	2020-09-30	B	-0.031505
000011	深物业A	2020-12-31	A
000011	深物业A	2020-12-31	B	-1.69894
000011	深物业A	2021-03-31	A	-0.666887
000011	深物业A	2021-03-31	B
000011	深物业A	2021-06-30	A	1.22771
000011	深物业A	2021-06-30	B	-0.236006
000011	深物业A	2021-09-30	A	-0.803068
000011	深物业A	2021-12-31	A	1.92628
000011	深物业A	2021-12-31	B
000011	深物业A	2022-03-31	A	-0.171529
000011	深物业A	2022-06-30	A	-0.818561
000011	深物业A	2022-06-30	B
000011	深物业A	2022-09-30	A	4.32007
000011	深物业A	2022-12-31	A	-0.480257
000011	深物业A	2022-12-31	B
000011	深物业A	2023-03-31	A	-0.903603
000011	深物业A	2023-06-30	A	19.5814
000011	深物业A	2023-06-30	B
000011	深物业A	2023-09-30	A	-0.923478
000011	深物业A	2023-12-31	A	17.3691
000011	深物业A	2023-12-31	B
000011	深物业A	2024-03-31	A	-1.01097
000011	深物业A	2024-06-30	A
000011	深物业A	2024-06-30	B
000011	深物业A	2024-09-30	A	-1.60134
000012	深南玻A	1993-12-31	A
000012	深南玻A	1994-12-31	A
000012	深南玻A	1995-06-30	A
000012	深南玻A	1995-12-31	A
000012	深南玻A	1996-06-30	A
000012	深南玻A	1996-12-31	A
000012	深南玻A	1997-06-30	A
000012	深南玻A	1997-12-31	A
000012	深南玻A	1998-06-30	A
000012	深南玻A	1998-12-31	A
000012	深南玻A	1999-06-30	A
000012	深南玻A	1999-12-31	A
000012	深南玻A	2000-06-30	A
000012	深南玻A	2000-12-31	A
000012	南玻科控	2001-06-30	A
000012	南玻科控	2001-12-31	A
000012	南玻科控	2002-03-31	A
000012	南玻科控	2002-03-31	B
000012	南玻科控	2002-06-30	A	0.88999
000012	南玻科控	2002-09-30	A	-0.137324
000012	南玻科控	2002-12-31	A	-0.398717
000012	南玻科控	2003-03-31	A	0.339145
000012	南玻科控	2003-06-30	A	0.364348
000012	南玻科控	2003-09-30	A	0.289457
000012	南玻科控	2003-09-30	B
000012	南玻A	2003-12-31	A	-0.203848
000012	南玻A	2003-12-31	B
000012	南玻A	2004-03-31	A	0.618815
000012	南玻A	2004-03-31	B	0.837459
000012	南玻A	2004-06-30	A	0.206648
000012	南玻A	2004-06-30	B	0.227607
000012	南玻A	2004-09-30	A	-0.079113
000012	南玻A	2004-09-30	B	-0.12172
000012	南玻A	2004-12-31	A	-0.314085
000012	南玻A	2004-12-31	B	-0.334361
000012	南玻A	2005-03-31	A	-0.051569
000012	南玻A	2005-03-31	B	-0.108045
000012	南玻A	2005-06-30	A	0.721863
000012	南玻A	2005-06-30	B	0.788711
000012	南玻A	2005-09-30	A	0.009204
000012	南玻A	2005-09-30	B	0.007054
000012	南玻A	2005-12-31	A	-0.188887
000012	南玻A	2005-12-31	B	-0.298906
000012	南玻A	2006-03-31	A	-0.351564
000012	南玻A	2006-03-31	B	-0.277758
000012	G 南玻	2006-06-30	A	1.12762
000012	G 南玻	2006-06-30	B	1.10179
000012	G 南玻	2006-09-30	A	-0.000109
000012	G 南玻	2006-09-30	B	0.012391
000012	南玻A	2006-12-31	A	-0.248591
000012	南玻A	2006-12-31	B	-0.278415
000012	南玻A	2007-03-31	A	-0.216534
000012	南玻A	2007-03-31	B	-1.26188
000012	南玻A	2007-06-30	A	0.869163
000012	南玻A	2007-06-30	B
000012	南玻A	2007-09-30	A	0.413476
000012	南玻A	2007-09-30	B	-9.25274
000012	南玻A	2007-12-31	A	-0.063547
000012	南玻A	2007-12-31	B
000012	南玻A	2008-03-31	A	0.237444
000012	南玻A	2008-03-31	B	-0.096566
000012	南玻A	2008-06-30	A	-0.001734
000012	南玻A	2008-06-30	B	-0.930604
000012	南玻A	2008-09-30	A	-0.391395
000012	南玻A	2008-09-30	B	-2.38139
000012	南玻A	2008-12-31	A	-2.18101
000012	南玻A	2008-12-31	B
000012	南玻A	2009-03-31	A
000012	南玻A	2009-03-31	B
000012	南玻A	2009-06-30	A	2.22872
000012	南玻A	2009-06-30	B
000012	南玻A	2009-09-30	A	0.609998
000012	南玻A	2009-09-30	B	-0.978398
000012	南玻A	2009-12-31	A	0.114046
000012	南玻A	2009-12-31	B	-1.89757
000012	南玻A	2010-03-31	A	-0.072078
000012	南玻A	2010-03-31	B
000012	南玻A	2010-06-30	A	0.117062
000012	南玻A	2010-06-30	B
000012	南玻A	2010-09-30	A	0.216914
000012	南玻A	2010-09-30	B	-1.01113
000012	南玻A	2010-12-31	A	0.002402
000012	南玻A	2010-12-31	B
000012	南玻A	2011-03-31	A	-0.000325
000012	南玻A	2011-03-31	B	0.334949
000012	南玻A	2011-06-30	A	0.067741
000012	南玻A	2011-06-30	B	21.318
000012	南玻A	2011-09-30	A	-0.346824
000012	南玻A	2011-09-30	B	-1.01938
000012	南玻A	2011-12-31	A	-0.79243
000012	南玻A	2011-12-31	B
000012	南玻A	2012-03-31	A	0.50659
000012	南玻A	2012-03-31	B
000012	南玻A	2012-06-30	A	0.407722
000012	南玻A	2012-06-30	B	6.47637
000012	南玻A	2012-09-30	A	0.315293
000012	南玻A	2012-09-30	B	-1.01204
000012	南玻A	2012-12-31	A	-1.63771
000012	南玻A	2012-12-31	B
000012	南玻A	2013-03-31	A
000012	南玻A	2013-03-31	B
000012	南玻A	2013-06-30	A	1.21723
000012	南玻A	2013-06-30	B
000012	南玻A	2013-09-30	A	0.055654
000012	南玻A	2013-09-30	B	-0.909573
000012	南玻A	2013-12-31	A	1.76654
000012	南玻A	2013-12-31	B	5.26984
000012	南玻A	2014-03-31	A	-0.851565
000012	南玻A	2014-03-31	B	-1.07142
000012	南玻A	2014-06-30	A	2.29031
000012	南玻A	2014-06-30	B
000012	南玻A	2014-09-30	A	-0.645188
000012	南玻A	2014-09-30	B	-1.07369
000012	南玻A	2014-12-31	A	-0.88995
000012	南玻A	2014-12-31	B
000012	南玻A	2015-03-31	A	2.86864
000012	南玻A	2015-03-31	B
000012	南玻A	2015-06-30	A	0.093695
000012	南玻A	2015-06-30	B
000012	南玻A	2015-09-30	A	1.39793
000012	南玻A	2015-09-30	B	-0.936094
000012	南玻A	2015-12-31	A	-0.023452
000012	南玻A	2015-12-31	B	-3.54052
000012	南玻A	2016-03-31	A	0.177044
000012	南玻A	2016-03-31	B
000012	南玻A	2016-06-30	A	0.271228
000012	南玻A	2016-06-30	B	-0.524718
000012	南玻A	2016-09-30	A	-0.03896
000012	南玻A	2016-09-30	B	-1.21954
000012	南玻A	2016-12-31	A	-0.602532
000012	南玻A	2016-12-31	B
000012	南玻A	2017-03-31	A	0.734438
000012	南玻A	2017-03-31	B
000012	南玻A	2017-06-30	A	0.54162
000012	南玻A	2017-06-30	B
000012	南玻A	2017-09-30	A	0.183901
000012	南玻A	2017-09-30	B
000012	南玻A	2017-12-31	A	-0.457938
000012	南玻A	2017-12-31	B
000012	南玻A	2018-03-31	A	0.028107
000012	南玻A	2018-03-31	B	-1.07142
000012	南玻A	2018-06-30	A	0.248394
000012	南玻A	2018-06-30	B
000012	南玻A	2018-09-30	A	-0.35718
000012	南玻A	2018-09-30	B	-1.30287
000012	南玻A	2018-12-31	A	-1.24028
000012	南玻A	2018-12-31	B
000012	南玻A	2019-03-31	A
000012	南玻A	2019-03-31	B
000012	南玻A	2019-06-30	A	0.827139
000012	南玻A	2019-06-30	B
000012	南玻A	2019-09-30	A	-0.305012
000012	南玻A	2019-09-30	B	-1.14929
000012	南玻A	2019-12-31	A	-1.05418
000012	南玻A	2019-12-31	B
000012	南玻A	2020-03-31	A
000012	南玻A	2020-03-31	B
000012	南玻A	2020-06-30	A	1.29596
000012	南玻A	2020-06-30	B
000012	南玻A	2020-09-30	A	0.301563
000012	南玻A	2020-09-30	B	-1.09342
000012	南玻A	2020-12-31	A	-0.656681
000012	南玻A	2020-12-31	B
000012	南玻A	2021-03-31	A	3.54914
000012	南玻A	2021-03-31	B	-1.17785
000012	南玻A	2021-06-30	A	0.300648
000012	南玻A	2021-06-30	B
000012	南玻A	2021-09-30	A	-0.728244
000012	南玻A	2021-12-31	A	-0.813283
000012	南玻A	2021-12-31	B
000012	南玻A	2022-03-31	A	8.71671
000012	南玻A	2022-06-30	A	0.561484
000012	南玻A	2022-06-30	B
000012	南玻A	2022-09-30	A	0.076163
000012	南玻A	2022-12-31	A	-0.565668
000012	南玻A	2022-12-31	B
000012	南玻A	2023-03-31	A	0.358995
000012	南玻A	2023-06-30	A	0.097409
000012	南玻A	2023-06-30	B
000012	南玻A	2023-09-30	A	0.229612
000012	南玻A	2023-12-31	A	-0.891473
000012	南玻A	2023-12-31	B
000012	南玻A	2024-03-31	A	4.53361
000012	南玻A	2024-06-30	A	0.180319
000012	南玻A	2024-06-30	B
000012	南玻A	2024-09-30	A	-0.976774
000014	深华源A	1993-12-31	A
000014	深华源A	1994-12-31	A
000014	深华源A	1995-06-30	A
000014	深华源A	1995-12-31	A
000014	深华源A	1996-06-30	A
000014	深华源A	1996-12-31	A
000014	深华源A	1997-06-30	A
000014	深华源A	1997-12-31	A
000014	ST 深华源	1998-06-30	A
000014	ST 深华源	1998-12-31	A
000014	ST 深华源	1999-06-30	A
000014	ST 深华源	1999-12-31	A
000014	ST 深华源	2000-06-30	A
000014	ST 深华源	2000-12-31	A
000014	ST 深华源	2001-06-30	A
000014	ST 深华源	2001-12-31	A
000014	深华源A	2002-03-31	A
000014	深华源A	2002-06-30	A	-1.89399
000014	沙河股份	2002-09-30	A
000014	沙河股份	2002-12-31	A
000014	沙河股份	2003-03-31	A	-0.962407
000014	沙河股份	2003-06-30	A	4.35503
000014	沙河股份	2003-09-30	A	0.496718
000014	沙河股份	2003-12-31	A	0.938515
000014	沙河股份	2003-12-31	B
000014	沙河股份	2004-03-31	A	-0.863211
000014	沙河股份	2004-06-30	A	1.42294
000014	沙河股份	2004-09-30	A	0.056252
000014	沙河股份	2004-12-31	A	2.159
000014	沙河股份	2004-12-31	B	1.68422
000014	沙河股份	2005-03-31	A	-0.505348
000014	沙河股份	2005-03-31	B	-0.453134
000014	沙河股份	2005-06-30	A	0.914892
000014	沙河股份	2005-06-30	B	1.02098
000014	沙河股份	2005-09-30	A	-0.762492
000014	沙河股份	2005-09-30	B	-0.799998
000014	沙河股份	2005-12-31	A	0.392862
000014	沙河股份	2005-12-31	B	0.759409
000014	G 沙河	2006-03-31	A	2.91822
000014	G 沙河	2006-03-31	B	2.67462
000014	G 沙河	2006-06-30	A	0.128981
000014	G 沙河	2006-06-30	B	0.127025
000014	G 沙河	2006-09-30	A	-0.878811
000014	G 沙河	2006-09-30	B	-0.884864
000014	沙河股份	2006-12-31	A	-6.27204
000014	沙河股份	2006-12-31	B	-7.46842
000014	沙河股份	2007-03-31	A
000014	沙河股份	2007-03-31	B
000014	沙河股份	2007-06-30	A
000014	沙河股份	2007-06-30	B
000014	沙河股份	2007-09-30	A
000014	沙河股份	2007-09-30	B	-1.48357
000014	沙河股份	2007-12-31	A
000014	沙河股份	2007-12-31	B
000014	沙河股份	2008-03-31	A	-1.86869
000014	沙河股份	2008-03-31	B	-2.12839
000014	沙河股份	2008-06-30	A
000014	沙河股份	2008-06-30	B
000014	沙河股份	2008-09-30	A
000014	沙河股份	2008-09-30	B
000014	沙河股份	2008-12-31	A
000014	沙河股份	2008-12-31	B
000014	沙河股份	2009-03-31	A	-1.03059
000014	沙河股份	2009-03-31	B	-1.00944
000014	沙河股份	2009-06-30	A
000014	沙河股份	2009-06-30	B
000014	沙河股份	2009-09-30	A	0.08184
000014	沙河股份	2009-09-30	B	0.096755
000014	沙河股份	2009-12-31	A	-0.691888
000014	沙河股份	2009-12-31	B	-0.897356
000014	沙河股份	2010-03-31	A	5.03875
000014	沙河股份	2010-03-31	B	16.5642
000014	沙河股份	2010-06-30	A	-1.00159
000014	沙河股份	2010-06-30	B	-1.03396
000014	沙河股份	2010-09-30	A
000014	沙河股份	2010-09-30	B
000014	沙河股份	2010-12-31	A
000014	沙河股份	2010-12-31	B
000014	沙河股份	2011-03-31	A	-1.1039
000014	沙河股份	2011-03-31	B
000014	沙河股份	2011-06-30	A
000014	沙河股份	2011-06-30	B
000014	沙河股份	2011-09-30	A	-0.467234
000014	沙河股份	2011-09-30	B
000014	沙河股份	2011-12-31	A	3.59938
000014	沙河股份	2011-12-31	B	43.3526
000014	沙河股份	2012-03-31	A	-0.997233
000014	沙河股份	2012-03-31	B	-0.983469
000014	沙河股份	2012-06-30	A	-54.7012
000014	沙河股份	2012-06-30	B	-6.41917
000014	沙河股份	2012-09-30	A
000014	沙河股份	2012-09-30	B
000014	沙河股份	2012-12-31	A
000014	沙河股份	2012-12-31	B	21.2499
000014	沙河股份	2013-03-31	A	-0.911177
000014	沙河股份	2013-03-31	B	-1.55749
000014	沙河股份	2013-06-30	A	-0.34226
000014	沙河股份	2013-06-30	B
000014	沙河股份	2013-09-30	A	-0.292213
000014	沙河股份	2013-09-30	B
000014	沙河股份	2013-12-31	A	14.8412
000014	沙河股份	2013-12-31	B
000014	沙河股份	2014-03-31	A	-0.20252
000014	沙河股份	2014-03-31	B	-0.190215
000014	沙河股份	2014-06-30	A	-0.616645
000014	沙河股份	2014-06-30	B	-1.39443
000014	沙河股份	2014-09-30	A	-2.38707
000014	沙河股份	2014-09-30	B
000014	沙河股份	2014-12-31	A
000014	沙河股份	2014-12-31	B
000014	沙河股份	2015-03-31	A	-1.13162
000014	沙河股份	2015-03-31	B	-1.18016
000014	沙河股份	2015-06-30	A
000014	沙河股份	2015-06-30	B
000014	沙河股份	2015-09-30	A	-5.46058
000014	沙河股份	2015-09-30	B
000014	沙河股份	2015-12-31	A
000014	沙河股份	2015-12-31	B
000014	沙河股份	2016-03-31	A	-1.16821
000014	沙河股份	2016-03-31	B	-1.20595
000014	沙河股份	2016-06-30	A
000014	沙河股份	2016-06-30	B
000014	沙河股份	2016-09-30	A
000014	沙河股份	2016-09-30	B
000014	沙河股份	2016-12-31	A
000014	沙河股份	2016-12-31	B
000014	沙河股份	2017-03-31	A	-1.14181
000014	沙河股份	2017-03-31	B	-1.60626
000014	沙河股份	2017-06-30	A
000014	沙河股份	2017-06-30	B
000014	沙河股份	2017-09-30	A	-1.43028
000014	沙河股份	2017-09-30	B
000014	沙河股份	2017-12-31	A
000014	沙河股份	2017-12-31	B
000014	沙河股份	2018-03-31	A	-1.37903
000014	沙河股份	2018-03-31	B	-1.91228
000014	沙河股份	2018-06-30	A
000014	沙河股份	2018-06-30	B
000014	沙河股份	2018-09-30	A
000014	沙河股份	2018-09-30	B
000014	沙河股份	2018-12-31	A
000014	沙河股份	2018-12-31	B
000014	沙河股份	2019-03-31	A	-1.45425
000014	沙河股份	2019-03-31	B
000014	沙河股份	2019-06-30	A
000014	沙河股份	2019-06-30	B
000014	沙河股份	2019-09-30	A	-7.0828
000014	沙河股份	2019-09-30	B
000014	沙河股份	2019-12-31	A
000014	沙河股份	2019-12-31	B	-1.96958
000014	沙河股份	2020-03-31	A	-0.815587
000014	沙河股份	2020-03-31	B
000014	沙河股份	2020-06-30	A	1.13722
000014	沙河股份	2020-06-30	B
000014	沙河股份	2020-09-30	A	-1.77032
000014	沙河股份	2020-09-30	B
000014	沙河股份	2020-12-31	A
000014	沙河股份	2020-12-31	B	-0.789572
000014	沙河股份	2021-03-31	A
000014	沙河股份	2021-03-31	B	-3.81728
000014	沙河股份	2021-06-30	A
000014	沙河股份	2021-06-30	B
000014	沙河股份	2021-09-30	A
000014	沙河股份	2021-12-31	A
000014	沙河股份	2021-12-31	B
000014	沙河股份	2022-03-31	A	-0.831257
000014	沙河股份	2022-06-30	A	0.914474
000014	沙河股份	2022-06-30	B
000014	沙河股份	2022-09-30	A	-1.58102
000014	沙河股份	2022-12-31	A
000014	沙河股份	2022-12-31	B
000014	沙河股份	2023-03-31	A	1.47764
000014	沙河股份	2023-06-30	A	0.715871
000014	沙河股份	2023-06-30	B
000014	沙河股份	2023-09-30	A	-0.797333
000014	沙河股份	2023-12-31	A	-0.570783
000014	沙河股份	2023-12-31	B
000014	沙河股份	2024-03-31	A	0.962099
000014	沙河股份	2024-06-30	A	-0.843938
000014	沙河股份	2024-06-30	B
000014	沙河股份	2024-09-30	A	-1.9406
000016	深康佳A	1992-12-31	A
000016	深康佳A	1993-12-31	A
000016	深康佳A	1994-12-31	A
000016	深康佳A	1995-06-30	A
000016	深康佳A	1995-12-31	A
000016	深康佳A	1996-06-30	A
000016	深康佳A	1996-12-31	A
000016	深康佳A	1997-06-30	A
000016	深康佳A	1997-12-31	A
000016	深康佳A	1998-06-30	A
000016	深康佳A	1998-12-31	A
000016	深康佳A	1999-06-30	A
000016	深康佳A	1999-12-31	A
000016	深康佳A	2000-06-30	A
000016	深康佳A	2000-12-31	A
000016	深康佳A	2001-06-30	A
000016	深康佳A	2001-12-31	A
000016	深康佳A	2002-03-31	A
000016	深康佳A	2002-06-30	A	-1.17376
000016	深康佳A	2002-09-30	A
000016	深康佳A	2002-12-31	A
000016	深康佳A	2003-03-31	A
000016	深康佳A	2003-06-30	A	-0.69195
000016	深康佳A	2003-09-30	A	1.76745
000016	深康佳A	2003-09-30	B
000016	深康佳A	2003-12-31	A	0.473217
000016	深康佳A	2003-12-31	B
000016	深康佳A	2004-03-31	A	-0.310492
000016	深康佳A	2004-03-31	B	-0.902515
000016	深康佳A	2004-06-30	A	-0.281821
000016	深康佳A	2004-06-30	B	5.8673
000016	深康佳A	2004-09-30	A	-0.047996
000016	深康佳A	2004-09-30	B	-1.08017
000016	深康佳A	2004-12-31	A	3.38406
000016	深康佳A	2004-12-31	B
000016	深康佳A	2005-03-31	A	-0.790687
000016	深康佳A	2005-03-31	B	-0.766674
000016	深康佳A	2005-06-30	A	-1.1096
000016	深康佳A	2005-06-30	B	-0.841084
000016	深康佳A	2005-09-30	A
000016	深康佳A	2005-09-30	B	13.8967
000016	深康佳A	2005-12-31	A	-0.208726
000016	深康佳A	2005-12-31	B	-0.909712
000016	G 康佳A	2006-03-31	A	1.89437
000016	G 康佳A	2006-03-31	B	3.38029
000016	G 康佳A	2006-06-30	A	-0.548229
000016	G 康佳A	2006-06-30	B	-0.266608
000016	G 康佳A	2006-09-30	A	0.444523
000016	G 康佳A	2006-09-30	B	-0.167665
000016	深康佳A	2006-12-31	A	2.19457
000016	深康佳A	2006-12-31	B	2.04255
000016	深康佳A	2007-03-31	A	-0.518346
000016	深康佳A	2007-03-31	B	0.26558
000016	深康佳A	2007-06-30	A	-0.408885
000016	深康佳A	2007-06-30	B	-0.497197
000016	深康佳A	2007-09-30	A	-0.040741
000016	深康佳A	2007-09-30	B	-0.707128
000016	深康佳A	2007-12-31	A	10.4305
000016	深康佳A	2007-12-31	B	27.622
000016	深康佳A	2008-03-31	A	-0.644063
000016	深康佳A	2008-03-31	B	-0.56397
000016	深康佳A	2008-06-30	A	-0.456144
000016	深康佳A	2008-06-30	B	-0.532961
000016	深康佳A	2008-09-30	A	2.77822
000016	深康佳A	2008-09-30	B	2.99793
000016	深康佳A	2008-12-31	A	-0.68056
000016	深康佳A	2008-12-31	B	-1.23339
000016	深康佳A	2009-03-31	A	-0.130004
000016	深康佳A	2009-03-31	B
000016	深康佳A	2009-06-30	A	0.208859
000016	深康佳A	2009-06-30	B	0.047591
000016	深康佳A	2009-09-30	A	-0.152859
000016	深康佳A	2009-09-30	B	-2.10824
000016	深康佳A	2009-12-31	A	-0.924028
000016	深康佳A	2009-12-31	B
000016	深康佳A	2010-03-31	A	11.5664
000016	深康佳A	2010-03-31	B
000016	深康佳A	2010-06-30	A	-1.11861
000016	深康佳A	2010-06-30	B
000016	深康佳A	2010-09-30	A
000016	深康佳A	2010-09-30	B
000016	深康佳A	2010-12-31	A	-3.86347
000016	深康佳A	2010-12-31	B
000016	深康佳A	2011-03-31	A
000016	深康佳A	2011-03-31	B
000016	深康佳A	2011-06-30	A
000016	深康佳A	2011-06-30	B
000016	深康佳A	2011-09-30	A
000016	深康佳A	2011-09-30	B
000016	深康佳A	2011-12-31	A	0.032059
000016	深康佳A	2011-12-31	B
000016	深康佳A	2012-03-31	A	-3.31057
000016	深康佳A	2012-03-31	B	-2.05103
000016	深康佳A	2012-06-30	A
000016	深康佳A	2012-06-30	B
000016	深康佳A	2012-09-30	A	-13.6042
000016	深康佳A	2012-09-30	B
000016	深康佳A	2012-12-31	A
000016	深康佳A	2012-12-31	B
000016	深康佳A	2013-03-31	A
000016	深康佳A	2013-03-31	B	-0.7351
000016	深康佳A	2013-06-30	A
000016	深康佳A	2013-06-30	B	0.296589
000016	深康佳A	2013-09-30	A	-2.05501
000016	深康佳A	2013-09-30	B	-1.91404
000016	深康佳A	2013-12-31	A
000016	深康佳A	2013-12-31	B
000016	深康佳A	2014-03-31	A
000016	深康佳A	2014-03-31	B	-0.561582
000016	深康佳A	2014-06-30	A
000016	深康佳A	2014-06-30	B	-0.319615
000016	深康佳A	2014-09-30	A	-2.50669
000016	深康佳A	2014-09-30	B	-17.6416
000016	深康佳A	2014-12-31	A
000016	深康佳A	2014-12-31	B
000016	深康佳A	2015-03-31	A
000016	深康佳A	2015-03-31	B
000016	深康佳A	2015-06-30	A
000016	深康佳A	2015-06-30	B	-5.94676
000016	深康佳A	2015-09-30	A
000016	深康佳A	2015-09-30	B
000016	深康佳A	2015-12-31	A
000016	深康佳A	2015-12-31	B
000016	深康佳A	2016-03-31	A
000016	深康佳A	2016-03-31	B
000016	深康佳A	2016-06-30	A
000016	深康佳A	2016-06-30	B
000016	深康佳A	2016-09-30	A
000016	深康佳A	2016-09-30	B
000016	深康佳A	2016-12-31	A
000016	深康佳A	2016-12-31	B
000016	深康佳A	2017-03-31	A	-3.57046
000016	深康佳A	2017-03-31	B
000016	深康佳A	2017-06-30	A
000016	深康佳A	2017-06-30	B
000016	深康佳A	2017-09-30	A
000016	深康佳A	2017-09-30	B
000016	深康佳A	2017-12-31	A	72.5626
000016	深康佳A	2017-12-31	B
000016	深康佳A	2018-03-31	A	-0.9937
000016	深康佳A	2018-03-31	B	-0.981247
000016	深康佳A	2018-06-30	A	6.90979
000016	深康佳A	2018-06-30	B	3.67297
000016	深康佳A	2018-09-30	A	-0.86192
000016	深康佳A	2018-09-30	B	-1.3737
000016	深康佳A	2018-12-31	A	-7.19824
000016	深康佳A	2018-12-31	B
000016	深康佳A	2019-03-31	A
000016	深康佳A	2019-03-31	B
000016	深康佳A	2019-06-30	A	0.917772
000016	深康佳A	2019-06-30	B
000016	深康佳A	2019-09-30	A	-0.620809
000016	深康佳A	2019-09-30	B
[truncated: 481,025+ more rows]

## Sheet: Sheet2
股票代码	营业利润增长率	股票代码	营业利润增长率
000008	-0.037651	4
000008	-0.187263	4
000008	1.83312	4
000008	0.472322	4
000008	8.58663	4
000008	2.03882	4
000008	2.27608	4
000008	-8.91356	4
000008	-19.1881	4
000008	-0.398717	8
000008	-0.203848	8
000008	-0.314085	8
000008	-0.188887	8
000012	-0.248591	8
000012	-0.063547	8
000012	-2.18101	8
000012	0.114046	8
000012	0.002402	8
000012	-0.79243	10
000012	-1.63771	10
000012	1.76654	16
000012	-0.88995	16
000012	-0.023452	16
000012	-0.602532	16
000012	-0.457938	16
000012	-1.24028	16
000012	-1.05418	16
000012	-0.656681	16
000012	-0.813283	16
000012	0.473217	16
000012	3.38406	16
000012	-0.208726	16
000012	2.19457	16
000012	10.4305	17
000012	-0.68056	17
000016	-0.924028	17
000016	-3.86347	17
000016	0.032059	17
000016	72.5626	17
000016	-7.19824	17
000016	-3.42461	17
000016	-1.31638	17
000016	-7.16693	20
000016	-0.715184	20
000016	8.40293	20
000016	-5.99068	20
000016	-8.40664	20
000016	-7.18302	20
000016	-0.391876	20
000016	-118.715	20
000016	-1.40037	20
000016	19.7703	20
000016	6.66934	20
000016	-5.37851	20
000016	19.021	20
000016	1.08881	21
000016	-0.732835	21
000017	0.559564	21
000017	1.90507	21
000017	0.600105	21
000017	0.127866	21
000017	0.004493	21
000017	1.81584	21
000017	-0.268445	21
000020	0.445232	21
000020	0.299048	21
000020	-0.374374	21
000020	-0.066478	21
000020	-0.505869	30
000020	1.09149	30
000020	-1.64658	30
000020	-0.306987	30
000020	-0.660027	30
000020	-0.349535	30
000020	0.487355	30
000020	-0.076165	30
000020	3.66937	30
000020	5.37954	30
000020	0.219948	30
000020	-0.483841	32
000020	13.0014	32
000021	-3.81577	32
000021	1.9629	32
000021	-0.810316	45
000021	-0.494737	45
000021	-1.25354	45
000021	-1.13536	45
000021	1.67508	45
000021	-1.02007	45
000021	0.117823	45
000021	0.129857	45
000021	-0.173474	45
000021	0.755011	49
000021	0.076058	49
000021	0.076883	49
000021	-0.006582	49
000021	0.559272	49
000021	-0.406701	49
000021	0.405786	49
000021	0.102426	49
000021	-0.118813	49
000021	-0.167724	49
000021	-0.938236	49
000023	-0.419796	49
000023	0.894823	49
000023	-1.21915	50
000023	-0.63832	50
000023	-0.684003	50
000023	-0.654846	50
000023	0.871036	50
000023	0.282613	50
000023	0.187632	50
000023	0.838375	50
000023	0.436238	50
000023	0.188279	50
000023	18.6416	50
000023	2.22202	50
000023	-0.998152	50
000023	-0.391905	63
000023	1.43743	63
000023	0.443701	63
000023	0.577401	63
000023	-1.37069	63
000023	-0.225405	63
000023	-1.16775	63
000030	-1.13759	63
000030	-0.915127	63
000030	-0.84685	63
000030	20.4265	63
000030	0.116461	63
000030	-1.51685	63
000030	-0.429183	66
000030	-13.8142	66
000030	-0.183822	66
000039	-31.5096	66
000039	-1.86432	66
000039	-10.8753	66
000039	8.14581	66
000039	-0.718184	66
000039	4.12908	66
000039	19.5483	66
000039	0.10152	66
000039	0.107778	66
000039	-1.70381	66
000039	-0.432086	68
000039	0.985235	68
000039	0.855974	68
000039	1.26715	68
000039	0.825799	68
000039	-0.0674	68
000039	1.05843	70
000039	0.615607	70
000039	-0.113563	70
000039	-0.05849	70
000039	0.324536	70
000039	0.452765	70
000045	2.04053	70
000045	2.22361	70
000045	1.11444	70
000045	-0.231369	70
000045	0.008482	70
000045	-0.325765	70
000045	-362.161	70
000045	-7.43003	78
000045	-0.658953	100
000045	-1.85472	100
000045	-2.62486	100
000045	1.52911	100
000045	0.630463	100
000045	-1.79891	100
000045	-1.29991	100
000045	-0.406537	100
000045	0.10116	100
000045	-0.09126	100
000045	-2.65261	100
000045	-90.8653	100
000045	-17.1212	100
000045	-4.76626	153
000048	0.69255	153
000048	0.57443	153
000048	0.976029	153
000048	-1.46296	153
000048	0.565994	153
000048	1.58528	153
000048	-0.554846	153
000048	10.3063	153
000048	6.61538	153
000048	21.9131	153
000048	12.7557	153
000048	2.3564	153
000049	-0.23173	155
000049	5.2408	155
000049	-0.834705	155
000049	-0.330853	155
000049	4.60082	155
000049	1.23231	157
000049	-0.793274	157
000049	-1.3389	157
000049	3.60453	157
000049	2.43192	157
000049	0.719197	157
000049	-1.21517	157
000049	-0.903783	157
000049	-0.147301	157
000049	0.90788	157
000049	0.260822	157
000049	0.329946	157
000049	-0.619535	157
000049	-0.171358	301
000049	-0.392317	301
000049	-3.20056	301
000050	0.462697	301
000050	0.886584	301
000050	-0.399832	301
000050	-0.675884	333
000050	3.80318	333
000050	-0.654586	333
000050	0.103922	333
000050	-0.120353	333
000050	0.054818	333
000050	0.340031	333
000050	-0.516708	333
000050	-0.351964	333
000050	8.31404	333
000050	3.44836	333
000050	1.28279	338
000050	1.71471	338
000050	6.35416	338
000050	21.6962	338
000050	2.06971	338
000050	5.46679	338
000050	-0.869907	338
000050	-1.34508	338
000055	-0.533442	338
000055	-0.263208	338
000055	-0.935106	338
000055	-0.528458	338
000055	0.394471	338
000055	-0.548817	400
000055	-9.23551	400
000055	-0.370559	400
000055	0.119768	400
000055	-0.754521	400
000055	-1.2394	400
000055	1.28638	400
000055	1.57842	400
000055	-5.41593	400
000055	-3.28913	400
000055	-0.371525	400
000055	27.7025	400
000055	23.2071	400
000055	6.85374	403
000055	-3.05	403
000055	1.38135	403
000055	1.63645	403
000059	1.56926	403
000059	-1.01983	403
000059	-0.291112	404
000059	-0.77973	404
000059	-0.627694	404
000059	-0.305896	404
000059	-0.422461	404
000059	-0.373863	404
000059	-15.8416	404
000059	-1.18425	404
000059	-0.357087	404
000059	0.426313	404
000059	6.32301	404
000059	2.77072	404
000059	-16.3581	404
000059	-0.831781	407
000059	1.20041	407
000059	-0.63052	407
000059	0.823771	407
000059	-0.022758	408
000059	0.274584	408
000060	-1.47182	408
000060	-0.786439	408
000060	-0.338389	408
000060	-0.623472	408
000060	1.91499	410
000060	-0.49509	410
000060	-0.71484	410
000060	-0.21533	410
000060	-1.29098	410
000060	-1.62568	410
000060	-1.14297	410
000060	0.17534	410
000060	-0.672859	413
000060	-0.792877	413
000060	-3.44418	413
000060	-1.12239	413
000060	-0.244918	413
000060	-0.755817	413
000060	-1.18252	413
000060	-0.532833	413
000060	0.103231	413
000060	-0.769829	413
000063	-0.308112	413
000063	0.462325	413
000063	-0.353783	420
000063	0.611055	420
000063	0.20998	420
000063	-0.518653	420
000063	-0.151351	420
000063	-0.17609	420
000063	0.107546	420
000063	-0.65187	420
000063	0.079189	420
000063	0.62807	420
000063	0.571223	420
000063	-0.69658	420
000063	-1.15303	422
000063	-5.68637	422
000063	-0.07725	422
000063	1.02428	422
000063	-0.263522	422
000063	0.099262	422
000063	-0.365692	422
000063	0.001158	422
000066	0.667958	422
000066	-9.5193	422
000066	0.601046	423
000066	2.1665	423
000066	-0.037571	423
000066	0.082979	423
000066	-1.15678	423
000066	-0.442762	423
000066	-0.685894	423
000066	-0.040594	423
000066	0.272125	423
000066	0.007119	423
000066	-0.855596	423
000066	-0.328253	423
000066	-0.856888	423
000066	-0.035196	425
000066	0.143625	425
000066	13.4162	425
000066	-0.793366	425
000066	-0.328329	425
000066	-0.366824	425
000070	-0.445594	425
000070	-0.349945	425
000070	-0.569573	425
000070	-0.510893	425
000070	-0.408719	425
000070	0.177872	425
000070	-1.66813	425
000070	-0.141291	510
000070	0.284027	510
000070	-0.004019	510
000070	0.044716	510
000070	0.448365	510
000070	-0.13408	510
000070	0.146853	510
000070	0.830749	510
000070	-0.066216	510
000070	0.356541	510
000070	0.023581	510
000070	-0.38521	510
000070	-0.331706	513
000070	-0.391091	513
000100	0.116259	513
000100	-1.13718	513
000100	-0.04883	513
000100	-0.028872	513
000100	0.664147	513
000100	-0.190514	513
000100	1.02787	513
000100	0.950444	513
000100	1.18718	513
000100	2.8418	513
000100	1.111	513
000100	0.64692	518
000100	6.2962	518
000100	3.8481	518
000100	1.23422	518
000100	0.695591	518
000100	0.446624	518
000153	0.142729	518
000153	-0.373046	518
000153	-0.903112	518
000153	-0.964199	518
000153	-1.55854	518
000153	-1.08976	518
000153	-1.15677	518
000153	-0.732937	519
000153	-0.731823	519
000153	-0.557646	519
000153	-0.509325	519
000153	-1.06983	519
000153	-3.82304	519
000153	-0.881941	519
000153	-5.29113	519
000153	-0.494688	519
000153	-1.26151	521
000153	-0.748058	521
000153	-0.593882	521
000153	-0.226384	521
000153	0.289054	521
000153	-1.32101	521
000157	-1.63243	521
000157	-1.29021	521
000157	-0.330974	521
000157	0.885773	521
000157	-1.98484	521
000157	3.29731	521
000157	-72.8358	521
000157	1.57504	523
000157	0.938572	523
000157	-0.200541	523
000157	-1.60139	523
000157	-0.433962	523
000157	-0.856705	523
000157	-0.57593	523
000157	-0.310128	523
000157	0.029916	523
000157	-1.35626	523
000157	-0.190862	523
000157	-1.70901	525
000157	-0.204278	525
000157	0.307714	525
000157	4.33929	525
000301	5.30196	525
000301	85.228	525
000301	0.596512	525
000301	-0.809552	525
000301	-0.890713	525
000301	0.809628	525
000301	-2.05643	528
000301	-0.276822	528
000301	-0.20847	528
000301	1.93386	528
000301	-1.37228	528
000301	0.240746	528
000301	-3.77474	528
000301	-2.74689	528
000301	64.2074	528
000301	2.7737	528
000301	1.1749	528
000301	1.72055	528
000301	-0.613104	528
000301	1.17582	530
000301	-0.295269	530
000301	0.597989	530
000333	5.83626	530
000333	2.31126	530
000333	0.731376	530
000333	0.90465	530
000333	0.643972	530
000333	-7.34051	530
000333	-17.2232	530
000333	2.16506	530
000338	0.621885	530
000338	-1.3057	530
000338	1.0172	533
000338	-1.39937	533
000338	-0.471074	533
000338	-0.649729	533
000338	-0.499672	533
000338	-0.772398	533
000338	-0.872578	533
000338	1.4155	533
000338	-0.906263	533
000338	-0.37321	533
000338	-0.200427	533
000338	0.150688	533
000338	0.699692	533
000400	0.431807	534
000400	-4.73177	534
000400	0.2452	534
000400	1.03575	534
000400	-0.667107	534
000400	0.409208	536
000400	-2.52451	536
000400	-339.701	536
000400	-0.754957	536
000400	0.310039	536
000400	1.53672	536
000400	0.214218	536
000400	0.493738	536
000400	1.16662	536
000400	1.79919	536
000400	1.05789	536
000400	0.647961	536
000400	0.410513	538
000400	0.408412	538
000400	0.03922	538
000400	-0.038001	538
000400	0.420109	538
000401	0.311926	538
000401	0.519238	538
000401	1.3725	538
000401	1.38631	538
000401	-37.718	538
000401	0.844044	538
000401	0.110969	538
000401	-0.214263	538
000401	-0.471365	541
000401	-5.77098	541
000401	-1.70569	541
000401	0.38603	541
000401	-0.947406	541
000401	-0.689196	541
000401	0.565707	541
000401	-0.087145	541
000401	-0.430648	541
000401	0.768259	541
000401	-10.029	541
000401	-1.61806	541
000401	0.088651	541
000401	-0.027036	545
000403	-0.089571	545
000403	2.40829	545
000403	0.364234	545
000403	0.126608	545
000403	-0.449681	545
000403	-0.419539	545
000403	-0.459798	545
000403	-0.522897	545
000403	-0.085795	545
000404	-1.7454	545
000404	0.005664	547
000404	0.357466	547
000404	-2.79996	547
000404	-0.028647	547
000404	1.54013	547
000404	0.328089	547
000404	-0.225578	547
000404	0.177644	547
000404	-0.956579	547
000404	-0.401502	547
000404	0.05504	547
000404	-2.8315	547
000404	-13.6465	547
000404	-0.433822	550
000404	0.234404	550
000404	0.649347	550
000404	0.563276	550
000404	1.54643	550
000404	0.04312	550
000404	-0.307079	550
000404	-0.422898	550
000408	-0.688806	550
000408	-0.300291	550
000408	-0.896232	550
000408	-2.63015	550
000408	5.36192	550
000408	6.59204	553
000408	1.4869	553
000408	12.0712	553
000408	0.81721	553
000408	0.666644	553
000408	1.17862	553
000408	0.70655	553
000408	-0.790193	553
000408	3.03506	553
000410	0.13581	553
000410	1.14994	553
000410	2.50977	553
000410	-0.695363	553
000410	0.231857	559
000410	-0.032752	559
000410	0.068543	559
000410	-0.305239	559
000410	0.016004	559
000410	-0.233962	559
000410	-0.219505	559
000410	-0.180815	559
000410	-0.890655	559
000410	-0.326339	559
000410	-0.045932	559
000410	-0.404898	559
000410	-0.220282	559
000410	-1.06879	561
000413	-0.438432	561
000413	-23.0809	561
000413	6.41132	561
000413	-61.7015	561
000413	-0.575146	561
000413	-2.61589	561
000413	-0.077375	561
000413	-30.9645	561
000413	-5.80702	561
000413	-17.5015	561
000413	-1.91553	561
000413	-2.1178	561
000413	-0.538017	565
000413	-0.494315	565
000413	-2.89976	565
000413	-2.30687	565
000413	-5.94215	565
000413	-9.25171	565
000413	8.96801	565
000413	-3.2858	565
000420	-0.505185	565
000420	0.616079	565
000420	-0.887605	565
000420	2.94472	565
000420	2.63355	565
000420	-0.409186	566
000420	-1.09834	566
000420	-0.869375	566
000420	-1.25892	566
000420	-1.68279	566
000420	-105.341	566
000420	-2.22098	566
000420	-3.80682	566
000420	-1.66035	566
000420	-0.1197	566
000420	1.44728	566
000420	-0.478692	566
000420	-2.48002	566
000420	-0.126357	570
000420	-0.531229	570
000422	-10.5374	570
000422	-0.533003	570
000422	-3.34793	570
000422	-2.3793	570
000422	-1.87565	570
000422	-0.574698	570
000422	-2.12921	570
000422	-2.45691	570
000422	5.16318	570
000422	0.788677	570
000422	0.005377	570
000422	-3.54476	571
000422	-0.416487	572
000422	-0.382019	572
000422	-0.716654	572
000422	-0.39124	572
000422	-0.096813	572
000422	0.478627	572
000422	-0.848505	572
000423	4.80793	572
000423	14.2035	572
000423	-53.6433	572
000423	-21.219	572
000423	-1.44591	576
000423	-0.555361	576
000423	-0.808016	576
000423	-1.4159	576
000423	-0.212948	581
000423	-34.3646	581
000423	-0.143353	581
000423	0.090759	581
000423	-1.03791	581
000423	-2.98573	581
000423	0.208353	581
000423	-0.248439	581
000423	-14.5699	581
000423	-7.89678	581
000423	0.21885	581
000423	-0.38324	581
000423	0.286949	581
000423	0.560864	584
000425	0.055336	584
000425	-0.189719	584
000425	-4.30792	584
000425	0.356465	584
000425	-0.234094	584
000425	-0.480086	584
000425	-1.66154	584
000425	0.047916	584
000425	-0.336492	584
000425	-0.348078	584
000425	0.054162	584
000425	0.170343	586
000425	-363.242	586
000425	0.054593	586
000425	0.216716	586
000425	-0.84004	586
000425	-0.375791	586
000425	-0.141087	586
000425	2.54204	586
000425	-0.882812	586
000425	-0.188389	586
000425	0.217613	586
000488	0.701464	586
000488	0.653176	590
000488	-0.193984	590
000488	0.509321	590
000488	0.185887	590
000488	-0.343068	590
000488	0.00947	590
000488	-0.335328	590
000488	-0.14133	590
000488	-0.547959	590
000488	-0.786287	590
000488	-1.70718	590
000488	-1.46993	590
000488	-2.11917	595
000488	-0.440304	595
000488	-0.16744	595
000488	-0.540816	595
000488	-0.222025	595
000488	1.25956	595
000488	0.452463	595
000488	1.18325	595
000488	-0.193321	595
000505	0.347371	597
000505	-0.511606	597
000505	0.502872	597
000505	-3.46309	597
000505	-19.5537	597
000505	1.76213	597
000505	4.12434	597
000505	0.324999	597
000505	3.0809	597
000505	-0.24958	597
000505	2.39141	597
000505	-1.31638	597
000510	-0.223009	597
000510	0.953557	605
000510	-2.42452	607
000510	-1.31227	607
000510	0.015528	607
000510	3.23254	615
000510	7.6465	615
000510	-1.2111	615
000510	-1.33005	615
000510	69.3872	615
000510	-1.24922	617
000510	-0.163167	617
000510	-0.678498	617
000510	-70.5521	617
000510	0.370046	622
000510	0.563069	622
000510	-0.946043	622
000510	-0.214892	622
000510	-0.055463	622
000510	1.04203	622
000510	0.821376	622
000513	-0.07906	622
000513	-0.366505	622
000513	-0.071111	622
000513	-0.118767	623
000513	-0.085052	623
000513	0.268937	623
000513	0.262255	623
000513	0.218511	623
000513	0.245621	623
000513	0.195993	623
000513	0.12112	623
000513	-0.31243	623
000513	-0.356482	623
000513	-0.294664	623
000513	-0.446529	623
000513	-0.487751	623
000513	-0.467697	625
000513	-0.494064	625
000513	-0.095542	625
000513	-0.349117	625
000513	0.467765	625
000513	-0.134943	625
000518	-0.023832	625
000518	-0.184794	625
000518	0.547402	625
000518	-0.567319	625
000518	-0.375444	625
000518	0.392521	625
000518	-0.077483	625
000518	-0.229995	627
000518	1.24846	627
000518	-0.948081	627
000518	-0.224334	627
000518	-1.34002	627
000518	8.85537	633
000518	-0.843012	633
000518	-0.426043	633
000518	0.069535	633
000518	-0.062048	633
000518	-0.403366	633
000518	2.82992	635
000518	5.94799	635
000519	-3.68164	635
000519	-11996.6	635
000519	-0.138332	635
000519	-0.615903	635
000519	0.056622	635
000519	6.88426	635
000519	0.108076	635
000519	-0.571015	635
000519	-2.35316	635
000519	-1.79958	635
000519	-0.408696	635
000519	26.1929	636
000519	1.61065	636
000519	1.724	636
000519	0.176963	636
000519	-0.19265	636
000519	0.154141	636
000519	0.441151	636
000519	0.553657	636
000519	7.04286	636
000519	-0.206365	636
000519	3.41104	636
000521	0.838609	636
000521	0.75027	636
000521	2.18751	650
000521	4.35829	650
000521	3.2957	650
000521	0.187828	650
000521	-0.112102	650
000521	-0.386841	650
000521	0.121594	650
000521	-0.516641	650
000521	-0.393342	650
000521	-0.563093	650
000521	0.182931	650
000521	-0.2637	650
000521	-0.369327	650
000521	-0.427521	651
000521	-0.310378	651
000521	-0.340005	651
000521	-0.11146	651
000521	-0.244548	651
000521	-1.00397	651
000521	-10.6248	651
000523	-1.62311	651
000523	0.097635	651
000523	-0.495904	651
000523	-2.16715	651
000523	5.44614	651
000523	-2.19541	651
000523	0.835534	661
000523	-0.117148	661
000523	-0.055351	661
000523	-0.117914	661
000523	0.283155	661
000523	1.1257	661
000523	1.06707	661
000523	-0.55149	661
000523	-1.27456	661
000523	-27.3485	661
000523	-1.07278	661
000523	-1.23294	661
000523	-2.85487	661
000523	7.35186	663
000523	0.82067	663
000525	0.037289	663
000525	-0.002245	663
000525	-0.051	663
000525	0.548175	663
000525	0.302879	663
000525	-0.646199	669
000525	0.165747	670
000525	0.028124	670
000525	-0.25583	670
000525	0.882838	670
000525	1.42504	670
000525	-0.03208	670
000525	0.781119	676
000525	0.549093	676
000525	0.545254	676
000525	0.175351	677
000525	0.30287	677
000525	0.53853	677
000525	-0.041306	677
000525	1.84328	677
000525	2.04789	677
000528	-0.060297	677
000528	51.4096	677
000528	-0.538469	677
000528	-1.38843	677
000528	17.018	678
000528	-0.844638	678
000528	-0.954916	678
000528	-1.61666	678
000528	-2.64608	678
000528	-1.56107	678
000528	-159.206	678
000528	-0.554214	678
000528	-0.731626	678
000528	-2.64989	678
000528	6.99894	678
000528	-1.33116	678
000528	-1.32553	678
000528	-0.961162	680
000528	-0.75728	680
000528	-1.13531	680
000528	-0.875295	680
000528	-0.020355	680
000529	-6.93422	680
000529	-1.07223	680
000529	-2.0099	680
000529	-0.682261	680
000529	-2.11388	680
000529	-1.79991	680
000529	-0.66174	680
000529	-0.982298	680
000529	-1.29641	682
000529	-1.224	682
000529	-2.22983	682
000529	-2.19808	682
000529	-5.63299	682
000529	7.83306	682
000529	-0.285912	682
000529	0.38461	683
000530	0.88091	683
000530	0.81122	683
000530	-0.368824	683
000530	0.079002	683
000530	0.215494	683
000530	0.456535	683
000530	0.261705	683
000530	-0.173189	683
000530	-2.29019	683
000530	-0.550521	683
000530	0.009296	683
000530	-0.024115	683
000530	-0.060254	691
000530	-0.229416	691
000530	-0.224903	691
000530	-0.172642	691
000530	0.386977	697
000530	-0.463893	697
000530	2.22544	697
000530	-2.67726	697
000530	-0.072794	697
000530	-0.147593	698
000533	-1.18421	700
000533	-0.503937	700
000533	0.56593	700
000533	0.080793	700
000533	-1.13987	700
000533	-0.56911	700
000533	-0.083527	700
000533	8.79818	700
000533	6.00275	700
000533	-0.135779	700
000533	-0.284273	700
000533	0.922483	700
000533	-0.27904	700
000533	-0.204609	703
000533	-0.977654	703
000533	2.69665	703
000533	0.560813	703
000533	2.46541	703
000533	-2.77585	703
000533	-11.9378	703
000534	-1.01885	703
000534	-7.98291	703
000534	311.564	703
000534	-0.627308	703
000534	-1.10414	703
000534	-3.69466	703
000534	0.237774	707
000534	0.501258	707
000534	0.529124	707
000534	-0.452292	707
000534	38.37	707
000534	1.54398	707
000534	0.317947	707
000534	0.582164	707
000534	1.45638	707
000534	0.376382	710
000534	0.632849	710
000534	0.035884	710
000534	-0.230403	710
000534	-0.374344	710
000534	-0.095987	710
000534	0.315533	725
000536	-0.286296	725
000536	0.24622	725
000536	-0.450977	725
000536	-0.181094	725
000536	-0.212125	725
000536	1.6321	725
000536	1.63589	725
000536	-0.093483	725
000536	1.67908	725
000536	0.422838	725
000536	-0.405774	725
000536	-1.38644	725
000538	1.88617	727
000538	0.429665	727
000538	-2.55287	727
000538	0.541318	727
000538	-11.7089	727
000538	0.712785	727
000538	3.20172	727
000538	-0.315962	727
000538	-1.026	727
000538	-6.99056	727
000538	0.486043	727
000538	-0.527296	727
000538	-0.514171	731
000538	1.7395	731
000538	-0.321801	731
000538	0.02011	731
000538	-0.749737	731
000538	-0.515032	731
000538	2.96881	731
000538	0.624208	731
000538	-0.219457	731
000538	-0.517941	731
000541	0.351997	731
000541	-0.036204	731
000541	0.57073	731
000541	1.12795	733
000541	0.304755	733
000541	-2.32835	733
000541	0.516343	733
000541	-0.741157	733
000541	-0.313683	733
000541	0.446023	733
000541	0.692427	733
000541	-0.981833	733
000541	-31.0137	733
000541	-0.487767	733
000541	-0.995847	733
000541	2.49614	733
000541	1.35357	737
000541	2.11659	737
000541	-0.084857	737
000541	0.627033	737
000541	-0.308955	737
000541	0.053491	737
000545	0.122682	737
000545	16.1001	737
000545	-20.1956	738
000545	-0.416948	738
000545	9.25607	738
000545	-0.263617	738
000545	-1.25254	738
000545	-0.780987	738
000545	-4.23501	738
000545	-0.329947	738
000545	-1.84847	738
000545	-0.261541	738
000545	0.06665	738
000545	1.21732	738
000545	-0.400936	738
000545	5.89913	739
000545	3.75199	739
000545	2.33664	739
000545	0.417725	739
000547	0.386808	739
000547	0.2022	739
000547	1.0113	739
000547	0.868493	739
000547	0.57782	739
000547	0.294529	739
000547	-0.266017	739
000547	-0.438517	739
000547	0.220531	739
000547	-3.00216	755
000547	1.7413	755
000547	3.28208	755
000547	-0.269252	755
000547	-0.577323	755
000547	-0.992187	755
000547	-0.624064	756
000547	-3.17918	756
000547	-1.1042	756
000547	-0.633499	756
000547	-0.158349	756
000547	-1.10382	756
000547	-0.365437	756
000550	0.496112	756
000550	2.41295	756
000550	-89.7028	756
000550	-0.689019	756
000550	-8.37743	756
000550	63.2166	756
000550	-0.513767	757
000550	1.01431	757
000550	-2.10789	757
000550	1.6888	757
000550	-2.0623	757
000550	-0.856917	757
000550	-0.169959	766
000550	0.483219	766
000550	-0.234992	766
000550	-3.41179	766
000550	-0.385132	766
000550	-6.74081	766
000550	-0.951403	766
000550	-6.38321	766
000550	1.3899	766
000553	2.53905	766
000553	16.4522	766
000553	-1.55459	766
000553	0.490572	766
000553	-0.347837	768
000553	-1.34704	768
000553	-0.097165	768
000553	-0.804076	768
000553	-0.368611	768
000553	-0.519437	768
000553	-0.488843	768
000553	-0.54078	768
000553	1.92199	768
000553	-0.687275	768
000553	-0.372372	768
000553	-0.034785	768
000553	-0.337574	768
000553	-0.582042	777
000553	-0.790149	777
000553	-0.598337	777
000553	-1.58146	777
000553	0.21313	777
000559	1.68438	777
000559	-1.43669	777
000559	-0.965399	777
000559	-1.06988	777
000559	-0.648276	777
000559	-3.0185	777
000559	-0.045339	777
000559	7.22155	777
000559	0.314211	782
000559	-0.44004	782
000559	1.01944	782
000559	-0.553672	782
000559	0.377326	782
000559	0.170024	782
000559	0.033697	782
000559	-0.962293	782
000559	-0.280005	782
000559	0.594192	782
000559	0.243421	782
000559	0.489009	782
000559	-0.303676	782
000559	0.243305	788
000561	-0.844877	788
000561	-0.112814	788
000561	-0.603666	788
000561	-0.990782	788
000561	0.481592	788
000561	-0.068792	788
000561	-0.438595	788
000561	0.81509	788
000561	0.103982	788
000561	0.094501	788
000561	-0.15199	788
000561	56.6611	788
000561	0.089352	790
000561	0.035526	790
000561	0.937084	790
000565	-0.072891	790
000565	0.334716	790
000565	-2.51292	790
000565	-0.565377	790
000565	-0.195366	790
000565	-0.73005	790
000565	0.182683	791
000565	-1.1222	792
000565	-0.197836	792
000565	0.291804	792
000565	-5.72246	792
000565	-2.57231	792
000565	-0.926853	792
000565	-65.132	792
000565	-0.156756	792
000565	-0.735127	792
000565	-0.466359	792
000565	0.616761	792
000565	0.050372	800
000565	0.352259	800
000565	0.166524	800
000565	-0.016825	800
000566	-0.124045	800
000566	-0.434739	800
000566	-2.13466	800
000566	-0.608853	800
000566	0.717036	800
000566	0.74957	800
000566	-0.209628	800
000566	0.631682	800
000566	-1.20948	800
000566	0.408246	801
000566	0.004051	801
000566	-0.348772	801
000566	-0.210084	801
000566	-0.382671	801
000566	-0.351834	801
000566	2.32311	801
000566	-0.735239	801
000566	-1.47287	801
000566	-0.311444	801
000568	11.2428	801
000568	0.028049	801
000568	-0.839285	801
000568	0.760212	803
000568	0.057773	810
000568	-4.42022	810
000568	-0.428265	810
000568	5.87641	810
000568	-3.2946	810
000568	1.68931	810
000568	-1.14317	810
000568	-8.27367	810
000568	136.72	810
000568	-1.00425	810
000568	-21.3523	811
000568	-1.48355	811
000568	-0.289417	811
000568	-1.5208	811
000568	-0.556805	811
000568	-1.02092	811
000568	-1.29553	811
000568	-0.595107	811
000570	-1.16948	811
000570	-33.8778	811
000570	0.7418	811
000570	-0.363247	811
000570	0.267652	811
000570	-1.07356	813
000570	4.53479	813
000570	3.77793	813
000570	-15.4592	813
000570	-1.97467	813
000570	0.318863	813
000570	-0.678827	813
000570	-1.39274	816
000570	-0.613398	816
000570	-0.755227	816
000570	-0.011712	816
000570	0.055631	816
000570	-2.40189	816
000570	-1.49527	816
000570	1.59534	816
000570	-0.017416	816
000572	-6.94541	816
000572	0.24629	816
000572	0.056641	818
000572	0.349434	818
000572	-0.944493	818
000572	-0.95055	818
000572	-0.659785	818
000572	0.256395	818
000572	0.034356	818
000572	2.06502	818
000572	-0.564614	818
000572	-4.48871	818
000572	4.26006	818
000572	-0.475053	818
000572	0.082002	821
000572	-0.05169	821
000572	-0.560113	821
000576	-0.046034	821
000576	-0.740321	821
000576	-7.63117	821
000576	-0.550077	821
000576	-0.22731	821
000576	-0.350008	821
000576	-0.255795	821
000576	-0.70976	821
000576	0.714866	821
000576	-0.417171	821
000576	0.100455	822
000576	-12.0637	822
000576	-0.781763	822
000576	2.49846	822
000576	-69.404	822
000576	0.521973	822
000576	0.261011	822
000576	1.38832	822
000581	0.549232	822
000581	19.1787	822
000581	-0.411956	822
000581	0.279428	822
000581	0.164484	823
000581	0.000754	823
000581	0.28477	823
000581	-0.224244	823
000581	-0.052275	823
000581	0.488002	823
000581	-0.163645	823
000581	-0.719456	823
000581	-0.683163	823
000581	-0.510275	823
000581	-0.242247	823
000581	-0.121729	823
000581	0.431577	823
000581	-0.00885	830
000581	-0.201985	830
000581	0.078429	830
000581	0.126889	830
000581	-0.025695	830
000584	-0.176349	830
000584	-0.108215	830
000584	-0.582931	830
000584	-0.193862	830
000584	0.217195	830
000584	-0.385348	830
000584	-0.66904	830
000584	0.147815	830
000584	-0.441977	836
000584	2.20739	836
000584	-2.74781	836
000584	2.98283	836
000584	-1.66233	836
000584	-0.601785	836
000584	0.785042	836
000584	0.169564	836
000584	-0.348561	836
000584	-0.224266	836
000584	-0.144397	836
000584	-1.32843	836
000584	-1.03322	836
000584	-1.5766	837
000586	-0.685498	837
000586	-1.49481	837
000586	-1.77609	837
000586	-1.11319	837
000586	-1.17464	837
000586	-2.39956	837
000586	-7.78347	837
000586	-0.881919	837
000586	1.15194	837
000586	-6.73259	837
000586	-1.71313	837
000586	-1.09891	852
000586	-17.7453	852
000586	3.34238	852
000586	-0.043055	852
000586	2.39607	852
000586	1.46957	852
000586	0.796571	852
000587	-0.165555	852
000587	0.312918	852
000587	-0.123296	852
000587	0.537091	852
000587	-0.37526	852
000587	-0.318033	852
000587	-0.294845	856
000587	-0.46674	856
000587	-0.241507	856
000587	-0.213499	856
000587	-0.492645	856
000587	0.614808	856
000589	-12.9496	856
000589	-1.92173	856
000589	0.528376	856
000589	1.71871	856
000589	-26.44	856
000589	0.529963	862
000589	-1.61816	862
000589	-0.96683	862
000589	1.30384	862
000589	-19.708	868
000589	4.8059	868
000589	-0.115539	868
000589	-0.130082	868
000589	0.813096	868
000589	0.342542	868
000589	0.285474	868
000589	0.093472	868
000589	-0.925769	868
000589	0.68835	868
000589	-0.023385	868
000589	0.472581	880
000589	-0.112867	880
000590	-0.061049	880
000590	-27.5366	880
000590	-1.06324	880
000590	-18.2863	880
000590	-0.420402	880
000590	-1.56177	880
000590	-0.009923	880
000590	0.694364	880
000590	0.718186	880
000590	-0.093177	880
000590	3.69912	880
000590	1.22916	881
000590	-1.45271	881
000590	1.55332	881
000590	1.22603	881
000590	29.3973	881
000590	-0.411396	881
000590	-0.007848	893
000590	-4.29012	893
000590	0.209191	893
000590	0.48055	893
000595	0.165125	901
000595	-0.944331	901
000595	0.795224	901
000595	-0.235056	901
000595	-13.1313	901
000595	-6.40912	901
000595	0.428415	901
000595	2.18666	901
000595	0.104161	901
000595	1.21104	901
000595	17.6437	901
000595	2.29755	901
000595	-2.46632	901
000595	19.3331	902
000595	14.5302	902
000595	1.43197	902
000595	-0.409543	902
000595	-0.849047	902
000596	-0.133691	902
000596	-13.4173	902
000596	0.525802	902
000596	0.687329	902
000596	-0.735194	902
000596	2.19262	903
000596	1.79942	903
000596	-3.62604	903
000596	-251.863	903
000596	-3.11214	903
000596	-7.89513	903
000596	5.04813	903
000596	-0.884826	903
000596	-1.07004	903
000596	17.8065	903
000596	4.5239	903
000596	-5.31097	903
000596	1.47432	903
000596	-0.718184	908
000597	1.50256	908
000597	-2.09689	908
000597	-3.79052	908
000597	-88.9172	908
000597	-1.35241	908
000597	0.376192	908
000597	0.037123	908
000597	0.666202	908
000597	-0.550215	909
000597	-2.66008	912
000597	-0.524599	912
000597	0.070782	912
000597	-0.915915	912
000597	0.294523	912
000597	0.070324	912
000597	-4.75195	912
000597	1.54512	912
000597	2.93469	912
000597	-3.30917	912
000597	-27.4316	913
000597	3.94099	913
000597	0.226244	913
000599	0.364188	913
000599	0.013711	913
000599	0.354305	913
000599	-0.155667	913
000599	-3.17048	913
000599	-0.616473	913
000599	-0.13476	913
000599	18.2746	913
000599	-0.385793	913
000599	-1.24206	915
000599	-0.555234	915
000599	-0.275127	915
000599	-0.072634	915
000599	-0.352549	915
000599	-0.576031	915
000599	-0.729876	915
000599	-0.795164	915
000599	-0.308595	915
000599	-0.384281	915
000599	7.74756	915
000599	-25.6932	915
000599	-0.851753	915
000612	2.79625	919
000612	-39.8853	919
000612	-0.444032	919
000612	-0.716928	919
000612	2.59359	919
000612	3.30841	919
000612	-2.6246	919
000612	-11.8798	919
000612	0.525888	919
000612	-1.7861	919
000612	-0.476913	919
000612	-0.604572	919
000612	0.559287	919
000612	9.77183	920
000612	13.537	920
000612	-6.54593	920
000612	-4.48153	920
000612	0.029964	920
000612	-1.03893	920
000612	-0.983244	920
000612	-3.26307	920
000612	-0.257605	920
000619	-6.84809	920
000619	0.351318	920
000619	-0.494601	920
000619	-1.33848	921
000619	-0.005203	921
000619	-0.874517	921
000619	-0.741962	921
000619	-0.412313	921
000619	0.892905	921
000619	-3.23231	921
000619	2.655	921
000619	-1.4601	921
000619	-0.439766	921
000619	45.6782	921
000619	-1.36698	922
000619	-1.24722	922
000619	1.68651	922
000619	0.244613	922
000619	-0.33747	922
000619	-3.11589	922
000619	0.390214	922
000619	0.132395	922
000622	-0.395645	922
000622	-1.06491	922
000622	-0.012784	923
000622	-0.722058	923
000622	0.578146	923
000622	0.348011	923
000622	0.577657	923
000622	-0.074224	923
000622	-0.68668	923
000622	0.129674	925
000622	-0.025153	925
000622	-0.281581	925
000622	-0.267809	925
000623	0.474257	925
000623	-0.093771	925
000623	-0.622631	925
000623	-0.234729	925
000623	-1.98669	925
000623	1.61023	925
000623	-0.163889	925
000623	0.535478	925
000623	-10.9926	925
000623	-1.55743	927
000623	-0.035043	927
000623	-0.677097	927
000623	0.009162	927
000623	-0.943827	927
000623	-0.755417	927
000623	0.206455	927
000623	-0.506696	930
000623	-1.12732	930
000623	-0.989071	930
000623	-3.90886	930
000623	-1.90015	930
000623	2.84438	930
000625	-0.467618	930
000625	2.58372	930
000625	-2.49633	930
000625	-0.744506	930
000625	-1.56246	930
000625	-1.8497	930
000625	2.81857	931
000625	0.130624	931
000625	0.520366	931
000625	0.370789	931
000625	-36.7809	931
000625	-0.58255	931
000625	0.171026	936
000625	-67.37	936
000625	-0.775392	936
000625	-0.374511	936
000625	-0.407008	936
000625	0.263772	936
000625	0.672765	936
000625	-0.390582	936
000625	0.095842	936
000625	-0.63413	936
000629	-0.844029	936
000629	-0.793064	936
000629	0.566723	936
000629	-0.630655	938
000629	1.52786	938
000629	-1.54281	938
000629	-0.266703	938
000629	-0.243842	938
000629	0.2038	938
000629	-0.293733	938
000629	0.002585	938
000629	-0.240987	938
000629	-0.291146	938
000629	-0.341858	938
000629	-0.53998	938
000629	0.410077	949
000629	-0.057064	949
000629	-0.161896	949
000629	2.1632	949
000630	-0.398428	949
000630	-0.532049	949
000630	0.993038	949
000630	-0.532267	949
000630	-0.374115	949
000630	0.068513	949
000630	0.14579	949
000630	-0.351427	949
000630	-0.050098	949
000630	0.14193	950
000630	-0.840256	950
000630	0.17662	950
000630	-0.207086	950
000630	-0.475207	950
000630	0.35512	951
000630	0.284954	951
000630	0.061217	951
000630	0.099649	951
000630	-0.113916	951
000630	0.125445	951
000630	-0.233815	951
000630	0.895363	951
000633	0.73615	951
000633	0.807241	951
000633	6.67236	951
000633	-20.0428	951
000633	-5.77873	951
000633	-0.254127	952
000633	-1.23552	952
000633	-1.02047	952
000633	-1.11403	952
000633	-1.20244	952
000633	-1.10464	952
000633	-1.10778	952
000633	-1.5245	952
000633	-0.953755	952
000635	-1.01794	952
000635	-1.36774	952
000635	-1.83775	952
000635	-1.61836	952
000635	-1.51814	953
000635	-2.58497	953
000635	-3.37348	953
000635	-3.51125	953
000635	-4.56017	953
000635	-3.82253	957
000635	-1.82169	957
000635	-2.06555	957
000635	-0.107084	957
000635	0.699896	957
000635	1.03862	957
000635	-0.189257	957
000635	0.007136	957
000635	0.116362	957
000635	-0.83546	957
000635	-10.0341	957
000635	-0.744612	957
000636	-0.350179	957
000636	-0.142663	967
000636	-0.775504	967
000636	-1.6495	967
000636	0.073283	967
000636	-0.787648	967
000636	-1.24796	967
000636	2.77826	967
000636	0.369614	967
000636	-1.0752	970
000636	0.241384	970
000636	-1.34408	970
000636	1.53611	970
000636	1.12649	970
000636	-0.012784	970
000636	-1.6332	970
000636	-1.1489	970
000636	-1.8739	970
000636	-0.834605	970
000636	0.921695	970
000636	-0.200535	970
000636	-0.72623	970
000637	-0.341776	976
000637	-1.05017	976
000637	0.400836	976
000637	0.257432	976
000637	-0.608483	976
000637	1.02609	976
000637	0.186942	976
000637	-0.699715	976
000637	0.222046	976
000637	-1.01048	976
000637	-0.168552	976
000637	-0.66318	977
000637	-1.4743	977
000637	-1.77548	977
000637	-79.2004	977
000637	3.89888	977
000637	0.004382	977
000637	2.24178	977
000637	1.00396	977
000637	-0.499128	977
000637	-0.509861	977
000637	-1.57864	977
000639	0.456836	977
000639	-0.622041	977
000639	-0.689072	980
000639	-0.514803	980
000639	-0.243015	980
000639	2.64864	980
000639	8.07143	980
000639	3.36269	980
000639	-0.308853	980
000639	0.981846	980
000639	-0.762678	980
000639	-1.11147	980
000639	-0.691853	980
000639	-0.88884	981
000639	0.86505	981
000639	10.1929	981
000639	-0.087888	985
000639	-0.099379	985
000639	-1.0327	985
000639	0.2932	985
000639	4.48521	985
000650	1.15929	985
000650	-0.291073	985
000650	0.013669	985
000650	-0.149086	985
000650	-5.61238	985
000650	-0.379863	985
000650	-3.05143	985
000650	0.845828	985
000650	-9.64961	988
000650	0.460173	988
000650	-0.263673	988
000650	3.56187	988
000650	1.30748	988
000650	1.9298	988
000650	0.364893	988
000650	0.065032	988
000650	0.595162	988
000650	-0.676957	988
000650	-0.930215	988
000651	-0.591183	988
000651	-0.539099	988
000651	-0.754206	989
000651	-0.915429	989
000651	-0.995299	989
000651	-0.35092	989
000651	-0.868957	989
000651	-0.314904	989
000651	-0.686284	989
000651	-0.266083	989
000651	0.204456	989
000651	0.292364	989
000651	0.43086	989
000651	0.030114	989
000651	-106.704	989
000651	-0.20106	990
000651	-2.0616	990
000651	-8.74753	990
000651	0.317242	990
000651	-1.0878	990
000651	0.55571	990
000657	-0.39769	990
000657	-2.30369	990
000657	0.250159	990
000657	-0.911192	990
000657	-0.533391	990
000657	1.16023	990
000657	-0.20588	990
000657	-0.355231	999
000657	-0.155991	999
000657	0.004491	999
000657	0.87107	999
000657	1.55415	999
000657	4.15882	999
000657	-0.158785	999
000657	-0.2993	999
000657	-4.01762	999
000657	-0.510008	999
000659	-1.54436	999
000659	-1.97152	999
000659	0.338264	999
000659	-199.692	1207
000659	-0.821281	1207
000659	-0.660095	1207
000659	3.91182	1208
000659	0.890242	1208
000659	2.16054	1208
000659	-1.76426	1217
000659	-8.4656	1217
000659	-3.12884	1217
000659	-0.745848	1218
000659	-1.57151	1218
000659	-0.721427	1218
000659	-2.65771	1223
000659	-3.11865	1225
000659	0.8491	1229
000659	0.657585	1229
000661	3.04846	1231
000661	-48.531	1231
000661	-0.135238	1238
000661	-0.391713	1238
000661	55.1641	1255
000661	0.188287	1255
000661	0.307376	1256
000661	0.083778	1259
000661	3.34366	1259
000661	1.97502	1260
000661	0.766861	1266
000661	2.17144	1266
000661	4.20925	1268
000661	7.35179	1268
000661	2.98169	1270
000661	1.0049	1278
000661	0.629151	1282
000661	-0.710473	1283
000661	-0.572399	1283
000661	0.038903	1288
000661	0.355237	1288
000661	0.263475	1308
000663	-0.623368	1308
000663	0.678471	1309
000663	0.233512	1309
000663	2.20948	1311
000663	1.6263	1314
000663	0.616644	1319
000663	-0.95202	1319
000663	1.39153	1323
000663	3.03535	1323
000663	171.97	1324
000663	0.766815	1328
000663	-0.165651	1332
000663	0.674553	1333
000663	1.0357	1336
000663	0.058788	1336
000663	-0.375577	1339
000663	-0.046513	1339
000663	-0.153253	1360
000663	0.175454	1367
000663	-0.180989	1373
000663	-1.35681	1380
000670	-0.775405	1696
000670	0.043576	1696
000670	-0.542474	1696
000670	1.52985	1696
000670	10.0715	1696
000670	-3.3787	1696
000670	0.560876	1696
000670	-0.20797	1696
000670	-0.607632	1696
000670	0.016631	1696
000672	-0.795799	1696
000672	-1.21071	1696
000672	0.180169	1696
000672	0.783163	2001
000672	-2.46511	2001
000672	1.19758	2001
000672	0.091303	2001
000672	-2.02654	2001
000672	0.703424	2001
000672	-0.52051	2001
000672	-1.3801	2001
000672	0.960899	2001
000672	-1.16862	2001
000672	20.889	2001
000677	0.832215	2001
000677	0.267132	2001
000677	0.728995	2002
000677	-0.784699	2002
000677	0.212019	2002
000677	0.032929	2002
000677	1.58817	2002
000677	0.34546	2002
000677	0.272361	2002
000677	0.124381	2002
000677	0.062681	2002
000677	0.083853	2003
000677	0.064226	2004
000677	0.029015	2004
000677	-0.171339	2004
000677	-0.076683	2004
000677	-0.256277	2004
000677	-0.325191	2004
000677	-0.306831	2004
000678	-0.135342	2004
000678	-0.036996	2004
000678	-0.219193	2004
000678	-2.03725	2004
000678	-1.27465	2004
000678	0.840872	2004
000678	2.69855	2005
000678	-0.468027	2005
000678	-0.534001	2005
000678	-1.11815	2005
000678	-6.71106	2005
000678	0.584795	2005
000678	-0.836464	2005
000678	-0.383204	2005
000678	-0.374397	2006
000678	-0.827795	2006
000678	-1.35183	2006
000678	0.334018	2006
000678	4.42142	2006
000680	142.669	2006
000680	5.17159	2006
000680	10.715	2006
000680	8.1665	2006
000680	-0.36671	2006
000680	4.85807	2006
000680	0.823249	2006
000680	0.367853	2007
000680	2.28076	2007
000680	-0.284449	2007
000680	0.531078	2007
000680	-0.097123	2007
000680	0.702614	2007
000680	0.321803	2007
000680	0.665028	2007
000680	0.176564	2007
000680	-0.409548	2007
000680	-2.02062	2007
000680	1.41227	2007
000680	-1.10114	2007
000680	-0.478806	2008
000680	0.107278	2008
000683	1.33227	2008
000683	-0.023431	2008
000683	1.01129	2008
000683	5.76422	2008
000683	-3.49903	2008
000683	2.98626	2008
000683	1.29838	2008
000683	-0.445722	2008
000683	-0.570534	2008
000683	-0.38412	2008
000683	1.10755	2008
000683	-0.179855	2009
000683	-0.634859	2009
000683	0.415107	2009
000683	0.596104	2009
000683	-0.678222	2009
000683	1.09265	2009
000683	-0.608105	2009
000683	-0.949298	2009
000683	-0.367639	2009
000683	1.8673	2009
000691	-1.32357	2009
000691	-0.731282	2009
000691	-0.420303	2009
000691	0.119447	2010
000691	-3.5003	2010
000691	-17.5972	2010
000691	0.192794	2010
000691	-2.63101	2010
000691	-0.179868	2010
000691	0.008748	2010
000691	0.049341	2011
000691	-2.10397	2011
000691	-1.05803	2011
000695	-2.79821	2011
000695	-17.5566	2011
000695	-1.95535	2011
000695	2.21805	2011
000695	2.84409	2011
000695	-0.903621	2011
000695	0.073007	2011
000695	0.756625	2011
000695	0.349751	2011
000695	3.03916	2011
000695	0.60169	2013
000695	-0.171759	2017
000695	0.760499	2017
000695	0.079505	2017
000695	-1.55339	2017
000695	1.22672	2017
000695	-0.019391	2017
000695	-0.887101	2017
000695	-0.728358	2017
000695	0.912268	2017
000697	-0.312426	2017
000697	-0.102568	2017
000697	-3.07207	2017
000697	-6.2933	2017
000697	4.34691	2019
000697	-1.37858	2019
000697	-0.788998	2019
000697	-2.279	2019
000697	6.37718	2019
000697	0.942922	2019
000697	3.18225	2019
000697	0.938583	2019
000697	-0.169695	2019
000697	-0.500833	2019
000697	0.048583	2019
000697	0.633212	2019
000697	2.09493	2020
000697	27.0843	2020
000698	10.8906	2020
000698	0.67392	2020
000698	-0.102504	2020
000698	1.0591	2020
000698	0.131355	2020
000698	-0.21084	2020
000698	-3.78447	2020
000698	-41.012	2020
000698	1.69684	2020
000698	-0.843864	2020
000698	22.2404	2020
000698	0.757654	2021
000698	13.2935	2021
000698	-0.75359	2021
000698	0.052728	2021
000698	0.494205	2021
000698	1.29045	2021
000698	-0.289414	2021
000698	2.70895	2021
000698	-0.730078	2022
000698	-3.93688	2022
000698	0.735826	2022
000700	-1.06003	2022
000700	-1.21703	2022
000700	-0.329662	2022
[truncated: 25,532 more rows]
