# Supplementary material for: How corporate ESG performance enables New-qualitive Productive forces development based on Listed companies in the manufacturing industry: Evidence from China
Source: Research Square preprint supplement (doi:10.21203/rs.3.rs-6158355/v1), 2025-07-24
Supplement: Supplementary file 10 [file a941ac9659948dd5598acf67.xlsx]

## Sheet: sheet1
Symbol
证券代码
没有单位
000001
000001
000001
000001
000001
000001
000001
000001
000001
000001
000001
000001
000001
000002
000002
000002
000002
000002
000002
000002
000002
000002
000002
000002
000002
000002
000004
000004
000004
000004
000004
000004
000004
000004
000004
000004
000004
000004
000004
000005
000005
000005
000005
000005
000005
000005
000005
000005
000005
000005
000005
000006
000006
000006
000006
000006
000006
000006
000006
000006
000006
000006
000006
000006
000007
000007
000007
000007
000007
000007
000007
000007
000007
000007
000007
000007
000007
000008
000008
000008
000008
000008
000008
000008
000008
000008
000008
000008
000008
000008
000009
000009
000009
000009
000009
000009
000009
000009
000009
000009
000009
000009
000009
000010
000010
000010
000010
000010
000010
000010
000010
000010
000010
000010
000010
000010
000011
000011
000011
000011
000011
000011
000011
000011
000011
000011
000011
000011
000011
000012
000012
000012
000012
000012
000012
000012
000012
000012
000012
000012
000012
000012
000014
000014
000014
000014
000014
000014
000014
000014
000014
000014
000014
000014
000014
000016
000016
000016
000016
000016
000016
000016
000016
000016
000016
000016
000016
000016
000017
000017
000017
000017
000017
000017
000017
000017
000017
000017
000017
000017
000017
000018
000018
000018
000018
000018
000018
000018
000018
000019
000019
000019
000019
000019
000019
000019
000019
000019
000019
000019
000019
000019
000020
000020
000020
000020
000020
000020
000020
000020
000020
000020
000020
000020
000020
000021
000021
000021
000021
000021
000021
000021
000021
000021
000021
000021
000021
000021
000022
000022
000022
000022
000022
000022
000022
000023
000023
000023
000023
000023
000023
000023
000023
000023
000023
000023
000023
000023
000024
000024
000024
000024
000025
000025
000025
000025
000025
000025
000025
000025
000025
000025
000025
000025
000025
000026
000026
000026
000026
000026
000026
000026
000026
000026
000026
000026
000026
000026
000027
000027
000027
000027
000027
000027
000027
000027
000027
000027
000027
000027
000027
000028
000028
000028
000028
000028
000028
000028
000028
000028
000028
000028
000028
000028
000029
000029
000029
000029
000029
000029
000029
000029
000029
000029
000029
000029
000029
000030
000030
000030
000030
000030
000030
000030
000030
000030
000030
000030
000030
000030
000031
000031
000031
000031
000031
000031
000031
000031
000031
000031
000031
000031
000031
000032
000032
000032
000032
000032
000032
000032
000032
000032
000032
000032
000032
000032
000033
000033
000033
000033
000033
000033
000034
000034
000034
000034
000034
000034
000034
000034
000034
000034
000034
000034
000034
000035
000035
000035
000035
000035
000035
000035
000035
000035
000035
000035
000035
000035
000036
000036
000036
000036
000036
000036
000036
000036
000036
000036
000036
000036
000036
000037
000037
000037
000037
000037
000037
000037
000037
000037
000037
000037
000037
000037
000038
000038
000038
000038
000038
000038
000038
000038
000038
000038
000038
000039
000039
000039
000039
000039
000039
000039
000039
000039
000039
000039
000039
000039
000040
000040
000040
000040
000040
000040
000040
000040
000040
000040
000040
000040
000040
000042
000042
000042
000042
000042
000042
000042
000042
000042
000042
000042
000042
000042
000043
000043
000043
000043
000043
000043
000043
000043
000045
000045
000045
000045
000045
000045
000045
000045
000045
000045
000045
000045
000045
000046
000046
000046
000046
000046
000046
000046
000046
000046
000046
000046
000046
000048
000048
000048
000048
000048
000048
000048
000048
000048
000048
000048
000048
000048
000049
000049
000049
000049
000049
000049
000049
000049
000049
000049
000049
000049
000049
000050
000050
000050
000050
000050
000050
000050
000050
000050
000050
000050
000050
000050
000055
000055
000055
000055
000055
000055
000055
000055
000055
000055
000055
000055
000055
000056
000056
000056
000056
000056
000056
000056
000056
000056
000056
000056
000056
000056
000058
000058
000058
000058
000058
000058
000058
000058
000058
000058
000058
000058
000058
000059
000059
000059
000059
000059
000059
000059
000059
000059
000059
000059
000059
000059
000060
000060
000060
000060
000060
000060
000060
000060
000060
000060
000060
000060
000060
000061
000061
000061
000061
000061
000061
000061
000061
000061
000061
000061
000061
000061
000062
000062
000062
000062
000062
000062
000062
000062
000062
000062
000062
000062
000062
000063
000063
000063
000063
000063
000063
000063
000063
000063
000063
000063
000063
000063
000065
000065
000065
000065
000065
000065
000065
000065
000065
000065
000065
000065
000065
000066
000066
000066
000066
000066
000066
000066
000066
000066
000066
000066
000066
000066
000068
000068
000068
000068
000068
000068
000068
000068
000068
000068
000068
000068
000068
000069
000069
000069
000069
000069
000069
000069
000069
000069
000069
000069
000069
000069
000070
000070
000070
000070
000070
000070
000070
000070
000070
000070
000070
000070
000070
000078
000078
000078
000078
000078
000078
000078
000078
000078
000078
000078
000078
000078
000088
000088
000088
000088
000088
000088
000088
000088
000088
000088
000088
000088
000088
000089
000089
000089
000089
000089
000089
000089
000089
000089
000089
000089
000089
000089
000090
000090
000090
000090
000090
000090
000090
000090
000090
000090
000090
000090
000090
000096
000096
000096
000096
000096
000096
000096
000096
000096
000096
000096
000096
000096
000099
000099
000099
000099
000099
000099
000099
000099
000099
000099
000099
000099
000099
000100
000100
000100
000100
000100
000100
000100
000100
000100
000100
000100
000100
000100
000150
000150
000150
000150
000150
000150
000150
000150
000150
000150
000150
000150
000151
000151
000151
000151
000151
000151
000151
000151
000151
000151
000151
000151
000151
000153
000153
000153
000153
000153
000153
000153
000153
000153
000153
000153
000153
000153
000155
000155
000155
000155
000155
000155
000155
000155
000155
000155
000155
000155
000155
000156
000156
000156
000156
000156
000156
000156
000156
000156
000156
000156
000156
000156
000157
000157
000157
000157
000157
000157
000157
000157
000157
000157
000157
000157
000157
000158
000158
000158
000158
000158
000158
000158
000158
000158
000158
000158
000158
000158
000159
000159
000159
000159
000159
000159
000159
000159
000159
000159
000159
000159
000159
000166
000166
000166
000166
000166
000166
000166
000166
000166
000166
000301
000301
000301
000301
000301
000301
000301
000301
000301
000301
000301
000301
000301
000333
000333
000333
000333
000333
000333
000333
000333
000333
000333
000333
000338
000338
000338
000338
000338
000338
000338
000338
000338
000338
000338
000338
000338
000400
000400
000400
000400
000400
000400
000400
000400
000400
000400
000400
000400
000400
000401
000401
000401
000401
000401
000401
000401
000401
000401
000401
000401
000401
000401
000402
000402
000402
000402
000402
000402
000402
000402
000402
000402
000402
000402
000402
000403
000403
000403
000403
000403
000403
000403
000403
000403
000403
000403
000403
000403
000404
000404
000404
000404
000404
000404
000404
000404
000404
000404
000404
000404
000404
000407
000407
000407
000407
000407
000407
000407
000407
000407
000407
000407
000407
000407
000408
000408
000408
000408
000408
000408
000408
000408
000408
000408
000408
000408
000408
000409
000409
000409
000409
000409
000409
000409
000409
000409
000409
000409
000409
000409
000410
000410
000410
000410
000410
000410
000410
000410
000410
000410
000410
000410
000410
000411
000411
000411
000411
000411
000411
000411
000411
000411
000411
000411
000411
000411
000413
000413
000413
000413
000413
000413
000413
000413
000413
000413
000413
000413
000413
000415
000415
000415
000415
000415
000415
000415
000415
000415
000415
000415
000415
000415
000416
000416
000416
000416
000416
000416
000416
000416
000416
000416
000416
000416
000416
000417
000417
000417
000417
000417
000417
000417
000417
000417
000417
000417
000417
000417
000418
000418
000418
000418
000418
000418
000418
000418
000419
000419
000419
000419
000419
000419
000419
000419
000419
000419
000419
000419
000419
000420
000420
000420
000420
000420
000420
000420
000420
000420
000420
000420
000420
000420
000421
000421
000421
000421
000421
000421
000421
000421
000421
000421
000421
000421
000421
000422
000422
000422
000422
000422
000422
000422
000422
000422
000422
000422
000422
000422
000423
000423
000423
000423
000423
000423
000423
000423
000423
000423
000423
000423
000423
000425
000425
000425
000425
000425
000425
000425
000425
000425
000425
000425
000425
000425
000426
000426
000426
000426
000426
000426
000426
000426
000426
000426
000426
000426
000426
000428
000428
000428
000428
000428
000428
000428
000428
000428
000428
000428
000428
000428
000429
000429
000429
000429
000429
000429
000429
000429
000429
000429
000429
000429
000429
000430
000430
000430
000430
000430
000430
000430
000430
000430
000430
000430
000430
000430
000488
000488
000488
000488
000488
000488
000488
000488
000488
000488
000488
000488
000488
000498
000498
000498
000498
000498
000498
000498
000498
000498
000498
000498
000498
000498
000501
000501
000501
000501
000501
000501
000501
000501
000501
000501
000501
000501
000501
000502
000502
000502
000502
000502
000502
000502
000502
000502
000502
000502
000503
000503
000503
000503
000503
000503
000503
000503
000503
000503
000503
000503
000503
000504
000504
000504
000504
000504
000504
000504
000504
000504
000504
000504
000504
000504
000505
000505
000505
000505
000505
000505
000505
000505
000505
000505
000505
000505
000505
000506
000506
000506
000506
000506
000506
000506
000506
000506
000506
000506
000506
000506
000507
000507
000507
000507
000507
000507
000507
000507
000507
000507
000507
000507
000507
000509
000509
000509
000509
000509
000509
000509
000509
000509
000509
000509
000509
000509
000510
000510
000510
000510
000510
000510
000510
000510
000510
000510
000510
000510
000510
000511
000511
000511
000511
000511
000511
000511
000513
000513
000513
000513
000513
000513
000513
000513
000513
000513
000513
000513
000513
000514
000514
000514
000514
000514
000514
000514
000514
000514
000514
000514
000514
000514
000516
000516
000516
000516
000516
000516
000516
000516
000516
000516
000516
000516
000516
000517
000517
000517
000517
000517
000517
000517
000517
000517
000517
000517
000517
000517
000518
000518
000518
000518
000518
000518
000518
000518
000518
000518
000518
000518
000518
000519
000519
000519
000519
000519
000519
000519
000519
000519
000519
000519
000519
000519
000520
000520
000520
000520
000520
000520
000520
000520
000520
000520
000520
000520
000520
000521
000521
000521
000521
000521
000521
000521
000521
000521
000521
000521
000521
000521
000522
000522
000523
000523
000523
000523
000523
000523
000523
000523
000523
000523
000523
000523
000523
000524
000524
000524
000524
000524
000524
000524
000524
000524
000524
000524
000524
000524
000525
000525
000525
000525
000525
000525
000525
000525
000525
000525
000525
000525
000525
000526
000526
000526
000526
000526
000526
000526
000526
000526
000526
000526
000526
000526
000527
000527
000528
000528
000528
000528
000528
000528
000528
000528
000528
000528
000528
000528
000528
000529
000529
000529
000529
000529
000529
000529
000529
000529
000529
000529
000529
000529
000530
000530
000530
000530
000530
000530
000530
000530
000530
000530
000530
000530
000530
000531
000531
000531
000531
000531
000531
000531
000531
000531
000531
000531
000531
000531
000532
000532
000532
000532
000532
000532
000532
000532
000532
000532
000532
000532
000532
000533
000533
000533
000533
000533
000533
000533
000533
000533
000533
000533
000533
000533
000534
000534
000534
000534
000534
000534
000534
000534
000534
000534
000534
000534
000534
000536
000536
000536
000536
000536
000536
000536
000536
000536
000536
000536
000536
000536
000537
000537
000537
000537
000537
000537
000537
000537
000537
000537
000537
000537
000537
000538
000538
000538
000538
000538
000538
000538
000538
000538
000538
000538
000538
000538
000539
000539
000539
000539
000539
000539
000539
000539
000539
000539
000539
000539
000539
000540
000540
000540
000540
000540
000540
000540
000540
000540
000540
000540
000540
000541
000541
000541
000541
000541
000541
000541
000541
000541
000541
000541
000541
000541
000543
000543
000543
000543
000543
000543
000543
000543
000543
000543
000543
000543
000543
000544
000544
000544
000544
000544
000544
000544
000544
000544
000544
000544
000544
000544
000545
000545
000545
000545
000545
000545
000545
000545
000545
000545
000545
000545
000545
000546
000546
000546
000546
000546
000546
000546
000546
000546
000546
000546
000546
000546
000547
000547
000547
000547
000547
000547
000547
000547
000547
000547
000547
000547
000547
000548
000548
000548
000548
000548
000548
000548
000548
000548
000548
000548
000548
000548
000550
000550
000550
000550
000550
000550
000550
000550
000550
000550
000550
000550
000550
000551
000551
000551
000551
000551
000551
000551
000551
000551
000551
000551
000551
000551
000552
000552
000552
000552
000552
000552
000552
000552
000552
000552
000552
000552
000552
000553
000553
000553
000553
000553
000553
000553
000553
000553
000553
000553
000553
000553
000554
000554
000554
000554
000554
000554
000554
000554
000554
000554
000554
000554
000554
000555
000555
000555
000555
000555
000555
000555
000555
000555
000555
000555
000555
000555
000557
000557
000557
000557
000557
000557
000557
000557
000557
000557
000557
000557
000557
000558
000558
000558
000558
000558
000558
000558
000558
000558
000558
000558
000558
000558
000559
000559
000559
000559
000559
000559
000559
000559
000559
000559
000559
000559
000559
000560
000560
000560
000560
000560
000560
000560
000560
000560
000560
000560
000560
000560
000561
000561
000561
000561
000561
000561
000561
000561
000561
000561
000561
000561
000561
000562
000562
000562
000563
000563
000563
000563
000563
000563
000563
000563
000563
000563
000563
000563
000563
000564
000564
000564
000564
000564
000564
000564
000564
000564
000564
000564
000564
000564
000565
000565
000565
000565
000565
[truncated: 44,507 more rows]
