# Supplementary material for: How corporate ESG performance enables New-qualitive Productive forces development based on Listed companies in the manufacturing industry: Evidence from China
Source: Research Square preprint supplement (doi:10.21203/rs.3.rs-6158355/v1), 2025-07-24
Supplement: Supplementary file 11 [file d460098abb4e9ce2d4d126ad.xlsx]

## Sheet: sheet1
Symbol
证券代码
没有单位
000008
000008
000008
000008
000008
000008
000008
000008
000008
000012
000012
000012
000012
000012
000012
000012
000012
000012
000012
000012
000016
000016
000016
000016
000016
000016
000016
000016
000016
000016
000016
000017
000017
000017
000017
000017
000017
000017
000017
000020
000020
000020
000020
000020
000021
000021
000021
000021
000021
000021
000021
000021
000021
000021
000021
000030
000030
000030
000030
000030
000030
000030
000030
000030
000030
000030
000039
000039
000039
000039
000039
000039
000039
000039
000039
000039
000039
000045
000045
000045
000045
000045
000045
000045
000045
000045
000045
000045
000049
000049
000049
000049
000049
000049
000049
000049
000049
000049
000049
000050
000050
000050
000050
000050
000050
000050
000050
000050
000050
000050
000055
000055
000055
000055
000055
000055
000055
000055
000055
000055
000055
000059
000059
000059
000059
000059
000059
000059
000059
000059
000059
000059
000060
000060
000060
000060
000060
000060
000060
000060
000060
000060
000060
000063
000063
000063
000063
000063
000063
000063
000063
000063
000063
000063
000066
000066
000066
000066
000066
000066
000066
000066
000066
000066
000066
000070
000070
000070
000070
000070
000070
000070
000070
000070
000070
000070
000100
000100
000100
000100
000100
000100
000100
000100
000100
000100
000100
000153
000153
000153
000153
000153
000153
000153
000153
000153
000153
000153
000157
000157
000157
000157
000157
000157
000157
000157
000157
000157
000157
000301
000301
000301
000301
000301
000301
000333
000333
000333
000333
000333
000333
000333
000333
000333
000333
000333
000338
000338
000338
000338
000338
000338
000338
000338
000338
000338
000338
000400
000400
000400
000400
000400
000400
000400
000400
000400
000400
000400
000401
000401
000401
000401
000401
000401
000401
000401
000401
000401
000401
000403
000403
000403
000403
000403
000403
000403
000403
000403
000403
000403
000404
000404
000404
000404
000404
000404
000404
000404
000404
000404
000404
000408
000408
000408
000408
000408
000408
000410
000410
000410
000410
000410
000410
000410
000410
000410
000410
000410
000413
000413
000413
000413
000413
000413
000413
000413
000413
000413
000413
000418
000418
000418
000418
000418
000418
000420
000420
000420
000420
000420
000420
000420
000422
000422
000422
000422
000422
000422
000422
000422
000422
000422
000422
000423
000423
000423
000423
000423
000423
000423
000423
000423
000423
000423
000425
000425
000425
000425
000425
000425
000425
000425
000425
000425
000425
000488
000488
000488
000488
000488
000488
000488
000488
000488
000488
000488
000505
000505
000505
000505
000505
000505
000505
000509
000509
000509
000509
000509
000510
000510
000510
000510
000510
000510
000510
000510
000510
000510
000510
000511
000513
000513
000513
000513
000513
000513
000513
000513
000513
000513
000513
000518
000518
000518
000518
000518
000518
000518
000518
000519
000519
000519
000519
000519
000519
000519
000519
000519
000519
000519
000521
000521
000521
000521
000521
000521
000521
000521
000521
000521
000523
000523
000523
000523
000523
000523
000523
000523
000523
000523
000525
000525
000525
000525
000525
000525
000525
000525
000525
000525
000525
000528
000528
000528
000528
000528
000528
000528
000528
000528
000528
000528
000529
000529
000529
000529
000530
000530
000530
000530
000530
000530
000530
000530
000530
000530
000530
000533
000533
000533
000533
000533
000533
000533
000533
000533
000533
000533
000534
000534
000534
000534
000534
000534
000534
000534
000534
000536
000536
000536
000536
000536
000536
000536
000536
000536
000536
000536
000538
000538
000538
000538
000538
000538
000538
000538
000538
000538
000538
000541
000541
000541
000541
000541
000541
000541
000541
000541
000541
000541
000545
000545
000545
000545
000545
000545
000545
000545
000545
000545
000545
000546
000546
000546
000546
000546
000546
000546
000547
000547
000547
000547
000547
000547
000547
000547
000547
000547
000547
000550
000550
000550
000550
000550
000550
000550
000550
000550
000550
000550
000551
000551
000551
000551
000551
000551
000551
000551
000551
000551
000551
000553
000553
000553
000553
000553
000553
000553
000553
000553
000553
000553
000559
000559
000559
000559
000559
000559
000559
000559
000559
000559
000559
000561
000561
000561
000561
000561
000561
000561
000561
000561
000561
000561
000565
000565
000565
000565
000565
000565
000565
000565
000565
000565
000565
000566
000566
000566
000566
000566
000566
000566
000566
000566
000566
000566
000568
000568
000568
000568
000568
000568
000568
000568
000568
000568
000568
000570
000570
000570
000570
000570
000570
000570
000570
000570
000570
000570
000572
000572
000572
000572
000572
000572
000572
000572
000572
000572
000572
000576
000576
000576
000576
000576
000576
000576
000576
000576
000576
000576
000581
000581
000581
000581
000581
000581
000581
000581
000581
000581
000581
000584
000584
000584
000584
000584
000584
000584
000585
000585
000585
000585
000585
000585
000585
000585
000585
000586
000586
000586
000586
000586
000586
000586
000586
000586
000586
000586
000587
000587
000587
000587
000587
000587
000589
000589
000589
000589
000589
000589
000589
000589
000589
000589
000589
000590
000590
000590
000590
000590
000590
000590
000590
000590
000590
000590
000592
000592
000592
000592
000592
000592
000592
000592
000592
000592
000592
000595
000595
000595
000595
000595
000595
000595
000595
000595
000595
000595
000596
000596
000596
000596
000596
000596
000596
000596
000596
000596
000596
000597
000597
000597
000597
000597
000597
000597
000597
000597
000597
000597
000599
000599
000599
000599
000599
000599
000599
000599
000599
000599
000599
000612
000612
000612
000612
000612
000612
000612
000612
000612
000612
000619
000619
000619
000619
000619
000619
000619
000619
000619
000619
000619
000623
000623
000623
000623
000623
000623
000623
000623
000623
000623
000623
000625
000625
000625
000625
000625
000625
000625
000625
000625
000625
000625
000629
000629
000629
000629
000629
000629
000629
000629
000629
000629
000629
000630
000630
000630
000630
000630
000630
000630
000630
000630
000630
000630
000633
000633
000635
000635
000635
000635
000635
000635
000635
000635
000635
000635
000636
000636
000636
000636
000636
000636
000636
000636
000636
000636
000636
000637
000637
000637
000637
000637
000637
000637
000637
000637
000637
000637
000639
000639
000639
000639
000639
000639
000639
000639
000639
000639
000639
000650
000650
000650
000650
000650
000650
000650
000650
000650
000650
000650
000651
000651
000651
000651
000651
000651
000657
000657
000657
000657
000657
000657
000657
000657
000657
000657
000657
000659
000659
000659
000659
000659
000659
000661
000661
000661
000661
000661
000661
000661
000661
000661
000661
000661
000672
000672
000672
000672
000672
000672
000672
000672
000672
000672
000672
000677
000677
000677
000677
000677
000677
000677
000677
000677
000677
000677
000678
000678
000678
000678
000678
000678
000678
000678
000678
000678
000678
000680
000680
000680
000680
000680
000680
000680
000680
000680
000680
000680
000683
000683
000683
000683
000683
000683
000683
000683
000683
000683
000687
000687
000687
000687
000687
000687
000687
000687
000687
000691
000691
000691
000691
000695
000695
000695
000695
000695
000695
000697
000697
000697
000697
000697
000697
000697
000697
000698
000698
000698
000698
000698
000698
000698
000698
000698
000698
000698
000700
000700
000700
000700
000700
000700
000700
000700
000700
000700
000700
000702
000702
000702
000702
000702
000702
000702
000702
000702
000702
000702
000702
000702
000702
000703
000703
000703
000703
000703
000703
000707
000707
000707
000707
000707
000707
000707
000707
000707
000707
000707
000708
000708
000708
000708
000708
000708
000708
000708
000708
000708
000708
000709
000709
000709
000709
000709
000709
000709
000709
000709
000709
000709
000716
000716
000716
000716
000716
000716
000716
000716
000716
000716
000716
000717
000717
000717
000717
000717
000717
000717
000717
000717
000717
000717
000723
000723
000723
000723
000723
000723
000723
000723
000725
000725
000725
000725
000725
000725
000725
000725
000725
000725
000725
000726
000726
000726
000726
000726
000726
000726
000726
000726
000726
000726
000727
000727
000727
000727
000727
000727
000727
000727
000727
000727
000727
000729
000729
000729
000729
000729
000729
000729
000729
000729
000729
000731
000731
000731
000731
000731
000731
000731
000731
000731
000731
000731
000733
000733
000733
000733
000733
000733
000733
000733
000733
000733
000733
000737
000737
000737
000737
000737
000737
000737
000737
000737
000737
000737
000738
000738
000738
000738
000738
000738
000738
000738
000738
000738
000738
000739
000739
000739
000739
000739
000739
000739
000739
000739
000739
000739
000748
000748
000748
000751
000751
000751
000751
000751
000751
000751
000751
000751
000751
000751
000756
000756
000756
000756
000756
000756
000756
000756
000756
000756
000756
000756
000760
000760
000760
000760
000760
000760
000760
000760
000761
000761
000761
000761
000761
000761
000761
000761
000761
000761
000761
000766
000766
000766
000766
000766
000766
000766
000766
000766
000766
000766
000768
000768
000768
000768
000768
000768
000768
000768
000768
000768
000768
000777
000777
000777
000777
000777
000777
000777
000777
000777
000777
000777
000778
000778
000778
000778
000778
000778
000778
000778
000778
000778
000778
000782
000782
000782
000782
000782
000782
000782
000782
000782
000782
000782
000786
000786
000786
000786
000786
000786
000786
000786
000786
000786
000786
000788
000788
000788
000788
000788
000788
000788
000788
000788
000788
000788
000789
000789
000789
000789
000789
000789
000790
000790
000790
000790
000790
000790
000790
000790
000790
000790
000790
000792
000792
000792
000792
000792
000792
000792
000792
000792
000792
000792
000795
000795
000795
000795
000795
000795
000795
000795
000795
000795
000795
000799
000799
000799
000799
000799
000799
000799
000799
000800
000800
000800
000800
000800
000800
000800
000800
000800
000800
000800
000801
000801
000801
000801
000801
000801
000801
000801
000801
000801
000801
000806
000806
000806
000806
000806
000806
000806
000806
000806
000806
000807
000807
000807
000807
000807
000807
000807
000807
000807
000807
000807
000810
000810
000810
000810
000810
000810
000810
000810
000810
000810
000810
000811
000811
000811
000811
000811
000811
000811
000811
000811
000811
000811
000812
000812
000812
000812
000812
000812
000812
000812
000812
000812
000813
000813
000813
000813
000813
000813
000813
000813
000813
000813
000813
000815
000815
000815
000815
000815
000815
000815
000815
000815
000815
000815
000816
000816
000816
000816
000816
000816
000816
000816
000816
000816
000816
000818
000818
000818
000818
000818
000818
000818
000818
000818
000818
000818
000819
000819
000819
000819
000819
000819
000819
000819
000819
000819
000819
000821
000821
000821
000821
000821
000821
000821
000821
000821
000821
000821
000822
000822
000822
000822
000822
000823
000823
000823
000823
000823
000823
000823
000823
000823
000823
000823
000825
000825
000825
000825
000825
000825
000825
000825
000825
000825
000825
000830
000830
000830
000830
000830
000830
000830
000830
000830
000830
000830
000831
000831
000831
000831
000831
000831
000831
000831
000831
000831
000831
000836
000836
000836
000836
000836
000836
000836
000836
000836
000836
000836
000837
000837
000837
000837
000837
000837
000837
000837
000837
000837
000837
000848
000848
000848
000848
000848
000848
000848
000848
000848
000848
000848
000850
000850
000850
000850
000850
000850
000850
000850
000850
000850
000850
000852
000852
000852
000852
000852
000852
000852
000852
000852
000852
000852
000856
000856
000856
000856
000856
000856
000856
000856
000856
000856
000856
000858
000858
000858
000858
000858
000858
000858
000858
000858
000858
000858
000859
000859
000859
000859
000859
000859
000859
000859
000859
000859
000859
000860
000860
000860
000860
000860
000860
000860
000860
000868
000868
000868
000868
000868
000868
000868
000868
000868
000868
000868
000869
000869
000869
000869
000869
000869
000869
000869
000869
000876
000876
000876
000876
000876
000876
000876
000876
000876
000876
000876
000877
000877
000877
000877
000877
000877
000877
000877
000877
000877
000877
000878
000878
000878
000878
000878
000878
000878
000878
000878
000878
000880
000880
000880
000880
000880
000880
000880
000880
000880
000880
000880
000881
000881
000881
000881
000881
000881
000881
000881
000887
000887
000887
000887
000887
000887
000887
000887
000887
000887
000887
000890
000890
000890
000890
000890
000890
000890
000890
000890
000893
000893
000893
000893
000895
000895
000895
000895
000895
000895
000895
000895
000895
000895
000895
000898
000898
000898
000898
000898
000898
000898
000898
000898
000898
000898
000901
000901
000901
000901
000901
000901
000901
000901
000901
000901
000901
000902
000902
000902
000902
000902
000902
000902
000902
000902
000902
000903
000903
000903
000903
000903
000903
000903
000903
000903
000903
000903
000908
000908
000908
000908
000908
000908
000908
000908
000908
000908
000908
000910
000910
000910
000910
000910
000910
000910
000910
000910
000910
000910
000911
000911
000911
000911
000911
000911
000911
000911
000911
000911
000911
000912
000912
000912
000912
000912
000912
000912
000912
000912
000912
000912
000913
000913
000913
000913
000913
000913
000913
000913
000913
000913
000913
000915
000915
000915
000915
000915
000915
000915
000915
000915
000915
000915
000919
000919
000919
000919
000919
000919
000919
000919
000919
000919
000919
000920
000920
000920
000920
000920
000920
000920
000920
000920
000920
000920
000921
000921
000921
000921
000921
000921
000921
000921
000921
000922
000922
000922
000922
000922
000922
000922
000922
000922
000922
000925
000925
000925
000925
000925
000925
000925
000925
000925
000925
000925
000929
000929
000929
000929
000929
000929
000929
000929
000929
000929
000929
000930
000930
000930
000930
000930
000930
000930
000930
000930
000930
000930
000931
000931
000931
000931
000931
000931
000931
000931
000931
000931
000932
000932
000932
[truncated: 31,482 more rows]
